# Supplementary material
Source: PubMed Central journal article supplement (PMC7376385)
Supplement: NIHMS1580322-supplement-SUPL__Table_4.pdf [file NIHMS1580322-supplement-SUPL__Table_4.pdf]

**Table S4. Cluster specific differential expressed genes**

| cluster | gene       | avg_logFC | p_val     | p_val_adj |
|---------|------------|-----------|-----------|-----------|
| C01     | Txnip      | 0.604     | 0         | 0         |
| C01     | Ifitm1     | 0.434     | 0         | 0         |
| C01     | Hlf        | 0.406     | 0         | 0         |
| C01     | Tpx2       | -0.407    | 0         | 0         |
| C01     | Cdc20      | -0.413    | 0         | 0         |
| C01     | Ccnb2      | -0.416    | 0         | 0         |
| C01     | Prc1       | -0.416    | 0         | 0         |
| C01     | Smc4       | -0.458    | 0         | 0         |
| C01     | Ccna2      | -0.461    | 0         | 0         |
| C01     | Smc2       | -0.462    | 0         | 0         |
| C01     | Spc24      | -0.481    | 0         | 0         |
| C01     | Nucks1     | -0.482    | 0         | 0         |
| C01     | Cdk1       | -0.494    | 0         | 0         |
| C01     | Ube2s      | -0.515    | 0         | 0         |
| C01     | Cks1b      | -0.515    | 0         | 0         |
| C01     | H2afz      | -0.525    | 0         | 0         |
| C01     | Nusap1     | -0.531    | 0         | 0         |
| C01     | Tuba1b     | -0.533    | 0         | 0         |
| C01     | Tubb4b     | -0.541    | 0         | 0         |
| C01     | Cdca3      | -0.545    | 0         | 0         |
| C01     | Cenpf      | -0.574    | 0         | 0         |
| C01     | Tubb5      | -0.585    | 0         | 0         |
| C01     | Cenpa      | -0.621    | 0         | 0         |
| C01     | Klf6       | -0.641    | 0         | 0         |
| C01     | 2810417H13 | -0.661    | 0         | 0         |
| C01     | Cdca8      | -0.662    | 0         | 0         |
| C01     | H2afx      | -0.729    | 0         | 0         |
| C01     | Mki67      | -0.731    | 0         | 0         |
| C01     | Cks2       | -0.817    | 0         | 0         |
| C01     | Hmgb2      | -0.824    | 0         | 0         |
| C01     | Top2a      | -0.84     | 0         | 0         |
| C01     | Birc5      | -0.862    | 0         | 0         |
| C01     | Ube2c      | -0.934    | 0         | 0         |
| C01     | Hist1h2ap  | -1.007    | 0         | 0         |
| C01     | Klf2       | -0.643    | 9.35E-281 | 1.38E-276 |
| C01     | Mt1        | -0.574    | 2.06E-258 | 3.04E-254 |
| C01     | Cd69       | -0.423    | 7.23E-239 | 1.06E-234 |
| C01     | Dusp1      | -0.571    | 3.51E-235 | 5.16E-231 |
| C01     | Junb       | -0.546    | 3.12E-197 | 4.60E-193 |
| C01     | Fosb       | -0.575    | 3.27E-176 | 4.81E-172 |
| C01     | Zfp36      | -0.525    | 2.78E-166 | 4.09E-162 |

|     |           |        |           |           |
|-----|-----------|--------|-----------|-----------|
| C01 | Fos       | -1.247 | 5.12E-166 | 7.54E-162 |
| C01 | Ms4a3     | -0.69  | 3.01E-155 | 4.43E-151 |
| C01 | Elane     | -1.211 | 6.22E-140 | 9.16E-136 |
| C01 | Egr1      | -0.489 | 2.67E-117 | 3.94E-113 |
| C01 | Wfdc17    | 0.42   | 3.84E-88  | 5.65E-84  |
| C01 | Ctsg      | -0.672 | 1.97E-71  | 2.91E-67  |
| C01 | Bex4      | -0.42  | 4.12E-69  | 6.07E-65  |
| C01 | Pf4       | -0.766 | 6.15E-57  | 9.05E-53  |
| C01 | Ier2      | -0.408 | 7.69E-42  | 1.13E-37  |
| C01 | Jun       | -0.55  | 3.02E-31  | 4.45E-27  |
| C01 | Jund      | -0.464 | 1.29E-25  | 1.89E-21  |
| C01 | Mpo       | -0.635 | 5.68E-24  | 8.37E-20  |
| C01 | Dntt      | -0.474 | 2.84E-10  | 4.18E-06  |
| C02 | Hist1h2ap | 1.128  | 0         | 0         |
| C02 | Ube2c     | 1.074  | 0         | 0         |
| C02 | Top2a     | 1      | 0         | 0         |
| C02 | H2afx     | 0.946  | 0         | 0         |
| C02 | Birc5     | 0.931  | 0         | 0         |
| C02 | Hmgb2     | 0.893  | 0         | 0         |
| C02 | Cenpf     | 0.887  | 0         | 0         |
| C02 | Tubb5     | 0.865  | 0         | 0         |
| C02 | Cdca8     | 0.849  | 0         | 0         |
| C02 | Mki67     | 0.822  | 0         | 0         |
| C02 | Cenpa     | 0.814  | 0         | 0         |
| C02 | Cks2      | 0.814  | 0         | 0         |
| C02 | Nusap1    | 0.802  | 0         | 0         |
| C02 | Tubb4b    | 0.733  | 0         | 0         |
| C02 | Ccnb2     | 0.707  | 0         | 0         |
| C02 | Cdca3     | 0.673  | 0         | 0         |
| C02 | Lockd     | 0.667  | 0         | 0         |
| C02 | Tuba1b    | 0.654  | 0         | 0         |
| C02 | Cdk1      | 0.649  | 0         | 0         |
| C02 | Cdc20     | 0.637  | 0         | 0         |
| C02 | Prc1      | 0.635  | 0         | 0         |
| C02 | Cks1b     | 0.626  | 0         | 0         |
| C02 | Tpx2      | 0.611  | 0         | 0         |
| C02 | Smc4      | 0.609  | 0         | 0         |
| C02 | Spc24     | 0.607  | 0         | 0         |
| C02 | Ube2s     | 0.591  | 0         | 0         |
| C02 | H2afv     | 0.584  | 0         | 0         |
| C02 | Nucks1    | 0.562  | 0         | 0         |
| C02 | Smc2      | 0.562  | 0         | 0         |
| C02 | Hist1h1b  | 0.558  | 0         | 0         |

|     |            |        |          |          |
|-----|------------|--------|----------|----------|
| C02 | Knstrn     | 0.551  | 0        | 0        |
| C02 | Stmn1      | 0.546  | 0        | 0        |
| C02 | Ccna2      | 0.544  | 0        | 0        |
| C02 | 2810417H13 | 0.54   | 0        | 0        |
| C02 | Pbk        | 0.54   | 0        | 0        |
| C02 | H2afz      | 0.539  | 0        | 0        |
| C02 | Fam64a     | 0.538  | 0        | 0        |
| C02 | Hmmr       | 0.527  | 0        | 0        |
| C02 | Ccnb1      | 0.526  | 0        | 0        |
| C02 | Arl6ip1    | 0.51   | 0        | 0        |
| C02 | Aurkb      | 0.501  | 0        | 0        |
| C02 | Incenp     | 0.472  | 0        | 0        |
| C02 | Neil3      | 0.464  | 0        | 0        |
| C02 | Cenpe      | 0.449  | 0        | 0        |
| C02 | Ccdc34     | 0.431  | 0        | 0        |
| C02 | Spc25      | 0.43   | 0        | 0        |
| C02 | Mis18bp1   | 0.424  | 0        | 0        |
| C02 | Hmgn2      | 0.422  | 0        | 0        |
| C02 | Hist1h4i   | 0.422  | 0        | 0        |
| C02 | Racgap1    | 0.418  | 0        | 0        |
| C02 | Hn1        | 0.412  | 0        | 0        |
| C02 | Kif20b     | 0.411  | 0        | 0        |
| C02 | Casc5      | 0.41   | 0        | 0        |
| C02 | Ncapd2     | 0.407  | 0        | 0        |
| C02 | Aldoa      | -0.433 | 0        | 0        |
| C02 | Dntt       | -0.512 | 1.93E-16 | 2.84E-12 |
| C03 | Fos        | 2.106  | 0        | 0        |
| C03 | Jun        | 1.402  | 0        | 0        |
| C03 | Zfp36      | 1.342  | 0        | 0        |
| C03 | Junb       | 1.322  | 0        | 0        |
| C03 | Jund       | 1.303  | 0        | 0        |
| C03 | Klf6       | 1.289  | 0        | 0        |
| C03 | Ier2       | 1.242  | 0        | 0        |
| C03 | Klf2       | 1.224  | 0        | 0        |
| C03 | Egr1       | 1.224  | 0        | 0        |
| C03 | Dusp1      | 1.215  | 0        | 0        |
| C03 | Fosb       | 1.211  | 0        | 0        |
| C03 | Btg2       | 1.039  | 0        | 0        |
| C03 | Ccl4       | 0.996  | 0        | 0        |
| C03 | Rgs2       | 0.984  | 0        | 0        |
| C03 | Rgs1       | 0.943  | 0        | 0        |
| C03 | Nr4a1      | 0.86   | 0        | 0        |
| C03 | Cd69       | 0.75   | 0        | 0        |

|     |             |        |           |            |
|-----|-------------|--------|-----------|------------|
| C03 | Rhob        | 0.686  | 0         | 0          |
| C03 | Ppp1r15a    | 0.664  | 0         | 0          |
| C03 | Ier3        | 0.659  | 0         | 0          |
| C03 | Nfkbiz      | 0.515  | 0         | 0          |
| C03 | Srsf5       | 0.507  | 0         | 0          |
| C03 | Pnrc1       | 0.468  | 2.05E-290 | 3.02E-286  |
| C03 | Ccl3        | 0.991  | 1.51E-276 | 2.22E-272  |
| C03 | Ubc         | 0.435  | 2.14E-259 | 3.15E-255  |
| C03 | Stk17b      | 0.413  | 2.22E-259 | 3.26E-255  |
| C03 | Hmgb2       | -0.701 | 2.98E-245 | 4.39E-241  |
| C03 | H2afx       | -0.451 | 4.96E-245 | 7.30E-241  |
| C03 | Mcl1        | 0.41   | 1.32E-220 | 1.95E-216  |
| C03 | Birc5       | -0.627 | 3.47E-218 | 5.10E-214  |
| C03 | Ier5        | 0.45   | 1.67E-216 | 2.46E-212  |
| C03 | Mki67       | -0.57  | 1.36E-213 | 2.00E-209  |
| C03 | Dusp2       | 0.653  | 4.67E-211 | 6.88E-207  |
| C03 | Ctla2a      | 0.426  | 3.53E-209 | 5.20E-205  |
| C03 | Cdca3       | -0.43  | 3.50E-204 | 5.15E-200  |
| C03 | Cdca8       | -0.522 | 1.41E-203 | 2.07E-199  |
| C03 | Ccnb2       | -0.488 | 7.92E-178 | 1.17E-173  |
| C03 | Cks2        | -0.594 | 1.16E-174 | 1.71E-170  |
| C03 | Top2a       | -0.621 | 9.91E-174 | 1.46E-169  |
| C03 | Pim1        | 0.461  | 3.24E-171 | 4.76E-167  |
| C03 | Cenpf       | -0.476 | 2.71E-160 | 3.99E-156  |
| C03 | Ube2c       | -0.69  | 1.10E-159 | 1.63E-155  |
| C03 | 2810417H13I | -0.52  | 9.94E-142 | 1.46E-137  |
| C03 | Cenpa       | -0.549 | 1.52E-119 | 2.23E-115  |
| C03 | H2afx       | -0.475 | 1.90E-111 | 2.80E-107  |
| C03 | Hist1h2ap   | -0.602 | 3.82E-93  | 5.63E-89   |
| C03 | Mt1         | -0.433 | 1.17E-69  | 1.72E-65   |
| C03 | Ms4a3       | -0.606 | 1.03E-55  | 1.52E-51   |
| C03 | Elane       | -1.061 | 7.28E-52  | 1.07E-47   |
| C03 | Ctsg        | -0.624 | 2.70E-25  | 3.97E-21   |
| C03 | Pf4         | -0.552 | 1.11E-07  | 0.0016392  |
| C03 | Mpo         | -0.475 | 2.60E-07  | 0.00382543 |
| C04 | Car1        | 2.252  | 0         | 0          |
| C04 | Pf4         | 1.97   | 0         | 0          |
| C04 | Hbb-bs      | 1.915  | 0         | 0          |
| C04 | Hba-a1      | 1.39   | 0         | 0          |
| C04 | Bex4        | 1.338  | 0         | 0          |
| C04 | Blvrb       | 1.286  | 0         | 0          |
| C04 | Gm15915     | 1.085  | 0         | 0          |
| C04 | Apoe        | 1      | 0         | 0          |

|     |         |       |   |   |
|-----|---------|-------|---|---|
| C04 | Tspo2   | 0.871 | 0 | 0 |
| C04 | Atpif1  | 0.844 | 0 | 0 |
| C04 | Aqp1    | 0.838 | 0 | 0 |
| C04 | Tmem14c | 0.828 | 0 | 0 |
| C04 | Klf1    | 0.816 | 0 | 0 |
| C04 | Sapcd1  | 0.753 | 0 | 0 |
| C04 | Mt2     | 0.74  | 0 | 0 |
| C04 | Gp1bb   | 0.709 | 0 | 0 |
| C04 | Car2    | 0.679 | 0 | 0 |
| C04 | Mt1     | 0.677 | 0 | 0 |
| C04 | Ermap   | 0.67  | 0 | 0 |
| C04 | Hmgb3   | 0.657 | 0 | 0 |
| C04 | Smim1   | 0.647 | 0 | 0 |
| C04 | Itga2b  | 0.637 | 0 | 0 |
| C04 | Isg20   | 0.622 | 0 | 0 |
| C04 | Vamp5   | 0.621 | 0 | 0 |
| C04 | Mfsd2b  | 0.617 | 0 | 0 |
| C04 | Cd9     | 0.6   | 0 | 0 |
| C04 | Ces2g   | 0.595 | 0 | 0 |
| C04 | Gata1   | 0.59  | 0 | 0 |
| C04 | Unc119  | 0.572 | 0 | 0 |
| C04 | Gstm5   | 0.57  | 0 | 0 |
| C04 | Sdsl    | 0.538 | 0 | 0 |
| C04 | Cited4  | 0.537 | 0 | 0 |
| C04 | Mrpl52  | 0.523 | 0 | 0 |
| C04 | H2-Q7   | 0.517 | 0 | 0 |
| C04 | Hemgn   | 0.515 | 0 | 0 |
| C04 | F2r     | 0.508 | 0 | 0 |
| C04 | Gypa    | 0.491 | 0 | 0 |
| C04 | Hmbs    | 0.487 | 0 | 0 |
| C04 | Nt5c3   | 0.478 | 0 | 0 |
| C04 | Tspan33 | 0.471 | 0 | 0 |
| C04 | Creg1   | 0.464 | 0 | 0 |
| C04 | Hdgf    | 0.463 | 0 | 0 |
| C04 | Samd14  | 0.447 | 0 | 0 |
| C04 | Khk     | 0.447 | 0 | 0 |
| C04 | Tnfaip2 | 0.436 | 0 | 0 |
| C04 | Rfesd   | 0.429 | 0 | 0 |
| C04 | Slc14a1 | 0.429 | 0 | 0 |
| C04 | Smim5   | 0.425 | 0 | 0 |
| C04 | Gp5     | 0.416 | 0 | 0 |
| C04 | Prkar2b | 0.412 | 0 | 0 |
| C04 | Sdpr    | 0.41  | 0 | 0 |

|     |           |        |           |           |
|-----|-----------|--------|-----------|-----------|
| C04 | Lyl1      | -0.477 | 0         | 0         |
| C04 | Tm6sf1    | -0.481 | 0         | 0         |
| C04 | Rcsd1     | -0.489 | 0         | 0         |
| C04 | Gm2a      | -0.491 | 0         | 0         |
| C04 | Sh3bgrl3  | -0.495 | 0         | 0         |
| C04 | Napsa     | -0.5   | 0         | 0         |
| C04 | Marcksl1  | -0.521 | 0         | 0         |
| C04 | Spi1      | -0.523 | 0         | 0         |
| C04 | Tmem176b  | -0.546 | 0         | 0         |
| C04 | Pgam1     | -0.558 | 0         | 0         |
| C04 | Coro1a    | -0.562 | 0         | 0         |
| C04 | Bex6      | -0.566 | 0         | 0         |
| C04 | Serpinb1a | -0.568 | 0         | 0         |
| C04 | Adgrl4    | -0.57  | 0         | 0         |
| C04 | Cd27      | -0.578 | 0         | 0         |
| C04 | Egfl7     | -0.601 | 0         | 0         |
| C04 | Lsp1      | -0.603 | 0         | 0         |
| C04 | Pkm       | -0.61  | 0         | 0         |
| C04 | Fkbp1a    | -0.619 | 0         | 0         |
| C04 | Igfbp4    | -0.619 | 0         | 0         |
| C04 | Satb1     | -0.634 | 0         | 0         |
| C04 | Sell      | -0.642 | 0         | 0         |
| C04 | Lcp1      | -0.705 | 0         | 0         |
| C04 | Tyrobp    | -0.724 | 0         | 0         |
| C04 | Flt3      | -0.763 | 0         | 0         |
| C04 | Cd53      | -0.776 | 0         | 0         |
| C04 | BC035044  | -0.781 | 0         | 0         |
| C04 | Limd2     | -0.848 | 0         | 0         |
| C04 | Ramp1     | -0.926 | 0         | 0         |
| C04 | Sox4      | -0.947 | 0         | 0         |
| C04 | Ccl9      | -0.96  | 0         | 0         |
| C04 | Cd52      | -1.002 | 0         | 0         |
| C04 | Emb       | -1.038 | 0         | 0         |
| C04 | Cd34      | -1.139 | 0         | 0         |
| C04 | Ifitm1    | -1.164 | 0         | 0         |
| C04 | H2afy     | -1.398 | 0         | 0         |
| C04 | Prtn3     | -1.523 | 0         | 0         |
| C04 | Tmem176a  | -0.474 | 3.62E-307 | 5.33E-303 |
| C04 | Gp9       | 0.417  | 1.54E-306 | 2.27E-302 |
| C04 | Fam69b    | -0.482 | 6.37E-297 | 9.38E-293 |
| C04 | Gm5111    | -0.491 | 1.44E-286 | 2.13E-282 |
| C04 | Hlf       | -0.634 | 2.96E-286 | 4.36E-282 |
| C04 | Pou2f2    | -0.46  | 8.34E-286 | 1.23E-281 |

|     |         |        |           |           |
|-----|---------|--------|-----------|-----------|
| C04 | GlrX5   | 0.651  | 1.68E-284 | 2.48E-280 |
| C04 | Rgs2    | -0.595 | 6.47E-283 | 9.53E-279 |
| C04 | Wfdc17  | -0.891 | 5.43E-276 | 7.99E-272 |
| C04 | Gata2   | 0.443  | 3.25E-274 | 4.78E-270 |
| C04 | Gpr171  | -0.473 | 1.23E-273 | 1.80E-269 |
| C04 | Clec4d  | 0.453  | 1.64E-273 | 2.41E-269 |
| C04 | Fyb     | 0.407  | 3.19E-271 | 4.69E-267 |
| C04 | Plac8   | -0.62  | 3.62E-267 | 5.33E-263 |
| C04 | Fxyd5   | -0.409 | 7.54E-266 | 1.11E-261 |
| C04 | Gclm    | 0.456  | 4.18E-265 | 6.16E-261 |
| C04 | Rexo2   | 0.418  | 4.09E-260 | 6.03E-256 |
| C04 | Anxa1   | -0.419 | 6.43E-260 | 9.46E-256 |
| C04 | Alad    | 0.542  | 2.60E-259 | 3.83E-255 |
| C04 | Gimap6  | -0.551 | 4.42E-259 | 6.51E-255 |
| C04 | Fam107b | -0.408 | 5.77E-259 | 8.49E-255 |
| C04 | Phgdh   | -0.418 | 9.17E-257 | 1.35E-252 |
| C04 | Mns1    | 0.478  | 6.98E-250 | 1.03E-245 |
| C04 | Ifi203  | -0.452 | 1.34E-249 | 1.98E-245 |
| C04 | Ms4a6c  | -0.454 | 1.34E-248 | 1.97E-244 |
| C04 | Pbx1    | 0.824  | 3.21E-243 | 4.73E-239 |
| C04 | Necap2  | 0.434  | 3.83E-242 | 5.64E-238 |
| C04 | S100a11 | -0.409 | 5.29E-241 | 7.78E-237 |
| C04 | Rgs10   | 0.56   | 1.13E-237 | 1.66E-233 |
| C04 | Myl10   | -0.653 | 3.22E-234 | 4.74E-230 |
| C04 | Mpo     | -1.26  | 5.00E-225 | 7.36E-221 |
| C04 | Gstm1   | -0.427 | 3.81E-221 | 5.60E-217 |
| C04 | Pim1    | -0.507 | 3.43E-208 | 5.05E-204 |
| C04 | Gcnt2   | -0.424 | 7.05E-205 | 1.04E-200 |
| C04 | Dntt    | -1.258 | 8.34E-194 | 1.23E-189 |
| C04 | Cd48    | -0.433 | 1.37E-193 | 2.02E-189 |
| C04 | Cks2    | 0.444  | 6.35E-189 | 9.34E-185 |
| C04 | Irf8    | -0.494 | 2.31E-188 | 3.40E-184 |
| C04 | Ypel3   | -0.411 | 1.39E-180 | 2.04E-176 |
| C04 | Pdcd4   | 0.528  | 5.18E-180 | 7.62E-176 |
| C04 | Clec12a | -0.447 | 1.66E-173 | 2.44E-169 |
| C04 | Ly6a    | -0.46  | 4.65E-170 | 6.84E-166 |
| C04 | Gimap1  | -0.422 | 1.56E-162 | 2.29E-158 |
| C04 | Dusp2   | -0.413 | 1.39E-155 | 2.04E-151 |
| C04 | Rap1b   | 0.605  | 1.12E-132 | 1.65E-128 |
| C04 | Ctsg    | -1.466 | 1.29E-125 | 1.90E-121 |
| C04 | Ltb     | -0.44  | 1.27E-123 | 1.86E-119 |
| C04 | Ccl4    | -0.467 | 6.26E-107 | 9.21E-103 |
| C04 | Isg15   | 0.497  | 1.57E-90  | 2.31E-86  |

|     |         |        |          |          |
|-----|---------|--------|----------|----------|
| C04 | Hbb-bt  | 1.506  | 9.50E-75 | 1.40E-70 |
| C04 | Klf2    | -0.43  | 2.15E-57 | 3.17E-53 |
| C04 | Fos     | -0.704 | 1.41E-55 | 2.08E-51 |
| C04 | Ms4a3   | -0.505 | 3.49E-15 | 5.14E-11 |
| C04 | S100a8  | -0.423 | 2.50E-12 | 3.68E-08 |
| C05 | Elane   | 2.933  | 0        | 0        |
| C05 | Ctsg    | 2.104  | 0        | 0        |
| C05 | Mpo     | 2.092  | 0        | 0        |
| C05 | Ms4a3   | 2.054  | 0        | 0        |
| C05 | Prtn3   | 1.771  | 0        | 0        |
| C05 | Ly6c2   | 1.471  | 0        | 0        |
| C05 | Mt1     | 1.269  | 0        | 0        |
| C05 | Ap3s1   | 1.231  | 0        | 0        |
| C05 | Hp      | 1.174  | 0        | 0        |
| C05 | Plac8   | 1.097  | 0        | 0        |
| C05 | Sdf2l1  | 1.025  | 0        | 0        |
| C05 | Lgals1  | 1.023  | 0        | 0        |
| C05 | Calr    | 0.854  | 0        | 0        |
| C05 | Anxa3   | 0.854  | 0        | 0        |
| C05 | Cst7    | 0.844  | 0        | 0        |
| C05 | Lcn2    | 0.835  | 0        | 0        |
| C05 | Rgcc    | 0.821  | 0        | 0        |
| C05 | Trem3   | 0.816  | 0        | 0        |
| C05 | Clec12a | 0.813  | 0        | 0        |
| C05 | Pgam1   | 0.808  | 0        | 0        |
| C05 | Ctsz    | 0.803  | 0        | 0        |
| C05 | Hspa5   | 0.788  | 0        | 0        |
| C05 | Irf8    | 0.779  | 0        | 0        |
| C05 | Hsp90b1 | 0.755  | 0        | 0        |
| C05 | Manf    | 0.747  | 0        | 0        |
| C05 | Slpi    | 0.735  | 0        | 0        |
| C05 | Cycs    | 0.71   | 0        | 0        |
| C05 | Tspo    | 0.689  | 0        | 0        |
| C05 | Uqcrq   | 0.689  | 0        | 0        |
| C05 | F13a1   | 0.687  | 0        | 0        |
| C05 | Msrb1   | 0.644  | 0        | 0        |
| C05 | Prss57  | 0.639  | 0        | 0        |
| C05 | Gng12   | 0.635  | 0        | 0        |
| C05 | Tyrobp  | 0.634  | 0        | 0        |
| C05 | Gsr     | 0.629  | 0        | 0        |
| C05 | Ms4a6c  | 0.626  | 0        | 0        |
| C05 | Hspd1   | 0.622  | 0        | 0        |
| C05 | Lrrc59  | 0.604  | 0        | 0        |



|     |             |       |   |   |
|-----|-------------|-------|---|---|
| C05 | Nhp2        | 0.602 | 0 | 0 |
| C05 | Mif         | 0.597 | 0 | 0 |
| C05 | Atp5g1      | 0.59  | 0 | 0 |
| C05 | P4hb        | 0.589 | 0 | 0 |
| C05 | Srm         | 0.572 | 0 | 0 |
| C05 | Pdia6       | 0.57  | 0 | 0 |
| C05 | Timm13      | 0.569 | 0 | 0 |
| C05 | Rps27l      | 0.567 | 0 | 0 |
| C05 | Erp29       | 0.562 | 0 | 0 |
| C05 | Ccr2        | 0.562 | 0 | 0 |
| C05 | Rrm2        | 0.558 | 0 | 0 |
| C05 | Tomm5       | 0.557 | 0 | 0 |
| C05 | Tuba4a      | 0.553 | 0 | 0 |
| C05 | Ssr2        | 0.552 | 0 | 0 |
| C05 | Sec61b      | 0.546 | 0 | 0 |
| C05 | Ldha        | 0.544 | 0 | 0 |
| C05 | Fkbp11      | 0.543 | 0 | 0 |
| C05 | Ssr1        | 0.541 | 0 | 0 |
| C05 | Sec61g      | 0.539 | 0 | 0 |
| C05 | Dmkn        | 0.538 | 0 | 0 |
| C05 | Mrpl33      | 0.536 | 0 | 0 |
| C05 | Dbi         | 0.536 | 0 | 0 |
| C05 | Nme1        | 0.512 | 0 | 0 |
| C05 | Gpx1        | 0.508 | 0 | 0 |
| C05 | Ranbp1      | 0.504 | 0 | 0 |
| C05 | Mrpl20      | 0.502 | 0 | 0 |
| C05 | Igsf6       | 0.498 | 0 | 0 |
| C05 | Ran         | 0.497 | 0 | 0 |
| C05 | Rpn1        | 0.493 | 0 | 0 |
| C05 | Tfrc        | 0.493 | 0 | 0 |
| C05 | Hspe1       | 0.493 | 0 | 0 |
| C05 | Ostc        | 0.484 | 0 | 0 |
| C05 | Mrpl12      | 0.483 | 0 | 0 |
| C05 | Uqcr11      | 0.483 | 0 | 0 |
| C05 | C1qbp       | 0.478 | 0 | 0 |
| C05 | Bola2       | 0.477 | 0 | 0 |
| C05 | Mydgf       | 0.476 | 0 | 0 |
| C05 | Wfdc21      | 0.475 | 0 | 0 |
| C05 | Tmem97      | 0.472 | 0 | 0 |
| C05 | Tmed2       | 0.472 | 0 | 0 |
| C05 | Cox5a       | 0.464 | 0 | 0 |
| C05 | 2700094K13I | 0.464 | 0 | 0 |
| C05 | F630028O10  | 0.456 | 0 | 0 |

|     |            |        |           |           |
|-----|------------|--------|-----------|-----------|
| C05 | Baz1a      | 0.452  | 0         | 0         |
| C05 | Gapdh      | 0.447  | 0         | 0         |
| C05 | Alas1      | 0.443  | 0         | 0         |
| C05 | Uqcr10     | 0.442  | 0         | 0         |
| C05 | Ybx1       | 0.439  | 0         | 0         |
| C05 | Npm3       | 0.428  | 0         | 0         |
| C05 | Shfm1      | 0.427  | 0         | 0         |
| C05 | Atp8b4     | 0.426  | 0         | 0         |
| C05 | Eif5a      | 0.42   | 0         | 0         |
| C05 | H2-K1      | -0.478 | 0         | 0         |
| C05 | B2m        | -0.489 | 0         | 0         |
| C05 | Sepw1      | -0.559 | 0         | 0         |
| C05 | Crip1      | -0.574 | 0         | 0         |
| C05 | Ptprcap    | -0.584 | 0         | 0         |
| C05 | Tspan13    | -0.616 | 0         | 0         |
| C05 | Meis1      | -0.681 | 0         | 0         |
| C05 | H2-Q7      | -0.694 | 0         | 0         |
| C05 | Adgrg1     | -0.758 | 0         | 0         |
| C05 | Tsc22d1    | -0.762 | 0         | 0         |
| C05 | Gimap1     | -0.765 | 0         | 0         |
| C05 | Malat1     | -0.913 | 0         | 0         |
| C05 | Ctla2a     | -1.377 | 0         | 0         |
| C05 | Car2       | -1.521 | 0         | 0         |
| C05 | Emb        | 0.578  | 4.71E-305 | 6.93E-301 |
| C05 | Smdt1      | 0.407  | 3.07E-298 | 4.51E-294 |
| C05 | Nrgn       | -0.641 | 3.25E-298 | 4.78E-294 |
| C05 | Set        | 0.431  | 3.22E-297 | 4.75E-293 |
| C05 | Cacybp     | 0.478  | 4.84E-296 | 7.13E-292 |
| C05 | Cox7a2l    | -0.456 | 5.96E-293 | 8.77E-289 |
| C05 | Vamp5      | -0.708 | 3.14E-292 | 4.63E-288 |
| C05 | Serp1      | 0.454  | 5.72E-290 | 8.43E-286 |
| C05 | Hsp90aa1   | 0.433  | 6.77E-290 | 9.97E-286 |
| C05 | Lyar       | 0.508  | 8.78E-287 | 1.29E-282 |
| C05 | Lman2      | 0.416  | 1.90E-279 | 2.79E-275 |
| C05 | Canx       | 0.428  | 7.97E-277 | 1.17E-272 |
| C05 | Sox4       | -0.75  | 1.48E-272 | 2.18E-268 |
| C05 | Fabp5      | 0.518  | 3.67E-271 | 5.40E-267 |
| C05 | Atp5k      | 0.407  | 4.68E-271 | 6.89E-267 |
| C05 | Odc1       | 0.469  | 1.75E-269 | 2.57E-265 |
| C05 | Txnip      | -0.794 | 1.11E-268 | 1.63E-264 |
| C05 | Paip2      | -0.446 | 1.52E-268 | 2.24E-264 |
| C05 | Ybx3       | 0.446  | 2.72E-268 | 4.00E-264 |
| C05 | 2810417H13 | 0.523  | 1.07E-267 | 1.58E-263 |

|     |          |        |           |           |
|-----|----------|--------|-----------|-----------|
| C05 | Med21    | 0.452  | 3.97E-264 | 5.84E-260 |
| C05 | Gimap6   | -0.633 | 2.72E-263 | 4.00E-259 |
| C05 | Tspan32  | -0.551 | 2.23E-260 | 3.29E-256 |
| C05 | Tmem176b | -0.544 | 1.52E-254 | 2.23E-250 |
| C05 | Ypel3    | -0.601 | 8.22E-245 | 1.21E-240 |
| C05 | 1-Sep    | -0.525 | 7.10E-243 | 1.05E-238 |
| C05 | Gltscr2  | -0.442 | 4.59E-242 | 6.75E-238 |
| C05 | Zfp36l2  | -0.513 | 2.50E-239 | 3.69E-235 |
| C05 | Eno1     | 0.446  | 4.46E-237 | 6.56E-233 |
| C05 | Pdia3    | 0.415  | 3.61E-234 | 5.31E-230 |
| C05 | Dut      | 0.409  | 1.64E-228 | 2.42E-224 |
| C05 | Pnrc1    | -0.547 | 1.35E-226 | 1.98E-222 |
| C05 | S100a10  | -0.429 | 8.97E-225 | 1.32E-220 |
| C05 | Akap13   | -0.488 | 1.36E-224 | 2.00E-220 |
| C05 | Tmed3    | 0.414  | 4.31E-224 | 6.34E-220 |
| C05 | Hlf      | -0.683 | 4.43E-218 | 6.52E-214 |
| C05 | Bcl11a   | -0.518 | 6.61E-215 | 9.72E-211 |
| C05 | Angpt1   | -0.522 | 4.16E-214 | 6.12E-210 |
| C05 | Dapp1    | -0.505 | 4.55E-203 | 6.70E-199 |
| C05 | Ogt      | -0.503 | 7.30E-202 | 1.07E-197 |
| C05 | Myct1    | -0.529 | 3.35E-200 | 4.93E-196 |
| C05 | Gcnt2    | -0.508 | 1.45E-199 | 2.13E-195 |
| C05 | Pnrsr    | -0.435 | 8.27E-187 | 1.22E-182 |
| C05 | Pla2g16  | -0.434 | 4.59E-181 | 6.75E-177 |
| C05 | Msi2     | -0.474 | 6.69E-181 | 9.85E-177 |
| C05 | Gm5111   | -0.466 | 2.07E-180 | 3.05E-176 |
| C05 | Lmo2     | -0.418 | 3.25E-173 | 4.78E-169 |
| C05 | Zbtb20   | -0.453 | 4.19E-168 | 6.16E-164 |
| C05 | Jund     | -0.772 | 2.37E-167 | 3.50E-163 |
| C05 | Rab38    | -0.473 | 4.21E-167 | 6.19E-163 |
| C05 | Pbx1     | -0.636 | 1.01E-166 | 1.49E-162 |
| C05 | Tsc22d3  | -0.523 | 9.13E-163 | 1.34E-158 |
| C05 | Mef2c    | -0.446 | 2.82E-161 | 4.15E-157 |
| C05 | Dstn     | 0.531  | 1.50E-159 | 2.21E-155 |
| C05 | Nrip1    | -0.443 | 5.44E-159 | 8.00E-155 |
| C05 | Fcer1g   | 0.438  | 7.05E-159 | 1.04E-154 |
| C05 | Hhex     | -0.412 | 4.96E-157 | 7.30E-153 |
| C05 | H2-Q4    | -0.431 | 8.82E-155 | 1.30E-150 |
| C05 | H2-Q6    | -0.433 | 2.50E-153 | 3.68E-149 |
| C05 | Rbp1     | -0.456 | 4.83E-153 | 7.11E-149 |
| C05 | Ikzf2    | -0.406 | 3.70E-148 | 5.45E-144 |
| C05 | Ptpre    | -0.433 | 1.04E-147 | 1.53E-143 |
| C05 | Adgrl4   | -0.459 | 1.43E-147 | 2.11E-143 |

|     |           |        |           |           |
|-----|-----------|--------|-----------|-----------|
| C05 | Rgs1      | -0.575 | 6.43E-147 | 9.46E-143 |
| C05 | Sdsl      | -0.484 | 1.82E-141 | 2.68E-137 |
| C05 | Gata2     | -0.471 | 3.88E-139 | 5.71E-135 |
| C05 | Myl10     | -0.607 | 1.52E-138 | 2.24E-134 |
| C05 | Egfl7     | -0.433 | 4.26E-136 | 6.26E-132 |
| C05 | Ltb       | -0.497 | 1.23E-135 | 1.81E-131 |
| C05 | Cbfa2t3   | -0.417 | 6.45E-135 | 9.50E-131 |
| C05 | Samsn1    | -0.409 | 1.59E-130 | 2.35E-126 |
| C05 | ApoE      | -0.798 | 2.40E-128 | 3.54E-124 |
| C05 | Gm10709   | 0.418  | 9.48E-119 | 1.40E-114 |
| C05 | Glul      | -0.425 | 3.82E-118 | 5.63E-114 |
| C05 | Ifi203    | -0.407 | 1.43E-117 | 2.11E-113 |
| C05 | Serpina3g | -0.576 | 1.73E-108 | 2.55E-104 |
| C05 | Jun       | -0.788 | 8.22E-108 | 1.21E-103 |
| C05 | Cd34      | -0.407 | 2.02E-103 | 2.97E-99  |
| C05 | Gstm1     | 0.442  | 1.58E-99  | 2.32E-95  |
| C05 | Shisa5    | -0.43  | 2.00E-97  | 2.94E-93  |
| C05 | Pik3ip1   | -0.409 | 3.73E-88  | 5.50E-84  |
| C05 | Egr1      | -0.56  | 1.27E-87  | 1.87E-83  |
| C05 | Xist      | -0.838 | 1.84E-79  | 2.71E-75  |
| C05 | Dntt      | -0.752 | 5.68E-63  | 8.36E-59  |
| C05 | Ly6a      | -0.428 | 1.22E-59  | 1.80E-55  |
| C05 | Btg2      | -0.473 | 1.73E-58  | 2.55E-54  |
| C05 | Blvrb     | -0.454 | 1.99E-52  | 2.93E-48  |
| C05 | Fos       | -1.042 | 7.60E-49  | 1.12E-44  |
| C05 | Fosb      | -0.482 | 1.16E-41  | 1.70E-37  |
| C05 | Pf4       | -0.752 | 3.07E-38  | 4.52E-34  |
| C05 | Hbb-bt    | -0.92  | 3.43E-33  | 5.05E-29  |
| C05 | Dusp1     | -0.457 | 5.30E-32  | 7.80E-28  |
| C05 | Zfp36     | -0.461 | 9.22E-22  | 1.36E-17  |
| C05 | Ier2      | -0.461 | 5.42E-20  | 7.98E-16  |
| C05 | Klf6      | -0.427 | 2.54E-14  | 3.73E-10  |
| C05 | S100a9    | 1.439  | 5.35E-09  | 7.88E-05  |
| C06 | Dntt      | 2.05   | 0         | 0         |
| C06 | Ly6d      | 1.843  | 0         | 0         |
| C06 | Ebf1      | 1.504  | 0         | 0         |
| C06 | Myl10     | 1.397  | 0         | 0         |
| C06 | Cd79a     | 1.145  | 0         | 0         |
| C06 | Igll1     | 1.106  | 0         | 0         |
| C06 | Bfsp2     | 1.024  | 0         | 0         |
| C06 | Vpreb3    | 1.012  | 0         | 0         |
| C06 | Mzb1      | 0.973  | 0         | 0         |
| C06 | Crip1     | 0.896  | 0         | 0         |

|     |           |        |           |           |
|-----|-----------|--------|-----------|-----------|
| C06 | Cox6a2    | 0.8    | 0         | 0         |
| C06 | Blnk      | 0.759  | 0         | 0         |
| C06 | Myl4      | 0.752  | 0         | 0         |
| C06 | Irf8      | 0.747  | 0         | 0         |
| C06 | Xrcc6     | 0.722  | 0         | 0         |
| C06 | Il7r      | 0.703  | 0         | 0         |
| C06 | Cnn3      | 0.686  | 0         | 0         |
| C06 | Arpp21    | 0.655  | 0         | 0         |
| C06 | Clec12a   | 0.652  | 0         | 0         |
| C06 | Mgst2     | 0.639  | 0         | 0         |
| C06 | Il12a     | 0.629  | 0         | 0         |
| C06 | H2afy     | 0.619  | 0         | 0         |
| C06 | Tpm4      | 0.56   | 0         | 0         |
| C06 | Pgls      | 0.557  | 0         | 0         |
| C06 | Tmem108   | 0.53   | 0         | 0         |
| C06 | Evl       | 0.53   | 0         | 0         |
| C06 | Vpreb2    | 0.528  | 0         | 0         |
| C06 | Notch1    | 0.497  | 0         | 0         |
| C06 | Cmah      | 0.486  | 0         | 0         |
| C06 | Ly86      | 0.472  | 0         | 0         |
| C06 | Rag1      | 0.472  | 0         | 0         |
| C06 | Lck       | 0.416  | 0         | 0         |
| C06 | Rab38     | -0.72  | 0         | 0         |
| C06 | Vamp8     | -0.743 | 0         | 0         |
| C06 | Lmo2      | -0.775 | 0         | 0         |
| C06 | Vamp5     | -0.824 | 0         | 0         |
| C06 | Cd63      | -1.045 | 0         | 0         |
| C06 | Car2      | -1.276 | 0         | 0         |
| C06 | Prtn3     | -1.41  | 0         | 0         |
| C06 | Plac8     | 0.612  | 4.71E-299 | 6.94E-295 |
| C06 | Tmsb10    | 0.467  | 6.51E-290 | 9.59E-286 |
| C06 | Cd52      | 0.648  | 3.41E-280 | 5.03E-276 |
| C06 | Serpina3g | -0.837 | 7.18E-276 | 1.06E-271 |
| C06 | Ifitm2    | -0.468 | 7.05E-268 | 1.04E-263 |
| C06 | Dapp1     | -0.613 | 3.24E-267 | 4.77E-263 |
| C06 | Satb1     | 0.562  | 5.68E-264 | 8.37E-260 |
| C06 | Vpreb1    | 1.127  | 2.55E-261 | 3.76E-257 |
| C06 | Tmem121   | 0.422  | 6.84E-256 | 1.01E-251 |
| C06 | Cdv3      | 0.667  | 5.21E-252 | 7.68E-248 |
| C06 | Egfl7     | 0.531  | 8.39E-236 | 1.23E-231 |
| C06 | Ifitm3    | -0.619 | 1.27E-229 | 1.88E-225 |
| C06 | Ctla2a    | -0.758 | 6.62E-220 | 9.74E-216 |
| C06 | Myct1     | -0.575 | 8.33E-220 | 1.23E-215 |

|     |             |        |           |           |
|-----|-------------|--------|-----------|-----------|
| C06 | Creg1       | -0.514 | 2.76E-213 | 4.06E-209 |
| C06 | Flt3        | 0.486  | 6.30E-207 | 9.27E-203 |
| C06 | Sdsl        | -0.578 | 2.39E-206 | 3.52E-202 |
| C06 | 4930519L02F | -0.479 | 4.66E-202 | 6.86E-198 |
| C06 | Gata2       | -0.542 | 4.46E-191 | 6.56E-187 |
| C06 | Hlf         | -0.645 | 1.84E-183 | 2.71E-179 |
| C06 | Adgrg1      | -0.53  | 4.40E-183 | 6.47E-179 |
| C06 | Mef2c       | 0.447  | 1.98E-182 | 2.91E-178 |
| C06 | Gclm        | -0.487 | 5.87E-182 | 8.64E-178 |
| C06 | Cdkn1a      | 0.418  | 1.32E-178 | 1.94E-174 |
| C06 | Atpif1      | -0.472 | 5.01E-172 | 7.37E-168 |
| C06 | Angpt1      | -0.504 | 1.22E-171 | 1.80E-167 |
| C06 | Atp1b3      | 0.642  | 1.58E-168 | 2.32E-164 |
| C06 | Parp1       | 0.523  | 7.44E-168 | 1.10E-163 |
| C06 | Ikzf2       | -0.465 | 1.13E-167 | 1.67E-163 |
| C06 | Cd9         | -0.489 | 5.91E-165 | 8.70E-161 |
| C06 | BC035044    | 0.435  | 8.90E-164 | 1.31E-159 |
| C06 | Apoe        | -0.99  | 1.18E-162 | 1.73E-158 |
| C06 | Gng11       | -0.439 | 2.03E-160 | 2.98E-156 |
| C06 | Vim         | -0.551 | 1.15E-159 | 1.70E-155 |
| C06 | Nfe2        | -0.415 | 1.27E-158 | 1.88E-154 |
| C06 | Mta3        | 0.447  | 3.64E-158 | 5.36E-154 |
| C06 | Rgcc        | 0.443  | 1.71E-157 | 2.52E-153 |
| C06 | Anxa5       | -0.415 | 1.59E-155 | 2.34E-151 |
| C06 | Adgrg3      | 0.411  | 1.38E-152 | 2.03E-148 |
| C06 | Ctr9        | 0.451  | 2.94E-148 | 4.32E-144 |
| C06 | Cd37        | 0.436  | 8.54E-147 | 1.26E-142 |
| C06 | Cd93        | 0.433  | 9.09E-147 | 1.34E-142 |
| C06 | Krt18       | -0.419 | 8.40E-142 | 1.24E-137 |
| C06 | Gimap6      | 0.42   | 5.36E-137 | 7.89E-133 |
| C06 | Ifitm1      | -0.656 | 7.56E-137 | 1.11E-132 |
| C06 | Rasgrp2     | 0.406  | 4.05E-133 | 5.96E-129 |
| C06 | Rbp1        | -0.443 | 8.23E-133 | 1.21E-128 |
| C06 | Ccnd2       | 0.408  | 2.17E-124 | 3.19E-120 |
| C06 | Adgrl4      | -0.415 | 1.03E-121 | 1.52E-117 |
| C06 | Hmgb3       | -0.495 | 2.77E-119 | 4.07E-115 |
| C06 | Calr        | -0.423 | 2.14E-108 | 3.15E-104 |
| C06 | Meis1       | -0.406 | 7.84E-105 | 1.15E-100 |
| C06 | Pbx1        | -0.509 | 3.77E-91  | 5.55E-87  |
| C06 | Cd79b       | 0.469  | 1.81E-90  | 2.66E-86  |
| C06 | Cd69        | 0.455  | 1.37E-85  | 2.01E-81  |
| C06 | Ms4a3       | -0.799 | 3.70E-81  | 5.45E-77  |
| C06 | Pf4         | -0.8   | 5.20E-76  | 7.65E-72  |

|     |         |        |           |           |
|-----|---------|--------|-----------|-----------|
| C06 | Mpo     | -1.072 | 8.31E-74  | 1.22E-69  |
| C06 | Pnp     | 0.544  | 1.87E-70  | 2.76E-66  |
| C06 | Mt1     | -0.556 | 1.73E-63  | 2.54E-59  |
| C06 | Ccl9    | -0.486 | 1.81E-58  | 2.67E-54  |
| C06 | Rgs1    | -0.425 | 2.47E-58  | 3.64E-54  |
| C06 | Chchd10 | 1.06   | 5.36E-49  | 7.89E-45  |
| C06 | Hbb-bt  | -0.907 | 1.27E-46  | 1.87E-42  |
| C06 | Dusp1   | -0.465 | 1.25E-42  | 1.83E-38  |
| C06 | Ctsg    | -1.139 | 2.29E-39  | 3.37E-35  |
| C06 | Elane   | -1.176 | 4.61E-35  | 6.79E-31  |
| C06 | Fos     | -0.626 | 2.64E-15  | 3.88E-11  |
| C08 | Vpreb1  | 2.766  | 0         | 0         |
| C08 | Igl1    | 2.647  | 0         | 0         |
| C08 | Ebf1    | 2.548  | 0         | 0         |
| C08 | Vpreb3  | 2.493  | 0         | 0         |
| C08 | Cd79a   | 2.251  | 0         | 0         |
| C08 | Mzb1    | 1.989  | 0         | 0         |
| C08 | Bfsp2   | 1.918  | 0         | 0         |
| C08 | Blnk    | 1.352  | 0         | 0         |
| C08 | Ly6d    | 1.085  | 0         | 0         |
| C08 | Id3     | 1.054  | 0         | 0         |
| C08 | Pde2a   | 0.976  | 0         | 0         |
| C08 | Cplx2   | 0.935  | 0         | 0         |
| C08 | Pax5    | 0.872  | 0         | 0         |
| C08 | Vpreb2  | 0.796  | 0         | 0         |
| C08 | Cecr2   | 0.779  | 0         | 0         |
| C08 | Pou2af1 | 0.757  | 0         | 0         |
| C08 | Slamf6  | 0.743  | 0         | 0         |
| C08 | Arl5c   | 0.721  | 0         | 0         |
| C08 | Il7r    | 0.707  | 0         | 0         |
| C08 | Cd19    | 0.706  | 0         | 0         |
| C08 | Akap12  | 0.696  | 0         | 0         |
| C08 | Sdc4    | 0.635  | 0         | 0         |
| C08 | Lef1    | 0.627  | 0         | 0         |
| C08 | Hes1    | 0.495  | 0         | 0         |
| C08 | Rnase12 | 0.487  | 0         | 0         |
| C08 | Gm37065 | 0.457  | 0         | 0         |
| C08 | Rag1    | 0.436  | 0         | 0         |
| C08 | Gfra2   | 0.426  | 0         | 0         |
| C08 | Dlg2    | 0.5    | 5.85E-306 | 8.62E-302 |
| C08 | Tmem108 | 0.479  | 5.96E-239 | 8.77E-235 |
| C08 | Cnn3    | 0.841  | 2.73E-215 | 4.01E-211 |
| C08 | Rras2   | 0.631  | 2.96E-214 | 4.36E-210 |

|     |            |        |           |           |
|-----|------------|--------|-----------|-----------|
| C08 | Atp1b1     | 0.421  | 3.17E-212 | 4.67E-208 |
| C08 | Gimap4     | 0.446  | 6.52E-192 | 9.59E-188 |
| C08 | Arpp21     | 0.463  | 7.92E-187 | 1.17E-182 |
| C08 | E2f2       | 0.477  | 2.60E-161 | 3.82E-157 |
| C08 | Bok        | 0.417  | 1.54E-149 | 2.26E-145 |
| C08 | Tifab      | 0.419  | 7.75E-149 | 1.14E-144 |
| C08 | Cd79b      | 1.397  | 5.40E-148 | 7.95E-144 |
| C08 | Chchd10    | 2.109  | 1.81E-146 | 2.66E-142 |
| C08 | Ets1       | 0.445  | 9.29E-143 | 1.37E-138 |
| C08 | Gtse1      | 0.463  | 4.65E-137 | 6.85E-133 |
| C08 | Dntt       | 1.314  | 4.18E-134 | 6.16E-130 |
| C08 | Tpm4       | 0.723  | 2.06E-132 | 3.03E-128 |
| C08 | Sapcd1     | 0.469  | 7.07E-124 | 1.04E-119 |
| C08 | Crip1      | 1.364  | 1.71E-120 | 2.51E-116 |
| C08 | Ptma       | 0.751  | 6.33E-119 | 9.31E-115 |
| C08 | Rrm2       | 1.098  | 9.83E-117 | 1.45E-112 |
| C08 | Ucp2       | 1.216  | 1.13E-116 | 1.67E-112 |
| C08 | Hmgb1      | 1.166  | 4.14E-116 | 6.09E-112 |
| C08 | Fam53b     | 0.855  | 5.53E-116 | 8.14E-112 |
| C08 | Marcks     | 0.458  | 9.96E-115 | 1.47E-110 |
| C08 | Ccnd3      | 1.301  | 1.79E-112 | 2.64E-108 |
| C08 | Lmo2       | -1.471 | 5.74E-112 | 8.44E-108 |
| C08 | 2810417H13 | 1.321  | 8.14E-110 | 1.20E-105 |
| C08 | Pkig       | 0.911  | 1.36E-105 | 2.00E-101 |
| C08 | Traf4      | 0.443  | 4.39E-98  | 6.47E-94  |
| C08 | Dck        | 0.665  | 2.44E-96  | 3.60E-92  |
| C08 | Snx2       | 0.928  | 1.28E-95  | 1.89E-91  |
| C08 | Pnp        | 1.028  | 2.83E-94  | 4.16E-90  |
| C08 | Prtn3      | -1.957 | 1.72E-93  | 2.53E-89  |
| C08 | Rasgrp2    | 0.921  | 4.09E-93  | 6.03E-89  |
| C08 | Lrmp       | 0.871  | 4.93E-90  | 7.26E-86  |
| C08 | Ppia       | 0.498  | 5.85E-90  | 8.61E-86  |
| C08 | Gmfg       | 0.658  | 5.06E-88  | 7.45E-84  |
| C08 | Ethe1      | 0.883  | 5.46E-88  | 8.03E-84  |
| C08 | Ifitm3     | -1.159 | 1.66E-87  | 2.45E-83  |
| C08 | Atp1b3     | 0.85   | 1.11E-86  | 1.63E-82  |
| C08 | Cd34       | -1.281 | 4.15E-86  | 6.11E-82  |
| C08 | Gpx1       | -0.762 | 6.88E-86  | 1.01E-81  |
| C08 | Myl4       | 0.519  | 7.01E-86  | 1.03E-81  |
| C08 | Ctla2a     | -1.492 | 9.83E-86  | 1.45E-81  |
| C08 | Ppp1ca     | 0.666  | 3.32E-85  | 4.89E-81  |
| C08 | Myl10      | 0.999  | 1.86E-84  | 2.74E-80  |
| C08 | Srgn       | -0.801 | 6.68E-83  | 9.83E-79  |



|     |            |        |          |          |
|-----|------------|--------|----------|----------|
| C08 | Hmgn2      | 0.715  | 7.78E-79 | 1.14E-74 |
| C08 | Asf1b      | 0.631  | 9.70E-79 | 1.43E-74 |
| C08 | Ifitm1     | -1.558 | 2.63E-78 | 3.87E-74 |
| C08 | Arpc5l     | 0.742  | 4.15E-78 | 6.11E-74 |
| C08 | Tifa       | 0.809  | 4.28E-78 | 6.31E-74 |
| C08 | Hmgb2      | 0.946  | 8.14E-78 | 1.20E-73 |
| C08 | H2afz      | 0.666  | 8.85E-78 | 1.30E-73 |
| C08 | Impdh1     | 0.606  | 2.66E-76 | 3.91E-72 |
| C08 | Hnrnpa3    | 0.639  | 1.49E-75 | 2.19E-71 |
| C08 | Pgls       | 0.598  | 2.27E-75 | 3.35E-71 |
| C08 | Rbm3       | 0.444  | 5.58E-74 | 8.22E-70 |
| C08 | Cdv3       | 0.837  | 5.75E-74 | 8.47E-70 |
| C08 | Vamp8      | -0.843 | 5.79E-74 | 8.53E-70 |
| C08 | Itm2b      | -0.663 | 6.41E-70 | 9.43E-66 |
| C08 | Dapp1      | -0.861 | 8.83E-70 | 1.30E-65 |
| C08 | Mgst2      | 0.454  | 4.22E-69 | 6.21E-65 |
| C08 | Uhrf1      | 0.648  | 4.51E-69 | 6.64E-65 |
| C08 | Anp32e     | 0.728  | 5.85E-69 | 8.62E-65 |
| C08 | Rab38      | -0.845 | 4.45E-68 | 6.55E-64 |
| C08 | Tmsb10     | 0.532  | 7.14E-68 | 1.05E-63 |
| C08 | Dut        | 0.651  | 1.92E-67 | 2.83E-63 |
| C08 | Cd63       | -1.11  | 1.58E-66 | 2.32E-62 |
| C08 | Gsn        | 0.66   | 5.09E-66 | 7.49E-62 |
| C08 | Alox5ap    | -0.784 | 1.31E-64 | 1.93E-60 |
| C08 | Tcf3       | 0.66   | 9.42E-64 | 1.39E-59 |
| C08 | Ezh2       | 0.722  | 1.02E-63 | 1.49E-59 |
| C08 | Emp3       | -0.7   | 1.43E-63 | 2.10E-59 |
| C08 | Creg1      | -0.78  | 4.01E-63 | 5.91E-59 |
| C08 | Pcna       | 0.759  | 1.26E-62 | 1.85E-58 |
| C08 | Lmnb1      | 0.696  | 3.48E-62 | 5.13E-58 |
| C08 | Cd52       | 0.728  | 3.85E-62 | 5.67E-58 |
| C08 | Ptp4a3     | 0.68   | 3.86E-62 | 5.68E-58 |
| C08 | 2900026A02 | 0.465  | 6.68E-62 | 9.83E-58 |
| C08 | Laptm5     | -0.694 | 7.65E-62 | 1.13E-57 |
| C08 | Cox5a      | 0.499  | 1.50E-61 | 2.21E-57 |
| C08 | Abli1      | 0.42   | 3.19E-61 | 4.69E-57 |
| C08 | Ptpre      | -0.769 | 9.33E-61 | 1.37E-56 |
| C08 | Ramp1      | -0.8   | 4.28E-60 | 6.29E-56 |
| C08 | Rgcc       | 0.514  | 4.47E-60 | 6.58E-56 |
| C08 | Cd24a      | 0.788  | 4.83E-60 | 7.11E-56 |
| C08 | Ly6e       | 0.539  | 6.05E-60 | 8.91E-56 |
| C08 | Prdx1      | 0.528  | 1.03E-59 | 1.51E-55 |
| C08 | AU020206   | 0.461  | 2.18E-59 | 3.21E-55 |

|     |           |        |          |          |
|-----|-----------|--------|----------|----------|
| C08 | Cdkn1a    | 0.463  | 2.28E-59 | 3.36E-55 |
| C08 | Smarca4   | 0.66   | 5.21E-59 | 7.68E-55 |
| C08 | Srsf3     | 0.468  | 7.95E-59 | 1.17E-54 |
| C08 | Rgs18     | -0.728 | 2.29E-58 | 3.38E-54 |
| C08 | Serpina3g | -0.926 | 2.73E-57 | 4.02E-53 |
| C08 | Glipr1    | -0.692 | 6.73E-57 | 9.90E-53 |
| C08 | Slbp      | 0.637  | 2.39E-56 | 3.52E-52 |
| C08 | Hnrnpa2b1 | 0.501  | 5.32E-56 | 7.84E-52 |
| C08 | Cd37      | 0.594  | 7.45E-56 | 1.10E-51 |
| C08 | Fbxo5     | 0.587  | 8.25E-56 | 1.21E-51 |
| C08 | Ranbp1    | 0.539  | 1.66E-55 | 2.44E-51 |
| C08 | Bin1      | 0.55   | 2.32E-55 | 3.41E-51 |
| C08 | Tmem176b  | -0.77  | 2.61E-55 | 3.84E-51 |
| C08 | Plekha2   | 0.469  | 1.68E-54 | 2.48E-50 |
| C08 | Ndufs5    | 0.532  | 2.30E-54 | 3.39E-50 |
| C08 | Lgals9    | 0.643  | 2.52E-54 | 3.71E-50 |
| C08 | Parp1     | 0.566  | 5.70E-54 | 8.40E-50 |
| C08 | Sae1      | 0.552  | 8.91E-54 | 1.31E-49 |
| C08 | Tuba1b    | 0.679  | 2.09E-53 | 3.08E-49 |
| C08 | Saraf     | -0.661 | 1.27E-52 | 1.87E-48 |
| C08 | Vamp5     | -0.825 | 6.29E-52 | 9.26E-48 |
| C08 | Ran       | 0.45   | 1.61E-51 | 2.36E-47 |
| C08 | Samsn1    | -0.707 | 3.97E-51 | 5.84E-47 |
| C08 | Ezr       | 0.516  | 4.03E-51 | 5.93E-47 |
| C08 | Srsf2     | 0.457  | 8.36E-51 | 1.23E-46 |
| C08 | Nkg7      | -0.918 | 1.10E-50 | 1.62E-46 |
| C08 | Tmem176a  | -0.677 | 2.23E-50 | 3.28E-46 |
| C08 | Malat1    | -0.767 | 4.78E-50 | 7.04E-46 |
| C08 | Tspan32   | -0.677 | 2.18E-49 | 3.21E-45 |
| C08 | Meis1     | -0.722 | 4.06E-49 | 5.97E-45 |
| C08 | Adgrl4    | -0.686 | 8.16E-48 | 1.20E-43 |
| C08 | Ppp1cb    | 0.526  | 1.61E-47 | 2.37E-43 |
| C08 | Gm26917   | 0.543  | 3.15E-47 | 4.64E-43 |
| C08 | Rcsd1     | 0.564  | 4.58E-47 | 6.74E-43 |
| C08 | Mif       | 0.543  | 6.79E-47 | 1.00E-42 |
| C08 | Hmgn1     | 0.524  | 1.86E-46 | 2.74E-42 |
| C08 | Tbc1d10c  | 0.502  | 2.10E-46 | 3.09E-42 |
| C08 | H2-DMa    | -0.631 | 3.19E-46 | 4.70E-42 |
| C08 | Ddx39     | 0.565  | 1.73E-45 | 2.54E-41 |
| C08 | Nfe2      | -0.58  | 3.99E-45 | 5.88E-41 |
| C08 | Angpt1    | -0.658 | 9.38E-45 | 1.38E-40 |
| C08 | Dnajc21   | 0.444  | 1.01E-44 | 1.48E-40 |
| C08 | Ifitm2    | -0.457 | 1.92E-44 | 2.82E-40 |

|     |           |        |          |          |
|-----|-----------|--------|----------|----------|
| C08 | Ccna2     | 0.542  | 2.16E-44 | 3.18E-40 |
| C08 | Fxyd5     | -0.551 | 2.60E-44 | 3.82E-40 |
| C08 | H2afv     | 0.544  | 3.35E-44 | 4.93E-40 |
| C08 | Cd27      | -0.632 | 1.02E-43 | 1.50E-39 |
| C08 | Dek       | 0.476  | 1.12E-43 | 1.65E-39 |
| C08 | Nasp      | 0.495  | 5.69E-43 | 8.38E-39 |
| C08 | Sipa1     | 0.429  | 3.97E-42 | 5.85E-38 |
| C08 | Dynll1    | 0.456  | 8.82E-42 | 1.30E-37 |
| C08 | Mki67     | 0.586  | 1.52E-41 | 2.23E-37 |
| C08 | Rabac1    | -0.505 | 2.01E-41 | 2.96E-37 |
| C08 | Tyms      | 0.633  | 2.24E-41 | 3.29E-37 |
| C08 | Myl12b    | -0.54  | 3.20E-41 | 4.71E-37 |
| C08 | Car2      | -1.081 | 6.41E-41 | 9.44E-37 |
| C08 | Lbr       | 0.463  | 7.27E-41 | 1.07E-36 |
| C08 | Tmpo      | 0.487  | 8.54E-41 | 1.26E-36 |
| C08 | Zfp36l2   | -0.605 | 1.10E-40 | 1.62E-36 |
| C08 | Slco3a1   | -0.554 | 3.01E-40 | 4.44E-36 |
| C08 | Pmf1      | 0.555  | 1.06E-39 | 1.57E-35 |
| C08 | Birc5     | 0.588  | 1.11E-39 | 1.64E-35 |
| C08 | Top2a     | 0.66   | 1.86E-39 | 2.74E-35 |
| C08 | Nhp211    | 0.423  | 2.13E-39 | 3.13E-35 |
| C08 | Gcnt2     | -0.593 | 2.89E-39 | 4.26E-35 |
| C08 | Spint2    | -0.527 | 3.59E-39 | 5.28E-35 |
| C08 | Siva1     | 0.437  | 3.97E-39 | 5.84E-35 |
| C08 | S100a11   | -0.558 | 6.21E-39 | 9.14E-35 |
| C08 | Ikzf2     | -0.569 | 2.81E-38 | 4.13E-34 |
| C08 | Hnrnpab   | 0.413  | 3.34E-38 | 4.91E-34 |
| C08 | Adrbk1    | 0.444  | 5.08E-38 | 7.47E-34 |
| C08 | Hlf       | -0.709 | 7.95E-38 | 1.17E-33 |
| C08 | Nrgn      | -0.614 | 1.60E-37 | 2.35E-33 |
| C08 | Baz1a     | 0.409  | 4.07E-37 | 5.99E-33 |
| C08 | Fcer1g    | -0.647 | 4.24E-37 | 6.24E-33 |
| C08 | Srsf7     | 0.426  | 6.38E-37 | 9.39E-33 |
| C08 | Prdx6     | -0.474 | 7.81E-37 | 1.15E-32 |
| C08 | Lgals1    | 0.657  | 1.36E-36 | 2.00E-32 |
| C08 | H2-Q7     | -0.629 | 1.61E-36 | 2.36E-32 |
| C08 | Hist1h2ap | 0.824  | 1.81E-36 | 2.66E-32 |
| C08 | Lockd     | 0.468  | 2.91E-36 | 4.29E-32 |
| C08 | Pbk       | 0.458  | 1.17E-35 | 1.73E-31 |
| C08 | Whsc1     | 0.425  | 2.14E-35 | 3.16E-31 |
| C08 | Tspan4    | -0.514 | 2.39E-35 | 3.52E-31 |
| C08 | Prdx4     | 0.474  | 3.03E-35 | 4.46E-31 |
| C08 | Rrm1      | 0.439  | 5.74E-35 | 8.46E-31 |

|     |             |        |          |          |
|-----|-------------|--------|----------|----------|
| C08 | Dnajc9      | 0.424  | 6.22E-35 | 9.15E-31 |
| C08 | Zyx         | -0.509 | 9.67E-35 | 1.42E-30 |
| C08 | Ppil1       | 0.444  | 1.17E-34 | 1.72E-30 |
| C08 | Cdca3       | 0.48   | 1.25E-34 | 1.84E-30 |
| C08 | Myct1       | -0.583 | 1.34E-34 | 1.97E-30 |
| C08 | Ube2s       | 0.523  | 3.36E-34 | 4.95E-30 |
| C08 | Cacybp      | 0.436  | 5.19E-34 | 7.65E-30 |
| C08 | Elof1       | 0.519  | 1.26E-33 | 1.86E-29 |
| C08 | Ccl9        | -0.884 | 6.36E-33 | 9.37E-29 |
| C08 | Lyar        | 0.451  | 9.43E-33 | 1.39E-28 |
| C08 | Anxa5       | -0.492 | 1.02E-32 | 1.51E-28 |
| C08 | Tyrobp      | -0.682 | 1.27E-32 | 1.86E-28 |
| C08 | Smc4        | 0.54   | 1.38E-31 | 2.03E-27 |
| C08 | Gata2       | -0.549 | 2.08E-31 | 3.07E-27 |
| C08 | Muc13       | -0.449 | 2.26E-31 | 3.33E-27 |
| C08 | Aldoa       | -0.53  | 3.22E-31 | 4.74E-27 |
| C08 | Sdsl        | -0.565 | 4.02E-31 | 5.91E-27 |
| C08 | Tspo        | -0.495 | 4.36E-31 | 6.42E-27 |
| C08 | Mrpl52      | -0.489 | 5.03E-31 | 7.40E-27 |
| C08 | Lig1        | 0.415  | 5.93E-31 | 8.73E-27 |
| C08 | Serpinb1a   | -0.561 | 7.01E-31 | 1.03E-26 |
| C08 | Wapl        | -0.42  | 7.39E-31 | 1.09E-26 |
| C08 | Pbx1        | -0.686 | 7.65E-31 | 1.13E-26 |
| C08 | Anxa2       | -0.435 | 7.82E-31 | 1.15E-26 |
| C08 | S100a1      | -0.442 | 1.68E-30 | 2.47E-26 |
| C08 | 4930519L02F | -0.466 | 3.03E-30 | 4.46E-26 |
| C08 | Smc2        | 0.439  | 6.43E-30 | 9.47E-26 |
| C08 | Nfic        | -0.45  | 9.16E-30 | 1.35E-25 |
| C08 | Pdcd4       | -0.548 | 1.18E-29 | 1.73E-25 |
| C08 | Lat2        | -0.463 | 1.20E-29 | 1.77E-25 |
| C08 | Fyb         | -0.488 | 1.46E-29 | 2.16E-25 |
| C08 | Cdk1        | 0.519  | 1.54E-29 | 2.27E-25 |
| C08 | Hells       | 0.417  | 1.70E-29 | 2.50E-25 |
| C08 | Bex6        | -0.493 | 3.30E-29 | 4.86E-25 |
| C08 | Gmnn        | 0.41   | 6.08E-29 | 8.95E-25 |
| C08 | Crlf2       | -0.478 | 9.07E-29 | 1.34E-24 |
| C08 | Akap13      | -0.475 | 1.09E-28 | 1.61E-24 |
| C08 | Emb         | -0.654 | 1.09E-28 | 1.61E-24 |
| C08 | Mpo         | -1.302 | 1.99E-28 | 2.93E-24 |
| C08 | Aldh2       | -0.452 | 7.30E-28 | 1.07E-23 |
| C08 | Cenpa       | 0.495  | 9.77E-28 | 1.44E-23 |
| C08 | Gclm        | -0.48  | 1.98E-27 | 2.92E-23 |
| C08 | Prr13       | -0.477 | 2.45E-27 | 3.60E-23 |

|     |          |        |          |            |
|-----|----------|--------|----------|------------|
| C08 | Skap2    | -0.41  | 7.37E-27 | 1.09E-22   |
| C08 | Krt18    | -0.455 | 2.13E-26 | 3.14E-22   |
| C08 | Ctsd     | -0.412 | 2.69E-26 | 3.97E-22   |
| C08 | Ctsg     | -1.592 | 2.94E-26 | 4.33E-22   |
| C08 | Tubb5    | 0.443  | 4.84E-26 | 7.13E-22   |
| C08 | Cpne2    | -0.427 | 4.97E-26 | 7.31E-22   |
| C08 | Txnip    | -0.671 | 7.56E-26 | 1.11E-21   |
| C08 | Pnrc1    | -0.49  | 2.32E-25 | 3.42E-21   |
| C08 | Ffar2    | -0.409 | 2.65E-25 | 3.90E-21   |
| C08 | Mettl7a1 | -0.434 | 3.23E-25 | 4.75E-21   |
| C08 | Bcl2     | -0.469 | 8.89E-25 | 1.31E-20   |
| C08 | Cited2   | -0.483 | 1.08E-24 | 1.59E-20   |
| C08 | Ssbp2    | -0.413 | 1.22E-24 | 1.79E-20   |
| C08 | Shisa5   | -0.452 | 1.67E-24 | 2.46E-20   |
| C08 | Apoe     | -0.974 | 2.86E-24 | 4.21E-20   |
| C08 | Ms4a6c   | -0.441 | 2.98E-24 | 4.39E-20   |
| C08 | Tsc22d1  | -0.548 | 5.45E-24 | 8.03E-20   |
| C08 | Nrip1    | -0.455 | 5.46E-24 | 8.03E-20   |
| C08 | Spi1     | -0.415 | 1.24E-23 | 1.83E-19   |
| C08 | Xist     | -1.504 | 1.25E-22 | 1.83E-18   |
| C08 | Gng11    | -0.417 | 1.65E-22 | 2.42E-18   |
| C08 | Ndrg1    | -0.412 | 1.90E-22 | 2.79E-18   |
| C08 | Capg     | -0.425 | 4.51E-22 | 6.64E-18   |
| C08 | Adgrg1   | -0.445 | 3.63E-21 | 5.34E-17   |
| C08 | Atpif1   | -0.408 | 5.04E-21 | 7.43E-17   |
| C08 | Lyz2     | -0.435 | 1.96E-20 | 2.89E-16   |
| C08 | Rgs1     | -0.592 | 5.59E-19 | 8.23E-15   |
| C08 | Wfdc17   | -0.756 | 3.63E-18 | 5.34E-14   |
| C08 | Cd9      | -0.424 | 1.30E-17 | 1.91E-13   |
| C08 | H2afx    | 0.511  | 6.66E-16 | 9.80E-12   |
| C08 | Hbb-bt   | -1.017 | 1.25E-14 | 1.84E-10   |
| C08 | Ms4a3    | -0.796 | 3.38E-14 | 4.97E-10   |
| C08 | Pf4      | -0.775 | 4.87E-12 | 7.17E-08   |
| C08 | Junb     | -0.539 | 9.15E-10 | 1.35E-05   |
| C08 | Ube2c    | 0.513  | 1.77E-09 | 2.61E-05   |
| C08 | Egr1     | -0.5   | 8.60E-09 | 1.27E-04   |
| C08 | Ccl4     | -0.406 | 1.10E-08 | 1.62E-04   |
| C08 | Elane    | -1.188 | 1.82E-08 | 2.68E-04   |
| C08 | Mt1      | -0.488 | 1.63E-07 | 0.00239264 |
| C08 | Fosb     | -0.49  | 2.59E-07 | 0.00381662 |
| C08 | Fos      | -1.188 | 5.14E-07 | 0.00756459 |
