# Supplementary material
Source: PubMed Central journal article supplement (PMC7376385)
Supplement: NIHMS1580322-supplement-SUPL__Table_6.pdf [file NIHMS1580322-supplement-SUPL__Table_6.pdf]

Table S6. Differential open chromatin sites in Spop KO and control LSK 10 days post-pi-C

| seqnames | start    | end      | width | Fold(KO/WT.p.value | FDR      | feature                              | external_gene | biotype | start_pos | end_pos  | position     | insideFeature | distanceToFeature | shortestDistance | FromOverlapping  |
|----------|----------|----------|-------|--------------------|----------|--------------------------------------|---------------|---------|-----------|----------|--------------|---------------|-------------------|------------------|------------------|
| chr1     | 4405626  | 4406117  | 492   | -1.14              | 0.00617  | 0.0293 ENSMUSG0000002590Rp1          | protein_codi  |         | 3999557   | 4409241  | inside       |               | 3369              | 3124             | shortestDistance |
| chr1     | 4414756  | 4415073  | 318   | 1.96               | 5.00E-06 | 9.19E-05 ENSMUSG0000002590Rp1        | protein_codi  |         | 3999557   | 4409241  | upstream     |               | -5673             | 5515             | shortestDistance |
| chr1     | 4433512  | 4433917  | 406   | -1.47              | 7.09E-05 | 0.00841 ENSMUSG0000002590Rp1         | protein_codi  |         | 3999557   | 4409241  | upstream     |               | -24473            | 24271            | shortestDistance |
| chr1     | 4481140  | 4481492  | 353   | -2.23              | 1.14E-06 | 2.63E-05 ENSMUSG0000002590Sox17      | protein_codi  |         | 4490931   | 4497354  | downstream   |               | 16038             | 9439             | shortestDistance |
| chr1     | 4490449  | 4490892  | 444   | -1.43              | 7.14E-06 | 0.00124 ENSMUSG0000002590Sox17       | protein_codi  |         | 4490931   | 4497354  | downstream   |               | 6684              | 39               | shortestDistance |
| chr1     | 4496065  | 4496893  | 829   | -1.5               | 6.94E-06 | 0.00121 ENSMUSG0000002590Sox17       | protein_codi  |         | 4490931   | 4497354  | inside       |               | 875               | 461              | shortestDistance |
| chr1     | 4571288  | 4572266  | 979   | -1.16              | 0.00114  | 0.00791 ENSMUSG0000010432Gm37323     | lincRNA       |         | 4583129   | 4586252  | downstream   |               | 14475             | 10863            | shortestDistance |
| chr1     | 4579604  | 4580078  | 475   | -1.52              | 0.000654 | 0.0051 ENSMUSG0000010432Gm37323      | lincRNA       |         | 4583129   | 4586252  | downstream   |               | 6411              | 3051             | shortestDistance |
| chr1     | 4623035  | 4623770  | 736   | -1.51              | 9.96E-05 | 0.00111 ENSMUSG0000010273Gm7369      | processed_p   |         | 4610471   | 4611406  | downstream   |               | 12931             | 11629            | shortestDistance |
| chr1     | 4669762  | 4669994  | 233   | -1.23              | 0.00288  | 0.0163 ENSMUSG0000009810Gm6085       | processed_p   |         | 4687934   | 4689403  | downstream   |               | 19525             | 17940            | shortestDistance |
| chr1     | 4746792  | 4747363  | 572   | -1.21              | 0.00019  | 0.0019 ENSMUSG0000010326Gm2053       | processed_p   |         | 4735046   | 4735676  | upstream     |               | -11402            | 11116            | shortestDistance |
| chr1     | 4747904  | 4748692  | 789   | -1.47              | 3.56E-06 | 6.88E-05 ENSMUSG0000010326Gm2053     | processed_p   |         | 4735046   | 4735676  | upstream     |               | -12622            | 12228            | shortestDistance |
| chr1     | 4918659  | 4919145  | 487   | -1.35              | 0.000318 | 0.00287 ENSMUSG0000000245Rgs20       | protein_codi  |         | 4909576   | 5070285  | inside       |               | 151383            | 9083             | shortestDistance |
| chr1     | 5019252  | 5019833  | 582   | -1.11              | 0.0015   | 0.00979 ENSMUSG0000000245Rgs20       | protein_codi  |         | 4909576   | 5070285  | inside       |               | 50743             | 50452            | shortestDistance |
| chr1     | 6222817  | 6223360  | 544   | -1.35              | 0.000562 | 0.00453 ENSMUSG0000002590Rb1cc1      | protein_codi  |         | 6206197   | 6276648  | inside       |               | 16891             | 16620            | shortestDistance |
| chr1     | 6244134  | 6244530  | 397   | -1.48              | 0.000387 | 0.00337 ENSMUSG0000002590Rb1cc1      | protein_codi  |         | 6206197   | 6276648  | inside       |               | 38135             | 32118            | shortestDistance |
| chr1     | 6282492  | 6282788  | 297   | -1.01              | 0.00929  | 0.0401 ENSMUSG0000002590Rb1cc1       | protein_codi  |         | 6206197   | 6276648  | downstream   |               | 76443             | 5844             | shortestDistance |
| chr1     | 6358839  | 6359591  | 753   | -1.87              | 7.43E-07 | 1.83E-05 ENSMUSG0000008724Alkal1     | protein_codi  |         | 6359218   | 6394731  | overlapStart |               | -3                | 373              | shortestDistance |
| chr1     | 6382657  | 6383298  | 642   | -0.96              | 0.00302  | 0.0169 ENSMUSG0000010270Gm7417       | processed_p   |         | 6382634   | 6383106  | overlapStart |               | 128               | 23               | shortestDistance |
| chr1     | 6406087  | 6406918  | 832   | -0.9               | 0.00441  | 0.0226 ENSMUSG0000008724Alkal1       | protein_codi  |         | 6359218   | 6394731  | downstream   |               | 47284             | 11356            | shortestDistance |
| chr1     | 6417930  | 6418240  | 311   | -1.16              | 0.00135  | 0.00907 ENSMUSG0000010384Gm19026     | processed_p   |         | 6429655   | 6441296  | downstream   |               | 23211             | 11415            | shortestDistance |
| chr1     | 6441130  | 6441817  | 688   | -0.96              | 0.0027   | 0.0155 ENSMUSG0000010384Gm19026      | processed_p   |         | 6429655   | 6441296  | overlapStart |               | -178              | 166              | shortestDistance |
| chr1     | 6859015  | 6859344  | 330   | -1.08              | 0.00389  | 0.0205 ENSMUSG0000003374St18         | protein_codi  |         | 6487231   | 6860940  | inside       |               | 371949            | 1596             | shortestDistance |
| chr1     | 7010225  | 7010486  | 262   | -1.52              | 0.000625 | 0.00493 ENSMUSG0000010221Gm37489     | processed_p   |         | 7013762   | 7013920  | upstream     |               | -3406             | 3276             | shortestDistance |
| chr1     | 7112920  | 7113279  | 378   | -1.78              | 6.84E-07 | 1.70E-05 ENSMUSG0000005128Pcmtd1     | protein_codi  |         | 7088920   | 7173628  | inside       |               | 24170             | 23982            | shortestDistance |
| chr1     | 7146847  | 7147413  | 567   | -1.38              | 6.04E-05 | 0.000741 ENSMUSG0000005128Pcmtd1     | protein_codi  |         | 7088920   | 7173628  | inside       |               | 58210             | 26215            | shortestDistance |
| chr1     | 7204777  | 7205087  | 311   | -0.84              | 0.0113   | 0.0465 ENSMUSG00000010370Nras-ps2    | processed_p   |         | 7189742   | 7189919  | upstream     |               | -15013            | 14858            | shortestDistance |
| chr1     | 7206059  | 7206987  | 929   | -1.18              | 0.000234 | 0.00224 ENSMUSG0000010370Nras-ps2    | processed_p   |         | 7189742   | 7189919  | upstream     |               | -16604            | 16140            | shortestDistance |
| chr1     | 7218963  | 7219277  | 315   | -1.71              | 5.17E-05 | 0.00649 ENSMUSG0000010370Nras-ps2    | processed_p   |         | 7189742   | 7189919  | upstream     |               | -29201            | 29044            | shortestDistance |
| chr1     | 7261562  | 7261978  | 417   | -1.63              | 0.000924 | 0.00669 ENSMUSG0000000724Gm23274     | snoRNA        |         | 7265803   | 7265932  | upstream     |               | -4033             | 3825             | shortestDistance |
| chr1     | 7777199  | 7777753  | 555   | -1.31              | 0.00174  | 0.009 ENSMUSG0000010355Gm38216       | processed_p   |         | 7728861   | 7730565  | upstream     |               | -46911            | 46634            | shortestDistance |
| chr1     | 8890209  | 8890607  | 399   | -1                 | 0.0119   | 0.0484 ENSMUSG0000002590Sntg1        | protein_codi  |         | 8361475   | 9299878  | inside       |               | 409470            | 409271           | shortestDistance |
| chr1     | 9237214  | 9237852  | 639   | -1.57              | 5.32E-05 | 0.000664 ENSMUSG0000002590Sntg1      | protein_codi  |         | 8361475   | 9299878  | inside       |               | 62345             | 62026            | shortestDistance |
| chr1     | 9629983  | 9630583  | 601   | -1.35              | 0.000206 | 0.00202 ENSMUSG00000079672610203C221 | processed_tr  |         | 9560832   | 9631175  | inside       |               | 892               | 592              | shortestDistance |
| chr1     | 9812844  | 9813320  | 477   | 1.04               | 0.00803  | 0.0359 ENSMUSG0000002591Sgk3         | protein_codi  |         | 9798107   | 9900845  | inside       |               | 14975             | 14737            | shortestDistance |
| chr1     | 9815776  | 9816179  | 404   | -1.27              | 0.000957 | 0.00689 ENSMUSG0000002591Sgk3        | protein_codi  |         | 9798107   | 9900845  | inside       |               | 17871             | 17669            | shortestDistance |
| chr1     | 9892927  | 9893667  | 741   | 1.57               | 0.000109 | 0.0012 ENSMUSG0000002591Sgk3         | protein_codi  |         | 9798107   | 9900845  | inside       |               | 95190             | 7178             | shortestDistance |
| chr1     | 9966693  | 9968484  | 1522  | -0.84              | 0.00565  | 0.0274 ENSMUSG0000010402E3300400141  | TEC           |         | 9967314   | 9968687  | overlapStart |               | 410               | 203              | shortestDistance |
| chr1     | 9983056  | 9983328  | 273   | 2.14               | 3.29E-05 | 0.000448 ENSMUSG0000000819Gm15818    | antisense_RI  |         | 9982387   | 9992366  | inside       |               | 805               | 669              | shortestDistance |
| chr1     | 10003284 | 10003582 | 299   | -1.38              | 0.00069  | 0.00533 ENSMUSG0000002591Ppp1r42     | protein_codi  |         | 9968624   | 10009136 | inside       |               | 5703              | 5554             | shortestDistance |
| chr1     | 10008846 | 10009361 | 516   | -0.98              | 0.0122   | 0.0492 ENSMUSG0000002591Ppp1r42      | protein_codi  |         | 9968624   | 10009136 | overlapStart |               | 32                | 225              | shortestDistance |
| chr1     | 10054200 | 10054648 | 449   | 0.94               | 0.0116   | 0.0474 ENSMUSG0000000567Csp1         | protein_codi  |         | 10037987  | 10136768 | inside       |               | 16437             | 16213            | shortestDistance |
| chr1     | 10210844 | 10211605 | 762   | -1.53              | 0.000107 | 0.00118 ENSMUSG0000006785Argef1      | protein_codi  |         | 10137571  | 10232670 | inside       |               | 21446             | 21065            | shortestDistance |
| chr1     | 10255179 | 10255837 | 659   | -1.72              | 9.39E-06 | 0.000157 ENSMUSG0000006785Argef1     | protein_codi  |         | 10137571  | 10232670 | upstream     |               | -22838            | 22509            | shortestDistance |
| chr1     | 10261021 | 10261838 | 638   | 1.46               | 0.000115 | 0.00125 ENSMUSG0000006785Argef1      | protein_codi  |         | 10137571  | 10232670 | upstream     |               | -28850            | 28531            | shortestDistance |
| chr1     | 10269183 | 10269523 | 341   | 1.51               | 0.000393 | 0.00342 ENSMUSG0000006785Argef1      | protein_codi  |         | 10137571  | 10232670 | upstream     |               | -36683            | 36513            | shortestDistance |
| chr1     | 10314827 | 10315216 | 390   | 2.95               | 2.00E-09 | 1.17E-07 ENSMUSG0000004255Cpa6       | protein_codi  |         | 10324720  | 10719945 | downstream   |               | 404923            | 9504             | shortestDistance |
| chr1     | 10453966 | 10454413 | 448   | -1.27              | 0.0013   | 0.0088 ENSMUSG0000004255Cpa6         | protein_codi  |         | 10324720  | 10719945 | inside       |               | 265755            | 129246           | shortestDistance |
| chr1     | 10488235 | 10488572 | 338   | -1.18              | 0.00219  | 0.0132 ENSMUSG0000004255Cpa6         | protein_codi  |         | 10324720  | 10719945 | inside       |               | 231541            | 163515           | shortestDistance |
| chr1     | 10494590 | 10494925 | 336   | -1.63              | 0.000114 | 0.00124 ENSMUSG0000004255Cpa6        | protein_codi  |         | 10324720  | 10719945 | inside       |               | 225187            | 169870           | shortestDistance |
| chr1     | 10699972 | 10700412 | 441   | -2.23              | 7.80E-08 | 2.69E-06 ENSMUSG0000004255Cpa6       | protein_codi  |         | 10324720  | 10719945 | inside       |               | 19753             | 19533            | shortestDistance |
| chr1     | 10769039 | 10769497 | 459   | -1.04              | 0.00274  | 0.0157 ENSMUSG0000010344Gm37133      | TEC           |         | 10782456  | 10784377 | downstream   |               | 15109             | 12959            | shortestDistance |
| chr1     | 10835698 | 10835990 | 293   | -1.47              | 6.25E-05 | 0.000761 ENSMUSG0000010021Gm5522     | processed_p   |         | 10805281  | 10806522 | downstream   |               | 30563             | 29176            | shortestDistance |
| chr1     | 10877395 | 10877777 | 383   | -1.2               | 0.000778 | 0.00585 ENSMUSG0000010064Gm28659     | processed_p   |         | 10868688  | 10869446 | downstream   |               | 8898              | 7949             | shortestDistance |
| chr1     | 10879903 | 10880773 | 871   | -0.86              | 0.00387  | 0.0204 ENSMUSG0000010064Gm28659      | processed_p   |         | 10868688  | 10869446 | downstream   |               | 11650             | 10457            | shortestDistance |
| chr1     | 10919235 | 10919595 | 361   | -1.95              | 0.000115 | 0.00125 ENSMUSG0000008858Gm22963     | snoRNA        |         | 10921670  | 10921760 | upstream     |               | -2255             | 2075             | shortestDistance |
| chr1     | 10943019 | 10943449 | 431   | -1.57              | 1.46E-05 | 0.000228 ENSMUSG0000008858Gm22963    | snoRNA        |         | 10921670  | 10921760 | downstream   |               | 21564             | 21259            | shortestDistance |
| chr1     | 10952578 | 10953005 | 428   | -2.11              | 9.13E-06 | 0.000153 ENSMUSG0000008858Gm22963    | snoRNA        |         | 10921670  | 10921760 | downstream   |               | 31122             | 30818            | shortestDistance |
| chr1     | 10990782 | 10991297 | 516   | -1.05              | 0.00145  | 0.00956 ENSMUSG0000004896Prex2       | protein_codi  |         | 10993465  | 11303368 | upstream     |               | -2425             | 2168             | shortestDistance |
| chr1     | 10993160 | 10994093 | 934   | -1.44              | 7.52E-05 | 0.000881 ENSMUSG0000004896Prex2      | protein_codi  |         | 10993465  | 11303368 | overlapStart |               | 161               | 305              | shortestDistance |
| chr1     | 10994271 | 10994474 | 204   | -1.7               | 4.56E-06 | 8.50E-05 ENSMUSG0000004896Prex2      | protein_codi  |         | 10993465  | 11303368 | inside       |               | 907               | 806              | shortestDistance |
| chr1     | 11001547 | 11001846 | 300   | -1.32              | 0.00123  | 0.00841 ENSMUSG0000004896Prex2       | protein_codi  |         | 10993465  | 11303368 | inside       |               | 8231              | 8082             | shortestDistance |
| chr1     | 11065203 | 11065673 | 471   | -1.37              | 6.09E-05 | 0.000745 ENSMUSG0000004896Prex2      | protein_codi  |         | 10993465  | 11303368 | inside       |               | 71973             | 71738            | shortestDistance |
| chr1     | 11097285 | 11097590 | 306   | -1.49              | 0.00102  | 0.00722 ENSMUSG0000004896Prex2       | protein_codi  |         | 10993465  | 11303368 | inside       |               | 103973            | 103820           | shortestDistance |
| chr1     | 11139976 | 11140254 | 279   | -1.22              | 0.00318  | 0.0176 ENSMUSG0000004896Prex2        | protein_codi  |         | 10993465  | 11303368 | inside       |               | 146650            | 146511           | shortestDistance |
| chr1     | 11228688 | 11229923 | 1236  | -1.27              | 0.000186 | 0.00187 ENSMUSG0000004896Prex2       | protein_codi  |         | 10993465  | 11303368 | inside       |               | 235841            | 73758            | shortestDistance |
| chr1     | 11272079 | 11272333 | 255   | -1.92              | 1.42E-05 | 0.000222 ENSMUSG0000004896Prex2      | protein_codi  |         | 10993465  | 11303368 | inside       |               | 278741            | 31348            | shortestDistance |
| chr1     | 11292601 | 11292961 | 702   | -1.78              | 2.46E-07 | 7.18E-06 ENSMUSG0000004896Prex2      | protein_codi  |         | 10993465  | 11303368 | downstream   |               | 336145            | 25579            | shortestDistance |
| chr1     | 11330316 | 11330601 | 286   | -1.9               | 1.28E-06 | 2.88E-05 ENSMUSG0000004896Prex2      | protein_codi  |         | 10993465  | 11303368 | downstream   |               | 336993            | 26635            | shortestDistance |
| chr1     | 11351316 | 11351638 | 503   | -1.93              | 4.60E-07 | 1.22E-05 ENSMUSG0000010349Gm37410    | TEC           |         | 11363926  | 11366964 | downstream   |               | 15577             | 12288            | shortestDistance |
| chr1     | 11413878 | 11414626 | 749   | -1.36              | 1.08E-05 | 0.000176 ENSMUSG0000000571A830018161 | protein_codi  |         | 11414105  | 11975901 | overlapStart |               | 147               | 227              | shortestDistance |
| chr1     | 11570290 | 11570620 | 331   | -1.06              | 0.0122   | 0.0493 ENSMUSG0000005071A8           |               |         |           |          |              |               |                   |                  |                  |

|      |          |          |      |       |          |          |                   |             |                |          |          |              |        |        |                  |
|------|----------|----------|------|-------|----------|----------|-------------------|-------------|----------------|----------|----------|--------------|--------|--------|------------------|
| chr1 | 15621961 | 15622189 | 229  | -1.06 | 0.00567  | 0.0275   | ENSMUSG0000009208 | Kcnb2       | protein_codi   | 15287254 | 15723750 | inside       | 334821 | 101561 | shortestDistance |
| chr1 | 15678985 | 15679198 | 214  | -2.48 | 4.90E-05 | 0.000621 | ENSMUSG0000009208 | Kcnb2       | protein_codi   | 15287254 | 15723750 | inside       | 391838 | 44552  | shortestDistance |
| chr1 | 15798956 | 15799369 | 414  | -2.51 | 2.17E-07 | 6.44E-06 | ENSMUSG0000002592 | Terf1       | protein_codi   | 15805646 | 15844052 | upstream     | -6484  | 6277   | shortestDistance |
| chr1 | 15883080 | 15883923 | 844  | -1.45 | 3.39E-05 | 0.000459 | ENSMUSG0000003271 | Sbspon      | protein_codi   | 15853862 | 15892722 | inside       | 9220   | 8799   | shortestDistance |
| chr1 | 15892404 | 15893104 | 701  | -1.49 | 1.82E-05 | 0.000273 | ENSMUSG0000003271 | Sbspon      | protein_codi   | 15853862 | 15892722 | overlapStart | -32    | 318    | shortestDistance |
| chr1 | 16092845 | 16093545 | 701  | -0.99 | 0.00407  | 0.0213   | ENSMUSG0000006779 | 49304444P10 | protein_codi   | 16065979 | 16093325 | overlapStart | 130    | 220    | shortestDistance |
| chr1 | 16161390 | 16162154 | 765  | 2.15  | 1.22E-06 | 2.78E-05 | ENSMUSG0000002592 | Rhd10       | protein_codi   | 16105774 | 16133734 | downstream   | 55998  | 27656  | shortestDistance |
| chr1 | 16177576 | 16178025 | 450  | -1.12 | 0.00852  | 0.0376   | ENSMUSG0000010416 | Gm38249     | TEC            | 16208197 | 16210517 | downstream   | 32717  | 30172  | shortestDistance |
| chr1 | 16219888 | 16220585 | 698  | 1.4   | 6.31E-05 | 0.000768 | ENSMUSG0000010086 | Gm28095     | antisense_RI   | 16228506 | 16244062 | upstream     | -8270  | 7921   | shortestDistance |
| chr1 | 16440062 | 16440555 | 494  | -0.9  | 0.00952  | 0.0409   | ENSMUSG0000002592 | Stau2       | protein_codi   | 16228674 | 16520112 | inside       | 79804  | 79557  | shortestDistance |
| chr1 | 16504980 | 16505283 | 304  | -1.42 | 0.00117  | 0.00808  | ENSMUSG0000002592 | Stau2       | protein_codi   | 16228674 | 16520112 | inside       | 14980  | 14829  | shortestDistance |
| chr1 | 16519614 | 16520170 | 557  | -0.88 | 0.00467  | 0.0236   | ENSMUSG0000002592 | Stau2       | protein_codi   | 16228674 | 16520112 | overlapStart | 220    | 58     | shortestDistance |
| chr1 | 16533989 | 16534659 | 671  | -1.51 | 0.000122 | 0.00131  | ENSMUSG0000002593 | Ube2w       | protein_codi   | 16540790 | 16619489 | downstream   | 85165  | 6131   | shortestDistance |
| chr1 | 16540171 | 16540993 | 823  | -1.9  | 2.54E-06 | 5.17E-05 | ENSMUSG0000002593 | Ube2w       | protein_codi   | 16540790 | 16619489 | overlapEnd   | 78907  | 203    | shortestDistance |
| chr1 | 16664905 | 16665961 | 1057 | -0.77 | 0.00985  | 0.042    | ENSMUSG0000002594 | Tmem70      | protein_codi   | 16665207 | 16678275 | overlapStart | 226    | 302    | shortestDistance |
| chr1 | 16758530 | 16759395 | 866  | -1.03 | 0.00573  | 0.0277   | ENSMUSG0000010009 | Gm29649     | processed_p    | 16758205 | 16758623 | overlapStart | -339   | 93     | shortestDistance |
| chr1 | 16809350 | 16809773 | 424  | -1.29 | 0.000508 | 0.00418  | ENSMUSG0000000910 | Gm5828      | processed_p    | 16768279 | 16770138 | upstream     | -39424 | 39212  | shortestDistance |
| chr1 | 16942516 | 16942769 | 254  | -1.5  | 0.000589 | 0.0047   | ENSMUSG0000010164 | Gm28376     | antisense_RI   | 16898185 | 17091631 | inside       | 44457  | 44331  | shortestDistance |
| chr1 | 17033576 | 17034310 | 735  | -1.56 | 1.51E-05 | 0.000233 | ENSMUSG0000004268 | Jph1        | protein_codi   | 16964560 | 17097889 | inside       | 63946  | 63579  | shortestDistance |
| chr1 | 17096702 | 17098188 | 1487 | -0.89 | 0.00454  | 0.0231   | ENSMUSG0000004268 | Jph1        | protein_codi   | 16964560 | 17097889 | overlapStart | 444    | 299    | shortestDistance |
| chr1 | 17123233 | 17123913 | 681  | -0.88 | 0.0114   | 0.0469   | ENSMUSG0000010011 | Gm28783     | lincRNA        | 17124747 | 17128956 | upstream     | -1174  | 834    | shortestDistance |
| chr1 | 17163571 | 17164066 | 496  | -1.3  | 0.000424 | 0.00362  | ENSMUSG0000002577 | Gdapl1      | protein_codi   | 17145362 | 17164271 | inside       | 18456  | 205    | shortestDistance |
| chr1 | 17348299 | 17348788 | 490  | -1.21 | 0.00256  | 0.0149   | ENSMUSG0000010039 | Gm5251      | processed_p    | 17394958 | 17395429 | upstream     | -46414 | 46170  | shortestDistance |
| chr1 | 17629439 | 17629887 | 449  | -0.98 | 0.00963  | 0.0412   | ENSMUSG0000010005 | Gm28154     | antisense_RI   | 17615084 | 17641081 | inside       | 11418  | 11194  | shortestDistance |
| chr1 | 17717597 | 17718329 | 733  | -1.35 | 0.00105  | 0.00739  | ENSMUSG0000008512 | Gm16070     | antisense_RI   | 17676027 | 17727646 | inside       | 9683   | 9317   | shortestDistance |
| chr1 | 17718459 | 17718871 | 413  | -1.9  | 8.24E-06 | 0.00014  | ENSMUSG0000008512 | Gm16070     | antisense_RI   | 17676027 | 17727646 | inside       | 8981   | 8775   | shortestDistance |
| chr1 | 17726798 | 17728046 | 1249 | -1.99 | 8.16E-09 | 3.91E-07 | ENSMUSG0000002577 | Crispld1    | protein_codi   | 17727045 | 17766344 | overlapStart | 377    | 247    | shortestDistance |
| chr1 | 17904556 | 17904972 | 417  | -2.33 | 2.56E-09 | 1.44E-07 | ENSMUSG0000010055 | Gm7690      | processed_p    | 17947041 | 17948439 | upstream     | -42277 | 42069  | shortestDistance |
| chr1 | 17944686 | 17944903 | 218  | -2.18 | 1.84E-05 | 0.000276 | ENSMUSG0000002593 | Gm7690      | processed_p    | 17947041 | 17948439 | upstream     | -2247  | 2138   | shortestDistance |
| chr1 | 17980673 | 17980965 | 293  | -1.13 | 0.00194  | 0.012    | ENSMUSG0000009947 | Gm18775     | transcribed_i  | 17993010 | 17999622 | downstream   | 18803  | 12045  | shortestDistance |
| chr1 | 18012908 | 18013349 | 442  | -1.12 | 0.00347  | 0.0188   | ENSMUSG0000010200 | Gm28755     | unprocessed    | 18005961 | 18016186 | inside       | 3058   | 2837   | shortestDistance |
| chr1 | 18057885 | 18058953 | 1069 | -1.01 | 0.00695  | 0.0322   | ENSMUSG0000010988 | Gm28756     | processed_tr   | 17994462 | 18059056 | inside       | 637    | 103    | shortestDistance |
| chr1 | 18106796 | 18107199 | 404  | -1.03 | 0.00342  | 0.0186   | ENSMUSG0000002577 | Crisp4      | protein_codi   | 18115191 | 18145902 | downstream   | 38904  | 7992   | shortestDistance |
| chr1 | 18279070 | 18279390 | 321  | -1.51 | 0.000115 | 0.00125  | ENSMUSG0000006777 | Defb41      | protein_codi   | 18250980 | 18265138 | upstream     | -14092 | 13932  | shortestDistance |
| chr1 | 18288912 | 18289225 | 314  | -1.36 | 0.000104 | 0.00115  | ENSMUSG0000006777 | Defb41      | protein_codi   | 18250980 | 18265138 | upstream     | -23930 | 23774  | shortestDistance |
| chr1 | 18360015 | 18360283 | 269  | -1.11 | 0.00268  | 0.0154   | ENSMUSG0000006777 | Defb41      | protein_codi   | 18250980 | 18265138 | upstream     | -95011 | 94877  | shortestDistance |
| chr1 | 19178867 | 19179371 | 505  | -1.39 | 5.83E-05 | 0.000718 | ENSMUSG0000004259 | Tfap2b      | protein_codi   | 19103022 | 19166346 | downstream   | 76097  | 12521  | shortestDistance |
| chr1 | 19209777 | 19210937 | 1161 | -0.93 | 0.00724  | 0.0331   | ENSMUSG0000002592 | Tfap2b      | protein_codi   | 19208914 | 19238576 | inside       | 1443   | 863    | shortestDistance |
| chr1 | 20311529 | 20311833 | 305  | -1.4  | 0.000472 | 0.00395  | ENSMUSG0000004376 | Pkh1d1      | protein_codi   | 20057779 | 20618064 | inside       | 306383 | 253750 | shortestDistance |
| chr1 | 20554268 | 20554747 | 480  | -1.24 | 0.000577 | 0.00462  | ENSMUSG0000004376 | Pkh1d1      | protein_codi   | 20057779 | 20618064 | inside       | 63556  | 63317  | shortestDistance |
| chr1 | 20748571 | 20748961 | 391  | -2.06 | 2.16E-07 | 6.43E-06 | ENSMUSG0000002592 | 117a        | protein_codi   | 20730905 | 20734496 | downstream   | 17861  | 14075  | shortestDistance |
| chr1 | 20890293 | 20891462 | 1170 | -0.79 | 0.0106   | 0.0444   | ENSMUSG0000002593 | Paq8        | protein_codi   | 20890606 | 20939650 | overlapStart | 272    | 313    | shortestDistance |
| chr1 | 20908636 | 20908989 | 354  | -1.23 | 0.00162  | 0.00825  | ENSMUSG0000002593 | Paq8        | protein_codi   | 20890606 | 20939650 | inside       | 18206  | 18030  | shortestDistance |
| chr1 | 20912159 | 20912967 | 809  | -0.96 | 0.00713  | 0.0327   | ENSMUSG0000002593 | Paq8        | protein_codi   | 20890606 | 20939650 | inside       | 21957  | 21553  | shortestDistance |
| chr1 | 20928485 | 20929134 | 650  | -0.94 | 0.00228  | 0.0136   | ENSMUSG0000002593 | Paq8        | protein_codi   | 20890606 | 20939650 | inside       | 38204  | 10516  | shortestDistance |
| chr1 | 20940127 | 20940497 | 371  | -1.05 | 0.00853  | 0.0376   | ENSMUSG0000002593 | Paq8        | protein_codi   | 20890606 | 20939650 | downstream   | 49706  | 477    | shortestDistance |
| chr1 | 20951153 | 20952133 | 981  | -0.86 | 0.00948  | 0.0408   | ENSMUSG0000004183 | Ehf1c       | protein_codi   | 20951626 | 20990841 | overlapStart | 17     | 473    | shortestDistance |
| chr1 | 21089510 | 21089942 | 433  | -1.07 | 0.0072   | 0.033    | ENSMUSG0000009997 | Gm28287     | antisense_RI   | 21080114 | 21081748 | downstream   | 9612   | 7762   | shortestDistance |
| chr1 | 21101127 | 21101586 | 460  | -0.92 | 0.00538  | 0.0264   | ENSMUSG0000002803 | Kcnq5       | antisense_RI   | 21080114 | 21081748 | downstream   | 21242  | 19379  | shortestDistance |
| chr1 | 21101697 | 21102022 | 326  | -1.98 | 1.32E-07 | 4.19E-06 | ENSMUSG0000009997 | Gm28287     | antisense_RI   | 21080114 | 21081748 | downstream   | 21746  | 19949  | shortestDistance |
| chr1 | 21192398 | 21192912 | 515  | -1.23 | 0.00067  | 0.0052   | ENSMUSG0000010081 | Gm2693      | unprocessed    | 21178988 | 21187427 | downstream   | 13667  | 4971   | shortestDistance |
| chr1 | 21218314 | 21218991 | 678  | -1.01 | 0.000896 | 0.00653  | ENSMUSG0000002593 | Tmem14a     | protein_codi   | 21218575 | 21230167 | overlapStart | 77     | 261    | shortestDistance |
| chr1 | 21271308 | 21271781 | 510  | -1.24 | 0.000485 | 0.00403  | ENSMUSG0000009934 | Gm28836     | antisense_RI   | 21250359 | 21271593 | overlapStart | 31     | 224    | shortestDistance |
| chr1 | 21335622 | 21336222 | 601  | -1.42 | 3.64E-05 | 0.000486 | ENSMUSG0000006775 | Khdc1a      | protein_codi   | 21349641 | 21352200 | upstream     | -13719 | 13419  | shortestDistance |
| chr1 | 21411249 | 21411829 | 581  | -1.33 | 5.44E-05 | 0.000678 | ENSMUSG0000002803 | Kcnq5       | protein_codi   | 21398403 | 21961942 | inside       | 550403 | 12846  | shortestDistance |
| chr1 | 21460962 | 21461838 | 877  | -1.32 | 9.95E-05 | 0.00111  | ENSMUSG0000002803 | Kcnq5       | protein_codi   | 21398403 | 21961942 | inside       | 500542 | 62559  | shortestDistance |
| chr1 | 21543962 | 21544357 | 396  | -1.71 | 3.71E-05 | 0.000494 | ENSMUSG0000002803 | Kcnq5       | protein_codi   | 21398403 | 21961942 | inside       | 417782 | 145559 | shortestDistance |
| chr1 | 21554530 | 21555275 | 746  | -0.95 | 0.00435  | 0.0224   | ENSMUSG0000002803 | Kcnq5       | protein_codi   | 21398403 | 21961942 | inside       | 407040 | 156127 | shortestDistance |
| chr1 | 21618564 | 21619249 | 686  | -1.92 | 4.01E-09 | 2.11E-07 | ENSMUSG0000002803 | Kcnq5       | protein_codi   | 21398403 | 21961942 | inside       | 343036 | 220161 | shortestDistance |
| chr1 | 21829583 | 21830635 | 1053 | -1.45 | 1.30E-05 | 0.000205 | ENSMUSG0000002803 | Kcnq5       | protein_codi   | 21398403 | 21961942 | inside       | 318383 | 131307 | shortestDistance |
| chr1 | 21836291 | 21836800 | 510  | -1.82 | 7.39E-07 | 1.82E-05 | ENSMUSG0000002803 | Kcnq5       | protein_codi   | 21398403 | 21961942 | inside       | 125396 | 125142 | shortestDistance |
| chr1 | 21891947 | 21892296 | 350  | -1.72 | 0.000151 | 0.00156  | ENSMUSG0000002803 | Kcnq5       | protein_codi   | 21398403 | 21961942 | inside       | 69820  | 69646  | shortestDistance |
| chr1 | 21963145 | 21963403 | 259  | -1.71 | 2.46E-06 | 5.02E-05 | ENSMUSG0000009971 | Gm26580     | lincRNA        | 21959842 | 21962530 | downstream   | 3432   | 615    | shortestDistance |
| chr1 | 21963482 | 21963861 | 380  | -1.59 | 1.18E-05 | 0.00019  | ENSMUSG0000009971 | Gm26580     | lincRNA        | 21959842 | 21962530 | downstream   | 3830   | 952    | shortestDistance |
| chr1 | 21974046 | 21974414 | 369  | -1    | 0.0084   | 0.0372   | ENSMUSG0000009971 | Gm26580     | lincRNA        | 21959842 | 21962530 | downstream   | 14388  | 11516  | shortestDistance |
| chr1 | 21981167 | 21981374 | 208  | -1.24 | 0.00764  | 0.0345   | ENSMUSG0000009971 | Gm26580     | lincRNA        | 21959842 | 21962530 | downstream   | 21428  | 18637  | shortestDistance |
| chr1 | 22105568 | 22105840 | 273  | -1.43 | 0.000158 | 0.00163  | ENSMUSG0000009969 | Gm5696      | processed_p    | 22030064 | 22030615 | upstream     | -75089 | 74953  | shortestDistance |
| chr1 | 22254166 | 22254697 | 530  | -1.17 | 0.000426 | 0.00364  | ENSMUSG0000010041 | Gm28239     | processed_p    | 22237849 | 22238295 | downstream   | 16583  | 17853  | shortestDistance |
| chr1 | 22269002 | 22269324 | 323  | -1.17 | 0.00202  | 0.0124   | ENSMUSG0000004167 | Rims1       | protein_codi   | 22286251 | 22805994 | downstream   | 536831 | 16927  | shortestDistance |
| chr1 | 22805545 | 22806482 | 938  | -1.2  | 0.000272 | 0.00253  | ENSMUSG0000004167 | Rims1       | protein_codi   | 22286251 | 22805994 | overlapStart | -20    | 449    | shortestDistance |
| chr1 | 23062040 | 23062390 | 351  | -1.07 | 0.00277  | 0.0158   | ENSMUSG0000010122 | Gm29506     | sense_overla</ |          |          |              |        |        |                  |

|      |           |          |      |       |          |          |                    |            |              |          |          |              |         |        |                  |
|------|-----------|----------|------|-------|----------|----------|--------------------|------------|--------------|----------|----------|--------------|---------|--------|------------------|
| chr1 | 31323275  | 31323585 | 311  | -1.66 | 7.01E-05 | 0.000835 | ENSMUSG00000009421 | Gm6489     | processed_p  | 31286945 | 31287640 | downstream   | 36485   | 35635  | shortestDistance |
| chr1 | 31538166  | 31538570 | 405  | -1.25 | 0.00226  | 0.0135   | ENSMUSG0000010109  | Gm10307    | processed_p  | 31559540 | 31561400 | upstream     | -21172  | 20970  | shortestDistance |
| chr1 | 32172337  | 32173182 | 846  | -1    | 0.00301  | 0.0169   | ENSMUSG0000002605  | Khp4b52    | protein_codi | 32172714 | 32658568 | overlapStart | 46      | 377    | shortestDistance |
| chr1 | 32965049  | 32965352 | 304  | -1.86 | 4.22E-05 | 0.000549 | ENSMUSG0000010292  | Gm37151    | TEC          | 32967484 | 32972490 | downstream   | 7290    | 2132   | shortestDistance |
| chr1 | 33022879  | 33023201 | 323  | -1.39 | 0.00073  | 0.00556  | ENSMUSG0000010049  | Gm28624    | processed_p  | 33028160 | 33030290 | downstream   | 7250    | 4959   | shortestDistance |
| chr1 | 33395751  | 33396205 | 455  | -1.1  | 0.00411  | 0.0214   | ENSMUSG0000010161  | Gm7933     | processed_p  | 33371331 | 33373585 | downstream   | 24647   | 22166  | shortestDistance |
| chr1 | 33502759  | 33503368 | 610  | -0.86 | 0.0121   | 0.049    | ENSMUSG0000002613  | Prim2      | protein_codi | 33453810 | 33669795 | inside       | 166731  | 48949  | shortestDistance |
| chr1 | 33503517  | 33503888 | 372  | -1.14 | 0.00211  | 0.0128   | ENSMUSG0000002613  | Prim2      | protein_codi | 33453810 | 33669795 | inside       | 166093  | 49707  | shortestDistance |
| chr1 | 33584256  | 33584550 | 295  | 1.45  | 0.00144  | 0.00949  | ENSMUSG0000002613  | Prim2      | protein_codi | 33453810 | 33669795 | inside       | 85392   | 85245  | shortestDistance |
| chr1 | 33647236  | 33647506 | 271  | -2.35 | 1.52E-07 | 4.75E-06 | ENSMUSG0000002613  | Prim2      | protein_codi | 33453810 | 33669795 | inside       | 22424   | 22289  | shortestDistance |
| chr1 | 33647730  | 33648004 | 275  | -1.73 | 1.71E-05 | 0.000259 | ENSMUSG0000002613  | Prim2      | protein_codi | 33453810 | 33669795 | inside       | 21928   | 21791  | shortestDistance |
| chr1 | 33719695  | 33720515 | 821  | -0.83 | 0.00637  | 0.0301   | ENSMUSG0000000476  | Rab23      | protein_codi | 33719887 | 33742564 | overlapStart | 218     | 192    | shortestDistance |
| chr1 | 33733081  | 33733393 | 313  | 1.99  | 5.90E-05 | 0.000726 | ENSMUSG0000000476  | Rab23      | protein_codi | 33719887 | 33742564 | inside       | 13350   | 9171   | shortestDistance |
| chr1 | 33742906  | 33743173 | 268  | -1.08 | 0.00202  | 0.0124   | ENSMUSG0000000476  | Rab23      | protein_codi | 33719887 | 33742564 | downstream   | 23153   | 342    | shortestDistance |
| chr1 | 33768747  | 33769192 | 446  | -1.19 | 0.000705 | 0.00542  | ENSMUSG00000004219 | Zfp451     | protein_codi | 33761545 | 33814595 | inside       | 45625   | 7202   | shortestDistance |
| chr1 | 33788080  | 33788442 | 363  | -1.34 | 0.000365 | 0.00322  | ENSMUSG00000004219 | Zfp451     | protein_codi | 33761545 | 33814595 | inside       | 26334   | 26153  | shortestDistance |
| chr1 | 33797909  | 33798119 | 211  | -1.12 | 0.00824  | 0.0367   | ENSMUSG00000004219 | Zfp451     | protein_codi | 33761545 | 33814595 | inside       | 16581   | 16476  | shortestDistance |
| chr1 | 33908994  | 33909542 | 549  | -0.85 | 0.01     | 0.0425   | ENSMUSG0000002613  | Dst        | protein_codi | 33908225 | 34308661 | inside       | 1043    | 769    | shortestDistance |
| chr1 | 33964655  | 33965062 | 408  | -1.18 | 0.000375 | 0.00329  | ENSMUSG0000002613  | Dst        | protein_codi | 33908225 | 34308661 | inside       | 56633   | 56430  | shortestDistance |
| chr1 | 34005581  | 34006667 | 1087 | -1    | 0.00122  | 0.00835  | ENSMUSG0000002613  | Dst        | protein_codi | 33908225 | 34308661 | inside       | 97899   | 97356  | shortestDistance |
| chr1 | 34021504  | 34022539 | 1036 | -1.69 | 2.37E-06 | 4.87E-05 | ENSMUSG0000002613  | Dst        | protein_codi | 33908225 | 34308661 | inside       | 113797  | 113279 | shortestDistance |
| chr1 | 34060616  | 34061489 | 874  | -0.89 | 0.00676  | 0.0315   | ENSMUSG0000002613  | Dst        | protein_codi | 33908225 | 34308661 | inside       | 152827  | 152391 | shortestDistance |
| chr1 | 34070479  | 34070860 | 382  | -1.67 | 7.03E-06 | 0.000123 | ENSMUSG0000002613  | Dst        | protein_codi | 33908225 | 34308661 | inside       | 162445  | 162254 | shortestDistance |
| chr1 | 341330820 | 34131064 | 245  | -1.29 | 0.00389  | 0.0205   | ENSMUSG0000002613  | Dst        | protein_codi | 33908225 | 34308661 | inside       | 222717  | 177597 | shortestDistance |
| chr1 | 34195332  | 34195591 | 260  | -1.58 | 0.0015   | 0.00981  | ENSMUSG0000002613  | Dst        | protein_codi | 33908225 | 34308661 | inside       | 287237  | 113070 | shortestDistance |
| chr1 | 34388887  | 34389948 | 1062 | -1.28 | 0.00732  | 0.0334   | ENSMUSG0000010120  | Gm5266     | processed_p  | 34367371 | 34369003 | downstream   | 22047   | 19884  | shortestDistance |
| chr1 | 34497044  | 34497381 | 338  | 1.91  | 4.52E-05 | 0.000581 | ENSMUSG00000002612 | Prrs39     | protein_codi | 34498410 | 34503063 | upstream     | -1198   | 1029   | shortestDistance |
| chr1 | 34564426  | 34564935 | 510  | 1.31  | 0.0116   | 0.0475   | ENSMUSG00000002612 | Prrs39     | protein_codi | 34543968 | 34560943 | upstream     | -3737   | 3483   | shortestDistance |
| chr1 | 34891619  | 34891936 | 318  | -1.08 | 0.00958  | 0.0411   | ENSMUSG0000002612  | Plekhh2    | protein_codi | 34849976 | 34879580 | downstream   | 41802   | 12039  | shortestDistance |
| chr1 | 35332130  | 35332883 | 754  | -1.54 | 9.42E-06 | 0.000157 | ENSMUSG00000007723 | Gm25096    | snoRNA       | 35178956 | 35179084 | upstream     | -153422 | 153046 | shortestDistance |
| chr1 | 35388214  | 35388501 | 288  | -1.13 | 0.00567  | 0.0275   | ENSMUSG00000007723 | Gm25096    | snoRNA       | 35178956 | 35179084 | upstream     | -209274 | 209130 | shortestDistance |
| chr1 | 35653225  | 35653734 | 510  | -1.65 | 0.00145  | 0.00957  | ENSMUSG0000010441  | Gm37068    | lincRNA      | 35625606 | 35651297 | upstream     | -2183   | 1928   | shortestDistance |
| chr1 | 35848137  | 35848503 | 367  | -1.15 | 0.00207  | 0.0126   | ENSMUSG0000010253  | 1110002004 | lincRNA      | 35879845 | 35881119 | upstream     | -31525  | 31342  | shortestDistance |
| chr1 | 35848730  | 35849212 | 483  | -1.35 | 0.000419 | 0.00359  | ENSMUSG0000010253  | 1110002004 | lincRNA      | 35879845 | 35881119 | upstream     | -30874  | 30633  | shortestDistance |
| chr1 | 35869394  | 35870112 | 719  | 1.21  | 0.00433  | 0.0223   | ENSMUSG0000010253  | 1110002004 | lincRNA      | 35879845 | 35881119 | upstream     | -10092  | 9733   | shortestDistance |
| chr1 | 35934397  | 35935570 | 634  | -1.05 | 0.00133  | 0.00896  | ENSMUSG0000010309  | Gm8022     | processed_p  | 35958919 | 35959822 | upstream     | -23665  | 23349  | shortestDistance |
| chr1 | 35973282  | 35973819 | 538  | -0.99 | 0.00435  | 0.0224   | ENSMUSG0000010227  | Gm37146    | lincRNA      | 35981960 | 35986373 | downstream   | 12823   | 8141   | shortestDistance |
| chr1 | 36162213  | 36163124 | 912  | 1.39  | 4.77E-05 | 0.000607 | ENSMUSG0000003747  | Ugg1t1     | protein_codi | 36140027 | 36244720 | inside       | 82052   | 22186  | shortestDistance |
| chr1 | 36233128  | 36233642 | 515  | 4.47  | 2.79E-11 | 3.14E-09 | ENSMUSG0000003747  | Ugg1t1     | protein_codi | 36140027 | 36244720 | inside       | 11335   | 11078  | shortestDistance |
| chr1 | 36325861  | 36326475 | 615  | 2.84  | 1.58E-10 | 1.35E-08 | ENSMUSG0000003744  | Arid5a     | protein_codi | 36307733 | 36324029 | downstream   | 18435   | 1832   | shortestDistance |
| chr1 | 36534440  | 36535144 | 715  | -1.85 | 1.22E-06 | 2.77E-05 | ENSMUSG0000006765  | Ankrd23    | protein_codi | 36530188 | 36536883 | inside       | 2086    | 1729   | shortestDistance |
| chr1 | 36566241  | 36566784 | 364  | 2.37  | 7.01E-07 | 1.74E-05 | ENSMUSG0000004633  | Fam178b    | protein_codi | 36562692 | 36683183 | inside       | 116581  | 3729   | shortestDistance |
| chr1 | 36835566  | 36835942 | 377  | 1.5   | 0.000734 | 0.00558  | ENSMUSG0000002611  | Tmem131    | protein_codi | 36792191 | 36943666 | inside       | 107912  | 43375  | shortestDistance |
| chr1 | 36836209  | 36836942 | 734  | 3.35  | 8.89E-13 | 1.65E-10 | ENSMUSG0000002611  | Tmem131    | protein_codi | 36792191 | 36943666 | inside       | 107090  | 44018  | shortestDistance |
| chr1 | 37300641  | 37301118 | 478  | 1.56  | 0.000489 | 0.00406  | ENSMUSG0000002611  | Inpp4a     | protein_codi | 37299865 | 37410736 | inside       | 1015    | 776    | shortestDistance |
| chr1 | 37317710  | 37318268 | 559  | 0.98  | 0.00962  | 0.0412   | ENSMUSG0000002611  | Inpp4a     | protein_codi | 37299865 | 37410736 | inside       | 18124   | 17845  | shortestDistance |
| chr1 | 37318476  | 37318987 | 512  | 1.11  | 0.00882  | 0.0386   | ENSMUSG0000002611  | Inpp4a     | protein_codi | 37299865 | 37410736 | inside       | 18867   | 18611  | shortestDistance |
| chr1 | 37322725  | 37323183 | 459  | 1.57  | 0.000298 | 0.00272  | ENSMUSG0000002611  | Inpp4a     | protein_codi | 37299865 | 37410736 | inside       | 23089   | 22860  | shortestDistance |
| chr1 | 37344209  | 37344909 | 701  | 1.68  | 0.000146 | 0.00153  | ENSMUSG0000002611  | Inpp4a     | protein_codi | 37299865 | 37410736 | inside       | 44694   | 44344  | shortestDistance |
| chr1 | 37486394  | 37486856 | 463  | 1.82  | 6.41E-05 | 0.000777 | ENSMUSG0000010394  | 4930594C11 | TEC          | 37485851 | 37488605 | inside       | 1980    | 543    | shortestDistance |
| chr1 | 37487025  | 37487487 | 463  | 2.01  | 1.09E-05 | 0.000178 | ENSMUSG0000010394  | 4930594C11 | TEC          | 37485851 | 37488605 | inside       | 1349    | 1118   | shortestDistance |
| chr1 | 37495786  | 37496349 | 564  | 0.87  | 0.0118   | 0.0481   | ENSMUSG0000002611  | Mgat4a     | protein_codi | 37439340 | 37541016 | inside       | 44948   | 44667  | shortestDistance |
| chr1 | 37561577  | 37562498 | 742  | 1.32  | 0.00562  | 0.0273   | ENSMUSG0000002611  | Mgat4a     | protein_codi | 37439340 | 37541016 | upstream     | -21112  | 20741  | shortestDistance |
| chr1 | 37691244  | 37691515 | 272  | 3.06  | 2.69E-09 | 1.50E-07 | ENSMUSG0000002609  | 2010300021 | protein_codi | 37611677 | 37720085 | inside       | 28705   | 28570  | shortestDistance |
| chr1 | 37890025  | 37890826 | 802  | 1.08  | 0.00186  | 0.0116   | ENSMUSG0000002608  | Mitd1      | protein_codi | 37874801 | 37890411 | overlapStart | -15     | 386    | shortestDistance |
| chr1 | 39313631  | 39314054 | 424  | 1.83  | 7.92E-05 | 0.00092  | ENSMUSG0000002607  | Npas2      | protein_codi | 39193731 | 39363236 | inside       | 120111  | 49182  | shortestDistance |
| chr1 | 39428255  | 39428605 | 351  | 1.64  | 0.000279 | 0.00259  | ENSMUSG0000000656  | Gm24826    | protein_codi | 39371492 | 39478755 | inside       | 50325   | 50150  | shortestDistance |
| chr1 | 39502965  | 39503761 | 797  | 1.45  | 0.000616 | 0.00487  | ENSMUSG0000000656  | Gm24826    | snoRNA       | 39519533 | 39519747 | upstream     | -16170  | 15772  | shortestDistance |
| chr1 | 39530286  | 39530575 | 290  | 1.14  | 0.00308  | 0.0171   | ENSMUSG0000000313  | Cnot11     | protein_codi | 39534992 | 39546889 | upstream     | -4562   | 4417   | shortestDistance |
| chr1 | 39578491  | 39578902 | 412  | 3.3   | 6.10E-11 | 6.05E-09 | ENSMUSG00000004823 | Rnf149     | protein_codi | 39551296 | 39577405 | upstream     | -1291   | 1086   | shortestDistance |
| chr1 | 39754235  | 39755123 | 889  | 1.51  | 2.63E-05 | 0.000371 | ENSMUSG00000005717 | Rfrf8      | protein_codi | 39665301 | 39720997 | upstream     | -33682  | 33238  | shortestDistance |
| chr1 | 39896504  | 39897083 | 580  | 1.39  | 0.00159  | 0.0103   | ENSMUSG0000002607  | Map4k4     | protein_codi | 39900913 | 40026310 | upstream     | -4119   | 3830   | shortestDistance |
| chr1 | 40022736  | 40023136 | 401  | 2.05  | 4.07E-06 | 7.70E-05 | ENSMUSG0000002607  | Map4k4     | protein_codi | 39900913 | 40026310 | inside       | 122023  | 3174   | shortestDistance |
| chr1 | 40030172  | 40030743 | 572  | 2.31  | 1.72E-06 | 3.69E-05 | ENSMUSG0000002607  | Map4k4     | protein_codi | 39900913 | 40026310 | downstream   | 129545  | 3862   | shortestDistance |
| chr1 | 40230278  | 40230776 | 499  | 1.08  | 0.00583  | 0.028    | ENSMUSG0000002607  | Il1r1      | protein_codi | 40225080 | 40317257 | inside       | 5447    | 5198   | shortestDistance |
| chr1 | 40240449  | 40240951 | 503  | 1.7   | 2.90E-05 | 0.000402 | ENSMUSG0000010356  | Gm38070    | TEC          | 40238020 | 40244499 | inside       | 2680    | 2429   | shortestDistance |
| chr1 | 40294802  | 40295503 | 702  | 2.45  | 2.46E-08 | 1.01E-06 | ENSMUSG0000002607  | Il1r1      | protein_codi | 40225080 | 40317257 | inside       | 70072   | 21754  | shortestDistance |
| chr1 | 40321839  | 40322241 | 403  | 2.01  | 5.60E-07 | 1.44E-05 | ENSMUSG0000007094  | Il1r1      | protein_codi | 40324610 | 40367562 | upstream     | -2570   | 2369   | shortestDistance |
| chr1 | 40498884  | 40410382 | 499  | 0.98  | 0.00824  | 0.0367   | ENSMUSG0000002606  | Il1r1      | protein_codi | 40429570 | 40465415 | upstream     | -19437  | 19188  | shortestDistance |
| chr1 | 40516357  | 40516772 | 416  | 1.59  | 0.00135  | 0.00903  | ENSMUSG0000002606  | Il18rap    | protein_codi | 40515362 | 40551705 | inside       | 1202    | 995    | shortestDistance |
| chr1 | 40619144  | 40619413 | 270  | -1.02 | 0.0124   | 0.05     | ENSMUSG00000026    |            |              |          |          |              |         |        |                  |

|      |          |          |       |       |          |          |                             |               |          |          |              |         |        |                  |
|------|----------|----------|-------|-------|----------|----------|-----------------------------|---------------|----------|----------|--------------|---------|--------|------------------|
| chr1 | 44064658 | 44064959 | 302   | -1.44 | 4.22E-05 | 0.000549 | ENSMUSG0000009184Gm8251     | protein_codi  | 44055952 | 44061936 | upstream     | -2872   | 2722   | shortestDistance |
| chr1 | 44158242 | 44158756 | 515   | -1.28 | 0.000332 | 0.00298  | ENSMUSG0000002604Erc5       | protein_codi  | 44147744 | 44181260 | inside       | 10755   | 10498  | shortestDistance |
| chr1 | 44173989 | 44174230 | 242   | -1.66 | 0.000333 | 0.00299  | ENSMUSG0000002604Erc5       | protein_codi  | 44147744 | 44181260 | inside       | 26366   | 7030   | shortestDistance |
| chr1 | 44198283 | 44199192 | 910   | -1.08 | 0.00179  | 0.0113   | ENSMUSG0000004682Mettl21e   | protein_codi  | 44204070 | 44218961 | downstream   | 20223   | 4878   | shortestDistance |
| chr1 | 44229090 | 44229386 | 297   | -1.21 | 0.00247  | 0.0145   | ENSMUSG0000004682Mettl21e   | protein_codi  | 44204070 | 44218961 | upstream     | -10277  | 10129  | shortestDistance |
| chr1 | 44465229 | 44465450 | 222   | -2.38 | 0.000163 | 0.00168  | ENSMUSG0000010156Tnx-ps1    | processed_p   | 44463923 | 44464231 | upstream     | -1109   | 998    | shortestDistance |
| chr1 | 44551229 | 44552846 | 1618  | -1.49 | 5.48E-06 | 9.93E-05 | ENSMUSG0000005687Gulp1      | protein_codi  | 44551511 | 44796838 | overlapStart | 527     | 282    | shortestDistance |
| chr1 | 44584580 | 44585369 | 790   | -1.3  | 0.000223 | 0.00216  | ENSMUSG0000005687Gulp1      | protein_codi  | 44551511 | 44796838 | inside       | 33463   | 33069  | shortestDistance |
| chr1 | 44628826 | 44629280 | 455   | -1.29 | 0.00149  | 0.00978  | ENSMUSG0000005687Gulp1      | protein_codi  | 44551511 | 44796838 | inside       | 77542   | 77315  | shortestDistance |
| chr1 | 45043247 | 45043832 | 586   | -1.77 | 5.59E-05 | 0.000693 | ENSMUSG0000010125Gm3496     | processed_p   | 44924149 | 44924893 | upstream     | -118647 | 118354 | shortestDistance |
| chr1 | 45110823 | 45111305 | 483   | -1.6  | 6.59E-05 | 0.000795 | ENSMUSG0000010193Gm5268     | processed_p   | 45178067 | 45179006 | upstream     | -67003  | 66762  | shortestDistance |
| chr1 | 45627950 | 45628395 | 446   | -1.39 | 0.00394  | 0.0207   | ENSMUSG0000010089Gm8304     | processed_p   | 45602026 | 45602753 | downstream   | 26146   | 25197  | shortestDistance |
| chr1 | 45672792 | 45673107 | 316   | -1.32 | 0.00152  | 0.00991  | ENSMUSG0000009512Gm23216    | snRNA         | 45685456 | 45685562 | downstream   | 12612   | 12349  | shortestDistance |
| chr1 | 45678959 | 45679648 | 690   | -1.65 | 1.23E-05 | 0.000197 | ENSMUSG0000009512Gm23216    | snRNA         | 45685456 | 45685562 | downstream   | 6258    | 5808   | shortestDistance |
| chr1 | 45873307 | 45873633 | 327   | -1.2  | 0.00228  | 0.0136   | ENSMUSG00000008481Gm5526    | processed_p   | 45857332 | 45857754 | upstream     | -15716  | 15553  | shortestDistance |
| chr1 | 45916062 | 45916695 | 634   | -0.98 | 0.00322  | 0.0177   | ENSMUSG0000002599Slc40a1    | protein_codi  | 45908068 | 45926523 | inside       | 10145   | 7994   | shortestDistance |
| chr1 | 46414827 | 46415493 | 667   | 0.98  | 0.00462  | 0.0234   | ENSMUSG0000010126Gm8326     | processed_p   | 46414502 | 46416932 | inside       | 658     | 325    | shortestDistance |
| chr1 | 46416854 | 46417267 | 414   | -1.14 | 0.00336  | 0.0183   | ENSMUSG0000010126Gm8326     | processed_p   | 46414502 | 46416932 | overlapEnd   | 2558    | 78     | shortestDistance |
| chr1 | 46769364 | 46769678 | 315   | -1.77 | 1.43E-05 | 0.000223 | ENSMUSG0000010133Dnah7c     | protein_codi  | 46425592 | 46807476 | inside       | 343929  | 37798  | shortestDistance |
| chr1 | 46970381 | 46970856 | 476   | -1.26 | 0.000169 | 0.00172  | ENSMUSG0000010016Gm28527    | processed_p   | 46896583 | 46896789 | upstream     | -73739  | 75502  | shortestDistance |
| chr1 | 47809577 | 47809833 | 257   | -1.13 | 0.00505  | 0.0251   | ENSMUSG00000008801Gm23829   | misc_RNA      | 47751299 | 47751568 | upstream     | -58137  | 58009  | shortestDistance |
| chr1 | 47853753 | 47854272 | 520   | -1.49 | 6.47E-05 | 0.000783 | ENSMUSG0000010199Gm19206    | processed_p   | 47914989 | 47915815 | downstream   | 61803   | 60717  | shortestDistance |
| chr1 | 48032576 | 48032865 | 290   | -1.84 | 2.42E-05 | 0.000346 | ENSMUSG0000010199Gm19206    | processed_p   | 47914989 | 47915815 | upstream     | -116905 | 116761 | shortestDistance |
| chr1 | 50025472 | 50025694 | 223   | -1.32 | 0.0101   | 0.0429   | ENSMUSG0000010176Gm8384     | processed_p   | 50056782 | 50058490 | upstream     | -31199  | 31088  | shortestDistance |
| chr1 | 50836142 | 50836474 | 333   | -2.24 | 1.18E-05 | 0.00019  | ENSMUSG0000010081Gm28321    | lincRNA       | 50815375 | 50817701 | downstream   | 20933   | 18441  | shortestDistance |
| chr1 | 50926720 | 50928283 | 1564  | -1.14 | 0.000639 | 0.00501  | ENSMUSG0000002610Tmeff2     | protein_codi  | 50900647 | 51187270 | inside       | 26855   | 26073  | shortestDistance |
| chr1 | 50935075 | 50935879 | 805   | -0.95 | 0.00283  | 0.0161   | ENSMUSG0000002610Tmeff2     | protein_codi  | 50900647 | 51187270 | inside       | 34830   | 34428  | shortestDistance |
| chr1 | 50962325 | 50963030 | 706   | -1.04 | 0.00493  | 0.0246   | ENSMUSG0000002610Tmeff2     | protein_codi  | 50900647 | 51187270 | inside       | 62031   | 61678  | shortestDistance |
| chr1 | 51288699 | 51289601 | 903   | -1.64 | 0.000344 | 0.00307  | ENSMUSG0000004595Cavin2     | protein_codi  | 51289126 | 51302960 | overlapStart | 24      | 427    | shortestDistance |
| chr1 | 51333593 | 51334695 | 1103  | -1.1  | 0.00351  | 0.0189   | ENSMUSG00000101799330175M20 | antisense_RI  | 51218386 | 51333779 | overlapStart | -365    | 186    | shortestDistance |
| chr1 | 51537948 | 51538522 | 575   | 2.98  | 5.58E-11 | 5.62E-09 | ENSMUSG00000009941Gm17767   | lincRNA       | 51507086 | 51596718 | inside       | 58483   | 30862  | shortestDistance |
| chr1 | 51566046 | 51566917 | 872   | -1.03 | 0.00237  | 0.0141   | ENSMUSG00000009941Gm17767   | lincRNA       | 51507086 | 51596718 | inside       | 30236   | 29801  | shortestDistance |
| chr1 | 51593795 | 51594354 | 560   | 1.19  | 0.000897 | 0.00654  | ENSMUSG00000009941Gm17767   | lincRNA       | 51507086 | 51596718 | inside       | 2644    | 2364   | shortestDistance |
| chr1 | 51626365 | 51626636 | 272   | -1.13 | 0.0032   | 0.0177   | ENSMUSG00000009941Gm17767   | lincRNA       | 51507086 | 51596718 | upstream     | -29782  | 29647  | shortestDistance |
| chr1 | 51647951 | 51648326 | 376   | 2.02  | 6.28E-06 | 0.000111 | ENSMUSG0000010174Gm28055    | lincRNA       | 51696324 | 51746943 | downstream   | 98805   | 47998  | shortestDistance |
| chr1 | 51708796 | 51709241 | 446   | -2.26 | 2.62E-08 | 1.07E-06 | ENSMUSG0000010174Gm28055    | lincRNA       | 51696324 | 51746943 | upstream     | 37925   | 12472  | shortestDistance |
| chr1 | 51789307 | 51789700 | 394   | 1.85  | 2.88E-05 | 4.00E-04 | ENSMUSG0000001841Myo1b      | protein_codi  | 51749765 | 51916071 | inside       | 126567  | 39542  | shortestDistance |
| chr1 | 51836545 | 51836809 | 265   | -3.16 | 6.84E-10 | 4.69E-08 | ENSMUSG0000001841Myo1b      | protein_codi  | 51749765 | 51916071 | inside       | 79394   | 79262  | shortestDistance |
| chr1 | 51837872 | 51838270 | 399   | -2.36 | 1.61E-07 | 4.97E-06 | ENSMUSG0000001841Myo1b      | protein_codi  | 51749765 | 51916071 | inside       | 78000   | 77801  | shortestDistance |
| chr1 | 51879263 | 51879680 | 418   | -1.55 | 4.97E-05 | 0.000628 | ENSMUSG0000010031Gm28323    | sense_intron  | 51877110 | 51879608 | overlapStart | 136     | 72     | shortestDistance |
| chr1 | 52012717 | 52013115 | 399   | 0.92  | 0.0114   | 0.047    | ENSMUSG0000006293Stat4      | protein_codi  | 51987148 | 52107189 | inside       | 25768   | 25569  | shortestDistance |
| chr1 | 52047426 | 52047739 | 314   | 1.68  | 0.00218  | 0.0132   | ENSMUSG0000006293Stat4      | protein_codi  | 51987148 | 52107189 | inside       | 60434   | 59450  | shortestDistance |
| chr1 | 52076541 | 52076865 | 325   | -1.41 | 0.00072  | 0.00551  | ENSMUSG0000006293Stat4      | protein_codi  | 51987148 | 52107189 | inside       | 89555   | 30324  | shortestDistance |
| chr1 | 52129779 | 52130208 | 430   | 2.59  | 4.91E-09 | 2.50E-07 | ENSMUSG0000002610Stat1      | protein_codi  | 52119440 | 52161865 | inside       | 10554   | 10339  | shortestDistance |
| chr1 | 52150611 | 52151045 | 435   | -0.99 | 0.00396  | 0.0208   | ENSMUSG0000002610Stat1      | protein_codi  | 52119440 | 52161865 | inside       | 31388   | 10820  | shortestDistance |
| chr1 | 52597844 | 52598156 | 313   | -0.96 | 0.00741  | 0.0338   | ENSMUSG0000010030Gm5527     | processed_p   | 52584518 | 52585159 | downstream   | 13482   | 12685  | shortestDistance |
| chr1 | 52702815 | 52703592 | 778   | 1.58  | 6.93E-06 | 0.000121 | ENSMUSG0000010096Gm29670    | sense_intron  | 52702722 | 52704762 | inside       | 1558    | 543    | shortestDistance |
| chr1 | 52729138 | 52729456 | 319   | 1.39  | 0.000379 | 0.00332  | ENSMUSG0000004143Mfsd6      | protein_codi  | 52656286 | 52727462 | upstream     | -1835   | 1676   | shortestDistance |
| chr1 | 52959888 | 52960767 | 780   | -0.94 | 0.00567  | 0.0275   | ENSMUSG00000043621700019D03 | protein_codi  | 52922324 | 53020179 | inside       | 59801   | 37664  | shortestDistance |
| chr1 | 53225806 | 53226402 | 597   | -2.13 | 7.02E-08 | 2.46E-06 | ENSMUSG0000002609Pms1       | protein_codi  | 53189187 | 53297018 | inside       | 70914   | 36619  | shortestDistance |
| chr1 | 53313083 | 53314060 | 978   | -0.98 | 0.00309  | 0.0172   | ENSMUSG0000002609Osgp1      | protein_codi  | 53313624 | 53326343 | overlapStart | -52     | 436    | shortestDistance |
| chr1 | 53340854 | 53341441 | 588   | 3.38  | 6.21E-14 | 1.86E-11 | ENSMUSG0000010183Gm18800    | transcribed_1 | 53326206 | 53342186 | inside       | 1038    | 745    | shortestDistance |
| chr1 | 53664280 | 53664652 | 373   | -1.74 | 0.000353 | 0.00313  | ENSMUSG0000009614Dnah7a     | protein_codi  | 53397006 | 53706784 | inside       | 42318   | 42132  | shortestDistance |
| chr1 | 53741812 | 53742458 | 647   | 2.94  | 5.99E-11 | 5.97E-09 | ENSMUSG0000002609Stk17b     | protein_codi  | 53755506 | 53785224 | downstream   | 43089   | 13048  | shortestDistance |
| chr1 | 53824926 | 53825276 | 351   | 2.8   | 4.78E-09 | 2.44E-07 | ENSMUSG0000004280Hecw2      | protein_codi  | 53806876 | 54195168 | inside       | 370067  | 18050  | shortestDistance |
| chr1 | 53906010 | 53906583 | 574   | -1.1  | 0.0068   | 0.0316   | ENSMUSG0000004280Hecw2      | protein_codi  | 53806876 | 54195168 | inside       | 288872  | 91934  | shortestDistance |
| chr1 | 53910243 | 53910692 | 450   | 2.19  | 1.23E-07 | 3.95E-06 | ENSMUSG0000004280Hecw2      | protein_codi  | 53806876 | 54195168 | inside       | 284700  | 103367 | shortestDistance |
| chr1 | 53940723 | 53941037 | 315   | -1.31 | 0.00112  | 0.00782  | ENSMUSG0000004280Hecw2      | protein_codi  | 53806876 | 54195168 | inside       | 254288  | 133847 | shortestDistance |
| chr1 | 54039132 | 54039427 | 296   | -1.19 | 0.0015   | 0.00981  | ENSMUSG0000004280Hecw2      | protein_codi  | 53806876 | 54195168 | inside       | 155888  | 155741 | shortestDistance |
| chr1 | 54279429 | 54280194 | 766   | -1.32 | 0.000107 | 0.00118  | ENSMUSG0000002598Cdc150     | protein_codi  | 54250683 | 54368727 | inside       | 29129   | 28746  | shortestDistance |
| chr1 | 54332846 | 54333322 | 477   | -1.06 | 0.00426  | 0.022    | ENSMUSG0000002598Cdc150     | protein_codi  | 54250683 | 54368727 | inside       | 82401   | 35405  | shortestDistance |
| chr1 | 54438485 | 54439195 | 711   | -0.94 | 0.00342  | 0.0186   | ENSMUSG00000004130Gtf3c3    | protein_codi  | 54396004 | 54438971 | overlapStart | 131     | 224    | shortestDistance |
| chr1 | 54492149 | 54492976 | 828   | -1.37 | 0.000222 | 0.00215  | ENSMUSG0000007367Pgsp1      | protein_codi  | 54472994 | 54557684 | inside       | 65122   | 19155  | shortestDistance |
| chr1 | 54557251 | 54557988 | 738   | -1.3  | 0.000199 | 0.00196  | ENSMUSG0000007367Pgsp1      | protein_codi  | 54472994 | 54557684 | overlapStart | 64      | 304    | shortestDistance |
| chr1 | 54647310 | 54647656 | 347   | -1.5  | 0.000168 | 0.00171  | ENSMUSG0000005233Ankr44     | protein_codi  | 54645340 | 54926387 | inside       | 278904  | 1970   | shortestDistance |
| chr1 | 54835779 | 54836223 | 445   | 1.75  | 2.29E-05 | 0.000331 | ENSMUSG0000005233Ankr44     | protein_codi  | 54645340 | 54926387 | inside       | 90386   | 90164  | shortestDistance |
| chr1 | 54837634 | 54838196 | 563   | 2.31  | 4.87E-07 | 1.28E-05 | ENSMUSG0000005233Ankr44     | protein_codi  | 54645340 | 54926387 | inside       | 88472   | 88191  | shortestDistance |
| chr1 | 54864975 | 54865659 | 685   | 2.73  | 4.48E-10 | 3.24E-08 | ENSMUSG0000005233Ankr44     | protein_codi  | 54645340 | 54926387 | inside       | 61070   | 60728  | shortestDistance |
| chr1 | 54884424 | 54889008 | 585   | 1.21  | 0.00215  | 0.013    | ENSMUSG0000005233Ankr44     | protein_codi  | 54645340 | 54926387 | inside       | 37671   | 37379  | shortestDistance |
| chr1 | 55191967 | 55192215 | 249   | -1.07 | 0.00939  | 0.0405   | ENSMUSG0000002597Rfn2       | protein_codi  | 55170159 | 55226782 | inside       | 34691   | 21808  | shortestDistance |
| chr1 | 55488283 | 55488607 | 325   | 1.43  | 0.00142  | 0.00941  | ENSMUSG0000003834Pclt1      | protein_codi  | 55405921 | 55754285 | inside       | 82524   | 82362  | shortestDistance |
| chr1 | 55618263 | 55619288 | 1026  | -0.99 | 0.0115   | 0.0472   | ENSMUSG0000003834Pclt1      | protein_codi  | 55405921 | 55754285 | inside       | 212855  | 134997 | shortestDistance |
| chr1 | 55821117 | 55821464 | 348</ |       |          |          |                             |               |          |          |              |         |        |                  |

































































































































|       |           |           |      |       |          |          |                                |              |          |          |              |         |        |                  |
|-------|-----------|-----------|------|-------|----------|----------|--------------------------------|--------------|----------|----------|--------------|---------|--------|------------------|
| chr15 | 67107051  | 67107404  | 354  | 1.53  | 0.000201 | 0.00198  | ENSMUSG00000013845t3gal1       | protein_codi | 67102875 | 67113992 | inside       | 6764    | 4176   | shortestDistance |
| chr15 | 67116633  | 67117207  | 575  | 1.53  | 0.000551 | 0.00445  | ENSMUSG00000013845t3gal1       | protein_codi | 67102875 | 67113992 | upstream     | -2928   | 2641   | shortestDistance |
| chr15 | 67124681  | 67125193  | 513  | 2.37  | 6.60E-08 | 2.34E-06 | ENSMUSG00000013845t3gal1       | protein_codi | 67102875 | 67113992 | upstream     | -10945  | 10689  | shortestDistance |
| chr15 | 67145395  | 67145714  | 320  | 1.21  | 0.001    | 0.00716  | ENSMUSG00000013845t3gal1       | protein_codi | 67102875 | 67113992 | upstream     | -31562  | 31403  | shortestDistance |
| chr15 | 67161609  | 67162199  | 591  | 1.88  | 5.23E-06 | 9.55E-05 | ENSMUSG00000013845t3gal1       | protein_codi | 67102875 | 67113992 | upstream     | -47912  | 47617  | shortestDistance |
| chr15 | 67217967  | 67218346  | 380  | 3.18  | 3.95E-10 | 2.92E-08 | ENSMUSG00000102061700012111R   | lincRNA      | 67226769 | 67377094 | upstream     | -8613   | 8423   | shortestDistance |
| chr15 | 67423850  | 67424509  | 660  | 1.07  | 0.01     | 0.0425   | ENSMUSG00000102061700012111R   | lincRNA      | 67226769 | 67377094 | downstream   | 197411  | 46756  | shortestDistance |
| chr15 | 67481550  | 67482157  | 608  | 2.96  | 1.35E-11 | 1.70E-09 | ENSMUSG00000102061700012111R   | lincRNA      | 67226769 | 67377094 | downstream   | 255085  | 104456 | shortestDistance |
| chr15 | 67626951  | 67627277  | 327  | -1.42 | 0.000342 | 0.00305  | ENSMUSG00000102061700012111R   | lincRNA      | 67226769 | 67377094 | downstream   | 400345  | 249857 | shortestDistance |
| chr15 | 67732845  | 67733528  | 684  | 1.73  | 4.40E-06 | 8.24E-05 | ENSMUSG0000002233Zfat          | protein_codi | 68083766 | 68258856 | downstream   | 525670  | 350238 | shortestDistance |
| chr15 | 67780741  | 67781338  | 598  | 3.67  | 1.86E-12 | 3.09E-10 | ENSMUSG0000002233Zfat          | protein_codi | 68083766 | 68258856 | downstream   | 477816  | 302428 | shortestDistance |
| chr15 | 67785252  | 67786116  | 865  | -1    | 0.005    | 0.0249   | ENSMUSG0000002233Zfat          | protein_codi | 68083766 | 68258856 | downstream   | 473172  | 297650 | shortestDistance |
| chr15 | 67947226  | 67947452  | 227  | -1.41 | 0.0107   | 0.0446   | ENSMUSG0000002233Zfat          | protein_codi | 68083766 | 68258856 | downstream   | 315117  | 136314 | shortestDistance |
| chr15 | 68086438  | 68086997  | 560  | -0.81 | 0.0116   | 0.0474   | ENSMUSG0000002233Zfat          | protein_codi | 68083766 | 68258856 | inside       | 172138  | 2672   | shortestDistance |
| chr15 | 68158068  | 68158352  | 285  | -1.43 | 0.000736 | 0.00559  | ENSMUSG0000002233Zfat          | protein_codi | 68083766 | 68258856 | inside       | 100646  | 74302  | shortestDistance |
| chr15 | 68227866  | 68228567  | 702  | -1.16 | 0.00151  | 0.00984  | ENSMUSG0000002233Zfat          | protein_codi | 68083766 | 68258856 | inside       | 30640   | 30289  | shortestDistance |
| chr15 | 68286739  | 68287573  | 835  | -1.28 | 0.000141 | 0.00148  | ENSMUSG0000006839Gm10240       | processed_pr | 68309819 | 68310301 | upstream     | -22663  | 22246  | shortestDistance |
| chr15 | 68646015  | 68647393  | 1379 | -0.89 | 0.00655  | 0.0307   | ENSMUSG0000009668Gm25987       | snRNA        | 68671416 | 68671522 | upstream     | -24712  | 24023  | shortestDistance |
| chr15 | 68924148  | 68924447  | 300  | -1.08 | 0.00322  | 0.0177   | ENSMUSG0000002233Khdrb3        | protein_codi | 68928420 | 69093512 | upstream     | -4122   | 3973   | shortestDistance |
| chr15 | 68927686  | 68929640  | 1955 | -0.92 | 0.00664  | 0.0311   | ENSMUSG0000002233Khdrb3        | protein_codi | 68928420 | 69093512 | overlapStart | 243     | 734    | shortestDistance |
| chr15 | 68934326  | 68934707  | 382  | -1.35 | 0.00134  | 0.00899  | ENSMUSG0000002233Khdrb3        | protein_codi | 68928420 | 69093512 | inside       | 6096    | 5906   | shortestDistance |
| chr15 | 68937287  | 68937685  | 399  | -1.09 | 0.00312  | 0.0173   | ENSMUSG0000002233Khdrb3        | protein_codi | 68928420 | 69093512 | inside       | 9066    | 8867   | shortestDistance |
| chr15 | 68960236  | 68960876  | 641  | -1.85 | 5.95E-07 | 1.51E-05 | ENSMUSG0000002233Khdrb3        | protein_codi | 68928420 | 69093512 | inside       | 32136   | 31816  | shortestDistance |
| chr15 | 68977063  | 68977330  | 268  | -2.12 | 6.05E-06 | 0.000108 | ENSMUSG0000002233Khdrb3        | protein_codi | 68928420 | 69093512 | inside       | 48776   | 48643  | shortestDistance |
| chr15 | 68977937  | 68978654  | 718  | -2.92 | 3.15E-10 | 2.40E-08 | ENSMUSG0000002233Khdrb3        | protein_codi | 68928420 | 69093512 | inside       | 49876   | 49517  | shortestDistance |
| chr15 | 69001477  | 69001841  | 365  | -1.9  | 9.26E-06 | 0.000155 | ENSMUSG0000002233Khdrb3        | protein_codi | 68928420 | 69093512 | inside       | 73239   | 73057  | shortestDistance |
| chr15 | 69002292  | 69002567  | 276  | -1.61 | 0.000143 | 0.0015   | ENSMUSG0000002233Khdrb3        | protein_codi | 68928420 | 69093512 | inside       | 74010   | 73872  | shortestDistance |
| chr15 | 69015176  | 69015748  | 573  | -1    | 0.00187  | 0.0117   | ENSMUSG0000002233Khdrb3        | protein_codi | 68928420 | 69093512 | inside       | 87042   | 77764  | shortestDistance |
| chr15 | 69017453  | 69017677  | 225  | -1.59 | 9.16E-05 | 0.00104  | ENSMUSG0000002233Khdrb3        | protein_codi | 68928420 | 69093512 | inside       | 89145   | 75835  | shortestDistance |
| chr15 | 69019519  | 69020124  | 606  | -1.1  | 0.000358 | 0.00316  | ENSMUSG0000002233Khdrb3        | protein_codi | 68928420 | 69093512 | inside       | 91402   | 73388  | shortestDistance |
| chr15 | 69034278  | 69034543  | 266  | -2.15 | 6.98E-07 | 1.73E-05 | ENSMUSG0000002233Khdrb3        | protein_codi | 68928420 | 69093512 | inside       | 105990  | 58969  | shortestDistance |
| chr15 | 69077800  | 69078412  | 613  | -0.86 | 0.00451  | 0.023    | ENSMUSG0000002233Khdrb3        | protein_codi | 68928420 | 69093512 | inside       | 149686  | 15100  | shortestDistance |
| chr15 | 69078629  | 69079017  | 389  | -1    | 0.0019   | 0.0118   | ENSMUSG0000002233Khdrb3        | protein_codi | 68928420 | 69093512 | inside       | 150403  | 14495  | shortestDistance |
| chr15 | 69079257  | 69080006  | 750  | -0.89 | 0.00314  | 0.0174   | ENSMUSG0000002233Khdrb3        | protein_codi | 68928420 | 69093512 | inside       | 151212  | 13506  | shortestDistance |
| chr15 | 69089811  | 69090184  | 374  | -1.59 | 6.56E-05 | 0.000791 | ENSMUSG0000002233Khdrb3        | protein_codi | 68928420 | 69093512 | inside       | 161578  | 3328   | shortestDistance |
| chr15 | 69104942  | 69105470  | 529  | -1.52 | 2.10E-05 | 0.000308 | ENSMUSG0000002233Khdrb3        | protein_codi | 68928420 | 69093512 | downstream   | 167786  | 11430  | shortestDistance |
| chr15 | 69107191  | 69107621  | 431  | -1.71 | 0.000169 | 0.00172  | ENSMUSG0000002233Khdrb3        | protein_codi | 68928420 | 69093512 | downstream   | 178986  | 13679  | shortestDistance |
| chr15 | 69164652  | 69165737  | 1086 | -1.46 | 0.000119 | 0.00129  | ENSMUSG0000002233Khdrb3        | protein_codi | 68928420 | 69093512 | downstream   | 236774  | 71140  | shortestDistance |
| chr15 | 69192619  | 69192688  | 250  | -1.15 | 0.00461  | 0.0234   | ENSMUSG0000007750Gm24232       | snRNA        | 69451015 | 69451146 | downstream   | 124402  | 124147 | shortestDistance |
| chr15 | 69477044  | 69477399  | 356  | 1.46  | 0.00187  | 0.0117   | ENSMUSG0000007750Gm24232       | snRNA        | 69451015 | 69451146 | upstream     | -26076  | 25898  | shortestDistance |
| chr15 | 69480767  | 69481509  | 743  | -1.33 | 7.24E-05 | 0.000856 | ENSMUSG0000007750Gm24232       | snRNA        | 69451015 | 69451146 | upstream     | -29992  | 29621  | shortestDistance |
| chr15 | 69575560  | 69576154  | 595  | -1.93 | 5.42E-08 | 1.98E-06 | ENSMUSG0000008068Gm23987       | snRNA        | 69685578 | 69685706 | downstream   | 109849  | 109424 | shortestDistance |
| chr15 | 69576779  | 69577178  | 400  | -1.51 | 0.000527 | 0.0043   | ENSMUSG0000008068Gm23987       | snRNA        | 69685578 | 69685706 | downstream   | 108728  | 108400 | shortestDistance |
| chr15 | 69613871  | 69614904  | 1034 | -0.83 | 0.00547  | 0.0267   | ENSMUSG0000008068Gm23987       | snRNA        | 69685578 | 69685706 | downstream   | 71318   | 70674  | shortestDistance |
| chr15 | 696849579 | 696850122 | 544  | -1.14 | 0.000464 | 0.00389  | ENSMUSG0000008068Gm23987       | snRNA        | 69685578 | 69685706 | upstream     | -164144 | 163873 | shortestDistance |
| chr15 | 69685803  | 69686132  | 328  | -1.15 | 0.00183  | 0.0115   | ENSMUSG0000008068Gm23987       | snRNA        | 69685578 | 69685706 | upstream     | -200262 | 200099 | shortestDistance |
| chr15 | 69922253  | 69922610  | 378  | -1    | 0.00882  | 0.0386   | ENSMUSG0000008068Gm23987       | snRNA        | 69685578 | 69685706 | upstream     | -236716 | 236527 | shortestDistance |
| chr15 | 70920937  | 70921221  | 285  | -0.94 | 0.00992  | 0.0422   | ENSMUSG0000003680Fam135b       | protein_codi | 71445678 | 71727838 | downstream   | 806759  | 524457 | shortestDistance |
| chr15 | 71240971  | 71241314  | 344  | -1.19 | 0.0202   | 0.0124   | ENSMUSG0000003680Fam135b       | protein_codi | 71445678 | 71727838 | downstream   | 486696  | 204364 | shortestDistance |
| chr15 | 72021696  | 72021998  | 303  | -1.36 | 0.000687 | 0.00531  | ENSMUSG0000007902Col22a1       | protein_codi | 71795795 | 72034227 | upstream     | 12380   | 12229  | shortestDistance |
| chr15 | 72083677  | 72083966  | 270  | -1.46 | 0.000233 | 0.00223  | ENSMUSG0000007902Col22a1       | protein_codi | 71795795 | 72034227 | upstream     | -49605  | 49470  | shortestDistance |
| chr15 | 72819543  | 72820021  | 479  | 1.24  | 0.00389  | 0.0205   | ENSMUSG0000004792Trappc9       | protein_codi | 72589621 | 73061204 | inside       | 241422  | 229922 | shortestDistance |
| chr15 | 72921353  | 72921802  | 450  | 2.47  | 1.24E-06 | 2.81E-05 | ENSMUSG0000004792Trappc9       | protein_codi | 72589621 | 73061204 | inside       | 139626  | 139402 | shortestDistance |
| chr15 | 72980774  | 72981246  | 473  | 1.62  | 5.12E-05 | 0.000644 | ENSMUSG0000004792Trappc9       | protein_codi | 72589621 | 73061204 | inside       | 80194   | 79958  | shortestDistance |
| chr15 | 73006615  | 73007031  | 417  | -0.98 | 0.00792  | 0.0355   | ENSMUSG0000004792Trappc9       | protein_codi | 72589621 | 73061204 | inside       | 54381   | 54173  | shortestDistance |
| chr15 | 73015274  | 73015597  | 324  | 2.15  | 0.000171 | 0.00174  | ENSMUSG0000004792Trappc9       | protein_codi | 72589621 | 73061204 | inside       | 45768   | 45607  | shortestDistance |
| chr15 | 73051898  | 73052442  | 545  | 1.02  | 0.0082   | 0.0365   | ENSMUSG0000004792Trappc9       | protein_codi | 72589621 | 73061204 | inside       | 9034    | 8762   | shortestDistance |
| chr15 | 73154483  | 73155133  | 651  | -0.9  | 0.00622  | 0.0295   | ENSMUSG0000003669Ago2          | protein_codi | 73095844 | 73184840 | inside       | 30032   | 29707  | shortestDistance |
| chr15 | 73161916  | 73162836  | 921  | 0.94  | 0.00471  | 0.0238   | ENSMUSG0000003669Ago2          | protein_codi | 73095844 | 73184840 | inside       | 22464   | 22004  | shortestDistance |
| chr15 | 73176559  | 73177500  | 942  | 1.33  | 4.46E-05 | 0.000575 | ENSMUSG0000003669Ago2          | protein_codi | 73095844 | 73184840 | inside       | 7810    | 7340   | shortestDistance |
| chr15 | 73318652  | 73318921  | 270  | -3.25 | 8.98E-12 | 1.22E-09 | ENSMUSG0000002260Pk2           | protein_codi | 73205333 | 73423280 | inside       | 104494  | 104359 | shortestDistance |
| chr15 | 73486963  | 73488069  | 1107 | 1.09  | 0.00931  | 0.0402   | ENSMUSG0000003666Derm3         | protein_codi | 73512560 | 73572242 | upstream     | -25044  | 24491  | shortestDistance |
| chr15 | 73617390  | 73618283  | 894  | 0.85  | 0.0124   | 0.05     | ENSMUSG0000007902Sic45a4       | protein_codi | 73577424 | 73645762 | inside       | 27926   | 27479  | shortestDistance |
| chr15 | 73662285  | 73662645  | 361  | 4.01  | 3.50E-12 | 5.37E-10 | ENSMUSG00000099951700010813    | processed_tr | 73645852 | 73652347 | downstream   | 16613   | 9938   | shortestDistance |
| chr15 | 74453783  | 74454527  | 745  | -1.84 | 0.000142 | 0.00149  | ENSMUSG0000003473Adbg1         | protein_codi | 74516195 | 74589465 | upstream     | -62040  | 61668  | shortestDistance |
| chr15 | 74930780  | 74931220  | 441  | 0.88  | 0.0114   | 0.0469   | ENSMUSG0000010088Gm6610        | unprocessed  | 74924447 | 74925299 | downstream   | 6553    | 5481   | shortestDistance |
| chr15 | 74931662  | 74931976  | 315  | 1.52  | 7.41E-05 | 0.000871 | ENSMUSG0000010088Gm6610        | unprocessed  | 74924447 | 74925299 | downstream   | 7372    | 6363   | shortestDistance |
| chr15 | 75021185  | 75021882  | 698  | 2.64  | 2.00E-07 | 6.04E-06 | ENSMUSG0000010028Gm28068       | lincRNA      | 75007303 | 75024410 | inside       | 14231   | 2528   | shortestDistance |
| chr15 | 75062098  | 75062715  | 618  | 1.7   | 2.92E-05 | 0.000405 | ENSMUSG0000009977Gm5960        | unprocessed  | 75071112 | 75074638 | upstream     | -8706   | 8397   | shortestDistance |
| chr15 | 75069998  | 75070264  | 267  | 2.53  | 3.35E-06 | 6.52E-05 | ENSMUSG0000009977Gm5960        | unprocessed  | 75071112 | 75074638 | upstream     | -981    | 848    | shortestDistance |
| chr15 | 75111777  | 75112242  | 466  | 1.12  | 0.0111   | 0.0458   | ENSMUSG0000002248Ly6c2         | protein_codi | 75108158 | 75111970 | overlapStart | -40     | 193    | shortestDistance |
| chr15 | 75137711  | 75138097  | 387  | 2.88  | 2.83E-08 | 1.15E-06 | ENSMUSG000001020518301271078</ |              |          |          |              |         |        |                  |





|       |          |          |      |       |          |          |                    |            |              |          |          |              |        |       |                  |
|-------|----------|----------|------|-------|----------|----------|--------------------|------------|--------------|----------|----------|--------------|--------|-------|------------------|
| chr16 | 12764273 | 12764511 | 239  | 2.97  | 3.07E-07 | 8.66E-06 | ENSMUSG00000009141 | Gm6327     | processed_p  | 12760032 | 12761366 | upstream     | -3026  | 2907  | shortestDistance |
| chr16 | 12780657 | 12780991 | 335  | 1.49  | 0.00102  | 0.00722  | ENSMUSG00000009141 | Gm6327     | processed_p  | 12760032 | 12761366 | upstream     | -19458 | 19291 | shortestDistance |
| chr16 | 12936627 | 12937030 | 404  | 2.15  | 1.38E-06 | 3.07E-05 | ENSMUSG00000010156 | 17000031   | lincRNA      | 12811390 | 12848653 | downstream   | 125438 | 87974 | shortestDistance |
| chr16 | 13197291 | 13197766 | 476  | -1.24 | 0.00162  | 0.0104   | ENSMUSG00000002254 | Erc4       | protein_codi | 13109684 | 13150617 | downstream   | 87844  | 46674 | shortestDistance |
| chr16 | 13216045 | 13216573 | 529  | -1.3  | 0.000766 | 0.00578  | ENSMUSG0000000956  | Mk2        | protein_codi | 13256481 | 13417529 | upstream     | -40172 | 39908 | shortestDistance |
| chr16 | 13232782 | 13233463 | 682  | -1.59 | 3.08E-05 | 0.000423 | ENSMUSG0000000956  | Mk2        | protein_codi | 13256481 | 13417529 | upstream     | -23359 | 32018 | shortestDistance |
| chr16 | 13239057 | 13239490 | 434  | -1.08 | 0.00189  | 0.0118   | ENSMUSG0000000956  | Mk2        | protein_codi | 13256481 | 13417529 | upstream     | -17207 | 16991 | shortestDistance |
| chr16 | 13299056 | 13299352 | 297  | -1.73 | 5.42E-05 | 0.000676 | ENSMUSG0000000956  | Mk2        | protein_codi | 13256481 | 13417529 | inside       | 42723  | 42575 | shortestDistance |
| chr16 | 13306332 | 13306646 | 315  | -1.35 | 0.00312  | 0.0173   | ENSMUSG0000000956  | Mk2        | protein_codi | 13256481 | 13417529 | inside       | 50008  | 49851 | shortestDistance |
| chr16 | 13448442 | 13448814 | 373  | -0.94 | 0.0117   | 0.0479   | ENSMUSG00000008752 | Gm15738    | antisense_RI | 13354374 | 13468755 | inside       | 20127  | 19941 | shortestDistance |
| chr16 | 13716834 | 13717447 | 614  | 1.79  | 4.65E-05 | 0.000595 | ENSMUSG00000002268 | Pla2g120   | protein_codi | 13715057 | 13730983 | inside       | 13843  | 1777  | shortestDistance |
| chr16 | 13994251 | 13994691 | 441  | -1.72 | 3.22E-05 | 0.00044  | ENSMUSG00000004411 | 2900011008 | protein_codi | 13986604 | 14101500 | inside       | 7867   | 7647  | shortestDistance |
| chr16 | 14021208 | 14021786 | 579  | 1.77  | 3.68E-05 | 0.000491 | ENSMUSG00000004411 | 2900011008 | protein_codi | 13986604 | 14101500 | inside       | 34893  | 34604 | shortestDistance |
| chr16 | 14131847 | 14132218 | 372  | 2.72  | 8.87E-09 | 4.20E-07 | ENSMUSG00000006065 | Marf1      | protein_codi | 14109166 | 14159274 | inside       | 27242  | 22681 | shortestDistance |
| chr16 | 14159158 | 14159727 | 570  | 0.95  | 0.00398  | 0.0209   | ENSMUSG00000006065 | Marf1      | protein_codi | 14109166 | 14159274 | overlapStart | -168   | 116   | shortestDistance |
| chr16 | 14195465 | 14195750 | 286  | -1.19 | 0.00574  | 0.0277   | ENSMUSG00000001883 | Myh11      | protein_codi | 14194527 | 14291408 | inside       | 95800  | 938   | shortestDistance |
| chr16 | 14265217 | 14265906 | 690  | -1.37 | 0.000253 | 0.00239  | ENSMUSG00000001883 | Myh11      | protein_codi | 14194527 | 14291408 | inside       | 25846  | 25502 | shortestDistance |
| chr16 | 14377366 | 14377707 | 342  | -1.67 | 2.30E-05 | 0.000332 | ENSMUSG00000002308 | Abcc1      | protein_codi | 14361558 | 14475737 | inside       | 15978  | 15808 | shortestDistance |
| chr16 | 14439039 | 14439816 | 778  | -1.12 | 0.000219 | 0.00213  | ENSMUSG00000002308 | Abcc1      | protein_codi | 14361558 | 14475737 | inside       | 77870  | 35921 | shortestDistance |
| chr16 | 14477971 | 14478353 | 383  | -1.02 | 0.00547  | 0.0267   | ENSMUSG00000002308 | Abcc1      | protein_codi | 14361558 | 14475737 | downstream   | 11604  | 2234  | shortestDistance |
| chr16 | 14705274 | 14706346 | 1073 | -1.6  | 2.99E-07 | 8.49E-06 | ENSMUSG00000002267 | Sna2       | protein_codi | 14705852 | 14709395 | overlapStart | -42    | 494   | shortestDistance |
| chr16 | 14940815 | 14941528 | 714  | -2.28 | 2.09E-10 | 1.72E-08 | ENSMUSG00000006861 | Efcab1     | protein_codi | 14906637 | 14925879 | downstream   | 34535  | 14936 | shortestDistance |
| chr16 | 15254601 | 15255044 | 444  | -2.11 | 1.20E-05 | 0.000193 | ENSMUSG00000006931 | Gm7731     | processed_p  | 15216859 | 15217328 | upstream     | -37494 | 37273 | shortestDistance |
| chr16 | 15294920 | 15295230 | 311  | -1.39 | 0.000699 | 0.00538  | ENSMUSG00000009447 | Gm21897    | protein_codi | 15317458 | 15318957 | upstream     | -22383 | 22228 | shortestDistance |
| chr16 | 15593974 | 15594720 | 747  | -0.93 | 0.00205  | 0.0126   | ENSMUSG00000002267 | Ube2v2     | protein_codi | 15552677 | 15594524 | overlapStart | 177    | 196   | shortestDistance |
| chr16 | 15759691 | 15760460 | 770  | -1    | 0.00676  | 0.0315   | ENSMUSG00000002267 | Prkdc      | protein_codi | 15637866 | 15842235 | inside       | 122210 | 81775 | shortestDistance |
| chr16 | 15862248 | 15863737 | 1490 | -0.8  | 0.00869  | 0.0381   | ENSMUSG00000002267 | Mx2        | protein_codi | 15848441 | 15863369 | overlapStart | 377    | 368   | shortestDistance |
| chr16 | 15877182 | 15877477 | 296  | -1.07 | 0.00531  | 0.0261   | ENSMUSG00000007163 | Cebpd      | protein_codi | 15887286 | 15891031 | upstream     | -9956  | 9809  | shortestDistance |
| chr16 | 15985984 | 15986786 | 803  | -1.01 | 0.00184  | 0.0116   | ENSMUSG00000004197 | Spidr      | protein_codi | 15889227 | 16146851 | inside       | 160466 | 96757 | shortestDistance |
| chr16 | 16099622 | 16100257 | 636  | -1.03 | 0.00155  | 0.0101   | ENSMUSG00000004197 | Spidr      | protein_codi | 15889227 | 16146851 | inside       | 46911  | 46594 | shortestDistance |
| chr16 | 16104284 | 16104624 | 341  | -0.89 | 0.00713  | 0.0328   | ENSMUSG00000004197 | Spidr      | protein_codi | 15889227 | 16146851 | inside       | 42397  | 42227 | shortestDistance |
| chr16 | 16150739 | 16150961 | 223  | -0.9  | 0.0109   | 0.0452   | ENSMUSG00000004197 | Spidr      | protein_codi | 15889227 | 16146851 | upstream     | -3999  | 3888  | shortestDistance |
| chr16 | 16202028 | 16202371 | 344  | -0.96 | 0.00418  | 0.0217   | ENSMUSG00000004195 | Pkp2       | protein_codi | 16213318 | 16272712 | upstream     | -11118 | 10947 | shortestDistance |
| chr16 | 16212781 | 16213640 | 860  | -1.09 | 0.000722 | 0.00551  | ENSMUSG00000004195 | Pkp2       | protein_codi | 16213318 | 16272712 | overlapStart | -108   | 322   | shortestDistance |
| chr16 | 16213882 | 16214490 | 609  | -1.71 | 9.93E-07 | 2.34E-05 | ENSMUSG00000004195 | Pkp2       | protein_codi | 16213318 | 16272712 | inside       | 868    | 564   | shortestDistance |
| chr16 | 16244642 | 16245010 | 369  | -3.05 | 5.56E-11 | 5.62E-09 | ENSMUSG00000004195 | Pkp2       | protein_codi | 16213318 | 16272712 | inside       | 31508  | 27702 | shortestDistance |
| chr16 | 16438467 | 16438836 | 370  | -1.53 | 0.000221 | 0.00215  | ENSMUSG00000002278 | Fg4        | protein_codi | 16416917 | 16600549 | inside       | 161897 | 21550 | shortestDistance |
| chr16 | 16549093 | 16549553 | 461  | -1.14 | 0.00129  | 0.00874  | ENSMUSG00000002278 | Fg4        | protein_codi | 16416917 | 16600549 | inside       | 51226  | 50996 | shortestDistance |
| chr16 | 16571215 | 16571760 | 546  | 1.55  | 2.34E-05 | 0.000337 | ENSMUSG00000002278 | Fg4        | protein_codi | 16416917 | 16600549 | inside       | 29061  | 28789 | shortestDistance |
| chr16 | 16599515 | 16600810 | 1296 | -1.33 | 1.65E-05 | 0.000251 | ENSMUSG00000002278 | Fg4        | protein_codi | 16416917 | 16600549 | overlapStart | 387    | 261   | shortestDistance |
| chr16 | 16857125 | 16857408 | 284  | 3.58  | 6.95E-10 | 4.75E-08 | ENSMUSG00000007573 | Igll1      | protein_codi | 16860671 | 16863985 | downstream   | 6719   | 3263  | shortestDistance |
| chr16 | 16920934 | 16921716 | 783  | -1.21 | 0.00274  | 0.0157   | ENSMUSG00000002618 | Ppm1f      | protein_codi | 16896469 | 16927364 | inside       | 24856  | 5648  | shortestDistance |
| chr16 | 17001070 | 17001478 | 409  | 1.49  | 0.000231 | 0.00222  | ENSMUSG00000002635 | Mapk1      | protein_codi | 16983382 | 17047453 | inside       | 17892  | 17688 | shortestDistance |
| chr16 | 17085522 | 17085974 | 453  | 1.55  | 0.00015  | 0.00156  | ENSMUSG00000002277 | Vpel1      | protein_codi | 17069696 | 17087045 | inside       | 16052  | 1071  | shortestDistance |
| chr16 | 17144326 | 17144623 | 298  | 1.32  | 0.00155  | 0.0101   | ENSMUSG00000002277 | Vpel1      | protein_codi | 17144621 | 17160701 | overlapStart | -147   | 2     | shortestDistance |
| chr16 | 17182153 | 17182576 | 424  | 1.97  | 1.60E-06 | 3.49E-05 | ENSMUSG00000003896 | Ube2l3     | protein_codi | 17152013 | 17202649 | inside       | 20285  | 20073 | shortestDistance |
| chr16 | 17222198 | 17222554 | 357  | 1.63  | 0.000141 | 0.00148  | ENSMUSG00000006016 | Rimbp3     | protein_codi | 17208135 | 17213921 | downstream   | 14241  | 8277  | shortestDistance |
| chr16 | 18144191 | 18144616 | 426  | -1.49 | 0.000845 | 0.00625  | ENSMUSG00000004381 | Rtnr4      | protein_codi | 18127642 | 18152408 | inside       | 16762  | 7792  | shortestDistance |
| chr16 | 18169034 | 18169616 | 583  | 1.16  | 0.00614  | 0.0292   | ENSMUSG00000009029 | Mir6366    | miRNA        | 18165089 | 18165170 | upstream     | -4155  | 3864  | shortestDistance |
| chr16 | 18211752 | 18212123 | 372  | 1.17  | 0.00493  | 0.0246   | ENSMUSG00000009077 | Cdc188     | protein_codi | 18218170 | 18219313 | upstream     | -6232  | 6047  | shortestDistance |
| chr16 | 18229463 | 18229921 | 459  | -1.97 | 1.38E-05 | 0.000217 | ENSMUSG00000006016 | Zdhc8      | protein_codi | 18220754 | 18235136 | inside       | 5444   | 5215  | shortestDistance |
| chr16 | 18411718 | 18412448 | 731  | -1.07 | 0.000876 | 0.00641  | ENSMUSG00000000032 | Comt       | protein_codi | 18406886 | 18426852 | inside       | 14769  | 4832  | shortestDistance |
| chr16 | 18464208 | 18464765 | 558  | -0.95 | 0.0084   | 0.0372   | ENSMUSG00000007570 | Tnxd2      | protein_codi | 18426384 | 18479073 | inside       | 38102  | 14308 | shortestDistance |
| chr16 | 18577686 | 18578141 | 456  | -0.99 | 0.00838  | 0.0371   | ENSMUSG00000009095 | Tbx1       | protein_codi | 18581713 | 18586969 | downstream   | 9055   | 3572  | shortestDistance |
| chr16 | 18621551 | 18621804 | 254  | -1.16 | 0.00426  | 0.022    | ENSMUSG00000007570 | Gp1bb      | protein_codi | 18620319 | 18622403 | inside       | 725    | 599   | shortestDistance |
| chr16 | 18655069 | 18656163 | 1095 | 1.21  | 0.000369 | 0.00325  | ENSMUSG00000007721 | 5-Sep      | protein_codi | 18621811 | 18629938 | upstream     | -25678 | 25131 | shortestDistance |
| chr16 | 18705141 | 18705730 | 590  | -1.45 | 0.000283 | 0.00261  | ENSMUSG00000004137 | Cldn5      | protein_codi | 18776847 | 18778260 | upstream     | -71411 | 71117 | shortestDistance |
| chr16 | 18712580 | 18712974 | 395  | -1.52 | 0.000353 | 0.00313  | ENSMUSG00000004137 | Cldn5      | protein_codi | 18776847 | 18778260 | upstream     | -64070 | 63873 | shortestDistance |
| chr16 | 18836382 | 18837215 | 834  | -0.85 | 0.00687  | 0.0319   | ENSMUSG00000007163 | 2510002024 | protein_codi | 18836578 | 18840160 | overlapStart | 220    | 196   | shortestDistance |
| chr16 | 19002640 | 19002907 | 268  | -1.35 | 0.0019   | 0.0118   | ENSMUSG00000010502 | Gm18747    | processed_p  | 19018055 | 19018702 | downstream   | 15928  | 15148 | shortestDistance |
| chr16 | 19003008 | 19003468 | 461  | -1.66 | 2.22E-05 | 0.000322 | ENSMUSG00000010502 | Gm18747    | processed_p  | 19018055 | 19018702 | downstream   | 15464  | 14587 | shortestDistance |
| chr16 | 19786486 | 19786773 | 288  | -1.17 | 5.78E-05 | 0.000713 | ENSMUSG00000002268 | B3gnt5     | protein_codi | 19760208 | 19772725 | downstream   | 26422  | 13733 | shortestDistance |
| chr16 | 19843387 | 19844339 | 953  | -1.02 | 0.00143  | 0.00946  | ENSMUSG00000007533 | A930003A15 | protein_codi | 19876570 | 19883897 | downstream   | 40034  | 32231 | shortestDistance |
| chr16 | 19884069 | 19884923 | 855  | -1.09 | 0.000732 | 0.00557  | ENSMUSG00000009923 | Gm27883    | miRNA        | 19883799 | 19883900 | upstream     | -596   | 169   | shortestDistance |
| chr16 | 19912396 | 19913111 | 716  | 2.41  | 7.52E-09 | 3.65E-07 | ENSMUSG00000009923 | Gm27883    | miRNA        | 19883799 | 19883900 | upstream     | -28854 | 28496 | shortestDistance |
| chr16 | 19962957 | 19963383 | 427  | 2.31  | 4.98E-07 | 1.30E-05 | ENSMUSG00000004300 | Klhl6      | protein_codi | 19946499 | 19983037 | upstream     | -17409 | 16458 | shortestDistance |
| chr16 | 20000268 | 20000625 | 358  | 1.81  | 0.00026  | 0.00244  | ENSMUSG00000004300 | Klhl6      | protein_codi | 19946499 | 19983037 | upstream     | -17409 | 17231 | shortestDistance |
| chr16 | 20127368 | 20127821 | 454  | 2.26  | 5.69E-06 | 0.000103 | ENSMUSG00000006290 | Klhl24     | protein_codi | 20097554 | 20127744 | overlapEnd   | 30400  | 77    | shortestDistance |
| chr16 | 20265083 | 20265405 | 323  | -1.44 | 0.000405 | 0.00349  | ENSMUSG00000003391 | Parl       | protein_codi | 20279820 | 20302387 | downstream   | 37143  | 14415 | shortestDistance |
| chr16 | 20316789 | 20317185 | 397  | 1.45  | 0.00014  | 0.00147  | ENSMUSG00000002281 | Cyp2ab1    | protein_codi | 20308387 | 20323065 | inside       | 6078   | 5880  | shortestDistance |
| chr16 |          |          |      |       |          |          |                    |            |              |          |          |              |        |       |                  |



|       |          |          |      |       |          |          |                                          |              |          |            |              |         |                  |                  |
|-------|----------|----------|------|-------|----------|----------|------------------------------------------|--------------|----------|------------|--------------|---------|------------------|------------------|
| chr16 | 37725917 | 37726151 | 235  | 1.49  | 0.006    | 0.0287   | ENSMUSG0000002281Fst1                    | protein_codi | 37776873 | 37836514   | upstream     | -50839  | 50722            | shortestDistance |
| chr16 | 37788326 | 37788960 | 635  | -1.78 | 0.000101 | 0.00112  | ENSMUSG0000002281Fst1                    | protein_codi | 37776873 | 37836514   | inside       | 11770   | 11453            | shortestDistance |
| chr16 | 37856282 | 37856625 | 344  | -2.12 | 3.75E-07 | 1.03E-05 | ENSMUSG0000010876Gm36028                 | protein_codi | 37850913 | 37861146   | inside       | 4692    | 4521             | shortestDistance |
| chr16 | 37874518 | 37875159 | 642  | 2.22  | 6.67E-08 | 2.36E-06 | ENSMUSG0000003415Lrrc58                  | protein_codi | 37868389 | 37888858   | inside       | 6449    | 6129             | shortestDistance |
| chr16 | 37879050 | 37879352 | 303  | 1.61  | 0.00164  | 0.0105   | ENSMUSG0000003415Lrrc58                  | protein_codi | 37868389 | 37888858   | inside       | 10812   | 9506             | shortestDistance |
| chr16 | 38002529 | 38002874 | 346  | -1.48 | 0.000527 | 0.0043   | ENSMUSG0000004696Gpr156                  | protein_codi | 37916496 | 38007527   | inside       | 86206   | 4653             | shortestDistance |
| chr16 | 38105438 | 38105963 | 526  | 1.23  | 0.00152  | 0.0099   | ENSMUSG0000002281Gsk3b                   | protein_codi | 38089001 | 38246084   | inside       | 16699   | 16437            | shortestDistance |
| chr16 | 38294767 | 38295912 | 1146 | -1.78 | 5.44E-06 | 9.88E-05 | ENSMUSG0000002280Nr112                   | protein_codi | 38248323 | 38294824   | overlapStart | -516    | 57               | shortestDistance |
| chr16 | 38307669 | 38308285 | 617  | -1.24 | 0.00029  | 0.00266  | ENSMUSG0000002280Maats1                  | protein_codi | 38297754 | 38342143   | inside       | 34166   | 9915             | shortestDistance |
| chr16 | 38354612 | 38354830 | 219  | 1.4   | 0.00673  | 0.0314   | ENSMUSG00000009546Gm21987                | protein_codi | 38347040 | 38362297   | inside       | 7681    | 7467             | shortestDistance |
| chr16 | 38395170 | 38395815 | 646  | 1.47  | 7.71E-05 | 0.000899 | ENSMUSG0000000284Pla1a                   | protein_codi | 38396119 | 38433145   | downstream   | 37653   | 304              | shortestDistance |
| chr16 | 38406746 | 38407105 | 360  | 1.64  | 1.54E-05 | 0.000237 | ENSMUSG0000000284Pla1a                   | protein_codi | 38396119 | 38433145   | inside       | 26219   | 10627            | shortestDistance |
| chr16 | 38476198 | 38477034 | 837  | -0.86 | 0.00748  | 0.034    | ENSMUSG0000007512Cd80                    | protein_codi | 38458933 | 38486933   | inside       | 17683   | 9899             | shortestDistance |
| chr16 | 38632122 | 38632572 | 451  | 1.09  | 0.00749  | 0.034    | ENSMUSG0000002279Arhgap31                | protein_codi | 38598340 | 38713274   | inside       | 80927   | 33782            | shortestDistance |
| chr16 | 38636650 | 38637189 | 540  | 2     | 2.66E-07 | 7.68E-06 | ENSMUSG0000002279Arhgap31                | protein_codi | 38598340 | 38713274   | inside       | 76354   | 38310            | shortestDistance |
| chr16 | 38648938 | 38649398 | 461  | 3.4   | 2.99E-10 | 2.31E-08 | ENSMUSG0000002279Arhgap31                | protein_codi | 38598340 | 38713274   | inside       | 64106   | 50598            | shortestDistance |
| chr16 | 38678845 | 38680074 | 1230 | 1.1   | 0.000613 | 0.00485  | ENSMUSG0000002279Arhgap31                | protein_codi | 38598340 | 38713274   | inside       | 33814   | 33200            | shortestDistance |
| chr16 | 38694912 | 38695610 | 699  | 2.15  | 1.55E-06 | 3.40E-05 | ENSMUSG0000002279Arhgap31                | protein_codi | 38598340 | 38713274   | inside       | 18013   | 17664            | shortestDistance |
| chr16 | 38724244 | 38724614 | 371  | -1.65 | 0.000175 | 0.00177  | ENSMUSG0000002279Arhgap31                | protein_codi | 38598340 | 38713274   | upstream     | -11155  | 10970            | shortestDistance |
| chr16 | 38799873 | 38800544 | 672  | -1.34 | 0.000169 | 0.00172  | ENSMUSG0000004943Upk1b                   | protein_codi | 38773184 | 38800203   | overlapStart | -5      | 330              | shortestDistance |
| chr16 | 38986378 | 38986808 | 431  | -2.68 | 8.35E-10 | 5.58E-08 | ENSMUSG0000002279Igsf11                  | protein_codi | 38892671 | 39027159   | inside       | 93922   | 40351            | shortestDistance |
| chr16 | 39048899 | 39049265 | 367  | -1.16 | 0.00141  | 0.00936  | ENSMUSG0000002279Igsf11                  | protein_codi | 38892671 | 39027159   | downstream   | 156411  | 21740            | shortestDistance |
| chr16 | 39053006 | 39053571 | 566  | -1.25 | 0.00181  | 0.0114   | ENSMUSG0000002279Igsf11                  | protein_codi | 38892671 | 39027159   | downstream   | 160617  | 25847            | shortestDistance |
| chr16 | 39056077 | 39056397 | 321  | -1.09 | 0.00288  | 0.0163   | ENSMUSG0000002279Igsf11                  | protein_codi | 38892671 | 39027159   | downstream   | 163566  | 28918            | shortestDistance |
| chr16 | 39062466 | 39063042 | 577  | -0.97 | 0.00738  | 0.0336   | ENSMUSG0000002279Igsf11                  | protein_codi | 38892671 | 39027159   | downstream   | 170083  | 35307            | shortestDistance |
| chr16 | 39109339 | 39109902 | 564  | -1.11 | 0.00202  | 0.0124   | ENSMUSG0000002279Igsf11                  | protein_codi | 38892671 | 39027159   | downstream   | 216949  | 82180            | shortestDistance |
| chr16 | 39120560 | 39121040 | 481  | -1.26 | 0.00165  | 0.0106   | ENSMUSG0000002279Igsf11                  | protein_codi | 38892671 | 39027159   | downstream   | 228129  | 93401            | shortestDistance |
| chr16 | 39984139 | 39985188 | 1060 | -1.72 | 9.66E-06 | 0.00016  | ENSMUSG0000006108Lamp                    | protein_codi | 39984361 | 42181679   | overlapStart | 307     | 222              | shortestDistance |
| chr16 | 40271879 | 40272234 | 356  | -1.83 | 3.22E-06 | 6.33E-05 | ENSMUSG0000006108Lamp                    | protein_codi | 39984361 | 42181679   | inside       | 287695  | 287518           | shortestDistance |
| chr16 | 40290068 | 40290767 | 700  | -2.09 | 1.07E-06 | 2.48E-05 | ENSMUSG0000006108Lamp                    | protein_codi | 39984361 | 42181679   | inside       | 306057  | 305707           | shortestDistance |
| chr16 | 40739014 | 40739519 | 506  | -1.58 | 0.0014   | 0.00931  | ENSMUSG0000006108Lamp                    | protein_codi | 39984361 | 42181679   | inside       | 754905  | 754653           | shortestDistance |
| chr16 | 40959023 | 40959720 | 698  | -2.5  | 3.70E-05 | 0.000492 | ENSMUSG0000006108Lamp                    | protein_codi | 39984361 | 42181679   | inside       | 975011  | 974662           | shortestDistance |
| chr16 | 40968090 | 40968734 | 645  | -1.85 | 0.00141  | 0.00933  | ENSMUSG0000006108Lamp                    | protein_codi | 39984361 | 42181679   | inside       | 984051  | 983729           | shortestDistance |
| chr16 | 41258344 | 41258826 | 483  | -1.07 | 0.00458  | 0.0233   | ENSMUSG0000006108Lamp                    | protein_codi | 39984361 | 42181679   | inside       | 1274224 | 922853           | shortestDistance |
| chr16 | 41628939 | 41629438 | 500  | -1.15 | 0.00657  | 0.0308   | ENSMUSG0000006108Lamp                    | protein_codi | 39984361 | 42181679   | inside       | 1644827 | 552241           | shortestDistance |
| chr16 | 41827267 | 41827807 | 541  | -2.24 | 1.12E-06 | 2.59E-05 | ENSMUSG0000006108Lamp                    | protein_codi | 39984361 | 42181679   | inside       | 1843176 | 353872           | shortestDistance |
| chr16 | 41914180 | 41914768 | 589  | -2.31 | 4.35E-05 | 0.000563 | ENSMUSG0000006108Lamp                    | protein_codi | 39984361 | 42181679   | inside       | 1930113 | 266911           | shortestDistance |
| chr16 | 41929554 | 41929907 | 354  | -2.92 | 8.42E-07 | 2.03E-05 | ENSMUSG0000006108Lamp                    | protein_codi | 39984361 | 42181679   | inside       | 1945369 | 251772           | shortestDistance |
| chr16 | 42158642 | 42158927 | 286  | -1.44 | 0.00612  | 0.00485  | ENSMUSG0000006108Lamp                    | protein_codi | 39984361 | 42181679   | inside       | 2174423 | 22752            | shortestDistance |
| chr16 | 42337719 | 42337962 | 244  | -2.22 | 1.27E-05 | 0.000202 | ENSMUSG0000004726Gap43                   | protein_codi | 42248442 | 42340651   | inside       | 2811    | 2689             | shortestDistance |
| chr16 | 42592848 | 42593110 | 263  | 2.54  | 2.12E-05 | 0.00031  | ENSMUSG000000750749324120231processed_tr | 42725702     | 42875762 | downstream | 282783       | 132592  | shortestDistance |                  |
| chr16 | 42608225 | 42608607 | 383  | -1.49 | 9.08E-05 | 0.00103  | ENSMUSG000000750749324120231processed_tr | 42725702     | 42875762 | downstream | 267346       | 117095  | shortestDistance |                  |
| chr16 | 42676407 | 42677651 | 1245 | -1.07 | 0.00435  | 0.0224   | ENSMUSG000000750749324120231processed_tr | 42725702     | 42875762 | downstream | 198733       | 48051   | shortestDistance |                  |
| chr16 | 42772648 | 42772996 | 349  | -2.34 | 8.84E-08 | 3.00E-06 | ENSMUSG000000750749324120231processed_tr | 42725702     | 42875762 | inside     | 102940       | 46946   | shortestDistance |                  |
| chr16 | 42808830 | 42809249 | 420  | -1.73 | 1.82E-05 | 0.000273 | ENSMUSG000000750749324120231processed_tr | 42725702     | 42875762 | inside     | 66722        | 66513   | shortestDistance |                  |
| chr16 | 42919952 | 42920371 | 420  | -1.03 | 0.00367  | 0.0196   | ENSMUSG0000002270Zbtb20                  | protein_codi | 42875881 | 43642602   | inside       | 44281   | 44071            | shortestDistance |
| chr16 | 43217523 | 43217991 | 469  | -1.59 | 4.89E-05 | 0.00062  | ENSMUSG0000002270Zbtb20                  | protein_codi | 42875881 | 43642602   | inside       | 341876  | 341642           | shortestDistance |
| chr16 | 43303273 | 43303554 | 282  | -2.08 | 6.40E-06 | 0.000113 | ENSMUSG0000002270Zbtb20                  | protein_codi | 42875881 | 43642602   | inside       | 427533  | 339048           | shortestDistance |
| chr16 | 43506853 | 43507146 | 294  | -1.28 | 0.000926 | 0.00671  | ENSMUSG0000002270Zbtb20                  | protein_codi | 42875881 | 43642602   | inside       | 631119  | 135456           | shortestDistance |
| chr16 | 43580461 | 43580836 | 376  | 1.38  | 0.00121  | 0.00831  | ENSMUSG0000002270Zbtb20                  | protein_codi | 42875881 | 43642602   | inside       | 704767  | 61766            | shortestDistance |
| chr16 | 43654981 | 43655566 | 586  | 1.42  | 0.000927 | 0.00672  | ENSMUSG0000007155Tigit                   | protein_codi | 43648861 | 43664184   | inside       | 8910    | 6120             | shortestDistance |
| chr16 | 43801739 | 43802381 | 643  | -1.06 | 0.00174  | 0.0111   | ENSMUSG0000002270Drd3                    | protein_codi | 43762221 | 43822932   | inside       | 39839   | 20551            | shortestDistance |
| chr16 | 43970347 | 43970846 | 500  | -1.28 | 0.0105   | 0.044    | ENSMUSG0000003630Zdhc23                  | protein_codi | 43969078 | 43979093   | inside       | 8497    | 1269             | shortestDistance |
| chr16 | 44104241 | 44104724 | 484  | 3.53  | 2.05E-11 | 2.44E-09 | ENSMUSG0000005245Atp6v1a                 | protein_codi | 44085402 | 44139705   | inside       | 352223  | 18839            | shortestDistance |
| chr16 | 44356277 | 44356772 | 496  | 1.23  | 0.0113   | 0.0464   | ENSMUSG0000003617Cd200r1                 | protein_codi | 44347121 | 44388497   | inside       | 9403    | 9156             | shortestDistance |
| chr16 | 44404882 | 44405265 | 384  | 1.36  | 0.00323  | 0.0178   | ENSMUSG0000007155Cfap44                  | protein_codi | 44394796 | 44482428   | inside       | 10278   | 10086            | shortestDistance |
| chr16 | 44410251 | 44410545 | 295  | 1.85  | 0.000626 | 0.00493  | ENSMUSG0000007155Cfap44                  | protein_codi | 44394796 | 44482428   | inside       | 15602   | 15455            | shortestDistance |
| chr16 | 44457740 | 44458275 | 536  | 2.39  | 3.03E-08 | 1.21E-06 | ENSMUSG0000007155Cfap44                  | protein_codi | 44394796 | 44482428   | inside       | 63212   | 24153            | shortestDistance |
| chr16 | 44716880 | 44717255 | 376  | -1.07 | 0.00179  | 0.0113   | ENSMUSG0000003620Ncp94                   | protein_codi | 44724301 | 44737284   | upstream     | -7233   | 7046             | shortestDistance |
| chr16 | 44773619 | 44774047 | 429  | 1.95  | 3.24E-06 | 6.37E-05 | ENSMUSG0000002266Cd200r1                 | protein_codi | 44765736 | 44794978   | inside       | 8097    | 7883             | shortestDistance |
| chr16 | 44988615 | 44989438 | 824  | 2.25  | 2.31E-07 | 6.80E-06 | ENSMUSG0000003617Cd200r3                 | protein_codi | 44943678 | 44981380   | downstream   | 45348   | 7235             | shortestDistance |
| chr16 | 45018735 | 45019226 | 492  | 1.44  | 0.00076  | 0.00574  | ENSMUSG0000003617Cd200r3                 | protein_codi | 44943678 | 44981380   | downstream   | 75302   | 37355            | shortestDistance |
| chr16 | 45025235 | 45025837 | 603  | 0.92  | 0.00417  | 0.0216   | ENSMUSG0000003617Cd200r3                 | protein_codi | 44943678 | 44981380   | downstream   | 81858   | 43855            | shortestDistance |
| chr16 | 45148492 | 45149067 | 576  | 2.91  | 9.32E-13 | 1.71E-10 | ENSMUSG0000002266Sc35a5                  | protein_codi | 45139573 | 45158706   | inside       | 9926    | 8919             | shortestDistance |
| chr16 | 45223607 | 45224337 | 731  | 0.94  | 0.00566  | 0.0274   | ENSMUSG0000005201Btla                    | protein_codi | 45224315 | 45252895   | overlapStart | -343    | 22               | shortestDistance |
| chr16 | 45224632 | 45225049 | 418  | 1.12  | 0.00696  | 0.0322   | ENSMUSG0000005201Btla                    | protein_codi | 45224315 | 45252895   | inside       | 525     | 317              | shortestDistance |
| chr16 | 45231308 | 45231718 | 411  | 3.93  | 3.42E-15 | 1.74E-12 | ENSMUSG0000005201Btla                    | protein_codi | 45224315 | 45252895   | inside       | 7198    | 6993             | shortestDistance |
| chr16 | 45344790 | 45345192 | 403  | -1.11 | 0.01     | 0.0425   | ENSMUSG0000002266Cd200                   | protein_codi | 45382135 | 45409053   | downstream   | 64062   | 36943            | shortestDistance |
| chr16 | 45398034 | 45398385 | 352  | -2.61 | 1.04E-07 | 3.45E-06 | ENSMUSG0000002266Cd200                   | protein_codi | 45382135 | 45409053   | inside       | 10843   | 10668            | shortestDistance |
| chr16 | 45400485 | 45409196 | 792  | -1.08 | 0.00301  | 0.0169   | ENSMUSG0000002266Cd200                   | protein_codi | 45382135 | 45409053   | overlapStart | 253     | 143              | shortestDistance |
| chr16 | 45653816 | 45654340 | 525  | -0.99 | 0.00269  | 0.0154   | ENSMUSG0000003318BC016579                | protein_codi | 45626848 | 45654118   | overlapStart | 40      | 222              | shortestDistance |
| chr16 | 45711265 | 45711559 | 295  | -1.08 | 0.00578  | 0.0279   | ENSMUSG0000002265Tag1n3                  | protein_codi | 45711230 | 45724608   | inside       | 13196   | 35               | shortestDistance |





|       |          |          |      |       |          |          |                    |             |              |          |          |              |         |        |                  |
|-------|----------|----------|------|-------|----------|----------|--------------------|-------------|--------------|----------|----------|--------------|---------|--------|------------------|
| chr16 | 73350604 | 73351156 | 553  | -3.15 | 4.49E-09 | 2.32E-07 | ENSMUSG0000006483  | Gm25699     | snRNA        | 73422793 | 73422959 | downstream   | 72079   | 71637  | shortestDistance |
| chr16 | 73393869 | 73394135 | 267  | -1.28 | 0.00224  | 0.0135   | ENSMUSG0000006483  | Gm25699     | snRNA        | 73422793 | 73422959 | downstream   | 28957   | 28658  | shortestDistance |
| chr16 | 73591247 | 73591910 | 664  | -1.05 | 0.00439  | 0.0226   | ENSMUSG0000006483  | Gm25699     | snRNA        | 73422793 | 73422959 | upstream     | -168619 | 168288 | shortestDistance |
| chr16 | 73769732 | 73770099 | 368  | 1.35  | 0.00127  | 0.00862  | ENSMUSG0000005251  | Robo2       | protein_codi | 73892306 | 74411825 | downstream   | 641909  | 122207 | shortestDistance |
| chr16 | 73770445 | 73770957 | 513  | 1.13  | 0.00822  | 0.0366   | ENSMUSG0000005251  | Robo2       | protein_codi | 73892306 | 74411825 | downstream   | 641124  | 121349 | shortestDistance |
| chr16 | 73863745 | 73864339 | 595  | -1.6  | 1.69E-05 | 0.000256 | ENSMUSG0000005251  | Robo2       | protein_codi | 73892306 | 74411825 | downstream   | 547783  | 27967  | shortestDistance |
| chr16 | 73869614 | 73869859 | 246  | -2.43 | 4.33E-08 | 1.63E-06 | ENSMUSG0000005251  | Robo2       | protein_codi | 73892306 | 74411825 | downstream   | 542089  | 22447  | shortestDistance |
| chr16 | 73874858 | 73875758 | 901  | -1.1  | 0.000482 | 0.00401  | ENSMUSG0000005251  | Robo2       | protein_codi | 73892306 | 74411825 | downstream   | 536517  | 16548  | shortestDistance |
| chr16 | 73915222 | 73915807 | 586  | -2.08 | 0.000781 | 0.00587  | ENSMUSG0000005251  | Robo2       | protein_codi | 73892306 | 74411825 | inside       | 496311  | 22916  | shortestDistance |
| chr16 | 74167894 | 74168296 | 403  | -2.41 | 3.21E-08 | 1.27E-06 | ENSMUSG0000005251  | Robo2       | protein_codi | 73892306 | 74411825 | inside       | 243730  | 243529 | shortestDistance |
| chr16 | 74227345 | 74227584 | 240  | -1.6  | 8.46E-05 | 0.000968 | ENSMUSG0000005251  | Robo2       | protein_codi | 73892306 | 74411825 | inside       | 184361  | 184241 | shortestDistance |
| chr16 | 74231899 | 74232303 | 405  | -1.98 | 8.08E-06 | 0.000138 | ENSMUSG0000005251  | Robo2       | protein_codi | 73892306 | 74411825 | inside       | 179724  | 179522 | shortestDistance |
| chr16 | 74283585 | 74284096 | 512  | -1.47 | 0.000496 | 0.00411  | ENSMUSG0000005251  | Robo2       | protein_codi | 73892306 | 74411825 | inside       | 127985  | 127729 | shortestDistance |
| chr16 | 74411236 | 74412266 | 1031 | -1.57 | 1.57E-05 | 0.000241 | ENSMUSG0000005251  | Robo2       | protein_codi | 73892306 | 74411825 | overlapStart | 74      | 441    | shortestDistance |
| chr16 | 74412438 | 74413391 | 954  | -2.09 | 5.06E-07 | 1.32E-05 | ENSMUSG0000005251  | Robo2       | protein_codi | 73892306 | 74411825 | upstream     | -1089   | 613    | shortestDistance |
| chr16 | 74504432 | 74504855 | 424  | -1.16 | 0.00415  | 0.0216   | ENSMUSG0000005251  | Robo2       | protein_codi | 73892306 | 74411825 | upstream     | -92819  | 92607  | shortestDistance |
| chr16 | 74801182 | 74801750 | 569  | -1.64 | 1.78E-06 | 3.82E-05 | ENSMUSG0000009814  | Gm26937     | processed_p  | 74961240 | 74962247 | upstream     | -159774 | 159490 | shortestDistance |
| chr16 | 74840058 | 74840322 | 265  | -1.07 | 0.00599  | 0.0287   | ENSMUSG0000009814  | Gm26937     | processed_p  | 74961240 | 74962247 | upstream     | -121050 | 120918 | shortestDistance |
| chr16 | 74857826 | 74858245 | 420  | -0.99 | 0.00523  | 0.0258   | ENSMUSG0000009814  | Gm26937     | processed_p  | 74961240 | 74962247 | upstream     | -103204 | 102995 | shortestDistance |
| chr16 | 74900623 | 74901377 | 755  | -1.91 | 8.02E-09 | 3.84E-07 | ENSMUSG0000009814  | Gm26937     | processed_p  | 74961240 | 74962247 | upstream     | -60240  | 59863  | shortestDistance |
| chr16 | 75053871 | 75054440 | 570  | -1.21 | 0.000885 | 0.00647  | ENSMUSG0000009814  | Gm26937     | processed_p  | 74961240 | 74962247 | downstream   | 92916   | 91624  | shortestDistance |
| chr16 | 75092472 | 75093171 | 700  | -1.43 | 0.000169 | 0.00172  | ENSMUSG0000009814  | Gm26937     | processed_p  | 74961240 | 74962247 | downstream   | 131582  | 130225 | shortestDistance |
| chr16 | 75193250 | 75193733 | 484  | -1.19 | 0.00107  | 0.00751  | ENSMUSG0000009814  | Gm26937     | processed_p  | 74961240 | 74962247 | downstream   | 232252  | 231003 | shortestDistance |
| chr16 | 75293097 | 75293459 | 363  | 2.03  | 3.49E-07 | 9.66E-06 | ENSMUSG0000003294  | Upl         | protein_codi | 75540514 | 75586061 | downstream   | 292783  | 247055 | shortestDistance |
| chr16 | 75325333 | 75325721 | 389  | -1.12 | 0.00191  | 0.0119   | ENSMUSG0000003294  | Upl         | protein_codi | 75540514 | 75586061 | downstream   | 260534  | 214793 | shortestDistance |
| chr16 | 75333851 | 75334755 | 905  | -1.09 | 0.00772  | 0.0348   | ENSMUSG0000003294  | Upl         | protein_codi | 75540514 | 75586061 | downstream   | 251758  | 205759 | shortestDistance |
| chr16 | 75362141 | 75362456 | 316  | -0.98 | 0.00429  | 0.0221   | ENSMUSG0000003294  | Upl         | protein_codi | 75540514 | 75586061 | downstream   | 223763  | 178058 | shortestDistance |
| chr16 | 75612475 | 75612884 | 410  | 2.52  | 2.01E-07 | 6.06E-06 | ENSMUSG0000003294  | Rbm11       | protein_codi | 75592844 | 75602829 | downstream   | 19836   | 9646   | shortestDistance |
| chr16 | 75855388 | 75856246 | 859  | 0.87  | 0.00477  | 0.024    | ENSMUSG0000002287  | Samsn1      | protein_codi | 75858793 | 76022281 | downstream   | 166464  | 2547   | shortestDistance |
| chr16 | 75865547 | 75866071 | 525  | -0.93 | 0.00695  | 0.0321   | ENSMUSG0000002287  | Samsn1      | protein_codi | 75858793 | 76022281 | inside       | 156472  | 6754   | shortestDistance |
| chr16 | 75872104 | 75872622 | 519  | 3.75  | 6.08E-13 | 1.21E-10 | ENSMUSG0000002287  | Samsn1      | protein_codi | 75858793 | 76022281 | inside       | 149918  | 13311  | shortestDistance |
| chr16 | 75886380 | 75886663 | 284  | 1.62  | 0.000119 | 0.00129  | ENSMUSG0000002287  | Samsn1      | protein_codi | 75858793 | 76022281 | inside       | 135759  | 27587  | shortestDistance |
| chr16 | 75886951 | 75887582 | 632  | 0.99  | 0.00416  | 0.0216   | ENSMUSG0000002287  | Samsn1      | protein_codi | 75858793 | 76022281 | inside       | 135015  | 28158  | shortestDistance |
| chr16 | 75933403 | 75933751 | 349  | 3.05  | 6.78E-12 | 9.47E-10 | ENSMUSG0000002287  | Samsn1      | protein_codi | 75858793 | 76022281 | inside       | 88704   | 74610  | shortestDistance |
| chr16 | 75960932 | 75961785 | 854  | 1.99  | 1.13E-05 | 0.000184 | ENSMUSG0000002287  | Samsn1      | protein_codi | 75858793 | 76022281 | inside       | 60923   | 60496  | shortestDistance |
| chr16 | 75983808 | 75984246 | 439  | 1.54  | 0.000146 | 0.00153  | ENSMUSG0000002287  | Samsn1      | protein_codi | 75858793 | 76022281 | inside       | 38254   | 38035  | shortestDistance |
| chr16 | 76111743 | 76112299 | 557  | -1.08 | 0.00473  | 0.0238   | ENSMUSG00000010364 | Gm37705     | TEC          | 76116891 | 76118550 | upstream     | -4870   | 4592   | shortestDistance |
| chr16 | 76130026 | 76130311 | 286  | 1.17  | 0.0283   | 0.0161   | ENSMUSG00000007719 | Gm22268     | snRNA        | 76132541 | 76132671 | downstream   | 2503    | 2230   | shortestDistance |
| chr16 | 76433054 | 76433414 | 361  | -1.81 | 4.20E-05 | 0.000547 | ENSMUSG00000010933 | Gm45030     | lincRNA      | 76427745 | 76502909 | inside       | 69675   | 5309   | shortestDistance |
| chr16 | 76506269 | 76506623 | 355  | -1.53 | 0.00015  | 0.00156  | ENSMUSG00000010933 | Gm45030     | lincRNA      | 76427745 | 76502909 | upstream     | -3537   | 3360   | shortestDistance |
| chr16 | 76527105 | 76527966 | 862  | 1.78  | 4.83E-07 | 1.27E-05 | ENSMUSG00000010933 | Gm45030     | lincRNA      | 76427745 | 76502909 | upstream     | -24627  | 24196  | shortestDistance |
| chr16 | 76539529 | 76540107 | 579  | 2.79  | 8.33E-13 | 1.57E-10 | ENSMUSG00000010933 | Gm45030     | lincRNA      | 76427745 | 76502909 | upstream     | -36909  | 36620  | shortestDistance |
| chr16 | 77028132 | 77028627 | 496  | -0.93 | 0.00631  | 0.0298   | ENSMUSG0000002286  | Usp25       | protein_codi | 77014069 | 77116779 | inside       | 14311   | 14063  | shortestDistance |
| chr16 | 77034685 | 77035072 | 388  | 3.31  | 8.51E-14 | 2.40E-11 | ENSMUSG0000002286  | Usp25       | protein_codi | 77014069 | 77116779 | inside       | 20809   | 20616  | shortestDistance |
| chr16 | 77084037 | 77084587 | 551  | 3.25  | 6.35E-16 | 4.35E-13 | ENSMUSG0000002286  | Usp25       | protein_codi | 77014069 | 77116779 | inside       | 70243   | 32192  | shortestDistance |
| chr16 | 77174731 | 77175360 | 630  | 2.77  | 4.08E-14 | 1.30E-11 | ENSMUSG0000002286  | Usp25       | protein_codi | 77014069 | 77116779 | downstream   | 160977  | 57952  | shortestDistance |
| chr16 | 77236805 | 77237548 | 744  | -1.05 | 0.00482  | 0.0242   | ENSMUSG0000009038  | Mir99ahg    | processed_tr | 77236317 | 77691403 | inside       | 859     | 488    | shortestDistance |
| chr16 | 77318228 | 77318601 | 374  | 1.18  | 0.00269  | 0.0154   | ENSMUSG0000009038  | Mir99ahg    | processed_tr | 77236317 | 77691403 | inside       | 82097   | 81911  | shortestDistance |
| chr16 | 77364458 | 77364835 | 378  | 2.13  | 5.30E-07 | 1.37E-05 | ENSMUSG0000009038  | Mir99ahg    | processed_tr | 77236317 | 77691403 | inside       | 128329  | 128141 | shortestDistance |
| chr16 | 77369687 | 77370166 | 480  | 2.18  | 1.91E-07 | 5.80E-06 | ENSMUSG0000009038  | Mir99ahg    | processed_tr | 77236317 | 77691403 | inside       | 133609  | 133370 | shortestDistance |
| chr16 | 77393459 | 77394003 | 545  | -1.05 | 0.00454  | 0.0231   | ENSMUSG0000009038  | Mir99ahg    | processed_tr | 77236317 | 77691403 | inside       | 157414  | 157142 | shortestDistance |
| chr16 | 77443371 | 77443697 | 327  | 1.39  | 0.00314  | 0.0174   | ENSMUSG0000009038  | Mir99ahg    | processed_tr | 77236317 | 77691403 | inside       | 207217  | 207054 | shortestDistance |
| chr16 | 77499658 | 77500309 | 652  | -1.23 | 0.00174  | 0.011    | ENSMUSG0000009038  | Mir99ahg    | processed_tr | 77236317 | 77691403 | inside       | 263667  | 191094 | shortestDistance |
| chr16 | 77500419 | 77500671 | 253  | -1.42 | 0.000468 | 0.00392  | ENSMUSG0000009038  | Mir99ahg    | processed_tr | 77236317 | 77691403 | inside       | 264228  | 190732 | shortestDistance |
| chr16 | 77643017 | 77643545 | 529  | 1.71  | 2.80E-07 | 8.02E-06 | ENSMUSG0000009038  | Mir99ahg    | processed_tr | 77236317 | 77691403 | inside       | 406964  | 47858  | shortestDistance |
| chr16 | 77719284 | 77719635 | 352  | -1.33 | 0.00498  | 0.0248   | ENSMUSG0000009038  | Mir99ahg    | processed_tr | 77236317 | 77691403 | downstream   | 483143  | 27881  | shortestDistance |
| chr16 | 78156593 | 78156895 | 303  | -1.75 | 0.000126 | 0.00135  | ENSMUSG00000007745 | Gm25916     | snRNA        | 78240258 | 78240388 | upstream     | -83514  | 83363  | shortestDistance |
| chr16 | 78216736 | 78218071 | 1336 | -0.9  | 0.0117   | 0.0476   | ENSMUSG00000007745 | Gm25916     | snRNA        | 78240258 | 78240388 | upstream     | -22854  | 22187  | shortestDistance |
| chr16 | 78237754 | 78238573 | 820  | -0.95 | 0.00232  | 0.0138   | ENSMUSG00000007745 | Gm25916     | snRNA        | 78240258 | 78240388 | upstream     | -2094   | 1685   | shortestDistance |
| chr16 | 78264537 | 78265585 | 1049 | -1.1  | 4.00E-04 | 0.00346  | ENSMUSG00000010984 | E330011021  | processed_tr | 78250861 | 78302487 | inside       | 37426   | 13676  | shortestDistance |
| chr16 | 78267458 | 78267891 | 434  | 0.94  | 0.0118   | 0.0481   | ENSMUSG00000010984 | E330011021  | processed_tr | 78250861 | 78302487 | inside       | 34813   | 16597  | shortestDistance |
| chr16 | 78284471 | 78284727 | 257  | -1.31 | 0.00648  | 0.0305   | ENSMUSG00000010984 | E330011021  | processed_tr | 78250861 | 78302487 | inside       | 17888   | 17760  | shortestDistance |
| chr16 | 78294873 | 78295251 | 379  | -1.07 | 0.00321  | 0.0177   | ENSMUSG00000010984 | E330011021  | processed_tr | 78250861 | 78302487 | inside       | 7425    | 7236   | shortestDistance |
| chr16 | 78375236 | 78375519 | 284  | -0.83 | 0.00851  | 0.0375   | ENSMUSG0000002286  | Btg3        | protein_codi | 78359860 | 78377192 | inside       | 1814    | 1673   | shortestDistance |
| chr16 | 78391185 | 78391703 | 519  | 1.36  | 0.00161  | 0.0104   | ENSMUSG0000002286  | Btg3        | protein_codi | 78359860 | 78377192 | upstream     | -14252  | 13993  | shortestDistance |
| chr16 | 78546329 | 78547121 | 793  | -1.22 | 0.00015  | 0.00156  | ENSMUSG0000002286  | D16Ertd472e | protein_codi | 78544012 | 78576657 | inside       | 29932   | 2317   | shortestDistance |
| chr16 | 78637029 | 78637364 | 336  | -0.86 | 0.012    | 0.0487   | ENSMUSG0000009398  | Gm24861     | snRNA        | 78624747 | 78624853 | downstream   | 12449   | 12176  | shortestDistance |
| chr16 | 78644786 | 78645067 | 282  | -1.4  | 0.00382  | 0.0202   | ENSMUSG0000009398  | Gm24861     | snRNA        | 78624747 | 78624853 | downstream   | 20179   | 19933  | shortestDistance |
| chr16 | 78690576 | 78691219 | 644  | -1.78 | 4.53E-06 | 8.44E-05 | ENSMUSG0000009398  | Gm24861     | snRNA        | 78624747 | 78624853 | downstream   | 66151   | 65723  | shortestDistance |
| chr16 | 78930062 | 78931601 | 1000 | -1.39 | 0.00227  | 0.0136   | ENSMUSG0000002286  | Chodl</     |              |          |          |              |         |        |                  |

|       |          |          |      |       |          |          |                   |            |              |          |          |              |         |        |                  |
|-------|----------|----------|------|-------|----------|----------|-------------------|------------|--------------|----------|----------|--------------|---------|--------|------------------|
| chr16 | 85393539 | 85393868 | 330  | -1.52 | 0.000682 | 0.00528  | ENSMUSG0000004113 | Cyr1       | protein_codi | 85421533 | 85553397 | downstream   | 159693  | 27665  | shortestDistance |
| chr16 | 85415445 | 85415828 | 384  | -2.16 | 9.56E-06 | 0.000159 | ENSMUSG0000004113 | Cyr1       | protein_codi | 85421533 | 85553397 | downstream   | 137761  | 5705   | shortestDistance |
| chr16 | 85507047 | 85507885 | 839  | -2.15 | 2.69E-08 | 1.10E-06 | ENSMUSG0000004113 | Cyr1       | protein_codi | 85421533 | 85553397 | inside       | 45931   | 45512  | shortestDistance |
| chr16 | 85537257 | 85537580 | 324  | -1.23 | 0.00593  | 0.0284   | ENSMUSG0000004113 | Cyr1       | protein_codi | 85421533 | 85553397 | inside       | 15979   | 15817  | shortestDistance |
| chr16 | 85538309 | 85538850 | 542  | -1.71 | 1.02E-05 | 0.000168 | ENSMUSG0000004113 | Cyr1       | protein_codi | 85421533 | 85553397 | inside       | 14817   | 14547  | shortestDistance |
| chr16 | 85543749 | 85544090 | 342  | -1.23 | 0.00288  | 0.0163   | ENSMUSG0000004113 | Cyr1       | protein_codi | 85421533 | 85553397 | inside       | 9477    | 9307   | shortestDistance |
| chr16 | 85549816 | 85550673 | 858  | -1.36 | 0.000945 | 0.00682  | ENSMUSG0000004113 | Cyr1       | protein_codi | 85421533 | 85553397 | inside       | 3153    | 2724   | shortestDistance |
| chr16 | 85566510 | 85566854 | 345  | -1.51 | 0.000616 | 0.00487  | ENSMUSG0000008969 | Gm2541     | processed_g  | 85553233 | 85553943 | upstream     | -12739  | 12567  | shortestDistance |
| chr16 | 85668680 | 85668998 | 319  | -1.99 | 1.64E-05 | 0.00025  | ENSMUSG0000008969 | Gm2541     | processed_g  | 85553233 | 85553943 | upstream     | -114896 | 114737 | shortestDistance |
| chr16 | 85756075 | 85756420 | 346  | -1.39 | 0.000356 | 0.00315  | ENSMUSG0000002289 | Adamt1     | protein_codi | 85793827 | 85803113 | downstream   | 46865   | 37407  | shortestDistance |
| chr16 | 85779794 | 85780096 | 303  | -1.38 | 0.000422 | 0.00362  | ENSMUSG0000002289 | Adamt1     | protein_codi | 85793827 | 85803113 | downstream   | 23168   | 13731  | shortestDistance |
| chr16 | 85791765 | 85792260 | 496  | -1.71 | 2.34E-05 | 0.000337 | ENSMUSG0000002289 | Adamt1     | protein_codi | 85793827 | 85803113 | downstream   | 11101   | 1567   | shortestDistance |
| chr16 | 85801188 | 85801742 | 555  | -1.13 | 0.00193  | 0.012    | ENSMUSG0000002289 | Adamt1     | protein_codi | 85793827 | 85803113 | inside       | 1648    | 1371   | shortestDistance |
| chr16 | 85801965 | 85802296 | 332  | -1.1  | 0.00206  | 0.0126   | ENSMUSG0000002289 | Adamt1     | protein_codi | 85793827 | 85803113 | inside       | 983     | 817    | shortestDistance |
| chr16 | 85802412 | 85802649 | 238  | -1.08 | 0.00341  | 0.0185   | ENSMUSG0000002289 | Adamt1     | protein_codi | 85793827 | 85803113 | inside       | 583     | 464    | shortestDistance |
| chr16 | 85803009 | 85803377 | 369  | -1.11 | 0.000967 | 0.00695  | ENSMUSG0000002289 | Adamt1     | protein_codi | 85793827 | 85803113 | overlapStart | -80     | 104    | shortestDistance |
| chr16 | 85820101 | 85820467 | 367  | -1.37 | 0.000499 | 0.00412  | ENSMUSG0000002289 | Adamt1     | protein_codi | 85793827 | 85803113 | upstream     | -17171  | 16988  | shortestDistance |
| chr16 | 85864598 | 85865593 | 996  | -1.1  | 0.00601  | 0.0287   | ENSMUSG0000002289 | Adamt5     | protein_codi | 85858170 | 85901125 | inside       | 36029   | 6428   | shortestDistance |
| chr16 | 85899929 | 85900343 | 415  | -0.95 | 0.0117   | 0.0478   | ENSMUSG0000002289 | Adamt5     | protein_codi | 85858170 | 85901125 | inside       | 989     | 782    | shortestDistance |
| chr16 | 86261524 | 86262021 | 498  | -2.3  | 2.10E-08 | 8.82E-07 | ENSMUSG0000002289 | Adamt5     | protein_codi | 85858170 | 85901125 | upstream     | -360647 | 360399 | shortestDistance |
| chr16 | 86364090 | 86364677 | 588  | -2.01 | 3.06E-06 | 6.06E-05 | ENSMUSG0000002289 | Adamt5     | protein_codi | 85858170 | 85901125 | upstream     | -463259 | 462965 | shortestDistance |
| chr16 | 86403573 | 86404016 | 444  | -1.27 | 0.00114  | 0.0079   | ENSMUSG0000008925 | Gm25715    | snoRNA       | 86845470 | 86845594 | upstream     | -441676 | 441454 | shortestDistance |
| chr16 | 86444573 | 86445097 | 525  | -2.05 | 5.27E-07 | 1.36E-05 | ENSMUSG0000008925 | Gm25715    | snoRNA       | 86845470 | 86845594 | upstream     | -400635 | 400373 | shortestDistance |
| chr16 | 86457388 | 86457605 | 218  | -2.36 | 2.90E-05 | 0.000402 | ENSMUSG0000008925 | Gm25715    | snoRNA       | 86845470 | 86845594 | upstream     | -387974 | 387865 | shortestDistance |
| chr16 | 86535843 | 86536366 | 524  | -2.75 | 7.34E-09 | 3.57E-07 | ENSMUSG0000008925 | Gm25715    | snoRNA       | 86845470 | 86845594 | upstream     | -309366 | 309104 | shortestDistance |
| chr16 | 86644852 | 86645309 | 458  | -0.96 | 0.0115   | 0.0471   | ENSMUSG0000008925 | Gm25715    | snoRNA       | 86845470 | 86845594 | upstream     | -200390 | 200161 | shortestDistance |
| chr16 | 86821207 | 86821858 | 652  | -1.65 | 0.000984 | 0.00705  | ENSMUSG0000008925 | Gm25715    | snoRNA       | 86845470 | 86845594 | upstream     | -23938  | 23612  | shortestDistance |
| chr16 | 87049806 | 87050304 | 499  | -1.41 | 0.00125  | 0.00853  | ENSMUSG0000008925 | Gm25715    | snoRNA       | 86845470 | 86845594 | downstream   | 204585  | 204212 | shortestDistance |
| chr16 | 87128413 | 87128784 | 647  | -1.33 | 0.000313 | 0.00284  | ENSMUSG0000004444 | N6amt1     | protein_codi | 87354185 | 87368742 | upstream     | -225724 | 225401 | shortestDistance |
| chr16 | 87246405 | 87246854 | 450  | -1.43 | 0.000217 | 0.00211  | ENSMUSG0000004444 | N6amt1     | protein_codi | 87354185 | 87368742 | upstream     | -107555 | 107331 | shortestDistance |
| chr16 | 87249949 | 87250277 | 329  | -1.22 | 0.000975 | 0.00699  | ENSMUSG0000004444 | N6amt1     | protein_codi | 87354185 | 87368742 | upstream     | -104072 | 103908 | shortestDistance |
| chr16 | 87263054 | 87263390 | 337  | -2.28 | 8.31E-06 | 0.000141 | ENSMUSG0000004444 | N6amt1     | protein_codi | 87354185 | 87368742 | upstream     | -90963  | 90795  | shortestDistance |
| chr16 | 87263557 | 87263848 | 292  | -1.69 | 1.65E-05 | 0.000251 | ENSMUSG0000004444 | N6amt1     | protein_codi | 87354185 | 87368742 | upstream     | -90483  | 90337  | shortestDistance |
| chr16 | 87272397 | 87272874 | 478  | -1.15 | 0.00462  | 0.0234   | ENSMUSG0000004444 | N6amt1     | protein_codi | 87354185 | 87368742 | upstream     | -81549  | 81311  | shortestDistance |
| chr16 | 87284861 | 87285565 | 705  | -0.99 | 0.00462  | 0.0234   | ENSMUSG0000004444 | N6amt1     | protein_codi | 87354185 | 87368742 | upstream     | -68972  | 68620  | shortestDistance |
| chr16 | 87585504 | 87586313 | 810  | 2.23  | 1.23E-08 | 5.62E-07 | ENSMUSG0000002561 | Map3k7c1   | protein_codi | 87553330 | 87595336 | inside       | 32578   | 9023   | shortestDistance |
| chr16 | 87607483 | 87607701 | 219  | 1.75  | 1.88E-05 | 0.000281 | ENSMUSG0000002561 | Map3k7c1   | protein_codi | 87553330 | 87595336 | downstream   | 54262   | 12147  | shortestDistance |
| chr16 | 87610185 | 87610681 | 497  | -1.15 | 0.00271  | 0.0155   | ENSMUSG0000006467 | Gm22808    | sRNA         | 87621014 | 87621120 | downstream   | 10687   | 10333  | shortestDistance |
| chr16 | 87611606 | 87611911 | 306  | 3.8   | 2.98E-16 | 2.39E-13 | ENSMUSG0000006467 | Gm22808    | sRNA         | 87621014 | 87621120 | downstream   | 9362    | 9103   | shortestDistance |
| chr16 | 87612121 | 87612907 | 787  | 3.64  | 4.13E-19 | 1.34E-15 | ENSMUSG0000006467 | Gm22808    | sRNA         | 87621014 | 87621120 | downstream   | 8606    | 8107   | shortestDistance |
| chr16 | 87624904 | 87625787 | 884  | 1.27  | 0.000346 | 0.00308  | ENSMUSG0000006467 | Gm22808    | sRNA         | 87621014 | 87621120 | upstream     | -4226   | 3784   | shortestDistance |
| chr16 | 87655597 | 87655962 | 366  | -0.98 | 0.00555  | 0.027    | ENSMUSG0000006467 | Gm22808    | sRNA         | 87621014 | 87621120 | upstream     | -34660  | 34477  | shortestDistance |
| chr16 | 87681342 | 87682244 | 883  | 1.1   | 0.00425  | 0.022    | ENSMUSG0000002561 | Bach1      | protein_codi | 87698945 | 87733346 | upstream     | -17162  | 16721  | shortestDistance |
| chr16 | 87738008 | 87738313 | 306  | 2.22  | 4.67E-06 | 8.67E-05 | ENSMUSG0000002561 | Bach1      | protein_codi | 87698945 | 87733346 | downstream   | 39215   | 4662   | shortestDistance |
| chr16 | 87777785 | 87778198 | 414  | -1.31 | 0.00118  | 0.00814  | ENSMUSG0000005597 | 2810407A14 | lincRNA      | 87784075 | 87839293 | upstream     | -6083   | 5877   | shortestDistance |
| chr16 | 88657417 | 88657684 | 268  | -1.16 | 0.00374  | 0.0199   | ENSMUSG0000007147 | Krtap26-1  | protein_codi | 88646824 | 88647796 | upstream     | -9754   | 9621   | shortestDistance |
| chr16 | 89763829 | 89764172 | 344  | 1.54  | 0.000286 | 0.00264  | ENSMUSG0000000248 | Tiam1      | protein_codi | 89787111 | 89980080 | downstream   | 216080  | 22939  | shortestDistance |
| chr16 | 89848290 | 89849518 | 1229 | 0.96  | 0.00396  | 0.0208   | ENSMUSG0000000248 | Tiam1      | protein_codi | 89787111 | 89980080 | inside       | 131176  | 61179  | shortestDistance |
| chr16 | 89938145 | 89938814 | 670  | -1.05 | 0.00158  | 0.0102   | ENSMUSG0000000248 | Tiam1      | protein_codi | 89787111 | 89980080 | inside       | 41600   | 41266  | shortestDistance |
| chr16 | 89980283 | 89980846 | 564  | 3.27  | 2.18E-16 | 1.90E-13 | ENSMUSG0000000248 | Tiam1      | protein_codi | 89787111 | 89980080 | upstream     | -484    | 203    | shortestDistance |
| chr16 | 90041037 | 90041312 | 276  | -1.24 | 0.00022  | 0.00214  | ENSMUSG0000000248 | Tiam1      | protein_codi | 89787111 | 89980080 | upstream     | -61094  | 60957  | shortestDistance |
| chr16 | 90090400 | 90090702 | 303  | 1.09  | 0.0113   | 0.0467   | ENSMUSG0000000248 | Tiam1      | protein_codi | 89787111 | 89980080 | upstream     | -110471 | 110320 | shortestDistance |
| chr16 | 90112831 | 90113459 | 629  | 3.54  | 9.37E-16 | 5.94E-13 | ENSMUSG0000000229 | Sod1       | protein_codi | 90220742 | 90226322 | upstream     | -107597 | 107283 | shortestDistance |
| chr16 | 90198677 | 90199608 | 932  | 0.94  | 0.00586  | 0.0282   | ENSMUSG0000002298 | Sod1       | protein_codi | 90220742 | 90226322 | upstream     | -21600  | 21134  | shortestDistance |
| chr16 | 90315852 | 90316251 | 400  | 1.47  | 0.000387 | 0.00337  | ENSMUSG0000002298 | Sca4       | protein_codi | 90228957 | 90284425 | upstream     | -31627  | 31427  | shortestDistance |
| chr16 | 90396191 | 90396581 | 391  | 1.09  | 0.00994  | 0.0423   | ENSMUSG0000005341 | Hunk       | protein_codi | 90386397 | 90499553 | inside       | 9989    | 9794   | shortestDistance |
| chr16 | 90435237 | 90435704 | 468  | 2.22  | 7.80E-08 | 2.69E-06 | ENSMUSG0000005341 | Hunk       | protein_codi | 90386397 | 90499553 | inside       | 49073   | 48840  | shortestDistance |
| chr16 | 90459025 | 90459644 | 620  | 1.81  | 6.85E-05 | 0.000819 | ENSMUSG0000005341 | Hunk       | protein_codi | 90386397 | 90499553 | inside       | 72937   | 39909  | shortestDistance |
| chr16 | 90892132 | 90892383 | 252  | -1.51 | 0.00121  | 0.00829  | ENSMUSG0000003990 | Eva1c      | protein_codi | 90826719 | 90905109 | inside       | 65539   | 12726  | shortestDistance |
| chr16 | 91023454 | 91023710 | 257  | 1.66  | 0.00103  | 0.00732  | ENSMUSG0000002297 | Paxbp1     | protein_codi | 91014037 | 91044543 | inside       | 20961   | 9417   | shortestDistance |
| chr16 | 91061614 | 91062003 | 390  | 1.05  | 0.00444  | 0.0228   | ENSMUSG0000003985 | 4932438H23 | protein_codi | 91053935 | 91095122 | inside       | 33314   | 7679   | shortestDistance |
| chr16 | 91064629 | 91065007 | 379  | 1.11  | 0.00602  | 0.0288   | ENSMUSG0000003985 | 4932438H23 | protein_codi | 91053935 | 91095122 | inside       | 30304   | 10694  | shortestDistance |
| chr16 | 91086645 | 91087093 | 449  | 1.16  | 0.00259  | 0.015    | ENSMUSG0000003985 | 4932438H23 | protein_codi | 91053935 | 91095122 | inside       | 8253    | 8029   | shortestDistance |
| chr16 | 91352731 | 91353048 | 318  | 1.24  | 0.000516 | 0.00423  | ENSMUSG0000006581 | Gm24695    | sRNA         | 91349702 | 91349784 | upstream     | -3106   | 2947   | shortestDistance |
| chr16 | 91412877 | 91413448 | 572  | 1.07  | 0.00354  | 0.019    | ENSMUSG0000002296 | Il10rb     | protein_codi | 91406164 | 91425834 | inside       | 6998    | 6713   | shortestDistance |
| chr16 | 91433506 | 91433907 | 402  | 1.17  | 0.00569  | 0.0275   | ENSMUSG0000002296 | Il10rb     | protein_codi | 91406164 | 91425834 | downstream   | 27542   | 7672   | shortestDistance |
| chr16 | 91464654 | 91465273 | 620  | 0.92  | 0.00507  | 0.0252   | ENSMUSG0000008486 | 9A30006K02 | processed_tr | 91465104 | 91470121 | overlapStart | -140    | 169    | shortestDistance |
| chr16 | 91522022 | 91522441 | 420  | 1.24  | 0.00217  | 0.0131   | ENSMUSG0000000293 | Mir6367    | miRNA        | 91527443 | 91527544 | downstream   | 5312    | 5002   | shortestDistance |
| chr16 | 91522497 | 91522852 | 356  | 1.24  | 0.000412 | 0.00354  | ENSMUSG0000009930 | Mir6367    | miRNA        | 91527443 | 91527544 | downstream   | 4870    | 4591   | shortestDistance |
| chr16 | 91606937 | 91607415 | 479  | 2.7   | 6.78E-09 | 3.34E-07 | ENSMUSG0000008533 | Gm15964    | processed_tr | 91611468 | 91623861 | upstream     | -4292   | 4053   | shortestDistance |
| chr16 | 91611243 |          |      |       |          |          |                   |            |              |          |          |              |         |        |                  |

|       |          |          |      |       |          |          |                                    |               |          |            |              |        |                  |                  |
|-------|----------|----------|------|-------|----------|----------|------------------------------------|---------------|----------|------------|--------------|--------|------------------|------------------|
| chr16 | 94222772 | 94223857 | 1086 | 1.52  | 4.59E-06 | 8.54E-05 | ENSMUSG0000011504CT573086.2        | TEC           | 94218021 | 94223012   | overlapStart | -302   | 240              | shortestDistance |
| chr16 | 94241067 | 94241544 | 478  | 1.89  | 0.000148 | 0.00155  | ENSMUSG0000004082Hlcs              | protein_codi  | 94128882 | 94313571   | inside       | 72265  | 72027            | shortestDistance |
| chr16 | 94497914 | 94498427 | 514  | 1.59  | 8.84E-05 | 0.001    | ENSMUSG0000002289Dscr3             | protein_codi  | 94497783 | 94526830   | inside       | 28660  | 131              | shortestDistance |
| chr16 | 94504203 | 94504683 | 481  | 1.16  | 0.00368  | 0.0197   | ENSMUSG0000002289Dscr3             | protein_codi  | 94497783 | 94526830   | inside       | 22387  | 6420             | shortestDistance |
| chr16 | 94518945 | 94519827 | 883  | 1.36  | 0.000274 | 0.00255  | ENSMUSG0000002289Dscr3             | protein_codi  | 94497783 | 94526830   | inside       | 7444   | 7003             | shortestDistance |
| chr16 | 94526134 | 94527201 | 1068 | 1.09  | 0.0021   | 0.0128   | ENSMUSG0000002289Dscr3             | protein_codi  | 94497783 | 94526830   | overlapStart | 162    | 371              | shortestDistance |
| chr16 | 94556153 | 94556658 | 506  | 2.08  | 1.89E-07 | 5.75E-06 | ENSMUSG0000002289DyrK1a            | protein_codi  | 94570010 | 94695517   | upstream     | -13604 | 13352            | shortestDistance |
| chr16 | 94559376 | 94559810 | 435  | 1.2   | 0.000697 | 0.00537  | ENSMUSG0000002289DyrK1a            | protein_codi  | 94570010 | 94695517   | upstream     | -10417 | 10200            | shortestDistance |
| chr16 | 94568900 | 94570128 | 1229 | 1.22  | 0.000431 | 0.00367  | ENSMUSG0000002289DyrK1a            | protein_codi  | 94570010 | 94695517   | overlapStart | -496   | 118              | shortestDistance |
| chr16 | 94618563 | 94618868 | 306  | 1.16  | 0.00412  | 0.0215   | ENSMUSG0000002289DyrK1a            | protein_codi  | 94570010 | 94695517   | inside       | 48706  | 48553            | shortestDistance |
| chr16 | 94647095 | 94647542 | 448  | 1.81  | 2.00E-05 | 0.000296 | ENSMUSG0000002289DyrK1a            | protein_codi  | 94570010 | 94695517   | inside       | 77308  | 47975            | shortestDistance |
| chr16 | 94647866 | 94648273 | 408  | 2.93  | 1.29E-09 | 7.99E-08 | ENSMUSG0000002289DyrK1a            | protein_codi  | 94570010 | 94695517   | inside       | 78060  | 47244            | shortestDistance |
| chr16 | 94773965 | 94774323 | 359  | 2.26  | 5.13E-07 | 1.33E-05 | ENSMUSG0000004330Kcnj6             | protein_codi  | 94749266 | 94997696   | inside       | 223552 | 24699            | shortestDistance |
| chr16 | 95275648 | 95276137 | 490  | 2.83  | 5.79E-09 | 2.90E-07 | ENSMUSG0000006260Kcnj15            | protein_codi  | 95257558 | 95300260   | inside       | 18334  | 18090            | shortestDistance |
| chr16 | 95283988 | 95284747 | 760  | 1.32  | 0.00039  | 0.00339  | ENSMUSG0000006260Kcnj15            | protein_codi  | 95257558 | 95300260   | inside       | 26810  | 15513            | shortestDistance |
| chr16 | 95289326 | 95289692 | 367  | 1.39  | 0.00151  | 0.00985  | ENSMUSG0000006260Kcnj15            | protein_codi  | 95257558 | 95300260   | inside       | 31951  | 10568            | shortestDistance |
| chr16 | 95297624 | 95298018 | 395  | 1.12  | 0.00473  | 0.0239   | ENSMUSG0000006260Kcnj15            | protein_codi  | 95257558 | 95300260   | inside       | 40263  | 2242             | shortestDistance |
| chr16 | 95342048 | 95342303 | 256  | 1.64  | 0.000473 | 0.00395  | ENSMUSG0000004073Erg               | protein_codi  | 95359169 | 95586593   | downstream   | 244417 | 16866            | shortestDistance |
| chr16 | 95349724 | 95350446 | 723  | 2.42  | 5.94E-09 | 2.96E-07 | ENSMUSG0000004073Erg               | protein_codi  | 95359169 | 95586593   | downstream   | 236508 | 8723             | shortestDistance |
| chr16 | 95374883 | 95375246 | 364  | 1.87  | 0.00194  | 0.012    | ENSMUSG0000004073Erg               | protein_codi  | 95359169 | 95586593   | inside       | 211529 | 15714            | shortestDistance |
| chr16 | 95385376 | 95385798 | 423  | 1.18  | 0.0105   | 0.0441   | ENSMUSG0000004073Erg               | protein_codi  | 95359169 | 95586593   | inside       | 201006 | 26207            | shortestDistance |
| chr16 | 95388338 | 95388721 | 384  | 3.2   | 1.93E-10 | 1.61E-08 | ENSMUSG0000004073Erg               | protein_codi  | 95359169 | 95586593   | inside       | 198063 | 29169            | shortestDistance |
| chr16 | 95401800 | 95402187 | 388  | 1.3   | 0.00102  | 0.00726  | ENSMUSG0000004073Erg               | protein_codi  | 95359169 | 95586593   | inside       | 184599 | 42631            | shortestDistance |
| chr16 | 95403436 | 95403831 | 396  | 0.99  | 0.00804  | 0.0359   | ENSMUSG0000004073Erg               | protein_codi  | 95359169 | 95586593   | inside       | 182959 | 44627            | shortestDistance |
| chr16 | 95415811 | 95416504 | 694  | 3.14  | 1.95E-14 | 7.12E-12 | ENSMUSG0000004073Erg               | protein_codi  | 95359169 | 95586593   | inside       | 170435 | 56642            | shortestDistance |
| chr16 | 95421382 | 95422342 | 961  | 2.06  | 1.12E-06 | 2.58E-05 | ENSMUSG0000004073Erg               | protein_codi  | 95359169 | 95586593   | inside       | 164731 | 62123            | shortestDistance |
| chr16 | 95438919 | 95439662 | 744  | 0.8   | 0.0111   | 0.046    | ENSMUSG0000004073Erg               | protein_codi  | 95359169 | 95586593   | inside       | 147303 | 79750            | shortestDistance |
| chr16 | 95446412 | 95446743 | 332  | 1.32  | 0.000584 | 0.00467  | ENSMUSG0000004073Erg               | protein_codi  | 95359169 | 95586593   | inside       | 140015 | 87243            | shortestDistance |
| chr16 | 95449298 | 95449706 | 409  | 1.08  | 0.00408  | 0.0213   | ENSMUSG0000004073Erg               | protein_codi  | 95359169 | 95586593   | inside       | 137091 | 90129            | shortestDistance |
| chr16 | 95464470 | 95465039 | 570  | 3.62  | 4.75E-17 | 5.93E-14 | ENSMUSG0000004073Erg               | protein_codi  | 95359169 | 95586593   | inside       | 121839 | 105301           | shortestDistance |
| chr16 | 95570663 | 95570951 | 289  | 1.3   | 0.00977  | 0.0417   | ENSMUSG0000004073Erg               | protein_codi  | 95359169 | 95586593   | inside       | 15786  | 15642            | shortestDistance |
| chr16 | 95611977 | 95612678 | 702  | 1.25  | 0.00161  | 0.0104   | ENSMUSG0000004073Erg               | protein_codi  | 95359169 | 95586593   | upstream     | -25735 | 25384            | shortestDistance |
| chr16 | 95640673 | 95641212 | 540  | 1.77  | 1.17E-06 | 2.68E-05 | ENSMUSG0000004073Erg               | protein_codi  | 95359169 | 95586593   | upstream     | -54349 | 54080            | shortestDistance |
| chr16 | 95658896 | 95659274 | 379  | 1.27  | 0.0023   | 0.0137   | ENSMUSG0000002289Ets2              | protein_codi  | 95702075 | 95721051   | upstream     | -42990 | 42801            | shortestDistance |
| chr16 | 95708193 | 95709003 | 811  | 3.14  | 1.54E-12 | 2.62E-10 | ENSMUSG0000002289Ets2              | protein_codi  | 95702075 | 95721051   | inside       | 6523   | 6118             | shortestDistance |
| chr16 | 95728577 | 95729350 | 774  | 1.49  | 5.08E-06 | 9.33E-05 | ENSMUSG0000002289Ets2              | protein_codi  | 95702075 | 95721051   | downstream   | 26889  | 7526             | shortestDistance |
| chr16 | 95802009 | 95820367 | 359  | 2.26  | 2.05E-06 | 4.31E-05 | ENSMUSG00000086891600002D24lincRNA | 95831123      | 95929077 | downstream | 108889       | 10756  | shortestDistance |                  |
| chr16 | 95827176 | 95827849 | 674  | 0.99  | 0.00291  | 0.0164   | ENSMUSG00000086891600002D24lincRNA | 95831123      | 95929077 | downstream | 101565       | 3274   | shortestDistance |                  |
| chr16 | 95833437 | 95833807 | 371  | 1.45  | 4.75E-05 | 0.00605  | ENSMUSG00000086891600002D24lincRNA | 95831123      | 95929077 | inside     | 95455        | 2314   | shortestDistance |                  |
| chr16 | 95839136 | 95839393 | 258  | 2.33  | 1.29E-06 | 2.90E-05 | ENSMUSG00000086891600002D24lincRNA | 95831123      | 95929077 | inside     | 89813        | 8013   | shortestDistance |                  |
| chr16 | 95839494 | 95840206 | 713  | 1.86  | 6.25E-06 | 0.000111 | ENSMUSG00000086891600002D24lincRNA | 95831123      | 95929077 | inside     | 89227        | 8371   | shortestDistance |                  |
| chr16 | 95839401 | 95839398 | 598  | 2.82  | 3.20E-09 | 1.74E-07 | ENSMUSG00000086891600002D24lincRNA | 95831123      | 95929077 | inside     | 35377        | 35079  | shortestDistance |                  |
| chr16 | 95897880 | 95898197 | 318  | 4.69  | 6.76E-13 | 1.33E-10 | ENSMUSG00000086891600002D24lincRNA | 95831123      | 95929077 | inside     | 31039        | 30880  | shortestDistance |                  |
| chr16 | 95929557 | 95930195 | 639  | 1.31  | 0.00057  | 0.00458  | ENSMUSG00000086891600002D24lincRNA | 95831123      | 95929077 | upstream   | -799         | 480    | shortestDistance |                  |
| chr16 | 95931424 | 95931917 | 494  | 1.02  | 0.00355  | 0.0191   | ENSMUSG00000086891600002D24lincRNA | 95831123      | 95929077 | upstream   | -2593        | 2347   | shortestDistance |                  |
| chr16 | 95945408 | 95945789 | 382  | 1.36  | 0.000976 | 0.007    | ENSMUSG00000086891600002D24lincRNA | 95831123      | 95929077 | upstream   | -16521       | 16331  | shortestDistance |                  |
| chr16 | 95955714 | 95956328 | 615  | 1.69  | 1.90E-05 | 0.000283 | ENSMUSG0000002291Psmg1             | protein_codi  | 95979933 | 95990960   | downstream   | 34939  | 23605            | shortestDistance |
| chr16 | 96081292 | 96081757 | 466  | 0.89  | 0.00446  | 0.0228   | ENSMUSG0000002291Brwd1             | protein_codi  | 95992092 | 96082526   | inside       | 1002   | 769              | shortestDistance |
| chr16 | 96145036 | 96146002 | 967  | 0.79  | 0.0116   | 0.0474   | ENSMUSG0000002314Wrpb              | protein_codi  | 96145407 | 96157852   | overlapStart | 112    | 371              | shortestDistance |
| chr16 | 96291896 | 96292243 | 348  | 1.25  | 0.00417  | 0.0217   | ENSMUSG0000007489B3galt5           | protein_codi  | 96235801 | 96319859   | inside       | 56269  | 27616            | shortestDistance |
| chr16 | 96307642 | 96307922 | 281  | 1.8   | 0.000764 | 0.00577  | ENSMUSG0000007489B3galt5           | protein_codi  | 96235801 | 96319859   | inside       | 71981  | 11937            | shortestDistance |
| chr16 | 96439543 | 96440568 | 1026 | 1.56  | 1.01E-05 | 0.000167 | ENSMUSG0000000011Igtb2l            | protein_codi  | 96422288 | 96443619   | inside       | 3563   | 3051             | shortestDistance |
| chr16 | 96469530 | 96469937 | 408  | 1.07  | 0.0111   | 0.0459   | ENSMUSG0000009022Pcp4              | protein_codi  | 96467606 | 96525793   | inside       | 2128   | 1924             | shortestDistance |
| chr16 | 96533505 | 96534363 | 859  | -0.91 | 0.0102   | 0.043    | ENSMUSG0000009022Pcp4              | protein_codi  | 96467606 | 96525793   | downstream   | 66328  | 7712             | shortestDistance |
| chr16 | 96624506 | 96625368 | 863  | 1.36  | 0.00329  | 0.018    | ENSMUSG0000005027Dscam             | protein_codi  | 96592079 | 97170752   | inside       | 545815 | 32427            | shortestDistance |
| chr16 | 96654084 | 96654488 | 405  | 2.14  | 1.34E-05 | 0.000211 | ENSMUSG0000005027Dscam             | protein_codi  | 96592079 | 97170752   | inside       | 516466 | 62005            | shortestDistance |
| chr16 | 96676734 | 96677196 | 463  | 3.73  | 3.51E-12 | 5.37E-10 | ENSMUSG0000005027Dscam             | protein_codi  | 96592079 | 97170752   | inside       | 493787 | 84655            | shortestDistance |
| chr16 | 97103032 | 97103751 | 720  | 1.34  | 0.000247 | 0.00235  | ENSMUSG0000005027Dscam             | protein_codi  | 96592079 | 97170752   | inside       | 67360  | 67001            | shortestDistance |
| chr16 | 97105104 | 97105839 | 736  | 0.93  | 0.00768  | 0.0347   | ENSMUSG0000005027Dscam             | protein_codi  | 96592079 | 97170752   | inside       | 65280  | 64913            | shortestDistance |
| chr16 | 97110027 | 97110738 | 712  | 2.08  | 8.26E-09 | 3.94E-07 | ENSMUSG0000005027Dscam             | protein_codi  | 96592079 | 97170752   | inside       | 60370  | 60014            | shortestDistance |
| chr16 | 97240109 | 97240739 | 631  | 0.92  | 0.0078   | 0.0351   | ENSMUSG0000005027Dscam             | protein_codi  | 96592079 | 97170752   | upstream     | -69672 | 69357            | shortestDistance |
| chr16 | 97241492 | 97242042 | 551  | 1.4   | 0.000274 | 0.00254  | ENSMUSG0000005027Dscam             | protein_codi  | 96592079 | 97170752   | upstream     | -71015 | 70740            | shortestDistance |
| chr16 | 97270773 | 97271657 | 885  | 1.08  | 0.00167  | 0.0107   | ENSMUSG0000004060Bace2             | protein_codi  | 97356728 | 97439012   | upstream     | -85513 | 85071            | shortestDistance |
| chr16 | 97447462 | 97447678 | 217  | -1.44 | 0.000901 | 0.00656  | ENSMUSG0000000038Mx1               | protein_codi  | 97447035 | 97462907   | inside       | 15337  | 427              | shortestDistance |
| chr16 | 97462781 | 97463821 | 1041 | 1.16  | 0.00185  | 0.0116   | ENSMUSG0000000038Mx1               | protein_codi  | 97447035 | 97462907   | overlapStart | -394   | 126              | shortestDistance |
| chr16 | 97593041 | 97593446 | 406  | 1.21  | 0.000629 | 0.00495  | ENSMUSG0000000038Tmprs2            | protein_codi  | 97564684 | 97611195   | inside       | 17951  | 17749            | shortestDistance |
| chr17 | 3079289  | 3079616  | 328  | -1.1  | 0.000987 | 0.00706  | ENSMUSG0000002379Pisd-ps2          | transcribed_1 | 3076578  | 3084183    | inside       | 4731   | 2711             | shortestDistance |
| chr17 | 3092747  | 3093130  | 384  | 1.66  | 7.78E-05 | 0.000905 | ENSMUSG0000002379Pisd-ps2          | transcribed_1 | 3076578  | 3084183    | upstream     | -8755  | 8564             | shortestDistance |
| chr17 | 3104135  | 3104864  | 730  | 2.38  | 8.18E-10 | 5.50E-08 | ENSMUSG0000004620Scaf8             | protein_codi  | 3114972  | 31198855   | upstream     | -10472 | 10108            | shortestDistance |
| chr17 | 3204830  | 3205507  | 678  | 1.13  | 0.000402 | 0.00348  | ENSMUSG0000004620Scaf8             | protein_codi  | 3114972  | 31198855   | downstream   | 90196  | 5975             | shortestDistance |
| chr17 | 3451065  | 3451414  | 350  | 1     | 0.0033   | 0.0181   | ENSMUSG0000002380Tiam2             | protein_codi  | 3326573  | 3531344    | inside       | 124667 | 79930            | shortestDistance |
| chr17 | 3452995  | 3453337  | 343  | 1.99  | 3.94E-06 | 7.49E-05 | ENSMUSG0000002380Tiam2             | protein_codi  | 3326573  | 3531344    | inside       | 126593 | 78007            | shortestDistance |
| chr17 | 3463915  | 3464536  | 622  | 2.2   | 1.59E-06 | 3.46E-05 | ENSM                               |               |          |            |              |        |                  |                  |

|       |          |          |      |       |          |          |                    |            |              |          |          |              |         |          |                  |
|-------|----------|----------|------|-------|----------|----------|--------------------|------------|--------------|----------|----------|--------------|---------|----------|------------------|
| chr17 | 9002393  | 9002791  | 399  | -1.2  | 0.00137  | 0.00912  | ENSMUSG0000002387  | 170001014R | protein_codi | 8988333  | 9008319  | inside       | 14259   | 5528     | shortestDistance |
| chr17 | 9145697  | 9146474  | 778  | 2.2   | 1.61E-08 | 7.07E-07 | ENSMUSG0000009704  | 6530411M01 | lincRNA      | 9147719  | 9167836  | downstream   | 21750   | 1245     | shortestDistance |
| chr17 | 9529352  | 9529690  | 339  | -1.68 | 7.52E-06 | 0.00013  | ENSMUSG00000010193 | Gm17748    | processed_p  | 9421943  | 9422464  | upstream     | -107057 | 106888   | shortestDistance |
| chr17 | 9557542  | 9558118  | 577  | -1.66 | 5.66E-06 | 0.000102 | ENSMUSG00000004617 | Pabpc6     | protein_codi | 9666497  | 9669704  | downstream   | 111874  | 108379   | shortestDistance |
| chr17 | 9835002  | 9835911  | 410  | -3.32 | 1.05E-09 | 6.75E-08 | ENSMUSG00000004617 | Pabpc6     | protein_codi | 9666497  | 9669704  | upstream     | -166002 | 165798   | shortestDistance |
| chr17 | 10040385 | 10040687 | 303  | -1.4  | 0.00119  | 0.00819  | ENSMUSG00000006207 | Qk         | protein_codi | 10206471 | 10319361 | downstream   | 278825  | 165784   | shortestDistance |
| chr17 | 10301002 | 10301662 | 661  | -0.99 | 0.00565  | 0.0274   | ENSMUSG00000006207 | Qk         | protein_codi | 10206471 | 10319361 | inside       | 18029   | 17699    | shortestDistance |
| chr17 | 10334825 | 10336106 | 1282 | -1.14 | 0.000444 | 0.00376  | ENSMUSG00000009938 | 1700110C19 | lincRNA      | 10324602 | 10329307 | downstream   | 10864   | 5518     | shortestDistance |
| chr17 | 10498006 | 10498271 | 266  | -1.12 | 0.00476  | 0.0239   | ENSMUSG00000008994 | Gm16168    | antisense_RI | 10496446 | 10569396 | inside       | 1692    | 1560     | shortestDistance |
| chr17 | 10606097 | 10606598 | 502  | -1.07 | 0.00379  | 0.0201   | ENSMUSG00000003719 | Pacrg      | protein_codi | 10403012 | 10840311 | inside       | 233963  | 203085   | shortestDistance |
| chr17 | 10724880 | 10725239 | 360  | 1.54  | 0.000674 | 0.00523  | ENSMUSG00000003719 | Pacrg      | protein_codi | 10403012 | 10840311 | inside       | 115251  | 115072   | shortestDistance |
| chr17 | 10757521 | 10757809 | 289  | 3.36  | 4.10E-08 | 1.56E-06 | ENSMUSG00000003719 | Pacrg      | protein_codi | 10403012 | 10840311 | inside       | 82646   | 82502    | shortestDistance |
| chr17 | 10766769 | 10767098 | 330  | 1.75  | 0.000215 | 0.00209  | ENSMUSG00000003719 | Pacrg      | protein_codi | 10403012 | 10840311 | inside       | 73377   | 73213    | shortestDistance |
| chr17 | 10901705 | 10902085 | 381  | -1.46 | 0.000338 | 0.00303  | ENSMUSG00000002382 | ParK2      | protein_codi | 10840384 | 12063361 | inside       | 61511   | 61321    | shortestDistance |
| chr17 | 11067375 | 11068513 | 1139 | -0.91 | 0.00488  | 0.0244   | ENSMUSG00000002382 | ParK2      | protein_codi | 10840384 | 12063361 | inside       | 227560  | 226991   | shortestDistance |
| chr17 | 11476485 | 11476908 | 424  | -1.15 | 0.0079   | 0.0355   | ENSMUSG00000002382 | ParK2      | protein_codi | 10840384 | 12063361 | inside       | 636312  | 586453   | shortestDistance |
| chr17 | 11697109 | 11697422 | 314  | -1.5  | 0.0111   | 0.0458   | ENSMUSG00000002382 | ParK2      | protein_codi | 10840384 | 12063361 | inside       | 856882  | 365939   | shortestDistance |
| chr17 | 11719688 | 11720181 | 494  | -1.4  | 0.00447  | 0.0229   | ENSMUSG00000002382 | ParK2      | protein_codi | 10840384 | 12063361 | inside       | 879550  | 343180   | shortestDistance |
| chr17 | 11724132 | 11724547 | 416  | -0.94 | 0.0097   | 0.0415   | ENSMUSG00000002382 | ParK2      | protein_codi | 10840384 | 12063361 | inside       | 883956  | 338814   | shortestDistance |
| chr17 | 11788321 | 11788870 | 550  | 1.57  | 0.00587  | 0.0282   | ENSMUSG00000002382 | ParK2      | protein_codi | 10840384 | 12063361 | inside       | 948212  | 274491   | shortestDistance |
| chr17 | 11993342 | 11993617 | 276  | -1.02 | 0.00997  | 0.0424   | ENSMUSG00000002382 | ParK2      | protein_codi | 10840384 | 12063361 | inside       | 1153096 | 69744    | shortestDistance |
| chr17 | 12030017 | 12030304 | 288  | -2.52 | 7.54E-08 | 2.61E-06 | ENSMUSG00000002382 | ParK2      | protein_codi | 10840384 | 12063361 | inside       | 1189776 | 33057    | shortestDistance |
| chr17 | 12099468 | 12099705 | 238  | -1.12 | 0.00575  | 0.0277   | ENSMUSG00000002382 | Agpat4     | protein_codi | 12118704 | 12219645 | upstream     | -19118  | 18999    | shortestDistance |
| chr17 | 12159928 | 12160599 | 672  | 2.26  | 9.35E-08 | 3.14E-06 | ENSMUSG00000002382 | Agpat4     | protein_codi | 12118704 | 12219645 | inside       | 41560   | 41224    | shortestDistance |
| chr17 | 12162927 | 12163160 | 234  | -2.42 | 1.07E-07 | 3.54E-06 | ENSMUSG00000002382 | Agpat4     | protein_codi | 12118704 | 12219645 | inside       | 44340   | 44223    | shortestDistance |
| chr17 | 12205556 | 12206229 | 674  | -1.38 | 0.000671 | 0.00521  | ENSMUSG00000002382 | Agpat4     | protein_codi | 12118704 | 12219645 | inside       | 87188   | 13416    | shortestDistance |
| chr17 | 12327801 | 12328387 | 587  | -1.84 | 1.98E-05 | 0.000293 | ENSMUSG00000009735 | 4732491K20 | lincRNA      | 12318885 | 12327250 | downstream   | 9209    | 551      | shortestDistance |
| chr17 | 12377787 | 12378526 | 740  | 2.42  | 4.69E-09 | 2.41E-07 | ENSMUSG00000005948 | Pig        | protein_codi | 12378609 | 12419384 | upstream     | -453    | 83       | shortestDistance |
| chr17 | 12499352 | 12499831 | 480  | 2.76  | 2.30E-10 | 1.86E-08 | ENSMUSG00000002382 | Slc22a3    | protein_codi | 12419972 | 12507704 | inside       | 8112    | 7873     | shortestDistance |
| chr17 | 12518203 | 12518653 | 451  | 0.93  | 0.00815  | 0.0364   | ENSMUSG00000002382 | Slc22a3    | protein_codi | 12419972 | 12507704 | upstream     | -10724  | 10499    | shortestDistance |
| chr17 | 12688682 | 12689259 | 578  | -1.79 | 8.12E-05 | 0.000937 | ENSMUSG00000002383 | Iglt2r     | protein_codi | 12682406 | 12769664 | inside       | 80694   | 6276     | shortestDistance |
| chr17 | 12725383 | 12725915 | 533  | -1.36 | 4.65E-05 | 0.000594 | ENSMUSG00000002383 | Iglt2r     | protein_codi | 12682406 | 12769664 | inside       | 44015   | 42977    | shortestDistance |
| chr17 | 12741147 | 12741449 | 303  | -1.05 | 0.00413  | 0.0215   | ENSMUSG00000007824 | Airm       | antisense_RI | 12741311 | 12860122 | overlapStart | -13     | 138      | shortestDistance |
| chr17 | 12758009 | 12758309 | 301  | 1.6   | 0.000402 | 0.00348  | ENSMUSG00000002383 | Iglt2r     | protein_codi | 12682406 | 12769664 | inside       | 11505   | 11355    | shortestDistance |
| chr17 | 12793735 | 12794453 | 719  | 0.97  | 0.00899  | 0.0391   | ENSMUSG00000007824 | Airm       | antisense_RI | 12741311 | 12860122 | inside       | 52783   | 52424    | shortestDistance |
| chr17 | 12843850 | 12844169 | 320  | -1.34 | 0.00272  | 0.0156   | ENSMUSG00000006803 | Mas1       | protein_codi | 12841079 | 12868143 | inside       | 24133   | 2771     | shortestDistance |
| chr17 | 12940228 | 12940574 | 347  | -1.22 | 0.00604  | 0.0288   | ENSMUSG00000006248 | Aca13      | protein_codi | 12923833 | 12940402 | overlapStart | 1       | 172      | shortestDistance |
| chr17 | 13214165 | 13214644 | 480  | 1.43  | 0.000382 | 0.00334  | ENSMUSG00000007345 | Smok2a     | protein_codi | 13221188 | 13227658 | upstream     | -6784   | 6544     | shortestDistance |
| chr17 | 13479643 | 13480091 | 449  | -1.08 | 0.00119  | 0.00816  | ENSMUSG00000002384 | Tcte2      | protein_codi | 13482553 | 13761825 | downstream   | 281958  | 2462     | shortestDistance |
| chr17 | 13488626 | 13488943 | 318  | -1.37 | 0.000958 | 0.0069   | ENSMUSG00000003834 | Tcte2      | protein_codi | 13482553 | 13761825 | inside       | 273041  | 6073     | shortestDistance |
| chr17 | 13492768 | 13493011 | 334  | -1.07 | 0.00658  | 0.0308   | ENSMUSG00000003834 | Tcte2      | protein_codi | 13482553 | 13761825 | inside       | 268981  | 10125    | shortestDistance |
| chr17 | 13542261 | 13542612 | 352  | -1.35 | 0.000112 | 0.00122  | ENSMUSG00000003834 | Tcte2      | protein_codi | 13482553 | 13761825 | inside       | 219389  | 59708    | shortestDistance |
| chr17 | 13685603 | 13686017 | 415  | 1.44  | 4.11E-05 | 0.000538 | ENSMUSG00000003834 | Tcte2      | protein_codi | 13482553 | 13761825 | inside       | 76015   | 75808    | shortestDistance |
| chr17 | 13731759 | 13732206 | 448  | -0.89 | 0.00879  | 0.0385   | ENSMUSG00000003834 | Tcte2      | protein_codi | 13482553 | 13761825 | inside       | 29843   | 29619    | shortestDistance |
| chr17 | 13744413 | 13745202 | 290  | -1.52 | 0.000391 | 0.0034   | ENSMUSG00000003834 | Tcte2      | protein_codi | 13482553 | 13761825 | inside       | 16767   | 16623    | shortestDistance |
| chr17 | 13866784 | 13867865 | 1082 | 2.76  | 1.04E-10 | 9.55E-09 | ENSMUSG00000006803 | Afdn       | protein_codi | 13760539 | 13906150 | inside       | 106785  | 38285    | shortestDistance |
| chr17 | 14167053 | 14167313 | 261  | -1.9  | 2.96E-05 | 0.000409 | ENSMUSG00000004882 | Dac12      | protein_codi | 14195231 | 14203831 | downstream   | 36648   | 27918    | shortestDistance |
| chr17 | 14172485 | 14173133 | 649  | -1.89 | 3.38E-07 | 9.41E-06 | ENSMUSG00000004882 | Dac12      | protein_codi | 14195231 | 14203831 | downstream   | 31022   | 22098    | shortestDistance |
| chr17 | 14220861 | 14221152 | 292  | -1.17 | 0.00699  | 0.0323   | ENSMUSG00000004882 | Dac12      | protein_codi | 14195231 | 14203831 | upstream     | -17175  | 17030    | shortestDistance |
| chr17 | 14524487 | 14524755 | 269  | -0.97 | 0.0101   | 0.0428   | ENSMUSG00000002388 | Smoc2      | protein_codi | 14279506 | 14404790 | downstream   | 245115  | 119697   | shortestDistance |
| chr17 | 14626835 | 14627267 | 433  | -1.23 | 0.0117   | 0.0478   | ENSMUSG00000002388 | Thbs2      | protein_codi | 14665500 | 14694262 | downstream   | 67211   | 38233    | shortestDistance |
| chr17 | 14856560 | 14856778 | 219  | -1.1  | 0.00883  | 0.0386   | ENSMUSG00000004699 | Wdr27      | protein_codi | 14818672 | 14943158 | inside       | 86489   | 37888    | shortestDistance |
| chr17 | 14860221 | 14860527 | 307  | -1.9  | 2.24E-05 | 0.000325 | ENSMUSG00000004699 | Wdr27      | protein_codi | 14818672 | 14943158 | inside       | 82784   | 41549    | shortestDistance |
| chr17 | 14895140 | 14895355 | 216  | -1.44 | 0.00313  | 0.0173   | ENSMUSG00000004699 | Wdr27      | protein_codi | 14818672 | 14943158 | inside       | 47910   | 47803    | shortestDistance |
| chr17 | 15192588 | 15193272 | 685  | -1.62 | 3.31E-05 | 0.00045  | ENSMUSG00000009762 | Gm5091     | lincRNA      | 15231585 | 15240783 | downstream   | 47853   | 38313    | shortestDistance |
| chr17 | 15269077 | 15269640 | 564  | -1.91 | 5.01E-08 | 1.85E-06 | ENSMUSG00000009762 | Gm5091     | lincRNA      | 15231585 | 15240783 | upstream     | -28575  | 28294    | shortestDistance |
| chr17 | 15269779 | 15270262 | 484  | -0.94 | 0.0113   | 0.0466   | ENSMUSG00000009762 | Gm5091     | lincRNA      | 15231585 | 15240783 | upstream     | -29237  | 28996    | shortestDistance |
| chr17 | 15299821 | 15300201 | 381  | -1.41 | 0.000507 | 0.00417  | ENSMUSG00000009762 | Gm5091     | lincRNA      | 15231585 | 15240783 | upstream     | -59228  | 59038    | shortestDistance |
| chr17 | 15583050 | 15583421 | 372  | 1.86  | 1.78E-05 | 0.000268 | ENSMUSG00000009592 | Gm6686     | processed_p  | 15566164 | 15566421 | upstream     | -16815  | 16629    | shortestDistance |
| chr17 | 15621094 | 15621381 | 288  | 1.67  | 0.000454 | 0.00383  | ENSMUSG00000009592 | Gm6686     | processed_p  | 15566164 | 15566421 | upstream     | -54817  | 54673    | shortestDistance |
| chr17 | 15677875 | 15678672 | 798  | 1.1   | 0.00132  | 0.00889  | ENSMUSG00000002385 | Chd1       | protein_codi | 15704967 | 17394898 | upstream     | -26693  | 26295    | shortestDistance |
| chr17 | 15706027 | 15706353 | 327  | -0.83 | 0.00683  | 0.0317   | ENSMUSG00000002385 | Chd1       | protein_codi | 15704967 | 17394898 | inside       | 1223    | 1060     | shortestDistance |
| chr17 | 15774620 | 15775223 | 604  | 1.87  | 1.24E-06 | 2.82E-05 | ENSMUSG00000002385 | Chd1       | protein_codi | 15704967 | 17394898 | inside       | 69955   | 69653    | shortestDistance |
| chr17 | 15804488 | 15804806 | 319  | -0.97 | 0.00477  | 0.024    | ENSMUSG00000002385 | Chd1       | protein_codi | 15704967 | 17394898 | inside       | 99680   | 99521    | shortestDistance |
| chr17 | 15825555 | 15826852 | 1298 | -1    | 0.00328  | 0.018    | ENSMUSG00000004802 | Rgmb       | protein_codi | 15806253 | 15826586 | overlapStart | 382     | 266      | shortestDistance |
| chr17 | 15830606 | 15831261 | 656  | -1.42 | 0.000114 | 0.00124  | ENSMUSG00000002385 | Chd1       | protein_codi | 15704967 | 17394898 | inside       | 125967  | 125639   | shortestDistance |
| chr17 | 16950992 | 16951879 | 888  | -0.87 | 0.00247  | 0.0145   | ENSMUSG00000006014 | BC002059   | lincRNA      | 16951539 | 16974157 | overlapStart | -103    | 340      | shortestDistance |
| chr17 | 17004543 | 17005675 | 1133 | -0.73 | 0.0111   | 0.046    | ENSMUSG00000002385 | Chd1       | protein_codi | 15704967 | 17394898 | inside       | 1300142 | 389223   | shortestDistance |
| chr17 | 17063594 | 17064504 | 911  | -1.03 | 0.00219  | 0.0132   | ENSMUSG00000009669 | Zfp960     | protein_codi | 17064113 | 17089628 | overlapStart | -64     | 391      | shortestDistance |
| chr17 | 17234268 | 17235417 | 1150 | -0.72 | 0.0112   | 0.0461   | ENSMUSG00000002385 | Chd1       | protein_codi | 15704967 | 17394898 | inside       | 1529875 | 159481</ |                  |







|       |          |          |      |       |          |          |                            |              |           |          |              |         |        |                  |
|-------|----------|----------|------|-------|----------|----------|----------------------------|--------------|-----------|----------|--------------|---------|--------|------------------|
| chr17 | 65540601 | 65541355 | 755  | -1.39 | 0.00011  | 0.00121  | ENSMUSG0000004503Tmem232   | protein_codi | 65256005  | 65540782 | overlapStart | -196    | 181    | shortestDistance |
| chr17 | 65504929 | 65605302 | 374  | 0.96  | 0.00816  | 0.0364   | ENSMUSG0000002409Vapa      | protein_codi | 65580056  | 65613555 | inside       | 8439    | 8253   | shortestDistance |
| chr17 | 65608790 | 65609148 | 359  | 2.11  | 6.56E-09 | 3.24E-07 | ENSMUSG0000002409Vapa      | protein_codi | 65580056  | 65613555 | inside       | 4586    | 4407   | shortestDistance |
| chr17 | 65629960 | 65630504 | 545  | 1.86  | 9.25E-06 | 0.000155 | ENSMUSG0000005061Txndc2    | protein_codi | 65637505  | 65642204 | downstream   | 11972   | 7001   | shortestDistance |
| chr17 | 65641752 | 65642256 | 505  | 1.98  | 1.33E-06 | 2.97E-05 | ENSMUSG0000005061Txndc2    | protein_codi | 65637505  | 65642204 | overlapStart | 200     | 52     | shortestDistance |
| chr17 | 65717673 | 65717968 | 296  | -1.6  | 0.000701 | 0.00539  | ENSMUSG0000005651Rab31     | protein_codi | 65651726  | 65772752 | inside       | 54932   | 54784  | shortestDistance |
| chr17 | 65718614 | 65718991 | 378  | 2.64  | 4.52E-09 | 2.33E-07 | ENSMUSG0000005651Rab31     | protein_codi | 65651726  | 65772752 | inside       | 53950   | 53761  | shortestDistance |
| chr17 | 65930968 | 65931389 | 422  | 1.63  | 8.05E-05 | 0.000931 | ENSMUSG0000002409Twsig1    | protein_codi | 65923066  | 65951187 | inside       | 20009   | 7902   | shortestDistance |
| chr17 | 66059406 | 66059817 | 412  | 2.22  | 1.25E-05 | 0.000199 | ENSMUSG0000003464Ankrd12   | protein_codi | 65967501  | 66077089 | inside       | 17477   | 17272  | shortestDistance |
| chr17 | 66061271 | 66061537 | 267  | -1.14 | 0.0097   | 0.0415   | ENSMUSG0000003464Ankrd12   | protein_codi | 65967501  | 66077089 | inside       | 15685   | 15552  | shortestDistance |
| chr17 | 66416976 | 66417353 | 378  | -1.79 | 2.06E-06 | 4.32E-05 | ENSMUSG0000005210Mtdc1     | protein_codi | 66336982  | 66449750 | inside       | 32586   | 32397  | shortestDistance |
| chr17 | 66448395 | 66450398 | 2004 | -0.87 | 0.0035   | 0.0189   | ENSMUSG0000005210Mtdc1     | protein_codi | 66336982  | 66449750 | overlapStart | 354     | 648    | shortestDistance |
| chr17 | 66451185 | 66451471 | 287  | -0.83 | 0.00984  | 0.042    | ENSMUSG0000005210Mtdc1     | protein_codi | 66336982  | 66449750 | upstream     | -1578   | 1435   | shortestDistance |
| chr17 | 66594520 | 66594829 | 310  | -1.8  | 7.68E-06 | 0.000132 | ENSMUSG0000002410Themis3   | protein_codi | 66552525  | 66594621 | overlapStart | -53     | 101    | shortestDistance |
| chr17 | 66701301 | 66702187 | 887  | -1.02 | 0.00398  | 0.0209   | ENSMUSG0000003327Ptpm      | protein_codi | 66666947  | 67354457 | inside       | 652713  | 34354  | shortestDistance |
| chr17 | 66846983 | 66847454 | 472  | 3.17  | 2.10E-13 | 5.07E-11 | ENSMUSG0000003327Ptpm      | protein_codi | 66666947  | 67354457 | inside       | 507239  | 180036 | shortestDistance |
| chr17 | 67084121 | 67084464 | 344  | 1.15  | 0.0107   | 0.0446   | ENSMUSG0000003327Ptpm      | protein_codi | 66666947  | 67354457 | inside       | 270165  | 269993 | shortestDistance |
| chr17 | 67111262 | 67113358 | 687  | -0.98 | 0.00423  | 0.0219   | ENSMUSG0000003327Ptpm      | protein_codi | 66666947  | 67354457 | inside       | 241442  | 241099 | shortestDistance |
| chr17 | 67125607 | 67126031 | 425  | -1.11 | 0.00459  | 0.0233   | ENSMUSG0000003327Ptpm      | protein_codi | 66666947  | 67354457 | inside       | 228638  | 228426 | shortestDistance |
| chr17 | 67133406 | 67134112 | 707  | -1.12 | 0.000469 | 0.00393  | ENSMUSG0000003327Ptpm      | protein_codi | 66666947  | 67354457 | inside       | 220698  | 220345 | shortestDistance |
| chr17 | 67175790 | 67176155 | 366  | -0.87 | 0.00998  | 0.0424   | ENSMUSG0000003327Ptpm      | protein_codi | 66666947  | 67354457 | inside       | 178485  | 178302 | shortestDistance |
| chr17 | 67188472 | 67188954 | 483  | -1.39 | 0.00134  | 0.00142  | ENSMUSG0000003327Ptpm      | protein_codi | 66666947  | 67354457 | inside       | 165744  | 165503 | shortestDistance |
| chr17 | 67294141 | 67294563 | 423  | -1.59 | 5.32E-05 | 0.000665 | ENSMUSG0000003327Ptpm      | protein_codi | 66666947  | 67354457 | inside       | 60105   | 59894  | shortestDistance |
| chr17 | 67329186 | 67329973 | 788  | 0.8   | 0.0122   | 0.0493   | ENSMUSG0000003327Ptpm      | protein_codi | 66666947  | 67354457 | inside       | 24877   | 24484  | shortestDistance |
| chr17 | 67339586 | 67339926 | 341  | 1.68  | 9.42E-05 | 0.00106  | ENSMUSG0000003327Ptpm      | protein_codi | 66666947  | 67354457 | inside       | 14701   | 14531  | shortestDistance |
| chr17 | 67359164 | 67359907 | 294  | 2.33  | 1.92E-06 | 4.07E-05 | ENSMUSG0000003327Ptpm      | protein_codi | 66666947  | 67354457 | upstream     | -5303   | 5157   | shortestDistance |
| chr17 | 67512526 | 67513403 | 878  | -0.88 | 0.00948  | 0.0408   | ENSMUSG000000782Gm22277    | misc_RNA     | 67551607  | 67551883 | upstream     | -38643  | 38204  | shortestDistance |
| chr17 | 67583465 | 67583795 | 331  | -0.98 | 0.00802  | 0.0359   | ENSMUSG000000782Gm22277    | misc_RNA     | 67551607  | 67551883 | downstream   | 32023   | 31582  | shortestDistance |
| chr17 | 67585030 | 67585686 | 657  | -1.19 | 0.000699 | 0.00638  | ENSMUSG000000782Gm22277    | misc_RNA     | 67551607  | 67551883 | downstream   | 33751   | 33147  | shortestDistance |
| chr17 | 67603079 | 67603423 | 345  | -3.48 | 1.74E-10 | 1.47E-08 | ENSMUSG0000007337Lrrc30    | protein_codi | 676330965 | 67632723 | downstream   | 29472   | 27542  | shortestDistance |
| chr17 | 67625457 | 67625823 | 367  | -1.84 | 4.44E-05 | 0.000572 | ENSMUSG0000007337Lrrc30    | protein_codi | 676330965 | 67632723 | downstream   | 7083    | 5142   | shortestDistance |
| chr17 | 67651538 | 67651880 | 343  | -0.93 | 0.0104   | 0.0436   | ENSMUSG0000007337Lrrc30    | protein_codi | 676330965 | 67632723 | upstream     | -18986  | 18815  | shortestDistance |
| chr17 | 67779819 | 67780155 | 337  | -0.97 | 0.00537  | 0.0263   | ENSMUSG0000003729Lama1     | protein_codi | 67697265  | 67822645 | inside       | 82722   | 42490  | shortestDistance |
| chr17 | 67950494 | 67951556 | 1063 | -1.59 | 3.81E-05 | 0.000505 | ENSMUSG0000002404Arhgap28  | protein_codi | 67842713  | 68004120 | inside       | 53095   | 52564  | shortestDistance |
| chr17 | 67978792 | 67979217 | 426  | -1.59 | 0.000503 | 0.00414  | ENSMUSG0000002404Arhgap28  | protein_codi | 67842713  | 68004120 | inside       | 25116   | 24903  | shortestDistance |
| chr17 | 67988729 | 67989948 | 1220 | -1.3  | 0.000557 | 0.0045   | ENSMUSG0000002404Arhgap28  | protein_codi | 67842713  | 68004120 | inside       | 14782   | 14172  | shortestDistance |
| chr17 | 68029488 | 68029903 | 416  | 1.87  | 5.48E-06 | 9.94E-05 | ENSMUSG0000002404Arhgap28  | protein_codi | 67842713  | 68004120 | upstream     | -25576  | 25368  | shortestDistance |
| chr17 | 68057191 | 68057786 | 596  | 1.91  | 0.000166 | 0.0017   | ENSMUSG0000002404Arhgap28  | protein_codi | 67842713  | 68004120 | upstream     | -53368  | 53071  | shortestDistance |
| chr17 | 68087097 | 68087710 | 614  | -1.25 | 5.21E-05 | 0.000654 | ENSMUSG0000002404Arhgap28  | protein_codi | 67842713  | 68004120 | upstream     | -83284  | 82977  | shortestDistance |
| chr17 | 68149259 | 68149857 | 599  | 2.96  | 2.53E-10 | 2.01E-08 | ENSMUSG0000004156L3mbt14   | protein_codi | 68273797  | 68777961 | upstream     | -124239 | 123940 | shortestDistance |
| chr17 | 68161107 | 68161564 | 458  | -2.23 | 2.53E-07 | 7.36E-06 | ENSMUSG0000004156L3mbt14   | protein_codi | 68273797  | 68777961 | upstream     | -112461 | 112233 | shortestDistance |
| chr17 | 68210407 | 68211174 | 768  | -2.01 | 8.40E-07 | 2.03E-05 | ENSMUSG0000004156L3mbt14   | protein_codi | 68273797  | 68777961 | upstream     | -63007  | 62623  | shortestDistance |
| chr17 | 68275149 | 68275713 | 565  | 1.44  | 6.27E-05 | 0.000763 | ENSMUSG0000004156L3mbt14   | protein_codi | 68273797  | 68777961 | inside       | 1634    | 1352   | shortestDistance |
| chr17 | 68837008 | 68837329 | 322  | -1.04 | 0.00425  | 0.022    | ENSMUSG0000009540Tmem200c  | protein_codi | 68837136  | 68843138 | overlapStart | 32      | 128    | shortestDistance |
| chr17 | 68840964 | 68842026 | 1063 | -1.3  | 3.40E-05 | 0.00046  | ENSMUSG0000009540Tmem200c  | protein_codi | 68837136  | 68843138 | inside       | 4359    | 1112   | shortestDistance |
| chr17 | 69120554 | 69121411 | 858  | -1.34 | 0.000321 | 0.00289  | ENSMUSG0000002404Epb413    | protein_codi | 69075683  | 69289989 | inside       | 45299   | 44871  | shortestDistance |
| chr17 | 69156461 | 69157812 | 1352 | -0.85 | 0.00552  | 0.0269   | ENSMUSG0000002404Epb413    | protein_codi | 69075683  | 69289989 | inside       | 81453   | 80778  | shortestDistance |
| chr17 | 69348541 | 69349622 | 1082 | -1.15 | 0.000136 | 0.00144  | ENSMUSG0000004967Zbtb14    | protein_codi | 69383050  | 69390750 | upstream     | -33968  | 33428  | shortestDistance |
| chr17 | 69365056 | 69365388 | 333  | 1.49  | 0.000276 | 0.00257  | ENSMUSG0000004967Zbtb14    | protein_codi | 69383050  | 69390750 | upstream     | -17828  | 17662  | shortestDistance |
| chr17 | 69461745 | 69462230 | 486  | 2.33  | 2.41E-06 | 4.94E-05 | ENSMUSG00000009163Akin1    | protein_codi | 69439326  | 69489233 | inside       | 22662   | 22419  | shortestDistance |
| chr17 | 69475326 | 69475912 | 587  | -1.17 | 0.000184 | 0.00185  | ENSMUSG00000009163Akin1    | protein_codi | 69439326  | 69489233 | inside       | 36293   | 33321  | shortestDistance |
| chr17 | 70427885 | 70428198 | 314  | -1.29 | 0.00228  | 0.0136   | ENSMUSG0000000327Dlga1p    | protein_codi | 69969073  | 70821413 | inside       | 458969  | 393215 | shortestDistance |
| chr17 | 70488725 | 70489477 | 753  | -1.03 | 0.00275  | 0.0157   | ENSMUSG0000000327Dlga1p    | protein_codi | 69969073  | 70821413 | inside       | 520028  | 331936 | shortestDistance |
| chr17 | 70501753 | 70502445 | 693  | -0.81 | 0.012    | 0.0488   | ENSMUSG0000000327Dlga1p    | protein_codi | 69969073  | 70821413 | inside       | 533026  | 318968 | shortestDistance |
| chr17 | 70511443 | 70511753 | 311  | 2.01  | 8.67E-05 | 0.000988 | ENSMUSG0000000327Dlga1p    | protein_codi | 69969073  | 70821413 | inside       | 542525  | 309660 | shortestDistance |
| chr17 | 70526041 | 70526547 | 507  | -0.98 | 0.009    | 0.0392   | ENSMUSG0000000327Dlga1p    | protein_codi | 69969073  | 70821413 | inside       | 557221  | 294866 | shortestDistance |
| chr17 | 70534171 | 70534898 | 728  | 2.46  | 3.23E-09 | 1.75E-07 | ENSMUSG0000000327Dlga1p    | protein_codi | 69969073  | 70821413 | inside       | 565461  | 286515 | shortestDistance |
| chr17 | 70570705 | 70571449 | 745  | 1.45  | 3.97E-05 | 0.000523 | ENSMUSG0000000327Dlga1p    | protein_codi | 69969073  | 70821413 | inside       | 602004  | 249964 | shortestDistance |
| chr17 | 70851674 | 70852055 | 382  | 1.02  | 0.00236  | 0.014    | ENSMUSG00000004740Tgfr1    | protein_codi | 70844205  | 70853546 | inside       | 1682    | 1491   | shortestDistance |
| chr17 | 70963567 | 70963995 | 429  | 1     | 0.00648  | 0.0305   | ENSMUSG00000009762Gm26561  | lincRNA      | 70878078  | 71393284 | inside       | 85703   | 85489  | shortestDistance |
| chr17 | 70985502 | 70985917 | 416  | 3.11  | 2.50E-11 | 2.87E-09 | ENSMUSG00000003486Myl12b   | protein_codi | 70973920  | 70998077 | inside       | 5077    | 4870   | shortestDistance |
| chr17 | 71004292 | 71004651 | 360  | 2.33  | 3.63E-09 | 1.93E-07 | ENSMUSG00000009762Gm26561  | lincRNA      | 70878078  | 71393284 | inside       | 126394  | 126214 | shortestDistance |
| chr17 | 71086944 | 71087381 | 438  | 1.48  | 0.00055  | 0.00445  | ENSMUSG0000002404Mym1      | protein_codi | 71019521  | 71126856 | inside       | 67641   | 39475  | shortestDistance |
| chr17 | 71093857 | 71094262 | 406  | 4.12  | 2.65E-13 | 6.21E-11 | ENSMUSG0000002404Mym1      | protein_codi | 71019521  | 71126856 | inside       | 74539   | 32594  | shortestDistance |
| chr17 | 71111722 | 71118545 | 824  | 0.88  | 0.00748  | 0.034    | ENSMUSG0000002404Mym1      | protein_codi | 71019521  | 71126856 | inside       | 98613   | 8311   | shortestDistance |
| chr17 | 71164893 | 71165407 | 515  | 1.75  | 3.58E-06 | 6.91E-05 | ENSMUSG00000009762Gm26561  | lincRNA      | 70878078  | 71393284 | inside       | 280772  | 227877 | shortestDistance |
| chr17 | 71192047 | 71192345 | 299  | 1.38  | 0.00135  | 0.00906  | ENSMUSG0000002405Lpin2     | protein_codi | 71182560  | 71249817 | inside       | 9636    | 9487   | shortestDistance |
| chr17 | 71223769 | 71224049 | 281  | 1.17  | 0.00728  | 0.0333   | ENSMUSG0000002405Lpin2     | protein_codi | 71182560  | 71249817 | inside       | 41349   | 25768  | shortestDistance |
| chr17 | 71256819 | 71257541 | 723  | 1.01  | 0.00255  | 0.0148   | ENSMUSG0000002405Emilin2   | protein_codi | 71252176  | 71310965 | inside       | 53785   | 4643   | shortestDistance |
| chr17 | 71299847 | 71300699 | 853  | 2.08  | 3.18E-07 | 8.91E-06 | ENSMUSG0000002405Emilin2   | protein_codi | 71252176  | 71310965 | inside       | 10692   | 10266  | shortestDistance |
| chr17 | 71337548 | 71337937 | 390  | 1.74  | 3.28E-05 | 0.000447 | ENSMUSG00000009762Gm26561  | lincRNA      | 70878078  | 71393284 | inside       | 459664  | 55347  | shortestDistance |
| chr17 | 71758227 | 71758493 | 267  | -1.69 | 0.000196 | 0.00194  | ENSMUSG00000004437BC027072 | protein_codi | 71743557  | 717528   |              |         |        |                  |





|       |          |          |      |       |          |          |                              |              |          |          |              |         |        |                  |
|-------|----------|----------|------|-------|----------|----------|------------------------------|--------------|----------|----------|--------------|---------|--------|------------------|
| chr18 | 7692846  | 7693518  | 673  | -0.94 | 0.00258  | 0.0149   | ENSMUSG0000005744Mpp7        | protein_codi | 7347962  | 7626863  | upstream     | -66319  | 65983  | shortestDistance |
| chr18 | 7707907  | 7708430  | 524  | -1.7  | 0.000293 | 0.00269  | ENSMUSG0000005744Mpp7        | protein_codi | 7347962  | 7626863  | upstream     | -81305  | 81044  | shortestDistance |
| chr18 | 7756477  | 7757292  | 816  | -1.1  | 0.000534 | 0.00434  | ENSMUSG00000006482Gm24292    | snRNA        | 7835177  | 7835283  | upstream     | -78293  | 77885  | shortestDistance |
| chr18 | 8693426  | 8694593  | 1168 | -1.98 | 8.33E-06 | 0.000142 | ENSMUSG00000009209Gm5819     | protein_codi | 8694077  | 8694541  | includeFeatu | -67     | 52     | shortestDistance |
| chr18 | 8872207  | 8872798  | 592  | -1.82 | 1.66E-05 | 0.000252 | ENSMUSG0000010317Gm37148     | TEC          | 8928235  | 8929826  | upstream     | -55733  | 55437  | shortestDistance |
| chr18 | 9190642  | 9190996  | 355  | -2.65 | 7.30E-08 | 2.55E-06 | ENSMUSG0000003690Fzd8        | protein_codi | 9212856  | 9216201  | upstream     | -22037  | 21860  | shortestDistance |
| chr18 | 9211765  | 9213731  | 1967 | -1.23 | 0.000643 | 0.00504  | ENSMUSG0000003690Fzd8        | protein_codi | 9212856  | 9216201  | overlapStart | -108    | 875    | shortestDistance |
| chr18 | 9213848  | 9214327  | 480  | -1.37 | 0.00011  | 0.00121  | ENSMUSG0000003690Fzd8        | protein_codi | 9212856  | 9216201  | inside       | 1232    | 992    | shortestDistance |
| chr18 | 9273641  | 9274083  | 443  | -1.15 | 0.0106   | 0.0443   | ENSMUSG0000003685Gjd4        | protein_codi | 9278607  | 9282809  | downstream   | 8947    | 4524   | shortestDistance |
| chr18 | 9274695  | 9275103  | 409  | -1.26 | 0.00458  | 0.0233   | ENSMUSG0000003685Gjd4        | protein_codi | 9278607  | 9282809  | downstream   | 7910    | 3504   | shortestDistance |
| chr18 | 9399311  | 9399801  | 491  | -1.43 | 0.000572 | 0.0046   | ENSMUSG0000002428Ccnv        | protein_codi | 9314044  | 9450150  | inside       | 50594   | 50349  | shortestDistance |
| chr18 | 9855027  | 9855361  | 335  | -1.41 | 0.000694 | 0.00535  | ENSMUSG0000003610Colec12     | protein_codi | 9707648  | 9877995  | inside       | 147546  | 22634  | shortestDistance |
| chr18 | 10051738 | 10053030 | 1293 | -1.04 | 0.000753 | 0.0057   | ENSMUSG0000004787Usp14       | protein_codi | 9995432  | 10045119 | upstream     | -7265   | 6619   | shortestDistance |
| chr18 | 10324975 | 10325776 | 802  | -1.09 | 0.00151  | 0.00988  | ENSMUSG0000004294Greb1l      | protein_codi | 10325177 | 10562934 | overlapStart | 199     | 202    | shortestDistance |
| chr18 | 10646371 | 10647053 | 683  | 1.96  | 4.62E-05 | 0.000592 | ENSMUSG0000000247Abhd3       | protein_codi | 10644411 | 10706771 | inside       | 60059   | 1960   | shortestDistance |
| chr18 | 10706016 | 10707322 | 1307 | -0.87 | 0.00984  | 0.042    | ENSMUSG0000000247Abhd3       | protein_codi | 10644411 | 10706771 | overlapStart | 102     | 551    | shortestDistance |
| chr18 | 10839238 | 10840198 | 961  | -1.64 | 0.000222 | 0.00215  | ENSMUSG0000002429Mib1        | protein_codi | 10725548 | 10818704 | downstream   | 114170  | 20534  | shortestDistance |
| chr18 | 10869414 | 10869779 | 366  | -1.23 | 0.000545 | 0.00441  | ENSMUSG0000002429Mib1        | protein_codi | 10725548 | 10818704 | downstream   | 144048  | 50710  | shortestDistance |
| chr18 | 10885809 | 10886139 | 331  | -1.01 | 0.00375  | 0.0199   | ENSMUSG0000002429Mib1        | protein_codi | 10725548 | 10818704 | downstream   | 160426  | 67105  | shortestDistance |
| chr18 | 10912007 | 10912628 | 622  | -0.97 | 0.00288  | 0.0163   | ENSMUSG0000002429Mib1        | protein_codi | 10725548 | 10818704 | downstream   | 186770  | 93303  | shortestDistance |
| chr18 | 10913510 | 10913892 | 383  | -1.25 | 0.00118  | 0.00811  | ENSMUSG0000002429Mib1        | protein_codi | 10725548 | 10818704 | downstream   | 188153  | 94806  | shortestDistance |
| chr18 | 10941699 | 10942413 | 715  | -1.28 | 0.000139 | 0.00147  | ENSMUSG000000097221010001N08 | lincRNA      | 11049087 | 11052567 | downstream   | 110511  | 106674 | shortestDistance |
| chr18 | 11052258 | 11052795 | 538  | -1.02 | 0.00212  | 0.0129   | ENSMUSG000000097221010001N08 | lincRNA      | 11049087 | 11052567 | overlapStart | 41      | 228    | shortestDistance |
| chr18 | 11111254 | 11111776 | 523  | -1.39 | 0.00106  | 0.00745  | ENSMUSG0000000583Gata6       | protein_codi | 11052510 | 11085635 | downstream   | 59005   | 25619  | shortestDistance |
| chr18 | 11120251 | 11120628 | 378  | -1.17 | 0.000573 | 0.0046   | ENSMUSG0000000583Gata6       | protein_codi | 11052510 | 11085635 | downstream   | 67930   | 34616  | shortestDistance |
| chr18 | 11195036 | 11195460 | 425  | 2.14  | 3.72E-06 | 7.15E-05 | ENSMUSG0000000583Gata6       | protein_codi | 11052510 | 11085635 | downstream   | 142738  | 109401 | shortestDistance |
| chr18 | 11243462 | 11244116 | 655  | -1.09 | 0.00268  | 0.0154   | ENSMUSG0000000583Gata6       | protein_codi | 11052510 | 11085635 | downstream   | 191279  | 157827 | shortestDistance |
| chr18 | 11352080 | 11352893 | 814  | -1.07 | 0.00169  | 0.0108   | ENSMUSG0000000583Gata6       | protein_codi | 11052510 | 11085635 | downstream   | 299976  | 266445 | shortestDistance |
| chr18 | 11466327 | 11466621 | 295  | -1.46 | 0.000853 | 0.00629  | ENSMUSG0000004123Rbbp8       | protein_codi | 11633276 | 11743207 | upstream     | -166802 | 166655 | shortestDistance |
| chr18 | 11534788 | 11535076 | 289  | -1.45 | 0.000585 | 0.00468  | ENSMUSG0000004123Rbbp8       | protein_codi | 11633276 | 11743207 | upstream     | -98344  | 98200  | shortestDistance |
| chr18 | 11592609 | 11593001 | 393  | 2.06  | 1.50E-05 | 0.000232 | ENSMUSG0000004123Rbbp8       | protein_codi | 11633276 | 11743207 | upstream     | -40471  | 40275  | shortestDistance |
| chr18 | 11856784 | 11857138 | 355  | -1.19 | 0.00315  | 0.0175   | ENSMUSG0000004095Cables1     | protein_codi | 11839220 | 11945630 | inside       | 17741   | 17564  | shortestDistance |
| chr18 | 11919438 | 11920145 | 708  | 2.81  | 1.60E-10 | 1.36E-08 | ENSMUSG0000004095Cables1     | protein_codi | 11839220 | 11945630 | inside       | 80572   | 25485  | shortestDistance |
| chr18 | 11946835 | 11947073 | 239  | -1.14 | 0.00761  | 0.0345   | ENSMUSG0000004095Cables1     | protein_codi | 11839220 | 11945630 | downstream   | 107734  | 1205   | shortestDistance |
| chr18 | 11947149 | 11947497 | 349  | -0.92 | 0.0081   | 0.0362   | ENSMUSG0000004095Cables1     | protein_codi | 11839220 | 11945630 | downstream   | 108103  | 1519   | shortestDistance |
| chr18 | 11966974 | 11967582 | 609  | -1.38 | 0.000113 | 0.00124  | ENSMUSG0000004941Tmem241     | protein_codi | 11964450 | 12121537 | inside       | 154259  | 2524   | shortestDistance |
| chr18 | 11973831 | 11974411 | 581  | -1.51 | 0.000364 | 0.00321  | ENSMUSG0000004941Tmem241     | protein_codi | 11964450 | 12121537 | inside       | 147416  | 9381   | shortestDistance |
| chr18 | 12151262 | 12151739 | 478  | 3.14  | 2.36E-11 | 2.75E-09 | ENSMUSG0000002440Riox3       | protein_codi | 12128850 | 12157367 | inside       | 22650   | 5628   | shortestDistance |
| chr18 | 12199519 | 12199360 | 842  | -0.87 | 0.00353  | 0.019    | ENSMUSG0000002441Npc1        | protein_codi | 12186993 | 12236400 | inside       | 36460   | 9826   | shortestDistance |
| chr18 | 12510141 | 12510441 | 301  | -1.39 | 0.00138  | 0.00918  | ENSMUSG0000002442Lama3       | protein_codi | 12333819 | 12583013 | inside       | 176472  | 72572  | shortestDistance |
| chr18 | 12569461 | 12569694 | 234  | -1.33 | 0.00254  | 0.0148   | ENSMUSG0000002442Lama3       | protein_codi | 12333819 | 12583013 | inside       | 235759  | 13319  | shortestDistance |
| chr18 | 12640470 | 12640955 | 486  | 1.88  | 7.64E-05 | 0.000893 | ENSMUSG0000002442Ttc39c      | protein_codi | 12599926 | 12737050 | inside       | 40786   | 40544  | shortestDistance |
| chr18 | 12653309 | 12653663 | 355  | 1.14  | 0.00251  | 0.0146   | ENSMUSG0000002442Ttc39c      | protein_codi | 12599926 | 12737050 | inside       | 53560   | 53883  | shortestDistance |
| chr18 | 12672881 | 12673327 | 447  | 1.4   | 0.000349 | 0.0031   | ENSMUSG0000002442Ttc39c      | protein_codi | 12599926 | 12737050 | inside       | 73178   | 63723  | shortestDistance |
| chr18 | 12927462 | 12927860 | 399  | -1.17 | 0.0105   | 0.044    | ENSMUSG0000002442Uspbl1a     | protein_codi | 12755314 | 12941841 | inside       | 14180   | 13981  | shortestDistance |
| chr18 | 12989429 | 12989752 | 324  | -1.54 | 0.000663 | 0.00516  | ENSMUSG0000002442Impact      | protein_codi | 12972252 | 12992948 | inside       | 17338   | 3196   | shortestDistance |
| chr18 | 13031639 | 13032404 | 766  | -1.21 | 0.000614 | 0.00486  | ENSMUSG0000002442Ttc39c      | protein_codi | 13006990 | 13022882 | downstream   | 25032   | 8757   | shortestDistance |
| chr18 | 13760343 | 13760711 | 369  | -1.01 | 0.00168  | 0.0107   | ENSMUSG0000002442Zfp521      | protein_codi | 13687013 | 13972733 | inside       | 212206  | 73330  | shortestDistance |
| chr18 | 13786982 | 13787906 | 925  | -1.02 | 0.000964 | 0.00693  | ENSMUSG0000002442Zfp521      | protein_codi | 13687013 | 13972733 | inside       | 185289  | 99699  | shortestDistance |
| chr18 | 13838266 | 13838549 | 284  | -1.62 | 0.000221 | 0.00215  | ENSMUSG0000002442Zfp521      | protein_codi | 13687013 | 13972733 | inside       | 134325  | 134184 | shortestDistance |
| chr18 | 13868087 | 13868390 | 304  | -1.04 | 0.00578  | 0.0278   | ENSMUSG0000002442Zfp521      | protein_codi | 13687013 | 13972733 | inside       | 104495  | 104343 | shortestDistance |
| chr18 | 13892854 | 13893267 | 414  | -1.15 | 0.000934 | 0.00676  | ENSMUSG0000002442Zfp521      | protein_codi | 13687013 | 13972733 | inside       | 79673   | 79466  | shortestDistance |
| chr18 | 13949313 | 13944259 | 347  | -2.21 | 4.90E-07 | 1.29E-05 | ENSMUSG0000002442Zfp521      | protein_codi | 13687013 | 13972733 | inside       | 28647   | 28474  | shortestDistance |
| chr18 | 14002452 | 14002783 | 332  | -1.33 | 0.00328  | 0.018    | ENSMUSG0000002442Zfp521      | protein_codi | 13687013 | 13972733 | upstream     | -29885  | 29719  | shortestDistance |
| chr18 | 14063160 | 14063771 | 612  | -1.33 | 0.00618  | 0.0293   | ENSMUSG0000002442Zfp521      | protein_codi | 13687013 | 13972733 | upstream     | -90733  | 90427  | shortestDistance |
| chr18 | 14283034 | 14283331 | 298  | -1.26 | 0.000961 | 0.00691  | ENSMUSG0000005579Gm5160      | protein_codi | 14424868 | 14425311 | upstream     | -141686 | 141537 | shortestDistance |
| chr18 | 14479246 | 14479971 | 726  | -0.97 | 0.00708  | 0.0326   | ENSMUSG0000005579Gm5160      | protein_codi | 14424868 | 14425311 | downstream   | 54740   | 53935  | shortestDistance |
| chr18 | 14657391 | 14657764 | 374  | -1.01 | 0.00773  | 0.0349   | ENSMUSG0000003701Ss18        | protein_codi | 14624198 | 14682914 | inside       | 25336   | 25150  | shortestDistance |
| chr18 | 14968823 | 14968703 | 379  | -1.05 | 0.00174  | 0.011    | ENSMUSG0000003622Kctd1       | protein_codi | 14968685 | 15151446 | overlapEnd   | 182932  | 18     | shortestDistance |
| chr18 | 15000855 | 15001214 | 360  | -1.89 | 5.30E-06 | 9.66E-05 | ENSMUSG0000003622Kctd1       | protein_codi | 14968685 | 15151446 | inside       | 150412  | 32170  | shortestDistance |
| chr18 | 15021406 | 15021852 | 447  | -1.25 | 0.00345  | 0.0187   | ENSMUSG0000003622Kctd1       | protein_codi | 14968685 | 15151446 | inside       | 129817  | 52721  | shortestDistance |
| chr18 | 15119285 | 15119911 | 627  | 2.01  | 1.76E-06 | 3.77E-05 | ENSMUSG0000003622Kctd1       | protein_codi | 14968685 | 15151446 | inside       | 31848   | 31535  | shortestDistance |
| chr18 | 15137084 | 15137460 | 377  | -1.61 | 0.000819 | 0.0061   | ENSMUSG0000003622Kctd1       | protein_codi | 14968685 | 15151446 | inside       | 14174   | 13986  | shortestDistance |
| chr18 | 15201399 | 15202070 | 672  | 1.14  | 0.00545  | 0.0267   | ENSMUSG0000003622Kctd1       | protein_codi | 14968685 | 15151446 | upstream     | -50288  | 49953  | shortestDistance |
| chr18 | 15283703 | 15284058 | 356  | -1.39 | 0.00607  | 0.0289   | ENSMUSG0000002441Aqp4        | protein_codi | 15389394 | 15403684 | downstream   | 119804  | 105336 | shortestDistance |
| chr18 | 15312380 | 15313456 | 1077 | -1.09 | 0.00292  | 0.0164   | ENSMUSG0000002441Aqp4        | protein_codi | 15389394 | 15403684 | downstream   | 90766   | 75938  | shortestDistance |
| chr18 | 15342062 | 15342661 | 600  | -1.07 | 0.00103  | 0.00732  | ENSMUSG0000002441Aqp4        | protein_codi | 15389394 | 15403684 | downstream   | 61322   | 46733  | shortestDistance |
| chr18 | 15351688 | 15352050 | 363  | -1.07 | 0.00171  | 0.0109   | ENSMUSG0000002441Aqp4        | protein_codi | 15389394 | 15403684 | downstream   | 51815   | 37344  | shortestDistance |
| chr18 | 16216857 | 16217426 | 570  | -1.37 | 0.000398 | 0.00345  | ENSMUSG0000008464Gm24385     | misc_RNA     | 16221019 | 16221368 | downstream   | 4226    | 3593   | shortestDistance |
| chr18 | 16273513 | 16273956 | 444  | -1.59 | 0.000438 | 0.00372  | ENSMUSG0000003632Gm7665      | processed_g  | 16274648 | 16274944 | downstream   | 1210    | 692    | shortestDistance |
| chr18 | 16808122 | 16808621 | 494  | -1.54 | 2.00E-05 | 0.000296 | ENSMUSG0000002432Cdh2        | protein_codi | 16588877 | 16809246 | inside       | 872     | 625    | shortestDistance |
| chr18 | 16808778 | 16808989 | 1178 | -0.99 | 0.00288  | 0.0163   | ENSMUSG0000002432Cdh2        | protein_codi | 16588877 | 16809246 | overlapStart | -64     | 524    | shortestDistance |
| chr18 | 16822020 | 16822511 | 492  | -1.26 |          |          |                              |              |          |          |              |         |        |                  |

|       |          |           |      |       |          |          |                              |              |          |          |              |         |        |                  |
|-------|----------|-----------|------|-------|----------|----------|------------------------------|--------------|----------|----------|--------------|---------|--------|------------------|
| chr18 | 21382762 | 21383244  | 483  | -0.81 | 0.00928  | 0.0401   | ENSMUSG0000009634Gm22886     | snRNA        | 21380825 | 21380931 | upstream     | -2072   | 1831   | shortestDistance |
| chr18 | 21408912 | 21409457  | 546  | -3.5  | 6.61E-14 | 1.96E-11 | ENSMUSG0000009634Gm22886     | snRNA        | 21380825 | 21380931 | upstream     | -28253  | 27981  | shortestDistance |
| chr18 | 21423061 | 21423378  | 318  | -2.18 | 5.08E-08 | 1.87E-06 | ENSMUSG0000009634Gm22886     | snRNA        | 21380825 | 21380931 | upstream     | -42289  | 42130  | shortestDistance |
| chr18 | 21434810 | 21435677  | 868  | -1.58 | 1.07E-06 | 2.49E-05 | ENSMUSG0000009634Gm22886     | snRNA        | 21380825 | 21380931 | upstream     | -54313  | 53879  | shortestDistance |
| chr18 | 21563716 | 21564267  | 552  | -2.24 | 4.50E-09 | 2.32E-07 | ENSMUSG0000004251Khl14       | protein_codi | 21550377 | 21654718 | inside       | 90726   | 13339  | shortestDistance |
| chr18 | 21593619 | 21594137  | 519  | -0.89 | 0.00539  | 0.0264   | ENSMUSG0000004251Khl14       | protein_codi | 21550377 | 21654718 | inside       | 60840   | 43242  | shortestDistance |
| chr18 | 21639360 | 21639693  | 334  | -1.84 | 7.34E-05 | 0.000865 | ENSMUSG0000004251Khl14       | protein_codi | 21550377 | 21654718 | inside       | 15192   | 15025  | shortestDistance |
| chr18 | 21639969 | 21640672  | 704  | -1.9  | 1.46E-07 | 4.57E-06 | ENSMUSG0000004251Khl14       | protein_codi | 21550377 | 21654718 | inside       | 14398   | 14046  | shortestDistance |
| chr18 | 21651738 | 21652399  | 662  | -2.21 | 2.15E-10 | 1.75E-08 | ENSMUSG00000043164930426050  | antisense_RI | 21651448 | 21656105 | inside       | 620     | 290    | shortestDistance |
| chr18 | 21653001 | 21653551  | 551  | -1.56 | 7.06E-05 | 0.000838 | ENSMUSG0000004251Khl14       | protein_codi | 21550377 | 21654718 | inside       | 1442    | 1167   | shortestDistance |
| chr18 | 21653625 | 21654027  | 403  | -1.44 | 7.18E-05 | 0.00085  | ENSMUSG0000004251Khl14       | protein_codi | 21550377 | 21654718 | inside       | 892     | 691    | shortestDistance |
| chr18 | 21675492 | 21676322  | 831  | -2.57 | 3.93E-08 | 1.51E-06 | ENSMUSG00000043164930426050  | antisense_RI | 21651448 | 21656105 | downstream   | 24459   | 19387  | shortestDistance |
| chr18 | 21709043 | 21709343  | 301  | -2.09 | 3.92E-06 | 7.46E-05 | ENSMUSG00000043164930426050  | antisense_RI | 21651448 | 21656105 | downstream   | 57745   | 52938  | shortestDistance |
| chr18 | 21775120 | 21775451  | 332  | -0.95 | 0.0029   | 0.0164   | ENSMUSG0000002430Cdc178      | protein_codi | 21810897 | 22171396 | downstream   | 396110  | 35446  | shortestDistance |
| chr18 | 22030963 | 22031364  | 402  | -1.2  | 0.00035  | 0.00311  | ENSMUSG0000002430Cdc178      | protein_codi | 21810897 | 22171396 | upside       | 140232  | 140032 | shortestDistance |
| chr18 | 22343402 | 22344195  | 794  | -1.26 | 0.000738 | 0.00561  | ENSMUSG0000004521Axl3        | protein_codi | 22344883 | 22530227 | upstream     | -1085   | 688    | shortestDistance |
| chr18 | 22344326 | 22345225  | 900  | -1.44 | 3.94E-05 | 0.000519 | ENSMUSG0000004521Axl3        | protein_codi | 22344883 | 22530227 | overlapStart | -107    | 342    | shortestDistance |
| chr18 | 22530304 | 22530881  | 542  | -1.48 | 0.000131 | 0.0014   | ENSMUSG0000004521Axl3        | protein_codi | 22344883 | 22530227 | downstream   | 185727  | 113    | shortestDistance |
| chr18 | 22596018 | 22596322  | 305  | -2.09 | 0.00013  | 0.00138  | ENSMUSG0000004521Axl3        | protein_codi | 22344883 | 22530227 | downstream   | 251287  | 65791  | shortestDistance |
| chr18 | 22936022 | 22936514  | 493  | -1.08 | 0.00252  | 0.0147   | ENSMUSG0000004192No14        | protein_codi | 22693181 | 23041653 | inside       | 105385  | 105139 | shortestDistance |
| chr18 | 22984932 | 22985712  | 781  | -1.46 | 8.70E-06 | 0.000147 | ENSMUSG0000004192No14        | protein_codi | 22693181 | 23041653 | inside       | 56331   | 55941  | shortestDistance |
| chr18 | 23038705 | 23039645  | 941  | -1.04 | 0.00138  | 0.00919  | ENSMUSG0000004192No14        | protein_codi | 22693181 | 23041653 | inside       | 2478    | 2008   | shortestDistance |
| chr18 | 23041049 | 23041656  | 608  | -1.25 | 0.000862 | 0.00634  | ENSMUSG0000004192No14        | protein_codi | 22693181 | 23041653 | overlapStart | 301     | 3      | shortestDistance |
| chr18 | 23092998 | 23093471  | 474  | -1.28 | 0.000791 | 0.00592  | ENSMUSG0000004192No14        | protein_codi | 22693181 | 23041653 | upstream     | -51581  | 51345  | shortestDistance |
| chr18 | 23094015 | 23094527  | 513  | -1.1  | 0.00105  | 0.00739  | ENSMUSG0000004192No14        | protein_codi | 22693181 | 23041653 | upstream     | -52618  | 52362  | shortestDistance |
| chr18 | 23197243 | 23197618  | 376  | -1.04 | 0.0112   | 0.0461   | ENSMUSG0000007768Gm22495     | snRNA        | 23147094 | 23147219 | downstream   | 50336   | 50024  | shortestDistance |
| chr18 | 23222747 | 23223215  | 469  | -1.94 | 0.000207 | 0.00203  | ENSMUSG0000007768Gm22495     | snRNA        | 23147094 | 23147219 | downstream   | 75887   | 75528  | shortestDistance |
| chr18 | 23410175 | 23410631  | 457  | -1.44 | 0.00262  | 0.00246  | ENSMUSG0000002430Dtna        | protein_codi | 23415135 | 23659715 | upstream     | -4732   | 4504   | shortestDistance |
| chr18 | 23415046 | 23415770  | 725  | -2.14 | 9.75E-07 | 2.30E-05 | ENSMUSG0000002430Dtna        | protein_codi | 23415135 | 23659715 | overlapStart | 273     | 89     | shortestDistance |
| chr18 | 23497378 | 23497729  | 352  | -2.18 | 3.66E-06 | 7.05E-05 | ENSMUSG0000002430Dtna        | protein_codi | 23415135 | 23659715 | inside       | 82419   | 82243  | shortestDistance |
| chr18 | 23498020 | 23498653  | 634  | -2.28 | 7.70E-08 | 2.66E-06 | ENSMUSG0000002430Dtna        | protein_codi | 23415135 | 23659715 | inside       | 83201   | 82885  | shortestDistance |
| chr18 | 23552449 | 23552781  | 333  | -1.29 | 0.00188  | 0.0117   | ENSMUSG0000002430Dtna        | protein_codi | 23415135 | 23659715 | inside       | 137480  | 106934 | shortestDistance |
| chr18 | 23566034 | 23566725  | 692  | -1.26 | 9.88E-05 | 0.0011   | ENSMUSG0000002430Dtna        | protein_codi | 23415135 | 23659715 | inside       | 151245  | 92990  | shortestDistance |
| chr18 | 23627999 | 23628268  | 270  | -1.13 | 0.0111   | 0.046    | ENSMUSG0000002430Dtna        | protein_codi | 23415135 | 23659715 | inside       | 212999  | 31447  | shortestDistance |
| chr18 | 23737111 | 23737663  | 553  | -1.09 | 0.00228  | 0.0136   | ENSMUSG0000002427Mpre2       | protein_codi | 23752333 | 23893861 | inside       | 21054   | 20778  | shortestDistance |
| chr18 | 23911987 | 23912539  | 553  | 2.71  | 1.22E-09 | 7.64E-08 | ENSMUSG0000002427Mpre2       | protein_codi | 23752333 | 23893861 | downstream   | 159930  | 18126  | shortestDistance |
| chr18 | 23942027 | 23942743  | 537  | -1.12 | 0.000878 | 0.00643  | ENSMUSG0000002427Zfp397      | protein_codi | 23954692 | 23964673 | upstream     | -12217  | 11949  | shortestDistance |
| chr18 | 24103928 | 24104314  | 387  | 1.06  | 0.00692  | 0.0321   | ENSMUSG0000004798Ino80c      | protein_codi | 24104757 | 24121953 | downstream   | 17832   | 443    | shortestDistance |
| chr18 | 24466750 | 24468062  | 1313 | -1    | 0.00299  | 0.0167   | ENSMUSG00000024272700662C071 | protein_codi | 24470861 | 24477765 | upstream     | -3455   | 2799   | shortestDistance |
| chr18 | 24652067 | 24652410  | 344  | 1.6   | 0.000237 | 0.00227  | ENSMUSG0000003961Mocos       | protein_codi | 24653691 | 24701556 | upstream     | -1453   | 1281   | shortestDistance |
| chr18 | 24675419 | 24675684  | 266  | -0.97 | 0.00436  | 0.0224   | ENSMUSG0000003961Mocos       | protein_codi | 24653691 | 24701556 | inside       | 21861   | 21728  | shortestDistance |
| chr18 | 24763319 | 247736813 | 495  | -0.87 | 0.00583  | 0.028    | ENSMUSG0000003429Fhd3        | protein_codi | 24709445 | 25133500 | inside       | 27121   | 26874  | shortestDistance |
| chr18 | 24776880 | 24777130  | 251  | -1.47 | 0.00232  | 0.0138   | ENSMUSG0000003429Fhd3        | protein_codi | 24709445 | 25133500 | inside       | 67560   | 67435  | shortestDistance |
| chr18 | 24818802 | 24819054  | 253  | -2.28 | 1.12E-05 | 0.000182 | ENSMUSG0000003429Fhd3        | protein_codi | 24709445 | 25133500 | inside       | 109483  | 109357 | shortestDistance |
| chr18 | 24871983 | 24872588  | 606  | -1.39 | 7.25E-05 | 0.000857 | ENSMUSG0000003429Fhd3        | protein_codi | 24709445 | 25133500 | inside       | 162841  | 162538 | shortestDistance |
| chr18 | 24913462 | 24913801  | 340  | -1.63 | 1.84E-05 | 0.000276 | ENSMUSG0000003429Fhd3        | protein_codi | 24709445 | 25133500 | inside       | 204187  | 204017 | shortestDistance |
| chr18 | 24918808 | 24919697  | 890  | -1.09 | 0.00587  | 0.0282   | ENSMUSG0000003429Fhd3        | protein_codi | 24709445 | 25133500 | inside       | 209807  | 209363 | shortestDistance |
| chr18 | 24960351 | 24960804  | 454  | -1.95 | 3.41E-08 | 1.34E-06 | ENSMUSG0000003429Fhd3        | protein_codi | 24709445 | 25133500 | inside       | 251133  | 172696 | shortestDistance |
| chr18 | 25078378 | 25078721  | 344  | -1.38 | 0.00071  | 0.00544  | ENSMUSG0000003429Fhd3        | protein_codi | 24709445 | 25133500 | inside       | 369105  | 54779  | shortestDistance |
| chr18 | 25122075 | 25122415  | 341  | -0.95 | 0.0109   | 0.0453   | ENSMUSG0000003429Fhd3        | protein_codi | 24709445 | 25133500 | inside       | 412800  | 11085  | shortestDistance |
| chr18 | 25134382 | 25134649  | 268  | -2.85 | 1.16E-07 | 3.79E-06 | ENSMUSG0000002426Tpgs2       | protein_codi | 25127223 | 25169007 | inside       | 34491   | 7159   | shortestDistance |
| chr18 | 25241421 | 25242177  | 757  | -0.82 | 0.00513  | 0.0254   | ENSMUSG0000003363AW554918    | protein_codi | 25168999 | 25467321 | inside       | 72800   | 72422  | shortestDistance |
| chr18 | 25242429 | 25242712  | 284  | -1.05 | 0.00137  | 0.00916  | ENSMUSG0000003363AW554918    | protein_codi | 25168999 | 25467321 | inside       | 73571   | 73430  | shortestDistance |
| chr18 | 25244755 | 25245073  | 319  | -1.99 | 6.62E-06 | 0.000117 | ENSMUSG0000003363AW554918    | protein_codi | 25168999 | 25467321 | inside       | 75915   | 75756  | shortestDistance |
| chr18 | 25282445 | 25282766  | 322  | -1.21 | 0.00538  | 0.0264   | ENSMUSG0000003363AW554918    | protein_codi | 25168999 | 25467321 | inside       | 113607  | 113446 | shortestDistance |
| chr18 | 25321064 | 25321402  | 339  | -1.25 | 0.000426 | 0.00364  | ENSMUSG0000003363AW554918    | protein_codi | 25168999 | 25467321 | inside       | 152234  | 145919 | shortestDistance |
| chr18 | 25486417 | 25487953  | 1537 | -1.17 | 0.000231 | 0.00222  | ENSMUSG0000002426Celf4       | protein_codi | 25477632 | 25754157 | inside       | 266972  | 8785   | shortestDistance |
| chr18 | 25515937 | 25516580  | 644  | -1.45 | 0.000209 | 0.00204  | ENSMUSG0000002426Celf4       | protein_codi | 25477632 | 25754157 | inside       | 237899  | 38305  | shortestDistance |
| chr18 | 25537867 | 25538605  | 739  | -1.4  | 3.64E-05 | 0.000487 | ENSMUSG0000002426Celf4       | protein_codi | 25477632 | 25754157 | inside       | 215921  | 60235  | shortestDistance |
| chr18 | 25545951 | 25546191  | 241  | -2.45 | 8.12E-08 | 2.79E-06 | ENSMUSG0000002426Celf4       | protein_codi | 25477632 | 25754157 | inside       | 208086  | 66319  | shortestDistance |
| chr18 | 25548280 | 25548918  | 639  | -1.84 | 1.08E-06 | 2.51E-05 | ENSMUSG0000002426Celf4       | protein_codi | 25477632 | 25754157 | inside       | 205558  | 70648  | shortestDistance |
| chr18 | 25590314 | 25591321  | 1008 | -1.12 | 0.000291 | 0.00267  | ENSMUSG0000002426Celf4       | protein_codi | 25477632 | 25754157 | inside       | 163339  | 112682 | shortestDistance |
| chr18 | 25621328 | 25621898  | 571  | -1.17 | 0.00166  | 0.0106   | ENSMUSG0000002426Celf4       | protein_codi | 25477632 | 25754157 | inside       | 132544  | 132259 | shortestDistance |
| chr18 | 25670590 | 25670850  | 261  | -0.99 | 0.00832  | 0.0369   | ENSMUSG0000002426Celf4       | protein_codi | 25477632 | 25754157 | inside       | 83437   | 83307  | shortestDistance |
| chr18 | 25678915 | 25679576  | 662  | -1.28 | 0.000407 | 0.00351  | ENSMUSG0000002426Celf4       | protein_codi | 25477632 | 25754157 | inside       | 74911   | 74581  | shortestDistance |
| chr18 | 25726663 | 25727226  | 564  | -0.93 | 0.00709  | 0.0326   | ENSMUSG0000002426Celf4       | protein_codi | 25477632 | 25754157 | inside       | 27213   | 26931  | shortestDistance |
| chr18 | 25883369 | 25883956  | 588  | 1.56  | 0.00298  | 0.0167   | ENSMUSG0000008712Gm7847      | processed_p  | 25823581 | 25824357 | upstream     | -59305  | 59012  | shortestDistance |
| chr18 | 26014948 | 26015602  | 655  | -1.5  | 2.79E-05 | 0.000389 | ENSMUSG0000008712Gm7847      | processed_p  | 25823581 | 25824357 | upstream     | -190918 | 190591 | shortestDistance |
| chr18 | 26291620 | 26292053  | 434  | -1.79 | 0.000123 | 0.00132  | ENSMUSG0000008809Gm23674     | snRNA        | 26495435 | 26495565 | upstream     | -203599 | 203382 | shortestDistance |
| chr18 | 26406389 | 26406677  | 289  | -2.21 | 7.26E-07 | 1.79E-05 | ENSMUSG0000008809Gm23674     | snRNA        | 26495435 | 26495565 | upstream     | -88902  | 88758  | shortestDistance |
| chr18 | 26424374 | 26424982  | 609  | -1.75 | 3.62E-06 | 6.97E-05 | ENSMUSG0000008809Gm23674     | snRNA        | 26495435 | 26495565 | upstream     | -70757  | 70453  | shortestDistance |
| chr18 | 26425137 | 26425527  | 391  | -1.69 | 0.00015  | 0.00156  | ENSMUSG0000008809Gm23674     | snRNA        | 26495435 | 264      |              |         |        |                  |

|       |          |          |      |       |          |          |                    |             |              |          |          |              |         |        |                  |
|-------|----------|----------|------|-------|----------|----------|--------------------|-------------|--------------|----------|----------|--------------|---------|--------|------------------|
| chr18 | 35941784 | 35942546 | 763  | 1.03  | 0.0031   | 0.0172   | ENSMUSG0000008052  | Gm23882     | miRNA        | 35952824 | 35952907 | upstream     | -10659  | 10278  | shortestDistance |
| chr18 | 36130307 | 36130729 | 423  | 1.55  | 0.000214 | 0.00208  | ENSMUSG0000006027  | Nrg2        | protein_codi | 36017707 | 36197380 | inside       | 66862   | 66651  | shortestDistance |
| chr18 | 36155648 | 36156089 | 442  | 2.64  | 1.94E-08 | 8.25E-07 | ENSMUSG0000006027  | Nrg2        | protein_codi | 36017707 | 36197380 | inside       | 41512   | 41291  | shortestDistance |
| chr18 | 36194657 | 36194923 | 267  | 1     | 0.0105   | 0.0441   | ENSMUSG0000006027  | Nrg2        | protein_codi | 36017707 | 36197380 | inside       | 2590    | 2457   | shortestDistance |
| chr18 | 36403173 | 36403522 | 350  | -1.47 | 0.000265 | 0.00248  | ENSMUSG0000002434  | Pdfr1       | protein_codi | 36403679 | 36454495 | downstream   | 51147   | 157    | shortestDistance |
| chr18 | 36423115 | 36423572 | 458  | -2.77 | 0.00185  | 0.0116   | ENSMUSG0000002434  | Pdfr1       | protein_codi | 36403679 | 36454495 | inside       | 31151   | 19436  | shortestDistance |
| chr18 | 36708637 | 36709327 | 691  | 2.32  | 7.23E-11 | 7.03E-09 | ENSMUSG0000004471  | E230025N22  | protein_codi | 36684923 | 36695925 | upstream     | -13057  | 12712  | shortestDistance |
| chr18 | 36719841 | 36720321 | 481  | 2.35  | 2.80E-06 | 5.62E-05 | ENSMUSG0000005143  | Cd14        | protein_codi | 36725074 | 36726736 | downstream   | 6655    | 4753   | shortestDistance |
| chr18 | 36967434 | 36967700 | 267  | -1.12 | 0.00694  | 0.0321   | ENSMUSG0000010370  | Pcdha6      | protein_codi | 36967631 | 37187657 | overlapStart | -64     | 69     | shortestDistance |
| chr18 | 36992179 | 36992659 | 481  | -1.77 | 0.000514 | 0.00422  | ENSMUSG0000010380  | Pcdha8      | protein_codi | 36992371 | 37187657 | overlapStart | 48      | 192    | shortestDistance |
| chr18 | 36992730 | 36993080 | 351  | -1.23 | 0.0037   | 0.0197   | ENSMUSG0000010380  | Pcdha8      | protein_codi | 36992371 | 37187657 | inside       | 534     | 359    | shortestDistance |
| chr18 | 36997648 | 36998139 | 492  | -1.1  | 0.004    | 0.021    | ENSMUSG0000010377  | Pcdha9      | protein_codi | 36997880 | 37187657 | overlapStart | 14      | 232    | shortestDistance |
| chr18 | 37010503 | 37010807 | 305  | -1.81 | 5.23E-05 | 0.00655  | ENSMUSG0000010220  | Pcdha11     | protein_codi | 37010712 | 37187657 | overlapStart | -57     | 95     | shortestDistance |
| chr18 | 37089596 | 37090406 | 811  | -1.15 | 0.0014   | 0.00928  | ENSMUSG0000010325  | Pcdhac1     | protein_codi | 37090013 | 37187657 | overlapStart | -12     | 393    | shortestDistance |
| chr18 | 37142341 | 37142662 | 322  | -2.03 | 1.55E-08 | 6.86E-07 | ENSMUSG0000010325  | Pcdhac1     | protein_codi | 37090013 | 37187657 | inside       | 52489   | 44995  | shortestDistance |
| chr18 | 37143389 | 37144742 | 1354 | -1.57 | 2.13E-06 | 4.44E-05 | ENSMUSG0000010269  | Pcdhac2     | protein_codi | 37143503 | 37187657 | overlapStart | 563     | 114    | shortestDistance |
| chr18 | 37178282 | 37178781 | 500  | -2.2  | 2.54E-06 | 5.16E-05 | ENSMUSG0000009743  | Gm10544     | processed_tr | 37159854 | 37178522 | overlapStart | -10     | 240    | shortestDistance |
| chr18 | 37264598 | 37265554 | 957  | -2.47 | 4.48E-13 | 9.53E-11 | ENSMUSG0000005166  | Pcdhb1      | protein_codi | 37264938 | 37267525 | overlapStart | 138     | 340    | shortestDistance |
| chr18 | 37300617 | 37300932 | 316  | -1.03 | 0.00317  | 0.0175   | ENSMUSG0000004549  | Pcdhb3      | protein_codi | 37300799 | 37304585 | overlapStart | -25     | 133    | shortestDistance |
| chr18 | 37302995 | 37303337 | 343  | -1.76 | 3.32E-06 | 6.49E-05 | ENSMUSG0000004549  | Pcdhb3      | protein_codi | 37300799 | 37304585 | inside       | 2367    | 1248   | shortestDistance |
| chr18 | 37307267 | 37307550 | 284  | -1.57 | 0.000642 | 0.00503  | ENSMUSG0000004568  | Pcdhb4      | protein_codi | 37307455 | 37311172 | overlapStart | -47     | 95     | shortestDistance |
| chr18 | 37413953 | 37414211 | 259  | -1.09 | 0.0106   | 0.0445   | ENSMUSG0000004565  | Pcdhb10     | protein_codi | 37411664 | 37414514 | inside       | 2418    | 303    | shortestDistance |
| chr18 | 37442183 | 37442484 | 302  | -1.45 | 0.000141 | 0.00148  | ENSMUSG0000010312  | Gm37388     | protein_codi | 36975941 | 37833296 | inside       | 466393  | 390812 | shortestDistance |
| chr18 | 37477619 | 37478086 | 468  | -1.43 | 0.000117 | 0.00127  | ENSMUSG0000004791  | Pcdhb16     | protein_codi | 37477814 | 37483038 | overlapStart | 38      | 195    | shortestDistance |
| chr18 | 37484758 | 37485082 | 325  | -1.06 | 0.00393  | 0.0207   | ENSMUSG0000004638  | Pcdhb17     | protein_codi | 37484795 | 37489454 | overlapStart | 125     | 37     | shortestDistance |
| chr18 | 37661556 | 37662142 | 587  | -1.1  | 0.0013   | 0.00879  | ENSMUSG0000010314  | Pcdhga1     | protein_codi | 37661793 | 37841873 | overlapStart | 56      | 237    | shortestDistance |
| chr18 | 37707137 | 37707593 | 457  | -1.02 | 0.0124   | 0.0498   | ENSMUSG0000010379  | Pcdhga6     | protein_codi | 37707039 | 37841873 | inside       | 326     | 98     | shortestDistance |
| chr18 | 37714605 | 37715234 | 630  | -1.51 | 2.63E-05 | 0.000371 | ENSMUSG0000010347  | Pcdhga7     | protein_codi | 37714764 | 37841873 | overlapStart | 156     | 159    | shortestDistance |
| chr18 | 37741484 | 37742556 | 713  | -0.93 | 0.00636  | 0.03     | ENSMUSG0000010308  | Pcdhgb6     | protein_codi | 37742094 | 37841873 | overlapStart | 106     | 250    | shortestDistance |
| chr18 | 37800835 | 37801084 | 250  | -1.27 | 0.0021   | 0.0128   | ENSMUSG0000010242  | Pcdhga12    | protein_codi | 37765580 | 37841873 | inside       | 35380   | 35255  | shortestDistance |
| chr18 | 37805904 | 37807362 | 1459 | -0.92 | 0.00175  | 0.0111   | ENSMUSG0000010291  | Pcdhgc3     | protein_codi | 37806364 | 37841873 | overlapStart | 269     | 460    | shortestDistance |
| chr18 | 37814577 | 37815886 | 1310 | -0.98 | 0.00104  | 0.00736  | ENSMUSG0000002033  | Pcdhgc4     | protein_codi | 37815079 | 37841873 | overlapStart | 153     | 502    | shortestDistance |
| chr18 | 37824886 | 37825794 | 909  | -0.99 | 0.00107  | 0.00752  | ENSMUSG0000010280  | Gm38182     | processed_tr | 37823879 | 37840382 | inside       | 1461    | 1007   | shortestDistance |
| chr18 | 37835262 | 37836545 | 1284 | -2.5  | 1.02E-08 | 4.75E-07 | ENSMUSG0000010282  | Gm38182     | processed_tr | 37823879 | 37840382 | inside       | 12025   | 3837   | shortestDistance |
| chr18 | 37924248 | 37924660 | 413  | 1.32  | 0.00194  | 0.012    | ENSMUSG0000002445  | Diaph1      | protein_codi | 37843601 | 37935476 | inside       | 11022   | 10816  | shortestDistance |
| chr18 | 37985307 | 37985832 | 526  | -0.92 | 0.0123   | 0.0495   | ENSMUSG0000002445  | Arap3       | protein_codi | 37972624 | 37997574 | inside       | 12004   | 11742  | shortestDistance |
| chr18 | 38067876 | 38068377 | 502  | -2.07 | 9.22E-07 | 2.19E-05 | ENSMUSG0000002445  | Arap3       | protein_codi | 37972624 | 37997574 | upstream     | -70552  | 70302  | shortestDistance |
| chr18 | 38118828 | 38119473 | 646  | 0.85  | 0.0101   | 0.0428   | ENSMUSG00000005137 | Pcdh1       | protein_codi | 38185914 | 38212053 | downstream   | 92903   | 66441  | shortestDistance |
| chr18 | 38190525 | 38190901 | 377  | -1.13 | 0.00178  | 0.0112   | ENSMUSG0000005137  | Pcdh1       | protein_codi | 38185914 | 38212053 | inside       | 21340   | 4611   | shortestDistance |
| chr18 | 38209902 | 38210222 | 321  | -0.99 | 0.00604  | 0.0288   | ENSMUSG0000008998  | 2010320007  | processed_tr | 38209772 | 38229145 | inside       | 290     | 130    | shortestDistance |
| chr18 | 38348548 | 38348941 | 394  | -1.12 | 0.00161  | 0.0104   | ENSMUSG0000008838  | Gm24690     | rRNA         | 38356578 | 38356674 | upstream     | -7834   | 7637   | shortestDistance |
| chr18 | 38597160 | 38597468 | 309  | -1.02 | 0.00443  | 0.0227   | ENSMUSG0000002442  | Spry4       | protein_codi | 38586268 | 38601268 | inside       | 3954    | 3800   | shortestDistance |
| chr18 | 38761708 | 38762213 | 506  | -1.64 | 8.81E-06 | 0.000148 | ENSMUSG0000002643  | Arhgap26    | protein_codi | 38601534 | 39376284 | inside       | 160426  | 160174 | shortestDistance |
| chr18 | 38823800 | 38824100 | 301  | 1.62  | 0.000774 | 0.00582  | ENSMUSG0000003645  | Arhgap26    | protein_codi | 38601534 | 39376284 | inside       | 222416  | 222266 | shortestDistance |
| chr18 | 38868377 | 38868867 | 491  | -0.98 | 0.00625  | 0.0296   | ENSMUSG0000003658  | Fgf1        | protein_codi | 38838673 | 38929404 | inside       | 60782   | 29704  | shortestDistance |
| chr18 | 38881748 | 38882452 | 705  | -1.54 | 4.59E-05 | 0.000588 | ENSMUSG0000003658  | Fgf1        | protein_codi | 38838673 | 38929404 | inside       | 47304   | 43075  | shortestDistance |
| chr18 | 38938672 | 38939667 | 996  | 2.58  | 4.34E-10 | 3.16E-08 | ENSMUSG0000003645  | Arhgap26    | protein_codi | 38601534 | 39376284 | inside       | 337636  | 337138 | shortestDistance |
| chr18 | 38940433 | 38940737 | 305  | 1.04  | 0.00369  | 0.0197   | ENSMUSG0000003645  | Arhgap26    | protein_codi | 38601534 | 39376284 | inside       | 339051  | 338899 | shortestDistance |
| chr18 | 39083746 | 39084223 | 478  | -1.06 | 0.00415  | 0.0216   | ENSMUSG0000003645  | Arhgap26    | protein_codi | 38601534 | 39376284 | inside       | 482450  | 292061 | shortestDistance |
| chr18 | 39145287 | 39145631 | 345  | 1.32  | 0.00186  | 0.0116   | ENSMUSG0000003645  | Arhgap26    | protein_codi | 38601534 | 39376284 | inside       | 543925  | 230653 | shortestDistance |
| chr18 | 39319168 | 39319395 | 228  | 2.35  | 0.000281 | 0.0026   | ENSMUSG0000003645  | Arhgap26    | protein_codi | 38601534 | 39376284 | inside       | 171748  | 56889  | shortestDistance |
| chr18 | 39374395 | 39374968 | 574  | -1.51 | 7.35E-05 | 0.000866 | ENSMUSG0000008528  | Gm15337     | antisense_RI | 39367038 | 39389425 | inside       | 14743   | 7357   | shortestDistance |
| chr18 | 39445969 | 39446358 | 390  | 1.14  | 0.00548  | 0.0268   | ENSMUSG0000002443  | Nr3c1       | protein_codi | 39410545 | 39491301 | inside       | 45137   | 35424  | shortestDistance |
| chr18 | 39460795 | 39461167 | 373  | -1.32 | 0.00148  | 0.00969  | ENSMUSG0000002443  | Nr3c1       | protein_codi | 39410545 | 39491301 | inside       | 30320   | 30134  | shortestDistance |
| chr18 | 39516507 | 39516778 | 272  | -1.7  | 4.94E-05 | 0.000625 | ENSMUSG0000002443  | Nr3c1       | protein_codi | 39410545 | 39491301 | upstream     | -25341  | 25206  | shortestDistance |
| chr18 | 39526041 | 39526423 | 383  | 2.23  | 3.10E-06 | 6.12E-05 | ENSMUSG0000002443  | Nr3c1       | protein_codi | 39410545 | 39491301 | upstream     | -34931  | 34740  | shortestDistance |
| chr18 | 39560690 | 39561375 | 686  | 1.92  | 3.99E-08 | 1.53E-06 | ENSMUSG0000002443  | Nr3c1       | protein_codi | 39410545 | 39491301 | upstream     | -69731  | 69389  | shortestDistance |
| chr18 | 39635727 | 39636293 | 567  | -0.97 | 0.00914  | 0.0396   | ENSMUSG00000005173 | Pabpc2      | protein_codi | 39773497 | 39776082 | upstream     | -137487 | 137204 | shortestDistance |
| chr18 | 39636393 | 39636774 | 382  | -1.42 | 0.000868 | 0.00637  | ENSMUSG00000005173 | Pabpc2      | protein_codi | 39773497 | 39776082 | upstream     | -136913 | 136723 | shortestDistance |
| chr18 | 39650287 | 39650778 | 492  | -0.88 | 0.00758  | 0.0343   | ENSMUSG00000005173 | Pabpc2      | protein_codi | 39773497 | 39776082 | upstream     | -122965 | 122719 | shortestDistance |
| chr18 | 39654998 | 39655472 | 475  | -1.23 | 0.00235  | 0.014    | ENSMUSG00000005173 | Pabpc2      | protein_codi | 39773497 | 39776082 | upstream     | -118262 | 118025 | shortestDistance |
| chr18 | 39866188 | 39867133 | 946  | -0.94 | 0.00411  | 0.0214   | ENSMUSG00000005173 | Pabpc2      | protein_codi | 39773497 | 39776082 | downstream   | 93163   | 90106  | shortestDistance |
| chr18 | 39877810 | 39878190 | 381  | -1.01 | 0.0044   | 0.0226   | ENSMUSG00000005173 | Pabpc2      | protein_codi | 39773497 | 39776082 | downstream   | 104503  | 101728 | shortestDistance |
| chr18 | 40029128 | 40029420 | 293  | -1.05 | 0.00602  | 0.0288   | ENSMUSG0000002448  | Vipf5       | protein_codi | 40204865 | 40219399 | downstream   | 190125  | 175445 | shortestDistance |
| chr18 | 40068444 | 40069040 | 597  | -1.61 | 9.55E-05 | 0.00107  | ENSMUSG0000002448  | Vipf5       | protein_codi | 40204865 | 40219399 | downstream   | 150657  | 135825 | shortestDistance |
| chr18 | 40256610 | 40257103 | 494  | -1.12 | 0.00393  | 0.0207   | ENSMUSG0000007186  | 2900055120R | protein_codi | 40256962 | 40257684 | overlapStart | -106    | 141    | shortestDistance |
| chr18 | 40404666 | 40404864 | 399  | 1.12  | 0.00797  | 0.0357   | ENSMUSG00000005140 | Kctd16      | protein_codi | 40258361 | 40531168 | inside       | 182304  | 90304  | shortestDistance |
| chr18 | 40455218 | 40455526 | 309  | -0.97 | 0.00899  | 0.0391   | ENSMUSG00000005140 | Kctd16      | protein_codi | 40258361 | 40531168 | inside       | 197011  | 75642  | shortestDistance |
| chr18 | 41567247 | 41567593 | 347  | -3.06 | 8.12E-12 | 1.12E-09 | ENSMUSG0000010516  | Gm44476     | miRNA        | 41342281 | 41342371 | upstream     | -225049 | 224876 | shortestDistance |
| chr18 | 41752752 | 41753396 | 645  | -1.35 | 0.000115 | 0.00125  | ENSMUSG0000005667  | Prelid2     | protein_codi | 41875696 | 41951194 | downstream   | 198120  | 122300 | shortestDistance |
| chr18 | 41860981 | 41861731 | 751  | -1.5  | 6.47E-06 | 0.000114 | ENSMUS             |             |              |          |          |              |         |        |                  |

|       |          |          |      |       |          |          |                                         |              |          |          |              |        |        |                  |
|-------|----------|----------|------|-------|----------|----------|-----------------------------------------|--------------|----------|----------|--------------|--------|--------|------------------|
| chr18 | 43555899 | 43556186 | 288  | -1.49 | 0.000183 | 0.00184  | ENSMUSG0000002450Jakmp2                 | protein_codi | 43531408 | 43687773 | inside       | 131731 | 24491  | shortestDistance |
| chr18 | 43569120 | 43569393 | 274  | -1.14 | 0.00237  | 0.014    | ENSMUSG0000002450Jakmp2                 | protein_codi | 43531408 | 43687773 | inside       | 118517 | 37712  | shortestDistance |
| chr18 | 43597108 | 43597372 | 265  | -1.74 | 5.93E-06 | 0.000106 | ENSMUSG0000002450Jakmp2                 | protein_codi | 43531408 | 43687773 | inside       | 90533  | 65700  | shortestDistance |
| chr18 | 43606979 | 43607330 | 352  | -1.44 | 0.000335 | 0.003    | ENSMUSG0000002450Jakmp2                 | protein_codi | 43531408 | 43687773 | inside       | 80619  | 75751  | shortestDistance |
| chr18 | 43649904 | 43650619 | 716  | -1.28 | 0.00124  | 0.00847  | ENSMUSG0000002450Jakmp2                 | protein_codi | 43531408 | 43687773 | inside       | 37511  | 37154  | shortestDistance |
| chr18 | 43675114 | 43675704 | 591  | -1.11 | 0.0015   | 0.00981  | ENSMUSG0000002450Jakmp2                 | protein_codi | 43531408 | 43687773 | inside       | 12364  | 12069  | shortestDistance |
| chr18 | 43687470 | 43688059 | 590  | -1.2  | 0.000925 | 0.00671  | ENSMUSG0000002450Jakmp2                 | protein_codi | 43531408 | 43687773 | overlapStart | 9      | 286    | shortestDistance |
| chr18 | 43727026 | 43727389 | 364  | -1.81 | 1.06E-06 | 2.46E-05 | ENSMUSG0000002450Spink1                 | protein_codi | 43728069 | 43737237 | downstream   | 10029  | 680    | shortestDistance |
| chr18 | 43734543 | 43734973 | 431  | -1.92 | 5.23E-06 | 9.55E-05 | ENSMUSG0000002450Spink1                 | protein_codi | 43728069 | 43737237 | upstream     | 2479   | 2264   | shortestDistance |
| chr18 | 43836433 | 43836722 | 290  | -1.01 | 0.00543  | 0.0266   | ENSMUSG0000002450Gm94                   | protein_codi | 4377196  | 43792878 | upstream     | -43700 | 43555  | shortestDistance |
| chr18 | 43884709 | 43885192 | 484  | -2.22 | 1.73E-07 | 5.31E-06 | ENSMUSG0000005556Spink5                 | protein_codi | 43963235 | 44022501 | upstream     | -78285 | 78043  | shortestDistance |
| chr18 | 43956657 | 43956895 | 239  | -1.56 | 0.000569 | 0.00458  | ENSMUSG0000005556Spink5                 | protein_codi | 43963235 | 44022501 | upstream     | -6459  | 6340   | shortestDistance |
| chr18 | 43967734 | 43968194 | 461  | -1.68 | 3.47E-06 | 6.74E-05 | ENSMUSG0000005556Spink5                 | protein_codi | 43963235 | 44022501 | inside       | 4729   | 4499   | shortestDistance |
| chr18 | 43977318 | 43977650 | 333  | -1.04 | 0.0114   | 0.0469   | ENSMUSG0000005556Spink5                 | protein_codi | 43963235 | 44022501 | inside       | 14249  | 14083  | shortestDistance |
| chr18 | 43978754 | 43979014 | 261  | -1.32 | 0.00695  | 0.0321   | ENSMUSG0000005556Spink5                 | protein_codi | 43963235 | 44022501 | inside       | 15649  | 15519  | shortestDistance |
| chr18 | 44011181 | 44011516 | 336  | -1.08 | 0.00751  | 0.0341   | ENSMUSG0000005556Spink5                 | protein_codi | 43963235 | 44022501 | inside       | 48113  | 10985  | shortestDistance |
| chr18 | 44031269 | 44031658 | 390  | -3.02 | 1.45E-07 | 4.55E-06 | ENSMUSG0000005105Spink14                | protein_codi | 44027869 | 44032208 | inside       | 3595   | 550    | shortestDistance |
| chr18 | 44041207 | 44041545 | 339  | -1.11 | 0.00612  | 0.0291   | ENSMUSG0000005105Spink14                | protein_codi | 44027869 | 44032208 | downstream   | 13507  | 8999   | shortestDistance |
| chr18 | 44387005 | 44387684 | 680  | -1.5  | 2.19E-06 | 4.54E-05 | ENSMUSG0000002447Dcp2                   | protein_codi | 44380502 | 44424969 | inside       | 6842   | 6503   | shortestDistance |
| chr18 | 44402334 | 44402908 | 575  | -0.91 | 0.00968  | 0.0414   | ENSMUSG0000002447Dcp2                   | protein_codi | 44380502 | 44424969 | inside       | 22119  | 21832  | shortestDistance |
| chr18 | 44580152 | 44580803 | 652  | -1.38 | 2.51E-05 | 0.000357 | ENSMUSG0000007185Mcc                    | protein_codi | 44425060 | 44812182 | inside       | 231704 | 155092 | shortestDistance |
| chr18 | 44580871 | 44581190 | 320  | -1.22 | 0.00433  | 0.0223   | ENSMUSG0000007185Mcc                    | protein_codi | 44425060 | 44812182 | inside       | 231152 | 155811 | shortestDistance |
| chr18 | 44586401 | 44586897 | 497  | -1.32 | 0.000379 | 0.00332  | ENSMUSG0000007185Mcc                    | protein_codi | 44425060 | 44812182 | inside       | 225533 | 161341 | shortestDistance |
| chr18 | 44643691 | 44644112 | 422  | -2.08 | 1.92E-07 | 5.82E-06 | ENSMUSG0000007185Mcc                    | protein_codi | 44425060 | 44812182 | inside       | 168280 | 168070 | shortestDistance |
| chr18 | 44661134 | 44661500 | 367  | -1.32 | 0.000146 | 0.00153  | ENSMUSG0000007185Mcc                    | protein_codi | 44425060 | 44812182 | inside       | 150865 | 150682 | shortestDistance |
| chr18 | 44661508 | 44662772 | 1265 | -1.12 | 0.00138  | 0.00922  | ENSMUSG0000009761A930012181antisense_RI | antisense_RI | 44661665 | 44676271 | overlapStart | 475    | 157    | shortestDistance |
| chr18 | 44724348 | 44724991 | 744  | -1.8  | 8.64E-06 | 0.000146 | ENSMUSG0000007185Mcc                    | protein_codi | 44425060 | 44812182 | inside       | 87512  | 87191  | shortestDistance |
| chr18 | 44765131 | 44766225 | 1095 | -1.38 | 4.74E-05 | 0.000604 | ENSMUSG0000007185Mcc                    | protein_codi | 44425060 | 44812182 | inside       | 46504  | 45957  | shortestDistance |
| chr18 | 44797719 | 44798499 | 781  | -2.13 | 7.37E-09 | 3.59E-07 | ENSMUSG0000007185Mcc                    | protein_codi | 44425060 | 44812182 | inside       | 14073  | 13683  | shortestDistance |
| chr18 | 44811862 | 44812549 | 688  | -1.25 | 0.000419 | 0.00359  | ENSMUSG0000007185Mcc                    | protein_codi | 44425060 | 44812182 | overlapStart | -24    | 320    | shortestDistance |
| chr18 | 44827720 | 44828005 | 286  | -0.89 | 0.00653  | 0.0306   | ENSMUSG0000003465Ythcd2                 | protein_codi | 44827746 | 44889724 | overlapStart | 116    | 26     | shortestDistance |
| chr18 | 44842076 | 44842416 | 341  | -2.24 | 2.87E-05 | 0.000399 | ENSMUSG0000003465Ythcd2                 | protein_codi | 44827746 | 44889724 | inside       | 14500  | 14330  | shortestDistance |
| chr18 | 44931163 | 44931653 | 491  | -1.09 | 0.00219  | 0.0132   | ENSMUSG0000003465Ythcd2                 | protein_codi | 44827746 | 44889724 | downstream   | 103662 | 41439  | shortestDistance |
| chr18 | 45375297 | 45375613 | 317  | -1.38 | 0.000328 | 0.00295  | ENSMUSG0000005447Kcnm2                  | protein_codi | 45268860 | 45686024 | inside       | 106595 | 106437 | shortestDistance |
| chr18 | 45476877 | 45477339 | 463  | -2.41 | 1.18E-09 | 7.45E-08 | ENSMUSG0000005447Kcnm2                  | protein_codi | 45268860 | 45686024 | inside       | 208248 | 208017 | shortestDistance |
| chr18 | 45558403 | 45558733 | 331  | -1.17 | 0.00229  | 0.0137   | ENSMUSG0000005447Kcnm2                  | protein_codi | 45268860 | 45686024 | inside       | 289708 | 127291 | shortestDistance |
| chr18 | 45778341 | 45778829 | 489  | -1.87 | 9.62E-05 | 0.00108  | ENSMUSG0000009828A330093E20antisense_RI | antisense_RI | 45683487 | 45896509 | inside       | 117924 | 94854  | shortestDistance |
| chr18 | 45800611 | 45800937 | 327  | -2.68 | 3.68E-08 | 1.43E-06 | ENSMUSG0000009828A330093E20antisense_RI | antisense_RI | 45683487 | 45896509 | inside       | 95735  | 95572  | shortestDistance |
| chr18 | 45912241 | 45912749 | 509  | -2.15 | 1.97E-06 | 4.16E-05 | ENSMUSG0000009828A330093E20antisense_RI | antisense_RI | 45683487 | 45896509 | upstream     | -15986 | 15732  | shortestDistance |
| chr18 | 46068277 | 46068707 | 431  | -1.14 | 0.00198  | 0.0122   | ENSMUSG0000010400Gm38337                | TEC          | 46112661 | 46113259 | downstream   | 44767  | 43954  | shortestDistance |
| chr18 | 46092046 | 46093306 | 1261 | -0.9  | 0.00282  | 0.016    | ENSMUSG0000010400Gm38337                | TEC          | 46112661 | 46113259 | downstream   | 20583  | 19355  | shortestDistance |
| chr18 | 46139036 | 46139375 | 340  | -1.29 | 0.000636 | 0.00499  | ENSMUSG0000010400Gm38337                | TEC          | 46112661 | 46113259 | upstream     | -25947 | 25777  | shortestDistance |
| chr18 | 46200939 | 46201210 | 272  | -1.15 | 0.000991 | 0.00708  | ENSMUSG0000003394Trim36                 | protein_codi | 46165302 | 46212607 | inside       | 11533  | 11397  | shortestDistance |
| chr18 | 46211801 | 46212962 | 1162 | -1.09 | 0.000911 | 0.00662  | ENSMUSG0000003394Trim36                 | protein_codi | 46165302 | 46212607 | overlapStart | 225    | 355    | shortestDistance |
| chr18 | 46250251 | 46250744 | 494  | -1.53 | 7.09E-05 | 0.000841 | ENSMUSG0000002447Pgg1b                  | protein_codi | 46239949 | 46280850 | inside       | 30352  | 10302  | shortestDistance |
| chr18 | 46267334 | 46267617 | 284  | -0.97 | 0.0104   | 0.0439   | ENSMUSG0000002447Pgg1b                  | protein_codi | 46239949 | 46280850 | inside       | 13374  | 13233  | shortestDistance |
| chr18 | 46280282 | 46281209 | 928  | -0.93 | 0.00268  | 0.0154   | ENSMUSG0000002447Pgg1b                  | protein_codi | 46239949 | 46280850 | overlapStart | 104    | 359    | shortestDistance |
| chr18 | 46298447 | 46299028 | 582  | -0.87 | 0.0122   | 0.0494   | ENSMUSG0000007185Cdc12                  | protein_codi | 46282151 | 46311928 | inside       | 13190  | 12900  | shortestDistance |
| chr18 | 46380762 | 46381475 | 714  | -1.59 | 0.000146 | 0.00153  | ENSMUSG00000009554Gm24617               | miRNA        | 46367365 | 46367485 | downstream   | 13753  | 13277  | shortestDistance |
| chr18 | 46447526 | 46448014 | 489  | 1.61  | 1.66E-05 | 0.000253 | ENSMUSG0000004648Mospd4                 | processed_g  | 46465215 | 46465790 | downstream   | 18020  | 17201  | shortestDistance |
| chr18 | 46457798 | 46458738 | 941  | 2.55  | 7.55E-11 | 7.29E-09 | ENSMUSG0000004648Mospd4                 | processed_g  | 46465215 | 46465790 | downstream   | 7522   | 6477   | shortestDistance |
| chr18 | 46474749 | 46475117 | 369  | 1.93  | 3.01E-05 | 0.000415 | ENSMUSG0000008880Gm24076                | snRNA        | 46473931 | 46474024 | upstream     | -909   | 725    | shortestDistance |
| chr18 | 46493157 | 46493618 | 462  | -0.87 | 0.0123   | 0.0497   | ENSMUSG0000003391Fem1c                  | protein_codi | 46501746 | 46525971 | downstream   | 32583  | 8128   | shortestDistance |
| chr18 | 46553117 | 46553436 | 320  | -1.17 | 0.00335  | 0.0183   | ENSMUSG0000005613Ticam2                 | protein_codi | 46559155 | 46574533 | downstream   | 21257  | 5719   | shortestDistance |
| chr18 | 46553491 | 46554354 | 864  | -1.52 | 6.28E-05 | 0.000765 | ENSMUSG0000005613Ticam2                 | protein_codi | 46559155 | 46574533 | downstream   | 20611  | 4801   | shortestDistance |
| chr18 | 46604296 | 46604673 | 378  | 1.9   | 1.43E-05 | 0.000223 | ENSMUSG0000005756Eif1a                  | protein_codi | 46597704 | 46610225 | inside       | 6780   | 5552   | shortestDistance |
| chr18 | 46612141 | 46612444 | 304  | 1.28  | 0.00138  | 0.0092   | ENSMUSG0000005756Eif1a                  | protein_codi | 46597704 | 46610225 | downstream   | 14588  | 1916   | shortestDistance |
| chr18 | 46727628 | 46728713 | 1086 | -1.51 | 7.41E-06 | 0.000128 | ENSMUSG0000003302Cdo1                   | protein_codi | 46713205 | 46728342 | overlapStart | 172    | 371    | shortestDistance |
| chr18 | 46745470 | 46746230 | 761  | 1.36  | 0.000115 | 0.00125  | ENSMUSG0000002448Ap3s1                  | protein_codi | 46741876 | 46790826 | downstream   | 3974   | 3594   | shortestDistance |
| chr18 | 46798362 | 46798926 | 565  | -0.89 | 0.00841  | 0.0372   | ENSMUSG0000002448Ap3s1                  | protein_codi | 46741876 | 46790826 | downstream   | 56768  | 7536   | shortestDistance |
| chr18 | 46849175 | 46850486 | 1312 | -1.26 | 0.00147  | 0.00965  | ENSMUSG0000002448Lvrn                   | protein_codi | 46850039 | 46905446 | overlapStart | -209   | 447    | shortestDistance |
| chr18 | 46883873 | 46884423 | 551  | -1.23 | 0.00155  | 0.0101   | ENSMUSG0000002448Lvrn                   | protein_codi | 46850039 | 46905446 | inside       | 34109  | 21023  | shortestDistance |
| chr18 | 46958462 | 46959631 | 1170 | -0.88 | 0.00302  | 0.0169   | ENSMUSG0000004270Commd10                | protein_codi | 46958862 | 47087992 | overlapStart | 184    | 400    | shortestDistance |
| chr18 | 47031310 | 47031590 | 281  | -2.88 | 1.05E-05 | 0.000172 | ENSMUSG0000004270Commd10                | protein_codi | 46958862 | 47087992 | inside       | 72588  | 56402  | shortestDistance |
| chr18 | 47148720 | 47150112 | 1393 | -2.06 | 1.15E-05 | 0.000186 | ENSMUSG0000009315Gm25036                | miRNA        | 47154373 | 47154422 | upstream     | -4957  | 4261   | shortestDistance |
| chr18 | 47154771 | 47155069 | 299  | -1.49 | 0.00228  | 0.0136   | ENSMUSG0000009315Gm25036                | miRNA        | 47154373 | 47154422 | downstream   | 547    | 349    | shortestDistance |
| chr18 | 47177242 | 47177677 | 436  | -2.48 | 1.17E-06 | 2.67E-05 | ENSMUSG0000009315Gm25036                | miRNA        | 47154373 | 47154422 | downstream   | 23087  | 22820  | shortestDistance |
| chr18 | 47179797 | 47180502 | 706  | -1.2  | 0.00109  | 0.00763  | ENSMUSG0000009315Gm25036                | miRNA        | 47154373 | 47154422 | downstream   | 25777  | 25375  | shortestDistance |
| chr18 | 47255810 | 47256860 | 1051 | -1.04 | 0.00159  | 0.0103   | ENSMUSG0000001964Sema6a                 | protein_codi | 47235598 | 47368870 | inside       | 112535 | 20212  | shortestDistance |
| chr18 | 47276556 | 47277058 | 503  | 1.21  | 0.00214  | 0.013    | ENSMUSG0000001964Sema6a                 | protein_codi | 47235598 | 47368870 | inside       | 92063  | 40958  | shortestDistance |
| chr18 | 47290076 | 47290648 | 573  | -1.69 | 0.000149 | 0.00155  | ENSMUSG0000001964Sema6a                 | protein_codi | 47235598 | 47368870 | inside       | 78508  | 54478  | shortestDistance |
| chr18 | 47318678 | 47319180 | 503  | -1.61 | 0.00265  | 0.00248  | ENSMUSG0000001964Sema6a                 | protein_codi | 47235598 | 47368870 | inside       | 49941  | 49690  | shortestDistance |
| chr18 |          |          |      |       |          |          |                                         |              |          |          |              |        |        |                  |

|       |           |          |      |       |          |          |                              |                    |          |          |              |         |        |                  |
|-------|-----------|----------|------|-------|----------|----------|------------------------------|--------------------|----------|----------|--------------|---------|--------|------------------|
| chr18 | 52243923  | 52244379 | 457  | -1.38 | 0.00044  | 0.00373  | ENSMUSG0000002451Ftmt        | protein_codi       | 52331536 | 52332986 | upstream     | -87385  | 87157  | shortestDistance |
| chr18 | 52244875  | 52245214 | 340  | -1.51 | 0.000787 | 0.0059   | ENSMUSG0000002451Ftmt        | protein_codi       | 52331536 | 52332986 | upstream     | -86492  | 86322  | shortestDistance |
| chr18 | 52280351  | 52280881 | 531  | -1.75 | 3.82E-05 | 0.000506 | ENSMUSG0000002451Ftmt        | protein_codi       | 52331536 | 52332986 | upstream     | -50920  | 50655  | shortestDistance |
| chr18 | 52372887  | 52373368 | 482  | -1.07 | 0.00279  | 0.0159   | ENSMUSG0000002451Ftmt        | protein_codi       | 52331536 | 52332986 | downstream   | 41592   | 39901  | shortestDistance |
| chr18 | 52485613  | 52486346 | 734  | -1.97 | 7.82E-06 | 0.000134 | ENSMUSG0000002452Srfbp1      | protein_codi       | 52465693 | 52490738 | inside       | 20287   | 4392   | shortestDistance |
| chr18 | 52567123  | 52567735 | 523  | 1.92  | 9.63E-06 | 0.00016  | ENSMUSG0000002452Lox         | protein_codi       | 52516069 | 52529867 | upstream     | -37607  | 37346  | shortestDistance |
| chr18 | 52668216  | 52668460 | 245  | 1.58  | 0.0108   | 0.0449   | ENSMUSG00000024531700034E13  | protein_codi       | 52646209 | 52663733 | downstream   | 22129   | 4483   | shortestDistance |
| chr18 | 53148966  | 53150142 | 1177 | 1.61  | 1.15E-05 | 0.000187 | ENSMUSG0000003448Snx2        | protein_codi       | 53176365 | 53220860 | upstream     | -26811  | 26223  | shortestDistance |
| chr18 | 53158632  | 53159011 | 380  | 1.22  | 0.00111  | 0.00772  | ENSMUSG0000003448Snx2        | protein_codi       | 53176365 | 53220860 | upstream     | -17543  | 17354  | shortestDistance |
| chr18 | 53246982  | 53247345 | 364  | 1.1   | 0.00205  | 0.0125   | ENSMUSG0000002453Snx24       | protein_codi       | 53245662 | 53390823 | inside       | 1502    | 1320   | shortestDistance |
| chr18 | 53255348  | 53255728 | 381  | 1.67  | 0.000203 | 0.002    | ENSMUSG0000002453Snx24       | protein_codi       | 53245662 | 53390823 | inside       | 9876    | 9686   | shortestDistance |
| chr18 | 53264172  | 53264543 | 372  | 1.04  | 0.00293  | 0.0165   | ENSMUSG0000002453Snx24       | protein_codi       | 53245662 | 53390823 | inside       | 18696   | 18510  | shortestDistance |
| chr18 | 53264849  | 53265347 | 499  | 2.12  | 2.45E-10 | 1.96E-08 | ENSMUSG0000002453Snx24       | protein_codi       | 53245662 | 53390823 | inside       | 19436   | 19187  | shortestDistance |
| chr18 | 53267488  | 53268061 | 574  | 0.98  | 0.0033   | 0.0181   | ENSMUSG0000002453Snx24       | protein_codi       | 53245662 | 53390823 | inside       | 22112   | 21826  | shortestDistance |
| chr18 | 53346841  | 53347151 | 311  | -2.36 | 1.36E-05 | 0.000214 | ENSMUSG0000002453Snx24       | protein_codi       | 53245662 | 53390823 | inside       | 101334  | 43672  | shortestDistance |
| chr18 | 53490623  | 53490868 | 246  | 1.62  | 0.00156  | 0.0101   | ENSMUSG0000006937Pdm6        | protein_codi       | 53464546 | 53575907 | inside       | 26200   | 26077  | shortestDistance |
| chr18 | 53670982  | 53671359 | 378  | 1.83  | 7.39E-06 | 0.000128 | ENSMUSG0000004879Cep120      | protein_codi       | 53681724 | 53744547 | downstream   | 73377   | 10365  | shortestDistance |
| chr18 | 53672018  | 53672340 | 323  | 1.69  | 0.000289 | 0.00266  | ENSMUSG0000004879Cep120      | protein_codi       | 53681724 | 53744547 | downstream   | 72368   | 9384   | shortestDistance |
| chr18 | 53877201  | 53877907 | 707  | 1.31  | 0.000846 | 0.00625  | ENSMUSG0000007356Csnk1g3     | protein_codi       | 53862131 | 53955684 | inside       | 15441   | 15088  | shortestDistance |
| chr18 | 54023304  | 54023559 | 256  | -2.04 | 0.000162 | 0.00166  | ENSMUSG0000006937Gm5507      | processed_p        | 53984321 | 53985328 | downstream   | 39111   | 37976  | shortestDistance |
| chr18 | 54294634  | 54295127 | 494  | 1.18  | 0.00114  | 0.00789  | ENSMUSG0000009698Redrum      | lincRNA            | 54422295 | 54452840 | upstream     | -127415 | 127168 | shortestDistance |
| chr18 | 54838878  | 54839448 | 571  | 1.07  | 0.00327  | 0.018    | ENSMUSG00000005271Zfp608     | protein_codi       | 54888045 | 54990180 | downstream   | 151017  | 48597  | shortestDistance |
| chr18 | 54899967  | 54900717 | 751  | 1.05  | 0.00116  | 0.00803  | ENSMUSG00000005271Zfp608     | protein_codi       | 54888045 | 54990180 | inside       | 89638   | 11922  | shortestDistance |
| chr18 | 54906595  | 54907039 | 445  | 1.17  | 0.000302 | 0.00276  | ENSMUSG00000005271Zfp608     | protein_codi       | 54888045 | 54990180 | inside       | 83363   | 18550  | shortestDistance |
| chr18 | 54908001  | 54908245 | 245  | 2.15  | 3.78E-07 | 1.02E-05 | ENSMUSG00000005271Zfp608     | protein_codi       | 54888045 | 54990180 | inside       | 82057   | 19956  | shortestDistance |
| chr18 | 54937676  | 54938245 | 570  | 2.1   | 3.37E-08 | 1.33E-06 | ENSMUSG00000005271Zfp608     | protein_codi       | 54888045 | 54990180 | inside       | 52220   | 49631  | shortestDistance |
| chr18 | 54969903  | 54970264 | 362  | 2.16  | 7.72E-07 | 1.89E-05 | ENSMUSG00000005271Zfp608     | protein_codi       | 54888045 | 54990180 | inside       | 20096   | 19916  | shortestDistance |
| chr18 | 54970722  | 54971183 | 462  | 1.98  | 3.17E-08 | 1.26E-06 | ENSMUSG00000005271Zfp608     | protein_codi       | 54888045 | 54990180 | inside       | 19228   | 18997  | shortestDistance |
| chr18 | 54971269  | 54971687 | 419  | 1.52  | 6.82E-05 | 0.000816 | ENSMUSG00000005271Zfp608     | protein_codi       | 54888045 | 54990180 | inside       | 18702   | 18493  | shortestDistance |
| chr18 | 54978610  | 54979167 | 558  | 0.96  | 0.00662  | 0.031    | ENSMUSG00000005271Zfp608     | protein_codi       | 54888045 | 54990180 | inside       | 11292   | 11013  | shortestDistance |
| chr18 | 54991909  | 54992348 | 440  | 0.88  | 0.0103   | 0.0433   | ENSMUSG0000009694Gm4221      | lincRNA            | 54990310 | 55079414 | inside       | 1818    | 1599   | shortestDistance |
| chr18 | 55050467  | 55051080 | 614  | 1.12  | 0.00203  | 0.0124   | ENSMUSG0000009694Gm4221      | lincRNA            | 54990310 | 55079414 | inside       | 60464   | 28334  | shortestDistance |
| chr18 | 55087517  | 55088093 | 577  | 1.39  | 0.00504  | 0.025    | ENSMUSG00000008452Gm24183    | snRNA              | 55085565 | 55085657 | upstream     | -2148   | 1860   | shortestDistance |
| chr18 | 55238274  | 55238604 | 331  | 1.72  | 0.00126  | 0.00855  | ENSMUSG0000000822Gm22597     | snRNA              | 55179840 | 55179919 | downstream   | 58599   | 58355  | shortestDistance |
| chr18 | 55389587  | 55390097 | 511  | 2.07  | 4.24E-07 | 1.14E-05 | ENSMUSG0000010445Gm37828     | TEC                | 55339512 | 55339943 | downstream   | 50330   | 49644  | shortestDistance |
| chr18 | 55391654  | 55391895 | 242  | 2.17  | 0.000116 | 0.00126  | ENSMUSG0000010445Gm37828     | TEC                | 55339512 | 55339943 | downstream   | 52262   | 51711  | shortestDistance |
| chr18 | 55409119  | 55409794 | 676  | 2.24  | 1.74E-09 | 1.04E-07 | ENSMUSG0000010445Gm37828     | TEC                | 55339512 | 55339943 | downstream   | 69944   | 69176  | shortestDistance |
| chr18 | 56067775  | 56068316 | 542  | -0.96 | 0.00683  | 0.0317   | ENSMUSG00000008861Gm22484    | misc_RNA           | 55987222 | 55987527 | upstream     | -80519  | 80248  | shortestDistance |
| chr18 | 56070148  | 56070810 | 663  | 1.19  | 1.62E-05 | 0.000248 | ENSMUSG00000008861Gm22484    | misc_RNA           | 55987222 | 55987527 | upstream     | -82952  | 82621  | shortestDistance |
| chr18 | 56407299  | 56407742 | 444  | 1.27  | 0.000381 | 0.00333  | ENSMUSG0000000170Gramd3      | protein_codi       | 56432132 | 56503792 | upstream     | -24612  | 24390  | shortestDistance |
| chr18 | 56409273  | 56409618 | 346  | 1.03  | 0.00204  | 0.0125   | ENSMUSG0000000170Gramd3      | protein_codi       | 56432132 | 56503792 | upstream     | -22686  | 22514  | shortestDistance |
| chr18 | 56411789  | 56412008 | 220  | 1.16  | 0.00322  | 0.0178   | ENSMUSG0000000170Gramd3      | protein_codi       | 56432132 | 56503792 | upstream     | -20234  | 20124  | shortestDistance |
| chr18 | 56432883  | 56433445 | 563  | 1.34  | 0.000171 | 0.00173  | ENSMUSG0000000170Gramd3      | protein_codi       | 56432132 | 56503792 | inside       | 1032    | 751    | shortestDistance |
| chr18 | 56439766  | 56440054 | 289  | 2.41  | 7.38E-06 | 0.000128 | ENSMUSG0000000170Gramd3      | protein_codi       | 56432132 | 56503792 | inside       | 7778    | 7634   | shortestDistance |
| chr18 | 56509243  | 56509989 | 747  | 1.46  | 0.000189 | 0.00189  | ENSMUSG00000005364Aldh7a1    | protein_codi       | 56509687 | 56572951 | overlapEnd   | 63335   | 302    | shortestDistance |
| chr18 | 56675433  | 56675785 | 353  | 1.38  | 0.0026   | 0.0151   | ENSMUSG00000002459Lmnb1      | protein_codi       | 56707813 | 56753424 | upstream     | -32204  | 32028  | shortestDistance |
| chr18 | 56688467  | 56688850 | 384  | 1.51  | 0.000393 | 0.00342  | ENSMUSG00000002459Lmnb1      | protein_codi       | 56707813 | 56753424 | upstream     | -19155  | 18963  | shortestDistance |
| chr18 | 56698999  | 56699416 | 418  | 1.68  | 8.95E-05 | 0.00101  | ENSMUSG00000002459Lmnb1      | protein_codi       | 56707813 | 56753424 | upstream     | -8605   | 8397   | shortestDistance |
| chr18 | 56732949  | 56733318 | 370  | 0.99  | 0.00514  | 0.0254   | ENSMUSG00000002459Lmnb1      | protein_codi       | 56707813 | 56753424 | inside       | 25321   | 20106  | shortestDistance |
| chr18 | 56733819  | 56734125 | 307  | 1.68  | 9.35E-05 | 0.00105  | ENSMUSG00000002459Lmnb1      | protein_codi       | 56707813 | 56753424 | inside       | 26159   | 19299  | shortestDistance |
| chr18 | 56932376  | 56933222 | 487  | 1.02  | 0.00938  | 0.0404   | ENSMUSG00000003265           | 3-Mar protein_codi | 56761716 | 56925548 | upstream     | -7431   | 7188   | shortestDistance |
| chr18 | 56933668  | 56933996 | 329  | 2.29  | 5.21E-07 | 1.35E-05 | ENSMUSG00000003265           | 3-Mar protein_codi | 56761716 | 56925548 | upstream     | -8284   | 8120   | shortestDistance |
| chr18 | 56934455  | 56934801 | 347  | 2.07  | 6.84E-06 | 0.00012  | ENSMUSG00000003265           | 3-Mar protein_codi | 56761716 | 56925548 | upstream     | -9080   | 8907   | shortestDistance |
| chr18 | 57244438  | 57245139 | 702  | 2.14  | 3.19E-08 | 1.26E-06 | ENSMUSG00000002459Megf10     | protein_codi       | 57133090 | 57297467 | inside       | 111698  | 52328  | shortestDistance |
| chr18 | 57245217  | 57245575 | 359  | 1.57  | 0.00173  | 0.011    | ENSMUSG00000002459Megf10     | protein_codi       | 57133090 | 57297467 | inside       | 112306  | 51892  | shortestDistance |
| chr18 | 57454973  | 57455240 | 268  | 3.22  | 1.13E-07 | 3.69E-06 | ENSMUSG000000086604930511M06 | processed_tr       | 57373455 | 57552397 | inside       | 97291   | 81518  | shortestDistance |
| chr18 | 57636494  | 57637028 | 535  | -2.3  | 4.05E-11 | 4.29E-09 | ENSMUSG00000005892170001103R | protein_codi       | 57533780 | 57731065 | inside       | 102981  | 94037  | shortestDistance |
| chr18 | 57638579  | 57638895 | 317  | -1.51 | 0.000459 | 0.00386  | ENSMUSG00000005892170001103R | protein_codi       | 57533780 | 57731065 | inside       | 104957  | 92170  | shortestDistance |
| chr18 | 577119493 | 57719730 | 238  | -1.36 | 0.00497  | 0.0248   | ENSMUSG00000005892170001103R | protein_codi       | 57533780 | 57731065 | inside       | 185832  | 11335  | shortestDistance |
| chr18 | 57740142  | 57740604 | 463  | 2.14  | 8.88E-08 | 3.01E-06 | ENSMUSG00000005892170001103R | protein_codi       | 57533780 | 57731065 | downstream   | 206593  | 9077   | shortestDistance |
| chr18 | 58078001  | 58078371 | 371  | -1.6  | 0.00032  | 0.00289  | ENSMUSG00000002459Fbn2       | protein_codi       | 58008623 | 58209926 | inside       | 131740  | 69378  | shortestDistance |
| chr18 | 58121535  | 58122158 | 624  | -1.11 | 0.00126  | 0.00854  | ENSMUSG00000002459Fbn2       | protein_codi       | 58008623 | 58209926 | inside       | 88080   | 87768  | shortestDistance |
| chr18 | 58555478  | 58557218 | 1741 | -0.97 | 0.00562  | 0.0273   | ENSMUSG00000002460Sic27a6    | protein_codi       | 58556257 | 58612773 | overlapStart | 91      | 779    | shortestDistance |
| chr18 | 58560859  | 58561360 | 502  | -1.67 | 3.67E-06 | 7.06E-05 | ENSMUSG00000002460Sic27a6    | protein_codi       | 58556257 | 58612773 | inside       | 4853    | 4602   | shortestDistance |
| chr18 | 58570911  | 58571450 | 540  | -1.64 | 2.08E-05 | 0.000306 | ENSMUSG00000002460Sic27a6    | protein_codi       | 58556257 | 58612773 | inside       | 14923   | 14654  | shortestDistance |
| chr18 | 58599983  | 58600259 | 277  | 2.73  | 6.35E-07 | 1.60E-05 | ENSMUSG00000002460Sic27a6    | protein_codi       | 58556257 | 58612773 | inside       | 43864   | 12514  | shortestDistance |
| chr18 | 59109775  | 59110123 | 349  | -2    | 1.32E-06 | 2.94E-05 | ENSMUSG00000005987A730017C20 | protein_codi       | 59062248 | 59076962 | downstream   | 47701   | 32813  | shortestDistance |
| chr18 | 59565712  | 59566039 | 328  | -1.4  | 0.000807 | 0.00602  | ENSMUSG00000009828Mir6355    | miRNA              | 59579630 | 59579735 | upstream     | -13754  | 13591  | shortestDistance |
| chr18 | 59866180  | 59866530 | 351  | -1.65 | 0.00107  | 0.00752  | ENSMUSG00000008928Gm26028    | misc_RNA           | 59738064 | 59738357 | upstream     | -127998 | 127823 | shortestDistance |
| chr18 | 60118541  | 60118911 | 371  | -1.75 | 0.000131 | 0.00139  | ENSMUSG00000009496Gm23576    | miRNA              | 60174317 | 60174426 | upstream     | -55591  | 55406  | shortestDistance |
| chr18 | 60143156  | 60143633 | 478  | -1.28 | 0.00022  | 0.0134   | ENSMUSG00000009496Gm23576    | miRNA              | 60174317 | 60174426 | upstream     | -30923  | 30684  | shortestDistance |
| chr18 | 60211857  | 60212143 | 287  | -1.22 | 0.0033   |          |                              |                    |          |          |              |         |        |                  |



|       |          |          |      |       |          |          |                                    |              |          |            |              |         |                  |                  |
|-------|----------|----------|------|-------|----------|----------|------------------------------------|--------------|----------|------------|--------------|---------|------------------|------------------|
| chr18 | 77938046 | 77938784 | 739  | 0.86  | 0.00515  | 0.0255   | ENSMUSG0000003984Epg5              | protein_codi | 77938467 | 78035027   | overlapStart | -52     | 317              | shortestDistance |
| chr18 | 78161420 | 78161728 | 309  | 1.3   | 0.00172  | 0.011    | ENSMUSG0000002455Slc14a2           | protein_codi | 78146940 | 78209094   | inside       | 47520   | 14480            | shortestDistance |
| chr18 | 79234326 | 79234684 | 359  | 1.43  | 0.00372  | 0.0198   | ENSMUSG0000002454Setbp1            | protein_codi | 78750380 | 79109391   | upstream     | -125114 | 124935           | shortestDistance |
| chr18 | 79258937 | 79259260 | 324  | 1.21  | 0.000364 | 0.00321  | ENSMUSG0000002454Setbp1            | protein_codi | 78750380 | 79109391   | upstream     | -149707 | 149546           | shortestDistance |
| chr18 | 79271463 | 79271763 | 301  | 1.24  | 0.00813  | 0.0363   | ENSMUSG0000002454Setbp1            | protein_codi | 78750380 | 79109391   | upstream     | -162222 | 162072           | shortestDistance |
| chr18 | 79284020 | 79284369 | 350  | 2.5   | 1.54E-05 | 0.000237 | ENSMUSG0000002454Setbp1            | protein_codi | 78750380 | 79109391   | upstream     | -174803 | 174629           | shortestDistance |
| chr18 | 79294710 | 79295166 | 457  | 3.23  | 4.02E-16 | 3.04E-13 | ENSMUSG0000002454Setbp1            | protein_codi | 78750380 | 79109391   | upstream     | -185547 | 185319           | shortestDistance |
| chr18 | 79315408 | 79315953 | 546  | 2.54  | 1.25E-08 | 5.68E-07 | ENSMUSG0000002454Setbp1            | protein_codi | 78750380 | 79109391   | upstream     | -206289 | 206017           | shortestDistance |
| chr18 | 79327264 | 79327986 | 723  | 0.89  | 0.00373  | 0.0199   | ENSMUSG0000002454Setbp1            | protein_codi | 78750380 | 79109391   | upstream     | -218234 | 218773           | shortestDistance |
| chr18 | 79330123 | 79330626 | 504  | 1.23  | 0.000211 | 0.00206  | ENSMUSG0000002454Setbp1            | protein_codi | 78750380 | 79109391   | upstream     | -220983 | 220732           | shortestDistance |
| chr18 | 79993200 | 79993807 | 608  | 1.15  | 0.0044   | 0.0226   | ENSMUSG0000005621Pard6g            | protein_codi | 80046895 | 80119640   | upstream     | -53391  | 53088            | shortestDistance |
| chr18 | 80118899 | 80119253 | 355  | 1.18  | 0.00831  | 0.0369   | ENSMUSG0000005621Pard6g            | protein_codi | 80046895 | 80119640   | inside       | 72181   | 387              | shortestDistance |
| chr18 | 80138120 | 80139212 | 1093 | 2.18  | 6.23E-09 | 3.10E-07 | ENSMUSG0000005395Ardp2             | protein_codi | 80126311 | 80151482   | inside       | 12816   | 11809            | shortestDistance |
| chr18 | 80151275 | 80152096 | 822  | 0.83  | 0.00525  | 0.0259   | ENSMUSG0000005395Ardp2             | protein_codi | 80126311 | 80151482   | overlapStart | -204    | 207              | shortestDistance |
| chr18 | 80163851 | 80164065 | 215  | 2.09  | 0.00121  | 0.00828  | ENSMUSG0000005395Ardp2             | protein_codi | 80126311 | 80151482   | upstream     | -12476  | 12369            | shortestDistance |
| chr18 | 80169076 | 80169759 | 684  | 1.22  | 0.000422 | 0.00361  | ENSMUSG0000005395Ardp2             | protein_codi | 80126311 | 80151482   | upstream     | -17936  | 17594            | shortestDistance |
| chr18 | 80169886 | 80170278 | 393  | 1.23  | 0.000172 | 0.00175  | ENSMUSG0000005395Ardp2             | protein_codi | 80126311 | 80151482   | upstream     | -18600  | 18404            | shortestDistance |
| chr18 | 80178218 | 80179024 | 807  | 1.39  | 8.77E-05 | 0.000998 | ENSMUSG0000002457Rbfa              | protein_codi | 80192265 | 80200658   | downstream   | 22037   | 13241            | shortestDistance |
| chr18 | 80196186 | 80196717 | 532  | 0.91  | 0.00408  | 0.0213   | ENSMUSG0000002457Rbfa              | protein_codi | 80192265 | 80200658   | inside       | 4206    | 3921             | shortestDistance |
| chr18 | 80200336 | 80201076 | 741  | 0.85  | 0.0107   | 0.0446   | ENSMUSG0000002457Rbfa              | protein_codi | 80192265 | 80200658   | overlapStart | -48     | 322              | shortestDistance |
| chr18 | 80206363 | 80207458 | 1096 | 0.87  | 0.00358  | 0.0192   | ENSMUSG0000002457Gm16286           | protein_codi | 80206765 | 80212741   | overlapStart | 145     | 402              | shortestDistance |
| chr18 | 80224261 | 80225215 | 955  | 1.39  | 0.000262 | 0.00246  | ENSMUSG0000005713Tnfr4a            | protein_codi | 80206795 | 80223533   | downstream   | 17943   | 728              | shortestDistance |
| chr18 | 80319106 | 80319598 | 493  | 0.95  | 0.00506  | 0.0251   | ENSMUSG0000005985Kcng2             | protein_codi | 80294546 | 80364254   | inside       | 44902   | 24560            | shortestDistance |
| chr18 | 80390498 | 80391257 | 760  | 1.23  | 0.00559  | 0.0272   | ENSMUSG0000003332Ctdp1             | protein_codi | 80407959 | 80469695   | downstream   | 78817   | 16702            | shortestDistance |
| chr18 | 80469164 | 80470679 | 1516 | 0.91  | 0.00428  | 0.0221   | ENSMUSG0000003332Ctdp1             | protein_codi | 80407959 | 80469695   | overlapStart | -227    | 531              | shortestDistance |
| chr18 | 80490609 | 80490992 | 384  | 1.05  | 0.00332  | 0.0181   | ENSMUSG0000003332Ctdp1             | protein_codi | 80407959 | 80469695   | upstream     | -21105  | 20914            | shortestDistance |
| chr18 | 80496765 | 80497549 | 785  | 1.4   | 0.000127 | 0.00136  | ENSMUSG0000003332Ctdp1             | protein_codi | 80407959 | 80469695   | upstream     | -27462  | 27070            | shortestDistance |
| chr18 | 80524615 | 80525123 | 509  | 1.31  | 0.00293  | 0.0165   | ENSMUSG0000003332Ctdp1             | protein_codi | 80407959 | 80469695   | upstream     | -55174  | 54920            | shortestDistance |
| chr18 | 80550483 | 80550767 | 285  | 2.39  | 8.92E-07 | 2.13E-05 | ENSMUSG0000003331Nfatc1            | protein_codi | 80606205 | 80713071   | downstream   | 162446  | 5438             | shortestDistance |
| chr18 | 80640300 | 80640648 | 349  | 1.18  | 0.0113   | 0.0466   | ENSMUSG0000003301Nfatc1            | protein_codi | 80606205 | 80713071   | inside       | 72597   | 34095            | shortestDistance |
| chr18 | 80689854 | 80690177 | 324  | 1.01  | 0.00695  | 0.0321   | ENSMUSG0000003301Nfatc1            | protein_codi | 80606205 | 80713071   | inside       | 23055   | 22894            | shortestDistance |
| chr18 | 80702400 | 80702955 | 556  | 1.06  | 0.000921 | 0.00668  | ENSMUSG0000003301Nfatc1            | protein_codi | 80606205 | 80713071   | inside       | 10393   | 10116            | shortestDistance |
| chr18 | 80715202 | 80715746 | 545  | 1.05  | 0.00413  | 0.0215   | ENSMUSG0000003301Nfatc1            | protein_codi | 80606205 | 80713071   | upstream     | -2403   | 2131             | shortestDistance |
| chr18 | 80729340 | 80729649 | 310  | 1.24  | 0.00244  | 0.0143   | ENSMUSG0000002456Atg9b             | protein_codi | 80734141 | 80934058   | downstream   | 204564  | 4492             | shortestDistance |
| chr18 | 80738117 | 80739310 | 1194 | 2.29  | 5.01E-12 | 7.30E-10 | ENSMUSG0000002456Atg9b             | protein_codi | 80734141 | 80934058   | inside       | 195344  | 3976             | shortestDistance |
| chr18 | 80933370 | 80934279 | 910  | 0.91  | 0.00398  | 0.0209   | ENSMUSG0000002456Atg9b             | protein_codi | 80734141 | 80934058   | overlapStart | 234     | 221              | shortestDistance |
| chr18 | 80984080 | 80984350 | 271  | 1.4   | 0.000256 | 0.00241  | ENSMUSG0000002456Sall3             | protein_codi | 80966376 | 80986578   | inside       | 2363    | 2228             | shortestDistance |
| chr18 | 80986513 | 80986958 | 446  | 1.72  | 5.66E-06 | 0.000102 | ENSMUSG0000002456Sall3             | protein_codi | 80966376 | 80986578   | overlapStart | -158    | 65               | shortestDistance |
| chr18 | 81021361 | 81021823 | 463  | 2.04  | 0.000101 | 0.00112  | ENSMUSG00000008925Gm25718          | snRNA        | 81026773 | 81026890   | upstream     | -5181   | 4950             | shortestDistance |
| chr18 | 81210721 | 81211297 | 577  | -0.91 | 0.00582  | 0.028    | ENSMUSG00000097184930594M17lincRNA | 81226204     | 81236066 | downstream | 25057        | 14907   | shortestDistance |                  |
| chr18 | 81215861 | 81216123 | 263  | 1.46  | 0.00216  | 0.0131   | ENSMUSG00000097184930594M17lincRNA | 81226204     | 81236066 | downstream | 10074        | 81      | shortestDistance |                  |
| chr18 | 81410864 | 81411267 | 404  | 1.49  | 0.000103 | 0.00114  | ENSMUSG00000097184930594M17lincRNA | 81226204     | 81236066 | upstream   | -17500       | 14798   | shortestDistance |                  |
| chr18 | 81536749 | 81537318 | 570  | 0.97  | 0.00608  | 0.029    | ENSMUSG00000097184930594M17lincRNA | 81226204     | 81236066 | upstream   | -300968      | 300683  | shortestDistance |                  |
| chr18 | 81571608 | 81572711 | 1104 | 1.37  | 0.000134 | 0.00142  | ENSMUSG00000097184930594M17lincRNA | 81226204     | 81236066 | upstream   | -336094      | 335542  | shortestDistance |                  |
| chr18 | 81585144 | 81585732 | 589  | 2.63  | 3.06E-11 | 3.40E-09 | ENSMUSG00000097184930594M17lincRNA | 81226204     | 81236066 | upstream   | -349372      | 349078  | shortestDistance |                  |
| chr18 | 81587807 | 81588231 | 425  | 0.96  | 0.00471  | 0.0238   | ENSMUSG00000097184930594M17lincRNA | 81226204     | 81236066 | upstream   | -351953      | 351741  | shortestDistance |                  |
| chr18 | 81627132 | 81627451 | 320  | 1.62  | 0.00257  | 0.0149   | ENSMUSG0000007759Gm26012           | snRNA        | 81981069 | 81981196   | upstream     | -353777 | 353618           | shortestDistance |
| chr18 | 81863598 | 81864183 | 586  | 1.22  | 0.000525 | 0.00429  | ENSMUSG0000007759Gm26012           | snRNA        | 81981069 | 81981196   | upstream     | -117179 | 116886           | shortestDistance |
| chr18 | 82231094 | 82231399 | 306  | 2.07  | 0.000136 | 0.00144  | ENSMUSG0000005862Gm17383           | pseudogene   | 82338774 | 82339816   | upstream     | -107528 | 107375           | shortestDistance |
| chr18 | 82469776 | 82470432 | 657  | 1.14  | 0.00076  | 0.00575  | ENSMUSG0000004160Mbp               | protein_codi | 82475146 | 82585637   | upstream     | -5042   | 4714             | shortestDistance |
| chr18 | 82504886 | 82505364 | 479  | 1.53  | 0.000515 | 0.00422  | ENSMUSG0000004160Mbp               | protein_codi | 82475146 | 82585637   | inside       | 29979   | 29740            | shortestDistance |
| chr18 | 82530170 | 82530453 | 284  | 0.92  | 0.00896  | 0.039    | ENSMUSG0000004160Mbp               | protein_codi | 82475146 | 82585637   | inside       | 55166   | 55024            | shortestDistance |
| chr18 | 82534409 | 82534842 | 434  | 1.76  | 1.81E-06 | 3.88E-05 | ENSMUSG0000004160Mbp               | protein_codi | 82475146 | 82585637   | inside       | 59480   | 50795            | shortestDistance |
| chr18 | 82534922 | 82535459 | 538  | 1.58  | 5.15E-05 | 0.000647 | ENSMUSG0000004160Mbp               | protein_codi | 82475146 | 82585637   | inside       | 60044   | 50178            | shortestDistance |
| chr18 | 82543776 | 82544067 | 292  | 2.36  | 5.00E-06 | 9.19E-05 | ENSMUSG0000004160Mbp               | protein_codi | 82475146 | 82585637   | inside       | 68776   | 41570            | shortestDistance |
| chr18 | 82547762 | 82548093 | 332  | 3.81  | 4.48E-10 | 3.24E-08 | ENSMUSG0000004160Mbp               | protein_codi | 82475146 | 82585637   | inside       | 72782   | 37544            | shortestDistance |
| chr18 | 82735324 | 82735749 | 426  | 1.31  | 0.00146  | 0.00963  | ENSMUSG00000009263Mir5112          | miRNA        | 82720281 | 82720340   | downstream   | 15255   | 14984            | shortestDistance |
| chr18 | 82830123 | 82830598 | 476  | 2.92  | 4.34E-09 | 2.25E-07 | ENSMUSG00000097734930445N18lincRNA | 82855894     | 82870604 | upstream   | -25534       | 25296   | shortestDistance |                  |
| chr18 | 82856302 | 82856865 | 564  | 1     | 0.00225  | 0.0135   | ENSMUSG00000097734930445N18lincRNA | 82855894     | 82870604 | inside     | 690          | 408     | shortestDistance |                  |
| chr18 | 82861871 | 82862493 | 623  | 2.47  | 2.42E-08 | 1.00E-06 | ENSMUSG00000097734930445N18lincRNA | 82855894     | 82870604 | inside     | 6288         | 5977    | shortestDistance |                  |
| chr18 | 82862987 | 82863355 | 369  | 1.81  | 2.95E-07 | 8.37E-06 | ENSMUSG00000097734930445N18lincRNA | 82855894     | 82870604 | inside     | 7277         | 7093    | shortestDistance |                  |
| chr18 | 82876057 | 82876668 | 612  | 1.71  | 8.30E-05 | 0.000954 | ENSMUSG00000097734930445N18lincRNA | 82855894     | 82870604 | downstream | 20468        | 5453    | shortestDistance |                  |
| chr18 | 82894081 | 82895291 | 1211 | 2.1   | 5.62E-09 | 2.82E-07 | ENSMUSG0000005882Zfp516            | protein_codi | 82910879 | 83005314   | upstream     | -16193  | 15588            | shortestDistance |
| chr18 | 82913852 | 82914703 | 852  | 0.82  | 0.0124   | 0.0499   | ENSMUSG0000005882Zfp516            | protein_codi | 82910879 | 83005314   | inside       | 3399    | 2973             | shortestDistance |
| chr18 | 82976547 | 82977065 | 519  | 2.3   | 9.81E-07 | 2.31E-05 | ENSMUSG0000005882Zfp516            | protein_codi | 82910879 | 83005314   | inside       | 65927   | 28249            | shortestDistance |
| chr18 | 83185037 | 83185623 | 587  | -1.12 | 0.00162  | 0.0104   | ENSMUSG00000100431700095A13lincRNA | 83106528     | 83107860 | upstream   | -77470       | 77177   | shortestDistance |                  |
| chr18 | 83192390 | 83192687 | 298  | -1.16 | 0.00693  | 0.0321   | ENSMUSG00000100431700095A13lincRNA | 83106528     | 83107860 | upstream   | -84678       | 84530   | shortestDistance |                  |
| chr18 | 83421761 | 83422407 | 647  | 2.1   | 3.56E-06 | 6.87E-05 | ENSMUSG00000008814Gm24720          | snRNA        | 83355199 | 83355364   | upstream     | -66720  | 66397            | shortestDistance |
| chr18 | 83515721 | 83516049 | 329  | 1.1   | 0.00987  | 0.042    | ENSMUSG00000008814Gm24720          | snRNA        | 83355199 | 83355364   | upstream     | -160521 | 160357           | shortestDistance |
| chr18 | 83648327 | 83648612 | 286  | 3.01  | 2.96E-07 | 8.39E-06 | ENSMUSG00000008814Gm24720          | snRNA        | 83355199 | 83355364   | upstream     | -293106 | 292963           | shortestDistance |
| chr18 | 83828187 | 83828779 | 593  | 1.31  | 0.00102  | 0.00724  | ENSMUSG0000004698Tsh1              | protein_codi | 84011627 | 84086404   | downstream   | 257921  | 182848           | shortestDistance |
| chr18 | 84159152 | 84159751 | 590  | -1.25 | 0.00617  | 0.0293   | ENSMUSG0000004841Zfp407            | protein_codi | 84128027 | 84589725   | inside       | 430279  | 31125            | shortest         |

|       |          |          |      |       |          |          |                   |             |              |          |          |              |         |        |                  |
|-------|----------|----------|------|-------|----------|----------|-------------------|-------------|--------------|----------|----------|--------------|---------|--------|------------------|
| chr19 | 3929122  | 3930051  | 930  | 1.1   | 0.00231  | 0.0138   | ENSMUSG0000002488 | Aldh3b1     | protein_codi | 3913493  | 3929761  | overlapStart | 175     | 290    | shortestDistance |
| chr19 | 4992950  | 4993271  | 322  | 1.32  | 0.00288  | 0.0163   | ENSMUSG0000004590 | Npas4       | protein_codi | 4984355  | 4989971  | upstream     | -3139   | 2979   | shortestDistance |
| chr19 | 5424167  | 5425298  | 1132 | 0.95  | 0.00436  | 0.0224   | ENSMUSG0000002491 | Drp1        | protein_codi | 5422805  | 5424979  | overlapStart | 247     | 319    | shortestDistance |
| chr19 | 5649379  | 5649895  | 517  | 1.81  | 5.75E-06 | 0.000103 | ENSMUSG0000002492 | Rela        | protein_codi | 5637483  | 5648130  | downstream   | 12154   | 1249   | shortestDistance |
| chr19 | 5923924  | 5924240  | 317  | 1.07  | 0.00748  | 0.034    | ENSMUSG0000004566 | Cdc42ep2    | protein_codi | 5917556  | 5924816  | upstream     | 734     | 576    | shortestDistance |
| chr19 | 5965322  | 5965579  | 258  | 1.69  | 0.00076  | 0.00574  | ENSMUSG0000002483 | Pola2       | protein_codi | 5940543  | 5964206  | upstream     | -1244   | 1116   | shortestDistance |
| chr19 | 6235674  | 6236053  | 380  | 1.02  | 0.0121   | 0.0491   | ENSMUSG0000002477 | Ppp2r5b     | protein_codi | 6227765  | 6235872  | overlapStart | 8       | 181    | shortestDistance |
| chr19 | 6364389  | 6364708  | 320  | 1.28  | 0.00103  | 0.00728  | ENSMUSG0000002494 | Sf1         | protein_codi | 6363690  | 6378030  | inside       | 858     | 699    | shortestDistance |
| chr19 | 6401150  | 6401773  | 624  | 1.01  | 0.0117   | 0.0477   | ENSMUSG0000003294 | Rasgrp2     | protein_codi | 6399340  | 6415216  | inside       | 2122    | 1810   | shortestDistance |
| chr19 | 6969563  | 6969972  | 410  | 1.53  | 0.000306 | 0.00279  | ENSMUSG0000002496 | Pclb3       | protein_codi | 6953714  | 6969759  | overlapStart | -9      | 196    | shortestDistance |
| chr19 | 7165083  | 7165347  | 265  | -1.31 | 0.00257  | 0.0149   | ENSMUSG0000003627 | Macrodi     | protein_codi | 7056768  | 7198061  | inside       | 108447  | 32714  | shortestDistance |
| chr19 | 7274345  | 7274893  | 549  | -1.66 | 1.56E-05 | 0.000241 | ENSMUSG0000002496 | Rcor2       | protein_codi | 7267325  | 7275225  | inside       | 7294    | 332    | shortestDistance |
| chr19 | 7307050  | 7307496  | 447  | 1.01  | 0.00883  | 0.0386   | ENSMUSG0000002496 | Mark2       | protein_codi | 7275396  | 7341860  | inside       | 34587   | 31654  | shortestDistance |
| chr19 | 7341281  | 7342111  | 831  | 0.79  | 0.00909  | 0.0395   | ENSMUSG0000002496 | Mark2       | protein_codi | 7275396  | 7341860  | overlapStart | 164     | 251    | shortestDistance |
| chr19 | 7557238  | 7557849  | 612  | -0.91 | 0.00436  | 0.0224   | ENSMUSG0000006067 | Pla2g16     | protein_codi | 7557459  | 7588545  | overlapStart | 85      | 221    | shortestDistance |
| chr19 | 7558067  | 7558603  | 537  | -1.19 | 0.00241  | 0.0142   | ENSMUSG0000006067 | Pla2g16     | protein_codi | 7557459  | 7588545  | inside       | 876     | 608    | shortestDistance |
| chr19 | 8251834  | 8252952  | 1119 | -1.36 | 5.11E-05 | 0.000643 | ENSMUSG0000007504 | Slc22a29    | protein_codi | 8160165  | 8218900  | upstream     | -33493  | 32934  | shortestDistance |
| chr19 | 8517649  | 8518829  | 1181 | -0.81 | 0.01     | 0.0426   | ENSMUSG0000011029 | Gm8189      | transcribed_ | 8473313  | 8541798  | inside       | 23559   | 2269   | shortestDistance |
| chr19 | 8578697  | 8579017  | 321  | -2.2  | 4.95E-06 | 9.12E-05 | ENSMUSG0000008617 | Gm6425      | processed_p  | 8584807  | 8589196  | downstream   | 10339   | 9390   | shortestDistance |
| chr19 | 8997555  | 8998111  | 557  | -0.96 | 0.00466  | 0.0236   | ENSMUSG0000006983 | Ahnak       | protein_codi | 8989284  | 9076919  | inside       | 8549    | 8271   | shortestDistance |
| chr19 | 9038175  | 9038458  | 284  | -1.38 | 0.000635 | 0.00499  | ENSMUSG0000006983 | Ahnak       | protein_codi | 8989284  | 9076919  | inside       | 49032   | 38461  | shortestDistance |
| chr19 | 9041148  | 9041428  | 281  | -1.08 | 0.00639  | 0.0301   | ENSMUSG0000006983 | Ahnak       | protein_codi | 8989284  | 9076919  | inside       | 52004   | 35491  | shortestDistance |
| chr19 | 9836444  | 9837301  | 858  | -1.43 | 8.55E-05 | 0.000976 | ENSMUSG0000009687 | Scgb2a2     | protein_codi | 9847562  | 9852808  | upstream     | -10690  | 10261  | shortestDistance |
| chr19 | 9931094  | 9931926  | 833  | 1.89  | 9.16E-07 | 2.18E-05 | ENSMUSG0000008065 | Gm24484     | miRNA        | 9908158  | 9908278  | downstream   | 23352   | 22816  | shortestDistance |
| chr19 | 10025511 | 10025791 | 281  | -1.01 | 0.00562  | 0.0273   | ENSMUSG0000002468 | Rab31l1     | protein_codi | 10001669 | 10038380 | inside       | 23982   | 12589  | shortestDistance |
| chr19 | 10191292 | 10191707 | 416  | 1.41  | 0.000622 | 0.00491  | ENSMUSG0000009836 | Mir6993     | miRNA        | 10191375 | 10191439 | includeFeatu | 125     | 83     | shortestDistance |
| chr19 | 10272787 | 10273135 | 349  | -1.49 | 0.00106  | 0.00747  | ENSMUSG0000003573 | Dagla       | protein_codi | 10245265 | 10304877 | inside       | 31916   | 27522  | shortestDistance |
| chr19 | 10277322 | 10278100 | 779  | -1.34 | 0.000306 | 0.00278  | ENSMUSG0000003573 | Dagla       | protein_codi | 10245265 | 10304877 | inside       | 27166   | 26777  | shortestDistance |
| chr19 | 10279678 | 10280049 | 372  | 1.39  | 0.0022   | 0.0132   | ENSMUSG0000003573 | Dagla       | protein_codi | 10245265 | 10304877 | inside       | 25013   | 24828  | shortestDistance |
| chr19 | 10801065 | 10801531 | 467  | 0.91  | 0.0107   | 0.0446   | ENSMUSG0000002467 | Cd6         | protein_codi | 10789341 | 10830058 | inside       | 28760   | 11724  | shortestDistance |
| chr19 | 10818577 | 10818893 | 317  | -1.18 | 0.00226  | 0.0135   | ENSMUSG0000002467 | Cd6         | protein_codi | 10789341 | 10830058 | inside       | 11323   | 11165  | shortestDistance |
| chr19 | 10930691 | 10931195 | 505  | -1.43 | 0.000283 | 0.00261  | ENSMUSG0000003411 | Ptgr2       | protein_codi | 10937160 | 10942511 | upstream     | -6217   | 5965   | shortestDistance |
| chr19 | 11120853 | 11121392 | 540  | -1.53 | 0.00189  | 0.0118   | ENSMUSG0000002472 | 1700017D01  | protein_codi | 11096816 | 11130876 | inside       | 9754    | 9484   | shortestDistance |
| chr19 | 11355755 | 11356136 | 382  | 1.67  | 0.000426 | 0.00364  | ENSMUSG0000010039 | Gm28935     | lincRNA      | 11362278 | 11363890 | upstream     | -6332   | 6142   | shortestDistance |
| chr19 | 11513491 | 11513866 | 376  | 1.78  | 8.49E-05 | 0.000971 | ENSMUSG0000005847 | Gm8369      | protein_codi | 11485938 | 11512577 | downstream   | 27740   | 914    | shortestDistance |
| chr19 | 11540172 | 11540716 | 545  | -1.19 | 0.00373  | 0.0198   | ENSMUSG0000002467 | Ms4a4d      | protein_codi | 11536801 | 11558467 | inside       | 3643    | 3371   | shortestDistance |
| chr19 | 11634445 | 11634702 | 258  | 1.44  | 0.00292  | 0.0164   | ENSMUSG0000002468 | Ms4a3       | protein_codi | 11629496 | 11640851 | inside       | 6277    | 4949   | shortestDistance |
| chr19 | 11640640 | 11641207 | 568  | 2.66  | 2.06E-09 | 1.20E-07 | ENSMUSG0000002468 | Ms4a3       | protein_codi | 11629496 | 11640851 | overlapStart | -73     | 211    | shortestDistance |
| chr19 | 11659142 | 11659559 | 418  | 2.08  | 9.95E-07 | 2.34E-05 | ENSMUSG0000005589 | Oosp2       | protein_codi | 11647279 | 11660559 | inside       | 1209    | 1000   | shortestDistance |
| chr19 | 11800498 | 11801275 | 778  | -1.06 | 0.00397  | 0.0209   | ENSMUSG0000004148 | Stx3        | protein_codi | 11775118 | 11819403 | inside       | 18517   | 18128  | shortestDistance |
| chr19 | 11801877 | 11819396 | 690  | -0.96 | 0.00336  | 0.0183   | ENSMUSG0000004148 | Stx3        | protein_codi | 11775118 | 11819403 | inside       | 351     | 7      | shortestDistance |
| chr19 | 11852624 | 11852974 | 351  | 1.76  | 0.000159 | 0.00164  | ENSMUSG0000006055 | Ofrr1418    | protein_codi | 11852587 | 11861066 | inside       | 8267    | 37     | shortestDistance |
| chr19 | 11973967 | 11974259 | 293  | -2.44 | 4.66E-07 | 1.23E-05 | ENSMUSG0000002468 | Osbp        | protein_codi | 11965844 | 11994105 | inside       | 8269    | 8123   | shortestDistance |
| chr19 | 12096776 | 12097248 | 473  | -2.61 | 1.64E-06 | 3.56E-05 | ENSMUSG0000006752 | Ofrr1427    | protein_codi | 12098006 | 12103334 | downstream   | 6322    | 758    | shortestDistance |
| chr19 | 12134156 | 12134616 | 461  | -1.01 | 0.0109   | 0.0452   | ENSMUSG0000006752 | Ofrr76      | protein_codi | 12117996 | 12123203 | upstream     | -11183  | 10953  | shortestDistance |
| chr19 | 12414790 | 12415329 | 540  | -1.21 | 0.00459  | 0.0233   | ENSMUSG0000005081 | Ofrr1441    | protein_codi | 12417433 | 12423569 | upstream     | -2373   | 2104   | shortestDistance |
| chr19 | 12440138 | 12440735 | 598  | 1.87  | 0.000175 | 0.00177  | ENSMUSG0000004006 | Pfpl        | protein_codi | 12427905 | 12432110 | downstream   | 12531   | 8028   | shortestDistance |
| chr19 | 12475350 | 12476134 | 785  | -1.42 | 2.93E-05 | 0.000406 | ENSMUSG0000003998 | Btx4        | protein_codi | 12466341 | 12501996 | inside       | 26254   | 9009   | shortestDistance |
| chr19 | 12488093 | 12488790 | 698  | -1.41 | 0.00012  | 0.00129  | ENSMUSG0000003998 | Btx4        | protein_codi | 12466341 | 12501996 | inside       | 13554   | 13206  | shortestDistance |
| chr19 | 12517820 | 12518251 | 432  | -1.09 | 0.00306  | 0.0171   | ENSMUSG0000008621 | A330040F151 | processed_tr | 12517915 | 12596566 | overlapEnd   | 78530   | 95     | shortestDistance |
| chr19 | 12518288 | 12518738 | 451  | -1.21 | 0.00164  | 0.0105   | ENSMUSG0000008621 | A330040F151 | processed_tr | 12517915 | 12596566 | inside       | 78053   | 373    | shortestDistance |
| chr19 | 12556337 | 12556648 | 312  | 2.32  | 1.77E-05 | 0.000267 | ENSMUSG0000002469 | Fam111a     | protein_codi | 12545740 | 12589768 | inside       | 10752   | 10597  | shortestDistance |
| chr19 | 12558183 | 12558749 | 567  | 1.24  | 0.0024   | 0.0142   | ENSMUSG0000002469 | Fam111a     | protein_codi | 12545740 | 12589768 | inside       | 12726   | 12443  | shortestDistance |
| chr19 | 12591964 | 12592260 | 297  | -0.8  | 0.0118   | 0.0482   | ENSMUSG0000008621 | A330040F151 | processed_tr | 12517915 | 12596566 | inside       | 4454    | 4306   | shortestDistance |
| chr19 | 12595440 | 12595699 | 1160 | -1.17 | 0.000153 | 0.00158  | ENSMUSG0000008621 | A330040F151 | processed_tr | 12517915 | 12596566 | overlapStart | 546     | 33     | shortestDistance |
| chr19 | 12806182 | 12806616 | 435  | -1.1  | 0.00229  | 0.0137   | ENSMUSG0000002469 | Lpxn        | protein_codi | 12798606 | 12833807 | inside       | 7793    | 7576   | shortestDistance |
| chr19 | 12819837 | 12820382 | 546  | -1.15 | 0.00122  | 0.00836  | ENSMUSG0000002469 | Lpxn        | protein_codi | 12798606 | 12833807 | inside       | 21504   | 13425  | shortestDistance |
| chr19 | 13981230 | 13981579 | 350  | -1.05 | 0.00359  | 0.0192   | ENSMUSG0000009807 | Gm26993     | processed_p  | 14017583 | 14018371 | downstream   | 36967   | 36004  | shortestDistance |
| chr19 | 14225011 | 14225431 | 421  | -1.84 | 6.79E-07 | 1.69E-05 | ENSMUSG0000009807 | Gm26993     | processed_p  | 14017583 | 14018371 | upstream     | -206850 | 206640 | shortestDistance |
| chr19 | 14351637 | 14351935 | 299  | -1.27 | 0.00172  | 0.011    | ENSMUSG0000002464 | Tie4        | protein_codi | 14448072 | 14598051 | downstream   | 246265  | 96137  | shortestDistance |
| chr19 | 14387793 | 14388160 | 368  | -1.33 | 0.000194 | 0.00192  | ENSMUSG0000002464 | Tie4        | protein_codi | 14448072 | 14598051 | downstream   | 210075  | 59912  | shortestDistance |
| chr19 | 14388581 | 14388905 | 325  | -1.14 | 0.000775 | 0.00583  | ENSMUSG0000002464 | Tie4        | protein_codi | 14448072 | 14598051 | downstream   | 209308  | 59167  | shortestDistance |
| chr19 | 14436061 | 14436352 | 292  | -2.13 | 1.78E-05 | 0.000268 | ENSMUSG0000002464 | Tie4        | protein_codi | 14448072 | 14598051 | downstream   | 161845  | 11720  | shortestDistance |
| chr19 | 14436615 | 14437085 | 471  | -1.77 | 5.35E-06 | 9.75E-05 | ENSMUSG0000002464 | Tie4        | protein_codi | 14448072 | 14598051 | downstream   | 161201  | 10987  | shortestDistance |
| chr19 | 14449738 | 14450131 | 394  | -1.08 | 0.00205  | 0.0126   | ENSMUSG0000002464 | Tie4        | protein_codi | 14448072 | 14598051 | inside       | 148117  | 1666   | shortestDistance |
| chr19 | 14468755 | 14469201 | 447  | -1.15 | 0.00202  | 0.0124   | ENSMUSG0000002464 | Tie4        | protein_codi | 14448072 | 14598051 | inside       | 129073  | 20683  | shortestDistance |
| chr19 | 14485188 | 14485727 | 540  | -1.59 | 3.68E-05 | 0.000491 | ENSMUSG0000002464 | Tie4        | protein_codi | 14448072 | 14598051 | inside       | 112593  | 37116  | shortestDistance |
| chr19 | 14493061 | 14493480 | 420  | -1.07 | 0.00628  | 0.0297   | ENSMUSG0000002464 | Tie4        | protein_codi | 14448072 | 14598051 | inside       | 104781  | 44989  | shortestDistance |
| chr19 | 14506067 | 14506392 | 326  | -1.74 | 1.13E-05 | 0.000183 | ENSMUSG0000002464 | Tie4        | protein_codi | 14448072 | 14598051 | inside       | 91821   | 57995  | shortestDistance |
| chr19 | 14563193 | 14564093 | 901  | -1.68 | 2.78E-06 | 5.59E-05 | ENSMUSG0000002464 | Tie4        | protein_codi | 14448072 | 14598051 | inside       | 34408   | 33958  | shortestDistance |
| chr19 | 14635237 | 14635888 | 652  | -0.89 | 0.00723  | 0.0331   | ENSMUSG0000010348 | Gm37997     | TEC          | 14658667 | 14658933 | upstream     | -23105  | 22779  | shortestDistance |
| chr19 | 14681349 | 14681688 | 340  |       |          |          |                   |             |              |          |          |              |         |        |                  |







|      |          |           |      |       |          |          |                   |             |              |          |          |              |        |        |                  |
|------|----------|-----------|------|-------|----------|----------|-------------------|-------------|--------------|----------|----------|--------------|--------|--------|------------------|
| chr2 | 8645500  | 8645758   | 259  | -1.19 | 0.0025   | 0.0146   | ENSMUSG0000008437 | Gm13255     | processed_p  | 8633937  | 8634483  | downstream   | 11692  | 11017  | shortestDistance |
| chr2 | 8691286  | 8691612   | 327  | 2.33  | 1.59E-07 | 4.93E-06 | ENSMUSG0000008437 | Gm13255     | processed_p  | 8633937  | 8634483  | downstream   | 57512  | 56803  | shortestDistance |
| chr2 | 8770712  | 8771013   | 302  | -1.17 | 0.00346  | 0.0187   | ENSMUSG0000008437 | Gm13255     | processed_p  | 8633937  | 8634483  | downstream   | 136925 | 136229 | shortestDistance |
| chr2 | 8946539  | 8947438   | 846  | -1.21 | 0.000746 | 0.00565  | ENSMUSG0000008295 | Gm13217     | unprocessed  | 9041124  | 9042484  | downstream   | 95468  | 93686  | shortestDistance |
| chr2 | 9095105  | 9095800   | 696  | -1    | 0.00341  | 0.0185   | ENSMUSG0000008295 | Gm13217     | unprocessed  | 9041124  | 9042484  | upstream     | -52968 | 52621  | shortestDistance |
| chr2 | 9349923  | 9350371   | 449  | 2.29  | 7.72E-07 | 1.89E-05 | ENSMUSG0000007960 | Gm13219     | lincRNA      | 9352431  | 9447676  | upstream     | -2284  | 2060   | shortestDistance |
| chr2 | 9354930  | 9355307   | 378  | -2.56 | 8.48E-07 | 2.04E-05 | ENSMUSG0000007960 | Gm13219     | lincRNA      | 9352431  | 9447676  | inside       | 2687   | 2499   | shortestDistance |
| chr2 | 9361971  | 9362362   | 392  | -2.88 | 8.61E-09 | 4.09E-07 | ENSMUSG0000007960 | Gm13219     | lincRNA      | 9352431  | 9447676  | inside       | 9735   | 9540   | shortestDistance |
| chr2 | 9377009  | 9377326   | 318  | -1.89 | 2.44E-06 | 4.99E-05 | ENSMUSG0000007960 | Gm13219     | lincRNA      | 9352431  | 9447676  | inside       | 24737  | 24578  | shortestDistance |
| chr2 | 9520051  | 9520448   | 398  | -2.48 | 3.18E-08 | 1.26E-06 | ENSMUSG0000008126 | Gm13220     | processed_p  | 9575836  | 9576343  | upstream     | -55586 | 55388  | shortestDistance |
| chr2 | 9593727  | 9594550   | 824  | -1.12 | 0.000549 | 0.00444  | ENSMUSG0000007960 | Gm13218     | lincRNA      | 9591219  | 9597843  | inside       | 3705   | 2508   | shortestDistance |
| chr2 | 9623733  | 9624054   | 322  | -1.01 | 0.00763  | 0.0345   | ENSMUSG0000010427 | Gm37866     | TEC          | 9630646  | 9631341  | downstream   | 7447   | 6592   | shortestDistance |
| chr2 | 9852667  | 9852891   | 225  | -1.4  | 0.00282  | 0.016    | ENSMUSG0000001561 | Gata3       | protein_codi | 9857078  | 9890034  | downstream   | 37255  | 4187   | shortestDistance |
| chr2 | 9870868  | 9871584   | 717  | -0.79 | 0.00907  | 0.0394   | ENSMUSG0000001561 | Gata3       | protein_codi | 9857078  | 9890034  | inside       | 18808  | 13790  | shortestDistance |
| chr2 | 9872536  | 9873066   | 531  | -1.51 | 1.34E-05 | 0.000211 | ENSMUSG0000001561 | Gata3       | protein_codi | 9857078  | 9890034  | inside       | 17233  | 15458  | shortestDistance |
| chr2 | 9896241  | 9896550   | 310  | -2.43 | 1.07E-06 | 2.48E-05 | ENSMUSG0000001561 | Gata3       | protein_codi | 9857078  | 9890034  | upstream     | -6362  | 6207   | shortestDistance |
| chr2 | 9905902  | 9906487   | 586  | -1.5  | 0.000259 | 0.00244  | ENSMUSG0000007553 | Gm13262     | antisense_RI | 9906178  | 9914678  | overlapStart | 16     | 276    | shortestDistance |
| chr2 | 9926112  | 9926916   | 805  | -1.46 | 2.28E-05 | 0.00033  | ENSMUSG0000002578 | Taf3        | protein_codi | 9914552  | 10048596 | inside       | 122082 | 11560  | shortestDistance |
| chr2 | 9961770  | 9962102   | 333  | -1.79 | 2.87E-06 | 5.74E-05 | ENSMUSG0000002578 | Taf3        | protein_codi | 9914552  | 10048596 | inside       | 86660  | 47218  | shortestDistance |
| chr2 | 9971917  | 9972343   | 427  | 2.13  | 1.67E-06 | 3.62E-05 | ENSMUSG0000002578 | Taf3        | protein_codi | 9914552  | 10048596 | inside       | 76466  | 57365  | shortestDistance |
| chr2 | 9986092  | 9986511   | 420  | -1.40 | 0.00746  | 0.0339   | ENSMUSG0000002578 | Taf3        | protein_codi | 9914552  | 10048596 | inside       | 62294  | 62085  | shortestDistance |
| chr2 | 10024210 | 10024682  | 473  | -1.48 | 0.00603  | 0.0288   | ENSMUSG0000002578 | Taf3        | protein_codi | 9914552  | 10048596 | inside       | 24150  | 23914  | shortestDistance |
| chr2 | 10137390 | 10137637  | 248  | 2.53  | 3.66E-05 | 0.000489 | ENSMUSG0000003725 | Itih2       | protein_codi | 10094593 | 10131396 | upstream     | -6118  | 5994   | shortestDistance |
| chr2 | 10145593 | 10145860  | 268  | -1.3  | 0.000135 | 0.00143  | ENSMUSG0000002578 | Itih5       | protein_codi | 10153571 | 10256529 | upstream     | -7845  | 7711   | shortestDistance |
| chr2 | 10284586 | 10284900  | 315  | -1.06 | 0.00737  | 0.0336   | ENSMUSG0000002578 | Itih5       | protein_codi | 10153571 | 10256529 | downstream   | 131172 | 28057  | shortestDistance |
| chr2 | 10293597 | 10293866  | 270  | -1.7  | 7.49E-05 | 0.000878 | ENSMUSG0000002578 | Itih5       | protein_codi | 10153571 | 10256529 | downstream   | 140161 | 37068  | shortestDistance |
| chr2 | 10314613 | 10315577  | 965  | -0.8  | 0.0112   | 0.0463   | ENSMUSG0000008674 | Gm13261     | processed_tr | 10339283 | 10374041 | downstream   | 58946  | 23706  | shortestDistance |
| chr2 | 10399024 | 10399077  | 754  | -1.05 | 0.00143  | 0.00947  | ENSMUSG0000006118 | Sfmbt2      | protein_codi | 10370510 | 10595253 | inside       | 19890  | 19514  | shortestDistance |
| chr2 | 10405953 | 10406408  | 456  | -2.22 | 6.71E-08 | 2.37E-06 | ENSMUSG0000006118 | Sfmbt2      | protein_codi | 10370510 | 10595253 | inside       | 35670  | 35443  | shortestDistance |
| chr2 | 10825538 | 10826299  | 762  | -1.2  | 0.000288 | 0.00266  | ENSMUSG0000010323 | Gm18547     | processed_p  | 10893709 | 10894519 | upstream     | -67791 | 67410  | shortestDistance |
| chr2 | 11059728 | 11060027  | 300  | -1.02 | 0.00593  | 0.0284   | ENSMUSG0000008525 | Gm13264     | lincRNA      | 11036873 | 11060129 | inside       | 23005  | 102    | shortestDistance |
| chr2 | 11100997 | 111100617 | 521  | -1.02 | 0.00453  | 0.0231   | ENSMUSG0000008390 | Gm13294     | processed_p  | 11089933 | 11100262 | overlapStart | -95    | 165    | shortestDistance |
| chr2 | 11171804 | 11172794  | 991  | -0.82 | 0.011    | 0.0457   | ENSMUSG000000677  | Prkq        | protein_codi | 11172108 | 11301222 | overlapStart | 191    | 304    | shortestDistance |
| chr2 | 11300312 | 11300772  | 461  | 2.54  | 3.89E-08 | 1.50E-06 | ENSMUSG0000002677 | Prkq        | protein_codi | 11172108 | 11301222 | inside       | 128434 | 450    | shortestDistance |
| chr2 | 11383850 | 11384223  | 374  | 2.98  | 1.36E-10 | 1.20E-08 | ENSMUSG0000010332 | 4933403111  | TEC          | 11383787 | 11384907 | inside       | 871    | 63     | shortestDistance |
| chr2 | 11398415 | 11398800  | 386  | -1    | 0.00718  | 0.0329   | ENSMUSG0000010267 | 80304428051 | lincRNA      | 11338366 | 11398501 | overlapStart | -107   | 86     | shortestDistance |
| chr2 | 11441610 | 11442352  | 743  | 1.97  | 1.43E-07 | 4.51E-06 | ENSMUSG0000000821 | Gm13296     | processed_p  | 11420224 | 11421220 | downstream   | 21757  | 20390  | shortestDistance |
| chr2 | 11524643 | 11525150  | 508  | 3.21  | 2.03E-11 | 2.42E-09 | ENSMUSG0000010232 | Gm10851     | antisense_RI | 11521706 | 11530836 | inside       | 3190   | 2937   | shortestDistance |
| chr2 | 11548453 | 11548979  | 527  | 1.17  | 0.000485 | 0.00403  | ENSMUSG0000002677 | Pfkfb3      | protein_codi | 11471433 | 11554077 | inside       | 5361   | 5098   | shortestDistance |
| chr2 | 11596365 | 11597186  | 552  | 2.09  | 6.14E-07 | 1.55E-05 | ENSMUSG0000003719 | Rbm17       | protein_codi | 11585437 | 11604153 | inside       | 7243   | 6967   | shortestDistance |
| chr2 | 11653292 | 11654014  | 723  | -1.32 | 1.80E-05 | 0.00027  | ENSMUSG0000002677 | Il2ra       | protein_codi | 11642807 | 11693193 | inside       | 10846  | 10485  | shortestDistance |
| chr2 | 11655377 | 11655708  | 332  | -0.88 | 0.00949  | 0.0408   | ENSMUSG0000002677 | Il2ra       | protein_codi | 11642807 | 11693193 | inside       | 12735  | 12570  | shortestDistance |
| chr2 | 11705161 | 11706350  | 1190 | -0.8  | 0.00937  | 0.0404   | ENSMUSG0000002320 | Il5f5a      | protein_codi | 11705290 | 11734317 | overlapStart | 466    | 129    | shortestDistance |
| chr2 | 11866726 | 11867072  | 347  | -1.89 | 0.000223 | 0.00216  | ENSMUSG0000010354 | Gm34768     | unprocessed  | 11900082 | 11910310 | upstream     | -33183 | 33010  | shortestDistance |
| chr2 | 11877971 | 11880688  | 718  | 1.01  | 0.00637  | 0.0301   | ENSMUSG0000010354 | Gm34768     | unprocessed  | 11900082 | 11910310 | upstream     | -19752 | 19394  | shortestDistance |
| chr2 | 12004353 | 12004731  | 379  | -1.32 | 0.000787 | 0.0059   | ENSMUSG0000008080 | Gm13310     | processed_p  | 12082612 | 12083992 | downstream   | 79450  | 77881  | shortestDistance |
| chr2 | 12084359 | 12084747  | 389  | 1.55  | 0.000413 | 0.00355  | ENSMUSG0000008080 | Gm13310     | processed_p  | 12082612 | 12083992 | upstream     | -561   | 367    | shortestDistance |
| chr2 | 12085581 | 12085839  | 259  | 2.33  | 7.23E-06 | 0.000126 | ENSMUSG0000008080 | Gm13310     | processed_p  | 12082612 | 12083992 | upstream     | -1718  | 1589   | shortestDistance |
| chr2 | 12108343 | 12108745  | 403  | 2.65  | 6.37E-08 | 2.27E-06 | ENSMUSG0000002676 | Igta8a      | protein_codi | 12106632 | 12301922 | inside       | 193378 | 1711   | shortestDistance |
| chr2 | 12160345 | 12160885  | 541  | -0.97 | 0.00488  | 0.0244   | ENSMUSG0000002676 | Igta8a      | protein_codi | 12106632 | 12301922 | inside       | 141307 | 53713  | shortestDistance |
| chr2 | 12174713 | 12175639  | 927  | 1.42  | 0.00204  | 0.0125   | ENSMUSG0000002676 | Igta8a      | protein_codi | 12106632 | 12301922 | inside       | 126746 | 68081  | shortestDistance |
| chr2 | 12208126 | 12208602  | 477  | -1.52 | 2.74E-06 | 5.51E-05 | ENSMUSG0000002676 | Igta8a      | protein_codi | 12106632 | 12301922 | inside       | 93558  | 93320  | shortestDistance |
| chr2 | 12301456 | 12302177  | 722  | -1.4  | 3.76E-05 | 0.000499 | ENSMUSG0000002676 | Igta8a      | protein_codi | 12106632 | 12301922 | overlapStart | 106    | 255    | shortestDistance |
| chr2 | 12318761 | 12319149  | 389  | -1.36 | 0.000853 | 0.00629  | ENSMUSG0000008684 | E030013119R | antisense_RI | 12300946 | 12312315 | downstream   | 18009  | 6446   | shortestDistance |
| chr2 | 12327156 | 12328126  | 971  | -1.1  | 0.00611  | 0.0291   | ENSMUSG0000008684 | E030013119R | antisense_RI | 12300946 | 12312315 | downstream   | 26695  | 14841  | shortestDistance |
| chr2 | 12389088 | 12389551  | 464  | -1.26 | 0.000407 | 0.00351  | ENSMUSG0000002676 | Mindy3      | protein_codi | 12347263 | 12419470 | inside       | 30150  | 29919  | shortestDistance |
| chr2 | 12418146 | 12419749  | 1604 | -0.88 | 0.00544  | 0.0266   | ENSMUSG0000002676 | Mindy3      | protein_codi | 12347263 | 12419470 | overlapStart | 522    | 279    | shortestDistance |
| chr2 | 12459786 | 12460124  | 339  | -1.61 | 2.62E-05 | 0.00037  | ENSMUSG0000008354 | Gm13321     | processed_p  | 12421627 | 12422026 | upstream     | -37929 | 37760  | shortestDistance |
| chr2 | 12495464 | 12495899  | 436  | -1.17 | 0.00111  | 0.00772  | ENSMUSG0000008354 | Gm13321     | processed_p  | 12421627 | 12422026 | upstream     | -73656 | 73438  | shortestDistance |
| chr2 | 12709070 | 12709562  | 493  | -0.89 | 0.00498  | 0.0248   | ENSMUSG0000010404 | Gm37565     | lincRNA      | 12697417 | 12706853 | downstream   | 11899  | 2217   | shortestDistance |
| chr2 | 13010004 | 13011479  | 1476 | -1.04 | 0.00129  | 0.00872  | ENSMUSG0000010290 | Gm37811     | TEC          | 13009886 | 13012486 | inside       | 856    | 118    | shortestDistance |
| chr2 | 13224290 | 13224999  | 710  | -1.12 | 0.0013   | 0.00877  | ENSMUSG0000002672 | Rsu1        | protein_codi | 13076821 | 13271415 | inside       | 46771  | 46416  | shortestDistance |
| chr2 | 13233204 | 13233796  | 593  | -1.3  | 0.00102  | 0.00723  | ENSMUSG0000002672 | Rsu1        | protein_codi | 13076821 | 13271415 | inside       | 37915  | 37619  | shortestDistance |
| chr2 | 13234108 | 13234324  | 217  | -1.25 | 0.00166  | 0.0106   | ENSMUSG0000002672 | Rsu1        | protein_codi | 13076821 | 13271415 | inside       | 37199  | 37091  | shortestDistance |
| chr2 | 13262873 | 13263540  | 668  | -1.55 | 4.32E-05 | 0.00056  | ENSMUSG0000002672 | Rsu1        | protein_codi | 13076821 | 13271415 | inside       | 8209   | 7875   | shortestDistance |
| chr2 | 13384620 | 13385281  | 662  | -1.61 | 7.05E-05 | 0.000838 | ENSMUSG0000002672 | Cubn        | protein_codi | 13276338 | 13491813 | inside       | 106863 | 106532 | shortestDistance |
| chr2 | 13390751 | 13391531  | 781  | -1.06 | 0.00583  | 0.0281   | ENSMUSG0000002672 | Cubn        | protein_codi | 13276338 | 13491813 | inside       | 100672 | 100282 | shortestDistance |
| chr2 | 13398843 | 13399338  | 496  | -1.68 | 3.11E-05 | 0.000427 | ENSMUSG0000002672 | Cubn        | protein_codi | 13276338 | 13491813 | inside       | 92723  | 92475  | shortestDistance |
| chr2 | 13407239 | 13407680  | 442  | -0.96 | 0.00143  | 0.00945  | ENSMUSG0000002672 | Cubn        | protein_codi | 13276338 | 13491813 | inside       | 84353  | 84133  | shortestDistance |
| chr2 | 13537796 | 13538611  | 816  | 1.13  | 0.000913 | 0.00663  | ENSMUSG0000002672 | Trdm1t      | protein_codi | 13509014 | 13544668 | inside       | 6464   | 6057   | shortestDistance |
| chr2 | 13792987 | 13794104  | 1118 | -0.78 | 0.00887  | 0.0387   | ENSMUSG0000000341 | Sfbsia6     | protein_codi | 13651021 | 13794064 | overlapStart | 518    | 40     | shortestDistance |
| chr2 |          |           |      |       |          |          |                   |             |              |          |          |              |        |        |                  |

|      |          |          |      |       |          |          |                   |             |              |          |          |              |         |        |                  |
|------|----------|----------|------|-------|----------|----------|-------------------|-------------|--------------|----------|----------|--------------|---------|--------|------------------|
| chr2 | 16914512 | 16915055 | 544  | -1.52 | 1.84E-05 | 0.000276 | ENSMUSG0000007695 | Gm24933     | miRNA        | 16959909 | 16960018 | downstream   | 45234   | 44854  | shortestDistance |
| chr2 | 17290530 | 17291286 | 757  | 1.75  | 5.51E-06 | 9.98E-05 | ENSMUSG0000005370 | Nebl        | protein_codi | 17343909 | 17731464 | downstream   | 440556  | 52623  | shortestDistance |
| chr2 | 17326657 | 17326933 | 277  | -1.13 | 0.00531  | 0.0261   | ENSMUSG0000005370 | Nebl        | protein_codi | 17343909 | 17731464 | downstream   | 440669  | 16976  | shortestDistance |
| chr2 | 17437372 | 17437714 | 343  | 4.23  | 9.47E-11 | 1.74E-10 | ENSMUSG0000005370 | Nebl        | protein_codi | 17343909 | 17731464 | inside       | 293921  | 93463  | shortestDistance |
| chr2 | 17438313 | 17438679 | 367  | 2.96  | 2.76E-11 | 3.12E-09 | ENSMUSG0000005370 | Nebl        | protein_codi | 17343909 | 17731464 | inside       | 292968  | 94404  | shortestDistance |
| chr2 | 17642880 | 17643151 | 272  | -1.05 | 0.00695  | 0.0321   | ENSMUSG0000005370 | Nebl        | protein_codi | 17343909 | 17731464 | inside       | 88448   | 88313  | shortestDistance |
| chr2 | 17702787 | 17703265 | 479  | -1.04 | 0.0105   | 0.0442   | ENSMUSG0000005370 | Nebl        | protein_codi | 17343909 | 17731464 | inside       | 28438   | 28199  | shortestDistance |
| chr2 | 17730731 | 17731613 | 883  | -0.85 | 0.00667  | 0.0312   | ENSMUSG0000005370 | Nebl        | protein_codi | 17343909 | 17731464 | overlapStart | 292     | 149    | shortestDistance |
| chr2 | 17815368 | 17815684 | 317  | -1.28 | 0.00461  | 0.0234   | ENSMUSG0000008185 | Gm13323     | processed_p  | 17796834 | 17797984 | upstream     | -17542  | 17384  | shortestDistance |
| chr2 | 17854127 | 17854455 | 329  | -1.05 | 0.00285  | 0.0161   | ENSMUSG0000008185 | Gm13323     | processed_p  | 17796834 | 17797984 | upstream     | -56307  | 56143  | shortestDistance |
| chr2 | 17861115 | 17861518 | 404  | -1.34 | 0.000144 | 0.00151  | ENSMUSG0000008185 | Gm13323     | processed_p  | 17796834 | 17797984 | upstream     | -63332  | 61331  | shortestDistance |
| chr2 | 17861633 | 17862141 | 509  | -0.96 | 0.00802  | 0.0359   | ENSMUSG0000008185 | Gm13323     | processed_p  | 17796834 | 17797984 | upstream     | -63903  | 63649  | shortestDistance |
| chr2 | 17989569 | 17989926 | 358  | 1.52  | 0.000914 | 0.00664  | ENSMUSG0000006265 | H2a12a      | protein_codi | 17996417 | 17996958 | downstream   | 7210    | 6491   | shortestDistance |
| chr2 | 18087660 | 18088040 | 381  | 1.82  | 5.04E-05 | 0.000636 | ENSMUSG0000002674 | Mit10       | protein_codi | 18055237 | 18212388 | inside       | 32613   | 32423  | shortestDistance |
| chr2 | 18169572 | 18169968 | 397  | -1.18 | 0.00472  | 0.0238   | ENSMUSG0000002674 | Mit10       | protein_codi | 18055237 | 18212388 | inside       | 114533  | 42420  | shortestDistance |
| chr2 | 18630499 | 18631017 | 519  | 1.39  | 0.00737  | 0.0336   | ENSMUSG0000008294 | Gm13355     | processed_p  | 18641786 | 18642102 | downstream   | 11344   | 10769  | shortestDistance |
| chr2 | 19119880 | 19120336 | 457  | 1.87  | 0.000841 | 0.00623  | ENSMUSG0000008328 | Gm13332     | processed_p  | 19101701 | 19103098 | upstream     | -17010  | 16782  | shortestDistance |
| chr2 | 19351631 | 19352243 | 613  | 2.68  | 3.96E-08 | 1.52E-06 | ENSMUSG000000767  | 4930447M23  | lincRNA      | 19344317 | 19351050 | downstream   | 7620    | 581    | shortestDistance |
| chr2 | 19431151 | 19431408 | 258  | -1.29 | 0.00461  | 0.0234   | ENSMUSG0000008710 | Gm13344     | antisense_RI | 19429104 | 19431983 | inside       | 703     | 575    | shortestDistance |
| chr2 | 19448053 | 19448334 | 282  | -1.58 | 6.99E-05 | 0.000832 | ENSMUSG0000002673 | Pf1fa       | protein_codi | 19445663 | 19447501 | downstream   | 2531    | 552    | shortestDistance |
| chr2 | 19519818 | 19520175 | 358  | -0.96 | 0.00367  | 0.0196   | ENSMUSG0000002673 | 4921504E06f | protein_codi | 19462837 | 19553914 | inside       | 33918   | 33739  | shortestDistance |
| chr2 | 19528815 | 19529317 | 503  | -0.92 | 0.00644  | 0.0303   | ENSMUSG0000002673 | 4921504E06f | protein_codi | 19462837 | 19553914 | inside       | 24848   | 24597  | shortestDistance |
| chr2 | 19551253 | 19551602 | 350  | -0.95 | 0.0111   | 0.046    | ENSMUSG0000002673 | 4921504E06f | protein_codi | 19462837 | 19553914 | inside       | 2486    | 2312   | shortestDistance |
| chr2 | 19553738 | 19554642 | 806  | -0.83 | 0.00958  | 0.0411   | ENSMUSG0000002673 | 4921504E06f | protein_codi | 19462837 | 19553914 | overlapStart | -326    | 77     | shortestDistance |
| chr2 | 19567046 | 19567768 | 723  | 1.18  | 0.000523 | 0.00427  | ENSMUSG0000008662 | Gm13348     | antisense_RI | 19634034 | 19636986 | downstream   | 9579    | 6266   | shortestDistance |
| chr2 | 19628004 | 19628578 | 575  | 1.27  | 0.000671 | 0.00521  | ENSMUSG0000008662 | Gm13348     | antisense_RI | 19634034 | 19636986 | downstream   | 8695    | 5456   | shortestDistance |
| chr2 | 19665818 | 19666348 | 531  | -1.26 | 6.01E-05 | 0.000737 | ENSMUSG0000004341 | Otd1        | protein_codi | 19657752 | 19660583 | downstream   | 8331    | 5235   | shortestDistance |
| chr2 | 19715535 | 19716246 | 712  | -1.06 | 0.000733 | 0.00558  | ENSMUSG0000007734 | Gm24670     | snoRNA       | 19691288 | 19691419 | downstream   | 24602   | 24116  | shortestDistance |
| chr2 | 19734196 | 19734951 | 756  | -1.92 | 1.80E-05 | 0.00027  | ENSMUSG0000007734 | Gm24670     | snoRNA       | 19691288 | 19691419 | downstream   | 43286   | 42777  | shortestDistance |
| chr2 | 19909431 | 19910058 | 628  | -1.12 | 0.00208  | 0.0127   | ENSMUSG0000003661 | Et14        | protein_codi | 19909780 | 20810713 | overlapStart | -36     | 278    | shortestDistance |
| chr2 | 19919049 | 19919700 | 652  | -1.03 | 0.0023   | 0.0137   | ENSMUSG0000003661 | Et14        | protein_codi | 19909780 | 20810713 | inside       | 9594    | 9269   | shortestDistance |
| chr2 | 20247910 | 20248717 | 808  | -1.36 | 0.000262 | 0.00246  | ENSMUSG0000003661 | Et14        | protein_codi | 19909780 | 20810713 | inside       | 338534  | 338130 | shortestDistance |
| chr2 | 20276172 | 20276626 | 455  | -0.99 | 0.00868  | 0.0381   | ENSMUSG0000003661 | Et14        | protein_codi | 19909780 | 20810713 | inside       | 366619  | 366392 | shortestDistance |
| chr2 | 20284930 | 20285164 | 235  | -2.09 | 3.74E-05 | 0.000498 | ENSMUSG0000003661 | Et14        | protein_codi | 19909780 | 20810713 | inside       | 375267  | 375150 | shortestDistance |
| chr2 | 20339556 | 20339338 | 283  | -1.53 | 0.000172 | 0.00175  | ENSMUSG0000003661 | Et14        | protein_codi | 19909780 | 20810713 | inside       | 429417  | 429276 | shortestDistance |
| chr2 | 20339455 | 20340352 | 898  | -1.75 | 2.98E-05 | 0.000412 | ENSMUSG0000003661 | Et14        | protein_codi | 19909780 | 20810713 | inside       | 430124  | 429675 | shortestDistance |
| chr2 | 20445237 | 20445754 | 518  | -1.66 | 3.60E-05 | 0.000482 | ENSMUSG0000003661 | Et14        | protein_codi | 19909780 | 20810713 | inside       | 535716  | 364959 | shortestDistance |
| chr2 | 20519829 | 20520545 | 717  | -1.23 | 0.00125  | 0.00851  | ENSMUSG0000003661 | Et14        | protein_codi | 19909780 | 20810713 | inside       | 610407  | 290168 | shortestDistance |
| chr2 | 20520650 | 20521105 | 456  | -1.72 | 2.11E-06 | 4.41E-05 | ENSMUSG0000003661 | Et14        | protein_codi | 19909780 | 20810713 | inside       | 611098  | 289608 | shortestDistance |
| chr2 | 20616001 | 20616270 | 270  | -1.08 | 0.00491  | 0.0245   | ENSMUSG0000003661 | Et14        | protein_codi | 19909780 | 20810713 | inside       | 706356  | 194443 | shortestDistance |
| chr2 | 20747734 | 20748075 | 342  | -1.23 | 0.0027   | 0.0155   | ENSMUSG0000003661 | Et14        | protein_codi | 19909780 | 20810713 | inside       | 838124  | 62638  | shortestDistance |
| chr2 | 20748458 | 20748864 | 407  | -1.6  | 0.000112 | 0.00123  | ENSMUSG0000003661 | Et14        | protein_codi | 19909780 | 20810713 | inside       | 838881  | 61849  | shortestDistance |
| chr2 | 20779733 | 20780201 | 469  | -0.89 | 0.0104   | 0.0438   | ENSMUSG0000003661 | Et14        | protein_codi | 19909780 | 20810713 | inside       | 870187  | 30512  | shortestDistance |
| chr2 | 20898726 | 20899771 | 1046 | -0.81 | 0.0118   | 0.0481   | ENSMUSG0000003659 | Arhgap21    | protein_codi | 20847919 | 20968881 | inside       | 69633   | 50807  | shortestDistance |
| chr2 | 21016563 | 21016984 | 422  | -1.22 | 0.00125  | 0.00853  | ENSMUSG0000008682 | Gm13377     | unprocessed  | 21044808 | 21141954 | downstream   | 125180  | 27824  | shortestDistance |
| chr2 | 21037161 | 21037562 | 402  | -1.3  | 0.0022   | 0.0133   | ENSMUSG0000008682 | Gm13377     | unprocessed  | 21044808 | 21141954 | downstream   | 104592  | 7246   | shortestDistance |
| chr2 | 21054533 | 21055057 | 525  | -1.24 | 0.000937 | 0.00678  | ENSMUSG0000008682 | Gm13377     | unprocessed  | 21044808 | 21141954 | inside       | 87159   | 9725   | shortestDistance |
| chr2 | 21067320 | 21067840 | 611  | 2.3   | 5.83E-06 | 0.000105 | ENSMUSG0000008682 | Gm13377     | unprocessed  | 21044808 | 21141954 | inside       | 74419   | 24222  | shortestDistance |
| chr2 | 21091007 | 21091414 | 408  | 2.18  | 5.63E-07 | 1.44E-05 | ENSMUSG0000008682 | Gm13377     | unprocessed  | 21044808 | 21141954 | inside       | 50744   | 46199  | shortestDistance |
| chr2 | 21111238 | 21111900 | 663  | -1.12 | 0.000392 | 0.00341  | ENSMUSG0000008721 | Gm13376     | lincRNA      | 21097099 | 21120659 | inside       | 14470   | 8759   | shortestDistance |
| chr2 | 21141207 | 21142279 | 1073 | -1.33 | 1.87E-05 | 0.00028  | ENSMUSG0000008682 | Gm13377     | unprocessed  | 21044808 | 21141954 | overlapStart | 211     | 325    | shortestDistance |
| chr2 | 21182779 | 21183262 | 484  | 2.05  | 1.28E-07 | 4.09E-06 | ENSMUSG0000002667 | Enkur       | protein_codi | 21180731 | 21205365 | inside       | 22345   | 2048   | shortestDistance |
| chr2 | 21222618 | 21223450 | 833  | -0.84 | 0.00552  | 0.0269   | ENSMUSG0000004855 | Thns1       | protein_codi | 21205724 | 21215009 | downstream   | 17310   | 7609   | shortestDistance |
| chr2 | 21261611 | 21261990 | 380  | -0.79 | 0.0118   | 0.0481   | ENSMUSG0000008407 | Gm13378     | processed_p  | 21244105 | 21244440 | downstream   | 17695   | 17171  | shortestDistance |
| chr2 | 21269815 | 21270754 | 940  | -1.15 | 0.00116  | 0.00804  | ENSMUSG0000008407 | Gm13378     | processed_p  | 21244105 | 21244440 | downstream   | 26179   | 25375  | shortestDistance |
| chr2 | 21280729 | 21281339 | 611  | -1.11 | 0.00135  | 0.00905  | ENSMUSG0000008407 | Gm13378     | processed_p  | 21244105 | 21244440 | downstream   | 36929   | 36289  | shortestDistance |
| chr2 | 21927523 | 21927957 | 435  | -1.36 | 0.000354 | 0.00314  | ENSMUSG0000004596 | Gpr158      | protein_codi | 21367542 | 21830547 | downstream   | 560198  | 96976  | shortestDistance |
| chr2 | 21958376 | 21958831 | 456  | -1.13 | 0.000241 | 0.00229  | ENSMUSG0000008146 | Gm13337     | processed_p  | 22067826 | 22069419 | upstream     | -109222 | 108995 | shortestDistance |
| chr2 | 21963739 | 21964584 | 846  | -1.23 | 0.000825 | 0.00613  | ENSMUSG0000008146 | Gm13337     | processed_p  | 22067826 | 22069419 | upstream     | -103664 | 103242 | shortestDistance |
| chr2 | 21976210 | 21976695 | 486  | -2.24 | 7.41E-06 | 0.000128 | ENSMUSG0000008146 | Gm13337     | processed_p  | 22067826 | 22069419 | upstream     | -91374  | 91131  | shortestDistance |
| chr2 | 22028592 | 22028945 | 354  | -1.27 | 0.00316  | 0.0175   | ENSMUSG0000008146 | Gm13337     | processed_p  | 22067826 | 22069419 | upstream     | -39058  | 38881  | shortestDistance |
| chr2 | 22227236 | 22227689 | 454  | -2.06 | 1.86E-06 | 3.96E-05 | ENSMUSG0000002571 | Myo3a       | protein_codi | 22227503 | 22618252 | overlapStart | -41     | 186    | shortestDistance |
| chr2 | 22383838 | 22383917 | 520  | -1.9  | 1.01E-06 | 2.37E-05 | ENSMUSG0000002571 | Myo3a       | protein_codi | 22227503 | 22618252 | inside       | 111155  | 110895 | shortestDistance |
| chr2 | 22589410 | 22589916 | 507  | -1.48 | 0.000837 | 0.0062   | ENSMUSG0000008356 | Gm13340     | unprocessed  | 22588103 | 22589647 | overlapStart | -16     | 237    | shortestDistance |
| chr2 | 22621826 | 22622801 | 976  | -1.33 | 0.000438 | 0.00372  | ENSMUSG0000002678 | Ga2d        | protein_codi | 22622205 | 22693874 | overlapStart | 109     | 379    | shortestDistance |
| chr2 | 22721501 | 22722225 | 722  | -0.99 | 0.00151  | 0.00984  | ENSMUSG0000008345 | Gm13338     | processed_p  | 22713511 | 22713871 | downstream   | 8352    | 7630   | shortestDistance |
| chr2 | 22744838 | 22745171 | 334  | -0.9  | 0.00984  | 0.042    | ENSMUSG0000008535 | 1700992C17f | lincRNA      | 22755984 | 22762273 | upstream     | -10980  | 10813  | shortestDistance |
| chr2 | 22783880 | 22784707 | 828  | -1.25 | 5.74E-05 | 0.000709 | ENSMUSG0000002678 | Appb1p      | protein_codi | 22774094 | 22875653 | inside       | 10200   | 9786   | shortestDistance |
| chr2 | 22784876 | 22785118 | 243  | -1.77 | 1.97E-05 | 0.000291 | ENSMUSG0000002678 | Appb1p      | protein_codi | 22774094 | 22875653 | inside       | 10903   | 10782  | shortestDistance |
| chr2 | 22805578 | 22805954 | 377  | -0.88 | 0.00583  | 0.0281   | ENSMUSG0000002678 | Appb1p      | protein_codi | 22774094 | 22875653 | inside       | 31672   | 31484  | shortestDistance |
| chr2 | 22810859 | 22811246 | 38   |       |          |          |                   |             |              |          |          |              |         |        |                  |





|      |          |          |      |       |          |          |                    |          |              |          |          |              |         |        |                  |
|------|----------|----------|------|-------|----------|----------|--------------------|----------|--------------|----------|----------|--------------|---------|--------|------------------|
| chr2 | 60978608 | 60979424 | 817  | -1.26 | 0.00203  | 0.0125   | ENSMUSG0000007532  | Gm13582  | lincRNA      | 60964376 | 60975151 | upstream     | -3865   | 3457   | shortestDistance |
| chr2 | 61028400 | 61028989 | 590  | 3.6   | 6.40E-13 | 1.27E-10 | ENSMUSG0000008333  | Gm13579  | processed_p  | 61030351 | 61030970 | downstream   | 2276    | 1362   | shortestDistance |
| chr2 | 61136868 | 61137905 | 1038 | 0.86  | 0.0104   | 0.0437   | ENSMUSG0000008319  | Gm13581  | processed_p  | 61224792 | 61225082 | upstream     | -87406  | 86887  | shortestDistance |
| chr2 | 61295673 | 61295961 | 289  | 1.93  | 0.000554 | 0.00448  | ENSMUSG0000007746  | Gm26422  | snoRNA       | 61280278 | 61280409 | downstream   | 15539   | 15264  | shortestDistance |
| chr2 | 61379186 | 61379470 | 285  | -1.13 | 0.004    | 0.021    | ENSMUSG0000007746  | Gm26422  | snoRNA       | 61280278 | 61280409 | downstream   | 99050   | 98777  | shortestDistance |
| chr2 | 61386980 | 61387351 | 372  | -1.03 | 0.00479  | 0.0241   | ENSMUSG0000008834  | Gm22338  | snoRNA       | 61492766 | 61492894 | upstream     | -105600 | 105415 | shortestDistance |
| chr2 | 61638209 | 61638570 | 362  | -2.17 | 1.63E-06 | 3.53E-05 | ENSMUSG0000006428  | Tank     | protein_codi | 61578585 | 61654171 | inside       | 59805   | 15601  | shortestDistance |
| chr2 | 61681200 | 61682001 | 382  | 0.9   | 0.00734  | 0.0335   | ENSMUSG0000008195  | Gm13626  | processed_p  | 61706893 | 61707591 | downstream   | 25781   | 24892  | shortestDistance |
| chr2 | 61803443 | 61803980 | 538  | -0.79 | 0.0118   | 0.0481   | ENSMUSG0000003503  | Tbr1     | protein_codi | 61802930 | 61814114 | inside       | 782     | 513    | shortestDistance |
| chr2 | 61820132 | 61820566 | 435  | -1.1  | 0.00534  | 0.0262   | ENSMUSG0000003503  | Tbr1     | protein_codi | 61802930 | 61814114 | downstream   | 17419   | 6018   | shortestDistance |
| chr2 | 62047327 | 62048117 | 791  | -1.13 | 0.00162  | 0.0104   | ENSMUSG0000002690  | Slc4a10  | protein_codi | 62046462 | 62326730 | inside       | 1260    | 865    | shortestDistance |
| chr2 | 62134770 | 62135303 | 534  | -1.75 | 0.000125 | 0.00134  | ENSMUSG0000002690  | Slc4a10  | protein_codi | 62046462 | 62326730 | inside       | 88574   | 88308  | shortestDistance |
| chr2 | 62498914 | 62499348 | 435  | -1    | 0.011    | 0.0455   | ENSMUSG0000000039  | Fap      | protein_codi | 62500943 | 62574075 | downstream   | 74944   | 1595   | shortestDistance |
| chr2 | 62499557 | 62499909 | 353  | -1.44 | 0.000793 | 0.00594  | ENSMUSG0000000039  | Fap      | protein_codi | 62500943 | 62574075 | downstream   | 74342   | 1034   | shortestDistance |
| chr2 | 62564703 | 62565132 | 430  | -1.14 | 0.000599 | 0.00476  | ENSMUSG0000000039  | Fap      | protein_codi | 62500943 | 62574075 | inside       | 9157    | 8943   | shortestDistance |
| chr2 | 62574739 | 62575507 | 769  | -1    | 0.00291  | 0.0164   | ENSMUSG0000000039  | Fap      | protein_codi | 62500943 | 62574075 | upstream     | -1048   | 664    | shortestDistance |
| chr2 | 62606229 | 62606747 | 519  | -1.07 | 0.00989  | 0.0421   | ENSMUSG0000002688  | Ifih1    | protein_codi | 62595798 | 62646255 | inside       | 39767   | 10431  | shortestDistance |
| chr2 | 62639114 | 62640195 | 482  | -1.24 | 0.000149 | 0.00155  | ENSMUSG0000002688  | Ifih1    | protein_codi | 62595798 | 62646255 | inside       | 6301    | 6060   | shortestDistance |
| chr2 | 62672785 | 62673354 | 570  | 2.77  | 1.72E-11 | 2.11E-09 | ENSMUSG0000002688  | Gca      | protein_codi | 62664285 | 62694109 | inside       | 8785    | 8500   | shortestDistance |
| chr2 | 62681760 | 62681996 | 237  | -1.08 | 0.00222  | 0.0134   | ENSMUSG0000002688  | Gca      | protein_codi | 62664285 | 62694109 | inside       | 17593   | 1213   | shortestDistance |
| chr2 | 62685069 | 62685796 | 728  | -0.84 | 0.00896  | 0.039    | ENSMUSG0000002688  | Gca      | protein_codi | 62664285 | 62694109 | inside       | 21147   | 8313   | shortestDistance |
| chr2 | 62706374 | 62706905 | 532  | 3.69  | 3.22E-17 | 4.57E-14 | ENSMUSG00000005974 | Kcnh7    | protein_codi | 62693414 | 63184287 | inside       | 477647  | 12960  | shortestDistance |
| chr2 | 62730592 | 62730944 | 353  | 1.46  | 0.000739 | 0.00561  | ENSMUSG00000005974 | Kcnh7    | protein_codi | 62693414 | 63184287 | inside       | 453519  | 37178  | shortestDistance |
| chr2 | 62745985 | 62746786 | 802  | 3.03  | 9.48E-12 | 1.27E-09 | ENSMUSG00000005974 | Kcnh7    | protein_codi | 62693414 | 63184287 | inside       | 437901  | 52571  | shortestDistance |
| chr2 | 62734392 | 62734781 | 390  | -1.01 | 0.00691  | 0.032    | ENSMUSG00000005974 | Kcnh7    | protein_codi | 62693414 | 63184287 | upstream     | -50299  | 50105  | shortestDistance |
| chr2 | 64120454 | 64121128 | 675  | -1.21 | 0.0014   | 0.00932  | ENSMUSG0000007532  | Fign     | protein_codi | 63971507 | 64098038 | upstream     | -22753  | 22416  | shortestDistance |
| chr2 | 64458215 | 64458614 | 400  | -1.02 | 0.00614  | 0.0292   | ENSMUSG0000008212  | Gm13577  | processed_p  | 64474745 | 64474949 | downstream   | 16535   | 16131  | shortestDistance |
| chr2 | 64536111 | 64536366 | 256  | -1.94 | 3.97E-05 | 0.000523 | ENSMUSG0000008106  | Gm13576  | processed_p  | 64569863 | 64570640 | downstream   | 34402   | 33497  | shortestDistance |
| chr2 | 64948807 | 64949139 | 333  | -1.18 | 0.000556 | 0.00449  | ENSMUSG0000002688  | Grb14    | protein_codi | 64912476 | 65024987 | inside       | 76014   | 3631   | shortestDistance |
| chr2 | 64965312 | 64965838 | 727  | -0.97 | 0.00398  | 0.0209   | ENSMUSG0000002688  | Grb14    | protein_codi | 64912476 | 65024987 | inside       | 59412   | 52836  | shortestDistance |
| chr2 | 65010145 | 65010911 | 567  | -1.17 | 0.00204  | 0.0125   | ENSMUSG0000002688  | Grb14    | protein_codi | 64912476 | 65024987 | inside       | 14459   | 14076  | shortestDistance |
| chr2 | 65101184 | 65101883 | 700  | 3.43  | 6.92E-16 | 4.60E-13 | ENSMUSG0000000349C | Cobl1    | protein_codi | 65088339 | 65239403 | inside       | 137869  | 12845  | shortestDistance |
| chr2 | 65120148 | 65120537 | 390  | 1.82  | 3.50E-06 | 6.77E-05 | ENSMUSG0000000349C | Cobl1    | protein_codi | 65088339 | 65239403 | inside       | 119061  | 31809  | shortestDistance |
| chr2 | 65121499 | 65121750 | 252  | 1     | 0.0115   | 0.0472   | ENSMUSG0000000349C | Cobl1    | protein_codi | 65088339 | 65239403 | inside       | 117779  | 33160  | shortestDistance |
| chr2 | 65247244 | 65247515 | 272  | -1.32 | 0.00258  | 0.0149   | ENSMUSG0000000688  | Gm13594  | antisense_RI | 65238756 | 65239675 | downstream   | 8624    | 7569   | shortestDistance |
| chr2 | 65297382 | 65297809 | 428  | -1.21 | 0.00542  | 0.0265   | ENSMUSG0000000876  | Gm13593  | processed_p  | 65296178 | 65297369 | upstream     | -1227   | 13     | shortestDistance |
| chr2 | 65353293 | 65353534 | 242  | -1.32 | 0.00157  | 0.0102   | ENSMUSG00000006117 | Slc38a11 | protein_codi | 65316430 | 65364034 | inside       | 10620   | 10500  | shortestDistance |
| chr2 | 65363782 | 65364431 | 650  | -1.28 | 0.000142 | 0.00149  | ENSMUSG0000009918  | Mir6337  | miRNA        | 65364296 | 65364400 | includeFeatu | 294     | 31     | shortestDistance |
| chr2 | 65391310 | 65391711 | 402  | 0.94  | 0.00863  | 0.0379   | ENSMUSG00000008819 | Gm24138  | snoRNA       | 65376169 | 65376282 | upstream     | -15228  | 15028  | shortestDistance |
| chr2 | 65396127 | 65396470 | 344  | -0.99 | 0.00683  | 0.0317   | ENSMUSG00000008819 | Gm24138  | snoRNA       | 65376169 | 65376282 | upstream     | -20016  | 19845  | shortestDistance |
| chr2 | 65414861 | 65415340 | 480  | -1.2  | 0.000594 | 0.00473  | ENSMUSG00000008819 | Gm24138  | snoRNA       | 65376169 | 65376282 | upstream     | -38818  | 38579  | shortestDistance |
| chr2 | 65503983 | 65504326 | 344  | -1.34 | 0.00601  | 0.0287   | ENSMUSG0000005718  | Scn3a    | protein_codi | 65457118 | 65567627 | inside       | 63473   | 46865  | shortestDistance |
| chr2 | 65550588 | 65551109 | 522  | -0.82 | 0.012    | 0.0489   | ENSMUSG0000005718  | Scn3a    | protein_codi | 65457118 | 65567627 | inside       | 16779   | 16518  | shortestDistance |
| chr2 | 65668235 | 65668997 | 763  | -1.18 | 0.000862 | 0.00634  | ENSMUSG0000007531  | Scn2a    | protein_codi | 65620771 | 65767447 | inside       | 47845   | 47464  | shortestDistance |
| chr2 | 65669622 | 65669885 | 264  | -2.71 | 3.59E-10 | 2.69E-08 | ENSMUSG0000007531  | Scn2a    | protein_codi | 65620771 | 65767447 | inside       | 48983   | 48851  | shortestDistance |
| chr2 | 65793641 | 65793996 | 356  | -0.96 | 0.0075   | 0.0341   | ENSMUSG0000007531  | Scn2a    | protein_codi | 65620771 | 65767447 | downstream   | 173047  | 26194  | shortestDistance |
| chr2 | 65818190 | 65818835 | 646  | -1.12 | 0.000853 | 0.00629  | ENSMUSG0000004464  | Csrnp3   | protein_codi | 65845767 | 66031546 | upstream     | -27255  | 26932  | shortestDistance |
| chr2 | 65846382 | 65846804 | 423  | -1.35 | 0.000688 | 0.00532  | ENSMUSG0000004464  | Csrnp3   | protein_codi | 65845767 | 66031546 | inside       | 826     | 615    | shortestDistance |
| chr2 | 65902757 | 65903049 | 293  | -1.49 | 0.000578 | 0.00463  | ENSMUSG0000004464  | Csrnp3   | protein_codi | 65845767 | 66031546 | inside       | 57136   | 56990  | shortestDistance |
| chr2 | 65931581 | 65932387 | 807  | -1.18 | 0.00354  | 0.019    | ENSMUSG0000004464  | Csrnp3   | protein_codi | 65845767 | 66031546 | inside       | 86217   | 85814  | shortestDistance |
| chr2 | 65955774 | 65956366 | 593  | -1.92 | 3.51E-06 | 6.79E-05 | ENSMUSG0000004464  | Csrnp3   | protein_codi | 65845767 | 66031546 | inside       | 110303  | 75180  | shortestDistance |
| chr2 | 65981313 | 65982374 | 1062 | -2.25 | 9.14E-11 | 8.57E-09 | ENSMUSG0000004464  | Csrnp3   | protein_codi | 65845767 | 66031546 | inside       | 136077  | 49172  | shortestDistance |
| chr2 | 65990171 | 65990460 | 290  | -1.75 | 5.67E-06 | 0.000102 | ENSMUSG0000004464  | Csrnp3   | protein_codi | 65845767 | 66031546 | inside       | 144549  | 41086  | shortestDistance |
| chr2 | 66042147 | 66042495 | 322  | -1.47 | 0.000155 | 0.00016  | ENSMUSG0000004464  | Csrnp3   | protein_codi | 65845767 | 66031546 | downstream   | 196567  | 10628  | shortestDistance |
| chr2 | 66191407 | 66192655 | 1249 | -1.21 | 0.000984 | 0.00704  | ENSMUSG00000008667 | Gm13618  | antisense_RI | 66187836 | 66192813 | inside       | 4195    | 158    | shortestDistance |
| chr2 | 66200209 | 66200725 | 517  | 2.31  | 1.34E-09 | 8.25E-08 | ENSMUSG0000003484  | Tc121b   | protein_codi | 66184327 | 66256617 | inside       | 56150   | 15882  | shortestDistance |
| chr2 | 66209908 | 66210238 | 331  | 2.14  | 1.82E-06 | 3.90E-05 | ENSMUSG0000003484  | Tc121b   | protein_codi | 66184327 | 66256617 | inside       | 46544   | 25581  | shortestDistance |
| chr2 | 66213575 | 66214400 | 826  | -1.56 | 8.04E-05 | 0.00093  | ENSMUSG0000003484  | Tc121b   | protein_codi | 66184327 | 66256617 | inside       | 42629   | 29248  | shortestDistance |
| chr2 | 66340638 | 66341035 | 398  | -1.85 | 9.19E-05 | 0.00104  | ENSMUSG0000006432  | Scn1a    | protein_codi | 66270778 | 66440840 | inside       | 100004  | 69860  | shortestDistance |
| chr2 | 66383746 | 66384247 | 502  | -2.3  | 2.33E-09 | 1.34E-07 | ENSMUSG0000006432  | Scn1a    | protein_codi | 66270778 | 66440840 | inside       | 56844   | 56593  | shortestDistance |
| chr2 | 66408656 | 66409047 | 392  | -1.34 | 0.00029  | 0.00267  | ENSMUSG0000006432  | Scn1a    | protein_codi | 66270778 | 66440840 | inside       | 31988   | 31793  | shortestDistance |
| chr2 | 66409111 | 66409457 | 347  | -1.06 | 0.00467  | 0.0236   | ENSMUSG0000006432  | Scn1a    | protein_codi | 66270778 | 66440840 | inside       | 31556   | 31383  | shortestDistance |
| chr2 | 66634583 | 66635149 | 567  | -1.19 | 0.000685 | 0.0053   | ENSMUSG0000007531  | Scn9a    | protein_codi | 66480080 | 66634962 | overlapStart | 96      | 187    | shortestDistance |
| chr2 | 66644246 | 66644737 | 492  | -1.2  | 0.000758 | 0.00573  | ENSMUSG0000007531  | Scn9a    | protein_codi | 66480080 | 66634962 | upstream     | -9530   | 9284   | shortestDistance |
| chr2 | 66799749 | 66800250 | 502  | -1.09 | 0.00227  | 0.0136   | ENSMUSG0000003481  | Scn7a    | protein_codi | 66673425 | 66784914 | upstream     | -15086  | 14835  | shortestDistance |
| chr2 | 66819944 | 66820373 | 430  | -2.01 | 7.13E-06 | 0.000124 | ENSMUSG0000003481  | Scn7a    | protein_codi | 66673425 | 66784914 | upstream     | -35244  | 35030  | shortestDistance |
| chr2 | 67226359 | 67226704 | 346  | -1.91 | 0.000138 | 0.00146  | ENSMUSG0000008690  | Gm13598  | lincRNA      | 67157646 | 67194735 | upstream     | -31797  | 31624  | shortestDistance |
| chr2 | 67460948 | 67461282 | 335  | -2.11 | 0.000895 | 0.00653  | ENSMUSG0000002702  | Xirp2    | protein_codi | 67446002 | 67526614 | inside       | 15113   | 14946  | shortestDistance |
| chr2 | 67529524 | 67530021 | 498  | -1.73 | 5.24E-05 | 0.000657 | ENSMUSG0000002702  | Xirp2    | protein_codi | 67446002 | 67526614 | downstream   | 83770   | 2910   | shortestDistance |
| chr2 | 67535440 | 67535683 | 244  | -2.23 | 4.72E-05 | 0.000602 | ENSMUSG0000002702  | Xirp2    | protein_codi | 67446002 | 67526614 | downstream   | 89560   | 8826   | shortestDistance |
| chr2 | 67565176 | 67565576 | 1401 | -1.23 | 0.00164  | 0.0105   | ENSMUSG0000003478  | B3galt1  | protein_codi | 67565871 | 6        |              |         |        |                  |

|      |           |          |     |       |          |          |                   |             |              |          |          |              |        |        |                  |
|------|-----------|----------|-----|-------|----------|----------|-------------------|-------------|--------------|----------|----------|--------------|--------|--------|------------------|
| chr2 | 70622126  | 70622812 | 687 | 2.74  | 1.07E-09 | 6.89E-08 | ENSMUSG0000008669 | Gm16510     | processed_p  | 70618628 | 70618876 | upstream     | -3593  | 3250   | shortestDistance |
| chr2 | 70877163  | 70878053 | 891 | 2.47  | 4.05E-08 | 1.54E-06 | ENSMUSG0000008586 | Gm13632     | lincRNA      | 70877829 | 70884408 | overlapStart | -221   | 224    | shortestDistance |
| chr2 | 70885559  | 70886103 | 545 | 0.94  | 0.00379  | 0.0201   | ENSMUSG0000008586 | Gm13632     | lincRNA      | 70877829 | 70884408 | downstream   | 8002   | 1151   | shortestDistance |
| chr2 | 71026822  | 71027315 | 494 | 1.65  | 8.78E-05 | 0.000999 | ENSMUSG0000004197 | Mettl8      | protein_codi | 70964561 | 71055583 | inside       | 28515  | 28268  | shortestDistance |
| chr2 | 71273880  | 71274653 | 774 | 1.59  | 4.92E-06 | 9.07E-05 | ENSMUSG0000002701 | Slc25a12    | protein_codi | 71271063 | 71367749 | inside       | 93483  | 2817   | shortestDistance |
| chr2 | 71389927  | 71390271 | 345 | 1     | 0.00381  | 0.0202   | ENSMUSG0000002701 | Hat1        | protein_codi | 71388958 | 71441622 | inside       | 1141   | 969    | shortestDistance |
| chr2 | 71499769  | 71500277 | 509 | 4.44  | 1.25E-16 | 1.28E-13 | ENSMUSG0000004192 | Metap1d     | protein_codi | 71453276 | 71525194 | inside       | 46747  | 24917  | shortestDistance |
| chr2 | 71594520  | 71594907 | 388 | 1.05  | 0.00745  | 0.0339   | ENSMUSG0000002339 | Dlx2        | protein_codi | 71543408 | 71546754 | upstream     | -47960 | 47766  | shortestDistance |
| chr2 | 71643905  | 71644467 | 563 | 1.03  | 0.00228  | 0.0136   | ENSMUSG0000006426 | Platr26     | lincRNA      | 71719417 | 71730966 | upstream     | -75231 | 74950  | shortestDistance |
| chr2 | 71655482  | 71656214 | 667 | 1.14  | 0.00088  | 0.00644  | ENSMUSG0000006426 | Platr26     | lincRNA      | 71719417 | 71730966 | upstream     | -63536 | 74950  | shortestDistance |
| chr2 | 71661468  | 71661843 | 376 | 1.09  | 0.00192  | 0.0119   | ENSMUSG0000006426 | Platr26     | lincRNA      | 71719417 | 71730966 | upstream     | -57761 | 75754  | shortestDistance |
| chr2 | 71722902  | 71723427 | 526 | 2.32  | 7.03E-07 | 1.74E-05 | ENSMUSG0000006426 | Platr26     | lincRNA      | 71719417 | 71730966 | inside       | 3747   | 3485   | shortestDistance |
| chr2 | 71757162  | 71757682 | 521 | 1.21  | 0.00388  | 0.0205   | ENSMUSG0000008479 | Gm13662     | processed_tr | 71749925 | 71759801 | inside       | 7497   | 2119   | shortestDistance |
| chr2 | 71924044  | 71924337 | 294 | 1.44  | 0.00757  | 0.0343   | ENSMUSG0000006649 | Pdk1        | protein_codi | 71873224 | 71903858 | downstream   | 50966  | 20186  | shortestDistance |
| chr2 | 72077874  | 72078623 | 750 | 2.91  | 3.20E-10 | 2.43E-08 | ENSMUSG0000004904 | Rapgef4     | protein_codi | 71981240 | 72257474 | inside       | 97008  | 96634  | shortestDistance |
| chr2 | 72125879  | 72126368 | 490 | -1.09 | 0.00755  | 0.0342   | ENSMUSG0000008543 | Rapgef4os1  | antisense_RI | 72097603 | 72148796 | inside       | 22672  | 22428  | shortestDistance |
| chr2 | 72155193  | 72155442 | 250 | -2.46 | 1.20E-05 | 0.000193 | ENSMUSG0000004904 | Rapgef4     | protein_codi | 71981240 | 72257474 | inside       | 174078 | 102032 | shortestDistance |
| chr2 | 72196176  | 72196943 | 768 | 1.2   | 0.0068   | 0.0316   | ENSMUSG0000004904 | Rapgef4     | protein_codi | 71981240 | 72257474 | inside       | 215320 | 60531  | shortestDistance |
| chr2 | 72301540  | 72301961 | 422 | 1.65  | 1.64E-05 | 0.00025  | ENSMUSG0000004904 | Rapgef4     | protein_codi | 71981240 | 72257474 | inside       | 220510 | 55513  | shortestDistance |
| chr2 | 72305096  | 72306184 | 589 | 1.97  | 3.27E-07 | 9.16E-06 | ENSMUSG0000004904 | Rapgef4     | protein_codi | 71981240 | 72257474 | downstream   | 279650 | 3122   | shortestDistance |
| chr2 | 723292641 | 72329849 | 309 | -1.52 | 0.00246  | 0.0144   | ENSMUSG0000000408 | Map3k20     | protein_codi | 72285637 | 72442610 | inside       | 7158   | 7004   | shortestDistance |
| chr2 | 72301226  | 72301868 | 643 | 2.21  | 9.49E-07 | 2.25E-05 | ENSMUSG0000000408 | Map3k20     | protein_codi | 72285637 | 72442610 | inside       | 15910  | 15589  | shortestDistance |
| chr2 | 72333215  | 72333577 | 363 | 2.52  | 1.06E-08 | 4.94E-07 | ENSMUSG0000000408 | Map3k20     | protein_codi | 72285637 | 72442610 | inside       | 47759  | 47578  | shortestDistance |
| chr2 | 72366516  | 72366927 | 412 | 1.84  | 9.41E-07 | 2.23E-05 | ENSMUSG0000000408 | Map3k20     | protein_codi | 72285637 | 72442610 | inside       | 81085  | 75683  | shortestDistance |
| chr2 | 72369087  | 72369607 | 521 | 1.08  | 0.00246  | 0.0144   | ENSMUSG0000000408 | Map3k20     | protein_codi | 72285637 | 72442610 | inside       | 83710  | 73003  | shortestDistance |
| chr2 | 72442802  | 72443169 | 368 | 1.66  | 0.000183 | 0.00183  | ENSMUSG0000000408 | Map3k20     | protein_codi | 72285637 | 72442610 | downstream   | 157349 | 192    | shortestDistance |
| chr2 | 73037290  | 73037911 | 622 | 3.98  | 2.36E-14 | 8.27E-12 | ENSMUSG0000006371 | Sp3os       | antisense_RI | 72979424 | 72988677 | downstream   | 58176  | 48613  | shortestDistance |
| chr2 | 73038345  | 73038815 | 471 | 4.01  | 2.18E-14 | 7.79E-12 | ENSMUSG0000006371 | Sp3os       | antisense_RI | 72979424 | 72988677 | downstream   | 59156  | 49668  | shortestDistance |
| chr2 | 73056093  | 73056453 | 361 | 1.51  | 2.34E-05 | 0.000337 | ENSMUSG0000002710 | Ola1        | protein_codi | 73092801 | 73218924 | downstream   | 162651 | 36348  | shortestDistance |
| chr2 | 73160721  | 73161259 | 539 | 1.01  | 0.00529  | 0.026    | ENSMUSG0000002710 | Ola1        | protein_codi | 73092801 | 73218924 | inside       | 57934  | 57665  | shortestDistance |
| chr2 | 73371634  | 73371895 | 262 | 2.29  | 8.32E-06 | 0.000141 | ENSMUSG0000008654 | Gm13709     | antisense_RI | 73370909 | 73379297 | inside       | 855    | 725    | shortestDistance |
| chr2 | 73396848  | 73397284 | 437 | 3.03  | 8.94E-11 | 8.42E-09 | ENSMUSG0000008717 | D230022107f | processed_tr | 73386970 | 73420498 | inside       | 10096  | 9878   | shortestDistance |
| chr2 | 73462792  | 73463295 | 504 | 1.22  | 0.00216  | 0.013    | ENSMUSG0000008606 | Gm13708     | lincRNA      | 73459705 | 73477602 | inside       | 3339   | 3087   | shortestDistance |
| chr2 | 73463819  | 73464188 | 370 | 1.5   | 0.000261 | 0.00245  | ENSMUSG0000008606 | Gm13708     | lincRNA      | 73459705 | 73477602 | inside       | 4299   | 4114   | shortestDistance |
| chr2 | 73475470  | 73476123 | 654 | 1.43  | 0.000769 | 0.0058   | ENSMUSG0000008606 | Gm13708     | lincRNA      | 73459705 | 73477602 | inside       | 16091  | 1479   | shortestDistance |
| chr2 | 73509329  | 73509894 | 566 | 1.41  | 0.000131 | 0.0014   | ENSMUSG0000007528 | Wip1f       | protein_codi | 73429610 | 73529734 | inside       | 20122  | 19840  | shortestDistance |
| chr2 | 73612405  | 73612884 | 480 | 2.6   | 8.82E-09 | 4.19E-07 | ENSMUSG0000008654 | Chn1os3     | antisense_RI | 73596526 | 73616012 | inside       | 16118  | 3128   | shortestDistance |
| chr2 | 73925082  | 73925532 | 451 | -1.43 | 4.66E-05 | 0.000596 | ENSMUSG0000001877 | Atpsg3      | protein_codi | 73908447 | 73911326 | upstream     | -13981 | 13756  | shortestDistance |
| chr2 | 74224945  | 74225243 | 299 | -1.61 | 0.000336 | 0.00301  | ENSMUSG0000008043 | 493044116f  | lincRNA      | 74298940 | 74307717 | downstream   | 82623  | 73697  | shortestDistance |
| chr2 | 74609293  | 74609824 | 532 | 1.01  | 6.93E-07 | 1.72E-05 | ENSMUSG0000006523 | Gm22975     | snRNA        | 74624642 | 74624748 | upstream     | -15084 | 14818  | shortestDistance |
| chr2 | 74724339  | 74724573 | 235 | -1.33 | 0.00322  | 0.0178   | ENSMUSG00000117   | Hoxd4       | protein_codi | 74711929 | 74729160 | inside       | 12527  | 4587   | shortestDistance |
| chr2 | 74749221  | 74749691 | 471 | -0.97 | 0.00459  | 0.0233   | ENSMUSG0000007527 | Haglr       | lincRNA      | 74748422 | 74762896 | inside       | 13440  | 799    | shortestDistance |
| chr2 | 74753928  | 74753484 | 387 | -1.37 | 0.000417 | 0.00358  | ENSMUSG0000008451 | Gm14424     | lincRNA      | 74752684 | 74753744 | inside       | 607    | 260    | shortestDistance |
| chr2 | 75019455  | 75019877 | 423 | -1.36 | 0.000239 | 0.00228  | ENSMUSG0000008457 | n-Rs1198    | rRNA         | 74935415 | 74935514 | upstream     | -84152 | 83941  | shortestDistance |
| chr2 | 75054812  | 75055157 | 346 | -1.39 | 0.00298  | 0.0167   | ENSMUSG0000008733 | Gm13652     | lincRNA      | 75124871 | 75137798 | downstream   | 82814  | 69714  | shortestDistance |
| chr2 | 75427966  | 75428592 | 627 | 3.96  | 3.52E-16 | 2.70E-13 | ENSMUSG0000008750 | Gm13658     | lincRNA      | 75436057 | 75444179 | upstream     | -7778  | 7465   | shortestDistance |
| chr2 | 75607433  | 75607948 | 516 | 1.43  | 2.91E-05 | 0.00404  | ENSMUSG0000008416 | Gm13655     | processed_p  | 75632638 | 75633382 | downstream   | 25692  | 24690  | shortestDistance |
| chr2 | 75612952  | 75613580 | 629 | 1.13  | 0.00141  | 0.00936  | ENSMUSG0000008215 | Gm13655     | processed_p  | 75632638 | 75633382 | downstream   | 20116  | 19058  | shortestDistance |
| chr2 | 75685389  | 75685975 | 587 | 1.48  | 4.04E-05 | 0.00053  | ENSMUSG0000001583 | Nfe2l2      | protein_codi | 75675513 | 75704641 | inside       | 18959  | 9876   | shortestDistance |
| chr2 | 75696360  | 75696818 | 459 | 1.2   | 0.000922 | 0.00668  | ENSMUSG0000001583 | Nfe2l2      | protein_codi | 75675513 | 75704641 | inside       | 8052   | 7823   | shortestDistance |
| chr2 | 75716493  | 75716781 | 289 | 3.38  | 4.26E-08 | 1.61E-06 | ENSMUSG0000008422 | E030042020  | processed_tr | 75704770 | 75710024 | downstream   | 11867  | 6469   | shortestDistance |
| chr2 | 75731006  | 75731729 | 724 | 1.62  | 1.18E-05 | 0.00019  | ENSMUSG0000008752 | Gm13656     | lincRNA      | 75729592 | 75730172 | upstream     | -1196  | 834    | shortestDistance |
| chr2 | 75733150  | 75733456 | 307 | 2.86  | 7.64E-10 | 5.17E-08 | ENSMUSG0000008752 | Gm13656     | lincRNA      | 75729592 | 75730172 | upstream     | -3131  | 2978   | shortestDistance |
| chr2 | 75781163  | 75781468 | 306 | 1.38  | 0.000235 | 0.00225  | ENSMUSG0000008681 | Gm13657     | processed_tr | 75777188 | 75782306 | inside       | 4128   | 838    | shortestDistance |
| chr2 | 75781891  | 75782363 | 473 | 4.05  | 2.02E-18 | 4.96E-15 | ENSMUSG0000008681 | Gm13657     | processed_tr | 75777188 | 75782306 | overlapEnd   | 4939   | 57     | shortestDistance |
| chr2 | 75792380  | 75793226 | 847 | 1.01  | 0.00115  | 0.00797  | ENSMUSG0000008681 | Gm13657     | processed_tr | 75777188 | 75782306 | downstream   | 15615  | 10074  | shortestDistance |
| chr2 | 75818553  | 75819222 | 670 | 3.53  | 8.00E-13 | 1.52E-10 | ENSMUSG0000008681 | Gm13670     | processed_p  | 75822028 | 75822793 | downstream   | 3905   | 2806   | shortestDistance |
| chr2 | 76084833  | 76085408 | 576 | -1.34 | 5.29E-05 | 0.000662 | ENSMUSG0000007527 | Pde11a      | protein_codi | 75989141 | 76338774 | inside       | 253654 | 95692  | shortestDistance |
| chr2 | 76215197  | 76215650 | 454 | -1.11 | 0.00194  | 0.012    | ENSMUSG0000007527 | Pde11a      | protein_codi | 75989141 | 76338774 | inside       | 123350 | 123124 | shortestDistance |
| chr2 | 76475685  | 76476201 | 517 | -2.46 | 2.84E-08 | 1.15E-06 | ENSMUSG0000004235 | Osbpl6      | protein_codi | 76406508 | 76600647 | inside       | 69435  | 69177  | shortestDistance |
| chr2 | 76541879  | 76542311 | 433 | -0.87 | 0.00909  | 0.0395   | ENSMUSG0000004235 | Osbpl6      | protein_codi | 76406508 | 76600647 | inside       | 135587 | 58336  | shortestDistance |
| chr2 | 76610317  | 76611159 | 843 | 1.56  | 3.02E-06 | 5.98E-05 | ENSMUSG0000004235 | Osbpl6      | protein_codi | 76406508 | 76600647 | downstream   | 204230 | 9670   | shortestDistance |
| chr2 | 76658308  | 76658790 | 483 | -1.33 | 0.000825 | 0.00613  | ENSMUSG0000007526 | Pjvk        | protein_codi | 76648476 | 76658556 | overlapEnd   | 10073  | 234    | shortestDistance |
| chr2 | 76814115  | 76814730 | 616 | -1.05 | 0.0095   | 0.0408   | ENSMUSG0000005174 | Ttn         | protein_codi | 76703980 | 76982547 | inside       | 168125 | 110135 | shortestDistance |
| chr2 | 76926744  | 76927246 | 503 | -1.58 | 2.46E-05 | 0.000351 | ENSMUSG0000005174 | Ttn         | protein_codi | 76703980 | 76982547 | inside       | 55552  | 55301  | shortestDistance |
| chr2 | 76968938  | 76969276 | 339 | -0.89 | 0.00563  | 0.0273   | ENSMUSG0000005174 | Ttn         | protein_codi | 76703980 | 76982547 | inside       | 13440  | 13271  | shortestDistance |
| chr2 | 77061759  | 77062260 | 502 | -1.13 | 0.00135  | 0.00906  | ENSMUSG0000004403 | Cdc41c1     | protein_codi | 77009902 | 77170636 | inside       | 108626 | 51857  | shortestDistance |
| chr2 | 77108563  | 77109137 | 575 | -1.43 | 7.01E-05 | 0.000835 | ENSMUSG0000004403 | Cdc41c1     | protein_codi | 77009902 | 77170636 | inside       | 61786  | 61499  | shortestDistance |
| chr2 | 77264562  | 77265022 | 461 | -0.91 | 0.00411  | 0.0214   | ENSMUSG0000004227 | Sestd1      | protein_codi | 77180340 | 77280592 | inside       | 15800  | 15570  | shortestDistance |
| chr2 | 77309296  | 77309692 | 397 | 0.94  | 0.0051   | 0.0253   | ENSMUSG0000008733 | Gm13943     | lincRNA      | 77314751 | 77317035 | upstream     | -5257  | 5059   | shortestDistance |
| chr2 | 77456645  | 77456948 | 304 | -1.14 | 0.008    |          |                   |             |              |          |          |              |        |        |                  |



|      |           |           |      |       |          |          |                    |            |               |           |           |              |        |        |                  |
|------|-----------|-----------|------|-------|----------|----------|--------------------|------------|---------------|-----------|-----------|--------------|--------|--------|------------------|
| chr2 | 104574097 | 104574420 | 324  | 2.28  | 1.12E-06 | 2.59E-05 | ENSMUSG0000008645  | Plat14     | processed_tr  | 104559163 | 104571429 | downstream   | 15095  | 2668   | shortestDistance |
| chr2 | 104590050 | 104591007 | 958  | 0.8   | 0.0107   | 0.0446   | ENSMUSG0000002717  | Cstf3      | protein_codi  | 104590523 | 104665429 | overlapStart | 5      | 473    | shortestDistance |
| chr2 | 104731928 | 104732655 | 728  | 1.01  | 0.0109   | 0.0452   | ENSMUSG00000002717 | Depdc7     | protein_codi  | 104721784 | 104742878 | inside       | 10586  | 10144  | shortestDistance |
| chr2 | 104864433 | 104864983 | 551  | 2.09  | 1.71E-09 | 1.02E-07 | ENSMUSG00000004510 | Ccdc73     | protein_codi  | 104867805 | 105017904 | upstream     | -3097  | 2822   | shortestDistance |
| chr2 | 105188119 | 105188582 | 464  | 1.9   | 4.49E-07 | 1.20E-05 | ENSMUSG0000001645  | Wt1        | protein_codi  | 105126529 | 105173616 | downstream   | 61821  | 14503  | shortestDistance |
| chr2 | 105198491 | 105198761 | 271  | -1.57 | 0.000711 | 0.00545  | ENSMUSG0000001645  | Wt1        | protein_codi  | 105126529 | 105173616 | downstream   | 72097  | 24875  | shortestDistance |
| chr2 | 105251939 | 105252471 | 533  | -1.54 | 0.000135 | 0.00143  | ENSMUSG0000005531  | Them7      | protein_codi  | 105224320 | 105379796 | inside       | 27885  | 27619  | shortestDistance |
| chr2 | 105389097 | 105389853 | 757  | 1.48  | 2.88E-05 | 4.00E-04 | ENSMUSG0000000597  | Rcn1       | protein_codi  | 105386291 | 105399319 | inside       | 9844   | 2806   | shortestDistance |
| chr2 | 105444136 | 105444393 | 258  | -1.16 | 0.00803  | 0.0359   | ENSMUSG0000008676  | 4930527A07 | lincRNA       | 105476501 | 105477357 | upstream     | -32237 | 32108  | shortestDistance |
| chr2 | 106355916 | 106356365 | 450  | -0.86 | 0.0117   | 0.0477   | ENSMUSG0000007498  | Dcdc5      | transcribed_1 | 106003336 | 106406151 | inside       | 352804 | 49786  | shortestDistance |
| chr2 | 106428617 | 106429216 | 600  | -1.02 | 0.00879  | 0.0385   | ENSMUSG0000007498  | Dcdc5      | transcribed_1 | 106003336 | 106406151 | downstream   | 425580 | 22466  | shortestDistance |
| chr2 | 106546178 | 106546623 | 446  | -1.38 | 0.00142  | 0.00938  | ENSMUSG00000008722 | Gm14015    | lincRNA       | 106463823 | 106523103 | upstream     | -23297 | 23075  | shortestDistance |
| chr2 | 106649733 | 106650751 | 1019 | -0.9  | 0.07073  | 0.0324   | ENSMUSG00000008521 | B8218582   | processed_tr  | 106642914 | 106650364 | overlapStart | 122    | 387    | shortestDistance |
| chr2 | 106693121 | 106693690 | 570  | -0.81 | 0.00684  | 0.0318   | ENSMUSG0000001638  | Mpped2     | protein_codi  | 106693269 | 106688356 | overlapStart | 137    | 148    | shortestDistance |
| chr2 | 106695051 | 106695521 | 507  | -0.99 | 0.00214  | 0.013    | ENSMUSG0000001638  | Mpped2     | protein_codi  | 106693269 | 106688356 | inside       | 1999   | 1746   | shortestDistance |
| chr2 | 106722697 | 106723253 | 557  | -1.46 | 0.000743 | 0.00564  | ENSMUSG0000001638  | Mpped2     | protein_codi  | 106693269 | 106688356 | inside       | 29706  | 29428  | shortestDistance |
| chr2 | 106866309 | 106866671 | 363  | -1.41 | 0.0013   | 0.00879  | ENSMUSG0000001638  | Mpped2     | protein_codi  | 106693269 | 106688356 | inside       | 173221 | 1685   | shortestDistance |
| chr2 | 106935535 | 106936117 | 583  | -1.73 | 0.000134 | 0.00142  | ENSMUSG00000008416 | Gm13902    | processed_p   | 106926565 | 106927169 | upstream     | -8657  | 8366   | shortestDistance |
| chr2 | 107083120 | 107083437 | 318  | -1.1  | 0.00126  | 0.00857  | ENSMUSG00000008940 | Gm24885    | ribozyme      | 107097206 | 107097475 | downstream   | 14197  | 13769  | shortestDistance |
| chr2 | 107175740 | 107176027 | 288  | -1.1  | 0.00285  | 0.0161   | ENSMUSG00000008318 | Gm13903    | unprocessed   | 107123768 | 107123960 | upstream     | -51924 | 51780  | shortestDistance |
| chr2 | 107224691 | 107225059 | 369  | 1.63  | 0.000232 | 0.00222  | ENSMUSG00000004260 | Kcna4      | protein_codi  | 107290639 | 107298502 | upstream     | -65764 | 65580  | shortestDistance |
| chr2 | 107231695 | 107232113 | 419  | -1.51 | 0.00693  | 0.0321   | ENSMUSG00000004260 | Kcna4      | protein_codi  | 107290639 | 107298502 | upstream     | -58735 | 58526  | shortestDistance |
| chr2 | 107869384 | 107869616 | 233  | -1.37 | 0.00432  | 0.0223   | ENSMUSG00000007748 | Gm23439    | snoRNA        | 107886508 | 107886639 | downstream   | 17139  | 16892  | shortestDistance |
| chr2 | 107879662 | 107880100 | 439  | -1.01 | 0.00253  | 0.0148   | ENSMUSG00000007748 | Gm23439    | snoRNA        | 107886508 | 107886639 | downstream   | 6758   | 6408   | shortestDistance |
| chr2 | 107886253 | 107886735 | 483  | -1.3  | 0.000127 | 0.00135  | ENSMUSG00000007748 | Gm23439    | snoRNA        | 107886508 | 107886639 | includeFeatu | 145    | 96     | shortestDistance |
| chr2 | 108593580 | 108593964 | 385  | 1.29  | 0.00046  | 0.00387  | ENSMUSG00000008334 | Gm13913    | processed_p   | 108578130 | 108578389 | upstream     | -15383 | 15191  | shortestDistance |
| chr2 | 108600248 | 108600838 | 591  | -1.43 | 8.25E-05 | 0.000949 | ENSMUSG00000008334 | Gm13913    | processed_p   | 108578130 | 108578389 | upstream     | -22154 | 21859  | shortestDistance |
| chr2 | 108764393 | 108765283 | 891  | -1.73 | 1.34E-07 | 4.27E-06 | ENSMUSG00000008369 | Gm13914    | processed_p   | 108733212 | 108734202 | upstream     | -30636 | 30191  | shortestDistance |
| chr2 | 108877194 | 108877470 | 277  | -1.51 | 0.000488 | 0.00405  | ENSMUSG00000008362 | Rpl35a-ps4 | processed_p   | 108874926 | 108875258 | upstream     | -2074  | 1936   | shortestDistance |
| chr2 | 109220347 | 109220769 | 423  | -1.95 | 9.81E-06 | 0.000162 | ENSMUSG0000000573  | Mettl15    | protein_codi  | 109092297 | 109280748 | inside       | 60190  | 59979  | shortestDistance |
| chr2 | 109320189 | 109320643 | 455  | -1.24 | 0.00172  | 0.011    | ENSMUSG00000002711 | Kif18a     | protein_codi  | 109280738 | 109341747 | inside       | 39678  | 21104  | shortestDistance |
| chr2 | 109388515 | 109389089 | 575  | -1.14 | 0.0115   | 0.047    | ENSMUSG00000002711 | Kif18a     | protein_codi  | 109280738 | 109341747 | downstream   | 108064 | 46768  | shortestDistance |
| chr2 | 109756149 | 109756787 | 639  | -0.8  | 0.0106   | 0.0442   | ENSMUSG00000004848 | Bdnf       | protein_codi  | 109674700 | 109727007 | downstream   | 81768  | 29142  | shortestDistance |
| chr2 | 109932033 | 109932736 | 704  | -1.01 | 0.00144  | 0.00952  | ENSMUSG00000005019 | Igr4       | protein_codi  | 109917647 | 110014257 | inside       | 14737  | 14386  | shortestDistance |
| chr2 | 110172424 | 110172918 | 495  | -1.34 | 0.0081   | 0.0362   | ENSMUSG00000007748 | Cdc34      | protein_codi  | 110017817 | 110173360 | inside       | 154854 | 442    | shortestDistance |
| chr2 | 110229165 | 110230195 | 1031 | -1.03 | 0.00108  | 0.00755  | ENSMUSG00000008454 | Gm13936    | antisense_RI  | 110196889 | 110256131 | inside       | 32791  | 25936  | shortestDistance |
| chr2 | 110302431 | 110303109 | 679  | -1.3  | 0.00107  | 0.0075   | ENSMUSG00000008454 | Gm13936    | protein_codi  | 110262697 | 110314560 | inside       | 11790  | 11451  | shortestDistance |
| chr2 | 110564714 | 110565537 | 824  | -1.24 | 0.000265 | 0.00248  | ENSMUSG00000007917 | Gm10794    | pseudogene    | 110596429 | 110596637 | downstream   | 31511  | 30892  | shortestDistance |
| chr2 | 111058638 | 111058960 | 323  | -1.06 | 0.00486  | 0.0243   | ENSMUSG00000007917 | Gm13942    | lincRNA       | 111051320 | 111057574 | upstream     | -1225  | 1064   | shortestDistance |
| chr2 | 112232572 | 112233236 | 665  | 2.26  | 2.21E-08 | 9.23E-07 | ENSMUSG00000002713 | Lpcat4     | protein_codi  | 112239468 | 112247111 | upstream     | -6564  | 6232   | shortestDistance |
| chr2 | 112391464 | 112391963 | 500  | 2.97  | 3.96E-12 | 5.94E-10 | ENSMUSG00000002713 | Katnb1     | protein_codi  | 112379211 | 112414240 | inside       | 12503  | 12253  | shortestDistance |
| chr2 | 112394004 | 112394319 | 316  | 1.39  | 0.000284 | 0.00262  | ENSMUSG00000002713 | Katnb1     | protein_codi  | 112379211 | 112414240 | inside       | 14951  | 14793  | shortestDistance |
| chr2 | 112433444 | 112433756 | 313  | -1.35 | 0.000771 | 0.00581  | ENSMUSG00000002713 | Katnb1     | protein_codi  | 112379211 | 112414240 | downstream   | 54389  | 19204  | shortestDistance |
| chr2 | 112448037 | 112448419 | 383  | 1.59  | 3.61E-05 | 0.000483 | ENSMUSG00000005594 | Emc7       | protein_codi  | 112454997 | 112472162 | upstream     | -6769  | 6578   | shortestDistance |
| chr2 | 112448506 | 112448898 | 393  | 2.15  | 5.25E-08 | 1.93E-06 | ENSMUSG00000005594 | Emc7       | protein_codi  | 112454997 | 112472162 | upstream     | -6295  | 6099   | shortestDistance |
| chr2 | 112567836 | 112568239 | 404  | -2.94 | 4.10E-10 | 3.00E-08 | ENSMUSG00000003060 | Aven       | protein_codi  | 112492964 | 112634573 | inside       | 75074  | 66334  | shortestDistance |
| chr2 | 112596453 | 112596750 | 298  | 1.64  | 0.00125  | 0.00852  | ENSMUSG00000003060 | Aven       | protein_codi  | 112492964 | 112634573 | inside       | 103638 | 37823  | shortestDistance |
| chr2 | 112675682 | 112677112 | 531  | -1.07 | 0.00184  | 0.0115   | ENSMUSG00000005737 | Ryr3       | protein_codi  | 112631355 | 113217096 | inside       | 540249 | 45227  | shortestDistance |
| chr2 | 112714531 | 112715073 | 543  | -1.41 | 0.000619 | 0.00489  | ENSMUSG00000005737 | Ryr3       | protein_codi  | 112631355 | 113217096 | inside       | 502294 | 83176  | shortestDistance |
| chr2 | 112726861 | 112727499 | 639  | -1.84 | 3.14E-07 | 8.83E-06 | ENSMUSG00000005737 | Ryr3       | protein_codi  | 112631355 | 113217096 | inside       | 489916 | 95506  | shortestDistance |
| chr2 | 112764253 | 112765418 | 1166 | -1.28 | 0.000238 | 0.00227  | ENSMUSG00000005737 | Ryr3       | protein_codi  | 112631355 | 113217096 | inside       | 452260 | 132898 | shortestDistance |
| chr2 | 113169081 | 113169480 | 400  | -1.83 | 8.17E-05 | 0.000942 | ENSMUSG00000005737 | Ryr3       | protein_codi  | 112631355 | 113217096 | inside       | 47816  | 47616  | shortestDistance |
| chr2 | 113327232 | 113328188 | 957  | -0.99 | 0.00363  | 0.0194   | ENSMUSG00000004404 | Fmn1       | protein_codi  | 113327736 | 113716767 | overlapStart | -26    | 452    | shortestDistance |
| chr2 | 113363697 | 113364601 | 905  | -0.98 | 0.00711  | 0.0327   | ENSMUSG00000004404 | Fmn1       | protein_codi  | 113327736 | 113716767 | inside       | 36413  | 35961  | shortestDistance |
| chr2 | 113389676 | 113389921 | 246  | -1.58 | 0.00086  | 0.00633  | ENSMUSG00000008544 | Gm13963    | antisense_RI  | 113387107 | 113441094 | inside       | 51296  | 2569   | shortestDistance |
| chr2 | 113433818 | 113434120 | 303  | -1.47 | 0.00108  | 0.0076   | ENSMUSG00000008544 | Gm13963    | antisense_RI  | 113387107 | 113441094 | inside       | 7125   | 6974   | shortestDistance |
| chr2 | 113539173 | 113539580 | 408  | -1.93 | 1.02E-06 | 2.39E-05 | ENSMUSG00000004404 | Fmn1       | protein_codi  | 113327736 | 113716767 | inside       | 211640 | 17187  | shortestDistance |
| chr2 | 113641040 | 113641459 | 420  | -1.19 | 0.00196  | 0.0121   | ENSMUSG00000004404 | Fmn1       | protein_codi  | 113327736 | 113716767 | inside       | 313514 | 75308  | shortestDistance |
| chr2 | 113674708 | 113675302 | 595  | -1.48 | 4.02E-05 | 0.000527 | ENSMUSG00000004404 | Fmn1       | protein_codi  | 113327736 | 113716767 | inside       | 347269 | 41465  | shortestDistance |
| chr2 | 113870206 | 113870434 | 229  | -1.07 | 0.00832  | 0.0369   | ENSMUSG00000004411 | Ahrpap11a  | protein_codi  | 113831492 | 113848661 | upstream     | -21659 | 21545  | shortestDistance |
| chr2 | 113903175 | 113903491 | 317  | 1.28  | 0.00247  | 0.0145   | ENSMUSG00000009600 | Gm21596    | processed_p   | 113919247 | 113920562 | downstream   | 17229  | 17556  | shortestDistance |
| chr2 | 113903902 | 113904994 | 1093 | 1.1   | 0.000701 | 0.00539  | ENSMUSG00000009600 | Gm21596    | processed_p   | 113919247 | 113920562 | downstream   | 16114  | 14253  | shortestDistance |
| chr2 | 114491561 | 114492376 | 816  | -2.42 | 9.01E-08 | 3.05E-06 | ENSMUSG00000005714 | Dph6       | protein_codi  | 114516416 | 114654964 | downstream   | 162996 | 24040  | shortestDistance |
| chr2 | 114599832 | 114600226 | 395  | -1.07 | 0.00301  | 0.0169   | ENSMUSG00000005714 | Dph6       | protein_codi  | 114516416 | 114654964 | inside       | 54935  | 54738  | shortestDistance |
| chr2 | 114610119 | 114610467 | 349  | -1.99 | 3.10E-07 | 8.72E-06 | ENSMUSG00000005714 | Dph6       | protein_codi  | 114516416 | 114654964 | inside       | 44671  | 44497  | shortestDistance |
| chr2 | 114622355 | 114622855 | 501  | -1.2  | 0.00224  | 0.0134   | ENSMUSG00000005714 | Dph6       | protein_codi  | 114516416 | 114654964 | inside       | 32359  | 32109  | shortestDistance |
| chr2 | 114673081 | 114673365 | 285  | -2.55 | 1.13E-06 | 2.60E-05 | ENSMUSG00000008478 | Gm13972    | processed_tr  | 114654425 | 114697839 | inside       | 18798  | 18656  | shortestDistance |
| chr2 | 114673879 | 114674186 | 308  | -1.52 | 0.00173  | 0.011    | ENSMUSG00000008478 | Gm13972    | processed_tr  | 114654425 | 114697839 | inside       | 19607  | 19454  | shortestDistance |
| chr2 | 114853857 | 114854410 | 554  | -0.99 | 0.00335  | 0.0183   | ENSMUSG00000008522 | Gm13974    | lincRNA       | 114854093 | 115043972 | overlapStart |        |        |                  |





|      |           |           |      |       |          |          |                              |               |            |           |              |         |        |                  |
|------|-----------|-----------|------|-------|----------|----------|------------------------------|---------------|------------|-----------|--------------|---------|--------|------------------|
| chr2 | 140007420 | 140007760 | 341  | 2.65  | 2.75E-07 | 7.90E-06 | ENSMUSG0000003903Tasp1       | protein_codi  | 139833480  | 140066805 | inside       | 59215   | 59045  | shortestDistance |
| chr2 | 140389563 | 140389931 | 369  | -1.51 | 1.94E-05 | 0.000288 | ENSMUSG0000007476Sel1I2      | protein_codi  | 140229855  | 140389706 | overlapStart | -41     | 143    | shortestDistance |
| chr2 | 140497500 | 140498541 | 1042 | -2.41 | 2.49E-11 | 2.86E-09 | ENSMUSG0000006820Macro2      | protein_codi  | 140395309  | 142392966 | inside       | 102711  | 102191 | shortestDistance |
| chr2 | 140668327 | 140668595 | 269  | -1.43 | 0.000106 | 0.00117  | ENSMUSG0000005137Flrt3       | protein_codi  | 140650914  | 140671469 | inside       | 3008    | 2874   | shortestDistance |
| chr2 | 140670455 | 140671753 | 1299 | -1.18 | 0.000359 | 0.00318  | ENSMUSG00000005137Flrt3      | protein_codi  | 140650914  | 140671469 | overlapStart | 365     | 284    | shortestDistance |
| chr2 | 140793856 | 140794576 | 721  | 1.84  | 3.76E-07 | 1.03E-05 | ENSMUSG0000006820Macro2      | protein_codi  | 140395309  | 142392966 | inside       | 398907  | 398547 | shortestDistance |
| chr2 | 140819183 | 140819798 | 616  | -1.18 | 0.0014   | 0.00927  | ENSMUSG0000006820Macro2      | protein_codi  | 140395309  | 142392966 | inside       | 424181  | 423874 | shortestDistance |
| chr2 | 140986653 | 140986995 | 343  | -1.16 | 0.00473  | 0.0238   | ENSMUSG0000006820Macro2      | protein_codi  | 140395309  | 142392966 | inside       | 591515  | 591344 | shortestDistance |
| chr2 | 141274252 | 141274707 | 456  | -1.82 | 4.36E-07 | 1.17E-05 | ENSMUSG0000008645Macro2d0s1  | antisense_RI  | 141230431  | 141286991 | inside       | 12511   | 12284  | shortestDistance |
| chr2 | 141280852 | 141281260 | 409  | -1.02 | 0.0102   | 0.043    | ENSMUSG0000008645Macro2d0s1  | antisense_RI  | 141230431  | 141286991 | inside       | 5935    | 5731   | shortestDistance |
| chr2 | 141834061 | 141834989 | 929  | -1.2  | 0.000285 | 0.00263  | ENSMUSG0000006820Macro2      | protein_codi  | 140395309  | 142392966 | inside       | 1439216 | 557977 | shortestDistance |
| chr2 | 142698859 | 142699627 | 769  | -1.71 | 3.68E-05 | 0.000491 | ENSMUSG0000003884Kif16b      | protein_codi  | 142617474  | 142901531 | inside       | 202288  | 81385  | shortestDistance |
| chr2 | 142797200 | 142797767 | 568  | -1.25 | 0.00333  | 0.0182   | ENSMUSG0000003884Kif16b      | protein_codi  | 142617474  | 142901531 | inside       | 104047  | 103764 | shortestDistance |
| chr2 | 142878850 | 142879086 | 237  | -1.92 | 1.04E-05 | 0.000171 | ENSMUSG0000003884Kif16b      | protein_codi  | 142617474  | 142901531 | inside       | 22563   | 22445  | shortestDistance |
| chr2 | 142924560 | 142924822 | 263  | -1.26 | 0.00176  | 0.0112   | ENSMUSG0000008650Kif16bos    | antisense_RI  | 142902965  | 142903572 | downstream   | 21726   | 20988  | shortestDistance |
| chr2 | 143084834 | 143085315 | 482  | 3.67  | 2.28E-17 | 3.49E-14 | ENSMUSG00000002741Otor       | protein_codi  | 143078473  | 143081713 | downstream   | 6601    | 3121   | shortestDistance |
| chr2 | 143891407 | 143892023 | 617  | 1.98  | 1.80E-06 | 3.85E-05 | ENSMUSG0000008071Gm11686     | processed_p   | 143881177  | 143881509 | downstream   | 10538   | 9898   | shortestDistance |
| chr2 | 143934139 | 143934820 | 682  | 3.11  | 8.16E-13 | 1.55E-10 | ENSMUSG00000002743Dtn        | protein_codi  | 143915320  | 143943324 | inside       | 19160   | 8504   | shortestDistance |
| chr2 | 143940459 | 143940771 | 313  | 2.41  | 1.03E-06 | 2.40E-05 | ENSMUSG0000001593Dtn         | protein_codi  | 143915320  | 143943324 | inside       | 25295   | 2553   | shortestDistance |
| chr2 | 143951615 | 143952302 | 688  | -1.5  | 0.000373 | 0.00327  | ENSMUSG0000002742Rbrp1       | protein_codi  | 143947395  | 144011263 | inside       | 59305   | 4220   | shortestDistance |
| chr2 | 143962150 | 143962689 | 540  | 1.58  | 0.000142 | 0.00149  | ENSMUSG00000002742Rbrp1      | protein_codi  | 143947395  | 144011263 | inside       | 48843   | 14755  | shortestDistance |
| chr2 | 144173326 | 144174114 | 789  | 1.81  | 0.00027  | 0.00252  | ENSMUSG00000007475Gm5535     | lincRNA       | 144098815  | 144207990 | inside       | 34270   | 33876  | shortestDistance |
| chr2 | 144174382 | 144174707 | 326  | 1.14  | 0.00539  | 0.0264   | ENSMUSG0000003875Slc24a3     | lincRNA       | 144098815  | 144207990 | inside       | 33446   | 33283  | shortestDistance |
| chr2 | 144185095 | 144185593 | 499  | 2.1   | 4.59E-08 | 1.71E-06 | ENSMUSG00000007475Gm5535     | lincRNA       | 144098815  | 144207990 | inside       | 22646   | 22397  | shortestDistance |
| chr2 | 144187889 | 144188646 | 758  | 1.28  | 0.000205 | 0.00202  | ENSMUSG00000007475Gm5535     | lincRNA       | 144098815  | 144207990 | inside       | 19722   | 19344  | shortestDistance |
| chr2 | 144237281 | 144237856 | 576  | 2.24  | 4.53E-07 | 1.21E-05 | ENSMUSG00000085124930444E06f | antisense_RI  | 144243241  | 144244849 | upstream     | -5673   | 5385   | shortestDistance |
| chr2 | 144240181 | 144240419 | 239  | -1.39 | 0.0102   | 0.00726  | ENSMUSG00000085124930444E06f | antisense_RI  | 144243241  | 144244849 | upstream     | -2941   | 2822   | shortestDistance |
| chr2 | 144295217 | 144295708 | 492  | -1.66 | 2.74E-05 | 0.000383 | ENSMUSG00000003727Ovo2       | protein_codi  | 144305175  | 144332146 | downstream   | 36684   | 9467   | shortestDistance |
| chr2 | 144330466 | 144332265 | 1800 | -0.88 | 0.00535  | 0.0263   | ENSMUSG00000003727Ovo2       | protein_codi  | 144305175  | 144332146 | overlapStart | 780     | 119    | shortestDistance |
| chr2 | 144441213 | 144441821 | 609  | 3.22  | 7.08E-14 | 2.07E-11 | ENSMUSG000000836727Dtd1-ps   | transcribed_i | 14459280   | 144500267 | upstream     | -17763  | 17459  | shortestDistance |
| chr2 | 144692360 | 144692689 | 330  | 1.08  | 0.00832  | 0.0369   | ENSMUSG00000002743Dtd1       | protein_codi  | 144599897  | 144768758 | inside       | 92627   | 76069  | shortestDistance |
| chr2 | 144720275 | 144720878 | 604  | 2.24  | 1.88E-09 | 1.11E-07 | ENSMUSG00000002743Dtd1       | protein_codi  | 144599897  | 144768758 | inside       | 120679  | 47880  | shortestDistance |
| chr2 | 144729217 | 144730226 | 1010 | 2.86  | 4.92E-11 | 5.10E-09 | ENSMUSG00000002743Dtd1       | protein_codi  | 144599897  | 144768758 | inside       | 129825  | 38532  | shortestDistance |
| chr2 | 144993564 | 144994095 | 532  | -2.47 | 3.04E-07 | 8.61E-06 | ENSMUSG00000008285Gm11746    | processed_p   | 1449330858 | 144931678 | upstream     | -62152  | 61886  | shortestDistance |
| chr2 | 145050479 | 145050768 | 290  | 1.84  | 5.41E-05 | 0.000674 | ENSMUSG000000063875Slc24a3   | protein_codi  | 145167754  | 145642166 | upstream     | -117130 | 116986 | shortestDistance |
| chr2 | 145158905 | 145159319 | 415  | 1.6   | 2.69E-05 | 0.000378 | ENSMUSG000000063875Slc24a3   | protein_codi  | 145167754  | 145642166 | upstream     | -8642   | 8435   | shortestDistance |
| chr2 | 145214044 | 145214605 | 562  | 2.97  | 5.49E-10 | 3.86E-08 | ENSMUSG000000063875Slc24a3   | protein_codi  | 145167754  | 145642166 | inside       | 46570   | 46290  | shortestDistance |
| chr2 | 145246466 | 145246700 | 235  | 1.54  | 0.00342  | 0.0186   | ENSMUSG000000063875Slc24a3   | protein_codi  | 145167754  | 145642166 | inside       | 78829   | 78712  | shortestDistance |
| chr2 | 145269480 | 145269767 | 288  | -1.27 | 0.00114  | 0.00793  | ENSMUSG000000063875Slc24a3   | protein_codi  | 145167754  | 145642166 | inside       | 101870  | 101726 | shortestDistance |
| chr2 | 145405724 | 145406137 | 414  | 1.18  | 0.00249  | 0.0146   | ENSMUSG000000063875Slc24a3   | protein_codi  | 145167754  | 145642166 | inside       | 238176  | 236029 | shortestDistance |
| chr2 | 145510706 | 145510967 | 262  | 1.61  | 0.00725  | 0.0332   | ENSMUSG000000063875Slc24a3   | protein_codi  | 145167754  | 145642166 | inside       | 343082  | 331199 | shortestDistance |
| chr2 | 145587946 | 145588341 | 396  | 1.63  | 5.61E-05 | 0.000695 | ENSMUSG000000063875Slc24a3   | protein_codi  | 145167754  | 145642166 | inside       | 402390  | 35825  | shortestDistance |
| chr2 | 145610873 | 145611595 | 723  | -0.79 | 0.0119   | 0.0484   | ENSMUSG000000063875Slc24a3   | protein_codi  | 145167754  | 145642166 | inside       | 443480  | 30571  | shortestDistance |
| chr2 | 145674887 | 145676216 | 1330 | -0.79 | 0.00841  | 0.0372   | ENSMUSG00000080759Bc039771   | processed_tr  | 145675367  | 145753672 | overlapStart | 185     | 480    | shortestDistance |
| chr2 | 145684852 | 145685324 | 473  | 2.46  | 2.87E-09 | 1.58E-07 | ENSMUSG00000080759Bc039771   | processed_tr  | 145675367  | 145753672 | inside       | 9721    | 9485   | shortestDistance |
| chr2 | 145720762 | 145721101 | 340  | 1.08  | 0.00344  | 0.0186   | ENSMUSG00000080759Bc039771   | processed_tr  | 145675367  | 145753672 | inside       | 45565   | 32571  | shortestDistance |
| chr2 | 145737290 | 145737585 | 296  | 1.4   | 0.000102 | 0.00113  | ENSMUSG00000080759Bc039771   | processed_tr  | 145675367  | 145753672 | inside       | 62071   | 6087   | shortestDistance |
| chr2 | 145756454 | 145756844 | 391  | 1.65  | 0.00232  | 0.0138   | ENSMUSG00000080759Bc039771   | processed_tr  | 145675367  | 145753672 | downstream   | 81282   | 2782   | shortestDistance |
| chr2 | 145797796 | 145798107 | 312  | 1.56  | 0.00242  | 0.0143   | ENSMUSG00000000176Rin2       | protein_codi  | 145784734  | 145887616 | inside       | 13218   | 13062  | shortestDistance |
| chr2 | 145804537 | 145804901 | 365  | 2.55  | 3.16E-08 | 1.26E-06 | ENSMUSG00000000176Rin2       | protein_codi  | 145784734  | 145887616 | inside       | 19985   | 19803  | shortestDistance |
| chr2 | 145821816 | 145822584 | 769  | 0.91  | 0.00564  | 0.0274   | ENSMUSG00000000176Rin2       | protein_codi  | 145784734  | 145887616 | inside       | 37466   | 37082  | shortestDistance |
| chr2 | 145860459 | 145860992 | 534  | 2.07  | 4.39E-06 | 8.23E-05 | ENSMUSG00000000176Rin2       | protein_codi  | 145784734  | 145887616 | inside       | 75992   | 26624  | shortestDistance |
| chr2 | 145887947 | 145888298 | 352  | 1.62  | 9.13E-06 | 0.000153 | ENSMUSG00000000176Rin2       | protein_codi  | 145784734  | 145887616 | downstream   | 103388  | 331    | shortestDistance |
| chr2 | 145952682 | 145953188 | 507  | 2.45  | 8.67E-07 | 2.08E-05 | ENSMUSG00000003714Cfp6p1     | protein_codi  | 145934784  | 146215039 | inside       | 18151   | 17998  | shortestDistance |
| chr2 | 146080334 | 146080707 | 374  | 2.4   | 1.13E-07 | 3.68E-06 | ENSMUSG00000003714Cfp6p1     | protein_codi  | 145934784  | 146215039 | inside       | 145736  | 13432  | shortestDistance |
| chr2 | 146098847 | 146099711 | 865  | 1.1   | 0.00109  | 0.00762  | ENSMUSG00000003714Cfp6p1     | protein_codi  | 145934784  | 146215039 | inside       | 164495  | 115328 | shortestDistance |
| chr2 | 146099747 | 146100209 | 463  | 2.82  | 2.05E-12 | 3.35E-10 | ENSMUSG00000003714Cfp6p1     | protein_codi  | 145934784  | 146215039 | inside       | 165194  | 11480  | shortestDistance |
| chr2 | 146264931 | 146265652 | 722  | -0.92 | 0.00653  | 0.0306   | ENSMUSG0000008959A93001919   | antisense_RI  | 146259286  | 146267160 | inside       | 6006    | 1508   | shortestDistance |
| chr2 | 146311024 | 146311520 | 497  | -0.96 | 0.0119   | 0.0484   | ENSMUSG00000003711Raigapa2   | protein_codi  | 146239879  | 146512344 | inside       | 201072  | 71145  | shortestDistance |
| chr2 | 146322711 | 146323284 | 574  | -1.03 | 0.00295  | 0.0166   | ENSMUSG00000003711Raigapa2   | protein_codi  | 146239879  | 146512344 | inside       | 189346  | 82832  | shortestDistance |
| chr2 | 146502626 | 146503452 | 827  | -1.19 | 0.000992 | 0.00709  | ENSMUSG00000003711Raigapa2   | protein_codi  | 146239879  | 146512344 | inside       | 9305    | 8892   | shortestDistance |
| chr2 | 146516924 | 146517283 | 360  | 1.52  | 5.08E-05 | 0.00064  | ENSMUSG00000003711Raigapa2   | protein_codi  | 146239879  | 146512344 | upstream     | -4760   | 4580   | shortestDistance |
| chr2 | 146834287 | 146835383 | 1097 | -1    | 0.00123  | 0.00838  | ENSMUSG0000000874Gm14114     | lincRNA       | 146828327  | 146839732 | inside       | 4897    | 4349   | shortestDistance |
| chr2 | 146872790 | 146873078 | 289  | -1.23 | 0.00425  | 0.022    | ENSMUSG00000007474Kiz        | protein_codi  | 146855864  | 146970097 | inside       | 17070   | 16926  | shortestDistance |
| chr2 | 147035768 | 147036329 | 562  | 2.24  | 6.56E-08 | 2.33E-06 | ENSMUSG00000002743Xrn2       | protein_codi  | 147012996  | 147078000 | inside       | 23052   | 22772  | shortestDistance |
| chr2 | 147194712 | 147195218 | 507  | -1.1  | 0.002    | 0.0123   | ENSMUSG00000008650Nkx2-2os   | antisense_RI  | 147184083  | 147331681 | inside       | 10882   | 10629  | shortestDistance |
| chr2 | 147216742 | 147217087 | 346  | -2.25 | 3.37E-08 | 1.33E-06 | ENSMUSG00000008650Nkx2-2os   | antisense_RI  | 147184083  | 147331681 | inside       | 32831   | 32659  | shortestDistance |
| chr2 | 147269163 | 147269666 | 504  | -1.79 | 7.10E-08 | 2.49E-06 | ENSMUSG00000008650Nkx2-2os   | antisense_RI  | 147184083  | 147331681 | inside       | 85331   | 62015  | shortestDistance |
| chr2 | 147283428 | 147283818 | 391  | -1.24 | 0.00472  | 0.0238   | ENSMUSG00000008650Nkx2-2os   | antisense_RI  | 147184083  | 147331681 | inside       | 99540   | 47863  | shortestDistance |
| chr2 | 147298097 | 147298914 | 818  | -1.92 | 2.94E-09 | 1.62E-07 | ENSMUSG00000008650Nkx2-2os   | antisense_RI  | 147184083  | 147331681 | inside       | 114423  | 32767  | shortestDistance |
|      |           |           |      |       |          |          |                              |               |            |           |              |         |        |                  |







|      |          |          |      |       |          |          |                    |            |              |          |          |              |        |        |                  |
|------|----------|----------|------|-------|----------|----------|--------------------|------------|--------------|----------|----------|--------------|--------|--------|------------------|
| chr3 | 7755352  | 7756466  | 1115 | -1.34 | 1.10E-05 | 0.000179 | ENSMUSG0000009780  | Gm16685    | antisense_RI | 7612705  | 7690001  | downstream   | 143204 | 65351  | shortestDistance |
| chr3 | 8566677  | 8567222  | 546  | -1.67 | 1.72E-06 | 3.69E-05 | ENSMUSG0000002750  | Stmn2      | protein_codi | 8509360  | 8561606  | downstream   | 57590  | 5071   | shortestDistance |
| chr3 | 8715981  | 8716304  | 324  | -1.17 | 0.00713  | 0.0327   | ENSMUSG0000010334  | C230057A21 | lincRNA      | 8732870  | 8736360  | downstream   | 20218  | 16566  | shortestDistance |
| chr3 | 8716363  | 8716862  | 500  | -1.24 | 0.002    | 0.0123   | ENSMUSG0000010334  | C230057A21 | lincRNA      | 8732870  | 8736360  | downstream   | 19748  | 16008  | shortestDistance |
| chr3 | 8717298  | 8717903  | 606  | -1.07 | 3.00E-06 | 5.95E-05 | ENSMUSG0000010334  | C230057A21 | lincRNA      | 8732870  | 8736360  | downstream   | 18760  | 14967  | shortestDistance |
| chr3 | 8721771  | 8722486  | 716  | -1.07 | 0.00219  | 0.0132   | ENSMUSG0000010334  | C230057A21 | lincRNA      | 8732870  | 8736360  | downstream   | 14232  | 10384  | shortestDistance |
| chr3 | 8756004  | 8756712  | 709  | -0.9  | 0.0109   | 0.0452   | ENSMUSG0000010325  | Gm37647    | TEC          | 8743682  | 8746824  | upstream     | -9534  | 9180   | shortestDistance |
| chr3 | 8766502  | 8767297  | 796  | -1.12 | 0.000295 | 0.0027   | ENSMUSG0000010325  | Gm37647    | TEC          | 8743682  | 8746824  | upstream     | -20076 | 19678  | shortestDistance |
| chr3 | 8767354  | 8767889  | 536  | -0.84 | 0.0114   | 0.0468   | ENSMUSG0000010325  | Gm37647    | TEC          | 8743682  | 8746824  | upstream     | -20798 | 20530  | shortestDistance |
| chr3 | 8862954  | 8863601  | 648  | -1.29 | 0.000304 | 0.00277  | ENSMUSG0000004026  | Mrps28     | protein_codi | 8802146  | 8923918  | inside       | 60640  | 60317  | shortestDistance |
| chr3 | 8902108  | 8902707  | 600  | -1.7  | 1.22E-05 | 0.000196 | ENSMUSG0000004026  | Mrps28     | protein_codi | 8802146  | 8923918  | inside       | 21510  | 21211  | shortestDistance |
| chr3 | 8956834  | 8957244  | 411  | 2.11  | 4.93E-07 | 1.29E-05 | ENSMUSG0000004026  | Tpd52      | protein_codi | 8925593  | 9004723  | inside       | 47684  | 31241  | shortestDistance |
| chr3 | 8958869  | 8959556  | 688  | -1.34 | 0.000405 | 0.0035   | ENSMUSG0000004026  | Tpd52      | protein_codi | 8925593  | 9004723  | inside       | 45511  | 33276  | shortestDistance |
| chr3 | 8963789  | 8964392  | 604  | -1.05 | 0.0016   | 0.0103   | ENSMUSG0000004026  | Tpd52      | protein_codi | 8925593  | 9004723  | inside       | 40633  | 38196  | shortestDistance |
| chr3 | 8971678  | 8972010  | 333  | -1.27 | 0.00119  | 0.00821  | ENSMUSG0000004026  | Tpd52      | protein_codi | 8925593  | 9004723  | inside       | 32879  | 32713  | shortestDistance |
| chr3 | 8976096  | 8976613  | 518  | -1.31 | 0.000229 | 0.00221  | ENSMUSG0000004026  | Tpd52      | protein_codi | 8925593  | 9004723  | inside       | 28369  | 28110  | shortestDistance |
| chr3 | 8993363  | 8993605  | 243  | 2.31  | 0.000304 | 0.00277  | ENSMUSG0000004026  | Tpd52      | protein_codi | 8925593  | 9004723  | inside       | 11239  | 11118  | shortestDistance |
| chr3 | 9005493  | 9005913  | 421  | 1.87  | 5.09E-07 | 1.33E-05 | ENSMUSG0000004026  | Tpd52      | protein_codi | 8925593  | 9004723  | upstream     | -980   | 770    | shortestDistance |
| chr3 | 9020173  | 9020847  | 675  | 1.21  | 0.000494 | 0.00409  | ENSMUSG0000004026  | Tpd52      | protein_codi | 8925593  | 9004723  | upstream     | -15787 | 15450  | shortestDistance |
| chr3 | 9173563  | 9174737  | 1175 | -1.12 | 0.000659 | 0.00514  | ENSMUSG0000006911  | Zbtb10     | protein_codi | 9250602  | 9285333  | upstream     | -76452 | 75865  | shortestDistance |
| chr3 | 9179406  | 9179927  | 522  | 2.62  | 4.71E-09 | 2.41E-07 | ENSMUSG0000006911  | Zbtb10     | protein_codi | 9250602  | 9285333  | upstream     | -70936 | 70675  | shortestDistance |
| chr3 | 9251556  | 9251881  | 326  | -1.07 | 0.00372  | 0.0198   | ENSMUSG0000006911  | Zbtb10     | protein_codi | 9250602  | 9285333  | inside       | 1116   | 954    | shortestDistance |
| chr3 | 9402737  | 9402737  | 375  | -0.98 | 0.0114   | 0.0468   | ENSMUSG0000000822  | Gm22604    | misc_RNA     | 9402175  | 9402485  | overlapEnd   | 375    | 122    | shortestDistance |
| chr3 | 9439538  | 9439932  | 395  | 1.23  | 0.00602  | 0.0288   | ENSMUSG0000004026  | Zfp704     | protein_codi | 9427020  | 9610085  | inside       | 170350 | 12518  | shortestDistance |
| chr3 | 9520423  | 9521035  | 613  | -1.34 | 2.25E-05 | 0.000326 | ENSMUSG0000004026  | Zfp704     | protein_codi | 9427020  | 9610085  | inside       | 89356  | 89050  | shortestDistance |
| chr3 | 9587225  | 9587716  | 492  | 2.53  | 4.07E-08 | 1.55E-06 | ENSMUSG0000004026  | Zfp704     | protein_codi | 9427020  | 9610085  | inside       | 22615  | 22369  | shortestDistance |
| chr3 | 9599866  | 9600163  | 298  | -1.38 | 0.000656 | 0.00512  | ENSMUSG0000004026  | Zfp704     | protein_codi | 9427020  | 9610085  | inside       | 10071  | 9922   | shortestDistance |
| chr3 | 9725074  | 9726022  | 949  | 3.23  | 6.26E-16 | 4.34E-13 | ENSMUSG0000000275  | Pag1       | protein_codi | 9687479  | 9833679  | inside       | 108131 | 37595  | shortestDistance |
| chr3 | 9759110  | 9759501  | 392  | 1.65  | 2.12E-05 | 0.00031  | ENSMUSG0000000879  | Gm16337    | lincRNA      | 9757607  | 9786142  | inside       | 1699   | 1503   | shortestDistance |
| chr3 | 9801033  | 9801572  | 540  | 1.92  | 1.74E-06 | 3.74E-05 | ENSMUSG0000000275  | Pag1       | protein_codi | 9687479  | 9833679  | inside       | 32377  | 32107  | shortestDistance |
| chr3 | 9820881  | 9821403  | 523  | -1.56 | 0.00121  | 0.00826  | ENSMUSG0000000275  | Pag1       | protein_codi | 9687479  | 9833679  | inside       | 12537  | 12276  | shortestDistance |
| chr3 | 9879418  | 9879874  | 457  | 1.42  | 0.00108  | 0.00756  | ENSMUSG0000010279  | Gm6236     | processed_p  | 9899430  | 9902377  | upstream     | -19784 | 19556  | shortestDistance |
| chr3 | 9884802  | 9885369  | 568  | 0.87  | 0.00666  | 0.0311   | ENSMUSG0000000879  | Gm6236     | processed_p  | 9899430  | 9902377  | upstream     | -14344 | 14061  | shortestDistance |
| chr3 | 10077059 | 10077525 | 467  | 1.89  | 2.74E-06 | 5.51E-05 | ENSMUSG0000004923  | Gm9833     | protein_codi | 10088110 | 10092565 | upstream     | -10818 | 10585  | shortestDistance |
| chr3 | 10140284 | 10140554 | 271  | -1.66 | 0.00706  | 0.0325   | ENSMUSG0000000246  | Pmp2       | protein_codi | 10179851 | 10183929 | downstream   | 43510  | 39297  | shortestDistance |
| chr3 | 10247002 | 10247736 | 735  | 2.09  | 3.26E-07 | 9.14E-06 | ENSMUSG0000000275  | Fabp12     | protein_codi | 10244209 | 10301183 | inside       | 53814  | 2793   | shortestDistance |
| chr3 | 10257997 | 10258780 | 784  | -1.13 | 0.00569  | 0.0275   | ENSMUSG0000000275  | Fabp12     | protein_codi | 10244209 | 10301183 | inside       | 42795  | 13788  | shortestDistance |
| chr3 | 10273153 | 10273690 | 538  | -1.11 | 0.00399  | 0.0209   | ENSMUSG0000000275  | Fabp12     | protein_codi | 10244209 | 10301183 | inside       | 27761  | 27493  | shortestDistance |
| chr3 | 10277982 | 10278470 | 489  | 1.7   | 7.96E-06 | 0.000136 | ENSMUSG0000000275  | Fabp12     | protein_codi | 10244209 | 10301183 | inside       | 22957  | 22713  | shortestDistance |
| chr3 | 10330982 | 10331596 | 615  | -1.14 | 0.000309 | 0.00281  | ENSMUSG0000000275  | Impa1      | protein_codi | 10311956 | 10331439 | overlapStart | 150    | 157    | shortestDistance |
| chr3 | 10685170 | 10685685 | 516  | -1.61 | 8.07E-06 | 0.000138 | ENSMUSG0000010445  | Gm37831    | TEC          | 10646316 | 10648102 | downstream   | 39112  | 37068  | shortestDistance |
| chr3 | 10686290 | 10686936 | 647  | -2.27 | 9.19E-06 | 0.000154 | ENSMUSG0000010445  | Gm37831    | TEC          | 10646316 | 10648102 | downstream   | 40297  | 38188  | shortestDistance |
| chr3 | 11034450 | 11034789 | 340  | -1.2  | 0.00106  | 0.00748  | ENSMUSG0000000815  | Gm37832    | processed_p  | 11044170 | 11044358 | downstream   | 9738   | 9381   | shortestDistance |
| chr3 | 11034981 | 11035650 | 670  | -2.14 | 4.62E-07 | 1.23E-05 | ENSMUSG0000000815  | Gm37832    | processed_p  | 11044170 | 11044358 | downstream   | 9042   | 8520   | shortestDistance |
| chr3 | 11173872 | 11174567 | 696  | -2.52 | 2.04E-09 | 1.19E-07 | ENSMUSG0000000958  | Gm22547    | miRNA        | 11154337 | 11154437 | downstream   | 19883  | 19435  | shortestDistance |
| chr3 | 11212894 | 11213847 | 954  | -1.76 | 1.65E-07 | 5.11E-06 | ENSMUSG0000000958  | Gm22547    | miRNA        | 11154337 | 11154437 | downstream   | 59033  | 58457  | shortestDistance |
| chr3 | 11328223 | 11329022 | 800  | -1.77 | 0.000464 | 0.00389  | ENSMUSG0000000958  | Gm22547    | miRNA        | 11154337 | 11154437 | downstream   | 174285 | 173786 | shortestDistance |
| chr3 | 11456240 | 11457372 | 1133 | -1.67 | 1.47E-06 | 3.23E-05 | ENSMUSG0000000980  | Gm8919     | processed_p  | 11658497 | 11659510 | downstream   | 202704 | 201125 | shortestDistance |
| chr3 | 11504022 | 11504630 | 609  | -2.82 | 7.08E-07 | 1.76E-05 | ENSMUSG0000000980  | Gm8919     | processed_p  | 11658497 | 11659510 | downstream   | 155184 | 153867 | shortestDistance |
| chr3 | 11511930 | 11512323 | 394  | -3.03 | 1.83E-08 | 7.86E-07 | ENSMUSG0000000980  | Gm8919     | processed_p  | 11658497 | 11659510 | downstream   | 147384 | 146174 | shortestDistance |
| chr3 | 11563054 | 11563829 | 776  | -3.35 | 4.53E-12 | 6.66E-10 | ENSMUSG0000000980  | Gm8919     | processed_p  | 11658497 | 11659510 | downstream   | 96068  | 94668  | shortestDistance |
| chr3 | 13471339 | 13471935 | 597  | -1.49 | 2.15E-05 | 0.000314 | ENSMUSG0000010221  | Gm2464     | lincRNA      | 13470439 | 13471829 | overlapStart | 192    | 106    | shortestDistance |
| chr3 | 13472678 | 13473395 | 718  | -1.1  | 0.00192  | 0.0119   | ENSMUSG00000003971 | Raiyl      | protein_codi | 13471655 | 14182287 | inside       | 1381   | 1023   | shortestDistance |
| chr3 | 13866365 | 13866849 | 485  | -1.26 | 0.000196 | 0.00194  | ENSMUSG00000003971 | Raiyl      | protein_codi | 13471655 | 14182287 | inside       | 394952 | 315438 | shortestDistance |
| chr3 | 14381303 | 14382255 | 953  | -0.99 | 0.00134  | 0.00901  | ENSMUSG00000003971 | Raiyl      | processed_p  | 14383922 | 14384400 | downstream   | 261    | 1667   | shortestDistance |
| chr3 | 14578405 | 14579309 | 905  | -0.79 | 0.00908  | 0.0395   | ENSMUSG0000000275  | E2f5       | protein_codi | 14578641 | 14606309 | overlapStart | 216    | 236    | shortestDistance |
| chr3 | 14641172 | 14642205 | 1034 | -0.81 | 0.0114   | 0.047    | ENSMUSG0000000275  | Car13      | protein_codi | 14641727 | 14663002 | overlapStart | -39    | 478    | shortestDistance |
| chr3 | 14652074 | 14652452 | 379  | -1.6  | 0.000182 | 0.00182  | ENSMUSG0000000275  | Car13      | protein_codi | 14641727 | 14663002 | inside       | 10536  | 10347  | shortestDistance |
| chr3 | 14659874 | 14660958 | 1085 | -1.29 | 0.00084  | 0.00622  | ENSMUSG0000000275  | Car13      | protein_codi | 14641727 | 14663002 | inside       | 18689  | 2044   | shortestDistance |
| chr3 | 14679025 | 14679899 | 875  | -1.35 | 7.96E-05 | 0.000923 | ENSMUSG0000000275  | Car13      | protein_codi | 14641727 | 14663002 | downstream   | 37735  | 16023  | shortestDistance |
| chr3 | 14862589 | 14863672 | 1084 | -0.82 | 0.0111   | 0.0458   | ENSMUSG0000000275  | Car13      | protein_codi | 14863512 | 14872523 | overlapStart | -382   | 160    | shortestDistance |
| chr3 | 14880211 | 14880743 | 533  | -0.8  | 0.00963  | 0.0412   | ENSMUSG0000000275  | Car2       | protein_codi | 14886273 | 14900770 | upstream     | -5796  | 5530   | shortestDistance |
| chr3 | 14912090 | 14912514 | 425  | -1.32 | 0.000207 | 0.00203  | ENSMUSG0000000275  | Car2       | protein_codi | 14886273 | 14900770 | downstream   | 26029  | 11320  | shortestDistance |
| chr3 | 14959374 | 14960040 | 667  | -1.61 | 8.07E-06 | 0.000138 | ENSMUSG0000000980  | A930001A20 | lincRNA      | 14971201 | 15002727 | upstream     | -11494 | 11161  | shortestDistance |
| chr3 | 14969741 | 14970249 | 509  | -1.24 | 0.000379 | 0.00332  | ENSMUSG0000000980  | A930001A20 | lincRNA      | 14971201 | 15002727 | upstream     | -1206  | 952    | shortestDistance |
| chr3 | 14979295 | 14979613 | 319  | -1.27 | 0.00204  | 0.0125   | ENSMUSG0000000980  | A930001A20 | lincRNA      | 14971201 | 15002727 | inside       | 8253   | 8094   | shortestDistance |
| chr3 | 15007826 | 15008163 | 338  | -2.33 | 1.19E-07 | 3.87E-06 | ENSMUSG0000000980  | A930001A20 | lincRNA      | 14971201 | 15002727 | downstream   | 36793  | 5099   | shortestDistance |
| chr3 | 15012332 | 15012578 | 247  | -2.18 | 1.54E-06 | 3.38E-05 | ENSMUSG0000000980  | A930001A20 | lincRNA      | 14971201 | 15002727 | downstream   | 41254  | 9605   | shortestDistance |
| chr3 | 15106328 | 15106915 | 588  | -1.65 | 1.46E-05 | 0.000226 | ENSMUSG0000010391  | Gm33819    | lincRNA      | 15153065 | 15171442 | downstream   | 64820  | 46150  | shortestDistance |
| chr3 | 15128388 | 15128801 | 414  | -0.99 | 0.00617  | 0.0293   | ENSMUSG0000010391  | Gm33819    | lincRNA      | 15153065 | 15171442 | downstream   | 42848  | 24264  | shortestDistance |
| chr3 | 15156595 | 15157134 | 540  | -1.7  | 8.58E-06 | 0.000145 | ENSMUSG0000010391  | Gm33819    | lincRNA      | 15153065 | 15171442 | inside       | 14578  | 353    |                  |

|      |           |          |      |       |          |          |                    |             |               |          |          |              |        |        |                  |
|------|-----------|----------|------|-------|----------|----------|--------------------|-------------|---------------|----------|----------|--------------|--------|--------|------------------|
| chr3 | 19062008  | 19062542 | 535  | -1.32 | 0.000476 | 0.00397  | ENSMUSG0000002759  | Armc1       | protein_codi  | 19131402 | 19163065 | downstream   | 100790 | 68860  | shortestDistance |
| chr3 | 19187461  | 19188657 | 1197 | -0.78 | 0.011    | 0.0457   | ENSMUSG0000002760  | Mtf1        | protein_codi  | 19187327 | 19220817 | inside       | 732    | 134    | shortestDistance |
| chr3 | 19201314  | 19201715 | 402  | 1.89  | 6.70E-05 | 0.00804  | ENSMUSG0000002760  | Mtf1        | protein_codi  | 19187327 | 19220817 | inside       | 14187  | 13987  | shortestDistance |
| chr3 | 19239806  | 19240353 | 548  | -1.69 | 2.62E-06 | 5.31E-05 | ENSMUSG0000000871  | Gm16093     | antisense_RI  | 19227780 | 19240987 | inside       | 12300  | 634    | shortestDistance |
| chr3 | 19249809  | 19250375 | 567  | -1.58 | 4.03E-06 | 7.65E-05 | ENSMUSG0000006909  | Pde7a       | protein_codi  | 19223108 | 19311322 | inside       | 61230  | 26701  | shortestDistance |
| chr3 | 19258449  | 19259173 | 725  | -1.19 | 9.63E-05 | 0.00108  | ENSMUSG0000006909  | Pde7a       | protein_codi  | 19223108 | 19311322 | inside       | 52511  | 35341  | shortestDistance |
| chr3 | 19300073  | 19300584 | 512  | -1.04 | 0.00262  | 0.0152   | ENSMUSG0000006909  | Pde7a       | protein_codi  | 19223108 | 19311322 | inside       | 10994  | 10738  | shortestDistance |
| chr3 | 19366958  | 19367473 | 516  | -1.08 | 0.00309  | 0.0172   | ENSMUSG0000000894  | Gm22282     | misc_RNA      | 19330773 | 19331084 | downstream   | 36443  | 34443  | shortestDistance |
| chr3 | 19397149  | 19397543 | 395  | -2.46 | 2.44E-08 | 1.00E-06 | ENSMUSG0000000894  | Gm22282     | misc_RNA      | 19330773 | 19331084 | downstream   | 66573  | 66065  | shortestDistance |
| chr3 | 19406334  | 19406582 | 249  | -1.34 | 0.000444 | 0.00376  | ENSMUSG0000000894  | Gm22282     | misc_RNA      | 19330773 | 19331084 | downstream   | 75685  | 75250  | shortestDistance |
| chr3 | 19410972  | 19411616 | 645  | -1.4  | 1.43E-05 | 0.000222 | ENSMUSG0000000894  | Gm22282     | misc_RNA      | 19330773 | 19331084 | downstream   | 80521  | 79888  | shortestDistance |
| chr3 | 19447686  | 19448098 | 413  | 3.04  | 7.62E-11 | 7.35E-09 | ENSMUSG0000002760  | Dnajc5b     | protein_codi  | 19508595 | 19610862 | upstream     | -60703 | 60497  | shortestDistance |
| chr3 | 19533017  | 19533326 | 310  | -1.06 | 0.00702  | 0.0324   | ENSMUSG0000002760  | Dnajc5b     | protein_codi  | 19508595 | 19610862 | inside       | 24577  | 24422  | shortestDistance |
| chr3 | 19619453  | 19620000 | 548  | -1.9  | 4.94E-07 | 1.29E-05 | ENSMUSG00000008276 | 1700064H15  | protein_codi  | 19610368 | 19628677 | inside       | 8951   | 8677   | shortestDistance |
| chr3 | 19663243  | 19663693 | 451  | -1.88 | 2.40E-06 | 4.93E-05 | ENSMUSG0000006091  | Trim55      | protein_codi  | 19644474 | 19692421 | inside       | 18994  | 18769  | shortestDistance |
| chr3 | 19706475  | 19707323 | 849  | -1.38 | 8.48E-05 | 0.00097  | ENSMUSG0000010226  | Gm18864     | processed_p   | 19708270 | 19709320 | downstream   | 2421   | 947    | shortestDistance |
| chr3 | 19829677  | 19830195 | 519  | -1.57 | 0.000167 | 0.0017   | ENSMUSG0000010618  | Gm7442      | processed_p   | 19768873 | 19769255 | downstream   | 61063  | 60422  | shortestDistance |
| chr3 | 19847678  | 19847930 | 253  | -2.5  | 2.49E-07 | 7.27E-06 | ENSMUSG00000004810 | 4632415L05f | lincRNA       | 19894886 | 19898984 | upstream     | -47082 | 46956  | shortestDistance |
| chr3 | 199004501 | 19905082 | 582  | -1.49 | 1.19E-05 | 0.000191 | ENSMUSG00000004810 | 4632415L05f | lincRNA       | 19894886 | 19898984 | downstream   | 9906   | 5517   | shortestDistance |
| chr3 | 20004425  | 20004958 | 534  | 1.21  | 0.000833 | 0.00618  | ENSMUSG00000002761 | Hps3        | protein_codi  | 19995945 | 20035315 | inside       | 30623  | 8480   | shortestDistance |
| chr3 | 20026514  | 20026839 | 326  | 1.02  | 0.00303  | 0.0169   | ENSMUSG00000002761 | Hps3        | protein_codi  | 19995945 | 20035315 | inside       | 8639   | 8476   | shortestDistance |
| chr3 | 20034719  | 20035515 | 797  | -0.96 | 0.00174  | 0.011    | ENSMUSG00000002761 | Hps3        | protein_codi  | 19995945 | 20035315 | overlapStart | 198    | 200    | shortestDistance |
| chr3 | 20057344  | 20058196 | 853  | -0.93 | 0.00368  | 0.0197   | ENSMUSG0000000242  | Htf         | protein_codi  | 20057811 | 20118490 | overlapStart | -41    | 385    | shortestDistance |
| chr3 | 20076462  | 20077027 | 566  | -1.37 | 4.90E-05 | 0.000621 | ENSMUSG0000000242  | Htf         | protein_codi  | 20057811 | 20118490 | inside       | 18933  | 18651  | shortestDistance |
| chr3 | 20104753  | 20105216 | 464  | -1.23 | 0.000412 | 0.00354  | ENSMUSG0000000242  | Htf         | protein_codi  | 20057811 | 20118490 | inside       | 47173  | 13274  | shortestDistance |
| chr3 | 20129579  | 20130035 | 457  | 1.97  | 4.15E-07 | 1.12E-05 | ENSMUSG00000001952 | Gyg         | protein_codi  | 20122084 | 20155317 | inside       | 25510  | 7495   | shortestDistance |
| chr3 | 20130428  | 20131057 | 630  | 2     | 1.01E-06 | 2.36E-05 | ENSMUSG00000001952 | Gyg         | protein_codi  | 20122084 | 20155317 | inside       | 24575  | 8344   | shortestDistance |
| chr3 | 20154318  | 20155373 | 1056 | -0.97 | 0.00372  | 0.0198   | ENSMUSG00000001952 | Gyg         | protein_codi  | 20122084 | 20155317 | overlapStart | 471    | 56     | shortestDistance |
| chr3 | 20197839  | 20198627 | 789  | -1.05 | 0.00695  | 0.0322   | ENSMUSG0000000186  | Cpa3        | protein_codi  | 20215620 | 20242181 | downstream   | 43948  | 16993  | shortestDistance |
| chr3 | 20239727  | 20240079 | 353  | 1.81  | 1.14E-05 | 0.000185 | ENSMUSG0000000186  | Cpa3        | protein_codi  | 20215620 | 20242181 | inside       | 2278   | 2102   | shortestDistance |
| chr3 | 20242024  | 20242466 | 443  | -1.47 | 1.92E-05 | 0.000285 | ENSMUSG0000000186  | Cpa3        | protein_codi  | 20215620 | 20242181 | overlapStart | -64    | 157    | shortestDistance |
| chr3 | 20334708  | 20335026 | 319  | -1.56 | 2.84E-05 | 0.000395 | ENSMUSG00000005498 | Agrt1b      | protein_codi  | 20314473 | 20367177 | inside       | 32310  | 20235  | shortestDistance |
| chr3 | 20340471  | 20340723 | 253  | -2.41 | 2.90E-07 | 8.26E-06 | ENSMUSG00000005498 | Agrt1b      | protein_codi  | 20314473 | 20367177 | inside       | 26580  | 25998  | shortestDistance |
| chr3 | 20509103  | 20509568 | 466  | -1    | 0.00271  | 0.0155   | ENSMUSG0000010263  | Gm31466     | lincRNA       | 20503098 | 20506208 | upstream     | -3128  | 2895   | shortestDistance |
| chr3 | 20551594  | 20552144 | 551  | -1.39 | 0.00026  | 0.00244  | ENSMUSG0000010263  | Gm31466     | lincRNA       | 20503098 | 20506208 | upstream     | -45661 | 45386  | shortestDistance |
| chr3 | 20714673  | 20715058 | 386  | -1.82 | 4.70E-06 | 8.73E-05 | ENSMUSG0000010346  | Gm18491     | processed_p   | 20782470 | 20784063 | downstream   | 69197  | 67412  | shortestDistance |
| chr3 | 20977611  | 20977974 | 364  | -1.29 | 0.00103  | 0.00731  | ENSMUSG00000003961 | Gm7488      | processed_p   | 21049565 | 21050248 | upstream     | -71773 | 71591  | shortestDistance |
| chr3 | 21033843  | 21034132 | 290  | -1.49 | 0.000363 | 0.0032   | ENSMUSG00000003961 | Gm7488      | processed_p   | 21049565 | 21050248 | upstream     | -15577 | 15433  | shortestDistance |
| chr3 | 21582030  | 21582688 | 659  | -1.24 | 0.000728 | 0.00555  | ENSMUSG0000010608  | Gm43675     | unprocessed   | 21603810 | 21605508 | upstream     | -21451 | 21122  | shortestDistance |
| chr3 | 21621738  | 21622284 | 547  | -0.88 | 0.00762  | 0.0345   | ENSMUSG0000010608  | Gm43675     | unprocessed   | 21603810 | 21605508 | downstream   | 18201  | 16230  | shortestDistance |
| chr3 | 21639569  | 21639969 | 401  | -1.6  | 0.00011  | 0.00121  | ENSMUSG0000010646  | Gm17935     | processed_p   | 21648387 | 21649158 | upstream     | -8618  | 8418   | shortestDistance |
| chr3 | 21645391  | 21645652 | 262  | -1.09 | 0.00827  | 0.0368   | ENSMUSG0000010646  | Gm17935     | processed_p   | 21648387 | 21649158 | upstream     | -2865  | 2735   | shortestDistance |
| chr3 | 21761943  | 21762529 | 587  | -0.97 | 0.00487  | 0.0244   | ENSMUSG0000010344  | 7530428023l | transcribed_J | 21753529 | 21800773 | inside       | 38537  | 8414   | shortestDistance |
| chr3 | 21949251  | 21950001 | 751  | 1.74  | 6.63E-07 | 1.66E-05 | ENSMUSG0000010632  | Gm43674     | lincRNA       | 21997678 | 21998468 | downstream   | 48842  | 47677  | shortestDistance |
| chr3 | 21958610  | 21959100 | 491  | 2.69  | 2.77E-09 | 1.54E-07 | ENSMUSG0000010632  | Gm43674     | lincRNA       | 21997678 | 21998468 | downstream   | 39613  | 38578  | shortestDistance |
| chr3 | 21961133  | 21961587 | 455  | 1.55  | 8.04E-05 | 0.000931 | ENSMUSG0000010632  | Gm43674     | lincRNA       | 21997678 | 21998468 | downstream   | 37108  | 36091  | shortestDistance |
| chr3 | 21962350  | 21962646 | 297  | 1.87  | 1.54E-06 | 3.37E-05 | ENSMUSG0000010632  | Gm43674     | lincRNA       | 21997678 | 21998468 | downstream   | 35970  | 35032  | shortestDistance |
| chr3 | 21995809  | 21996338 | 530  | -1.01 | 0.00387  | 0.0204   | ENSMUSG0000010632  | Gm43674     | lincRNA       | 21997678 | 21998468 | downstream   | 2394   | 1340   | shortestDistance |
| chr3 | 22002326  | 22022794 | 469  | -1.21 | 0.00015  | 0.00978  | ENSMUSG0000010652  | Gm43671     | processed_p   | 22021197 | 22021629 | downstream   | 1363   | 697    | shortestDistance |
| chr3 | 22089885  | 22090241 | 357  | -1.14 | 0.00298  | 0.0167   | ENSMUSG00000002763 | Tbl1xr1     | protein_codi  | 22076652 | 22216594 | inside       | 13411  | 13233  | shortestDistance |
| chr3 | 22115250  | 22115574 | 325  | -1.41 | 0.000419 | 0.00359  | ENSMUSG00000002763 | Tbl1xr1     | protein_codi  | 22076652 | 22216594 | inside       | 38760  | 38598  | shortestDistance |
| chr3 | 22144307  | 22144587 | 281  | -1.56 | 5.15E-05 | 0.000648 | ENSMUSG00000002763 | Tbl1xr1     | protein_codi  | 22076652 | 22216594 | inside       | 67795  | 67655  | shortestDistance |
| chr3 | 22190532  | 22190868 | 337  | -0.94 | 0.00732  | 0.0334   | ENSMUSG00000002763 | Tbl1xr1     | protein_codi  | 22076652 | 22216594 | inside       | 114048 | 25726  | shortestDistance |
| chr3 | 22238501  | 22238874 | 374  | 3.6   | 1.79E-09 | 1.06E-07 | ENSMUSG0000000777  | Rpr12       | ribozyme      | 22251374 | 22251663 | upstream     | -12686 | 12500  | shortestDistance |
| chr3 | 22308878  | 22309334 | 457  | -1.28 | 0.000169 | 0.00172  | ENSMUSG0000010298  | Gm38324     | lincRNA       | 22285081 | 22297830 | upstream     | -11276 | 11048  | shortestDistance |
| chr3 | 23089191  | 23089886 | 696  | -1.51 | 0.000242 | 0.0023   | ENSMUSG0000010360  | Gm37021     | lincRNA       | 23085975 | 23088949 | downstream   | 3563   | 242    | shortestDistance |
| chr3 | 23635337  | 23636010 | 674  | -1.78 | 8.36E-07 | 2.02E-05 | ENSMUSG0000010275  | Naalad12    | lincRNA       | 23461050 | 23521398 | downstream   | 174624 | 113939 | shortestDistance |
| chr3 | 24880351  | 24881302 | 952  | -2.54 | 5.07E-07 | 1.32E-05 | ENSMUSG0000010275  | Naalad12    | protein_codi  | 23798102 | 25144261 | inside       | 263435 | 262959 | shortestDistance |
| chr3 | 250063233 | 25063570 | 338  | -2.28 | 7.04E-05 | 0.000837 | ENSMUSG0000010275  | Naalad12    | protein_codi  | 23798102 | 25144261 | inside       | 80859  | 80691  | shortestDistance |
| chr3 | 25124843  | 25125856 | 1014 | -2.54 | 7.26E-06 | 0.000126 | ENSMUSG0000010275  | Naalad12    | protein_codi  | 23798102 | 25144261 | inside       | 18911  | 18405  | shortestDistance |
| chr3 | 25143522  | 25144417 | 896  | -1.6  | 7.16E-05 | 0.000848 | ENSMUSG0000010275  | Naalad12    | protein_codi  | 23798102 | 25144261 | overlapStart | 291    | 156    | shortestDistance |
| chr3 | 25653006  | 25653560 | 555  | -2.46 | 3.81E-08 | 1.47E-06 | ENSMUSG0000006388  | Nlgm1       | protein_codi  | 25426215 | 26332460 | inside       | 679177 | 226791 | shortestDistance |
| chr3 | 25679161  | 25680055 | 895  | -2.54 | 4.40E-10 | 3.20E-08 | ENSMUSG0000006388  | Nlgm1       | protein_codi  | 25426215 | 26332460 | inside       | 652852 | 252946 | shortestDistance |
| chr3 | 25844734  | 25845482 | 749  | -2.61 | 1.07E-08 | 4.96E-07 | ENSMUSG0000006388  | Nlgm1       | protein_codi  | 25426215 | 26332460 | inside       | 487352 | 418519 | shortestDistance |
| chr3 | 25845561  | 25845872 | 312  | -2.06 | 2.04E-06 | 4.29E-05 | ENSMUSG0000006388  | Nlgm1       | protein_codi  | 25426215 | 26332460 | inside       | 486744 | 419346 | shortestDistance |
| chr3 | 26095588  | 26095961 | 374  | -2.6  | 9.41E-09 | 4.44E-07 | ENSMUSG0000006388  | Nlgm1       | protein_codi  | 25426215 | 26332460 | inside       | 236686 | 236499 | shortestDistance |
| chr3 | 26096217  | 26096700 | 484  | -2.08 | 0.000464 | 0.0039   | ENSMUSG0000006388  | Nlgm1       | protein_codi  | 25426215 | 26332460 | inside       | 236002 | 235760 | shortestDistance |
| chr3 | 26152478  | 26152742 | 265  | -2.26 | 4.29E-05 | 0.000557 | ENSMUSG0000006388  | Nlgm1       | protein_codi  | 25426215 | 26332460 | inside       | 179850 | 179718 | shortestDistance |
| chr3 | 26152836  | 26154170 | 1335 | -1.5  | 3.01E-05 | 0.000415 | ENSMUSG0000006388  | Nlgm1       | protein_codi  | 25426215 | 26332460 | inside       | 178957 | 178290 | shortestDistance |
| chr3 | 26331191  | 26332067 | 877  | -1.96 | 0.000423 | 0.00362  | ENSMUSG0000007466  | A830092H15  | antisense_RI  | 26331150 | 26333377 | inside       | 479    | 41     | shortestDistance |
| chr3 | 2633      |          |      |       |          |          |                    |             |               |          |          |              |        |        |                  |











|      |           |           |      |       |          |          |                                          |              |           |           |              |        |       |                  |
|------|-----------|-----------|------|-------|----------|----------|------------------------------------------|--------------|-----------|-----------|--------------|--------|-------|------------------|
| chr3 | 93031475  | 93031801  | 327  | -1.33 | 0.000167 | 0.0017   | ENSMUSG00000002791Lce1m                  | protein_codi | 93017810  | 93019060  | upstream     | -12578 | 12415 | shortestDistance |
| chr3 | 93093660  | 93093958  | 299  | -1.53 | 0.000109 | 0.0012   | ENSMUSG0000010362Gm37361                 | processed_p  | 93100466  | 93100597  | downstream   | 6788   | 6508  | shortestDistance |
| chr3 | 93114478  | 93114858  | 381  | -0.85 | 0.0111   | 0.046    | ENSMUSG0000010362Gm37361                 | processed_p  | 93100466  | 93100597  | upstream     | -14071 | 13881 | shortestDistance |
| chr3 | 93134074  | 93130979  | 506  | -0.88 | 0.00832  | 0.0369   | ENSMUSG0000007865Crmn                    | protein_codi | 93144787  | 93149819  | upstream     | -14061 | 13808 | shortestDistance |
| chr3 | 93447257  | 93447489  | 233  | -0.87 | 0.00935  | 0.0403   | ENSMUSG0000005241Tchh                    | protein_codi | 93442330  | 93449077  | inside       | 5043   | 1588  | shortestDistance |
| chr3 | 93490292  | 93490619  | 328  | -1.44 | 0.00134  | 0.00899  | ENSMUSG0000010413Gm36953                 | processed_p  | 93499815  | 93500300  | downstream   | 9844   | 9196  | shortestDistance |
| chr3 | 93512756  | 93513061  | 306  | 3.26  | 4.52E-09 | 2.33E-07 | ENSMUSG0000002790S100a11                 | protein_codi | 93520488  | 93526287  | upstream     | -7580  | 7427  | shortestDistance |
| chr3 | 93521421  | 93521841  | 421  | 0.89  | 0.00559  | 0.0272   | ENSMUSG0000002790S100a11                 | protein_codi | 93520488  | 93526287  | inside       | 1143   | 933   | shortestDistance |
| chr3 | 93555958  | 93556328  | 371  | 1.35  | 6.00E-05 | 0.000736 | ENSMUSG0000004195S100a10                 | protein_codi | 93555080  | 93564643  | inside       | 1063   | 878   | shortestDistance |
| chr3 | 93562347  | 93562947  | 601  | -1.31 | 2.00E-04 | 0.00198  | ENSMUSG0000004195S100a10                 | protein_codi | 93555080  | 93564643  | inside       | 7567   | 1696  | shortestDistance |
| chr3 | 94260623  | 94260973  | 351  | -1.28 | 0.0043   | 0.0222   | ENSMUSG0000008969Gm4778                  | protein_codi | 94264036  | 94266784  | upstream     | -3238  | 3063  | shortestDistance |
| chr3 | 94387873  | 94388646  | 774  | -1.12 | 0.00101  | 0.00721  | ENSMUSG0000002815Rorc                    | protein_codi | 94372794  | 94398276  | inside       | 15466  | 9630  | shortestDistance |
| chr3 | 94398855  | 94399610  | 756  | -0.83 | 0.0119   | 0.0485   | ENSMUSG0000004450Lingo4                  | protein_codi | 94398517  | 94404501  | inside       | 715    | 338   | shortestDistance |
| chr3 | 94482848  | 94483241  | 394  | 2.04  | 1.62E-06 | 3.52E-05 | ENSMUSG0000002813Celf3                   | protein_codi | 94478295  | 94492198  | inside       | 4749   | 4553  | shortestDistance |
| chr3 | 94587901  | 94588471  | 571  | 4.46  | 3.89E-19 | 1.31E-15 | ENSMUSG0000010552Gm15235                 | processed_p  | 94589466  | 94589659  | upstream     | -1280  | 995   | shortestDistance |
| chr3 | 94996959  | 94997304  | 346  | 1     | 0.00607  | 0.0289   | ENSMUSG0000008484A730011C131antisense_RI | antisense_RI | 94994410  | 94997350  | inside       | 218    | 46    | shortestDistance |
| chr3 | 95135028  | 95135290  | 263  | 1.35  | 0.000272 | 0.00253  | ENSMUSG0000005376Lysmd1                  | protein_codi | 95134088  | 95139518  | inside       | 1071   | 940   | shortestDistance |
| chr3 | 95142079  | 95142528  | 450  | 1.16  | 0.02026  | 0.0126   | ENSMUSG0000001370Tnfai28l2               | protein_codi | 95139521  | 95142360  | overlapStart | 56     | 168   | shortestDistance |
| chr3 | 95153927  | 95154205  | 279  | 1.15  | 0.00749  | 0.034    | ENSMUSG0000003877Sema6c                  | protein_codi | 95160457  | 95174024  | upstream     | -6391  | 6252  | shortestDistance |
| chr3 | 95217136  | 95218219  | 1084 | 1.08  | 0.00608  | 0.00527  | ENSMUSG0000003876Galpb2                  | protein_codi | 95181766  | 95217196  | overlapStart | 238    | 303   | shortestDistance |
| chr3 | 95263188  | 95263775  | 588  | 1.11  | 0.00607  | 0.0289   | ENSMUSG0000001571Prune1                  | protein_codi | 95253674  | 95282076  | inside       | 18594  | 9514  | shortestDistance |
| chr3 | 95281593  | 95282058  | 466  | 1.09  | 0.00121  | 0.00828  | ENSMUSG0000001571Prune1                  | protein_codi | 95253674  | 95282076  | inside       | 250    | 18    | shortestDistance |
| chr3 | 95282320  | 95282673  | 354  | 1.76  | 1.22E-06 | 2.77E-05 | ENSMUSG0000003871Mindy1                  | protein_codi | 95281345  | 95296166  | inside       | 1151   | 975   | shortestDistance |
| chr3 | 95294346  | 95294736  | 391  | 1.07  | 0.00482  | 0.0242   | ENSMUSG0000003871Mindy1                  | protein_codi | 95281345  | 95296166  | inside       | 13196  | 1430  | shortestDistance |
| chr3 | 95357030  | 95357456  | 427  | 1.38  | 0.000243 | 0.00231  | ENSMUSG0000001569Setdb1                  | protein_codi | 95323525  | 95357202  | overlapStart | -41    | 172   | shortestDistance |
| chr3 | 95450486  | 95450742  | 257  | 1.6   | 0.00185  | 0.0116   | ENSMUSG0000001552Arct                    | protein_codi | 95434388  | 95497240  | inside       | 16226  | 16098 | shortestDistance |
| chr3 | 95523557  | 95524103  | 547  | 1.39  | 0.000148 | 0.00155  | ENSMUSG0000003864Ctss                    | protein_codi | 95526786  | 95556403  | upstream     | -2956  | 2683  | shortestDistance |
| chr3 | 95650453  | 95651072  | 620  | 1.16  | 0.000352 | 0.00312  | ENSMUSG0000003861Mc1l                    | protein_codi | 95658788  | 95663176  | upstream     | -8026  | 7716  | shortestDistance |
| chr3 | 95652266  | 95652865  | 600  | 1.35  | 0.000439 | 0.00373  | ENSMUSG0000003861Mc1l                    | protein_codi | 95658788  | 95663176  | upstream     | -6222  | 5923  | shortestDistance |
| chr3 | 95668621  | 95669574  | 954  | 1.03  | 0.00133  | 0.00895  | ENSMUSG0000003861Mc1l                    | protein_codi | 95658788  | 95663176  | downstream   | 10310  | 5445  | shortestDistance |
| chr3 | 95706264  | 95706671  | 408  | 1.36  | 0.000463 | 0.0039   | ENSMUSG0000001585Adams14                 | protein_codi | 95676201  | 95687917  | upstream     | -18551 | 18347 | shortestDistance |
| chr3 | 95707496  | 95708005  | 510  | 1.06  | 0.00491  | 0.0245   | ENSMUSG0000001585Adams14                 | protein_codi | 95676201  | 95687917  | upstream     | -19833 | 19579 | shortestDistance |
| chr3 | 95891780  | 95892161  | 382  | 0.94  | 0.0089   | 0.0388   | ENSMUSG0000003876Galpb2                  | protein_codi | 95883954  | 95892005  | overlapStart | 35     | 156   | shortestDistance |
| chr3 | 95959898  | 95960149  | 252  | 1.71  | 0.000283 | 0.00262  | ENSMUSG0000010664Gm20940                 | processed_p  | 95964029  | 95964388  | downstream   | 4364   | 3880  | shortestDistance |
| chr3 | 96262817  | 96263595  | 779  | 0.84  | 0.00958  | 0.0411   | ENSMUSG0000003876Galpb2                  | protein_codi | 96261682  | 96263311  | overlapStart | 105    | 284   | shortestDistance |
| chr3 | 96300608  | 96301129  | 522  | 1.63  | 4.86E-05 | 0.000616 | ENSMUSG0000001594Fcg1r                   | protein_codi | 96282909  | 96293969  | upstream     | -6899  | 6639  | shortestDistance |
| chr3 | 96427819  | 96428259  | 711  | 1.11  | 0.00302  | 0.0169   | ENSMUSG0000000595Gm24136                 | snRNA        | 96422733  | 96422897  | downstream   | 5441   | 4922  | shortestDistance |
| chr3 | 96997790  | 96998174  | 385  | 1.72  | 0.000128 | 0.00136  | ENSMUSG00000005712Gja5                   | protein_codi | 96904693  | 97077416  | inside       | 93289  | 79242 | shortestDistance |
| chr3 | 97227187  | 97228199  | 1013 | 0.83  | 0.00837  | 0.0371   | ENSMUSG0000003825Bcl9                    | protein_codi | 97203662  | 97297917  | inside       | 70224  | 23525 | shortestDistance |
| chr3 | 97232356  | 97232745  | 390  | 1.4   | 0.000296 | 0.00271  | ENSMUSG0000003825Bcl9                    | protein_codi | 97203662  | 97297917  | inside       | 65367  | 28694 | shortestDistance |
| chr3 | 97615894  | 97616500  | 607  | 4.93  | 7.12E-18 | 1.34E-14 | ENSMUSG0000010500Gm43075                 | TEC          | 97609932  | 97613836  | downstream   | 6265   | 2058  | shortestDistance |
| chr3 | 97657756  | 97658878  | 1123 | 0.84  | 0.012    | 0.0487   | ENSMUSG0000003820Pkrab2                  | protein_codi | 97658193  | 97673812  | overlapStart | 124    | 437   | shortestDistance |
| chr3 | 97774843  | 97775282  | 440  | 1.44  | 0.000181 | 0.00182  | ENSMUSG0000003817Pde4dip                 | protein_codi | 97689824  | 97888707  | inside       | 113645 | 85019 | shortestDistance |
| chr3 | 97830651  | 97830973  | 323  | 1.58  | 0.000104 | 0.00115  | ENSMUSG0000003817Pde4dip                 | protein_codi | 97689824  | 97888707  | inside       | 57895  | 57734 | shortestDistance |
| chr3 | 97831552  | 97831964  | 413  | 1.01  | 0.00603  | 0.0288   | ENSMUSG0000003817Pde4dip                 | protein_codi | 97689824  | 97888707  | inside       | 56949  | 56743 | shortestDistance |
| chr3 | 97993983  | 97994531  | 549  | 2.12  | 1.25E-06 | 2.82E-05 | ENSMUSG0000002787Notch2                  | protein_codi | 98013527  | 98150361  | upstream     | -19270 | 18996 | shortestDistance |
| chr3 | 97994851  | 97995251  | 401  | 2.85  | 2.36E-10 | 1.90E-08 | ENSMUSG0000002787Notch2                  | protein_codi | 98013527  | 98150361  | upstream     | -18476 | 18276 | shortestDistance |
| chr3 | 98024340  | 98024834  | 495  | 1.51  | 5.00E-05 | 0.000631 | ENSMUSG0000002787Notch2                  | protein_codi | 98013527  | 98150361  | inside       | 11060  | 10813 | shortestDistance |
| chr3 | 98031153  | 98031566  | 414  | 1.31  | 0.000226 | 0.00218  | ENSMUSG0000010572Gm42819                 | TEC          | 98030687  | 98035807  | inside       | 673    | 466   | shortestDistance |
| chr3 | 98032225  | 98032606  | 382  | 2.53  | 1.16E-10 | 1.05E-08 | ENSMUSG0000010572Gm42819                 | TEC          | 98030687  | 98035807  | inside       | 1729   | 1538  | shortestDistance |
| chr3 | 98066487  | 98066849  | 363  | 1.7   | 2.67E-06 | 5.39E-05 | ENSMUSG0000002787Notch2                  | protein_codi | 98013527  | 98150361  | inside       | 53141  | 52960 | shortestDistance |
| chr3 | 98069301  | 98069691  | 391  | 2.89  | 5.01E-10 | 3.56E-08 | ENSMUSG0000002787Notch2                  | protein_codi | 98013527  | 98150361  | inside       | 55969  | 55774 | shortestDistance |
| chr3 | 98356764  | 98357469  | 706  | 2.06  | 5.23E-07 | 1.36E-05 | ENSMUSG0000005339Pghd1                   | protein_codi | 98313170  | 98339901  | upstream     | -17126 | 16774 | shortestDistance |
| chr3 | 98895259  | 98895820  | 562  | -1.03 | 0.00987  | 0.042    | ENSMUSG0000000787Hao2                    | protein_codi | 98874521  | 98893239  | upstream     | -2301  | 2020  | shortestDistance |
| chr3 | 98941074  | 98942027  | 954  | -1.05 | 0.00287  | 0.0162   | ENSMUSG00000008515730437C11linrRNA       | linrRNA      | 98937649  | 98941256  | overlapStart | -294   | 182   | shortestDistance |
| chr3 | 98975621  | 98976313  | 693  | -1.49 | 3.40E-05 | 0.00046  | ENSMUSG00000008515730437C11linrRNA       | linrRNA      | 98937649  | 98941256  | upstream     | -34711 | 34365 | shortestDistance |
| chr3 | 98990648  | 98991581  | 934  | -2.65 | 2.87E-10 | 2.23E-08 | ENSMUSG00000008515730437C11linrRNA       | linrRNA      | 98937649  | 98941256  | upstream     | -49858 | 49392 | shortestDistance |
| chr3 | 99167768  | 99168038  | 271  | -1.41 | 0.000897 | 0.00654  | ENSMUSG0000000423Wars2                   | protein_codi | 99141068  | 99239186  | inside       | 26835  | 26700 | shortestDistance |
| chr3 | 99174692  | 99175347  | 656  | -0.94 | 0.00474  | 0.0239   | ENSMUSG0000000423Wars2                   | protein_codi | 99141068  | 99239186  | inside       | 33952  | 33624 | shortestDistance |
| chr3 | 99240869  | 99241658  | 790  | -0.94 | 0.00596  | 0.0285   | ENSMUSG0000002786Tbx15                   | protein_codi | 99240381  | 99354259  | inside       | 883    | 488   | shortestDistance |
| chr3 | 99262012  | 99262276  | 265  | -1.16 | 0.00194  | 0.012    | ENSMUSG0000002786Tbx15                   | protein_codi | 99240381  | 99354259  | inside       | 21763  | 21631 | shortestDistance |
| chr3 | 99264579  | 99265306  | 728  | -1.61 | 0.00193  | 0.012    | ENSMUSG0000002786Tbx15                   | protein_codi | 99240381  | 99354259  | inside       | 24561  | 24198 | shortestDistance |
| chr3 | 99884828  | 99885948  | 1121 | -1.38 | 7.07E-06 | 0.000123 | ENSMUSG0000002786Spag17                  | protein_codi | 99885406  | 100143322 | overlapStart | -18    | 542   | shortestDistance |
| chr3 | 99936198  | 99936490  | 293  | -1.21 | 0.00107  | 0.00754  | ENSMUSG0000002786Spag17                  | protein_codi | 99885406  | 100143322 | inside       | 50938  | 50792 | shortestDistance |
| chr3 | 99938952  | 99939321  | 280  | -1.33 | 0.00111  | 0.00772  | ENSMUSG0000002786Spag17                  | protein_codi | 99885406  | 100143322 | inside       | 53686  | 53546 | shortestDistance |
| chr3 | 10017596  | 100176440 | 745  | 0.94  | 0.0093   | 0.0402   | ENSMUSG0000002786Gdap2                   | protein_codi | 100162381 | 100206981 | inside       | 13687  | 13315 | shortestDistance |
| chr3 | 100431588 | 100432142 | 555  | 2.02  | 6.04E-06 | 0.000108 | ENSMUSG0000008692493046018               | processed_tr | 100426405 | 100437754 | inside       | 5460   | 5183  | shortestDistance |
| chr3 | 100440681 | 100441094 | 414  | 1.33  | 0.00338  | 0.0184   | ENSMUSG0000010663Gm43121                 | linrRNA      | 100437834 | 100439138 | downstream   | 3054   | 1543  | shortestDistance |
| chr3 | 100501885 | 100502234 | 350  | 2.31  | 4.69E-07 | 1.24E-05 | ENSMUSG0000005395Gm12474                 | linrRNA      | 100489664 | 100523920 | inside       | 12396  | 12221 | shortestDistance |
| chr3 | 100502466 | 100502887 | 422  | 1.6   | 2.79E-05 | 0.000389 | ENSMUSG0000005395Gm12474                 | linrRNA      | 100489664 | 100523920 | inside       | 13012  | 12802 | shortestDistance |
| chr3 | 100618485 | 100618922 | 438  | 2.95  | 1.34E-10 | 1.18E-08 | ENSMUSG0000000876Man1a2                  | protein_codi | 100562208 | 100685503 | inside       | 66799  | 56277 | shortestDistance |
| chr3 | 100771446 | 100771855 | 410  | -0.9  | 0.01     | 0.0425   | ENSMUSG0000000876Man1a2                  | misc_RNA     | 100738452 | 100738713 | upstream     | -32937 | 32733 | shortestDistance |
| chr3 | 100786052 | 100786478 | 427  | -1.1  | 0.00293  | 0.0165   | ENSMUSG0000005107Vtcn1                   |              |           |           |              |        |       |                  |





|      |           |           |      |       |          |          |                   |                |              |           |           |              |        |        |                  |
|------|-----------|-----------|------|-------|----------|----------|-------------------|----------------|--------------|-----------|-----------|--------------|--------|--------|------------------|
| chr3 | 129279340 | 129279848 | 509  | 3.15  | 2.46E-10 | 1.97E-08 | ENSMUSG0000002802 | Enpep          | protein_codi | 129269175 | 129332720 | inside       | 53126  | 10165  | shortestDistance |
| chr3 | 129295864 | 129296395 | 532  | 2.86  | 9.97E-11 | 9.22E-09 | ENSMUSG0000002802 | Enpep          | protein_codi | 129269175 | 129332720 | inside       | 36590  | 26689  | shortestDistance |
| chr3 | 129296822 | 129297368 | 547  | 2.2   | 3.98E-10 | 2.93E-08 | ENSMUSG0000002802 | Enpep          | protein_codi | 129269175 | 129332720 | inside       | 35625  | 27647  | shortestDistance |
| chr3 | 129332473 | 129333007 | 535  | -1    | 0.0106   | 0.0443   | ENSMUSG0000002802 | Enpep          | protein_codi | 129269175 | 129332720 | overlapStart | -20    | 247    | shortestDistance |
| chr3 | 129481350 | 129481671 | 322  | 2.11  | 4.58E-05 | 0.000588 | ENSMUSG0000010625 | Rpl7a-ps7      | processed_p  | 129461972 | 129462747 | downstream   | 19538  | 18603  | shortestDistance |
| chr3 | 129572973 | 129573440 | 468  | 1.31  | 0.00121  | 0.00828  | ENSMUSG0000004122 | Elovl6         | protein_codi | 129532355 | 129638495 | inside       | 40851  | 40618  | shortestDistance |
| chr3 | 129602061 | 129602886 | 826  | -1.12 | 0.00101  | 0.0072   | ENSMUSG0000004122 | Elovl6         | protein_codi | 129532355 | 129638495 | inside       | 70119  | 35609  | shortestDistance |
| chr3 | 129612350 | 129613124 | 775  | 1.06  | 0.00148  | 0.00971  | ENSMUSG0000004122 | Elovl6         | protein_codi | 129532355 | 129638495 | inside       | 80382  | 25371  | shortestDistance |
| chr3 | 129613782 | 129614072 | 291  | 1.2   | 0.000663 | 0.00516  | ENSMUSG0000004122 | Elovl6         | protein_codi | 129532355 | 129638495 | inside       | 81572  | 24423  | shortestDistance |
| chr3 | 129622189 | 129622444 | 256  | 1.55  | 0.000532 | 0.00433  | ENSMUSG0000004122 | Elovl6         | protein_codi | 129532355 | 129638495 | inside       | 89961  | 16051  | shortestDistance |
| chr3 | 129634529 | 129634814 | 286  | -1.9  | 2.13E-05 | 0.000311 | ENSMUSG0000004122 | Elovl6         | protein_codi | 129532355 | 129638495 | inside       | 102317 | 3681   | shortestDistance |
| chr3 | 129658712 | 129659260 | 549  | 1.23  | 0.00118  | 0.00813  | ENSMUSG0000002801 | Egf            | protein_codi | 129677565 | 129755316 | downstream   | 96330  | 18305  | shortestDistance |
| chr3 | 129903425 | 129903654 | 230  | -1.04 | 0.00262  | 0.0151   | ENSMUSG0000002799 | Casp6          | protein_codi | 129901425 | 129914103 | inside       | 2115   | 2000   | shortestDistance |
| chr3 | 129904665 | 129905268 | 604  | 1.31  | 0.00156  | 0.0101   | ENSMUSG0000002799 | Casp6          | protein_codi | 129901425 | 129914103 | inside       | 3541   | 3240   | shortestDistance |
| chr3 | 129936502 | 129936969 | 468  | 4.02  | 3.21E-15 | 1.65E-12 | ENSMUSG0000002799 | Mclub          | protein_codi | 129914960 | 129970206 | inside       | 33470  | 21542  | shortestDistance |
| chr3 | 129953050 | 129953593 | 544  | 2.65  | 3.77E-08 | 1.46E-06 | ENSMUSG0000002799 | Mclub          | protein_codi | 129914960 | 129970206 | inside       | 16884  | 16613  | shortestDistance |
| chr3 | 130013010 | 130013241 | 232  | -1.28 | 0.00537  | 0.0263   | ENSMUSG0000000105 | Sec24b         | protein_codi | 129982759 | 130061553 | inside       | 48427  | 30251  | shortestDistance |
| chr3 | 130072951 | 130073825 | 875  | 0.97  | 0.00354  | 0.0191   | ENSMUSG0000006332 | Gm9396         | processed_p  | 130068412 | 130068978 | downstream   | 4976   | 3973   | shortestDistance |
| chr3 | 130103544 | 130103820 | 277  | 1.25  | 0.00981  | 0.0419   | ENSMUSG0000010607 | Gm42663        | processed_p  | 130080779 | 130081129 | downstream   | 22903  | 22415  | shortestDistance |
| chr3 | 130125995 | 130126289 | 295  | -1.24 | 0.00471  | 0.0238   | ENSMUSG0000005889 | Col25a1        | protein_codi | 130131501 | 130599877 | upstream     | -5359  | 5212   | shortestDistance |
| chr3 | 130180190 | 130181075 | 886  | -0.81 | 0.00895  | 0.039    | ENSMUSG0000005889 | Col25a1        | protein_codi | 130131501 | 130599877 | inside       | 49131  | 46889  | shortestDistance |
| chr3 | 130241534 | 130242280 | 747  | 1.14  | 0.00237  | 0.014    | ENSMUSG0000005889 | Col25a1        | protein_codi | 130131501 | 130599877 | inside       | 110406 | 110033 | shortestDistance |
| chr3 | 130366988 | 130367686 | 699  | 3.12  | 5.38E-13 | 1.11E-10 | ENSMUSG0000005889 | Col25a1        | protein_codi | 130131501 | 130599877 | inside       | 235836 | 232191 | shortestDistance |
| chr3 | 130436734 | 130437344 | 611  | -1.74 | 0.000179 | 0.00181  | ENSMUSG0000005889 | Col25a1        | protein_codi | 130131501 | 130599877 | inside       | 305538 | 162533 | shortestDistance |
| chr3 | 130481425 | 130481705 | 281  | -1.06 | 0.009    | 0.0392   | ENSMUSG0000005889 | Col25a1        | protein_codi | 130131501 | 130599877 | inside       | 350064 | 118172 | shortestDistance |
| chr3 | 130803610 | 130804224 | 615  | -0.82 | 0.00993  | 0.0422   | ENSMUSG0000010578 | Gm42997        | lincRNA      | 130730460 | 130771643 | downstream   | 73457  | 31967  | shortestDistance |
| chr3 | 130945966 | 130946552 | 757  | -1.25 | 0.00028  | 0.00259  | ENSMUSG0000010609 | 2010110614     | lincRNA      | 130838455 | 130937337 | upstream     | -8837  | 8459   | shortestDistance |
| chr3 | 131013971 | 131014828 | 858  | 1.28  | 0.000193 | 0.00192  | ENSMUSG0000010485 | A430072C101TEC | TEC          | 131023839 | 131026370 | downstream   | 11970  | 9011   | shortestDistance |
| chr3 | 131057772 | 131057713 | 642  | -0.87 | 0.00386  | 0.0204   | ENSMUSG0000010485 | A430072C101TEC | TEC          | 131023839 | 131026370 | upstream     | -31022 | 30702  | shortestDistance |
| chr3 | 131077799 | 131078423 | 625  | 1.09  | 0.00324  | 0.0178   | ENSMUSG0000010608 | Gm43352        | antisense_RI | 131110926 | 131112090 | downstream   | 33979  | 30603  | shortestDistance |
| chr3 | 131157353 | 131158051 | 699  | -0.94 | 0.00487  | 0.0244   | ENSMUSG0000002798 | Lef1           | protein_codi | 131110471 | 131224356 | inside       | 47231  | 46882  | shortestDistance |
| chr3 | 131228168 | 131228413 | 246  | 1.66  | 0.00437  | 0.0224   | ENSMUSG0000002798 | Lef1           | protein_codi | 131110471 | 131224356 | downstream   | 117819 | 3812   | shortestDistance |
| chr3 | 131295536 | 131296209 | 674  | 1.34  | 0.00558  | 0.0271   | ENSMUSG0000002798 | Cyp2u1         | protein_codi | 131288441 | 131303227 | inside       | 7355   | 7018   | shortestDistance |
| chr3 | 131368291 | 131369084 | 794  | 3.33  | 1.49E-16 | 1.44E-13 | ENSMUSG0000005093 | Gsmg2          | protein_codi | 131318985 | 131491411 | inside       | 122723 | 49306  | shortestDistance |
| chr3 | 131465994 | 131466708 | 715  | 2.12  | 5.82E-08 | 2.11E-06 | ENSMUSG0000005093 | Gsmg2          | protein_codi | 131318985 | 131491411 | inside       | 25060  | 24703  | shortestDistance |
| chr3 | 131470926 | 131471260 | 335  | 1.89  | 1.82E-05 | 0.000273 | ENSMUSG0000005093 | Gsmg2          | protein_codi | 131318985 | 131491411 | inside       | 20318  | 20151  | shortestDistance |
| chr3 | 131474335 | 131474987 | 653  | 3.46  | 4.25E-14 | 1.34E-11 | ENSMUSG0000005093 | Gsmg2          | protein_codi | 131318985 | 131491411 | inside       | 16750  | 16424  | shortestDistance |
| chr3 | 131475937 | 131476363 | 427  | 3.01  | 1.30E-09 | 8.07E-08 | ENSMUSG0000005093 | Gsmg2          | protein_codi | 131318985 | 131491411 | inside       | 15261  | 15048  | shortestDistance |
| chr3 | 131481931 | 131482667 | 737  | 3.49  | 1.05E-09 | 6.75E-08 | ENSMUSG0000005093 | Gsmg2          | protein_codi | 131318985 | 131491411 | inside       | 9112   | 8744   | shortestDistance |
| chr3 | 131570386 | 131570850 | 465  | -2.32 | 7.43E-08 | 2.58E-06 | ENSMUSG0000002803 | Papp1          | protein_codi | 131564768 | 131643671 | inside       | 5850   | 5618   | shortestDistance |
| chr3 | 131698064 | 131698675 | 612  | 1.34  | 0.000567 | 0.00456  | ENSMUSG0000002803 | Papp1          | protein_codi | 131564768 | 131643671 | downstream   | 133602 | 54393  | shortestDistance |
| chr3 | 131713592 | 131713852 | 261  | 1.5   | 0.00396  | 0.0208   | ENSMUSG0000010533 | Gm29865        | lincRNA      | 131759805 | 132030743 | upstream     | -46083 | 45953  | shortestDistance |
| chr3 | 131813070 | 131813302 | 233  | -1.68 | 0.000277 | 0.00257  | ENSMUSG0000010533 | Gm29865        | lincRNA      | 131759805 | 132030743 | inside       | 53381  | 53265  | shortestDistance |
| chr3 | 131941942 | 131942653 | 712  | -1.67 | 7.13E-05 | 0.000844 | ENSMUSG0000010533 | Gm29865        | lincRNA      | 131759805 | 132030743 | inside       | 182493 | 88090  | shortestDistance |
| chr3 | 132050829 | 132051531 | 703  | -1.53 | 8.16E-06 | 0.000139 | ENSMUSG0000010533 | Gm29865        | lincRNA      | 131759805 | 132030743 | downstream   | 291375 | 20086  | shortestDistance |
| chr3 | 132064011 | 132064304 | 294  | 1.98  | 0.00019  | 0.0019   | ENSMUSG0000006499 | Gm22421        | snRNA        | 132082286 | 132082392 | downstream   | 18234  | 17982  | shortestDistance |
| chr3 | 132064914 | 132065328 | 415  | 1.91  | 0.00014  | 0.00148  | ENSMUSG0000006499 | Gm22421        | snRNA        | 132082286 | 132082392 | downstream   | 17271  | 16958  | shortestDistance |
| chr3 | 132084059 | 132084399 | 341  | -1.83 | 9.24E-07 | 2.20E-05 | ENSMUSG0000002803 | Dkk2           | protein_codi | 132085292 | 132180304 | upstream     | -1063  | 893    | shortestDistance |
| chr3 | 132085198 | 132085507 | 310  | -1.15 | 0.00138  | 0.00918  | ENSMUSG0000002803 | Dkk2           | protein_codi | 132085292 | 132180304 | overlapStart | 60     | 94     | shortestDistance |
| chr3 | 132103405 | 132103856 | 452  | 2.11  | 1.91E-06 | 4.05E-05 | ENSMUSG0000002803 | Dkk2           | protein_codi | 132085292 | 132180304 | inside       | 18338  | 18113  | shortestDistance |
| chr3 | 132248126 | 132428540 | 415  | -1.72 | 0.000109 | 0.0012   | ENSMUSG0000010628 | Gm42880        | lincRNA      | 132443673 | 132445548 | downstream   | 17215  | 15133  | shortestDistance |
| chr3 | 132505978 | 132506509 | 532  | -0.93 | 0.0022   | 0.0132   | ENSMUSG0000008951 | Gm25307        | snRNA        | 132537560 | 132537665 | downstream   | 31421  | 31051  | shortestDistance |
| chr3 | 132791183 | 132791560 | 378  | -1.08 | 0.00982  | 0.0419   | ENSMUSG0000002803 | Tbck           | protein_codi | 132684144 | 132841688 | inside       | 107228 | 50128  | shortestDistance |
| chr3 | 132819361 | 132819818 | 458  | -1.39 | 0.00396  | 0.0208   | ENSMUSG0000002803 | Tbck           | protein_codi | 132684144 | 132841688 | inside       | 135446 | 21870  | shortestDistance |
| chr3 | 132886462 | 132887703 | 1242 | -1.21 | 0.000546 | 0.00442  | ENSMUSG0000004099 | Npnt           | protein_codi | 132881745 | 132950291 | inside       | 63209  | 4717   | shortestDistance |
| chr3 | 132932166 | 132932626 | 461  | -1.26 | 0.000735 | 0.00559  | ENSMUSG0000004099 | Npnt           | protein_codi | 132881745 | 132950291 | inside       | 17895  | 17665  | shortestDistance |
| chr3 | 133103783 | 133104139 | 357  | 1.91  | 0.000164 | 0.00168  | ENSMUSG0000002801 | Ints12         | protein_codi | 133091840 | 133110988 | inside       | 12121  | 6849   | shortestDistance |
| chr3 | 133111686 | 133112125 | 440  | 1.36  | 0.00154  | 0.00999  | ENSMUSG0000004096 | Arhgef38       | protein_codi | 133112278 | 133234949 | downstream   | 123043 | 153    | shortestDistance |
| chr3 | 133125274 | 133125995 | 722  | 2.72  | 1.52E-10 | 1.31E-08 | ENSMUSG0000004096 | Arhgef38       | protein_codi | 133112278 | 133234949 | inside       | 19315  | 18954  | shortestDistance |
| chr3 | 133339113 | 133339941 | 829  | -0.78 | 0.00764  | 0.0346   | ENSMUSG0000002801 | Ppa2           | protein_codi | 133310110 | 133782335 | inside       | 29417  | 29003  | shortestDistance |
| chr3 | 133423058 | 133423491 | 434  | 1.02  | 0.00826  | 0.0367   | ENSMUSG0000008050 | Gm25042        | miRNA        | 133431703 | 133431823 | downstream   | 8549   | 8212   | shortestDistance |
| chr3 | 133436325 | 133437376 | 1052 | 4.2   | 2.46E-22 | 5.00E-18 | ENSMUSG0000008050 | Gm25042        | miRNA        | 133431703 | 133431823 | upstream     | -5027  | 4502   | shortestDistance |
| chr3 | 133525402 | 133526060 | 659  | 0.95  | 0.0112   | 0.0463   | ENSMUSG0000004094 | Tet2           | protein_codi | 133463679 | 133545139 | inside       | 19408  | 19079  | shortestDistance |
| chr3 | 133526190 | 133526685 | 496  | 0.87  | 0.00903  | 0.0393   | ENSMUSG0000004094 | Tet2           | protein_codi | 133463679 | 133545139 | inside       | 18701  | 18454  | shortestDistance |
| chr3 | 133584945 | 133585376 | 432  | 1.88  | 1.41E-07 | 4.44E-06 | ENSMUSG0000010508 | Gm42567        | antisense_RI | 133545097 | 133585053 | overlapEnd   | 40063  | 108    | shortestDistance |
| chr3 | 133626262 | 133627405 | 1144 | 2.69  | 5.23E-12 | 7.57E-10 | ENSMUSG0000010253 | Gm37228        | TEC          | 133623684 | 133634758 | inside       | 7924   | 2578   | shortestDistance |
| chr3 | 133672686 | 133673015 | 330  | -1.37 | 0.000421 | 0.0036   | ENSMUSG0000010595 | Gm40153        | lincRNA      | 133645808 | 133663391 | upstream     | -9459  | 9295   | shortestDistance |
| chr3 | 133711521 | 133711993 | 473  | 1.81  | 2.92E-05 | 0.000405 | ENSMUSG0000010595 | Gm40153        | lincRNA      | 133645808 | 133663391 | upstream     | -48366 | 48130  | shortestDistance |
| chr3 | 133834080 | 133834329 | 250  | -1.61 | 0.0107   | 0.0445   | ENSMUSG0000009791 | Gm26691        | antisense_RI | 133830668 | 134240641 | inside       | 406437 | 3412   |                  |

|      |           |           |      |       |          |          |                   |             |                |           |           |              |        |        |                  |
|------|-----------|-----------|------|-------|----------|----------|-------------------|-------------|----------------|-----------|-----------|--------------|--------|--------|------------------|
| chr3 | 137947609 | 137947903 | 295  | 1.33  | 0.000297 | 0.00272  | ENSMUSG0000002815 | Dapp1       | protein_codi   | 137931007 | 137981545 | inside       | 33789  | 16602  | shortestDistance |
| chr3 | 137952079 | 137953478 | 1400 | 1.14  | 0.000192 | 0.00191  | ENSMUSG0000002815 | Dapp1       | protein_codi   | 137931007 | 137981545 | inside       | 28767  | 21072  | shortestDistance |
| chr3 | 137975463 | 137975933 | 471  | 0.95  | 0.00583  | 0.0281   | ENSMUSG0000002815 | Dapp1       | protein_codi   | 137931007 | 137981545 | inside       | 5847   | 5612   | shortestDistance |
| chr3 | 138061631 | 138062043 | 413  | 1.28  | 0.00543  | 0.0266   | ENSMUSG0000004934 | Gm5105      | protein_codi   | 138048761 | 138067388 | inside       | 5551   | 5345   | shortestDistance |
| chr3 | 138143202 | 138144213 | 1012 | 0.87  | 0.00434  | 0.0223   | ENSMUSG0000000412 | Tmrt10a     | protein_codi   | 138143448 | 138159821 | overlapStart | 260    | 246    | shortestDistance |
| chr3 | 138336223 | 138336583 | 361  | 2.18  | 0.000651 | 0.000651 | ENSMUSG0000005305 | Adh6a       | protein_codi   | 138313286 | 138331134 | downstream   | 23117  | 5089   | shortestDistance |
| chr3 | 138464318 | 138465102 | 785  | 1.7   | 3.69E-06 | 7.09E-05 | ENSMUSG0000000581 | Metap1      | protein_codi   | 138458956 | 138489515 | inside       | 24805  | 5362   | shortestDistance |
| chr3 | 138558590 | 138558908 | 319  | -1.08 | 0.00481  | 0.0241   | ENSMUSG0000002815 | Eif4e       | protein_codi   | 138526179 | 138559696 | inside       | 32570  | 788    | shortestDistance |
| chr3 | 138624151 | 138624405 | 255  | -1.74 | 0.000136 | 0.00144  | ENSMUSG0000010539 | Gm6057      | processed_g    | 138604318 | 138604984 | upstream     | -19294 | 19167  | shortestDistance |
| chr3 | 138686643 | 138687051 | 409  | -1.12 | 0.00749  | 0.034    | ENSMUSG0000010583 | 4930425010  | lincRNA        | 138711535 | 138726984 | downstream   | 40137  | 24484  | shortestDistance |
| chr3 | 138752827 | 138753893 | 1067 | 0.95  | 0.00598  | 0.0286   | ENSMUSG0000002815 | Tspan5      | protein_codi   | 138742195 | 138907905 | inside       | 11165  | 10632  | shortestDistance |
| chr3 | 139048857 | 139049526 | 670  | -1.08 | 0.00174  | 0.0111   | ENSMUSG0000002814 | Rap1gds1    | protein_codi   | 138925902 | 139075201 | inside       | 26009  | 25675  | shortestDistance |
| chr3 | 139671365 | 139671620 | 256  | -1.54 | 0.000582 | 0.00466  | ENSMUSG0000004794 | Stpg2       | protein_codi   | 139205694 | 139710299 | inside       | 465798 | 38679  | shortestDistance |
| chr3 | 139841935 | 139842433 | 499  | 2.61  | 5.58E-11 | 5.62E-09 | ENSMUSG0000010588 | Gm43678     | lincRNA        | 139812111 | 139812764 | upstream     | -29420 | 29171  | shortestDistance |
| chr3 | 139869704 | 139870122 | 419  | 2.69  | 8.90E-11 | 8.39E-09 | ENSMUSG0000010588 | Gm43678     | lincRNA        | 139812111 | 139812764 | upstream     | -57149 | 56940  | shortestDistance |
| chr3 | 139885882 | 139886665 | 784  | 1.23  | 6.03E-05 | 0.00074  | ENSMUSG0000010588 | Gm43678     | lincRNA        | 139812111 | 139812764 | upstream     | -73510 | 73118  | shortestDistance |
| chr3 | 139887353 | 139887665 | 313  | 3.04  | 4.19E-12 | 6.23E-10 | ENSMUSG0000010588 | Gm43678     | lincRNA        | 139812111 | 139812764 | upstream     | -74745 | 74589  | shortestDistance |
| chr3 | 139949416 | 139949416 | 271  | -1.37 | 0.00145  | 0.00956  | ENSMUSG0000009916 | Mir7j       | miRNA          | 140028249 | 140028370 | upstream     | -78968 | 78833  | shortestDistance |
| chr3 | 139986174 | 139986543 | 370  | -2.5  | 3.99E-06 | 7.58E-05 | ENSMUSG0000009916 | Mir7j       | miRNA          | 140028249 | 140028370 | upstream     | -41891 | 41706  | shortestDistance |
| chr3 | 140182764 | 140183194 | 431  | -1.34 | 0.000869 | 0.00638  | ENSMUSG0000010620 | Gm19184     | processed_p    | 140169284 | 140170211 | downstream   | 13695  | 12553  | shortestDistance |
| chr3 | 140230642 | 140231311 | 670  | -1.12 | 0.00255  | 0.0148   | ENSMUSG0000010620 | Gm19184     | processed_p    | 140169284 | 140170211 | downstream   | 61692  | 60431  | shortestDistance |
| chr3 | 140510771 | 140511663 | 893  | -1.67 | 6.75E-05 | 0.000809 | ENSMUSG0000010459 | Gm19080     | processed_p    | 140506718 | 140507267 | upstream     | -3950  | 3504   | shortestDistance |
| chr3 | 140521578 | 140522434 | 857  | -1.76 | 6.12E-05 | 0.000748 | ENSMUSG0000010459 | Gm19080     | processed_p    | 140506718 | 140507267 | upstream     | -14739 | 14311  | shortestDistance |
| chr3 | 140707446 | 140708134 | 689  | -1.4  | 0.000488 | 0.00406  | ENSMUSG0000010577 | Gm43049     | lincRNA        | 140692038 | 140760704 | inside       | 52914  | 15408  | shortestDistance |
| chr3 | 140738771 | 140739500 | 730  | -1.24 | 0.0107   | 0.0447   | ENSMUSG0000010577 | Gm43049     | lincRNA        | 140692038 | 140760704 | inside       | 21568  | 21204  | shortestDistance |
| chr3 | 140782804 | 140783254 | 451  | -2.1  | 2.43E-05 | 0.000347 | ENSMUSG0000010577 | Gm43049     | lincRNA        | 140692038 | 140760704 | upstream     | -22325 | 22100  | shortestDistance |
| chr3 | 140837947 | 140838702 | 756  | -0.97 | 0.00363  | 0.0194   | ENSMUSG0000009946 | Gm6214      | processed_p    | 140839097 | 140839637 | downstream   | 1313   | 395    | shortestDistance |
| chr3 | 140876646 | 140876893 | 248  | -1.87 | 6.94E-05 | 0.000828 | ENSMUSG0000010479 | Gm43276     | processed_p    | 140871173 | 140871536 | upstream     | -5234  | 5110   | shortestDistance |
| chr3 | 140942391 | 140942817 | 427  | 3.07  | 1.16E-10 | 1.05E-08 | ENSMUSG0000010654 | 4930590114F | lincRNA        | 140951876 | 140953247 | upstream     | -9272  | 9059   | shortestDistance |
| chr3 | 141191667 | 141192048 | 382  | 1.26  | 0.00565  | 0.0274   | ENSMUSG0000004767 | Pdha2       | protein_codi   | 141210004 | 141212355 | downstream   | 20467  | 17956  | shortestDistance |
| chr3 | 141503326 | 141503829 | 504  | 2.33  | 1.05E-08 | 4.88E-07 | ENSMUSG0000005992 | Unc5c       | protein_codi   | 141465216 | 141834924 | inside       | 38362  | 38110  | shortestDistance |
| chr3 | 141511611 | 141512205 | 595  | 4.04  | 6.65E-18 | 1.29E-14 | ENSMUSG0000005992 | Unc5c       | protein_codi   | 141465216 | 141834924 | inside       | 46692  | 46395  | shortestDistance |
| chr3 | 141514435 | 141514775 | 341  | -1.77 | 0.000316 | 0.00286  | ENSMUSG0000005992 | Unc5c       | protein_codi   | 141465216 | 141834924 | inside       | 49389  | 49219  | shortestDistance |
| chr3 | 141538114 | 141538565 | 452  | 1.54  | 0.000105 | 0.00116  | ENSMUSG0000005992 | Unc5c       | protein_codi   | 141465216 | 141834924 | inside       | 73124  | 72898  | shortestDistance |
| chr3 | 141553029 | 141553330 | 302  | 2.3   | 5.31E-07 | 1.33E-05 | ENSMUSG0000005992 | Unc5c       | protein_codi   | 141465216 | 141834924 | inside       | 87964  | 87813  | shortestDistance |
| chr3 | 141646636 | 141647146 | 511  | 1.84  | 1.66E-05 | 0.000252 | ENSMUSG0000005992 | Unc5c       | protein_codi   | 141465216 | 141834924 | inside       | 181675 | 181420 | shortestDistance |
| chr3 | 141711583 | 141711971 | 389  | -1.61 | 0.000236 | 0.00226  | ENSMUSG0000005992 | Unc5c       | protein_codi   | 141465216 | 141834924 | inside       | 246561 | 122953 | shortestDistance |
| chr3 | 141745039 | 141745782 | 744  | 1.83  | 1.52E-06 | 3.34E-05 | ENSMUSG0000005992 | Unc5c       | protein_codi   | 141465216 | 141834924 | inside       | 280194 | 89142  | shortestDistance |
| chr3 | 141778178 | 141779581 | 1404 | -1.19 | 0.000344 | 0.00307  | ENSMUSG0000005992 | Unc5c       | protein_codi   | 141465216 | 141834924 | inside       | 313664 | 55343  | shortestDistance |
| chr3 | 141887507 | 141887837 | 331  | -1.2  | 0.00116  | 0.008    | ENSMUSG0000005243 | Bmpr1b      | protein_codi   | 141837136 | 142169425 | inside       | 281753 | 50371  | shortestDistance |
| chr3 | 141950658 | 141951171 | 514  | -1.07 | 0.0018   | 0.0113   | ENSMUSG0000005243 | Bmpr1b      | protein_codi   | 141837136 | 142169425 | inside       | 218511 | 113522 | shortestDistance |
| chr3 | 142273314 | 142273762 | 449  | -1.04 | 0.00569  | 0.0275   | ENSMUSG0000002827 | Pdlim5      | protein_codi   | 142239590 | 142395696 | inside       | 122158 | 33724  | shortestDistance |
| chr3 | 142280784 | 142281487 | 704  | -0.8  | 0.00949  | 0.0408   | ENSMUSG0000002827 | Pdlim5      | protein_codi   | 142239590 | 142395696 | inside       | 114560 | 41194  | shortestDistance |
| chr3 | 142318141 | 142318471 | 331  | -1.82 | 1.94E-05 | 0.000288 | ENSMUSG0000002827 | Pdlim5      | protein_codi   | 142239590 | 142395696 | inside       | 77390  | 77225  | shortestDistance |
| chr3 | 142332147 | 142333156 | 1010 | 0.95  | 0.0111   | 0.0459   | ENSMUSG0000002827 | Pdlim5      | protein_codi   | 142239590 | 142395696 | inside       | 63044  | 62540  | shortestDistance |
| chr3 | 142478334 | 142478791 | 458  | 3.65  | 2.41E-17 | 3.62E-14 | ENSMUSG0000010550 | Gbp5        | protein_codi   | 142493978 | 142522344 | upstream     | -15416 | 15187  | shortestDistance |
| chr3 | 142881197 | 142882682 | 1486 | 0.78  | 0.0101   | 0.0427   | ENSMUSG0000010655 | Gm43646     | processed_tr   | 142881588 | 142898245 | overlapStart | 352    | 391    | shortestDistance |
| chr3 | 142940785 | 142941330 | 546  | 3.09  | 3.65E-09 | 1.94E-07 | ENSMUSG0000007816 | Gm2574      | processed_p    | 142962611 | 142963612 | upstream     | -21553 | 21281  | shortestDistance |
| chr3 | 143016683 | 143017555 | 873  | 0.99  | 0.000808 | 0.00603  | ENSMUSG0000010565 | 4930519102F | lincRNA        | 143017660 | 143040752 | upstream     | -541   | 105    | shortestDistance |
| chr3 | 143040665 | 143041113 | 449  | 3.85  | 5.81E-16 | 4.10E-13 | ENSMUSG0000010565 | 4930519102F | lincRNA        | 143017660 | 143040752 | overlapEnd   | 23229  | 87     | shortestDistance |
| chr3 | 143147370 | 143148078 | 709  | 0.97  | 0.00158  | 0.0102   | ENSMUSG0000010605 | Gm43614     | lincRNA        | 143107948 | 143157903 | inside       | 39776  | 9825   | shortestDistance |
| chr3 | 143599148 | 143599441 | 294  | -1.1  | 0.00351  | 0.0189   | ENSMUSG0000010551 | Gm33758     | lincRNA        | 143603805 | 143624575 | upstream     | -4511  | 4364   | shortestDistance |
| chr3 | 143622742 | 143622709 | 468  | 2.14  | 1.17E-07 | 3.81E-06 | ENSMUSG0000010551 | Gm33758     | lincRNA        | 143603805 | 143624575 | inside       | 18671  | 1866   | shortestDistance |
| chr3 | 143624834 | 143625349 | 516  | 2.93  | 5.02E-14 | 1.54E-11 | ENSMUSG0000010551 | Gm33758     | lincRNA        | 143603805 | 143624575 | downstream   | 21287  | 259    | shortestDistance |
| chr3 | 143646662 | 143647580 | 919  | -1.05 | 0.000568 | 0.00456  | ENSMUSG0000010381 | Gm38006     | TEC            | 143644890 | 143650953 | inside       | 2231   | 1772   | shortestDistance |
| chr3 | 143685633 | 143686203 | 571  | 1.54  | 8.84E-05 | 0.001    | ENSMUSG0000010527 | Gm6260      | lincRNA        | 143670892 | 143712210 | inside       | 26292  | 14741  | shortestDistance |
| chr3 | 143719022 | 143719280 | 259  | -1.48 | 0.00399  | 0.0209   | ENSMUSG0000010527 | Gm6260      | lincRNA        | 143670892 | 143712210 | upstream     | -6941  | 6812   | shortestDistance |
| chr3 | 143873897 | 143874378 | 482  | 1.11  | 0.00824  | 0.0367   | ENSMUSG0000010549 | Gm2505      | processed_p    | 143872995 | 143873819 | downstream   | 1143   | 78     | shortestDistance |
| chr3 | 143912400 | 143912844 | 545  | 2.99  | 1.79E-12 | 2.99E-10 | ENSMUSG0000010581 | Gm42707     | lincRNA        | 143878393 | 143954774 | inside       | 42102  | 34007  | shortestDistance |
| chr3 | 144041798 | 144042175 | 378  | 2.25  | 8.34E-07 | 2.02E-05 | ENSMUSG0000010636 | Gm34078     | lincRNA        | 144101904 | 144135754 | downstream   | 93768  | 59729  | shortestDistance |
| chr3 | 144109751 | 144111103 | 1353 | 2.99  | 3.11E-16 | 2.45E-13 | ENSMUSG0000010636 | Gm34078     | lincRNA        | 144101904 | 144135754 | inside       | 25327  | 7847   | shortestDistance |
| chr3 | 144138578 | 144139044 | 467  | 3.53  | 5.65E-13 | 1.14E-10 | ENSMUSG0000010636 | Gm34078     | lincRNA        | 144101904 | 144135754 | upstream     | -3057  | 2824   | shortestDistance |
| chr3 | 144352613 | 144353071 | 459  | 3.66  | 1.01E-14 | 4.19E-12 | ENSMUSG0000010626 | Gm43447     | lincRNA        | 144320214 | 144321748 | downstream   | 32628  | 30865  | shortestDistance |
| chr3 | 144356034 | 144356652 | 619  | 0.84  | 0.0123   | 0.0496   | ENSMUSG0000010626 | Gm43447     | lincRNA        | 144320214 | 144321748 | downstream   | 36129  | 34286  | shortestDistance |
| chr3 | 144376025 | 144376387 | 363  | 2.76  | 7.33E-09 | 3.57E-07 | ENSMUSG0000010641 | Gm5857      | processed_p    | 144427180 | 144427672 | downstream   | 51466  | 50793  | shortestDistance |
| chr3 | 144428455 | 144428956 | 502  | -1.28 | 0.00382  | 0.0202   | ENSMUSG0000004015 | Hs2st1      | protein_codi   | 144429706 | 144570181 | downstream   | 141475 | 750    | shortestDistance |
| chr3 | 144496803 | 144497104 | 302  | 2.75  | 8.99E-07 | 2.14E-05 | ENSMUSG0000010490 | Gm43707     | sense_intron   | 144493986 | 144497172 | inside       | 218    | 68     | shortestDistance |
| chr3 | 144537082 | 144537442 | 361  | 2.47  | 2.92E-06 | 4.73E-05 | ENSMUSG0000004015 | Hs2st1      | protein_codi   | 144429706 | 144570181 | inside       | 32919  | 32739  | shortestDistance |
| chr3 | 144606465 | 144606782 | 318  | 1.37  | 0.00149  | 0.00975  | ENSMUSG0000003077 | Selenof     | protein_codi</ |           |           |              |        |        |                  |

|      |           |           |      |       |          |          |                    |            |              |           |           |              |        |        |                  |
|------|-----------|-----------|------|-------|----------|----------|--------------------|------------|--------------|-----------|-----------|--------------|--------|--------|------------------|
| chr3 | 149637857 | 149638710 | 854  | -1.62 | 1.32E-06 | 2.96E-05 | ENSMUSG0000010478  | Gm31121    | lincRNA      | 149562882 | 149660396 | inside       | 22112  | 21686  | shortestDistance |
| chr3 | 150130395 | 150130834 | 440  | 2.37  | 5.49E-08 | 2.00E-06 | ENSMUSG0000004767  | Rpsa-ps10  | processed_p  | 150072658 | 150073542 | upstream     | -57072 | 56853  | shortestDistance |
| chr3 | 150401813 | 150402350 | 538  | -1.24 | 0.000886 | 0.00647  | ENSMUSG0000010577  | Gm6439     | processed_p  | 150515220 | 150516081 | downstream   | 113999 | 112870 | shortestDistance |
| chr3 | 151002019 | 151002399 | 381  | -0.99 | 0.00552  | 0.0269   | ENSMUSG0000009283  | Mir3963    | miRNA        | 151023792 | 151023862 | downstream   | 21653  | 21393  | shortestDistance |
| chr3 | 151214258 | 151214673 | 416  | -1.16 | 0.00562  | 0.0273   | ENSMUSG0000010615  | 4930555A03 | lincRNA      | 151294126 | 151296641 | upstream     | -79660 | 79453  | shortestDistance |
| chr3 | 151298300 | 151298666 | 367  | 1.04  | 0.00942  | 0.0406   | ENSMUSG0000010615  | 4930555A03 | lincRNA      | 151294126 | 151296641 | downstream   | 4357   | 1659   | shortestDistance |
| chr3 | 151348446 | 151385201 | 356  | 1.95  | 1.90E-06 | 4.04E-05 | ENSMUSG0000010540  | Gm42949    | lincRNA      | 151333349 | 151337638 | downstream   | 51675  | 47208  | shortestDistance |
| chr3 | 151416674 | 151417103 | 430  | 1.55  | 0.000161 | 0.00165  | ENSMUSG0000003916  | Adgrl4     | protein_codi | 151437887 | 151545086 | upstream     | -20999 | 20784  | shortestDistance |
| chr3 | 151424208 | 151425196 | 989  | 0.87  | 0.00615  | 0.0292   | ENSMUSG0000003916  | Adgrl4     | protein_codi | 151437887 | 151545086 | upstream     | -13185 | 12691  | shortestDistance |
| chr3 | 151444264 | 151444661 | 398  | 0.9   | 0.00419  | 0.0217   | ENSMUSG0000003916  | Adgrl4     | protein_codi | 151437887 | 151545086 | inside       | 6575   | 6377   | shortestDistance |
| chr3 | 151557134 | 151557629 | 496  | -1.11 | 0.0051   | 0.0253   | ENSMUSG0000003916  | Adgrl4     | protein_codi | 151437887 | 151545086 | downstream   | 119495 | 12048  | shortestDistance |
| chr3 | 151868850 | 151869309 | 460  | 3.01  | 8.89E-13 | 1.65E-10 | ENSMUSG0000010490  | Gm43617    | lincRNA      | 151887303 | 151895101 | upstream     | -18223 | 17994  | shortestDistance |
| chr3 | 151892093 | 151892420 | 328  | -1.48 | 0.00323  | 0.0178   | ENSMUSG0000010490  | Gm43617    | lincRNA      | 151887303 | 151895101 | inside       | 4953   | 2681   | shortestDistance |
| chr3 | 152209632 | 152211235 | 1604 | 0.95  | 0.00583  | 0.028    | ENSMUSG0000002803  | Fubp1      | protein_codi | 152210422 | 152236826 | overlapStart | 12     | 790    | shortestDistance |
| chr3 | 152238915 | 152239206 | 292  | 1.77  | 0.000158 | 0.00163  | ENSMUSG0000003910  | Nxn        | protein_codi | 152236982 | 152266350 | inside       | 27290  | 1933   | shortestDistance |
| chr3 | 152569081 | 152569670 | 590  | -0.94 | 0.00523  | 0.0258   | ENSMUSG0000003905  | Aks        | protein_codi | 152462815 | 152683660 | inside       | 98984  | 98690  | shortestDistance |
| chr3 | 152722890 | 152723189 | 300  | -1.48 | 0.000152 | 0.00157  | ENSMUSG0000003904  | Pigk       | protein_codi | 152714100 | 152980408 | inside       | 8940   | 8790   | shortestDistance |
| chr3 | 152831423 | 152831759 | 337  | -1.33 | 0.00188  | 0.0117   | ENSMUSG0000003904  | Pigk       | protein_codi | 152714100 | 152980408 | inside       | 117491 | 117323 | shortestDistance |
| chr3 | 153085138 | 153085521 | 384  | -1.27 | 0.00106  | 0.00748  | ENSMUSG0000010533  | 1700094M23 | lincRNA      | 153162728 | 153182815 | downstream   | 97485  | 77207  | shortestDistance |
| chr3 | 153190009 | 153190512 | 504  | 1.57  | 9.12E-06 | 0.000153 | ENSMUSG0000010533  | 1700094M23 | lincRNA      | 153162728 | 153182815 | upstream     | -7445  | 7194   | shortestDistance |
| chr3 | 153261947 | 153262380 | 434  | 1.22  | 0.00365  | 0.0195   | ENSMUSG0000000525  | St6galnac3 | protein_codi | 153198266 | 153725174 | inside       | 463010 | 63681  | shortestDistance |
| chr3 | 153292853 | 153293272 | 420  | 2.5   | 4.81E-10 | 3.44E-08 | ENSMUSG0000000525  | St6galnac3 | protein_codi | 153198266 | 153725174 | inside       | 432112 | 94587  | shortestDistance |
| chr3 | 153313654 | 153314061 | 408  | 1.67  | 4.28E-06 | 8.04E-05 | ENSMUSG0000000911  | Gm27405    | miRNA        | 153313713 | 153313824 | includeFeatu | 145    | 59     | shortestDistance |
| chr3 | 153480023 | 153480945 | 923  | 1.33  | 0.000269 | 0.00251  | ENSMUSG0000000525  | St6galnac3 | protein_codi | 153198266 | 153725174 | inside       | 244690 | 244229 | shortestDistance |
| chr3 | 153755709 | 153756227 | 519  | 1.68  | 7.92E-07 | 1.93E-05 | ENSMUSG0000010601  | Gm43833    | processed_p  | 153749299 | 153749591 | downstream   | 6669   | 6118   | shortestDistance |
| chr3 | 153790405 | 153792509 | 2105 | 0.96  | 0.00547  | 0.0267   | ENSMUSG0000006204  | 5730460C07 | lincRNA      | 153789305 | 153792087 | overlapStart | 630    | 422    | shortestDistance |
| chr3 | 153806346 | 153806892 | 529  | 1.2   | 0.00219  | 0.0132   | ENSMUSG0000006204  | 5730460C07 | lincRNA      | 153789305 | 153792087 | upstream     | -14541 | 14277  | shortestDistance |
| chr3 | 153889183 | 153889729 | 547  | 2.08  | 2.83E-07 | 8.09E-06 | ENSMUSG0000000549  | Msh4       | protein_codi | 153857149 | 153906138 | inside       | 16682  | 16409  | shortestDistance |
| chr3 | 153904610 | 153905356 | 747  | 1.48  | 5.45E-05 | 0.000678 | ENSMUSG0000000549  | Msh4       | protein_codi | 153857149 | 153906138 | inside       | 1155   | 782    | shortestDistance |
| chr3 | 153968535 | 153968984 | 449  | 1.13  | 0.00196  | 0.0121   | ENSMUSG0000002836  | Slc44a5    | protein_codi | 153973436 | 154271722 | upstream     | -4676  | 4452   | shortestDistance |
| chr3 | 154093751 | 154094402 | 652  | -0.95 | 0.00997  | 0.0424   | ENSMUSG0000002836  | Slc44a5    | protein_codi | 153973436 | 154271722 | inside       | 120640 | 120315 | shortestDistance |
| chr3 | 154548956 | 154549251 | 296  | -0.95 | 0.00787  | 0.0354   | ENSMUSG0000000478  | Tyw3       | protein_codi | 154576431 | 154597104 | downstream   | 48000  | 27180  | shortestDistance |
| chr3 | 154663620 | 154664481 | 862  | -1.35 | 3.42E-05 | 0.000461 | ENSMUSG0000000478  | Erich3     | protein_codi | 154663859 | 154767790 | overlapStart | 191    | 239    | shortestDistance |
| chr3 | 154752427 | 154752669 | 243  | -1.3  | 0.00876  | 0.0384   | ENSMUSG0000000478  | Erich3     | protein_codi | 154663859 | 154767790 | inside       | 88689  | 15121  | shortestDistance |
| chr3 | 154919136 | 154919416 | 281  | -1.36 | 0.00116  | 0.00803  | ENSMUSG0000000408  | Tnni3k     | protein_codi | 154786291 | 155055407 | inside       | 136131 | 132845 | shortestDistance |
| chr3 | 154949645 | 154949931 | 287  | -2.11 | 0.00117  | 0.0081   | ENSMUSG0000000408  | Tnni3k     | protein_codi | 154786291 | 155055407 | inside       | 105619 | 105476 | shortestDistance |
| chr3 | 155234933 | 155235255 | 323  | -1.11 | 0.00115  | 0.00799  | ENSMUSG0000000408  | Lrrri4j    | protein_codi | 155093434 | 155194280 | downstream   | 141660 | 40653  | shortestDistance |
| chr3 | 155351698 | 155351978 | 281  | -1.17 | 0.00374  | 0.0199   | ENSMUSG0000010351  | Gm5285     | processed_p  | 155276058 | 155276723 | upstream     | -75115 | 74975  | shortestDistance |
| chr3 | 155530874 | 155531232 | 359  | -2.29 | 7.39E-06 | 0.000128 | ENSMUSG0000010329  | Scp2-ps1   | unprocessed  | 155514441 | 155515311 | downstream   | 16612  | 15563  | shortestDistance |
| chr3 | 155776068 | 155776365 | 298  | -1.46 | 0.000464 | 0.0039   | ENSMUSG0000010432  | Gm37324    | TEC          | 155771325 | 155775828 | upstream     | -388   | 240    | shortestDistance |
| chr3 | 156082249 | 156082619 | 371  | -1.05 | 0.00416  | 0.0216   | ENSMUSG0000010594  | Gm6510     | processed_p  | 156060891 | 156062063 | downstream   | 21543  | 20186  | shortestDistance |
| chr3 | 156235962 | 156236643 | 682  | -1.53 | 7.81E-06 | 0.000134 | ENSMUSG0000010457  | Gm42886    | processed_p  | 156264586 | 156265051 | upstream     | -28284 | 27943  | shortestDistance |
| chr3 | 156410034 | 156410638 | 605  | -1.3  | 0.00103  | 0.00729  | ENSMUSG0000000858  | 4930555A03 | lincRNA      | 156546753 | 156561746 | downstream   | 151410 | 136115 | shortestDistance |
| chr3 | 157272397 | 157272913 | 517  | 3.24  | 5.07E-16 | 3.70E-13 | ENSMUSG0000000403  | Negr1      | protein_codi | 156561794 | 157316445 | inside       | 710861 | 43532  | shortestDistance |
| chr3 | 157274625 | 157275030 | 406  | 1.42  | 0.00212  | 0.0129   | ENSMUSG0000000403  | Negr1      | protein_codi | 156561794 | 157316445 | inside       | 713034 | 41415  | shortestDistance |
| chr3 | 157279535 | 157280092 | 558  | 2.05  | 1.69E-07 | 5.22E-06 | ENSMUSG0000000403  | Negr1      | protein_codi | 156561794 | 157316445 | inside       | 718020 | 36353  | shortestDistance |
| chr3 | 157281270 | 157281659 | 390  | 1.05  | 0.00529  | 0.026    | ENSMUSG0000000403  | Negr1      | protein_codi | 156561794 | 157316445 | inside       | 719670 | 34786  | shortestDistance |
| chr3 | 157359642 | 157360514 | 873  | -1.1  | 0.000356 | 0.00315  | ENSMUSG0000006451  | Gm22458    | snRNA        | 157365998 | 157366104 | upstream     | -5920  | 5484   | shortestDistance |
| chr3 | 157371518 | 157372085 | 568  | 2.32  | 6.13E-08 | 2.20E-06 | ENSMUSG0000006451  | Gm22458    | snRNA        | 157365998 | 157366104 | downstream   | 5804   | 5414   | shortestDistance |
| chr3 | 157597864 | 157598285 | 422  | -1.41 | 0.000402 | 0.00348  | ENSMUSG0000000401  | Ptger3     | protein_codi | 157566892 | 157645888 | inside       | 31182  | 30972  | shortestDistance |
| chr3 | 157635615 | 157636111 | 497  | 1.53  | 0.000521 | 0.00426  | ENSMUSG0000000401  | Ptger3     | protein_codi | 157566892 | 157645888 | inside       | 68971  | 9777   | shortestDistance |
| chr3 | 157699982 | 157700452 | 471  | 1.53  | 5.21E-05 | 0.000654 | ENSMUSG0000010663  | Gm33466    | lincRNA      | 157720404 | 157726408 | downstream   | 26191  | 19952  | shortestDistance |
| chr3 | 157842699 | 157843289 | 421  | 2.54  | 2.34E-09 | 1.34E-07 | ENSMUSG0000010641  | Gm5550     | processed_p  | 157816720 | 157817795 | upstream     | -25284 | 25074  | shortestDistance |
| chr3 | 158061904 | 158062580 | 677  | 3.59  | 1.34E-19 | 6.80E-16 | ENSMUSG0000006305  | Lrrc40     | protein_codi | 158036662 | 158068487 | inside       | 25580  | 5907   | shortestDistance |
| chr3 | 158195426 | 158195843 | 418  | -1.79 | 2.90E-07 | 8.26E-06 | ENSMUSG0000000281  | Lrrc7      | protein_codi | 158082891 | 158562221 | inside       | 366587 | 112535 | shortestDistance |
| chr3 | 158593932 | 158595875 | 554  | -2.15 | 7.29E-07 | 1.80E-05 | ENSMUSG0000000281  | Lrrc7      | protein_codi | 158082891 | 158562221 | inside       | 2623   | 2346   | shortestDistance |
| chr3 | 159494988 | 159496375 | 1388 | -0.88 | 0.00212  | 0.0129   | ENSMUSG0000000281  | Depdc1a    | protein_codi | 159495433 | 159529955 | overlapStart | 249    | 445    | shortestDistance |
| chr3 | 159548203 | 159548642 | 440  | -1.17 | 0.0042   | 0.0218   | ENSMUSG0000000281  | Depdc1a    | protein_codi | 159495433 | 159529955 | downstream   | 52989  | 18248  | shortestDistance |
| chr3 | 159850667 | 159885661 | 595  | -1.23 | 8.24E-05 | 0.000948 | ENSMUSG0000000281  | Wls        | protein_codi | 159839672 | 159938664 | inside       | 45692  | 45395  | shortestDistance |
| chr3 | 159890195 | 159891730 | 1536 | 1.04  | 0.00336  | 0.0183   | ENSMUSG0000000281  | Wls        | protein_codi | 159839672 | 159938664 | inside       | 51290  | 46934  | shortestDistance |
| chr4 | 3052117   | 3052710   | 594  | -0.86 | 0.00777  | 0.035    | ENSMUSG0000009918  | Gm27878    | miRNA        | 3051714   | 3051819   | upstream     | -595   | 298    | shortestDistance |
| chr4 | 3230934   | 3231276   | 343  | -0.93 | 0.00627  | 0.0296   | ENSMUSG00000008518 | A1838599   | lincRNA      | 3242055   | 3258092   | upstream     | -10950 | 10779  | shortestDistance |
| chr4 | 3412381   | 3412816   | 436  | -0.95 | 0.00432  | 0.0223   | ENSMUSG00000008348 | Gm11784    | unprocessed  | 3386846   | 3388691   | downstream   | 25752  | 23690  | shortestDistance |
| chr4 | 3419787   | 3420518   | 732  | -0.87 | 0.00997  | 0.0423   | ENSMUSG00000008348 | Gm11784    | unprocessed  | 3386846   | 3388691   | downstream   | 33306  | 31096  | shortestDistance |
| chr4 | 3496089   | 3496372   | 284  | -1.51 | 0.00136  | 0.00909  | ENSMUSG00000008166 | Gm11787    | unprocessed  | 3496978   | 3516515   | downstream   | 20285  | 606    | shortestDistance |
| chr4 | 3511341   | 3511934   | 594  | -0.98 | 0.00741  | 0.0338   | ENSMUSG00000008166 | Gm11787    | unprocessed  | 3496978   | 3516515   | inside       | 4877   | 4581   | shortestDistance |
| chr4 | 3608406   | 3608865   | 260  | 1.52  | 0.000832 | 0.00617  | ENSMUSG00000002823 | Tgs1       | protein_codi | 3574875   | 3616619   | inside       | 33661  | 7954   | shortestDistance |
| chr4 | 3681575   | 3681925   | 351  | 1.17  | 0.00177  | 0.0112   | ENSMUSG00000004222 | Lyn        | protein_codi | 3678115   | 3813122   | inside       | 3635   | 3460   | shortestDistance |
| chr4 | 3695370   | 3695927   | 558  | 1.27  | 0.00142  | 0.00942  | ENSMUSG00000004222 | Lyn        | protein_codi | 3678115   | 3813122   | inside       | 17533  | 17255  | shortestDistance |
| chr4 | 3699133   | 3699      |      |       |          |          |                    |            |              |           |           |              |        |        |                  |

|      |          |          |      |       |          |          |                    |             |              |          |          |              |         |        |                  |
|------|----------|----------|------|-------|----------|----------|--------------------|-------------|--------------|----------|----------|--------------|---------|--------|------------------|
| chr4 | 8689914  | 8690605  | 692  | 1.55  | 2.96E-05 | 0.00041  | ENSMUSG0000004123  | Chd7        | protein_codi | 8690406  | 8867659  | overlapStart | -146    | 199    | shortestDistance |
| chr4 | 8774766  | 8775403  | 638  | 1.4   | 0.00163  | 0.0105   | ENSMUSG0000004123  | Chd7        | protein_codi | 8690406  | 8867659  | inside       | 84678   | 84360  | shortestDistance |
| chr4 | 8788542  | 8789011  | 470  | 3.35  | 7.91E-11 | 7.60E-09 | ENSMUSG0000004123  | Chd7        | protein_codi | 8690406  | 8867659  | inside       | 98370   | 78648  | shortestDistance |
| chr4 | 8821521  | 8821833  | 313  | 3.02  | 8.01E-08 | 2.76E-06 | ENSMUSG0000004123  | Chd7        | protein_codi | 8690406  | 8867659  | inside       | 131271  | 45826  | shortestDistance |
| chr4 | 8822533  | 8822910  | 378  | 2.3   | 1.29E-06 | 2.90E-05 | ENSMUSG0000004123  | Chd7        | protein_codi | 8690406  | 8867659  | inside       | 132316  | 44749  | shortestDistance |
| chr4 | 8842324  | 8843203  | 880  | 1.33  | 0.000102 | 0.00113  | ENSMUSG0000004123  | Chd7        | protein_codi | 8690406  | 8867659  | inside       | 152358  | 24456  | shortestDistance |
| chr4 | 8853855  | 8854589  | 735  | 1.56  | 0.00271  | 0.0155   | ENSMUSG0000004123  | Chd7        | protein_codi | 8690406  | 8867659  | inside       | 163816  | 13070  | shortestDistance |
| chr4 | 9008035  | 9081405  | 571  | 2.24  | 6.41E-06 | 0.000114 | ENSMUSG000000595   | Gm23423     | snRNA        | 9210003  | 9210108  | upstream     | -128883 | 128598 | shortestDistance |
| chr4 | 9109957  | 9110750  | 794  | 2.05  | 3.64E-09 | 1.94E-07 | ENSMUSG0000007595  | Gm23423     | snRNA        | 9210003  | 9210108  | upstream     | -99649  | 99253  | shortestDistance |
| chr4 | 9115845  | 9116407  | 563  | 1.78  | 4.95E-07 | 1.30E-05 | ENSMUSG0000007595  | Gm23423     | snRNA        | 9210003  | 9210108  | upstream     | -93877  | 93596  | shortestDistance |
| chr4 | 9233550  | 9234352  | 803  | -1.65 | 1.47E-05 | 0.000228 | ENSMUSG0000007595  | Gm23423     | snRNA        | 9210003  | 9210108  | downstream   | 23948   | 23442  | shortestDistance |
| chr4 | 9681131  | 9681640  | 510  | 2.01  | 1.28E-07 | 4.08E-06 | ENSMUSG0000009272  | Gm25677     | miRNA        | 9669279  | 9669350  | downstream   | 12107   | 11781  | shortestDistance |
| chr4 | 9682292  | 9683146  | 855  | 1.03  | 0.00126  | 0.00855  | ENSMUSG0000006469  | Gm24152     | snRNA        | 9695645  | 9695807  | downstream   | 13088   | 12499  | shortestDistance |
| chr4 | 9737633  | 9738060  | 428  | 1.41  | 0.00032  | 0.00289  | ENSMUSG0000008555  | 4930412C18I | processed_tr | 9770585  | 9823411  | upstream     | -32739  | 32525  | shortestDistance |
| chr4 | 9778412  | 9778758  | 347  | 2.96  | 5.28E-07 | 1.37E-05 | ENSMUSG0000008555  | 4930412C18I | processed_tr | 9770585  | 9823411  | inside       | 8000    | 7827   | shortestDistance |
| chr4 | 10509911 | 10510469 | 559  | -1.96 | 1.59E-08 | 6.99E-07 | ENSMUSG0000008608  | 1700123012  | lincRNA      | 10479962 | 10797811 | inside       | 287621  | 29949  | shortestDistance |
| chr4 | 10703179 | 10704001 | 823  | -1.19 | 0.00559  | 0.0272   | ENSMUSG0000008608  | 1700123012  | lincRNA      | 10479962 | 10797811 | inside       | 94221   | 9810   | shortestDistance |
| chr4 | 10753216 | 10753541 | 326  | -1.5  | 0.000406 | 0.00351  | ENSMUSG0000008608  | 1700123012  | lincRNA      | 10479962 | 10797811 | inside       | 44433   | 44270  | shortestDistance |
| chr4 | 10804779 | 10805047 | 269  | -1.67 | 5.07E-05 | 0.000638 | ENSMUSG0000008608  | 1700123012  | lincRNA      | 10479962 | 10797811 | upstream     | -7102   | 6968   | shortestDistance |
| chr4 | 11006928 | 11008310 | 1383 | 1     | 0.00303  | 0.0169   | ENSMUSG0000004996  | Plekhf2     | protein_codi | 10988662 | 11007927 | overlapStart | 308     | 383    | shortestDistance |
| chr4 | 11190501 | 11191877 | 1377 | 0.95  | 0.00452  | 0.0231   | ENSMUSG0000002821  | Ccne2       | protein_codi | 11191351 | 11204779 | overlapStart | -162    | 526    | shortestDistance |
| chr4 | 11192183 | 11192436 | 254  | 1.05  | 0.00353  | 0.019    | ENSMUSG0000002821  | Ccne2       | protein_codi | 11191351 | 11204779 | inside       | 959     | 832    | shortestDistance |
| chr4 | 11323295 | 11323698 | 404  | 2.08  | 6.56E-07 | 1.64E-05 | ENSMUSG0000009701  | Gm26663     | lincRNA      | 11321944 | 11342953 | inside       | 1552    | 1351   | shortestDistance |
| chr4 | 11334797 | 11335276 | 480  | -1.15 | 0.00294  | 0.0166   | ENSMUSG0000009701  | Gm26663     | lincRNA      | 11321944 | 11342953 | inside       | 13092   | 7677   | shortestDistance |
| chr4 | 11348273 | 11348658 | 386  | 1.62  | 0.000105 | 0.00116  | ENSMUSG0000004072  | Esrp1       | protein_codi | 11331933 | 11386783 | inside       | 38317   | 16340  | shortestDistance |
| chr4 | 11914285 | 11915038 | 754  | -0.95 | 0.00861  | 0.0379   | ENSMUSG00000008451 | Gm22477     | misc_RNA     | 11928424 | 11928739 | upstream     | -13762  | 13386  | shortestDistance |
| chr4 | 11989324 | 11989680 | 357  | 1.4   | 0.000453 | 0.00382  | ENSMUSG0000008555  | 1700123012  | processed_tr | 11966565 | 11994280 | inside       | 22937   | 4600   | shortestDistance |
| chr4 | 12306156 | 12306497 | 342  | -1.59 | 4.25E-05 | 0.000552 | ENSMUSG0000008590  | Gm11846     | lincRNA      | 12271399 | 12314583 | inside       | 34927   | 8086   | shortestDistance |
| chr4 | 12532937 | 12533480 | 544  | -2.08 | 5.13E-07 | 1.33E-05 | ENSMUSG00000010421 | Gm37985     | TEC          | 12597388 | 12671843 | upstream     | -64180  | 63908  | shortestDistance |
| chr4 | 12557107 | 12557584 | 478  | -1.55 | 1.08E-05 | 0.000177 | ENSMUSG00000010421 | Gm37985     | TEC          | 12597388 | 12671843 | upstream     | -40042  | 39804  | shortestDistance |
| chr4 | 12647685 | 12648341 | 657  | -1.55 | 3.84E-05 | 0.000508 | ENSMUSG00000010421 | Gm37985     | TEC          | 12597388 | 12671843 | inside       | 50625   | 23502  | shortestDistance |
| chr4 | 12775954 | 12776226 | 273  | -1.13 | 0.00462  | 0.0234   | ENSMUSG0000006582  | R-5s182     | rRNA         | 12812706 | 12812812 | upstream     | -36616  | 36480  | shortestDistance |
| chr4 | 12778120 | 12778536 | 417  | -1.33 | 0.000486 | 0.00404  | ENSMUSG0000006582  | R-5s182     | rRNA         | 12812706 | 12812812 | upstream     | -34378  | 34170  | shortestDistance |
| chr4 | 12782310 | 12782534 | 225  | -2.23 | 9.97E-07 | 2.34E-05 | ENSMUSG0000006582  | R-5s182     | rRNA         | 12812706 | 12812812 | upstream     | -30284  | 30172  | shortestDistance |
| chr4 | 12785100 | 12786492 | 683  | -1.13 | 0.00584  | 0.0281   | ENSMUSG0000006582  | R-5s182     | rRNA         | 12812706 | 12812812 | upstream     | -26555  | 26214  | shortestDistance |
| chr4 | 12792863 | 12793403 | 541  | -1.43 | 0.00298  | 0.0167   | ENSMUSG0000006582  | R-5s182     | rRNA         | 12812706 | 12812812 | upstream     | -19573  | 19303  | shortestDistance |
| chr4 | 12826401 | 12826830 | 430  | -1.07 | 0.00656  | 0.0308   | ENSMUSG0000006582  | R-5s182     | rRNA         | 12812706 | 12812812 | downstream   | 13910   | 13589  | shortestDistance |
| chr4 | 12906626 | 12907457 | 832  | -1.19 | 0.00045  | 0.0038   | ENSMUSG0000005596  | Triqk       | protein_codi | 12906838 | 12983553 | overlapStart | 204     | 212    | shortestDistance |
| chr4 | 12960714 | 12961225 | 512  | -1.04 | 0.00798  | 0.0358   | ENSMUSG0000005596  | Triqk       | protein_codi | 12906838 | 12983553 | inside       | 54132   | 22328  | shortestDistance |
| chr4 | 13092045 | 13092299 | 255  | -2.43 | 5.74E-06 | 0.000103 | ENSMUSG0000008622  | Gm11820     | lincRNA      | 13076140 | 13096806 | inside       | 16032   | 4507   | shortestDistance |
| chr4 | 13093238 | 13093862 | 625  | -2.4  | 1.23E-07 | 3.97E-06 | ENSMUSG0000008622  | Gm11820     | lincRNA      | 13076140 | 13096806 | inside       | 17410   | 2944   | shortestDistance |
| chr4 | 13098897 | 13099221 | 325  | -1.28 | 0.000167 | 0.0017   | ENSMUSG0000008622  | Gm11820     | lincRNA      | 13076140 | 13096806 | downstream   | 22919   | 2091   | shortestDistance |
| chr4 | 13227962 | 13228454 | 493  | -1.47 | 0.0107   | 0.0445   | ENSMUSG0000008035  | Gm26250     | miRNA        | 13266985 | 13267050 | downstream   | 38842   | 38531  | shortestDistance |
| chr4 | 13243359 | 13243859 | 501  | -0.99 | 0.0117   | 0.0479   | ENSMUSG0000008035  | Gm26250     | miRNA        | 13266985 | 13267050 | downstream   | 23441   | 23126  | shortestDistance |
| chr4 | 13267522 | 13268281 | 760  | -1.48 | 8.13E-05 | 0.000938 | ENSMUSG0000008035  | Gm26250     | miRNA        | 13266985 | 13267050 | upstream     | -852    | 472    | shortestDistance |
| chr4 | 13287451 | 13287774 | 324  | -1.38 | 0.000122 | 0.00131  | ENSMUSG0000008035  | Gm26250     | miRNA        | 13266985 | 13267050 | upstream     | -20562  | 20401  | shortestDistance |
| chr4 | 13300048 | 13300809 | 762  | -2.63 | 3.49E-10 | 2.63E-08 | ENSMUSG0000008035  | Gm26250     | miRNA        | 13266985 | 13267050 | upstream     | -33378  | 32998  | shortestDistance |
| chr4 | 13319271 | 13319661 | 391  | -2.27 | 1.20E-07 | 3.88E-06 | ENSMUSG0000008035  | Gm26250     | miRNA        | 13266985 | 13267050 | upstream     | -52416  | 52221  | shortestDistance |
| chr4 | 13404512 | 13405122 | 611  | -1.58 | 0.000698 | 0.00537  | ENSMUSG0000008132  | Gm11819     | processed_p  | 13444770 | 13445141 | upstream     | -39953  | 39648  | shortestDistance |
| chr4 | 13491286 | 13491699 | 414  | -1.45 | 0.000503 | 0.00414  | ENSMUSG0000008332  | Gm11826     | processed_p  | 13482755 | 13483192 | upstream     | -8300   | 8094   | shortestDistance |
| chr4 | 13742762 | 13743975 | 1214 | -1.09 | 0.000355 | 0.00314  | ENSMUSG0000000658  | Rumx1t1     | protein_codi | 13743436 | 13893649 | overlapStart | -68     | 539    | shortestDistance |
| chr4 | 13744376 | 13744593 | 218  | -1.1  | 0.00712  | 0.0327   | ENSMUSG0000000658  | Rumx1t1     | protein_codi | 13743436 | 13893649 | inside       | 1048    | 940    | shortestDistance |
| chr4 | 13784689 | 13785524 | 836  | -1.33 | 0.00395  | 0.0208   | ENSMUSG0000000658  | Rumx1t1     | protein_codi | 13743436 | 13893649 | inside       | 41670   | 41253  | shortestDistance |
| chr4 | 13796531 | 13797221 | 691  | -1.89 | 1.40E-06 | 3.11E-05 | ENSMUSG0000000658  | Rumx1t1     | protein_codi | 13743436 | 13893649 | inside       | 53440   | 53095  | shortestDistance |
| chr4 | 13799551 | 13799807 | 257  | -1.85 | 3.90E-06 | 7.43E-05 | ENSMUSG0000000658  | Rumx1t1     | protein_codi | 13743436 | 13893649 | inside       | 56243   | 56115  | shortestDistance |
| chr4 | 13805438 | 13806500 | 1063 | -1.39 | 0.000199 | 0.00196  | ENSMUSG0000000658  | Rumx1t1     | protein_codi | 13743436 | 13893649 | inside       | 62533   | 62002  | shortestDistance |
| chr4 | 13907207 | 13907584 | 378  | -0.89 | 0.0101   | 0.0429   | ENSMUSG0000008692  | Gm11823     | lincRNA      | 13919954 | 13995193 | downstream   | 87797   | 12370  | shortestDistance |
| chr4 | 13909022 | 13909374 | 353  | -2.19 | 3.48E-06 | 6.75E-05 | ENSMUSG0000008692  | Gm11823     | lincRNA      | 13919954 | 13995193 | downstream   | 85995   | 10580  | shortestDistance |
| chr4 | 14077369 | 14078211 | 843  | -1.75 | 5.92E-07 | 1.50E-05 | ENSMUSG0000007770  | Gm24068     | snRNA        | 14079809 | 14079940 | downstream   | 2150    | 1598   | shortestDistance |
| chr4 | 14149654 | 14149922 | 269  | -1.95 | 9.89E-05 | 0.0011   | ENSMUSG0000008212  | Gm11824     | processed_p  | 14170066 | 14170911 | upstream     | -20278  | 20144  | shortestDistance |
| chr4 | 14260625 | 14260955 | 331  | -1.62 | 0.00092  | 0.00667  | ENSMUSG0000008791  | Gm24908     | snRNA        | 14239618 | 14239744 | downstream   | 21172   | 20881  | shortestDistance |
| chr4 | 14327014 | 14327556 | 543  | -1.45 | 6.26E-05 | 0.000762 | ENSMUSG0000008791  | Gm24908     | snRNA        | 14239618 | 14239744 | downstream   | 87667   | 87270  | shortestDistance |
| chr4 | 14435399 | 14435818 | 420  | -1.15 | 0.00336  | 0.0183   | ENSMUSG0000008123  | Gm11836     | processed_p  | 14433891 | 14434331 | downstream   | 1717    | 1068   | shortestDistance |
| chr4 | 14438369 | 14438814 | 446  | -2.28 | 1.29E-06 | 2.90E-05 | ENSMUSG0000008123  | Gm11836     | processed_p  | 14433891 | 14434331 | downstream   | 4701    | 4038   | shortestDistance |
| chr4 | 14525733 | 14526356 | 624  | -1.77 | 8.71E-08 | 2.96E-06 | ENSMUSG0000004056  | Slc26a7     | protein_codi | 14502430 | 14621805 | inside       | 95761   | 23303  | shortestDistance |
| chr4 | 14543749 | 14544212 | 464  | -1.03 | 0.00436  | 0.0224   | ENSMUSG0000004056  | Slc26a7     | protein_codi | 14502430 | 14621805 | inside       | 77825   | 41319  | shortestDistance |
| chr4 | 14546027 | 14546444 | 418  | -1.19 | 0.00583  | 0.028    | ENSMUSG0000004056  | Slc26a7     | protein_codi | 14502430 | 14621805 | inside       | 75569   | 43597  | shortestDistance |
| chr4 | 14621196 | 14622245 | 1050 | -1.13 | 0.000889 | 0.00649  | ENSMUSG0000004056  | Slc26a7     | protein_codi | 14502430 | 14621805 | overlapStart | 85      | 440    | shortestDistance |
| chr4 | 14814325 | 14814614 | 290  | -0.96 | 0.00761  | 0.0344   | ENSMUSG0000004055  | Otdub6      | protein_codi | 14809498 | 14826587 | inside       | 12117   | 4827   | shortestDistance |
| chr4 | 14819752 | 14820049 | 298  | -1.13 | 0.00746  | 0.0339   | ENSMUSG0000004055  | Otdub6      | protein_codi | 14809498 | 14826587 | inside       | 6687    | 6538   | shortestDistance |
| chr4 | 14845434 | 14846313 | 880  | -1.1  | 0.001    |          |                    |             |              |          |          |              |         |        |                  |



|      |          |          |      |       |          |          |                              |              |          |          |              |        |        |                  |
|------|----------|----------|------|-------|----------|----------|------------------------------|--------------|----------|----------|--------------|--------|--------|------------------|
| chr4 | 34847713 | 34848318 | 606  | -1.12 | 0.00254  | 0.0148   | ENSMUSG0000003996Zfp292      | protein_codi | 34803113 | 34882960 | inside       | 34944  | 34642  | shortestDistance |
| chr4 | 34959592 | 34959987 | 396  | 2.17  | 6.44E-05 | 0.00078  | ENSMUSG0000007391Mob3b       | protein_codi | 34949074 | 35157484 | inside       | 197694 | 10518  | shortestDistance |
| chr4 | 34986192 | 34986835 | 644  | -1.69 | 2.35E-05 | 0.00038  | ENSMUSG0000007391Mob3b       | protein_codi | 34949074 | 35157484 | inside       | 170970 | 37118  | shortestDistance |
| chr4 | 34986854 | 34987212 | 359  | -1.44 | 0.000467 | 0.00392  | ENSMUSG0000007391Mob3b       | protein_codi | 34949074 | 35157484 | inside       | 170451 | 37780  | shortestDistance |
| chr4 | 35004423 | 35004893 | 471  | -1.28 | 0.00059  | 0.00471  | ENSMUSG0000007391Mob3b       | protein_codi | 34949074 | 35157484 | inside       | 152826 | 55349  | shortestDistance |
| chr4 | 35120100 | 35120545 | 446  | 2.06  | 3.11E-06 | 6.15E-05 | ENSMUSG0000007391Mob3b       | protein_codi | 34949074 | 35157484 | inside       | 37162  | 36939  | shortestDistance |
| chr4 | 35140215 | 35141293 | 1079 | -1.03 | 0.00195  | 0.0121   | ENSMUSG0000007391Mob3b       | protein_codi | 34949074 | 35157484 | inside       | 16730  | 16191  | shortestDistance |
| chr4 | 35155637 | 35155887 | 251  | -1.29 | 0.000127 | 0.00136  | ENSMUSG0000007391Mob3b       | protein_codi | 34949074 | 35157484 | inside       | 1722   | 1597   | shortestDistance |
| chr4 | 35156084 | 35156648 | 565  | -0.95 | 0.00227  | 0.0136   | ENSMUSG0000007391Mob3b       | protein_codi | 34949074 | 35157484 | inside       | 1118   | 836    | shortestDistance |
| chr4 | 35156693 | 35157668 | 976  | -0.8  | 0.00956  | 0.041    | ENSMUSG0000007391Mob3b       | protein_codi | 34949074 | 35157484 | overlapStart | 304    | 184    | shortestDistance |
| chr4 | 35168018 | 35168657 | 640  | -1.35 | 0.000492 | 0.00408  | ENSMUSG0000007391Mob3b       | protein_codi | 34949074 | 35157484 | upstream     | -10854 | 10534  | shortestDistance |
| chr4 | 35192675 | 35193132 | 458  | -1.19 | 0.00189  | 0.0118   | ENSMUSG00000028303110043021  | protein_codi | 35191285 | 35226175 | inside       | 33271  | 1390   | shortestDistance |
| chr4 | 35241531 | 35242133 | 603  | -0.86 | 0.00529  | 0.0026   | ENSMUSG0000008482Gm12367     | processed_tr | 35225897 | 35262222 | inside       | 15935  | 15634  | shortestDistance |
| chr4 | 35258948 | 35259517 | 570  | -1.01 | 0.0089   | 0.0388   | ENSMUSG0000008482Gm12367     | processed_tr | 35225897 | 35262222 | inside       | 33335  | 2705   | shortestDistance |
| chr4 | 35308238 | 35308514 | 277  | -1.31 | 0.00096  | 0.00691  | ENSMUSG0000008482Gm12367     | processed_tr | 35225897 | 35262222 | downstream   | 82479  | 46016  | shortestDistance |
| chr4 | 35367286 | 35367869 | 584  | -1.53 | 2.34E-05 | 0.000337 | ENSMUSG0000008393Gm12368     | processed_p  | 35401058 | 35401491 | upstream     | -33480 | 33189  | shortestDistance |
| chr4 | 35372893 | 35373412 | 520  | -1.48 | 1.22E-05 | 0.000195 | ENSMUSG0000008393Gm12368     | processed_p  | 35401058 | 35401491 | upstream     | -27906 | 27646  | shortestDistance |
| chr4 | 35417894 | 35418191 | 298  | -0.98 | 0.00865  | 0.038    | ENSMUSG0000008393Gm12368     | processed_p  | 35401058 | 35401491 | downstream   | 16984  | 16403  | shortestDistance |
| chr4 | 36288842 | 36289660 | 819  | -1.09 | 0.000332 | 0.00298  | ENSMUSG0000004508Lingo2      | protein_codi | 35706647 | 36951747 | inside       | 662496 | 582195 | shortestDistance |
| chr4 | 36289749 | 36290069 | 321  | -0.88 | 0.0105   | 0.0439   | ENSMUSG0000004508Lingo2      | protein_codi | 35706647 | 36951747 | inside       | 661838 | 583102 | shortestDistance |
| chr4 | 36296595 | 36296946 | 352  | -2.24 | 5.80E-08 | 2.10E-06 | ENSMUSG0000004508Lingo2      | protein_codi | 35706647 | 36951747 | inside       | 654977 | 589948 | shortestDistance |
| chr4 | 36305202 | 36305584 | 383  | 4.47  | 5.05E-12 | 7.33E-10 | ENSMUSG0000004508Lingo2      | protein_codi | 35706647 | 36951747 | inside       | 646354 | 598555 | shortestDistance |
| chr4 | 36312984 | 36313437 | 454  | 3.12  | 6.22E-12 | 8.81E-10 | ENSMUSG0000004508Lingo2      | protein_codi | 35706647 | 36951747 | inside       | 638537 | 606337 | shortestDistance |
| chr4 | 36950201 | 36951081 | 881  | -1.49 | 1.14E-06 | 2.62E-05 | ENSMUSG0000004508Lingo2      | protein_codi | 35706647 | 36951747 | inside       | 1106   | 666    | shortestDistance |
| chr4 | 36951236 | 36951936 | 701  | -1.22 | 0.000144 | 0.0015   | ENSMUSG0000004508Lingo2      | protein_codi | 35706647 | 36951747 | overlapStart | 161    | 189    | shortestDistance |
| chr4 | 37114430 | 37114890 | 461  | -1.75 | 4.03E-05 | 0.000528 | ENSMUSG0000008096Gm12372     | processed_p  | 37139107 | 37139874 | downstream   | 25214  | 24217  | shortestDistance |
| chr4 | 37385701 | 37385982 | 282  | -1.41 | 8.84E-05 | 0.001    | ENSMUSG0000008062Gm12374     | lincRNA      | 37249403 | 37332515 | downstream   | 136439 | 53186  | shortestDistance |
| chr4 | 37386875 | 37387317 | 443  | -1.52 | 3.80E-06 | 7.26E-05 | ENSMUSG0000008062Gm12374     | lincRNA      | 37249403 | 37332515 | downstream   | 137693 | 54360  | shortestDistance |
| chr4 | 37412568 | 37413268 | 701  | -1.07 | 0.000977 | 0.007    | ENSMUSG0000008062Gm12374     | lincRNA      | 37249403 | 37332515 | downstream   | 163151 | 80053  | shortestDistance |
| chr4 | 39496881 | 39497163 | 283  | -2.05 | 0.000129 | 0.00137  | ENSMUSG00000028281700009N14  | protein_codi | 39450295 | 39451776 | downstream   | 46727  | 45105  | shortestDistance |
| chr4 | 39811363 | 39812220 | 858  | -1.93 | 3.53E-08 | 1.38E-06 | ENSMUSG0000008327Gm12384     | processed_p  | 39823430 | 39824348 | upstream     | -11638 | 11210  | shortestDistance |
| chr4 | 40014570 | 40015095 | 526  | -1.9  | 5.65E-07 | 1.44E-05 | ENSMUSG0000008852Gm26087     | snRNA        | 39981497 | 39981558 | upstream     | -33274 | 33012  | shortestDistance |
| chr4 | 40156031 | 40156470 | 440  | 4.52  | 8.32E-16 | 5.35E-13 | ENSMUSG0000008400Aco1        | protein_codi | 40143081 | 40198338 | inside       | 13169  | 12950  | shortestDistance |
| chr4 | 40182826 | 40183300 | 475  | -0.87 | 0.00606  | 0.0289   | ENSMUSG0000002840Aco1        | protein_codi | 40143081 | 40198338 | inside       | 39982  | 15038  | shortestDistance |
| chr4 | 40238637 | 40239981 | 1345 | -0.77 | 0.0111   | 0.0458   | ENSMUSG0000008205Ddx58       | protein_codi | 40203773 | 40239828 | overlapStart | 519    | 153    | shortestDistance |
| chr4 | 40285500 | 40285950 | 451  | -0.96 | 0.0117   | 0.0479   | ENSMUSG0000007101Ndufrb6     | protein_codi | 40270591 | 40279421 | upstream     | -6304  | 6079   | shortestDistance |
| chr4 | 40299131 | 40299599 | 469  | -1.01 | 0.00514  | 0.0254   | ENSMUSG00000087134930509K18l | lincRNA      | 40313232 | 40317719 | upstream     | -13867 | 13633  | shortestDistance |
| chr4 | 40334911 | 40335203 | 293  | -1.08 | 0.00637  | 0.03     | ENSMUSG00000087134930509K18l | lincRNA      | 40313232 | 40317719 | downstream   | 21825  | 17192  | shortestDistance |
| chr4 | 40364217 | 40364950 | 734  | 1.86  | 1.08E-06 | 2.51E-05 | ENSMUSG00000087134930509K18l | lincRNA      | 40313232 | 40317719 | downstream   | 51352  | 46498  | shortestDistance |
| chr4 | 40649150 | 40649474 | 325  | 2.47  | 1.87E-06 | 3.98E-05 | ENSMUSG0000008172Gm12391     | processed_p  | 40678332 | 40678778 | upstream     | -29020 | 28858  | shortestDistance |
| chr4 | 40651100 | 40651383 | 284  | 2.97  | 1.11E-06 | 2.57E-05 | ENSMUSG0000008172Gm12391     | processed_p  | 40678332 | 40678778 | upstream     | -27090 | 26949  | shortestDistance |
| chr4 | 40781120 | 40781603 | 484  | 0.87  | 0.0106   | 0.0442   | ENSMUSG0000005641Gm12396     | processed_p  | 40775259 | 40775564 | upstream     | -5798  | 5556   | shortestDistance |
| chr4 | 40781845 | 40782544 | 700  | 1.16  | 0.000738 | 0.00561  | ENSMUSG0000005641Gm12396     | processed_p  | 40775259 | 40775564 | upstream     | -6630  | 6281   | shortestDistance |
| chr4 | 40818496 | 40818801 | 306  | 1.54  | 0.000749 | 0.00567  | ENSMUSG0000002841B4galnt1    | protein_codi | 40804602 | 40854005 | inside       | 35357  | 13894  | shortestDistance |
| chr4 | 40844959 | 40845384 | 426  | 1.04  | 0.00352  | 0.019    | ENSMUSG0000002841B4galnt1    | protein_codi | 40804602 | 40854005 | inside       | 8833   | 8621   | shortestDistance |
| chr4 | 41368100 | 41368722 | 623  | 2.75  | 3.35E-07 | 9.35E-06 | ENSMUSG0000002843Ubp1        | protein_codi | 41348996 | 41390525 | inside       | 19415  | 19104  | shortestDistance |
| chr4 | 41645539 | 41645833 | 295  | -1    | 0.0115   | 0.0473   | ENSMUSG0000002843Gm12405     | antisense_RI | 41642185 | 41643077 | downstream   | 3501   | 2462   | shortestDistance |
| chr4 | 43045637 | 43046391 | 755  | 0.78  | 0.0107   | 0.0447   | ENSMUSG0000003600Fam214b     | protein_codi | 43032414 | 43046220 | overlapStart | 206    | 171    | shortestDistance |
| chr4 | 43425589 | 43426101 | 293  | 1.31  | 0.00613  | 0.0292   | ENSMUSG0000003596Rusc2       | protein_codi | 43381979 | 43427088 | inside       | 43976  | 987    | shortestDistance |
| chr4 | 43523339 | 43523857 | 519  | 0.99  | 0.0099   | 0.0421   | ENSMUSG0000002846Tpm2        | protein_codi | 43514711 | 43523765 | overlapStart | 167    | 92     | shortestDistance |
| chr4 | 43555998 | 43556297 | 300  | 1.02  | 0.00903  | 0.0393   | ENSMUSG0000002846Tln1        | protein_codi | 43531519 | 43562691 | inside       | 6543   | 6394   | shortestDistance |
| chr4 | 43693731 | 43694373 | 643  | 1.61  | 0.000118 | 0.00128  | ENSMUSG0000005021Olf7r0      | protein_codi | 43694784 | 43700807 | downstream   | 6755   | 411    | shortestDistance |
| chr4 | 43694647 | 43694994 | 348  | 1.47  | 0.0014   | 0.00928  | ENSMUSG0000005021Olf7r0      | protein_codi | 43694784 | 43700807 | overlapEnd   | 5987   | 137    | shortestDistance |
| chr4 | 43965846 | 43966221 | 376  | 2.8   | 2.91E-07 | 8.30E-06 | ENSMUSG0000002848Glipr2      | protein_codi | 43957401 | 43979118 | inside       | 8633   | 8445   | shortestDistance |
| chr4 | 45788466 | 45789397 | 932  | 1.57  | 0.00392  | 0.0206   | ENSMUSG0000003556Aldh1b1     | protein_codi | 45799022 | 45804604 | upstream     | -10090 | 9625   | shortestDistance |
| chr4 | 45889525 | 45889961 | 437  | 2.8   | 3.71E-09 | 1.97E-07 | ENSMUSG0000003553Cdc180      | protein_codi | 45890303 | 45950774 | upstream     | -560   | 342    | shortestDistance |
| chr4 | 45890064 | 45890542 | 479  | 0.85  | 0.0114   | 0.0468   | ENSMUSG0000003553Cdc180      | protein_codi | 45890303 | 45950774 | overlapStart | 0      | 239    | shortestDistance |
| chr4 | 45949056 | 45949824 | 769  | 1.65  | 1.51E-05 | 0.000234 | ENSMUSG0000003553Cdc180      | protein_codi | 45890303 | 45950774 | inside       | 59137  | 950    | shortestDistance |
| chr4 | 46590826 | 46591168 | 343  | 2.07  | 2.44E-06 | 4.99E-05 | ENSMUSG0000002833Coro2a      | protein_codi | 46536937 | 46602202 | inside       | 11205  | 11034  | shortestDistance |
| chr4 | 46592051 | 46592500 | 450  | 0.91  | 0.0122   | 0.0494   | ENSMUSG0000002833Coro2a      | protein_codi | 46536937 | 46602202 | inside       | 9926   | 9702   | shortestDistance |
| chr4 | 46613652 | 46614012 | 361  | 1.01  | 0.00568  | 0.0275   | ENSMUSG0000003981Tbc1d2      | protein_codi | 46604390 | 46650209 | inside       | 36377  | 9262   | shortestDistance |
| chr4 | 46630270 | 46630923 | 654  | 1.09  | 0.00481  | 0.0242   | ENSMUSG0000003981Tbc1d2      | protein_codi | 46604390 | 46650209 | inside       | 19613  | 19286  | shortestDistance |
| chr4 | 46635920 | 46636531 | 612  | 1.76  | 4.29E-05 | 0.000556 | ENSMUSG0000003981Tbc1d2      | protein_codi | 46604390 | 46650209 | inside       | 13983  | 13678  | shortestDistance |
| chr4 | 46748922 | 46749467 | 546  | 1.87  | 3.12E-06 | 6.17E-05 | ENSMUSG0000003980Gabbr2      | protein_codi | 46662305 | 46991873 | inside       | 242679 | 86617  | shortestDistance |
| chr4 | 47020656 | 47020884 | 229  | 1.56  | 0.00247  | 0.0145   | ENSMUSG0000006619Anks6       | protein_codi | 47015669 | 47057306 | inside       | 36536  | 4987   | shortestDistance |
| chr4 | 47262037 | 47262370 | 334  | -1.04 | 0.00925  | 0.04     | ENSMUSG0000002833Col15a1     | protein_codi | 47208161 | 47313167 | inside       | 54043  | 50797  | shortestDistance |
| chr4 | 47303238 | 47303946 | 709  | 0.86  | 0.00998  | 0.0424   | ENSMUSG0000002833Col15a1     | protein_codi | 47208161 | 47313167 | inside       | 95431  | 9221   | shortestDistance |
| chr4 | 47521940 | 47522232 | 293  | -1.44 | 0.000733 | 0.00558  | ENSMUSG000000331Sec61b       | protein_codi | 47474658 | 47483242 | downstream   | 47428  | 38698  | shortestDistance |
| chr4 | 47704603 | 47705037 | 435  | 1.06  | 0.00808  | 0.0361   | ENSMUSG0000009851Gm27668     | misc_RNA     | 47603889 | 47604008 | downstream   | 100991 | 100595 | shortestDistance |
| chr4 | 47799199 | 47799583 | 385  | -1.4  | 0.000216 | 0.0021   | ENSMUSG00000010245Gm38343    | TEC          | 47827224 | 47927365 | downstream   | 127974 | 27641  | shortestDistance |
| chr4 | 47964646 | 47964983 | 338  | -1.08 | 0.00868  | 0.0381   | ENSMUSG0000008566Gm12434     | lincRNA      | 47996456 | 47998261 | upstream     | -31642 | 31473  | shortestDistance |
| chr4 | 47971883 | 47972436 | 554  | 1.13  | 0.00402  | 0.021    | ENSMUSG0000008566Gm12434     | lincRNA      | 47996456 | 47998261 | upstream     | -24296 | 24020  | shortestDistance |
| chr4 | 48131664 | 48131889 | 226  | 1.96  | 0.00     |          |                              |              |          |          |              |        |        |                  |











|      |           |           |      |       |          |          |                   |          |              |           |            |              |        |                  |                  |
|------|-----------|-----------|------|-------|----------|----------|-------------------|----------|--------------|-----------|------------|--------------|--------|------------------|------------------|
| chr4 | 122896743 | 122897255 | 513  | 1.8   | 6.81E-07 | 1.70E-05 | ENSMUSG0000002865 | Cap1     | protein_codi | 122859047 | 122886056  | upstream     | -10943 | 10687            | shortestDistance |
| chr4 | 122991183 | 122991558 | 376  | 1.31  | 0.000789 | 0.00591  | ENSMUSG0000002865 | Myc1     | protein_codi | 122995652 | 123002485  | upstream     | -4282  | 4094             | shortestDistance |
| chr4 | 123050453 | 123051191 | 739  | -0.97 | 0.00619  | 0.0294   | ENSMUSG0000002865 | Trt1     | protein_codi | 123016597 | 123054949  | inside       | 34225  | 3758             | shortestDistance |
| chr4 | 123112100 | 123112804 | 705  | 1.29  | 0.00055  | 0.00445  | ENSMUSG0000000286 | Bmp8b    | protein_codi | 123105165 | 123132099  | inside       | 7287   | 6935             | shortestDistance |
| chr4 | 123207262 | 123207870 | 609  | 2.58  | 9.05E-08 | 3.06E-06 | ENSMUSG0000000549 | Nsc1a    | protein_codi | 123201504 | 123216275  | inside       | 6062   | 5758             | shortestDistance |
| chr4 | 123239471 | 123240296 | 826  | -1.17 | 0.00925  | 0.04     | ENSMUSG0000003274 | Heyl     | protein_codi | 123233556 | 123249875  | inside       | 6328   | 5915             | shortestDistance |
| chr4 | 123245655 | 123426361 | 707  | 159   | 1.29E-05 | 0.000205 | ENSMUSG0000000286 | Macf1    | protein_codi | 123349633 | 123684360  | inside       | 258352 | 76022            | shortestDistance |
| chr4 | 123701890 | 123702143 | 254  | 1.35  | 0.00886  | 0.0387   | ENSMUSG0000000817 | Gm12922  | processed_g  | 123709219 | 123710027  | downstream   | 8011   | 7076             | shortestDistance |
| chr4 | 123940836 | 123941557 | 722  | 1.26  | 0.00162  | 0.0104   | ENSMUSG0000000286 | Rragc    | protein_codi | 123917446 | 123936997  | downstream   | 23750  | 3839             | shortestDistance |
| chr4 | 124708570 | 124709476 | 907  | 1.11  | 0.000368 | 0.00324  | ENSMUSG0000000286 | Fhl3     | protein_codi | 124700701 | 124708611  | overlapEnd   | 8322   | 41               | shortestDistance |
| chr4 | 124710969 | 124711267 | 299  | 0.87  | 0.00852  | 0.0376   | ENSMUSG0000000326 | Fhl3     | protein_codi | 124700701 | 124708611  | downstream   | 10417  | 2358             | shortestDistance |
| chr4 | 124997511 | 124998170 | 660  | 2.75  | 1.15E-10 | 1.04E-08 | ENSMUSG0000000288 | Rspo1    | protein_codi | 124986430 | 125009099  | inside       | 11410  | 10929            | shortestDistance |
| chr4 | 125084684 | 125085794 | 1111 | 0.77  | 0.0115   | 0.0473   | ENSMUSG0000000288 | Meaf6    | protein_codi | 125085134 | 125113238  | overlapStart | 105    | 450              | shortestDistance |
| chr4 | 125116197 | 125116920 | 724  | 0.95  | 0.00312  | 0.0173   | ENSMUSG0000000426 | Zc3h12a  | protein_codi | 125118423 | 125127840  | downstream   | 11282  | 1503             | shortestDistance |
| chr4 | 125132457 | 125132725 | 269  | 1.11  | 0.00142  | 0.00941  | ENSMUSG0000000426 | Zc3h12a  | protein_codi | 125118423 | 125127840  | upstream     | -4751  | 4617             | shortestDistance |
| chr4 | 125176103 | 125177395 | 1293 | 1.09  | 0.000748 | 0.00566  | ENSMUSG0000000426 | Zc3h12a  | protein_codi | 125118423 | 125127840  | upstream     | -48909 | 48263            | shortestDistance |
| chr4 | 125515622 | 125515957 | 336  | -1.1  | 0.00356  | 0.0191   | ENSMUSG0000000019 | Grik3    | protein_codi | 125490700 | 125714173  | inside       | 25090  | 24922            | shortestDistance |
| chr4 | 125702849 | 125703271 | 423  | -1.02 | 0.00603  | 0.0288   | ENSMUSG0000000019 | Grik3    | protein_codi | 125490700 | 125714173  | inside       | 212360 | 10902            | shortestDistance |
| chr4 | 126017675 | 126018282 | 608  | 3.4   | 7.11E-13 | 1.38E-10 | ENSMUSG0000000288 | Csf3r    | protein_codi | 126024550 | 126044440  | upstream     | -6572  | 6268             | shortestDistance |
| chr4 | 126018671 | 126019332 | 662  | 3.08  | 4.11E-10 | 3.01E-08 | ENSMUSG0000000288 | Csf3r    | protein_codi | 126024550 | 126044440  | upstream     | -5548  | 5218             | shortestDistance |
| chr4 | 126030698 | 126031116 | 419  | 2.23  | 1.04E-07 | 3.44E-06 | ENSMUSG0000000288 | Csf3r    | protein_codi | 126024550 | 126044440  | inside       | 6357   | 6148             | shortestDistance |
| chr4 | 126065204 | 126065661 | 458  | 3.62  | 7.35E-14 | 2.13E-11 | ENSMUSG0000000426 | Oscp1    | protein_codi | 126058565 | 126092195  | inside       | 6867   | 6639             | shortestDistance |
| chr4 | 126103084 | 126103503 | 420  | 0.96  | 0.00253  | 0.0147   | ENSMUSG0000000426 | Stk40    | protein_codi | 126103957 | 126141029  | upstream     | -663   | 454              | shortestDistance |
| chr4 | 126103636 | 126104141 | 506  | 0.86  | 0.00702  | 0.0324   | ENSMUSG0000000426 | Stk40    | protein_codi | 126103957 | 126141029  | overlapStart | -69    | 184              | shortestDistance |
| chr4 | 126259501 | 126260301 | 801  | 0.91  | 0.0045   | 0.023    | ENSMUSG0000000288 | Trappc3  | protein_codi | 126262325 | 126275883  | upstream     | -2424  | 2024             | shortestDistance |
| chr4 | 126260811 | 126261123 | 313  | 1.14  | 0.000346 | 0.00308  | ENSMUSG0000000288 | Trappc3  | protein_codi | 126262325 | 126275883  | upstream     | -1358  | 1202             | shortestDistance |
| chr4 | 126489761 | 126490176 | 416  | 1.06  | 0.0035   | 0.0189   | ENSMUSG0000000425 | Agca4    | protein_codi | 126489541 | 126533472  | inside       | 43504  | 220              | shortestDistance |
| chr4 | 126533167 | 126533768 | 602  | 1.24  | 0.00104  | 0.00736  | ENSMUSG0000000425 | Agca4    | protein_codi | 126489541 | 126533472  | overlapStart | 4      | 296              | shortestDistance |
| chr4 | 126600433 | 126600750 | 318  | 1.26  | 0.01     | 0.0426   | ENSMUSG0000000428 | Clsnp    | protein_codi | 126556935 | 126593903  | downstream   | 43657  | 6530             | shortestDistance |
| chr4 | 126770708 | 126771161 | 454  | 1.05  | 0.00624  | 0.0296   | ENSMUSG0000000288 | Au040320 | protein_codi | 126753544 | 126870070  | inside       | 17390  | 17164            | shortestDistance |
| chr4 | 127209226 | 127021666 | 741  | 0.94  | 0.0029   | 0.0164   | ENSMUSG0000000288 | Sfpcc    | protein_codi | 127021324 | 127037013  | overlapStart | -28    | 342              | shortestDistance |
| chr4 | 127021908 | 127022531 | 624  | 0.82  | 0.0115   | 0.0473   | ENSMUSG0000000288 | Sfpcc    | protein_codi | 127021324 | 127037013  | inside       | 896    | 584              | shortestDistance |
| chr4 | 127243536 | 127244293 | 758  | 0.75  | 0.0119   | 0.0484   | ENSMUSG0000000428 | Smim12   | protein_codi | 127243784 | 127247809  | overlapStart | 130    | 248              | shortestDistance |
| chr4 | 127337740 | 127337966 | 227  | 2.79  | 9.23E-06 | 0.000154 | ENSMUSG0000000426 | Gjb3     | protein_codi | 127325235 | 127330844  | upstream     | -7009  | 6896             | shortestDistance |
| chr4 | 128002605 | 128002963 | 359  | -1.7  | 0.000818 | 0.00609  | ENSMUSG0000000288 | Csm2d    | protein_codi | 127987857 | 128567656  | inside       | 14927  | 14748            | shortestDistance |
| chr4 | 128688621 | 128688952 | 332  | 1.34  | 7.00E-04 | 0.00538  | ENSMUSG0000000287 | Phc2     | protein_codi | 128654702 | 128752881  | inside       | 34084  | 33919            | shortestDistance |
| chr4 | 128689796 | 128690127 | 332  | 1.87  | 1.02E-05 | 0.000167 | ENSMUSG0000000287 | Phc2     | protein_codi | 128654702 | 128752881  | inside       | 35260  | 35094            | shortestDistance |
| chr4 | 128745206 | 128745518 | 313  | -1.26 | 0.00246  | 0.0145   | ENSMUSG0000000287 | Phc2     | protein_codi | 128654702 | 128752881  | inside       | 90660  | 7363             | shortestDistance |
| chr4 | 128891144 | 128891579 | 436  | -1.3  | 0.000973 | 0.00698  | ENSMUSG0000000410 | Trim62   | protein_codi | 128883580 | 128911328  | inside       | 7782   | 7564             | shortestDistance |
| chr4 | 128899389 | 128899882 | 494  | -1.02 | 0.00457  | 0.0232   | ENSMUSG0000000410 | Trim62   | protein_codi | 128883580 | 128911328  | inside       | 16056  | 11446            | shortestDistance |
| chr4 | 128962283 | 128962916 | 634  | 1.05  | 0.00108  | 0.00758  | ENSMUSG0000000287 | Azin2    | protein_codi | 128930233 | 128962442  | overlapStart | -158   | 159              | shortestDistance |
| chr4 | 128980260 | 128980788 | 529  | 1.33  | 0.000142 | 0.00149  | ENSMUSG0000000287 | Ak2      | protein_codi | 128991958 | 129011529  | upstream     | -11434 | 11170            | shortestDistance |
| chr4 | 129032185 | 129033935 | 1751 | 1.16  | 0.000275 | 0.00255  | ENSMUSG0000000850 | lincRNA  | 129050097    | 129057983 | downstream | 24923        | 16162  | shortestDistance |                  |
| chr4 | 129081655 | 129082260 | 606  | 2.81  | 2.91E-10 | 2.25E-08 | ENSMUSG0000000287 | Rnf19b   | protein_codi | 129058271 | 129085886  | inside       | 23687  | 3626             | shortestDistance |
| chr4 | 129120843 | 129121386 | 544  | 0.94  | 0.0102   | 0.043    | ENSMUSG0000000287 | Hpca     | protein_codi | 129111570 | 129122036  | inside       | 922    | 650              | shortestDistance |
| chr4 | 129189416 | 129190256 | 841  | 1.2   | 0.000497 | 0.00411  | ENSMUSG0000000288 | Yars     | protein_codi | 129189760 | 129219607  | overlapStart | 76     | 344              | shortestDistance |
| chr4 | 129335827 | 129336105 | 279  | 0.95  | 0.00356  | 0.0191   | ENSMUSG0000000572 | Btbb8os  | protein_codi | 129335695 | 129354547  | inside       | 271    | 132              | shortestDistance |
| chr4 | 129495761 | 129496076 | 316  | 1.26  | 0.00124  | 0.00847  | ENSMUSG0000000863 | Gm12979  | antisense_RI | 129491969 | 129509746  | inside       | 13828  | 3792             | shortestDistance |
| chr4 | 129672050 | 129673137 | 1088 | 0.94  | 0.00241  | 0.0142   | ENSMUSG0000000373 | Kpna6    | protein_codi | 129643980 | 129672767  | overlapStart | 173    | 370              | shortestDistance |
| chr4 | 129951200 | 129951944 | 745  | 0.9   | 0.00898  | 0.0391   | ENSMUSG0000000287 | Spocd1   | protein_codi | 129929249 | 129957115  | inside       | 22323  | 5171             | shortestDistance |
| chr4 | 130087417 | 130087662 | 246  | 1.05  | 0.0103   | 0.0434   | ENSMUSG0000000406 | Col16a1  | protein_codi | 130047840 | 130099283  | inside       | 39700  | 11621            | shortestDistance |
| chr4 | 130112268 | 130113141 | 874  | 3.64  | 4.18E-15 | 2.04E-12 | ENSMUSG0000000287 | Pef1     | protein_codi | 130102558 | 130128135  | inside       | 10146  | 9710             | shortestDistance |
| chr4 | 130790200 | 130790582 | 383  | 1.08  | 0.00289  | 0.0163   | ENSMUSG0000000257 | Sdc3     | protein_codi | 130792537 | 130826319  | upstream     | -2146  | 1955             | shortestDistance |
| chr4 | 130944794 | 130945263 | 470  | 1.53  | 6.56E-05 | 0.000791 | ENSMUSG0000000405 | Matn1    | protein_codi | 130944385 | 130955475  | inside       | 643    | 409              | shortestDistance |
| chr4 | 131784106 | 131784348 | 243  | 1.43  | 0.006    | 0.0287   | ENSMUSG0000000289 | Ptprr    | protein_codi | 131768457 | 131838288  | inside       | 54061  | 15649            | shortestDistance |
| chr4 | 131836842 | 131837561 | 720  | 1.01  | 0.00376  | 0.02     | ENSMUSG0000000289 | Ptprr    | protein_codi | 131768457 | 131838288  | inside       | 1086   | 727              | shortestDistance |
| chr4 | 131854914 | 131855437 | 524  | 2.09  | 4.02E-07 | 1.09E-05 | ENSMUSG0000000289 | Meccr    | protein_codi | 131843470 | 131867786  | inside       | 11706  | 11444            | shortestDistance |
| chr4 | 131873275 | 131874520 | 1246 | 0.93  | 0.00265  | 0.0153   | ENSMUSG0000000289 | Srsf4    | protein_codi | 131873617 | 131901706  | overlapStart | 281    | 342              | shortestDistance |
| chr4 | 132211563 | 132212489 | 927  | 0.81  | 0.011    | 0.0455   | ENSMUSG0000000402 | Ythdf2   | protein_codi | 132184912 | 132212303  | overlapStart | 277    | 186              | shortestDistance |
| chr4 | 132269537 | 132270604 | 1068 | 0.84  | 0.0113   | 0.0466   | ENSMUSG0000000773 | Rnu11    | snRNA        | 132270080 | 132270213  | includeFeatu | 143    | 391              | shortestDistance |
| chr4 | 132527813 | 132528337 | 525  | 1.02  | 0.00517  | 0.0255   | ENSMUSG0000000542 | Atgf1    | protein_codi | 132530555 | 132533659  | downstream   | 5584   | 2218             | shortestDistance |
| chr4 | 132748696 | 132749121 | 426  | 2.12  | 1.01E-06 | 2.37E-05 | ENSMUSG0000000288 | 5mpdl3b  | protein_codi | 132732966 | 132757252  | inside       | 8344   | 8131             | shortestDistance |
| chr4 | 132780239 | 132780710 | 472  | 0.94  | 0.00943  | 0.0406   | ENSMUSG0000000373 | Themis2  | protein_codi | 132781843 | 132796387  | downstream   | 15913  | 1133             | shortestDistance |
| chr4 | 132804438 | 132804823 | 386  | 1.95  | 0.0038   | 0.0201   | ENSMUSG0000000816 | Gm13022  | processed_g  | 132801970 | 132802254  | upstream     | -2376  | 2184             | shortestDistance |
| chr4 | 132982931 | 132983459 | 529  | 2.04  | 1.12E-06 | 2.59E-05 | ENSMUSG0000000288 | Fgr      | protein_codi | 132974095 | 133001910  | inside       | 9100   | 8836             | shortestDistance |
| chr4 | 133117982 | 133118503 | 522  | 0.98  | 0.00915  | 0.0396   | ENSMUSG0000000286 | Wsf2     | protein_codi | 133130505 | 133199756  | upstream     | -12263 | 12002            | shortestDistance |
| chr4 | 133390229 | 133390523 | 295  | 1.27  | 0.00587  | 0.0282   | ENSMUSG0000000285 | Csra1    | protein_codi | 133369706 | 133423702  | inside       | 20670  | 20523            | shortestDistance |
| chr4 | 133553132 | 133553593 | 462  | 1.22  | 0.00245  | 0.0144   | ENSMUSG0000000378 | Nr0b2    | protein_codi | 133553376 | 133556536  | overlapStart | -14    | 217              | shortestDistance |
| chr4 | 133631026 | 133631319 | 294  | 2.03  | 1.62E-05 | 0.000248 | ENSMUSG0000000375 | zdhc18   | protein_codi | 133605299 | 133650154  | inside       | 18982  | 18835            | shortestDistance |
| chr4 | 133840336 | 133841455 | 420  | 1.44  | 0.00367  | 0.0196   | ENSMUSG0000000364 | Rps6ka1  | protein_codi | 133847290 | 133887797  | downstream   | 46551  | 5835             | shortestDistance |
| chr4 | 133842887 | 133843448 | 562  | 1.08  | 0.0042   | 0.0218   |                   |          |              |           |            |              |        |                  |                  |

|      |           |           |      |       |          |          |                   |             |              |           |           |              |        |       |                  |
|------|-----------|-----------|------|-------|----------|----------|-------------------|-------------|--------------|-----------|-----------|--------------|--------|-------|------------------|
| chr4 | 139609032 | 139609390 | 359  | 1.95  | 3.33E-05 | 0.000452 | ENSMUSG0000009443 | Gm21969     | protein_codi | 139603186 | 139662691 | inside       | 6025   | 5846  | shortestDistance |
| chr4 | 139611730 | 139611978 | 249  | 2.19  | 3.95E-06 | 7.51E-05 | ENSMUSG0000009443 | Gm21969     | protein_codi | 139603186 | 139662691 | inside       | 8668   | 8544  | shortestDistance |
| chr4 | 139689586 | 139690289 | 704  | -1.21 | 0.00694  | 0.0321   | ENSMUSG0000002873 | Tas1r2      | protein_codi | 139653538 | 139670280 | downstream   | 36400  | 19306 | shortestDistance |
| chr4 | 140566672 | 140567234 | 563  | 3.04  | 1.53E-05 | 0.000236 | ENSMUSG0000004096 | Arhgef10l   | protein_codi | 140514485 | 140666012 | inside       | 99059  | 52187 | shortestDistance |
| chr4 | 140584244 | 140584728 | 485  | 1.37  | 0.000316 | 0.00286  | ENSMUSG0000004096 | Arhgef10l   | protein_codi | 140514485 | 140666012 | inside       | 81526  | 69759 | shortestDistance |
| chr4 | 140592263 | 140592558 | 296  | 1.24  | 0.00157  | 0.0102   | ENSMUSG0000004096 | Arhgef10l   | protein_codi | 140514485 | 140666012 | inside       | 73602  | 73454 | shortestDistance |
| chr4 | 140661289 | 140661877 | 589  | 1.29  | 0.00262  | 0.0151   | ENSMUSG0000004096 | Arhgef10l   | protein_codi | 140514485 | 140666012 | inside       | 4429   | 4135  | shortestDistance |
| chr4 | 140684017 | 140684904 | 888  | 1.02  | 0.000105 | 0.00744  | ENSMUSG0000008615 | Gm13025     | lincRNA      | 140679753 | 140684617 | overlapEnd   | 4707   | 287   | shortestDistance |
| chr4 | 140701101 | 140701566 | 466  | 0.8   | 0.0113   | 0.0465   | ENSMUSG0000004094 | Rcc2        | protein_codi | 140700541 | 140723220 | inside       | 793    | 560   | shortestDistance |
| chr4 | 140788276 | 140788783 | 508  | 1.26  | 0.00141  | 0.00933  | ENSMUSG0000002532 | Pad3i       | protein_codi | 140785365 | 140810648 | inside       | 22118  | 2911  | shortestDistance |
| chr4 | 140919817 | 140920559 | 743  | 0.95  | 0.0091   | 0.0395   | ENSMUSG0000002892 | Pad2i       | protein_codi | 140906344 | 140952586 | inside       | 13844  | 13473 | shortestDistance |
| chr4 | 140975347 | 140975830 | 484  | 2.82  | 2.81E-10 | 2.20E-08 | ENSMUSG0000000986 | Sdbb        | protein_codi | 140961203 | 140979193 | inside       | 14385  | 3363  | shortestDistance |
| chr4 | 140976443 | 140976794 | 352  | 2.08  | 6.43E-06 | 0.000114 | ENSMUSG0000000986 | Sdbb        | protein_codi | 140961203 | 140979193 | inside       | 15415  | 2399  | shortestDistance |
| chr4 | 140983298 | 140983905 | 608  | 0.85  | 0.00647  | 0.0304   | ENSMUSG0000003662 | Atp13a2     | protein_codi | 140986873 | 141007330 | upstream     | -3271  | 2968  | shortestDistance |
| chr4 | 140988643 | 140989268 | 626  | 1.22  | 0.00056  | 0.00452  | ENSMUSG0000003662 | Atp13a2     | protein_codi | 140986873 | 141007330 | inside       | 2083   | 1770  | shortestDistance |
| chr4 | 141044844 | 141045101 | 258  | 1.35  | 0.00247  | 0.0145   | ENSMUSG0000004086 | Crocc       | protein_codi | 141016637 | 141060550 | inside       | 15578  | 15449 | shortestDistance |
| chr4 | 141181942 | 141182443 | 502  | 3.36  | 1.71E-10 | 1.44E-08 | ENSMUSG0000002892 | Fbxo42      | protein_codi | 141147913 | 141204062 | inside       | 34279  | 21619 | shortestDistance |
| chr4 | 141277275 | 141277340 | 966  | 1.19  | 0.00043  | 0.00366  | ENSMUSG0000004835 | Gm13056     | lincRNA      | 141278439 | 141279794 | upstream     | -5181  | 4699  | shortestDistance |
| chr4 | 141431009 | 141431361 | 353  | 1.48  | 0.000283 | 0.00261  | ENSMUSG0000007063 | Srap        | protein_codi | 141432672 | 141436105 | downstream   | 4920   | 1311  | shortestDistance |
| chr4 | 141538201 | 141539224 | 1024 | 1.31  | 7.92E-05 | 0.00092  | ENSMUSG0000004076 | Spen        | protein_codi | 141467890 | 141538597 | overlapStart | -115   | 396   | shortestDistance |
| chr4 | 141545763 | 141546283 | 521  | 1.23  | 0.00115  | 0.00795  | ENSMUSG0000000484 | B330016D10  | pseudogene   | 141546189 | 141547892 | overlapStart | -166   | 94    | shortestDistance |
| chr4 | 141558591 | 141559916 | 1326 | 0.87  | 0.00502  | 0.025    | ENSMUSG0000000484 | B330016D10  | pseudogene   | 141546189 | 141547892 | downstream   | 13065  | 10699 | shortestDistance |
| chr4 | 141573057 | 141574077 | 1021 | 2.45  | 4.40E-08 | 1.66E-06 | ENSMUSG0000000026 | Fblm1       | protein_codi | 141576062 | 141606096 | downstream   | 32529  | 1985  | shortestDistance |
| chr4 | 141655824 | 141656554 | 731  | 1.15  | 0.000768 | 0.00579  | ENSMUSG0000002891 | Plekhn2     | protein_codi | 141625734 | 141664899 | inside       | 8710   | 8345  | shortestDistance |
| chr4 | 141670292 | 141670647 | 356  | 2.11  | 1.78E-06 | 3.82E-05 | ENSMUSG0000002891 | Plekhn2     | protein_codi | 141625734 | 141664899 | upstream     | -5571  | 5393  | shortestDistance |
| chr4 | 141790322 | 141791113 | 792  | 0.83  | 0.00568  | 0.0275   | ENSMUSG0000004069 | Dnajc16     | protein_codi | 141760189 | 141790931 | overlapStart | 213    | 182   | shortestDistance |
| chr4 | 141785747 | 141857938 | 492  | 0.88  | 0.0109   | 0.0452   | ENSMUSG0000004065 | Ehfd2       | protein_codi | 141858142 | 141874920 | downstream   | 17228  | 204   | shortestDistance |
| chr4 | 141858579 | 141858951 | 373  | 2.68  | 1.11E-08 | 5.15E-07 | ENSMUSG0000004065 | Ehfd2       | protein_codi | 141858142 | 141874920 | inside       | 16155  | 437   | shortestDistance |
| chr4 | 141958218 | 141958557 | 340  | 1.34  | 0.000142 | 0.00149  | ENSMUSG0000000513 | Fhd1        | protein_codi | 141890438 | 142015082 | inside       | 56694  | 56525 | shortestDistance |
| chr4 | 141958713 | 141958989 | 277  | 1.08  | 0.00719  | 0.033    | ENSMUSG0000000513 | Fhd1        | protein_codi | 141890438 | 142015082 | inside       | 56231  | 56093 | shortestDistance |
| chr4 | 141959517 | 141959998 | 482  | 3     | 1.64E-13 | 4.11E-11 | ENSMUSG0000000513 | Fhd1        | protein_codi | 141890438 | 142015082 | inside       | 55324  | 55084 | shortestDistance |
| chr4 | 141963162 | 141963463 | 302  | 1.01  | 0.00652  | 0.0306   | ENSMUSG0000000513 | Fhd1        | protein_codi | 141890438 | 142015082 | inside       | 51770  | 51619 | shortestDistance |
| chr4 | 141976195 | 141976446 | 252  | 1.5   | 0.000194 | 0.00193  | ENSMUSG0000000513 | Fhd1        | protein_codi | 141890438 | 142015082 | inside       | 38762  | 38636 | shortestDistance |
| chr4 | 141993591 | 141994805 | 1215 | 1.77  | 6.67E-08 | 2.36E-06 | ENSMUSG0000000513 | Fhd1        | protein_codi | 141890438 | 142015082 | inside       | 20884  | 20277 | shortestDistance |
| chr4 | 142005398 | 142005691 | 294  | 1.33  | 0.00335  | 0.0183   | ENSMUSG0000000513 | Fhd1        | protein_codi | 141890438 | 142015082 | inside       | 9538   | 9391  | shortestDistance |
| chr4 | 142070923 | 142071247 | 325  | 2.58  | 6.23E-06 | 0.000111 | ENSMUSG0000004061 | Tmem51      | protein_codi | 142030992 | 142084304 | inside       | 13219  | 13057 | shortestDistance |
| chr4 | 142097669 | 142098727 | 1059 | 0.89  | 0.00487  | 0.0244   | ENSMUSG0000004060 | Kazn        | protein_codi | 142102390 | 142239401 | downstream   | 141203 | 3663  | shortestDistance |
| chr4 | 142103232 | 142103566 | 335  | 1.08  | 0.0102   | 0.043    | ENSMUSG0000004060 | Kazn        | protein_codi | 142102390 | 142239401 | inside       | 136002 | 842   | shortestDistance |
| chr4 | 142135511 | 142135919 | 409  | 3.5   | 1.86E-14 | 6.93E-12 | ENSMUSG0000004060 | Kazn        | protein_codi | 142102390 | 142239401 | inside       | 103686 | 33121 | shortestDistance |
| chr4 | 142975353 | 142976007 | 655  | -0.91 | 0.0115   | 0.0473   | ENSMUSG0000011006 | G330411D24l | processed_tr | 142598441 | 143074839 | inside       | 99159  | 98832 | shortestDistance |
| chr4 | 143035120 | 143035536 | 417  | 1.87  | 2.12E-06 | 4.43E-05 | ENSMUSG0000011006 | G330411D24l | processed_tr | 142598441 | 143074839 | inside       | 39511  | 39303 | shortestDistance |
| chr4 | 143099338 | 143100069 | 732  | 1.92  | 3.33E-09 | 1.80E-07 | ENSMUSG0000005763 | Pdm2        | protein_codi | 143107391 | 143212995 | downstream   | 113291 | 7322  | shortestDistance |
| chr4 | 143112403 | 143112862 | 460  | 2.42  | 5.69E-09 | 2.85E-07 | ENSMUSG0000005763 | Pdm2        | protein_codi | 143107391 | 143212995 | inside       | 100363 | 5012  | shortestDistance |
| chr4 | 143190605 | 143191205 | 601  | -0.91 | 0.00394  | 0.0207   | ENSMUSG0000005763 | Pdm2        | protein_codi | 143107391 | 143212995 | inside       | 22090  | 21790 | shortestDistance |
| chr4 | 143214268 | 143214751 | 484  | 1.65  | 7.89E-06 | 0.000135 | ENSMUSG0000005763 | Pdm2        | protein_codi | 143107391 | 143212995 | upstream     | -1515  | 1273  | shortestDistance |
| chr4 | 143238686 | 143239541 | 856  | 1.73  | 1.20E-05 | 0.000193 | ENSMUSG0000008257 | Gm13050     | processed_p  | 143242024 | 143243368 | downstream   | 4254   | 2483  | shortestDistance |
| chr4 | 143239645 | 143240197 | 553  | 2.18  | 2.77E-09 | 1.54E-07 | ENSMUSG0000008257 | Gm13050     | processed_p  | 143242024 | 143243368 | downstream   | 3447   | 1827  | shortestDistance |
| chr4 | 143271466 | 143272047 | 582  | 1.24  | 5.00E-04 | 0.00413  | ENSMUSG0000002858 | Pdpn        | protein_codi | 143267431 | 143299564 | inside       | 27808  | 4035  | shortestDistance |
| chr4 | 143277307 | 143277776 | 470  | 2     | 9.78E-08 | 3.26E-06 | ENSMUSG0000002858 | Pdpn        | protein_codi | 143267431 | 143299564 | inside       | 22022  | 9876  | shortestDistance |
| chr4 | 143278309 | 143278833 | 525  | 4.44  | 1.13E-23 | 5.94E-19 | ENSMUSG0000002858 | Pdpn        | protein_codi | 143267431 | 143299564 | inside       | 20993  | 10878 | shortestDistance |
| chr4 | 143288273 | 143289252 | 980  | 1.96  | 1.29E-05 | 0.000204 | ENSMUSG0000002858 | Pdpn        | protein_codi | 143267431 | 143299564 | inside       | 10802  | 10312 | shortestDistance |
| chr4 | 143380689 | 143381001 | 313  | 1.64  | 0.000137 | 0.00145  | ENSMUSG0000000817 | Ynp32b-2b   | processed_p  | 143389659 | 143390416 | upstream     | -8814  | 8658  | shortestDistance |
| chr4 | 144404462 | 144405020 | 559  | -1.12 | 0.000423 | 0.00362  | ENSMUSG0000002859 | Pramf12os   | antisense_RI | 144404868 | 144406301 | overlapStart | -127   | 152   | shortestDistance |
| chr4 | 144441685 | 144441990 | 306  | 3.16  | 5.49E-07 | 1.41E-05 | ENSMUSG0000002858 | 1700012P22l | protein_codi | 144418189 | 144438772 | upstream     | -3066  | 2913  | shortestDistance |
| chr4 | 144448567 | 144449008 | 442  | 1.88  | 1.74E-05 | 0.000263 | ENSMUSG0000000921 | Gm9944      | protein_codi | 144453009 | 144453317 | downstream   | 4529   | 4001  | shortestDistance |
| chr4 | 144882837 | 144883426 | 590  | -1.23 | 0.00165  | 0.0106   | ENSMUSG0000006602 | Dhrs3       | protein_codi | 144892827 | 144928209 | upstream     | -9695  | 9401  | shortestDistance |
| chr4 | 144903943 | 144904564 | 622  | 1.2   | 0.000962 | 0.00692  | ENSMUSG0000006602 | Dhrs3       | protein_codi | 144892827 | 144928209 | inside       | 11427  | 11116 | shortestDistance |
| chr4 | 144903059 | 144930716 | 358  | -1.2  | 0.00144  | 0.00951  | ENSMUSG0000006602 | Dhrs3       | protein_codi | 144892827 | 144928209 | downstream   | 37711  | 2150  | shortestDistance |
| chr4 | 144950849 | 144951206 | 358  | 1.23  | 0.000402 | 0.00348  | ENSMUSG0000010391 | Gm38074     | TEC          | 144957155 | 144958848 | downstream   | 7820   | 5949  | shortestDistance |
| chr4 | 144955865 | 144956216 | 352  | 2.48  | 5.93E-09 | 2.96E-07 | ENSMUSG0000010391 | Gm38074     | TEC          | 144957155 | 144958848 | downstream   | 2808   | 939   | shortestDistance |
| chr4 | 144960326 | 144960960 | 635  | 2.21  | 1.06E-07 | 3.48E-06 | ENSMUSG0000010391 | Gm38074     | TEC          | 144957155 | 144958848 | upstream     | -1795  | 1478  | shortestDistance |
| chr4 | 144980065 | 144980411 | 347  | 1.39  | 0.000553 | 0.00447  | ENSMUSG0000002022 | Vps13d      | protein_codi | 144972622 | 145195005 | inside       | 214767 | 7443  | shortestDistance |
| chr4 | 144980691 | 144981505 | 815  | 0.85  | 0.0122   | 0.0492   | ENSMUSG0000002022 | Vps13d      | protein_codi | 144972622 | 145195005 | inside       | 213907 | 8069  | shortestDistance |
| chr4 | 144986498 | 144986749 | 252  | 1.2   | 0.00347  | 0.0188   | ENSMUSG0000002022 | Vps13d      | protein_codi | 144972622 | 145195005 | inside       | 208381 | 13876 | shortestDistance |
| chr4 | 144988443 | 144988744 | 302  | 2.68  | 2.47E-09 | 1.40E-07 | ENSMUSG0000002022 | Vps13d      | protein_codi | 144972622 | 145195005 | inside       | 206411 | 15821 | shortestDistance |
| chr4 | 145036971 | 145037392 | 422  | 2.09  | 2.21E-08 | 9.23E-07 | ENSMUSG0000002022 | Vps13d      | protein_codi | 144972622 | 145195005 | inside       | 157823 | 64349 | shortestDistance |
| chr4 | 145143533 | 145143932 | 390  | -1.62 | 0.000116 | 0.00126  | ENSMUSG0000002022 | Vps13d      | protein_codi | 144972622 | 145195005 | inside       | 51277  | 51083 | shortestDistance |
| chr4 | 145201485 | 145201837 | 353  | 2.13  | 4.19E-06 | 7.90E-05 | ENSMUSG0000002022 | Vps13d      | protein_codi | 144972622 | 145195005 | upstream     | -6656  | 6480  | shortestDistance |
| chr4 | 145228915 | 145229602 | 688  | -0.81 | 0.00902  | 0.0392   | ENSMUSG0000002859 | Tnfrsf1b    | protein_codi | 145213463 | 145246870 | inside       | 17612  | 15452 | shortestDistance |
| chr4 | 145229692 | 14        |      |       |          |          |                   |             |              |           |           |              |        |       |                  |

|      |           |           |      |       |          |          |                    |            |               |           |           |              |        |        |                  |
|------|-----------|-----------|------|-------|----------|----------|--------------------|------------|---------------|-----------|-----------|--------------|--------|--------|------------------|
| chr4 | 150239894 | 150240418 | 525  | 1.1   | 0.00162  | 0.0104   | ENSMUSG00000006352 | Eno1       | protein_codi  | 150236721 | 150248879 | inside       | 3435   | 3173   | shortestDistance |
| chr4 | 150461455 | 150461724 | 270  | 1.28  | 0.00894  | 0.0389   | ENSMUSG0000003985  | Rere       | protein_codi  | 150281646 | 150621966 | inside       | 179944 | 160242 | shortestDistance |
| chr4 | 150472588 | 150473406 | 819  | 0.82  | 0.00775  | 0.0349   | ENSMUSG0000003985  | Rere       | protein_codi  | 150281646 | 150621966 | inside       | 191351 | 148560 | shortestDistance |
| chr4 | 150556302 | 150557435 | 1134 | 1.09  | 0.00111  | 0.00772  | ENSMUSG0000003985  | Rere       | protein_codi  | 150281646 | 150621966 | inside       | 275222 | 64531  | shortestDistance |
| chr4 | 150583419 | 150583855 | 437  | 1.12  | 0.00311  | 0.0173   | ENSMUSG0000003985  | Rere       | protein_codi  | 150281646 | 150621966 | inside       | 301991 | 38111  | shortestDistance |
| chr4 | 150594268 | 150594792 | 525  | 0.97  | 0.00978  | 0.0417   | ENSMUSG0000003985  | Rere       | protein_codi  | 150281646 | 150621966 | inside       | 312884 | 27174  | shortestDistance |
| chr4 | 150799472 | 150799894 | 423  | 2.28  | 5.95E-08 | 2.15E-06 | ENSMUSG0000008059  | Gm13049    | lincRNA       | 150825733 | 150839575 | upstream     | -26050 | 25839  | shortestDistance |
| chr4 | 150837379 | 150837854 | 476  | 1.05  | 0.00556  | 0.0271   | ENSMUSG0000008059  | Gm13049    | lincRNA       | 150825733 | 150839575 | inside       | 11883  | 1721   | shortestDistance |
| chr4 | 150924248 | 150924742 | 495  | 1.54  | 0.000172 | 0.00175  | ENSMUSG0000002896  | Tnfrsf9    | protein_codi  | 150914562 | 150946102 | inside       | 9933   | 9686   | shortestDistance |
| chr4 | 151165567 | 151165939 | 373  | -1.53 | 0.000161 | 0.00165  | ENSMUSG0000001459  | Camta1     | protein_codi  | 150917322 | 151861876 | inside       | 696123 | 248245 | shortestDistance |
| chr4 | 151842596 | 151842989 | 394  | 1.96  | 5.53E-06 | 1.00E-04 | ENSMUSG0000001459  | Camta1     | protein_codi  | 150917322 | 151861876 | inside       | 19084  | 18887  | shortestDistance |
| chr4 | 151880158 | 151880584 | 427  | 1.48  | 0.00139  | 0.00925  | ENSMUSG0000001459  | Camta1     | protein_codi  | 150917322 | 151861876 | upstream     | -18495 | 18282  | shortestDistance |
| chr4 | 151902496 | 151903116 | 621  | -1.32 | 0.000968 | 0.00695  | ENSMUSG0000010414  | Gm37141    | TEC           | 151915993 | 151916414 | downstream   | 13608  | 12877  | shortestDistance |
| chr4 | 151933313 | 151934554 | 1242 | 0.81  | 0.00882  | 0.0386   | ENSMUSG0000003976  | Dnajc11    | protein_codi  | 151933691 | 151982137 | overlapStart | 243    | 378    | shortestDistance |
| chr4 | 152184406 | 152184637 | 232  | -1.07 | 0.00339  | 0.0184   | ENSMUSG0000002893  | Acot7      | protein_codi  | 152178134 | 152271855 | inside       | 6388   | 6272   | shortestDistance |
| chr4 | 152221358 | 152221703 | 346  | 4.36  | 1.28E-11 | 1.63E-09 | ENSMUSG0000002893  | Acot7      | protein_codi  | 152178134 | 152271855 | inside       | 43396  | 43224  | shortestDistance |
| chr4 | 152224132 | 152224555 | 424  | 3     | 2.12E-09 | 1.23E-07 | ENSMUSG0000002893  | Acot7      | protein_codi  | 152178134 | 152271855 | inside       | 46210  | 45998  | shortestDistance |
| chr4 | 152345181 | 152345764 | 584  | 1.81  | 1.26E-06 | 2.85E-05 | ENSMUSG0000000504  | Chd5       | protein_codi  | 152338651 | 152390194 | inside       | 6821   | 6530   | shortestDistance |
| chr4 | 152424444 | 152424712 | 269  | 1.36  | 0.00804  | 0.036    | ENSMUSG0000002893  | Kcnab2     | protein_codi  | 152390742 | 152477871 | inside       | 53293  | 33702  | shortestDistance |
| chr4 | 152424999 | 152425247 | 249  | 1.19  | 0.0122   | 0.0493   | ENSMUSG0000002893  | Kcnab2     | protein_codi  | 152390742 | 152477871 | inside       | 52748  | 34257  | shortestDistance |
| chr4 | 152799472 | 152799857 | 386  | 2.36  | 2.90E-06 | 5.78E-05 | ENSMUSG0000007369  | Gm833      | lincRNA       | 152697540 | 152700515 | downstream   | 102124 | 98957  | shortestDistance |
| chr4 | 154399696 | 154399983 | 288  | -1.21 | 0.00286  | 0.0162   | ENSMUSG00000003941 | Pdm16      | protein_codi  | 154316125 | 154636873 | inside       | 237033 | 83571  | shortestDistance |
| chr4 | 154496963 | 154497619 | 657  | -1.11 | 0.000488 | 0.00405  | ENSMUSG00000003941 | Pdm16      | protein_codi  | 154316125 | 154636873 | inside       | 139582 | 139254 | shortestDistance |
| chr4 | 154530304 | 154530672 | 369  | 1.58  | 3.46E-05 | 0.000466 | ENSMUSG00000003941 | Pdm16      | protein_codi  | 154316125 | 154636873 | inside       | 106385 | 106201 | shortestDistance |
| chr4 | 154773565 | 154774248 | 684  | -0.94 | 0.0111   | 0.0458   | ENSMUSG00000002963 | Ttc34      | protein_codi  | 154837459 | 154867127 | upstream     | -63553 | 63211  | shortestDistance |
| chr4 | 154911105 | 154911665 | 561  | 3.53  | 1.62E-16 | 1.51E-13 | ENSMUSG00000004233 | Tnfrsf14   | protein_codi  | 154921933 | 154928563 | downstream   | 17178  | 10268  | shortestDistance |
| chr4 | 154929091 | 154929788 | 698  | 1.96  | 3.60E-07 | 9.92E-06 | ENSMUSG00000004233 | Tnfrsf14   | protein_codi  | 154921933 | 154928563 | upstream     | -877   | 528    | shortestDistance |
| chr4 | 154934998 | 154935349 | 352  | 3.13  | 1.73E-08 | 7.49E-07 | ENSMUSG00000004233 | Tnfrsf14   | protein_codi  | 154921933 | 154928563 | upstream     | -6611  | 6435   | shortestDistance |
| chr4 | 154994048 | 154999788 | 381  | 1.48  | 0.00317  | 0.0175   | ENSMUSG0000002905  | Pclh2      | protein_codi  | 154983115 | 155056784 | inside       | 57186  | 16293  | shortestDistance |
| chr4 | 155066021 | 155067264 | 1244 | 0.93  | 0.0025   | 0.0146   | ENSMUSG0000002904  | Pex10      | protein_codi  | 155067016 | 155072433 | overlapStart | -374   | 248    | shortestDistance |
| chr4 | 155217216 | 155217785 | 570  | 1.87  | 2.09E-07 | 6.26E-06 | ENSMUSG0000002905  | Ski        | protein_codi  | 155154075 | 155222592 | inside       | 5092   | 4807   | shortestDistance |
| chr4 | 155223013 | 155223799 | 787  | 0.98  | 0.00186  | 0.0116   | ENSMUSG0000002905  | Ski        | protein_codi  | 155154075 | 155222592 | upstream     | -814   | 421    | shortestDistance |
| chr4 | 155368761 | 155369074 | 314  | 1.52  | 0.00108  | 0.00755  | ENSMUSG0000002905  | Prkcz      | protein_codi  | 155260129 | 155361361 | upstream     | -7557  | 7400   | shortestDistance |
| chr4 | 155397564 | 155398211 | 648  | 0.97  | 0.00983  | 0.0419   | ENSMUSG0000002905  | Gabrd      | protein_codi  | 155384980 | 155398112 | overlapStart | 224    | 99     | shortestDistance |
| chr4 | 155424040 | 155424333 | 294  | -1.6  | 0.000713 | 0.00176  | ENSMUSG0000007849  | Cfap74     | protein_codi  | 155409190 | 155466823 | inside       | 14996  | 14850  | shortestDistance |
| chr4 | 155561849 | 155562513 | 665  | 2.32  | 5.89E-10 | 4.09E-08 | ENSMUSG0000002906  | Nadk       | protein_codi  | 155562378 | 155591001 | overlapStart | -197   | 135    | shortestDistance |
| chr4 | 155563236 | 155564267 | 1032 | 1.23  | 0.000257 | 0.00242  | ENSMUSG0000002906  | Nadk       | protein_codi  | 155562378 | 155591001 | inside       | 1374   | 858    | shortestDistance |
| chr4 | 155582120 | 155582661 | 542  | 1.07  | 0.00771  | 0.0348   | ENSMUSG0000002906  | Nadk       | protein_codi  | 155562378 | 155591001 | inside       | 20012  | 8340   | shortestDistance |
| chr4 | 155760590 | 155761403 | 814  | 1.13  | 0.000518 | 0.00424  | ENSMUSG0000002903  | Atad3a     | protein_codi  | 155740641 | 155761093 | overlapStart | 97     | 310    | shortestDistance |
| chr4 | 155803220 | 155804056 | 837  | 0.81  | 0.00972  | 0.0415   | ENSMUSG0000002906  | Mrp120     | protein_codi  | 155802878 | 155809975 | inside       | 760    | 342    | shortestDistance |
| chr4 | 155859357 | 155859709 | 353  | 1.24  | 0.000972 | 0.00697  | ENSMUSG0000002907  | Tas1r3     | protein_codi  | 155859268 | 155863362 | inside       | 3829   | 89     | shortestDistance |
| chr4 | 155891577 | 155892398 | 822  | 0.9   | 0.00795  | 0.0356   | ENSMUSG0000002903  | Acap3      | protein_codi  | 155891822 | 155907251 | overlapStart | 166    | 245    | shortestDistance |
| chr4 | 155943193 | 155944190 | 998  | 0.96  | 0.00159  | 0.0103   | ENSMUSG0000002928  | Ube2j2     | protein_codi  | 155943831 | 155959604 | overlapStart | -139   | 359    | shortestDistance |
| chr4 | 155944337 | 155944673 | 337  | 1.61  | 9.89E-05 | 0.0011   | ENSMUSG0000000328  | Ube2j2     | protein_codi  | 155943831 | 155959604 | inside       | 674    | 506    | shortestDistance |
| chr4 | 155991568 | 155991810 | 243  | 2.37  | 9.30E-09 | 4.40E-07 | ENSMUSG0000000579  | B3gal6     | protein_codi  | 155989466 | 155992649 | inside       | 960    | 839    | shortestDistance |
| chr4 | 156050444 | 156050996 | 553  | -1.09 | 0.00231  | 0.0138   | ENSMUSG0000000297  | Tll10      | protein_codi  | 156034840 | 156059414 | inside       | 8694   | 8418   | shortestDistance |
| chr4 | 156087382 | 156087994 | 613  | 0.95  | 0.00707  | 0.0325   | ENSMUSG0000005993  | 9430015G10 | protein_codi  | 156109982 | 156127265 | upstream     | -22294 | 21988  | shortestDistance |
| chr4 | 156109025 | 156109397 | 373  | 0.88  | 0.00971  | 0.0415   | ENSMUSG0000005993  | 9430015G10 | protein_codi  | 156109982 | 156127265 | upstream     | -771   | 585    | shortestDistance |
| chr4 | 156188493 | 156188935 | 443  | 3.13  | 2.88E-09 | 1.59E-07 | ENSMUSG00000004193 | Agrn       | protein_codi  | 156165290 | 156197488 | inside       | 8774   | 8553   | shortestDistance |
| chr4 | 156235342 | 156236548 | 1207 | 0.9   | 0.00075  | 0.0341   | ENSMUSG0000009556  | Noc2l      | protein_codi  | 156236010 | 156247616 | overlapStart | -65    | 538    | shortestDistance |
| chr5 | 3216235   | 3216588   | 354  | -1.6  | 0.000289 | 0.00266  | ENSMUSG0000010580  | Gm18985    | unprocessed_p | 3212335   | 3213694   | downstream   | 4077   | 2541   | shortestDistance |
| chr5 | 3247034   | 3247707   | 674  | -0.97 | 0.00815  | 0.0364   | ENSMUSG0000006235  | Gm15772    | processed_p   | 3236431   | 3236868   | downstream   | 10939  | 10166  | shortestDistance |
| chr5 | 3419985   | 3420803   | 819  | 1.38  | 0.000302 | 0.00275  | ENSMUSG00000004027 | Cdk6       | protein_codi  | 3341485   | 3531008   | inside       | 78909  | 78500  | shortestDistance |
| chr5 | 3439383   | 3439777   | 395  | 3.43  | 4.22E-11 | 4.45E-09 | ENSMUSG00000004027 | Cdk6       | protein_codi  | 3341485   | 3531008   | inside       | 98095  | 91231  | shortestDistance |
| chr5 | 3472637   | 3473135   | 499  | 1.31  | 0.000902 | 0.00657  | ENSMUSG0000010658  | Gm17590    | antisense_RI  | 3472861   | 3480873   | overlapEnd   | 7987   | 224    | shortestDistance |
| chr5 | 3490403   | 3490745   | 343  | 1.41  | 0.0013   | 0.00878  | ENSMUSG00000004027 | Cdk6       | protein_codi  | 3341485   | 3531008   | inside       | 149089 | 40263  | shortestDistance |
| chr5 | 3491148   | 3491610   | 463  | 2.06  | 2.32E-07 | 6.84E-06 | ENSMUSG00000004027 | Cdk6       | protein_codi  | 3341485   | 3531008   | inside       | 149894 | 39398  | shortestDistance |
| chr5 | 3491867   | 3492204   | 338  | 1.9   | 2.83E-06 | 5.66E-05 | ENSMUSG00000004027 | Cdk6       | protein_codi  | 3341485   | 3531008   | inside       | 150551 | 38804  | shortestDistance |
| chr5 | 3497186   | 3498102   | 917  | 1.52  | 2.49E-05 | 0.000354 | ENSMUSG00000004027 | Cdk6       | protein_codi  | 3341485   | 3531008   | inside       | 156159 | 32906  | shortestDistance |
| chr5 | 3501647   | 3502040   | 394  | 1.16  | 0.00125  | 0.00854  | ENSMUSG00000004027 | Cdk6       | protein_codi  | 3341485   | 3531008   | inside       | 160359 | 28968  | shortestDistance |
| chr5 | 3688284   | 3688852   | 569  | -1.87 | 0.000175 | 0.00177  | ENSMUSG00000004035 | Ankib1     | protein_codi  | 3690000   | 3802925   | downstream   | 114357 | 1148   | shortestDistance |
| chr5 | 3771961   | 3772407   | 447  | -1.08 | 0.00684  | 0.0318   | ENSMUSG00000004035 | Ankib1     | protein_codi  | 3690000   | 3802925   | inside       | 30741  | 30518  | shortestDistance |
| chr5 | 4263900   | 4264113   | 214  | -1.53 | 0.000464 | 0.00389  | ENSMUSG00000005317 | Mterf1b    | protein_codi  | 4192367   | 4197651   | downstream   | 71639  | 66249  | shortestDistance |
| chr5 | 4344414   | 4344857   | 444  | 2.39  | 4.76E-10 | 3.41E-08 | ENSMUSG00000005317 | Mterf1b    | protein_codi  | 4192367   | 4197651   | downstream   | 152269 | 146763 | shortestDistance |
| chr5 | 4356963   | 4357218   | 256  | -1.8  | 6.55E-05 | 0.000791 | ENSMUSG00000005317 | Mterf1b    | protein_codi  | 4192367   | 4197651   | downstream   | 164723 | 159312 | shortestDistance |
| chr5 | 4486021   | 4486557   | 537  | -1.61 | 4.44E-05 | 0.000573 | ENSMUSG00000004467 | Fzd1       | protein_codi  | 4753839   | 4758035   | downstream   | 271746 | 267282 | shortestDistance |
| chr5 | 4496115   | 4496934   | 820  | -1.25 | 0.000387 | 0.00337  | ENSMUSG00000004467 | Fzd1       | protein_codi  | 4753839   | 4758035   | downstream   | 261511 | 256905 | shortestDistance |
| chr5 | 4528388   | 4528844   | 457  | 2.65  | 3.67E-10 | 2.74E-08 | ENSMUSG00000004467 | Fzd1       | protein_codi  | 4753839   | 4758035   | downstream   | 229419 | 224995 | shortestDistance |
| chr5 | 4530060   | 4531179   | 1120 | 2.05  | 9.47E-09 | 4.46E-07 | ENSMUSG00000004467 | Fzd1       | protein_codi  | 4753839   | 4758035   | downstream   | 227415 | 222660 | shortestDistance |
| chr5 | 4741440   | 4741748   | 309  | -1.97 | 2.20E-05 | 0.00032  | ENSMUSG00000004467 | Fzd1       | protein_codi  | 4753839   | 4758035   | downstream   | 16441  | 12091  | shortestDistance |
| chr5 | 4756      |           |      |       |          |          |                    |            |               |           |           |              |        |        |                  |

|      |           |          |      |       |          |          |                               |              |          |          |              |         |        |                  |
|------|-----------|----------|------|-------|----------|----------|-------------------------------|--------------|----------|----------|--------------|---------|--------|------------------|
| chr5 | 8455473   | 8455945  | 473  | -1.58 | 1.38E-05 | 0.000217 | ENSMUSG00000005409Slc25a40    | protein_codi | 8422850  | 8454797  | downstream   | 32859   | 676    | shortestDistance |
| chr5 | 8491851   | 8492103  | 253  | -1.26 | 0.0024   | 0.0142   | ENSMUSG00000004057Rundc3b     | protein_codi | 8490334  | 8622952  | inside       | 130975  | 1517   | shortestDistance |
| chr5 | 8571397   | 8571755  | 359  | -1.66 | 0.000254 | 0.0024   | ENSMUSG00000004057Rundc3b     | protein_codi | 8490334  | 8622952  | inside       | 51376   | 51197  | shortestDistance |
| chr5 | 8675332   | 8676231  | 900  | -1    | 0.000738 | 0.00561  | ENSMUSG00000004058Abcb1a      | protein_codi | 8660077  | 8748575  | inside       | 15705   | 15255  | shortestDistance |
| chr5 | 8727796   | 8728138  | 343  | -1.3  | 0.00714  | 0.0328   | ENSMUSG00000004058Abcb1a      | protein_codi | 8660077  | 8748575  | inside       | 67890   | 20437  | shortestDistance |
| chr5 | 8737061   | 8737446  | 386  | -1.16 | 0.004    | 0.021    | ENSMUSG00000004058Abcb1a      | protein_codi | 8660077  | 8748575  | inside       | 77177   | 11129  | shortestDistance |
| chr5 | 8775170   | 8775577  | 388  | 2.71  | 9.27E-10 | 6.13E-08 | ENSMUSG00000009727Gm5106      | antisense_RI | 8773577  | 8798523  | inside       | 23159   | 1593   | shortestDistance |
| chr5 | 8807092   | 8808076  | 985  | -0.84 | 0.0065   | 0.0305   | ENSMUSG00000002897Abcb1b      | protein_codi | 8798147  | 8866315  | inside       | 9437    | 8945   | shortestDistance |
| chr5 | 8868097   | 8868394  | 298  | -1.05 | 0.005    | 0.0249   | ENSMUSG00000002897Abcb1b      | protein_codi | 8798147  | 8866315  | downstream   | 70099   | 1782   | shortestDistance |
| chr5 | 8893344   | 8894273  | 930  | -1.26 | 8.37E-05 | 0.000961 | ENSMUSG00000004247Abcb4       | protein_codi | 8893717  | 8959231  | overlapStart | 91      | 373    | shortestDistance |
| chr5 | 8911424   | 8911994  | 571  | -1.11 | 0.000676 | 0.00524  | ENSMUSG00000004247Abcb4       | protein_codi | 8893717  | 8959231  | inside       | 17992   | 17707  | shortestDistance |
| chr5 | 8916918   | 8917552  | 635  | -0.88 | 0.00689  | 0.0319   | ENSMUSG00000004247Abcb4       | protein_codi | 8893717  | 8959231  | inside       | 23518   | 23201  | shortestDistance |
| chr5 | 8937847   | 8938565  | 719  | -1.03 | 0.00184  | 0.0115   | ENSMUSG00000004247Abcb4       | protein_codi | 8893717  | 8959231  | inside       | 44489   | 20666  | shortestDistance |
| chr5 | 8943772   | 8944440  | 669  | -0.8  | 0.00713  | 0.0327   | ENSMUSG00000004247Abcb4       | protein_codi | 8893717  | 8959231  | inside       | 50389   | 14791  | shortestDistance |
| chr5 | 8964461   | 8964937  | 477  | -1.06 | 0.00176  | 0.0112   | ENSMUSG0000000362Crot         | protein_codi | 8966033  | 8997324  | downstream   | 32625   | 1096   | shortestDistance |
| chr5 | 9059351   | 9059655  | 305  | -1.09 | 0.00234  | 0.0139   | ENSMUSG00000011443AC107763.1  | lincRNA      | 9034780  | 9061316  | inside       | 24723   | 1661   | shortestDistance |
| chr5 | 9060236   | 9060546  | 311  | -1.38 | 0.000316 | 0.00286  | ENSMUSG00000011443AC107763.1  | lincRNA      | 9034780  | 9061316  | inside       | 25611   | 770    | shortestDistance |
| chr5 | 9073298   | 9073645  | 348  | -1.2  | 0.000737 | 0.0056   | ENSMUSG00000011443AC107763.1  | lincRNA      | 9034780  | 9061316  | downstream   | 38692   | 11982  | shortestDistance |
| chr5 | 9169634   | 9169963  | 330  | -0.98 | 0.00731  | 0.0334   | ENSMUSG00000008956Gm24666     | snRNA        | 9169063  | 9169229  | downstream   | 735     | 405    | shortestDistance |
| chr5 | 9186444   | 9186873  | 430  | -1.11 | 0.00445  | 0.0228   | ENSMUSG00000008956Gm24666     | snRNA        | 9169063  | 9169229  | downstream   | 17595   | 17215  | shortestDistance |
| chr5 | 9227388   | 9228197  | 810  | -1.75 | 1.66E-06 | 3.59E-05 | ENSMUSG00000008087Gm7332      | processed_p  | 9260935  | 9261388  | downstream   | 33596   | 32738  | shortestDistance |
| chr5 | 9265420   | 9266866  | 1447 | -0.9  | 0.00304  | 0.017    | ENSMUSG0000000560C9330182L06f | protein_codi | 9266118  | 9481825  | overlapStart | 25      | 698    | shortestDistance |
| chr5 | 9347408   | 9347866  | 459  | -1.37 | 0.000428 | 0.00365  | ENSMUSG0000000560C9330182L06f | protein_codi | 9266118  | 9481825  | inside       | 81519   | 81290  | shortestDistance |
| chr5 | 9377324   | 9377663  | 340  | -1.6  | 0.01     | 0.0425   | ENSMUSG0000000560C9330182L06f | protein_codi | 9266118  | 9481825  | inside       | 111376  | 10462  | shortestDistance |
| chr5 | 9498268   | 9498540  | 273  | -1.11 | 0.0088   | 0.0385   | ENSMUSG00000000397Gm3         | protein_codi | 9485541  | 9725170  | inside       | 226766  | 12727  | shortestDistance |
| chr5 | 9725052   | 9725464  | 413  | -1.92 | 2.82E-06 | 5.65E-05 | ENSMUSG00000000397Gm3         | protein_codi | 9485541  | 9725170  | overlapStart | -88     | 118    | shortestDistance |
| chr5 | 9725667   | 9726458  | 792  | -1.6  | 3.58E-05 | 0.00048  | ENSMUSG00000000397Gm3         | protein_codi | 9485541  | 9725170  | upstream     | -892    | 497    | shortestDistance |
| chr5 | 10505170  | 10505418 | 249  | -2.27 | 6.05E-06 | 0.000108 | ENSMUSG00000009181Gm17091     | unprocessed  | 10537285 | 10539532 | upstream     | -31991  | 31867  | shortestDistance |
| chr5 | 11940298  | 11940634 | 337  | -2.37 | 1.21E-07 | 3.91E-06 | ENSMUSG00000010517Gm5288      | processed_p  | 11927622 | 11928740 | downstream   | 12844   | 11558  | shortestDistance |
| chr5 | 12040381  | 12040635 | 255  | -1.53 | 0.000994 | 0.0071   | ENSMUSG00000009951Gm29066     | lincRNA      | 12089537 | 12097647 | upstream     | -49029  | 48902  | shortestDistance |
| chr5 | 12382024  | 12382592 | 569  | -1.36 | 6.29E-05 | 0.000765 | ENSMUSG00000004253Sema3d      | protein_codi | 12383385 | 12588948 | upstream     | -1077   | 793    | shortestDistance |
| chr5 | 12555471  | 12555728 | 258  | -1.74 | 6.33E-05 | 0.00077  | ENSMUSG00000010463Gm42909     | TEC          | 12554632 | 12558250 | inside       | 968     | 839    | shortestDistance |
| chr5 | 12562235  | 12562565 | 331  | -1.06 | 0.00251  | 0.0147   | ENSMUSG00000004253Sema3d      | protein_codi | 12383385 | 12588948 | inside       | 179015  | 26383  | shortestDistance |
| chr5 | 12564701  | 12565151 | 451  | -2.09 | 5.65E-06 | 0.000102 | ENSMUSG00000004025Sema3d      | protein_codi | 12383385 | 12588948 | inside       | 181541  | 23797  | shortestDistance |
| chr5 | 12575996  | 12576243 | 248  | -2.22 | 2.18E-07 | 6.45E-06 | ENSMUSG00000004025Sema3d      | protein_codi | 12383385 | 12588948 | inside       | 192735  | 12705  | shortestDistance |
| chr5 | 12582577  | 12582917 | 341  | -1.11 | 0.00396  | 0.0208   | ENSMUSG00000004025Sema3d      | protein_codi | 12383385 | 12588948 | inside       | 199362  | 6031   | shortestDistance |
| chr5 | 12591826  | 12592703 | 878  | -1.34 | 0.00047  | 0.00393  | ENSMUSG00000004025Sema3d      | protein_codi | 12383385 | 12588948 | downstream   | 208879  | 2878   | shortestDistance |
| chr5 | 12653334  | 12653620 | 287  | -2.6  | 3.07E-07 | 8.66E-06 | ENSMUSG00000010523Gm42580     | processed_p  | 12669155 | 12670728 | downstream   | 17251   | 15535  | shortestDistance |
| chr5 | 1266945   | 12669729 | 385  | -1.78 | 5.31E-05 | 0.000663 | ENSMUSG00000010523Gm42580     | processed_p  | 12669155 | 12670728 | inside       | 1191    | 190    | shortestDistance |
| chr5 | 12877535  | 12878255 | 721  | 1.26  | 0.000182 | 0.00183  | ENSMUSG00000009431Gm23243     | miRNA        | 12940370 | 12940479 | upstream     | -62475  | 62115  | shortestDistance |
| chr5 | 12936594  | 12937488 | 535  | -1.91 | 0.000248 | 0.00235  | ENSMUSG00000009431Gm23243     | miRNA        | 12940370 | 12940479 | upstream     | -3149   | 2882   | shortestDistance |
| chr5 | 13109659  | 13110007 | 349  | -1.35 | 0.00223  | 0.0134   | ENSMUSG00000006203Gm10108     | processed_p  | 13121448 | 13121766 | downstream   | 11933   | 11441  | shortestDistance |
| chr5 | 13460601  | 13461083 | 483  | -1.2  | 0.00186  | 0.0116   | ENSMUSG00000002888Sema3a      | protein_codi | 13125414 | 13602565 | inside       | 335428  | 14482  | shortestDistance |
| chr5 | 13509208  | 13509532 | 325  | 2.67  | 4.37E-07 | 1.17E-05 | ENSMUSG00000002888Sema3a      | protein_codi | 13125414 | 13602565 | inside       | 383956  | 93033  | shortestDistance |
| chr5 | 13551016  | 13551366 | 351  | 2.31  | 1.10E-06 | 2.53E-05 | ENSMUSG00000010462Gm42675     | TEC          | 13548694 | 13552728 | inside       | 2497    | 1362   | shortestDistance |
| chr5 | 13585584  | 13585898 | 315  | -1.34 | 0.000867 | 0.00637  | ENSMUSG00000002888Sema3a      | protein_codi | 13125414 | 13602565 | inside       | 460327  | 16667  | shortestDistance |
| chr5 | 13628648  | 13629401 | 754  | -1.18 | 0.000228 | 0.0022   | ENSMUSG0000001049Cg43718      | TEC          | 13615959 | 13617815 | upstream     | -11209  | 10833  | shortestDistance |
| chr5 | 14025128  | 14025780 | 653  | -1.3  | 0.000286 | 0.00264  | ENSMUSG00000006353Sema3e      | protein_codi | 14025276 | 14256689 | overlapStart | 178     | 148    | shortestDistance |
| chr5 | 14032119  | 14032399 | 281  | -3.13 | 6.41E-10 | 4.41E-08 | ENSMUSG00000006353Sema3e      | protein_codi | 14025276 | 14256689 | inside       | 6983    | 6843   | shortestDistance |
| chr5 | 14230872  | 14231335 | 464  | -1.45 | 0.00168  | 0.0108   | ENSMUSG00000006353Sema3e      | protein_codi | 14025276 | 14256689 | inside       | 205828  | 25354  | shortestDistance |
| chr5 | 14389234  | 14389541 | 308  | -1.05 | 0.00316  | 0.0175   | ENSMUSG0000000616Cplo         | protein_codi | 14514918 | 14863459 | upstream     | -125530 | 125377 | shortestDistance |
| chr5 | 14514574  | 14515649 | 1076 | -1.47 | 9.41E-05 | 0.00106  | ENSMUSG0000000616Cplo         | protein_codi | 14514918 | 14863459 | overlapStart | 194     | 344    | shortestDistance |
| chr5 | 14806808  | 14807034 | 227  | -1.27 | 0.00235  | 0.0139   | ENSMUSG0000000616Cplo         | protein_codi | 14514918 | 14863459 | inside       | 292003  | 56425  | shortestDistance |
| chr5 | 14807168  | 14807513 | 346  | -1.12 | 0.000578 | 0.00463  | ENSMUSG0000000616Cplo         | protein_codi | 14514918 | 14863459 | inside       | 294222  | 55946  | shortestDistance |
| chr5 | 15498815  | 15499451 | 637  | -1.3  | 0.00263  | 0.0152   | ENSMUSG00000009423Gm21847     | antisense_RI | 15516489 | 15656679 | upstream     | -17356  | 17038  | shortestDistance |
| chr5 | 15506674  | 15506950 | 277  | -1.24 | 0.00305  | 0.017    | ENSMUSG00000009423Gm21847     | antisense_RI | 15516489 | 15656679 | upstream     | -9677   | 9539   | shortestDistance |
| chr5 | 15610759  | 15611040 | 282  | -1.16 | 0.00324  | 0.0178   | ENSMUSG00000009423Gm21847     | antisense_RI | 15516489 | 15656679 | inside       | 94411   | 45639  | shortestDistance |
| chr5 | 15652388  | 15652824 | 437  | -2.08 | 1.39E-07 | 4.38E-06 | ENSMUSG00000006972909572003   | protein_codi | 15652286 | 15657059 | inside       | 4453    | 102    | shortestDistance |
| chr5 | 15799642  | 15799851 | 210  | -1.47 | 0.000813 | 0.00606  | ENSMUSG0000000732Cspeerdc     | protein_codi | 15709501 | 15714271 | inside       | 4525    | 141    | shortestDistance |
| chr5 | 15838052  | 15838506 | 455  | -1.08 | 0.000972 | 0.00697  | ENSMUSG000000105184930519H02l | lincRNA      | 15863928 | 15883829 | downstream   | 45550   | 25422  | shortestDistance |
| chr5 | 15934074  | 15935740 | 1667 | -0.93 | 0.00539  | 0.0264   | ENSMUSG00000004011Cacna2d1    | protein_codi | 15934691 | 16374511 | overlapStart | 216     | 617    | shortestDistance |
| chr5 | 16410059  | 16410600 | 542  | -1.17 | 0.000128 | 0.00137  | ENSMUSG00000004011Cacna2d1    | protein_codi | 15934691 | 16374511 | downstream   | 475639  | 35548  | shortestDistance |
| chr5 | 16424726  | 16425135 | 410  | 1.6   | 5.36E-05 | 0.000668 | ENSMUSG00000004011Cacna2d1    | protein_codi | 15934691 | 16374511 | downstream   | 490239  | 50215  | shortestDistance |
| chr5 | 16434558  | 16435018 | 461  | 1.74  | 4.32E-05 | 0.00056  | ENSMUSG00000004011Cacna2d1    | protein_codi | 15934691 | 16374511 | downstream   | 500097  | 60047  | shortestDistance |
| chr5 | 164477043 | 16447371 | 329  | 2.24  | 3.42E-06 | 6.66E-05 | ENSMUSG00000009794Gm8984      | processed_p  | 16508165 | 16509183 | downstream   | 61976   | 60794  | shortestDistance |
| chr5 | 16537849  | 16538473 | 625  | -1.09 | 0.00184  | 0.0115   | ENSMUSG00000002886Hgf         | protein_codi | 16553495 | 16620152 | upstream     | -15334  | 15022  | shortestDistance |
| chr5 | 16541697  | 16542207 | 511  | 1.6   | 1.74E-05 | 0.000263 | ENSMUSG00000002886Hgf         | protein_codi | 16553495 | 16620152 | upstream     | -11543  | 11288  | shortestDistance |
| chr5 | 16650179  | 16650632 | 454  | 2.61  | 2.46E-09 | 1.40E-07 | ENSMUSG00000002886Hgf         | protein_codi | 16553495 | 16620152 | downstream   | 96911   | 30027  | shortestDistance |
| chr5 | 16683602  | 16683945 | 344  | 2.02  | 7.73E-06 | 0.000133 | ENSMUSG00000005917Gm8991      | processed_p  | 16729996 | 16731070 | downstream   | 47296   | 46051  | shortestDistance |
| chr5 | 16699187  | 16699965 | 779  | -0.98 | 0.0103   | 0.0434   | ENSMUSG00000005917Gm8991      | processed_p  | 16729996 | 16731070 | downstream   | 31494   | 30031  | shortestDistance |
| chr5 | 16947457  | 16948038 | 582  | -1.17 | 0.0015   | 0.0098   | ENSMUSG00000010570Gm42855     | processed_p  | 16981036 | 16981288 | upstream     | -33288  | 32998  | shortestDistance |
| chr5 | 17008528  | 17008814 | 287  | 1.51  | 0.000856 | 0.00631  | ENSMUSG00000010570Gm42855     | processed_p  | 16981036 | 16981288 | downstream   | 27635   | 27240  | shortestDistance |
| chr5 | 17391309  | 17391544 | 236  | -1.58 | 5.21E-05 | 0.000654 | ENSMUSG                       |              |          |          |              |         |        |                  |

|      |          |          |      |       |          |          |                              |              |          |          |              |         |        |                  |
|------|----------|----------|------|-------|----------|----------|------------------------------|--------------|----------|----------|--------------|---------|--------|------------------|
| chr5 | 20456110 | 20456527 | 418  | -0.88 | 0.00877  | 0.0384   | ENSMUSG000000400C Magi2      | protein_codi | 19227036 | 20704792 | inside       | 1229282 | 248265 | shortestDistance |
| chr5 | 20493990 | 20494386 | 397  | -1.22 | 0.000707 | 0.00543  | ENSMUSG000000400C Magi2      | protein_codi | 19227036 | 20704792 | inside       | 1267152 | 210406 | shortestDistance |
| chr5 | 20508700 | 20508943 | 244  | -1.18 | 0.00612  | 0.0291   | ENSMUSG000000400C Magi2      | protein_codi | 19227036 | 20704792 | inside       | 1281786 | 195849 | shortestDistance |
| chr5 | 20512723 | 20513120 | 398  | -1.04 | 0.00926  | 0.04     | ENSMUSG000000400C Magi2      | protein_codi | 19227036 | 20704792 | inside       | 1285886 | 191672 | shortestDistance |
| chr5 | 20749374 | 20750281 | 908  | -1.06 | 0.000697 | 0.00537  | ENSMUSG000000399H Phtf2      | protein_codi | 20758663 | 20882124 | downstream   | 132296  | 8382   | shortestDistance |
| chr5 | 20778282 | 20779049 | 768  | -2.08 | 9.28E-06 | 0.000155 | ENSMUSG000000399H Phtf2      | protein_codi | 20758663 | 20882124 | inside       | 103458  | 19619  | shortestDistance |
| chr5 | 20779172 | 20779522 | 351  | -1.93 | 0.000113 | 0.00123  | ENSMUSG000000399H Phtf2      | protein_codi | 20758663 | 20882124 | inside       | 1027777 | 20509  | shortestDistance |
| chr5 | 20821694 | 20822008 | 315  | -2.78 | 3.35E-07 | 9.35E-06 | ENSMUSG000000399H Phtf2      | protein_codi | 20758663 | 20882124 | inside       | 60273   | 60116  | shortestDistance |
| chr5 | 20924680 | 20924978 | 299  | -1.16 | 0.00358  | 0.0192   | ENSMUSG000000399E Rsnb1      | protein_codi | 20893028 | 20956398 | inside       | 31569   | 31420  | shortestDistance |
| chr5 | 21115577 | 21115910 | 334  | 2.06  | 7.28E-06 | 0.000126 | ENSMUSG0000000871 Gm22490    | snoRNA       | 21117083 | 21117201 | downstream   | 1457    | 1173   | shortestDistance |
| chr5 | 21131130 | 21131678 | 549  | 1.54  | 0.00485  | 0.0243   | ENSMUSG000001061C Gm42660    | TEC          | 21131076 | 21132022 | inside       | 328     | 54     | shortestDistance |
| chr5 | 21131915 | 21132323 | 409  | 1.73  | 0.000434 | 0.00369  | ENSMUSG000001061C Gm42660    | TEC          | 21131076 | 21132022 | overlapEnd   | 1043    | 107    | shortestDistance |
| chr5 | 21188439 | 21188816 | 378  | 2.28  | 2.13E-07 | 6.34E-06 | ENSMUSG0000003993 Gsap       | protein_codi | 21186255 | 21315132 | inside       | 2373    | 2184   | shortestDistance |
| chr5 | 21188970 | 21189451 | 482  | 2.39  | 4.52E-09 | 2.33E-07 | ENSMUSG0000003993 Gsap       | protein_codi | 21186255 | 21315132 | inside       | 2955    | 2715   | shortestDistance |
| chr5 | 21263053 | 21263547 | 495  | -1.34 | 0.000857 | 0.00631  | ENSMUSG0000003993 Gsap       | protein_codi | 21186255 | 21315132 | inside       | 77045   | 51585  | shortestDistance |
| chr5 | 21378469 | 21378702 | 234  | -1.49 | 0.000285 | 0.00263  | ENSMUSG0000006428 Cdc146     | protein_codi | 21292961 | 21424677 | inside       | 46091   | 45975  | shortestDistance |
| chr5 | 21482540 | 21483417 | 878  | -2.11 | 7.00E-09 | 3.43E-07 | ENSMUSG0000004722 Fam185a    | protein_codi | 21424958 | 21482124 | downstream   | 58020   | 416    | shortestDistance |
| chr5 | 21611007 | 21611451 | 445  | 1.21  | 0.00121  | 0.00827  | ENSMUSG0000004852 Fbxl13     | protein_codi | 21483847 | 21645634 | inside       | 34405   | 34183  | shortestDistance |
| chr5 | 21930993 | 21931605 | 613  | -2.18 | 1.08E-08 | 4.99E-07 | ENSMUSG00000007315 Gm10475   | antisense_RI | 21910931 | 21954041 | inside       | 20368   | 20062  | shortestDistance |
| chr5 | 22160943 | 22161685 | 743  | -1.6  | 0.000383 | 0.00335  | ENSMUSG00000004245 Rein      | protein_codi | 21884454 | 22344702 | inside       | 183388  | 183017 | shortestDistance |
| chr5 | 22224589 | 22224829 | 241  | -1.89 | 0.000147 | 0.00153  | ENSMUSG00000004245 Rein      | protein_codi | 21884454 | 22344702 | inside       | 119993  | 119873 | shortestDistance |
| chr5 | 22345370 | 22345694 | 325  | -1.27 | 0.00169  | 0.0108   | ENSMUSG00000004245 Rein      | protein_codi | 21884454 | 22344702 | upstream     | -830    | 668    | shortestDistance |
| chr5 | 22360466 | 22360927 | 462  | -1.25 | 0.00326  | 0.0179   | ENSMUSG0000000857 Gm25459    | snoRNA       | 22359164 | 22359277 | upstream     | -1419   | 1189   | shortestDistance |
| chr5 | 22485613 | 22486209 | 597  | -2.13 | 5.52E-08 | 2.01E-06 | ENSMUSG0000002901 Orc5       | protein_codi | 22486485 | 22550429 | downstream   | 64518   | 276    | shortestDistance |
| chr5 | 22549552 | 22550657 | 1106 | -0.89 | 0.00351  | 0.0189   | ENSMUSG0000002901 Orc5       | protein_codi | 22486485 | 22550429 | overlapStart | 325     | 228    | shortestDistance |
| chr5 | 22745776 | 22746690 | 915  | -0.91 | 0.012    | 0.0486   | ENSMUSG0000010507 A930003013 | lincRNA      | 22738910 | 22746907 | inside       | 674     | 217    | shortestDistance |
| chr5 | 22856539 | 22856827 | 289  | -1.06 | 0.00764  | 0.0345   | ENSMUSG0000010637 Lhfp13     | protein_codi | 22746059 | 23275597 | inside       | 110624  | 110480 | shortestDistance |
| chr5 | 23010473 | 23010871 | 399  | -1.55 | 2.69E-05 | 0.000378 | ENSMUSG0000010637 Lhfp13     | protein_codi | 22746059 | 23275597 | inside       | 264613  | 264414 | shortestDistance |
| chr5 | 23111360 | 23111621 | 262  | -1.83 | 0.000594 | 0.00473  | ENSMUSG0000010637 Lhfp13     | protein_codi | 22746059 | 23275597 | inside       | 365431  | 136976 | shortestDistance |
| chr5 | 23409858 | 23410672 | 815  | 1.38  | 0.000144 | 0.00151  | ENSMUSG00000007315 Gm10475   | lincRNA      | 23382308 | 23434269 | inside       | 24004   | 23597  | shortestDistance |
| chr5 | 23518657 | 23519078 | 422  | -1.45 | 0.0022   | 0.0133   | ENSMUSG0000006260 Srp2c      | protein_codi | 23503264 | 23684617 | inside       | 165749  | 15393  | shortestDistance |
| chr5 | 23521627 | 23522153 | 527  | 2.14  | 2.04E-06 | 4.28E-05 | ENSMUSG0000006260 Srp2c      | protein_codi | 23503264 | 23684617 | inside       | 1627727 | 18363  | shortestDistance |
| chr5 | 23586545 | 23587335 | 791  | 2.68  | 2.28E-10 | 1.85E-08 | ENSMUSG0000006260 Srp2c      | protein_codi | 23503264 | 23684617 | inside       | 97677   | 83281  | shortestDistance |
| chr5 | 23612880 | 23613134 | 255  | 3.57  | 1.77E-10 | 1.49E-08 | ENSMUSG0000006260 Srp2c      | protein_codi | 23503264 | 23684617 | inside       | 71610   | 71483  | shortestDistance |
| chr5 | 24024985 | 24029825 | 341  | -0.9  | 0.00574  | 0.0277   | ENSMUSG0000002899 Fam126a    | protein_codi | 23915276 | 24030690 | inside       | 1035    | 865    | shortestDistance |
| chr5 | 24110121 | 24110425 | 305  | 1.16  | 0.00595  | 0.0285   | ENSMUSG0000002898 Khl7       | protein_codi | 24100605 | 24160792 | inside       | 9668    | 9616   | shortestDistance |
| chr5 | 24329224 | 24330261 | 1038 | -0.89 | 0.00539  | 0.0264   | ENSMUSG0000003831 Kcnh2      | protein_codi | 24319589 | 24351604 | inside       | 21862   | 9635   | shortestDistance |
| chr5 | 24344630 | 24345132 | 773  | -1.7  | 5.84E-07 | 1.48E-05 | ENSMUSG0000003831 Kcnh2      | protein_codi | 24319589 | 24351604 | inside       | 6858    | 6472   | shortestDistance |
| chr5 | 24413038 | 24413468 | 431  | -1.47 | 7.94E-05 | 0.000921 | ENSMUSG0000003827 Asi3c      | protein_codi | 24413392 | 24417835 | overlapStart | -139    | 76     | shortestDistance |
| chr5 | 24425053 | 24425406 | 354  | 0.86  | 0.00746  | 0.0339   | ENSMUSG0000002896 Slc4a2     | protein_codi | 24423837 | 24440950 | inside       | 1393    | 1216   | shortestDistance |
| chr5 | 24827073 | 24827596 | 524  | 1.12  | 0.00185  | 0.0116   | ENSMUSG0000002894 Rheb       | protein_codi | 24802823 | 24842624 | inside       | 15290   | 15028  | shortestDistance |
| chr5 | 25086997 | 25087292 | 296  | 1.02  | 0.00706  | 0.0325   | ENSMUSG0000002894 Pkag2      | protein_codi | 24862744 | 25100642 | inside       | 13498   | 13350  | shortestDistance |
| chr5 | 25165227 | 25165483 | 257  | -1.12 | 0.0118   | 0.048    | ENSMUSG0000002893 Gm26051    | miRNA        | 25168372 | 25168464 | downstream   | 3109    | 2889   | shortestDistance |
| chr5 | 25181013 | 25181619 | 607  | 0.92  | 0.0105   | 0.0442   | ENSMUSG0000002893 Galnt15    | protein_codi | 25181460 | 25220297 | overlapStart | -144    | 159    | shortestDistance |
| chr5 | 25475777 | 25476245 | 469  | 2.69  | 2.85E-10 | 2.23E-08 | ENSMUSG0000003805 Kmt2c      | protein_codi | 25271798 | 25498783 | inside       | 22772   | 22538  | shortestDistance |
| chr5 | 25759555 | 25760495 | 941  | -0.81 | 0.00667  | 0.0311   | ENSMUSG0000005636 Actr3b     | protein_codi | 25759997 | 25850688 | overlapStart | 28      | 442    | shortestDistance |
| chr5 | 25837492 | 25837773 | 282  | -1.65 | 0.00263  | 0.0152   | ENSMUSG0000005636 Actr3b     | protein_codi | 25759997 | 25850688 | inside       | 77635   | 12915  | shortestDistance |
| chr5 | 25846650 | 25846901 | 252  | -1.71 | 0.00141  | 0.00932  | ENSMUSG0000005636 Actr3b     | protein_codi | 25759997 | 25850688 | inside       | 86779   | 3787   | shortestDistance |
| chr5 | 25846944 | 25847637 | 694  | -1.84 | 0.000492 | 0.00408  | ENSMUSG0000005636 Actr3b     | protein_codi | 25759997 | 25850688 | inside       | 87293   | 3051   | shortestDistance |
| chr5 | 26282365 | 26282632 | 268  | -1.11 | 0.00449  | 0.023    | ENSMUSG0000000596 Gm7361     | protein_codi | 26257691 | 26264308 | downstream   | 24807   | 18057  | shortestDistance |
| chr5 | 27194176 | 27194507 | 332  | 1.33  | 0.000429 | 0.00366  | ENSMUSG0000006157 Dpp6       | protein_codi | 26817203 | 27277505 | inside       | 377139  | 376973 | shortestDistance |
| chr5 | 27206143 | 27206766 | 624  | -0.8  | 0.00749  | 0.034    | ENSMUSG0000006157 Dpp6       | protein_codi | 26817203 | 27277505 | inside       | 389251  | 388940 | shortestDistance |
| chr5 | 27615862 | 27616155 | 294  | -1.1  | 0.00449  | 0.0229   | ENSMUSG0000006157 Dpp6       | protein_codi | 26817203 | 27277505 | inside       | 798005  | 111350 | shortestDistance |
| chr5 | 27677355 | 27677673 | 319  | -1.14 | 0.00628  | 0.0297   | ENSMUSG0000006157 Dpp6       | protein_codi | 26817203 | 27277505 | inside       | 860311  | 49832  | shortestDistance |
| chr5 | 27680536 | 27681015 | 480  | -1.15 | 0.00264  | 0.0152   | ENSMUSG0000006157 Dpp6       | protein_codi | 26817203 | 27277505 | inside       | 863573  | 46490  | shortestDistance |
| chr5 | 27708103 | 27708862 | 760  | -1.57 | 2.17E-05 | 0.000316 | ENSMUSG0000006157 Dpp6       | protein_codi | 26817203 | 27277505 | inside       | 891279  | 18643  | shortestDistance |
| chr5 | 27750955 | 27751295 | 341  | -2.27 | 7.35E-07 | 1.81E-05 | ENSMUSG0000000222 Paxip1     | protein_codi | 27740080 | 27791691 | inside       | 40566   | 10875  | shortestDistance |
| chr5 | 28084683 | 28085296 | 614  | -1.41 | 4.01E-05 | 0.000527 | ENSMUSG00000004529 Insig1    | protein_codi | 28071363 | 28078662 | downstream   | 13627   | 6021   | shortestDistance |
| chr5 | 28090609 | 28090882 | 274  | -1.34 | 0.000556 | 0.00449  | ENSMUSG00000004529 Insig1    | protein_codi | 28071363 | 28078662 | downstream   | 19383   | 11947  | shortestDistance |
| chr5 | 29289825 | 29290530 | 706  | 241   | 8.11E-08 | 2.79E-06 | ENSMUSG0000001072 Lmbr1      | protein_codi | 29229802 | 29378390 | inside       | 88212   | 60023  | shortestDistance |
| chr5 | 29771019 | 29771259 | 241  | 2.32  | 0.000132 | 0.0014   | ENSMUSG00000002913 Dnajb6    | protein_codi | 29735688 | 29818134 | inside       | 35451   | 35331  | shortestDistance |
| chr5 | 29772022 | 29772352 | 331  | 1.39  | 0.000424 | 0.00362  | ENSMUSG00000002913 Dnajb6    | protein_codi | 29735688 | 29818134 | inside       | 36499   | 36334  | shortestDistance |
| chr5 | 29784702 | 29785251 | 550  | 2.91  | 3.85E-08 | 1.49E-06 | ENSMUSG00000002913 Dnajb6    | protein_codi | 29735688 | 29818134 | inside       | 49288   | 32883  | shortestDistance |
| chr5 | 29845079 | 29845406 | 328  | 1.62  | 0.00102  | 0.00725  | ENSMUSG0000010655 Gm1969     | processed_g  | 29832088 | 29833307 | upstream     | -11935  | 11772  | shortestDistance |
| chr5 | 29948046 | 29948591 | 546  | 1.57  | 0.000484 | 0.00403  | ENSMUSG0000010592 Gm43386    | TEC          | 29946718 | 29950718 | inside       | 2400    | 1328   | shortestDistance |
| chr5 | 29972822 | 29973128 | 307  | 2.03  | 7.68E-05 | 0.000897 | ENSMUSG0000010592 Gm43386    | TEC          | 29946718 | 29950718 | upstream     | -22257  | 22104  | shortestDistance |
| chr5 | 30207340 | 30207589 | 250  | 1.22  | 0.00825  | 0.0367   | ENSMUSG0000006674 Adgrf3     | protein_codi | 30193431 | 30205722 | upstream     | -1742   | 1618   | shortestDistance |
| chr5 | 30369404 | 30369814 | 411  | 1.11  | 0.00572  | 0.0277   | ENSMUSG0000006237 Otof       | protein_codi | 30367062 | 30461932 | inside       | 92323   | 2342   | shortestDistance |
| chr5 | 30915834 | 30916506 | 673  | 1.12  | 0.00058  | 0.00465  | ENSMUSG00000002916 Emilin1   | protein_codi | 30913402 | 30921277 | inside       | 2768    | 2432   | shortestDistance |
| chr5 | 31526655 | 31527560 | 906  | 1.17  | 0.00915  | 0.0397   | ENSMUSG00000005313 Supt7f    | protein_codi | 31514564 | 31527807 | inside       | 699     | 247    | shortestDistance |
| chr5 | 31636745 | 31637477 | 733  | 3.34  | 1.13E-08 | 5.21E-07 | ENSMUSG0000010561 Gm43809    | processed_tr | 31596938 | 31701972 | inside       | 40173   | 39807  | shortestDistance |
| chr5 | 31640609 | 31640882 | 274  | 3.9   | 1.26E-10 | 1.12E-08 | ENSMUSG0000010561 Gm43809    | processed_tr | 31596938 | 31701972 | inside       | 43808   | 43671  | shortestDistance |
| chr5 | 32122015 | 32122785 | 771  | 1.6   | 2.12E-05 | 0.00031  | ENSMUSG0000010275 Gm10463    |              |          |          |              |         |        |                  |

|        |          |          |      |       |          |          |                              |              |          |          |              |         |        |                  |
|--------|----------|----------|------|-------|----------|----------|------------------------------|--------------|----------|----------|--------------|---------|--------|------------------|
| chr5   | 38260060 | 38260870 | 811  | -0.85 | 0.00675  | 0.0314   | ENSMUSG0000006736Tmem128     | protein_codi | 38260185 | 38269634 | overlapStart | 280     | 125    | shortestDistance |
| chr5   | 38307558 | 38308120 | 563  | -0.81 | 0.00978  | 0.0418   | ENSMUSG0000005159Otop1       | protein_codi | 38275972 | 38304217 | downstream   | 31867   | 3341   | shortestDistance |
| chr5   | 38308958 | 38309272 | 315  | -0.96 | 0.00052  | 0.0257   | ENSMUSG0000005159Otop1       | protein_codi | 38275972 | 38304217 | downstream   | 33143   | 4741   | shortestDistance |
| chr5   | 38366465 | 38367482 | 1018 | -0.82 | 0.00879  | 0.0385   | ENSMUSG0000000510Slc2a9      | protein_codi | 38349273 | 38503143 | inside       | 136169  | 17192  | shortestDistance |
| chr5   | 38479703 | 38480421 | 719  | -0.9  | 0.00354  | 0.0191   | ENSMUSG0000000510Slc2a9      | protein_codi | 38349273 | 38503143 | inside       | 23081   | 22722  | shortestDistance |
| chr5   | 38516009 | 38516648 | 640  | -1.03 | 0.00177  | 0.0112   | ENSMUSG0000008964Gm15796     | processed_p  | 38507463 | 38507666 | downstream   | 8865    | 8343   | shortestDistance |
| chr5   | 38588722 | 38589684 | 963  | -1.09 | 0.000669 | 0.0052   | ENSMUSG0000008642A930421P071 | processed_p  | 38575031 | 38575429 | downstream   | 14172   | 13293  | shortestDistance |
| chr5   | 38824155 | 38824886 | 732  | -0.81 | 0.0105   | 0.044    | ENSMUSG0000003931Clnk        | protein_codi | 38706462 | 38876812 | inside       | 52292   | 51926  | shortestDistance |
| chr5   | 38844397 | 38844788 | 392  | -1.51 | 5.55E-05 | 0.000688 | ENSMUSG0000003931Clnk        | protein_codi | 38706462 | 38876812 | inside       | 32220   | 32024  | shortestDistance |
| chr5   | 38844963 | 38845493 | 531  | -1.29 | 0.00104  | 0.00733  | ENSMUSG0000003931Clnk        | protein_codi | 38706462 | 38876812 | inside       | 31584   | 31319  | shortestDistance |
| chr5   | 38876567 | 38877138 | 572  | -0.79 | 0.0107   | 0.0447   | ENSMUSG0000003931Clnk        | protein_codi | 38706462 | 38876812 | overlapStart | -40     | 245    | shortestDistance |
| chr5   | 38930969 | 38931371 | 403  | -1.19 | 0.000782 | 0.00587  | ENSMUSG0000003931Clnk        | protein_codi | 38706462 | 38876812 | upstream     | -54358  | 54157  | shortestDistance |
| chr5   | 38932377 | 38933682 | 1306 | -0.91 | 0.00415  | 0.0216   | ENSMUSG0000003931Clnk        | protein_codi | 38706462 | 38876812 | upstream     | -56218  | 55565  | shortestDistance |
| chr5   | 38950577 | 38950831 | 255  | -2.16 | 5.40E-05 | 0.000673 | ENSMUSG0000010692Gm42857     | processed_p  | 39002693 | 39003031 | downstream   | 52327   | 51862  | shortestDistance |
| chr5   | 39181155 | 39181487 | 333  | -1.29 | 0.00801  | 0.0359   | ENSMUSG0000010679Gm40293     | lincRNA      | 39253950 | 39307084 | downstream   | 125763  | 72463  | shortestDistance |
| chr5   | 39327310 | 39327559 | 250  | -1.5  | 0.000458 | 0.00386  | ENSMUSG0000010687Gm43456     | processed_p  | 39337360 | 39337816 | downstream   | 10382   | 9801   | shortestDistance |
| chr5   | 39437733 | 39438221 | 489  | -1.33 | 0.000529 | 0.00431  | ENSMUSG0000010685A930421C121 | TEC          | 39442001 | 39443574 | downstream   | 5597    | 3780   | shortestDistance |
| chr5   | 39613602 | 39613882 | 281  | -1.32 | 0.0101   | 0.0429   | ENSMUSG0000001021H3st1       | protein_codi | 39613935 | 39755475 | downstream   | 141733  | 53     | shortestDistance |
| chr5   | 39643965 | 39644226 | 262  | -1.36 | 0.000727 | 0.00554  | ENSMUSG00000005102H3st1      | protein_codi | 39613935 | 39755475 | inside       | 111379  | 30030  | shortestDistance |
| chr5   | 39644315 | 39644986 | 672  | -1.11 | 0.000537 | 0.00436  | ENSMUSG00000005102H3st1      | protein_codi | 39613935 | 39755475 | inside       | 110825  | 30380  | shortestDistance |
| chr5   | 39645052 | 39645327 | 276  | -1.6  | 3.08E-05 | 0.000423 | ENSMUSG00000005102H3st1      | protein_codi | 39613935 | 39755475 | inside       | 110285  | 31117  | shortestDistance |
| chr5   | 39715048 | 39715537 | 490  | -1.44 | 0.000111 | 0.00122  | ENSMUSG00000005102H3st1      | protein_codi | 39613935 | 39755475 | inside       | 40183   | 39938  | shortestDistance |
| chr5   | 39715757 | 39716653 | 897  | -1.68 | 0.000113 | 0.00123  | ENSMUSG00000005102H3st1      | protein_codi | 39613935 | 39755475 | inside       | 39270   | 38822  | shortestDistance |
| chr5   | 39733431 | 39734159 | 729  | -1.53 | 0.000191 | 0.00191  | ENSMUSG00000005102H3st1      | protein_codi | 39613935 | 39755475 | inside       | 21680   | 21316  | shortestDistance |
| chr5   | 39759841 | 39759487 | 647  | -1.3  | 0.000502 | 0.00414  | ENSMUSG00000005102H3st1      | protein_codi | 39613935 | 39755475 | upstream     | -3689   | 3366   | shortestDistance |
| chr5   | 39802105 | 39802692 | 588  | -2.54 | 5.87E-06 | 0.000105 | ENSMUSG0000008326Gm7816      | processed_p  | 39798214 | 39799407 | downstream   | 4184    | 2698   | shortestDistance |
| chr5   | 39804638 | 39805070 | 433  | -2.38 | 5.39E-11 | 5.50E-09 | ENSMUSG0000008326Gm7816      | processed_p  | 39798214 | 39799407 | downstream   | 6640    | 5231   | shortestDistance |
| chr5   | 39832473 | 39833102 | 630  | -2.21 | 1.16E-07 | 3.77E-06 | ENSMUSG0000008326Gm7816      | processed_p  | 39798214 | 39799407 | downstream   | 34574   | 33066  | shortestDistance |
| chr5   | 40919966 | 40920255 | 290  | -1.52 | 0.00163  | 0.0105   | ENSMUSG0000010686A930519E071 | TEC          | 41281236 | 41282900 | upstream     | -361126 | 360981 | shortestDistance |
| chr5   | 40952917 | 40953466 | 550  | -1.03 | 0.00174  | 0.0111   | ENSMUSG0000010686A930519E071 | TEC          | 41281236 | 41282900 | upstream     | -328044 | 327770 | shortestDistance |
| chr5   | 41052002 | 41052329 | 328  | -1.53 | 0.000181 | 0.00182  | ENSMUSG0000010686A930519E071 | TEC          | 41281236 | 41282900 | upstream     | -229070 | 228907 | shortestDistance |
| chr5   | 41125080 | 41125375 | 296  | -1.14 | 0.00327  | 0.018    | ENSMUSG0000010686A930519E071 | TEC          | 41281236 | 41282900 | upstream     | -156008 | 155861 | shortestDistance |
| chr5   | 41610624 | 41611041 | 418  | -1.57 | 0.0016   | 0.0103   | ENSMUSG00000002912Rab28      | protein_codi | 41624976 | 41708157 | downstream   | 97325   | 13935  | shortestDistance |
| chr5   | 41627449 | 41628030 | 582  | -1.24 | 0.00175  | 0.0111   | ENSMUSG00000002912Rab28      | protein_codi | 41624976 | 41708157 | inside       | 80417   | 2473   | shortestDistance |
| chr5   | 41761482 | 41762395 | 914  | -0.99 | 0.00192  | 0.0119   | ENSMUSG00000004968Nkx3-2     | protein_codi | 41761483 | 41764501 | overlapEnd   | 2563    | 1      | shortestDistance |
| chr5   | 41767442 | 41767824 | 383  | -1.25 | 0.00014  | 0.00147  | ENSMUSG00000004968Nkx3-2     | protein_codi | 41761483 | 41764501 | upstream     | -3132   | 2941   | shortestDistance |
| chr5   | 41884601 | 41884994 | 394  | -0.84 | 0.0123   | 0.0497   | ENSMUSG00000009826Mir6414    | miRNA        | 41891342 | 41891423 | upstream     | -6544   | 6348   | shortestDistance |
| chr5   | 41887727 | 41888113 | 387  | -1.09 | 0.000876 | 0.00641  | ENSMUSG00000009826Mir6414    | miRNA        | 41891342 | 41891423 | upstream     | -3422   | 3229   | shortestDistance |
| chr5   | 42412338 | 42412664 | 327  | -1.18 | 0.000867 | 0.00637  | ENSMUSG00000009826Mir6414    | processed_p  | 42499981 | 42500414 | downstream   | 87913   | 87317  | shortestDistance |
| chr5   | 42976981 | 42977794 | 814  | -1.72 | 1.15E-05 | 0.000186 | ENSMUSG0000010652Gm5554      | processed_p  | 42963404 | 42964609 | upstream     | -12779  | 12372  | shortestDistance |
| chr5   | 43048231 | 43049019 | 789  | 1.39  | 4.01E-05 | 0.000527 | ENSMUSG0000010650Gm42711     | lincRNA      | 43039737 | 43044061 | upstream     | -4564   | 4170   | shortestDistance |
| chr5   | 43051019 | 43051647 | 629  | 1.33  | 0.00246  | 0.0144   | ENSMUSG0000010650Gm42711     | lincRNA      | 43039737 | 43044061 | upstream     | -7272   | 6958   | shortestDistance |
| chr5   | 43101983 | 43102421 | 439  | 1.46  | 0.000204 | 0.002    | ENSMUSG0000010541Gm42553     | TEC          | 43059255 | 43060883 | downstream   | 42947   | 41100  | shortestDistance |
| chr5   | 43125583 | 43126174 | 322  | 2.41  | 8.38E-06 | 0.000142 | ENSMUSG0000010508Gm42552     | TEC          | 43143831 | 43148327 | downstream   | 22313   | 17657  | shortestDistance |
| chr5   | 43152094 | 43152944 | 851  | -1.2  | 0.000211 | 0.00206  | ENSMUSG0000008572Gm7854      | antisense_RI | 43151686 | 43235355 | inside       | 82836   | 408    | shortestDistance |
| chr5   | 43218109 | 43218685 | 577  | -1.23 | 0.00107  | 0.00752  | ENSMUSG0000008572Gm7854      | antisense_RI | 43151686 | 43235355 | inside       | 16958   | 16670  | shortestDistance |
| chr5   | 43227659 | 43227962 | 304  | 1.58  | 8.04E-05 | 0.00093  | ENSMUSG0000008572Gm7854      | antisense_RI | 43151686 | 43235355 | inside       | 7545    | 7393   | shortestDistance |
| chr5   | 43279728 | 43280296 | 569  | -1.58 | 1.06E-06 | 2.46E-05 | ENSMUSG0000003978Pcb2        | protein_codi | 43233170 | 43289724 | inside       | 46842   | 9428   | shortestDistance |
| chr5   | 43285772 | 43286112 | 341  | -1.68 | 3.37E-05 | 0.000457 | ENSMUSG0000003978Pcb2        | protein_codi | 43233170 | 43289724 | inside       | 52772   | 3612   | shortestDistance |
| chr5   | 43289743 | 43290392 | 650  | -1.26 | 2.96E-05 | 0.00041  | ENSMUSG0000003978Pcb2        | protein_codi | 43233170 | 43289724 | downstream   | 56898   | 19     | shortestDistance |
| chr5   | 43293133 | 43293513 | 381  | -0.97 | 0.00338  | 0.0184   | ENSMUSG0000003978Pcb2        | protein_codi | 43233170 | 43289724 | downstream   | 60153   | 3409   | shortestDistance |
| chr5   | 43300818 | 43301468 | 651  | -1.72 | 1.63E-07 | 5.05E-06 | ENSMUSG0000003978Pcb2        | protein_codi | 43233170 | 43289724 | downstream   | 67973   | 11094  | shortestDistance |
| chr5   | 43305345 | 43305828 | 484  | -1.58 | 4.05E-05 | 0.00053  | ENSMUSG0000003978Pcb2        | protein_codi | 43233170 | 43289724 | downstream   | 72416   | 15621  | shortestDistance |
| chr5   | 43422903 | 43423462 | 560  | -0.98 | 0.0024   | 0.0142   | ENSMUSG0000010724Gm43699     | lincRNA      | 43376447 | 43379637 | downstream   | 46735   | 43266  | shortestDistance |
| chr5   | 43457642 | 43458092 | 451  | 1.34  | 0.000681 | 0.00528  | ENSMUSG0000010469Gm43021     | lincRNA      | 43470692 | 43474853 | upstream     | -12825  | 12600  | shortestDistance |
| chr5   | 43508648 | 43509391 | 744  | -1.17 | 0.00114  | 0.00794  | ENSMUSG00000006153C1qnf7     | protein_codi | 43515538 | 43618803 | upstream     | -6518   | 6147   | shortestDistance |
| chr5   | 43550254 | 43550750 | 497  | -1.33 | 0.00207  | 0.0127   | ENSMUSG00000006153C1qnf7     | protein_codi | 43515538 | 43618803 | inside       | 34964   | 34716  | shortestDistance |
| chr5   | 43561536 | 43562308 | 773  | -1.22 | 0.000315 | 0.00285  | ENSMUSG00000008729Gm15866    | antisense_RI | 43549928 | 43601731 | inside       | 39809   | 11608  | shortestDistance |
| chr5   | 43582904 | 43583232 | 329  | -0.94 | 0.00694  | 0.0321   | ENSMUSG00000008729Gm15866    | antisense_RI | 43549928 | 43601731 | inside       | 18663   | 18499  | shortestDistance |
| chr5   | 43634653 | 43635044 | 482  | -1.28 | 0.00049  | 0.00406  | ENSMUSG00000006153C1qnf7     | protein_codi | 43515538 | 43618803 | downstream   | 119266  | 15760  | shortestDistance |
| chr5   | 43661992 | 43663053 | 1062 | -1.19 | 0.000857 | 0.00631  | ENSMUSG0000003976C2cd2a      | protein_codi | 43662346 | 43740972 | overlapStart | 176     | 354    | shortestDistance |
| chr5   | 43668178 | 43668597 | 420  | -1.1  | 0.000987 | 0.00706  | ENSMUSG0000003976C2cd2a      | protein_codi | 43662346 | 43740972 | inside       | 6042    | 5832   | shortestDistance |
| chr5   | 43669217 | 43669603 | 387  | -1.57 | 1.83E-06 | 3.92E-05 | ENSMUSG0000003976C2cd2a      | protein_codi | 43662346 | 43740972 | inside       | 7064    | 6871   | shortestDistance |
| chr5   | 43673565 | 43673969 | 405  | -1.6  | 5.41E-06 | 9.83E-05 | ENSMUSG0000003976C2cd2a      | protein_codi | 43662346 | 43740972 | inside       | 11421   | 11219  | shortestDistance |
| chr5   | 43788412 | 43788739 | 328  | 4.8   | 2.52E-15 | 1.34E-12 | ENSMUSG0000003975Fbxl5       | protein_codi | 43744615 | 43821638 | inside       | 33062   | 32899  | shortestDistance |
| chr5   | 43801726 | 43802178 | 453  | 1.51  | 0.000229 | 0.00221  | ENSMUSG0000003975Fbxl5       | protein_codi | 43744615 | 43821638 | inside       | 19686   | 19460  | shortestDistance |
| chr5   | 43826921 | 43827248 | 328  | 2.96  | 8.49E-09 | 4.04E-07 | ENSMUSG0000002908Bst1        | protein_codi | 43818885 | 43843986 | inside       | 8199    | 8036   | shortestDistance |
| chr5   | 43868550 | 43869674 | 1125 | -1.15 | 0.000864 | 0.00635  | ENSMUSG0000002908C3d8        | protein_codi | 43868553 | 43912375 | overlapStart | 559     | 3      | shortestDistance |
| chr5   | 43894108 | 43894447 | 340  | -1.03 | 0.00854  | 0.0376   | ENSMUSG0000002908C3d8        | protein_codi | 43868553 | 43912375 | inside       | 25725   | 17928  | shortestDistance |
| chr5   | 43915245 | 43915726 | 482  | 1.91  | 1.08E-05 | 0.000176 | ENSMUSG0000003985Gm7882      | processed_p  | 43916753 | 43918514 | upstream     | -1267   | 1027   | shortestDistance |
| chr5   | 43996160 | 43996576 | 417  | -1.52 | 0.000286 | 0.00264  | ENSMUSG0000002908Prom1       | protein_codi | 43993620 | 44102032 | inside       | 105664  | 2540   | shortestDistance |
| chr5   | 44075424 | 44075871 | 448  | 4.16  | 1.72E-15 | 9.54E-13 | ENSMUSG0000010526Gm42716     | processed_tr | 44068198 | 44090854 | inside       | 15206   | 7226   | shortestDistance |
| chr5</ |          |          |      |       |          |          |                              |              |          |          |              |         |        |                  |

|      |          |          |      |       |          |          |                   |            |              |          |          |              |         |        |                  |
|------|----------|----------|------|-------|----------|----------|-------------------|------------|--------------|----------|----------|--------------|---------|--------|------------------|
| chr5 | 47276354 | 47276587 | 234  | -1.21 | 0.00353  | 0.019    | ENSMUSG0000010466 | Gm43601    | TEC          | 47153651 | 47154595 | downstream   | 122819  | 121759 | shortestDistance |
| chr5 | 47322608 | 47323435 | 828  | -1.81 | 4.68E-06 | 8.70E-05 | ENSMUSG0000010466 | Gm43601    | TEC          | 47153651 | 47154595 | downstream   | 169371  | 168013 | shortestDistance |
| chr5 | 47429757 | 47430189 | 433  | -1.7  | 0.000959 | 0.0069   | ENSMUSG0000010640 | Gm17824    | processed_p  | 47634502 | 47635306 | upstream     | -204529 | 204313 | shortestDistance |
| chr5 | 47469348 | 47469817 | 470  | -1.2  | 0.000499 | 0.00412  | ENSMUSG0000010640 | Gm17824    | processed_p  | 47634502 | 47635306 | upstream     | -164920 | 164685 | shortestDistance |
| chr5 | 47513527 | 47513930 | 404  | -2    | 0.000306 | 0.00279  | ENSMUSG0000010640 | Gm17824    | processed_p  | 47634502 | 47635306 | upstream     | -120774 | 120572 | shortestDistance |
| chr5 | 47686730 | 47687079 | 350  | -1.2  | 0.00379  | 0.0201   | ENSMUSG0000010561 | Gm3010     | processed_p  | 47699845 | 47700292 | upstream     | -12941  | 12766  | shortestDistance |
| chr5 | 47979390 | 47979747 | 358  | -1.28 | 8.56E-05 | 0.000977 | ENSMUSG0000003155 | Slit2      | protein_codi | 47983138 | 48307733 | upstream     | -3570   | 3391   | shortestDistance |
| chr5 | 47982864 | 47983829 | 966  | -1.33 | 2.23E-05 | 0.000323 | ENSMUSG0000003155 | Slit2      | protein_codi | 47983138 | 48307733 | overlapStart | 208     | 274    | shortestDistance |
| chr5 | 47984274 | 47984512 | 239  | -1.22 | 0.00169  | 0.0108   | ENSMUSG0000003155 | Slit2      | protein_codi | 47983138 | 48307733 | inside       | 1255    | 1136   | shortestDistance |
| chr5 | 47985020 | 47985534 | 515  | -1.81 | 1.80E-07 | 5.51E-06 | ENSMUSG0000003155 | Slit2      | protein_codi | 47983138 | 48307733 | inside       | 2139    | 1882   | shortestDistance |
| chr5 | 48038048 | 48038662 | 615  | -1.62 | 1.01E-06 | 2.37E-05 | ENSMUSG0000003155 | Slit2      | protein_codi | 47983138 | 48307733 | inside       | 55217   | 54910  | shortestDistance |
| chr5 | 48113454 | 48113872 | 419  | -1.97 | 7.14E-07 | 1.77E-05 | ENSMUSG0000003155 | Slit2      | protein_codi | 47983138 | 48307733 | inside       | 130525  | 130316 | shortestDistance |
| chr5 | 48126078 | 48126382 | 305  | -1.21 | 0.00107  | 0.00751  | ENSMUSG0000003155 | Slit2      | protein_codi | 47983138 | 48307733 | inside       | 143092  | 142940 | shortestDistance |
| chr5 | 48138883 | 48139190 | 308  | -1.03 | 0.0071   | 0.0327   | ENSMUSG0000003155 | Slit2      | protein_codi | 47983138 | 48307733 | inside       | 155898  | 155745 | shortestDistance |
| chr5 | 48240630 | 48241139 | 510  | -1.25 | 0.000571 | 0.00458  | ENSMUSG0000003155 | Slit2      | protein_codi | 47983138 | 48307733 | inside       | 257746  | 257476 | shortestDistance |
| chr5 | 48286021 | 48286531 | 511  | -2.53 | 6.54E-10 | 4.50E-08 | ENSMUSG0000003155 | Slit2      | protein_codi | 47983138 | 48307733 | inside       | 303138  | 21202  | shortestDistance |
| chr5 | 48315155 | 48315589 | 475  | -1.3  | 0.000578 | 0.00463  | ENSMUSG0000003155 | Slit2      | protein_codi | 47983138 | 48307733 | downstream   | 332214  | 7382   | shortestDistance |
| chr5 | 48331339 | 48331881 | 543  | -0.95 | 0.00118  | 0.00812  | ENSMUSG0000002908 | 5730480H06 | protein_codi | 48327952 | 48414294 | inside       | 3658    | 3387   | shortestDistance |
| chr5 | 48345023 | 48345585 | 383  | -1.79 | 2.45E-05 | 0.000349 | ENSMUSG0000002908 | 5730480H06 | protein_codi | 48327952 | 48414294 | inside       | 17442   | 17251  | shortestDistance |
| chr5 | 48345716 | 48346017 | 302  | -1.18 | 0.00135  | 0.00904  | ENSMUSG0000002908 | 5730480H06 | protein_codi | 48327952 | 48414294 | inside       | 17914   | 17764  | shortestDistance |
| chr5 | 48349111 | 48349801 | 691  | -1.12 | 0.000646 | 0.00505  | ENSMUSG0000002908 | 5730480H06 | protein_codi | 48327952 | 48414294 | inside       | 21504   | 21159  | shortestDistance |
| chr5 | 48430507 | 48430839 | 333  | -1.4  | 0.000233 | 0.00223  | ENSMUSG0000002908 | Kcnip4     | protein_codi | 48389502 | 49524907 | inside       | 1094234 | 41005  | shortestDistance |
| chr5 | 48509331 | 48509986 | 656  | -2.03 | 3.78E-08 | 1.46E-06 | ENSMUSG0000002908 | Kcnip4     | protein_codi | 48389502 | 49524907 | inside       | 1015249 | 119829 | shortestDistance |
| chr5 | 48784134 | 48784520 | 387  | -1.93 | 2.15E-06 | 4.48E-05 | ENSMUSG0000002908 | Kcnip4     | protein_codi | 48389502 | 49524907 | inside       | 740580  | 394632 | shortestDistance |
| chr5 | 48942760 | 48943104 | 345  | -1.47 | 0.000497 | 0.00411  | ENSMUSG0000002908 | Kcnip4     | protein_codi | 48389502 | 49524907 | inside       | 581975  | 553258 | shortestDistance |
| chr5 | 49001873 | 49002409 | 537  | -1.2  | 0.00614  | 0.0292   | ENSMUSG0000002908 | Kcnip4     | protein_codi | 48389502 | 49524907 | inside       | 522766  | 522498 | shortestDistance |
| chr5 | 49090142 | 49090503 | 362  | -0.88 | 0.00671  | 0.0313   | ENSMUSG0000002908 | Kcnip4     | protein_codi | 48389502 | 49524907 | inside       | 434585  | 434404 | shortestDistance |
| chr5 | 49350448 | 49350941 | 494  | -1.43 | 0.000104 | 0.00115  | ENSMUSG0000002908 | Kcnip4     | protein_codi | 48389502 | 49524907 | inside       | 174213  | 173966 | shortestDistance |
| chr5 | 49712210 | 49712832 | 623  | -1.93 | 2.79E-06 | 5.60E-05 | ENSMUSG0000002908 | Kcnip4     | processed_p  | 49552158 | 49553268 | downstream   | 160363  | 158942 | shortestDistance |
| chr5 | 49961815 | 49962347 | 533  | -0.99 | 0.00944  | 0.0407   | ENSMUSG0000002909 | Adgr3      | protein_codi | 49959956 | 50059006 | inside       | 96255   | 1859   | shortestDistance |
| chr5 | 50026111 | 50026871 | 761  | -1.14 | 0.00379  | 0.0201   | ENSMUSG0000002909 | Adgr3      | protein_codi | 49959956 | 50059006 | inside       | 32515   | 32135  | shortestDistance |
| chr5 | 50027031 | 50027298 | 268  | -1.36 | 0.00401  | 0.021    | ENSMUSG0000002909 | Adgr3      | protein_codi | 49959956 | 50059006 | inside       | 31842   | 31708  | shortestDistance |
| chr5 | 50034170 | 50034829 | 660  | -1.03 | 0.00186  | 0.0117   | ENSMUSG0000002909 | Adgr3      | protein_codi | 49959956 | 50059006 | inside       | 24506   | 24177  | shortestDistance |
| chr5 | 50217042 | 50217381 | 340  | -1.24 | 0.00114  | 0.00792  | ENSMUSG0000010502 | Gm7205     | unprocessed  | 50217247 | 50391361 | overlapStart | -35     | 134    | shortestDistance |
| chr5 | 50278838 | 50279089 | 352  | -1.19 | 0.000688 | 0.00532  | ENSMUSG0000010532 | Gm43016    | lincRNA      | 50543642 | 50689221 | downstream   | 185272  | 39517  | shortestDistance |
| chr5 | 50752810 | 50753065 | 256  | -1.35 | 0.000459 | 0.00387  | ENSMUSG0000010532 | Gm43016    | lincRNA      | 50543642 | 50689221 | downstream   | 209296  | 63589  | shortestDistance |
| chr5 | 51070168 | 51071076 | 909  | -2.87 | 3.01E-06 | 5.97E-05 | ENSMUSG0000010626 | Gm40319    | processed_p  | 51052381 | 51052861 | downstream   | 18241   | 17307  | shortestDistance |
| chr5 | 51406378 | 51406751 | 374  | -1.92 | 7.80E-07 | 1.90E-05 | ENSMUSG0000002916 | Pparg1a    | protein_codi | 51454250 | 51567726 | downstream   | 161162  | 14799  | shortestDistance |
| chr5 | 51433893 | 51434259 | 367  | -1.93 | 9.77E-05 | 0.00109  | ENSMUSG0000002916 | Pparg1a    | protein_codi | 51454250 | 51567726 | downstream   | 133650  | 19991  | shortestDistance |
| chr5 | 51551944 | 51553204 | 1261 | -1.06 | 0.000416 | 0.00357  | ENSMUSG0000002916 | Pparg1a    | protein_codi | 51454250 | 51567726 | inside       | 15152   | 14522  | shortestDistance |
| chr5 | 51553684 | 51554193 | 510  | -1.19 | 0.000264 | 0.00247  | ENSMUSG0000002916 | Pparg1a    | protein_codi | 51454250 | 51567726 | inside       | 13788   | 13533  | shortestDistance |
| chr5 | 51563655 | 51563958 | 304  | -1.31 | 0.00176  | 0.0111   | ENSMUSG0000002916 | Pparg1a    | protein_codi | 51454250 | 51567726 | inside       | 3920    | 3768   | shortestDistance |
| chr5 | 51571377 | 51571997 | 261  | -1.51 | 0.000782 | 0.00587  | ENSMUSG0000002916 | Pparg1a    | protein_codi | 51454250 | 51567726 | upstream     | -4141   | 4011   | shortestDistance |
| chr5 | 51584419 | 51585458 | 1040 | -1.24 | 6.53E-05 | 0.000788 | ENSMUSG0000002916 | Pparg1a    | protein_codi | 51454250 | 51567726 | upstream     | -17212  | 16693  | shortestDistance |
| chr5 | 51591770 | 51592531 | 762  | -1.53 | 0.000258 | 0.00243  | ENSMUSG0000002916 | Pparg1a    | protein_codi | 51454250 | 51567726 | upstream     | -24424  | 24044  | shortestDistance |
| chr5 | 51610201 | 51610647 | 447  | -1.52 | 7.64E-05 | 0.000893 | ENSMUSG0000002916 | Pparg1a    | protein_codi | 51454250 | 51567726 | upstream     | -42698  | 42475  | shortestDistance |
| chr5 | 51725614 | 51725909 | 296  | -2.8  | 5.94E-08 | 2.14E-06 | ENSMUSG0000010566 | Gm43606    | TEC          | 51855220 | 51858775 | downstream   | 133013  | 129311 | shortestDistance |
| chr5 | 51835581 | 51835836 | 256  | -3.21 | 9.99E-09 | 4.68E-07 | ENSMUSG0000010566 | Gm43606    | TEC          | 51855220 | 51858775 | downstream   | 23067   | 19384  | shortestDistance |
| chr5 | 51853350 | 51854085 | 736  | -1.25 | 0.000171 | 0.00173  | ENSMUSG0000010566 | Gm43606    | TEC          | 51855220 | 51858775 | downstream   | 5057    | 1135   | shortestDistance |
| chr5 | 52006672 | 52007420 | 749  | -1.54 | 1.24E-05 | 0.000198 | ENSMUSG0000010629 | Gm43174    | TEC          | 52079888 | 52082332 | downstream   | 75286   | 72468  | shortestDistance |
| chr5 | 52042611 | 52042843 | 233  | -1.38 | 0.00274  | 0.0157   | ENSMUSG0000010629 | Gm43174    | TEC          | 52079888 | 52082332 | downstream   | 39605   | 37045  | shortestDistance |
| chr5 | 52075073 | 52075501 | 429  | 2.22  | 1.60E-07 | 4.96E-06 | ENSMUSG0000010629 | Gm43174    | TEC          | 52079888 | 52082332 | downstream   | 7045    | 4387   | shortestDistance |
| chr5 | 52119118 | 52119567 | 450  | 1.4   | 0.000617 | 0.00487  | ENSMUSG0000010484 | Gm43177    | lincRNA      | 52117312 | 52118523 | downstream   | 2030    | 595    | shortestDistance |
| chr5 | 52168316 | 52168841 | 526  | -1.02 | 0.00451  | 0.023    | ENSMUSG0000002916 | Dhx15      | protein_codi | 52150203 | 52190514 | inside       | 21936   | 18113  | shortestDistance |
| chr5 | 52233993 | 52234215 | 223  | -1.17 | 0.00965  | 0.0413   | ENSMUSG0000009714 | 9230114K14 | processed_tr | 52190672 | 52279034 | inside       | 43432   | 43321  | shortestDistance |
| chr5 | 52237482 | 52237785 | 304  | -1.7  | 0.00115  | 0.00799  | ENSMUSG0000009714 | 9230114K14 | processed_tr | 52190672 | 52279034 | inside       | 46962   | 41249  | shortestDistance |
| chr5 | 52470827 | 52471725 | 899  | -1.18 | 0.000519 | 0.00425  | ENSMUSG0000004579 | Cdc149     | protein_codi | 52374651 | 52471521 | overlapStart | 245     | 204    | shortestDistance |
| chr5 | 52565205 | 52565542 | 338  | -1.46 | 0.000692 | 0.00534  | ENSMUSG0000003925 | Iglt2      | protein_codi | 52533517 | 52566462 | inside       | 1088    | 920    | shortestDistance |
| chr5 | 52565744 | 52566471 | 728  | -1.45 | 0.000107 | 0.00118  | ENSMUSG0000003925 | Iglt2      | protein_codi | 52533517 | 52566462 | overlapStart | 354     | 9      | shortestDistance |
| chr5 | 52609635 | 52610221 | 587  | -1.64 | 0.000146 | 0.00152  | ENSMUSG0000005229 | 8030432F21 | lincRNA      | 52607550 | 52619012 | inside       | 9084    | 2085   | shortestDistance |
| chr5 | 52793073 | 52793601 | 529  | 2.3   | 3.46E-07 | 9.61E-06 | ENSMUSG0000002917 | Zcchc4     | protein_codi | 52775409 | 52824665 | inside       | 17928   | 17664  | shortestDistance |
| chr5 | 52794165 | 52794650 | 486  | 2.92  | 1.64E-08 | 7.18E-07 | ENSMUSG0000002917 | Zcchc4     | protein_codi | 52775409 | 52824665 | inside       | 18999   | 18756  | shortestDistance |
| chr5 | 52865636 | 52866254 | 619  | -1.31 | 2.82E-05 | 0.000393 | ENSMUSG0000002917 | Anapc4     | protein_codi | 52834012 | 52867797 | inside       | 31933   | 1543   | shortestDistance |
| chr5 | 52889801 | 52890525 | 725  | -1.39 | 4.57E-05 | 0.000587 | ENSMUSG0000002917 | Anapc4     | protein_codi | 52834012 | 52867797 | downstream   | 56151   | 22004  | shortestDistance |
| chr5 | 53140164 | 53140680 | 517  | -0.98 | 0.00804  | 0.0359   | ENSMUSG0000002918 | Sei1l3     | protein_codi | 53107083 | 53213927 | upstream     | 73505   | 33081  | shortestDistance |
| chr5 | 53378521 | 53379042 | 522  | 1.99  | 7.89E-06 | 0.000135 | ENSMUSG0000010680 | Gm42745    | lincRNA      | 53360656 | 53371774 | upstream     | -7008   | 6747   | shortestDistance |
| chr5 | 53385386 | 53386137 | 752  | 2.5   | 4.88E-09 | 2.49E-07 | ENSMUSG0000010680 | Gm42745    | lincRNA      | 53360656 | 53371774 | upstream     | -13988  | 13612  | shortestDistance |
| chr5 | 53402420 | 53403201 | 782  | 0.97  | 0.00504  | 0.025    | ENSMUSG0000008864 | Gm26486    | rRNA         | 53418573 | 53418682 | upstream     | -15763  | 15372  | shortestDistance |
| chr5 | 53415475 | 53415891 | 417  | 1.53  | 0.00371  | 0.0198   | ENSMUSG0000008864 | Gm26486    | rRNA         | 53418573 | 53418682 | upstream     | -2890   | 2682   | shortestDistance |
| chr5 | 53451860 | 53452228 | 369  | 3.14  | 1.03E-10 | 9.47E-09 | ENSMUSG0000003919 | Rbpj       | protein_codi | 53466152 | 53657362 | upstream     | -14108  | 13924  | shortestDistance |
| chr5 | 5350     |          |      |       |          |          |                   |            |              |          |          |              |         |        |                  |

|      |          |          |      |       |          |          |                    |             |              |          |          |              |        |        |                  |
|------|----------|----------|------|-------|----------|----------|--------------------|-------------|--------------|----------|----------|--------------|--------|--------|------------------|
| chr5 | 62858189 | 62858856 | 668  | -1.14 | 0.000259 | 0.00244  | ENSMUSG0000009032  | Dthd1       | protein_codi | 62813823 | 62888308 | inside       | 44699  | 29452  | shortestDistance |
| chr5 | 62895377 | 62895668 | 292  | -1.38 | 0.000369 | 0.00325  | ENSMUSG0000009032  | Dthd1       | protein_codi | 62813823 | 62888308 | downstream   | 81699  | 7069   | shortestDistance |
| chr5 | 63755902 | 63756422 | 521  | -1.19 | 0.000722 | 0.00551  | ENSMUSG0000009006  | Nwd2        | protein_codi | 63649102 | 63810546 | inside       | 107060 | 54124  | shortestDistance |
| chr5 | 63766786 | 63767122 | 337  | -1.15 | 0.00257  | 0.0149   | ENSMUSG0000009006  | Nwd2        | protein_codi | 63649102 | 63810546 | inside       | 117852 | 4424   | shortestDistance |
| chr5 | 63874823 | 63875272 | 450  | 1.24  | 0.00123  | 0.0084   | ENSMUSG0000006051  | 0610040101F | protein_codi | 63812363 | 63899625 | inside       | 62685  | 24353  | shortestDistance |
| chr5 | 64079148 | 64079800 | 653  | -1.3  | 0.000271 | 0.00253  | ENSMUSG0000002917  | Pgm1        | protein_codi | 64092950 | 64128351 | upstream     | -13476 | 13150  | shortestDistance |
| chr5 | 64157958 | 64158251 | 294  | -0.97 | 0.00837  | 0.0371   | ENSMUSG0000002917  | Tbc1d1      | protein_codi | 64156305 | 64351486 | inside       | 1799   | 1653   | shortestDistance |
| chr5 | 64188145 | 64188636 | 492  | -1.7  | 2.42E-05 | 0.000347 | ENSMUSG0000002917  | Tbc1d1      | protein_codi | 64156305 | 64351486 | inside       | 32085  | 31840  | shortestDistance |
| chr5 | 64234204 | 64234500 | 297  | 1.05  | 0.00456  | 0.0232   | ENSMUSG00000010494 | Gm43721     | TEC          | 64233930 | 64236242 | inside       | 422    | 274    | shortestDistance |
| chr5 | 64289262 | 64289616 | 355  | -0.92 | 0.0123   | 0.0496   | ENSMUSG0000002917  | Tbc1d1      | protein_codi | 64156305 | 64351486 | inside       | 133134 | 61870  | shortestDistance |
| chr5 | 64298206 | 64298881 | 676  | 2.06  | 2.31E-08 | 9.61E-07 | ENSMUSG0000002917  | Tbc1d1      | protein_codi | 64156305 | 64351486 | inside       | 142239 | 52605  | shortestDistance |
| chr5 | 64360531 | 64361158 | 628  | 1.03  | 0.00517  | 0.0255   | ENSMUSG00000010573 | Gm43838     | lincRNA      | 64360514 | 64363631 | inside       | 330    | 17     | shortestDistance |
| chr5 | 64378967 | 64379288 | 322  | 1.92  | 9.61E-06 | 0.00016  | ENSMUSG00000010544 | Gm43837     | lincRNA      | 64383454 | 64386205 | upstream     | -4326  | 4166   | shortestDistance |
| chr5 | 64599814 | 64600329 | 516  | -0.95 | 0.00863  | 0.0379   | ENSMUSG00000010540 | Gm3716      | lincRNA      | 64593857 | 64610700 | inside       | 10628  | 5957   | shortestDistance |
| chr5 | 64619776 | 64620192 | 417  | 2.22  | 2.71E-06 | 5.47E-05 | ENSMUSG00000010540 | Gm3716      | lincRNA      | 64593857 | 64610700 | upstream     | -9284  | 9076   | shortestDistance |
| chr5 | 64634772 | 64635265 | 494  | -0.99 | 0.0106   | 0.0443   | ENSMUSG00000010518 | Gm42564     | lincRNA      | 64635361 | 64637388 | downstream   | 2370   | 96     | shortestDistance |
| chr5 | 64793990 | 64794317 | 328  | 1.09  | 0.00429  | 0.0222   | ENSMUSG0000009764  | Gm20033     | processed_tr | 64708207 | 64804117 | inside       | 9963   | 9800   | shortestDistance |
| chr5 | 64922827 | 64923421 | 595  | 1.58  | 0.000128 | 0.00137  | ENSMUSG00000004482 | Tlr1        | protein_codi | 64924679 | 64933563 | downstream   | 10439  | 1258   | shortestDistance |
| chr5 | 64959976 | 64960250 | 275  | 0.94  | 0.011    | 0.0457   | ENSMUSG0000000514  | Tlr6        | protein_codi | 64952031 | 64960097 | overlapStart | -16    | 121    | shortestDistance |
| chr5 | 64960776 | 64961523 | 748  | 1.37  | 2.45E-05 | 0.000349 | ENSMUSG0000000514  | Tlr6        | protein_codi | 64952031 | 64960097 | upstream     | -1053  | 679    | shortestDistance |
| chr5 | 65038230 | 65038730 | 501  | 2.02  | 8.73E-07 | 2.10E-05 | ENSMUSG00000002918 | Fam114a1    | protein_codi | 64970071 | 65041886 | inside       | 68409  | 3156   | shortestDistance |
| chr5 | 65091308 | 65091910 | 603  | 1.58  | 0.000109 | 0.0012   | ENSMUSG00000003791 | Tmem156     | protein_codi | 65054346 | 65092132 | inside       | 523    | 222    | shortestDistance |
| chr5 | 65101543 | 65102394 | 852  | 1.27  | 0.000385 | 0.00336  | ENSMUSG00000005492 | Khlh5       | protein_codi | 65107539 | 65168188 | upstream     | -5571  | 5145   | shortestDistance |
| chr5 | 65356957 | 65357358 | 402  | 3.52  | 1.54E-09 | 9.30E-08 | ENSMUSG00000002919 | Klb         | protein_codi | 65348314 | 65384007 | inside       | 8844   | 8643   | shortestDistance |
| chr5 | 65480362 | 65480937 | 576  | 1.35  | 0.000437 | 0.00371  | ENSMUSG00000010583 | Gm43552     | protein_codi | 65427427 | 65492833 | inside       | 12183  | 11896  | shortestDistance |
| chr5 | 65483945 | 65484325 | 381  | 1.36  | 0.000159 | 0.00164  | ENSMUSG00000010583 | Gm43552     | protein_codi | 65427427 | 65492833 | inside       | 8698   | 8508   | shortestDistance |
| chr5 | 65535438 | 65535699 | 262  | 0.97  | 0.0103   | 0.0434   | ENSMUSG00000010568 | Gm42725     | TEC          | 65531568 | 65535760 | inside       | 192    | 61     | shortestDistance |
| chr5 | 65697690 | 65698793 | 1104 | 0.98  | 0.00304  | 0.017    | ENSMUSG00000002920 | Pds5a       | protein_codi | 65605721 | 65698273 | overlapStart | 31     | 520    | shortestDistance |
| chr5 | 65860597 | 65861057 | 461  | 1.3   | 0.00196  | 0.0121   | ENSMUSG00000002920 | Rho         | protein_codi | 65861213 | 65896700 | upstream     | -386   | 156    | shortestDistance |
| chr5 | 65867323 | 65868072 | 750  | 1.34  | 2.95E-05 | 0.000408 | ENSMUSG00000002920 | Rho         | protein_codi | 65861213 | 65896700 | inside       | 6485   | 6110   | shortestDistance |
| chr5 | 66138611 | 66139015 | 405  | 2.69  | 1.12E-08 | 5.17E-07 | ENSMUSG0000000782  | Rbm47       | protein_codi | 66016549 | 66173118 | inside       | 34305  | 34103  | shortestDistance |
| chr5 | 66730976 | 66731294 | 319  | -2.28 | 6.80E-07 | 1.69E-05 | ENSMUSG00000010728 | Gm434280    | TEC          | 66718370 | 66719919 | downstream   | 12765  | 11057  | shortestDistance |
| chr5 | 66816963 | 66817980 | 1018 | 0.94  | 0.00943  | 0.0406   | ENSMUSG00000003773 | Limch1      | protein_codi | 66745827 | 67057158 | inside       | 71645  | 71136  | shortestDistance |
| chr5 | 67024761 | 67025059 | 299  | -1.01 | 0.0076   | 0.0344   | ENSMUSG00000003773 | Limch1      | protein_codi | 66745827 | 67057158 | inside       | 279083 | 32099  | shortestDistance |
| chr5 | 67134717 | 67135041 | 325  | -1.29 | 0.0017   | 0.0108   | ENSMUSG00000010699 | Gm33167     | TEC          | 67127503 | 67130145 | downstream   | 7376   | 4572   | shortestDistance |
| chr5 | 67393944 | 67394405 | 462  | 1.36  | 4.79E-05 | 0.000609 | ENSMUSG00000009206 | Ben4d       | protein_codi | 67392147 | 67428310 | inside       | 34136  | 1797   | shortestDistance |
| chr5 | 67437133 | 67437929 | 797  | -0.81 | 0.00726  | 0.0332   | ENSMUSG00000009784 | Gm26756     | antisense_RI | 67427680 | 67437990 | inside       | 9851   | 61     | shortestDistance |
| chr5 | 67446638 | 67446921 | 284  | -1.15 | 0.00339  | 0.0184   | ENSMUSG00000010692 | Gm20072     | processed_p  | 67453479 | 67453770 | upstream     | -6699  | 6558   | shortestDistance |
| chr5 | 67599593 | 67600615 | 663  | -0.82 | 0.00867  | 0.0381   | ENSMUSG00000010694 | 1700025A081 | TEC          | 67607218 | 67607826 | downstream   | 7542   | 6603   | shortestDistance |
| chr5 | 67633780 | 67634308 | 529  | 1.61  | 8.98E-05 | 0.00102  | ENSMUSG00000010704 | Gm42735     | TEC          | 67633663 | 67635308 | inside       | 1264   | 117    | shortestDistance |
| chr5 | 67669346 | 67669758 | 413  | -2.37 | 1.48E-09 | 8.96E-08 | ENSMUSG00000004348 | Atp8a1      | protein_codi | 67618140 | 67847434 | inside       | 177882 | 51206  | shortestDistance |
| chr5 | 67670130 | 67670605 | 476  | -1.05 | 0.0023   | 0.0137   | ENSMUSG00000003768 | Atp8a1      | protein_codi | 67618140 | 67847434 | inside       | 177066 | 51990  | shortestDistance |
| chr5 | 67733566 | 67734210 | 645  | -1    | 0.00467  | 0.0236   | ENSMUSG00000003768 | Atp8a1      | protein_codi | 67618140 | 67847434 | inside       | 113546 | 113224 | shortestDistance |
| chr5 | 67778026 | 67778397 | 372  | -1.01 | 0.00607  | 0.0289   | ENSMUSG00000003768 | Atp8a1      | protein_codi | 67618140 | 67847434 | inside       | 69222  | 69037  | shortestDistance |
| chr5 | 67823546 | 67824126 | 581  | 2.62  | 1.93E-08 | 8.23E-07 | ENSMUSG00000003768 | Atp8a1      | protein_codi | 67618140 | 67847434 | inside       | 23598  | 23308  | shortestDistance |
| chr5 | 67863875 | 67864755 | 881  | -0.88 | 0.00935  | 0.0403   | ENSMUSG00000008768 | Gm15477     | antisense_RI | 67847065 | 67909013 | inside       | 17250  | 16810  | shortestDistance |
| chr5 | 67942951 | 67943622 | 672  | -1.28 | 0.000283 | 0.00262  | ENSMUSG00000010626 | 4930425K10f | antisense_RI | 67933610 | 67943083 | overlapStart | -203   | 132    | shortestDistance |
| chr5 | 67961906 | 67962322 | 417  | 1.1   | 0.0057   | 0.0275   | ENSMUSG00000009471 | Gm5108      | protein_codi | 67941669 | 67977070 | inside       | 20445  | 14748  | shortestDistance |
| chr5 | 68049530 | 68050029 | 500  | 1.38  | 0.000295 | 0.0027   | ENSMUSG00000006808 | Gxrcr1      | protein_codi | 68031835 | 68166398 | inside       | 17945  | 17695  | shortestDistance |
| chr5 | 68165839 | 68166339 | 501  | 1.34  | 0.000275 | 0.00256  | ENSMUSG00000006808 | Gxrcr1      | protein_codi | 68031835 | 68166398 | inside       | 134254 | 59     | shortestDistance |
| chr5 | 69464522 | 69464809 | 288  | -1.55 | 0.00027  | 0.00251  | ENSMUSG00000004348 | Gm5867      | processed_p  | 69461152 | 69461743 | downstream   | 3514   | 2779   | shortestDistance |
| chr5 | 69521412 | 69521619 | 208  | -1.14 | 0.0026   | 0.0151   | ENSMUSG00000002915 | Vipf7       | protein_codi | 69516671 | 69542648 | inside       | 21132  | 4741   | shortestDistance |
| chr5 | 69522073 | 69522465 | 393  | -1.35 | 0.000129 | 0.00138  | ENSMUSG00000002915 | Vipf7       | protein_codi | 69516671 | 69542648 | inside       | 20379  | 5402   | shortestDistance |
| chr5 | 69591704 | 69592611 | 908  | -0.97 | 0.000844 | 0.00624  | ENSMUSG00000002920 | Gnpd2a      | protein_codi | 69573108 | 69592340 | overlapStart | 182    | 271    | shortestDistance |
| chr5 | 69601061 | 69601365 | 305  | -0.93 | 0.0122   | 0.0494   | ENSMUSG00000002920 | Gnpd2a      | protein_codi | 69573108 | 69592340 | upstream     | -8873  | 8721   | shortestDistance |
| chr5 | 71095695 | 71096428 | 734  | -1.03 | 0.00349  | 0.0189   | ENSMUSG00000000056 | Gabra2      | protein_codi | 70957597 | 71095849 | overlapStart | -213   | 154    | shortestDistance |
| chr5 | 71657367 | 71658545 | 1179 | -1.04 | 0.0026   | 0.0151   | ENSMUSG00000002921 | Gabra4      | protein_codi | 71569749 | 71658308 | overlapStart | 352    | 237    | shortestDistance |
| chr5 | 71700395 | 71701519 | 1125 | -1.44 | 0.000124 | 0.00133  | ENSMUSG00000002921 | Gabrb1      | protein_codi | 71658113 | 72149037 | inside       | 42884  | 42282  | shortestDistance |
| chr5 | 72122491 | 72123077 | 587  | -1.04 | 0.0025   | 0.0146   | ENSMUSG00000002921 | Gabrb1      | protein_codi | 71658113 | 72149037 | inside       | 464671 | 25960  | shortestDistance |
| chr5 | 72222947 | 72223269 | 323  | 2.26  | 3.37E-07 | 9.39E-06 | ENSMUSG00000004680 | Atp10d      | polymorphic  | 72203329 | 72298775 | inside       | 19779  | 19618  | shortestDistance |
| chr5 | 72251891 | 72262345 | 455  | 2.05  | 5.19E-07 | 1.35E-05 | ENSMUSG00000004680 | Atp10d      | polymorphic  | 72203329 | 72298775 | inside       | 58789  | 36430  | shortestDistance |
| chr5 | 72350126 | 72350675 | 550  | -0.95 | 0.00416  | 0.0216   | ENSMUSG00000009340 | Gm20647     | antisense_RI | 72316354 | 72368048 | inside       | 34046  | 17373  | shortestDistance |
| chr5 | 72509747 | 72510117 | 371  | -2.31 | 1.23E-05 | 0.000197 | ENSMUSG00000007288 | Nfx1        | protein_codi | 72513301 | 72559684 | downstream   | 49752  | 3184   | shortestDistance |
| chr5 | 72723364 | 72723781 | 418  | 1.79  | 1.00E-04 | 0.00111  | ENSMUSG00000005485 | Txk         | protein_codi | 72695978 | 72752777 | inside       | 29205  | 27386  | shortestDistance |
| chr5 | 72752692 | 72753019 | 328  | -1.29 | 0.000759 | 0.00574  | ENSMUSG00000005485 | Txk         | protein_codi | 72695978 | 72752777 | overlapStart | -79    | 85     | shortestDistance |
| chr5 | 72829710 | 72830032 | 323  | 1.01  | 0.011    | 0.0457   | ENSMUSG00000002921 | Tec         | protein_codi | 72755716 | 72868483 | inside       | 38612  | 38451  | shortestDistance |
| chr5 | 72831088 | 72831314 | 227  | 2.01  | 4.20E-05 | 0.000547 | ENSMUSG00000002921 | Tec         | protein_codi | 72755716 | 72868483 | inside       | 37282  | 37169  | shortestDistance |
| chr5 | 72832672 | 72833457 | 786  | 1.26  | 0.000308 | 0.0028   | ENSMUSG00000002921 | Tec         | protein_codi | 72755716 | 72868483 | inside       | 35419  | 35026  | shortestDistance |
| chr5 | 72851596 | 72852448 | 853  | 0.95  | 0.00369  | 0.0197   | ENSMUSG00000002921 | Tec         | protein_codi | 72755716 | 72868483 | inside       | 16461  | 16035  | shortestDistance |
| chr5 | 72854587 | 72854873 | 287  | 1.29  | 0.00077  | 0.0058   | ENSMUSG00000002921 | Tec         | protein_codi | 72755716 | 72868483 | inside       | 13753  | 13610  | shortestDistance |
| chr5 | 72861671 | 72862389 | 719  | 0.89  | 0.00777  | 0.035    | ENSMUSG00000002921 | Tec         | protein_codi | 72755716 |          |              |        |        |                  |

|      |          |          |      |       |          |          |                    |            |               |          |          |              |         |        |                  |
|------|----------|----------|------|-------|----------|----------|--------------------|------------|---------------|----------|----------|--------------|---------|--------|------------------|
| chr5 | 80876645 | 80877176 | 532  | -1.34 | 0.000278 | 0.00258  | ENSMUSG0000006523  | Gm22974    | snRNA         | 80893654 | 80893756 | upstream     | -16744  | 16478  | shortestDistance |
| chr5 | 81019500 | 81020580 | 1081 | -0.95 | 0.00235  | 0.014    | ENSMUSG0000003760  | Adgrl3     | protein_codi  | 81020138 | 81825133 | overlapStart | -98     | 442    | shortestDistance |
| chr5 | 81058096 | 81058532 | 437  | 1.77  | 3.14E-06 | 6.19E-05 | ENSMUSG0000003760  | Adgrl3     | protein_codi  | 81020138 | 81825133 | inside       | 38176   | 37958  | shortestDistance |
| chr5 | 81067932 | 81068588 | 657  | -1.49 | 0.000165 | 0.00169  | ENSMUSG0000003760  | Adgrl3     | protein_codi  | 81020138 | 81825133 | inside       | 48122   | 47794  | shortestDistance |
| chr5 | 81225488 | 81225828 | 341  | -2.64 | 1.34E-07 | 4.26E-06 | ENSMUSG0000003760  | Adgrl3     | protein_codi  | 81020138 | 81825133 | inside       | 20520   | 20530  | shortestDistance |
| chr5 | 82346707 | 82347039 | 333  | -1.83 | 6.00E-05 | 0.000737 | ENSMUSG0000010692  | Rpl7-ps7   | processed_g   | 82336851 | 82337649 | downstream   | 10022   | 9058   | shortestDistance |
| chr5 | 82356574 | 82356847 | 274  | -4.15 | 4.00E-13 | 8.62E-11 | ENSMUSG0000010692  | Rpl7-ps7   | processed_g   | 82336851 | 82337649 | downstream   | 19859   | 18925  | shortestDistance |
| chr5 | 83483993 | 83484490 | 498  | -1.92 | 2.59E-07 | 7.51E-06 | ENSMUSG0000010453  | Gm44303    | miRNA         | 83464794 | 83464876 | downstream   | 19448   | 19117  | shortestDistance |
| chr5 | 83650770 | 83651176 | 407  | -1.58 | 0.00037  | 0.00325  | ENSMUSG0000000728  | Gm25765    | snoRNA        | 83648823 | 83648954 | upstream     | -2019   | 1816   | shortestDistance |
| chr5 | 84153086 | 84153452 | 367  | -2.27 | 2.81E-08 | 1.14E-06 | ENSMUSG00000002924 | Epha5      | protein_codi  | 84054761 | 84417382 | inside       | 264113  | 98325  | shortestDistance |
| chr5 | 84415935 | 84416635 | 701  | -1.36 | 0.00057  | 0.00458  | ENSMUSG00000002924 | Epha5      | protein_codi  | 84054761 | 84417382 | inside       | 1097    | 747    | shortestDistance |
| chr5 | 84416776 | 84417847 | 1072 | -1.4  | 1.83E-05 | 0.000274 | ENSMUSG00000002924 | Epha5      | protein_codi  | 84054761 | 84417382 | overlapStart | 70      | 465    | shortestDistance |
| chr5 | 84480884 | 84481390 | 507  | -2.08 | 5.90E-08 | 2.13E-06 | ENSMUSG0000010659  | Gm43532    | lincRNA       | 84428805 | 84432620 | downstream   | 52332   | 48264  | shortestDistance |
| chr5 | 84608530 | 84609099 | 570  | -2.29 | 4.39E-07 | 1.17E-05 | ENSMUSG0000010565  | Gm43531    | processed_g   | 84618706 | 84619819 | upstream     | -9892   | 9607   | shortestDistance |
| chr5 | 84616861 | 84617142 | 282  | -1.6  | 0.004    | 0.021    | ENSMUSG0000010565  | Gm43531    | processed_g   | 84618706 | 84619819 | upstream     | -1704   | 1564   | shortestDistance |
| chr5 | 85155063 | 85155732 | 670  | -1.83 | 1.16E-05 | 0.000187 | ENSMUSG0000010638  | Gm21006    | processed_g   | 84866179 | 84866845 | upstream     | -288553 | 288218 | shortestDistance |
| chr5 | 85155803 | 85156347 | 545  | -2.18 | 1.91E-06 | 4.05E-05 | ENSMUSG0000010638  | Gm21006    | processed_g   | 84866179 | 84866845 | upstream     | -289230 | 288958 | shortestDistance |
| chr5 | 85579503 | 85579820 | 318  | -2.07 | 5.54E-06 | 1.00E-04 | ENSMUSG0000000655  | Gm24626    | snRNA         | 85829627 | 85829787 | upstream     | -31965  | 31807  | shortestDistance |
| chr5 | 85946011 | 85948773 | 273  | -1.16 | 0.00882  | 0.0386   | ENSMUSG0000010422  | Gm43564    | processed_g   | 86005407 | 86005617 | downstream   | 10880   | 10534  | shortestDistance |
| chr5 | 86078596 | 86079240 | 645  | 1.25  | 0.000495 | 0.00409  | ENSMUSG00000002925 | Stap1      | protein_codi  | 86071746 | 86106125 | inside       | 7172    | 6850   | shortestDistance |
| chr5 | 86118246 | 86119103 | 858  | -1.51 | 8.91E-06 | 0.00015  | ENSMUSG00000003589 | Uba6       | protein_codi  | 86109287 | 86172803 | inside       | 54129   | 8959   | shortestDistance |
| chr5 | 86244863 | 86245242 | 380  | -1.34 | 0.000364 | 0.00321  | ENSMUSG00000006118 | Tmprss11c  | protein_codi  | 86231481 | 86289308 | inside       | 44256   | 13382  | shortestDistance |
| chr5 | 86318410 | 86318838 | 429  | -1.46 | 0.0015   | 0.00979  | ENSMUSG00000006125 | Tmprss11d  | protein_codi  | 86302217 | 86373420 | inside       | 54796   | 16193  | shortestDistance |
| chr5 | 86352930 | 86353334 | 405  | -1.08 | 0.00234  | 0.0139   | ENSMUSG00000006125 | Tmprss11d  | protein_codi  | 86302217 | 86373420 | inside       | 20288   | 20086  | shortestDistance |
| chr5 | 86419568 | 86419837 | 270  | -1.56 | 0.00028  | 0.00259  | ENSMUSG0000000728  | Tmprss11a  | protein_codi  | 86410410 | 86468990 | inside       | 49288   | 9158   | shortestDistance |
| chr5 | 86684724 | 86685018 | 295  | -1.12 | 0.0037   | 0.0197   | ENSMUSG0000010650  | Gm43056    | lincRNA       | 86683850 | 86686640 | inside       | 1769    | 874    | shortestDistance |
| chr5 | 86792254 | 86792738 | 485  | -1.99 | 9.56E-07 | 2.26E-05 | ENSMUSG0000010570  | Gm43055    | lincRNA       | 86728906 | 86817106 | inside       | 63590   | 24368  | shortestDistance |
| chr5 | 86792793 | 86793368 | 576  | -1.32 | 4.48E-05 | 0.000578 | ENSMUSG0000010570  | Gm43055    | lincRNA       | 86728906 | 86817106 | inside       | 64174   | 23738  | shortestDistance |
| chr5 | 86850139 | 86850443 | 305  | -1.06 | 0.00411  | 0.0214   | ENSMUSG0000010530  | Gm21461    | unprocessed   | 86860657 | 86863506 | downstream   | 13215   | 10214  | shortestDistance |
| chr5 | 87337078 | 87339391 | 224  | -1.08 | 0.0114   | 0.0469   | ENSMUSG00000003578 | Ugt2a3     | protein_codi  | 87324972 | 87337195 | inside       | 3375    | 3264   | shortestDistance |
| chr5 | 87547222 | 87547673 | 452  | -2.26 | 2.35E-08 | 9.74E-07 | ENSMUSG00000002927 | Sult1d1    | protein_codi  | 87554645 | 87569027 | downstream   | 21579   | 6972   | shortestDistance |
| chr5 | 88392078 | 88392352 | 275  | -1.03 | 0.0112   | 0.0462   | ENSMUSG00000002928 | Amtn       | protein_codi  | 88376108 | 88385916 | downstream   | 16107   | 6162   | shortestDistance |
| chr5 | 88399821 | 88400320 | 500  | -1.04 | 0.00163  | 0.0105   | ENSMUSG00000002928 | Amtn       | protein_codi  | 88376108 | 88385916 | downstream   | 23962   | 13905  | shortestDistance |
| chr5 | 88499736 | 88500207 | 472  | -1.39 | 0.00048  | 0.004    | ENSMUSG00000002928 | Enam       | protein_codi  | 88487975 | 88506049 | inside       | 11997   | 5842   | shortestDistance |
| chr5 | 88586609 | 88587183 | 575  | -1.09 | 0.00268  | 0.0154   | ENSMUSG00000002929 | Rufy3      | protein_codi  | 88565040 | 88651392 | inside       | 21856   | 21569  | shortestDistance |
| chr5 | 88587529 | 88587883 | 355  | -1.9  | 1.79E-05 | 0.000269 | ENSMUSG00000002929 | Rufy3      | protein_codi  | 88565040 | 88651392 | inside       | 22666   | 22489  | shortestDistance |
| chr5 | 88678910 | 88679230 | 321  | -2.44 | 1.10E-09 | 7.02E-08 | ENSMUSG00000004422 | Grsf1      | protein_codi  | 88659448 | 88676171 | upstream     | -2899   | 2739   | shortestDistance |
| chr5 | 88887454 | 88887959 | 506  | -1    | 0.00367  | 0.0196   | ENSMUSG00000006096 | Slc4a4     | protein_codi  | 88886818 | 89239653 | inside       | 888     | 636    | shortestDistance |
| chr5 | 88928203 | 88928880 | 678  | -1.09 | 0.00618  | 0.0293   | ENSMUSG00000006096 | Slc4a4     | protein_codi  | 88886818 | 89239653 | inside       | 41724   | 41385  | shortestDistance |
| chr5 | 88961355 | 88961964 | 610  | -1.34 | 0.000753 | 0.0057   | ENSMUSG00000006096 | Slc4a4     | protein_codi  | 88886818 | 89239653 | inside       | 74842   | 74537  | shortestDistance |
| chr5 | 88971622 | 88971852 | 231  | -1.63 | 0.000193 | 0.00192  | ENSMUSG00000006096 | Slc4a4     | protein_codi  | 88886818 | 89239653 | inside       | 84919   | 84804  | shortestDistance |
| chr5 | 89221680 | 89222025 | 346  | -1.77 | 4.63E-07 | 1.23E-05 | ENSMUSG00000006096 | Slc4a4     | protein_codi  | 88886818 | 89239653 | inside       | 335034  | 17628  | shortestDistance |
| chr5 | 89551185 | 89551477 | 293  | -1.53 | 0.000137 | 0.00145  | ENSMUSG00000003552 | Npffr2     | protein_codi  | 89527429 | 89583740 | inside       | 23902   | 23756  | shortestDistance |
| chr5 | 89751948 | 89752225 | 278  | -1.81 | 0.00205  | 0.0126   | ENSMUSG00000004363 | Adamt3     | protein_codi  | 89677087 | 89883334 | inside       | 131248  | 74861  | shortestDistance |
| chr5 | 89844282 | 89844909 | 628  | -1.19 | 7.29E-05 | 0.000861 | ENSMUSG00000004363 | Adamt3     | protein_codi  | 89677087 | 89883334 | inside       | 38738   | 38425  | shortestDistance |
| chr5 | 89896925 | 89897328 | 404  | -1.14 | 0.00137  | 0.00917  | ENSMUSG00000004363 | Adamt3     | protein_codi  | 89677087 | 89883334 | upstream     | -13792  | 13591  | shortestDistance |
| chr5 | 90149857 | 90150757 | 901  | -1.08 | 0.00167  | 0.0107   | ENSMUSG00000004363 | Eif5a13-ps | processed_g   | 90132229 | 90132675 | downstream   | 18078   | 17182  | shortestDistance |
| chr5 | 90504665 | 90505142 | 478  | -1.11 | 0.00179  | 0.0113   | ENSMUSG0000010678  | Gm43449    | antisense_RI  | 90499088 | 90515931 | inside       | 11027   | 5577   | shortestDistance |
| chr5 | 90608816 | 90609128 | 313  | -2.46 | 2.55E-07 | 7.41E-06 | ENSMUSG00000002937 | Rassf6     | protein_codi  | 90603076 | 90640657 | inside       | 31685   | 5740   | shortestDistance |
| chr5 | 90612021 | 90612775 | 755  | 1.21  | 0.000125 | 0.00134  | ENSMUSG00000002937 | Rassf6     | protein_codi  | 90603076 | 90640657 | inside       | 28259   | 8945   | shortestDistance |
| chr5 | 90617842 | 90618262 | 421  | 1.94  | 3.33E-06 | 6.50E-05 | ENSMUSG00000002937 | Rassf6     | protein_codi  | 90603076 | 90640657 | inside       | 22605   | 14766  | shortestDistance |
| chr5 | 90640180 | 90640889 | 710  | -0.96 | 0.00828  | 0.0368   | ENSMUSG00000002937 | Rassf6     | protein_codi  | 90603076 | 90640657 | overlapStart | 123     | 232    | shortestDistance |
| chr5 | 90654910 | 90655243 | 334  | 1.73  | 0.000193 | 0.00192  | ENSMUSG00000002937 | Rassf6     | protein_codi  | 90603076 | 90640657 | upstream     | -14419  | 14253  | shortestDistance |
| chr5 | 90660615 | 9066584  | 570  | 1.08  | 0.00844  | 0.0373   | ENSMUSG0000010707  | Gm43090    | processed_g   | 90750525 | 90750838 | upstream     | -54225  | 53941  | shortestDistance |
| chr5 | 90731521 | 90731854 | 334  | -1.52 | 0.000124 | 0.00133  | ENSMUSG0000010707  | Gm43090    | processed_g   | 90750525 | 90750838 | upstream     | -18837  | 18671  | shortestDistance |
| chr5 | 90758177 | 90758528 | 352  | -1.6  | 0.00036  | 0.00318  | ENSMUSG00000002937 | Cxcl5      | protein_codi  | 90759360 | 90761624 | upstream     | -1008   | 832    | shortestDistance |
| chr5 | 90881677 | 90882088 | 412  | -1.1  | 0.00484  | 0.0243   | ENSMUSG00000002938 | Cxcl1      | protein_codi  | 90891241 | 90893115 | upstream     | -9359   | 9153   | shortestDistance |
| chr5 | 90900145 | 90900594 | 450  | -1.12 | 0.00242  | 0.0143   | ENSMUSG00000005842 | Cxcl2      | protein_codi  | 90903871 | 90905938 | upstream     | -3501   | 3277   | shortestDistance |
| chr5 | 90964763 | 90965144 | 382  | 1.99  | 6.42E-07 | 1.61E-05 | ENSMUSG00000002937 | Mthfd2l    | protein_codi  | 90931117 | 91021368 | inside       | 33837   | 33646  | shortestDistance |
| chr5 | 91035373 | 91035771 | 399  | 2.67  | 2.63E-09 | 1.47E-07 | ENSMUSG00000003502 | Epgn       | protein_codi  | 91027464 | 91035215 | downstream   | 8108    | 158    | shortestDistance |
| chr5 | 91036642 | 91036992 | 351  | 2.8   | 5.19E-10 | 3.68E-08 | ENSMUSG00000003502 | Epgn       | protein_codi  | 91027464 | 91035215 | downstream   | 9353    | 1427   | shortestDistance |
| chr5 | 91139022 | 91140097 | 1076 | -0.92 | 0.0114   | 0.0469   | ENSMUSG00000002937 | Areg       | protein_codi  | 91139599 | 91148432 | overlapStart | -39     | 498    | shortestDistance |
| chr5 | 91402253 | 91403260 | 1008 | -0.9  | 0.00405  | 0.0212   | ENSMUSG00000002938 | Btc        | protein_codi  | 91357261 | 91402994 | overlapStart | 238     | 266    | shortestDistance |
| chr5 | 91517914 | 91518724 | 811  | -1.16 | 0.000986 | 0.00706  | ENSMUSG00000003498 | Parm1      | protein_codi  | 91517615 | 91626894 | inside       | 704     | 299    | shortestDistance |
| chr5 | 91600973 | 91610914 | 942  | -1.45 | 0.000223 | 0.00216  | ENSMUSG00000003498 | Parm1      | protein_codi  | 91517615 | 91626894 | inside       | 92829   | 15980  | shortestDistance |
| chr5 | 91610954 | 91611549 | 596  | 1.44  | 4.95E-05 | 0.000626 | ENSMUSG00000003498 | Parm1      | protein_codi  | 91517615 | 91626894 | inside       | 93637   | 15345  | shortestDistance |
| chr5 | 91629247 | 91629907 | 661  | -1.21 | 0.000422 | 0.00362  | ENSMUSG00000003498 | Parm1      | protein_codi  | 91517615 | 91626894 | downstream   | 111962  | 2353   | shortestDistance |
| chr5 | 91961422 | 91961701 | 280  | 0.99  | 0.0048   | 0.0241   | ENSMUSG00000002939 | Rchyl1     | protein_codi  | 91948904 | 91963068 | inside       | 1506    | 1367   | shortestDistance |
| chr5 | 91974012 | 91974354 | 343  | 1.56  | 0.000126 | 0.00134  | ENSMUSG0000010264  | Thap6      | transcribed_1 | 91962389 | 91972066 | downstream   | 11794   | 1946   | shortestDistance |
| chr5 | 92270484 | 92271003 | 520  | 2.73  | 4.73E-09 | 2.42E-07 | ENSMUSG00000002941 | Naa4       | protein_codi  | 92257659 | 92278170 | inside       | 7426    | 7167   | shortestDistance |
| chr5 | 92318634 | 92319012 | 379  | 4.9   | 2.77E-16 | 2.29E-13 | ENSMUSG0000        |            |               |          |          |              |         |        |                  |

|      |           |           |      |       |          |          |                   |            |              |           |           |              |        |        |                  |
|------|-----------|-----------|------|-------|----------|----------|-------------------|------------|--------------|-----------|-----------|--------------|--------|--------|------------------|
| chr5 | 97132708  | 97133026  | 319  | -1.5  | 0.00122  | 0.00836  | ENSMUSG0000010473 | Gm33609    | lincRNA      | 97143026  | 97149848  | upstream     | -10159 | 10000  | shortestDistance |
| chr5 | 97330114  | 97330362  | 249  | -1.27 | 0.00637  | 0.03     | ENSMUSG0000010471 | Gm33969    | lincRNA      | 97325904  | 97348439  | inside       | 4334   | 4210   | shortestDistance |
| chr5 | 97364076  | 97365088  | 1013 | -0.89 | 0.00313  | 0.0174   | ENSMUSG0000010471 | Gm33969    | lincRNA      | 97325904  | 97348439  | downstream   | 38678  | 15637  | shortestDistance |
| chr5 | 97417203  | 97417527  | 325  | -1.14 | 0.00261  | 0.0151   | ENSMUSG0000009751 | A930467D21 | lincRNA      | 97392417  | 97642179  | inside       | 24948  | 24786  | shortestDistance |
| chr5 | 97807050  | 97807666  | 617  | -0.88 | 0.00744  | 0.0339   | ENSMUSG0000002933 | Antrx2     | protein_codi | 97882783  | 98031043  | downstream   | 223685 | 75117  | shortestDistance |
| chr5 | 97885461  | 97885843  | 383  | -1.61 | 4.39E-06 | 8.23E-05 | ENSMUSG0000002933 | Antrx2     | protein_codi | 97882783  | 98031043  | inside       | 145391 | 2678   | shortestDistance |
| chr5 | 97935468  | 97935823  | 356  | -1.1  | 0.0103   | 0.0434   | ENSMUSG0000002933 | Antrx2     | protein_codi | 97882783  | 98031043  | inside       | 95397  | 52685  | shortestDistance |
| chr5 | 97957527  | 97957918  | 392  | 2     | 2.31E-07 | 6.80E-06 | ENSMUSG0000002933 | Antrx2     | protein_codi | 97882783  | 98031043  | inside       | 73321  | 73125  | shortestDistance |
| chr5 | 97959664  | 97960015  | 352  | 2.34  | 2.12E-09 | 1.23E-07 | ENSMUSG0000002933 | Antrx2     | protein_codi | 97882783  | 98031043  | inside       | 71203  | 71028  | shortestDistance |
| chr5 | 97961844  | 97962186  | 343  | 2.91  | 2.40E-11 | 2.78E-09 | ENSMUSG0000002933 | Antrx2     | protein_codi | 97882783  | 98031043  | inside       | 69028  | 68857  | shortestDistance |
| chr5 | 97964508  | 97964783  | 276  | 1.62  | 4.55E-05 | 0.000585 | ENSMUSG0000002933 | Antrx2     | protein_codi | 97882783  | 98031043  | inside       | 66397  | 66260  | shortestDistance |
| chr5 | 97966840  | 97967120  | 281  | 1.58  | 0.000789 | 0.00591  | ENSMUSG0000002933 | Antrx2     | protein_codi | 97882783  | 98031043  | inside       | 64063  | 63923  | shortestDistance |
| chr5 | 98055362  | 98055608  | 247  | 2.57  | 1.10E-05 | 0.000179 | ENSMUSG0000010511 | Gm42760    | processed_p  | 98056793  | 98057103  | upstream     | -1308  | 1185   | shortestDistance |
| chr5 | 98172559  | 98173084  | 526  | -1.55 | 2.74E-05 | 0.000383 | ENSMUSG0000003545 | Pdm8       | protein_codi | 98167198  | 98188991  | inside       | 5624   | 5361   | shortestDistance |
| chr5 | 98198854  | 98198854  | 1001 | -0.96 | 0.0113   | 0.0467   | ENSMUSG0000003545 | Pdm8       | protein_codi | 98167198  | 98188991  | downstream   | 32156  | 9863   | shortestDistance |
| chr5 | 98253841  | 98254962  | 1122 | -1.22 | 0.00228  | 0.0136   | ENSMUSG0000002933 | Gf5        | protein_codi | 98254184  | 98277030  | overlapStart | 218    | 343    | shortestDistance |
| chr5 | 98368844  | 98369090  | 247  | -1.42 | 0.000713 | 0.00546  | ENSMUSG0000005781 | 1700007G11 | protein_codi | 98329304  | 98802047  | inside       | 39663  | 39540  | shortestDistance |
| chr5 | 98568861  | 98569508  | 648  | -1.34 | 0.00936  | 0.0404   | ENSMUSG0000005781 | 1700007G11 | protein_codi | 98329304  | 98802047  | inside       | 239880 | 232539 | shortestDistance |
| chr5 | 98585818  | 98586355  | 538  | -1.13 | 0.00806  | 0.036    | ENSMUSG0000005781 | 1700007G11 | protein_codi | 98329304  | 98802047  | inside       | 256782 | 215692 | shortestDistance |
| chr5 | 98865099  | 98865538  | 440  | 1.15  | 0.00353  | 0.019    | ENSMUSG0000002933 | Bmp3       | protein_codi | 98854415  | 98884396  | inside       | 10903  | 10684  | shortestDistance |
| chr5 | 99214371  | 99214972  | 602  | 1.7   | 9.43E-06 | 0.000157 | ENSMUSG0000008980 | Rasgef1b   | protein_codi | 99217426  | 99729065  | downstream   | 514393 | 2454   | shortestDistance |
| chr5 | 99266355  | 99266680  | 326  | 1.11  | 0.00113  | 0.00789  | ENSMUSG0000008980 | Rasgef1b   | protein_codi | 99217426  | 99729065  | inside       | 462547 | 48929  | shortestDistance |
| chr5 | 99283642  | 99283990  | 349  | 4.56  | 2.00E-16 | 1.80E-13 | ENSMUSG0000008980 | Rasgef1b   | protein_codi | 99217426  | 99729065  | inside       | 445249 | 66216  | shortestDistance |
| chr5 | 99284379  | 99284677  | 299  | 2.83  | 1.08E-07 | 3.55E-06 | ENSMUSG0000008980 | Rasgef1b   | protein_codi | 99217426  | 99729065  | inside       | 444537 | 66953  | shortestDistance |
| chr5 | 99327050  | 99327526  | 477  | 1.59  | 6.12E-05 | 0.000748 | ENSMUSG0000008980 | Rasgef1b   | protein_codi | 99217426  | 99729065  | inside       | 401777 | 109624 | shortestDistance |
| chr5 | 99375642  | 99376162  | 521  | 1.03  | 0.00362  | 0.0194   | ENSMUSG0000008980 | Rasgef1b   | protein_codi | 99217426  | 99729065  | inside       | 353163 | 158216 | shortestDistance |
| chr5 | 99381638  | 99381932  | 295  | 2.27  | 9.59E-06 | 0.000159 | ENSMUSG0000008980 | Rasgef1b   | protein_codi | 99217426  | 99729065  | inside       | 347280 | 164212 | shortestDistance |
| chr5 | 99502717  | 99503076  | 360  | 1.21  | 0.00629  | 0.0297   | ENSMUSG0000008980 | Rasgef1b   | protein_codi | 99217426  | 99729065  | inside       | 226169 | 225989 | shortestDistance |
| chr5 | 99636584  | 99636958  | 375  | -1.42 | 0.00234  | 0.0139   | ENSMUSG0000008980 | Rasgef1b   | protein_codi | 99217426  | 99729065  | inside       | 92294  | 92107  | shortestDistance |
| chr5 | 99978045  | 99978314  | 270  | 1.08  | 0.00284  | 0.0161   | ENSMUSG0000009162 | Gm17092    | antisense_RI | 99977686  | 99978858  | inside       | 494    | 359    | shortestDistance |
| chr5 | 100227887 | 100228312 | 426  | -1.11 | 0.00648  | 0.0304   | ENSMUSG0000008591 | Gm8091     | unprocessed  | 100220440 | 100355119 | inside       | 127019 | 7447   | shortestDistance |
| chr5 | 100349613 | 100349918 | 306  | 1.21  | 0.0116   | 0.0474   | ENSMUSG0000008591 | Gm8091     | unprocessed  | 100220440 | 100355119 | inside       | 5353   | 5201   | shortestDistance |
| chr5 | 100466564 | 100467174 | 611  | 2.01  | 6.29E-09 | 3.13E-07 | ENSMUSG0000003531 | Lin5a      | protein_codi | 100441918 | 100500639 | inside       | 33770  | 24646  | shortestDistance |
| chr5 | 100500513 | 100501004 | 492  | 0.87  | 0.00753  | 0.0342   | ENSMUSG0000003531 | Lin5a      | protein_codi | 100441918 | 100500639 | overlapStart | -119   | 126    | shortestDistance |
| chr5 | 100509116 | 100509774 | 660  | 1.14  | 0.00265  | 0.0153   | ENSMUSG0000010518 | Gm19620    | processed_p  | 100513187 | 100513620 | downstream   | 4176   | 3413   | shortestDistance |
| chr5 | 100569282 | 100569833 | 552  | 1.03  | 0.00785  | 0.0353   | ENSMUSG0000002932 | Plac8      | protein_codi | 100553725 | 100572245 | inside       | 2687   | 2412   | shortestDistance |
| chr5 | 100571840 | 100572440 | 601  | 0.87  | 0.00229  | 0.0401   | ENSMUSG0000002932 | Plac8      | protein_codi | 100553725 | 100572245 | overlapStart | 105    | 195    | shortestDistance |
| chr5 | 100582410 | 100582804 | 395  | 1.25  | 0.0012   | 0.00825  | ENSMUSG0000010499 | Gm43510    | processed_p  | 100592404 | 100592756 | downstream   | 10149  | 9600   | shortestDistance |
| chr5 | 100607839 | 100608250 | 412  | 2.04  | 0.000191 | 0.0019   | ENSMUSG0000010499 | Gm43510    | processed_p  | 100592404 | 100592756 | upstream     | -15288 | 15083  | shortestDistance |
| chr5 | 100613954 | 100614760 | 807  | 1.91  | 4.10E-06 | 7.74E-05 | ENSMUSG0000010499 | Gm43510    | processed_p  | 100592404 | 100592756 | upstream     | -21601 | 21198  | shortestDistance |
| chr5 | 100632691 | 100633160 | 470  | 2.37  | 3.01E-08 | 1.20E-06 | ENSMUSG0000002931 | Coq2       | protein_codi | 100654723 | 100675140 | downstream   | 42214  | 21563  | shortestDistance |
| chr5 | 100635030 | 100635416 | 387  | 1.2   | 0.000971 | 0.00697  | ENSMUSG0000002931 | Coq2       | protein_codi | 100654723 | 100675140 | downstream   | 39917  | 19307  | shortestDistance |
| chr5 | 100656214 | 100656965 | 752  | 1.46  | 5.47E-05 | 0.00068  | ENSMUSG0000002931 | Coq2       | protein_codi | 100654723 | 100675140 | inside       | 18550  | 1491   | shortestDistance |
| chr5 | 100697445 | 100697813 | 369  | 1.74  | 0.000136 | 0.00144  | ENSMUSG0000003527 | Hspse      | protein_codi | 100679484 | 100719716 | inside       | 22087  | 17961  | shortestDistance |
| chr5 | 100697939 | 100698311 | 373  | 2     | 1.18E-05 | 0.00019  | ENSMUSG0000003527 | Hspse      | protein_codi | 100679484 | 100719716 | inside       | 21591  | 18455  | shortestDistance |
| chr5 | 100709074 | 100709460 | 387  | 2.17  | 1.37E-06 | 3.06E-05 | ENSMUSG0000003527 | Hspse      | protein_codi | 100679484 | 100719716 | inside       | 10449  | 10256  | shortestDistance |
| chr5 | 100821452 | 100821809 | 358  | 1.57  | 3.98E-05 | 0.000523 | ENSMUSG0000002931 | Abraxa1    | protein_codi | 100805192 | 100820965 | upstream     | -665   | 487    | shortestDistance |
| chr5 | 100860563 | 100861142 | 580  | 3.62  | 1.69E-17 | 2.74E-14 | ENSMUSG0000002931 | Gpa3       | protein_codi | 100845713 | 100899102 | inside       | 15139  | 14850  | shortestDistance |
| chr5 | 100912274 | 100913048 | 775  | -1.06 | 0.00103  | 0.00732  | ENSMUSG0000010625 | Gm36793    | lincRNA      | 100910001 | 100913707 | inside       | 1046   | 659    | shortestDistance |
| chr5 | 100916439 | 100916825 | 333  | 2.14  | 1.87E-07 | 5.69E-06 | ENSMUSG0000010625 | Gm36793    | lincRNA      | 100910001 | 100913707 | upstream     | -2952  | 2786   | shortestDistance |
| chr5 | 100917416 | 100917721 | 306  | 0.95  | 0.00881  | 0.0385   | ENSMUSG0000010625 | Gm36793    | lincRNA      | 100910001 | 100913707 | upstream     | -3861  | 3709   | shortestDistance |
| chr5 | 101539836 | 101540187 | 352  | 1.6   | 0.000704 | 0.00541  | ENSMUSG0000010661 | Gm43103    | processed_p  | 101055528 | 101506329 | upstream     | -33683 | 33507  | shortestDistance |
| chr5 | 101659687 | 101659904 | 218  | -1.51 | 0.000411 | 0.00354  | ENSMUSG0000003518 | Nkx6-1     | protein_codi | 101658139 | 101664996 | inside       | 5200   | 1548   | shortestDistance |
| chr5 | 101816558 | 101817478 | 921  | -0.81 | 0.00814  | 0.0363   | ENSMUSG0000002933 | Cds1       | protein_codi | 101765130 | 101823858 | inside       | 51888  | 6380   | shortestDistance |
| chr5 | 101937901 | 101938868 | 968  | 0.99  | 0.00334  | 0.0182   | ENSMUSG0000004394 | Wdfy3      | protein_codi | 101832956 | 102069921 | inside       | 131537 | 104945 | shortestDistance |
| chr5 | 102373632 | 102373990 | 359  | -1.17 | 0.00882  | 0.0386   | ENSMUSG0000010629 | Gm42932    | processed_p  | 102416203 | 102416946 | upstream     | -42392 | 42213  | shortestDistance |
| chr5 | 102447349 | 102448045 | 697  | -1.46 | 2.67E-05 | 0.000376 | ENSMUSG0000010658 | 1700013M08 | antisense_RI | 102474290 | 102483289 | downstream   | 35592  | 26245  | shortestDistance |
| chr5 | 102571481 | 102572053 | 573  | 3.11  | 1.28E-11 | 1.63E-09 | ENSMUSG0000005731 | Arhgap24   | protein_codi | 102481391 | 102897937 | inside       | 90376  | 90090  | shortestDistance |
| chr5 | 102703382 | 102703699 | 362  | -0.88 | 0.0105   | 0.044    | ENSMUSG0000005731 | Arhgap24   | protein_codi | 102481391 | 102897937 | inside       | 222127 | 194238 | shortestDistance |
| chr5 | 102844923 | 102845652 | 730  | -0.93 | 0.00223  | 0.0134   | ENSMUSG0000005731 | Arhgap24   | protein_codi | 102481391 | 102897937 | inside       | 363897 | 52285  | shortestDistance |
| chr5 | 103211142 | 103211530 | 389  | -1.37 | 0.00283  | 0.0161   | ENSMUSG0000004670 | Mapk10     | protein_codi | 102907948 | 103211334 | overlapStart | -2     | 192    | shortestDistance |
| chr5 | 103387302 | 103388122 | 821  | -1.75 | 0.000549 | 0.00444  | ENSMUSG0000010468 | 5430427N15 | lincRNA      | 103354306 | 103356698 | upstream     | -31014 | 30604  | shortestDistance |
| chr5 | 103425654 | 103425980 | 327  | -0.96 | 0.00889  | 0.0388   | ENSMUSG0000003457 | Ptpn13     | protein_codi | 103425192 | 103598303 | inside       | 625    | 462    | shortestDistance |
| chr5 | 103518771 | 103519408 | 638  | -1.64 | 0.00297  | 0.0167   | ENSMUSG0000010458 | Gm42620    | antisense_RI | 103513445 | 103533021 | inside       | 13931  | 5326   | shortestDistance |
| chr5 | 103592841 | 103593127 | 287  | -1.29 | 0.0067   | 0.0312   | ENSMUSG0000003457 | Ptpn13     | protein_codi | 103425192 | 103598303 | inside       | 167792 | 5176   | shortestDistance |
| chr5 | 103705856 | 103706387 | 532  | 1.73  | 4.42E-06 | 8.28E-05 | ENSMUSG0000002931 | Afl1       | protein_codi | 103692374 | 103855322 | inside       | 13748  | 13482  | shortestDistance |
| chr5 | 103722621 | 103722898 | 278  | -1    | 0.00973  | 0.0416   | ENSMUSG0000002931 | Afl1       | protein_codi | 103692374 | 103855322 | inside       | 30386  | 30247  | shortestDistance |
| chr5 | 103746541 | 103747444 | 904  | 1.42  | 0.00455  | 0.0232   | ENSMUSG0000002931 | Afl1       | protein_codi | 103692374 | 103855322 | inside       | 54618  | 54167  | shortestDistance |
| chr5 | 103804288 | 103804527 | 240  | -1.36 | 0.00323  | 0.0178   | ENSMUSG0000002931 | Afl1       | protein_codi | 103692374 | 103855322 | inside       | 112034 | 50795  | shortestDistance |
| chr5 | 103838378 | 103838988 | 611  | 2.29  | 3.73E-07 | 1.02E-05 | ENSMUSG0000002931 | Afl1       | protein_codi |           |           |              |        |        |                  |

|      |           |           |      |       |          |          |                               |              |           |           |              |        |       |                  |
|------|-----------|-----------|------|-------|----------|----------|-------------------------------|--------------|-----------|-----------|--------------|--------|-------|------------------|
| chr5 | 107200939 | 107201378 | 440  | 1.19  | 0.00109  | 0.00766  | ENSMUSG0000002928Tgfb3        | protein_codi | 107106570 | 107289629 | inside       | 88471  | 88251 | shortestDistance |
| chr5 | 107219287 | 107219746 | 460  | 3.61  | 1.19E-11 | 1.53E-09 | ENSMUSG0000002928Tgfb3        | protein_codi | 107106570 | 107289629 | inside       | 70113  | 69883 | shortestDistance |
| chr5 | 107295119 | 107295523 | 405  | 2.41  | 4.07E-08 | 1.55E-06 | ENSMUSG0000002928Tgfb3        | protein_codi | 107106570 | 107289629 | upstream     | -5692  | 5490  | shortestDistance |
| chr5 | 107492482 | 107492901 | 420  | 2.91  | 8.78E-08 | 2.98E-06 | ENSMUSG0000011337A830010M2    | protein_codi | 107437997 | 107512556 | inside       | 54695  | 19655 | shortestDistance |
| chr5 | 107698453 | 107699500 | 1048 | 1.41  | 1.60E-05 | 0.000246 | ENSMUSG00000106334930428021   | lincRNA      | 107698212 | 107703480 | inside       | 4504   | 241   | shortestDistance |
| chr5 | 107708061 | 107708707 | 647  | 1.2   | 0.00134  | 0.00901  | ENSMUSG00000106334930428021   | lincRNA      | 107698212 | 107703480 | upstream     | -4904  | 4581  | shortestDistance |
| chr5 | 107749461 | 107750363 | 903  | 1.09  | 0.000518 | 0.00424  | ENSMUSG0000001183Ew5          | protein_codi | 107744795 | 107875107 | inside       | 125195 | 4666  | shortestDistance |
| chr5 | 107922720 | 107923316 | 597  | 2.09  | 2.33E-06 | 4.79E-05 | ENSMUSG0000002927Fam69a       | protein_codi | 107908053 | 107987085 | inside       | 64067  | 14667 | shortestDistance |
| chr5 | 107941259 | 107941591 | 333  | -1.57 | 0.000744 | 0.00564  | ENSMUSG0000002927Fam69a       | protein_codi | 107908053 | 107987085 | inside       | 45660  | 33206 | shortestDistance |
| chr5 | 107949588 | 107950060 | 473  | 1.6   | 5.88E-05 | 0.000724 | ENSMUSG0000002927Fam69a       | protein_codi | 107908053 | 107987085 | inside       | 37261  | 37025 | shortestDistance |
| chr5 | 107950579 | 107951053 | 475  | 1.28  | 0.000851 | 0.00628  | ENSMUSG0000002927Fam69a       | protein_codi | 107908053 | 107987085 | inside       | 36269  | 36032 | shortestDistance |
| chr5 | 108009825 | 108010098 | 274  | 2.11  | 0.000344 | 0.00307  | ENSMUSG00000008485Gm9850      | processed_p  | 108002260 | 108002486 | downstream   | 7702   | 7339  | shortestDistance |
| chr5 | 108065405 | 108065874 | 470  | 0.82  | 0.0105   | 0.0442   | ENSMUSG0000002926Mtf2         | protein_codi | 108065674 | 108109004 | overlapStart | -34    | 200   | shortestDistance |
| chr5 | 108369248 | 108369591 | 344  | -0.93 | 0.00988  | 0.0421   | ENSMUSG00000007276Gm10419     | lincRNA      | 108367769 | 108378239 | inside       | 1651   | 1479  | shortestDistance |
| chr5 | 108446928 | 108447415 | 488  | 2.72  | 6.76E-10 | 4.64E-08 | ENSMUSG0000002949Mfsd7a       | protein_codi | 108441054 | 108448891 | inside       | 1719   | 1476  | shortestDistance |
| chr5 | 108447787 | 108448153 | 367  | 1.2   | 0.0019   | 0.0118   | ENSMUSG0000002949Mfsd7a       | protein_codi | 108441054 | 108448891 | inside       | 921    | 738   | shortestDistance |
| chr5 | 109690438 | 109691292 | 855  | -0.96 | 0.000867 | 0.00637  | ENSMUSG000000072765430403G16  | protein_codi | 109674545 | 109691041 | overlapStart | 176    | 251   | shortestDistance |
| chr5 | 109751295 | 109752374 | 1080 | -0.94 | 0.00174  | 0.0111   | ENSMUSG0000000727649305221L4f | protein_codi | 109735990 | 109751886 | overlapStart | 52     | 488   | shortestDistance |
| chr5 | 109795873 | 109796748 | 876  | -0.96 | 0.000974 | 0.00698  | ENSMUSG0000010547A430073D23   | lincRNA      | 109769407 | 109796298 | overlapStart | -12    | 425   | shortestDistance |
| chr5 | 109844211 | 109844568 | 358  | -1.01 | 0.00209  | 0.0127   | ENSMUSG0000010504Gm10416      | TEC          | 109833501 | 109834145 | upstream     | -10245 | 10066 | shortestDistance |
| chr5 | 109844633 | 109845423 | 791  | -1    | 0.000605 | 0.0048   | ENSMUSG0000010504Gm10416      | TEC          | 109833501 | 109834145 | upstream     | -10883 | 10488 | shortestDistance |
| chr5 | 109866225 | 109867079 | 855  | -0.97 | 0.000748 | 0.00566  | ENSMUSG00000009714Gm26779     | lincRNA      | 109886231 | 109891137 | upstream     | -19579 | 19152 | shortestDistance |
| chr5 | 109923185 | 109923999 | 815  | -0.84 | 0.00341  | 0.0185   | ENSMUSG00000009001Gm15446     | protein_codi | 109923400 | 109943936 | overlapStart | 192    | 215   | shortestDistance |
| chr5 | 109996055 | 109996874 | 820  | -1.02 | 0.000423 | 0.00362  | ENSMUSG00000006661Zfp932      | protein_codi | 109996521 | 110010411 | overlapStart | -57    | 353   | shortestDistance |
| chr5 | 110057688 | 110058490 | 803  | -0.94 | 0.00111  | 0.00776  | ENSMUSG00000009096Gm17655     | protein_codi | 110046139 | 110072513 | inside       | 14424  | 11549 | shortestDistance |
| chr5 | 110211271 | 110211739 | 469  | 1.95  | 4.73E-08 | 1.76E-06 | ENSMUSG0000002950Goliga3      | protein_codi | 110176701 | 110226470 | inside       | 34804  | 14731 | shortestDistance |
| chr5 | 110479105 | 110479614 | 510  | 1.05  | 0.00216  | 0.0131   | ENSMUSG00000010560Gm32996     | processed_p  | 110480755 | 110482201 | downstream   | 2841   | 1141  | shortestDistance |
| chr5 | 110602909 | 110603639 | 731  | 2.87  | 3.37E-12 | 5.18E-10 | ENSMUSG00000003331Galnt9      | protein_codi | 110544355 | 110621380 | inside       | 58919  | 17741 | shortestDistance |
| chr5 | 110770127 | 110771224 | 1098 | 0.88  | 0.000409 | 0.0213   | ENSMUSG00000002950Ep400       | protein_codi | 110664373 | 110770717 | overlapStart | 41     | 507   | shortestDistance |
| chr5 | 110788660 | 110789065 | 406  | 1.12  | 0.00662  | 0.031    | ENSMUSG00000002951Ulk1        | protein_codi | 110784488 | 110810097 | inside       | 21235  | 4172  | shortestDistance |
| chr5 | 111432835 | 111433278 | 444  | 1.85  | 5.81E-06 | 0.000104 | ENSMUSG00000007057Mn1         | protein_codi | 111417362 | 111457033 | inside       | 15694  | 15473 | shortestDistance |
| chr5 | 111508955 | 111509758 | 804  | 0.84  | 0.00534  | 0.0263   | ENSMUSG00000007057Mn1         | protein_codi | 111417362 | 111457033 | downstream   | 91994  | 51922 | shortestDistance |
| chr5 | 111509873 | 111510183 | 311  | 0.87  | 0.0123   | 0.0496   | ENSMUSG00000007057Mn1         | protein_codi | 111417362 | 111457033 | downstream   | 92666  | 52840 | shortestDistance |
| chr5 | 111595571 | 111595840 | 270  | 2.27  | 0.000516 | 0.00423  | ENSMUSG00000005284C130026L21f | lincRNA      | 111581422 | 111604932 | inside       | 14284  | 9092  | shortestDistance |
| chr5 | 112179531 | 112180094 | 564  | 1.2   | 0.00119  | 0.0082   | ENSMUSG00000104531700016801f  | lincRNA      | 112156237 | 112165244 | downstream   | 23575  | 14287 | shortestDistance |
| chr5 | 112219803 | 112220053 | 251  | 1.15  | 0.0113   | 0.0465   | ENSMUSG00000009798Gm26953     | lincRNA      | 112215461 | 112233720 | inside       | 4467   | 4342  | shortestDistance |
| chr5 | 112265478 | 112266744 | 1267 | 1.56  | 1.51E-05 | 0.000234 | ENSMUSG00000002934Crybb1      | protein_codi | 112255815 | 112269585 | inside       | 10296  | 2841  | shortestDistance |
| chr5 | 112276098 | 112276900 | 803  | 1.04  | 0.000649 | 0.00507  | ENSMUSG00000002934Tps2        | protein_codi | 112276691 | 112315361 | overlapStart | -192   | 209   | shortestDistance |
| chr5 | 112279954 | 112280539 | 586  | 1.22  | 0.000882 | 0.00645  | ENSMUSG00000002934Tps2        | protein_codi | 112276691 | 112315361 | inside       | 3555   | 3263  | shortestDistance |
| chr5 | 112283636 | 112283905 | 270  | 1     | 0.0109   | 0.0452   | ENSMUSG00000002934Tps2        | protein_codi | 112276691 | 112315361 | inside       | 7079   | 6945  | shortestDistance |
| chr5 | 112298300 | 112298997 | 698  | 0.88  | 0.0082   | 0.0366   | ENSMUSG00000002934Tps2        | protein_codi | 112276691 | 112315361 | inside       | 21957  | 16364 | shortestDistance |
| chr5 | 112325258 | 112325561 | 304  | 1.36  | 0.000171 | 0.00174  | ENSMUSG00000002934Tfp11       | protein_codi | 112326358 | 112338073 | upstream     | -948   | 797   | shortestDistance |
| chr5 | 112326084 | 112326801 | 718  | 1.19  | 0.000635 | 0.00499  | ENSMUSG00000002934Tfp11       | protein_codi | 112326358 | 112338073 | overlapStart | 84     | 274   | shortestDistance |
| chr5 | 112342768 | 112343568 | 801  | 0.99  | 0.00493  | 0.0246   | ENSMUSG00000004232Hps4        | protein_codi | 112343083 | 112378414 | overlapStart | 85     | 315   | shortestDistance |
| chr5 | 112973641 | 112973939 | 299  | 1.26  | 0.00238  | 0.0141   | ENSMUSG00000004224Grk3        | protein_codi | 112910482 | 113015791 | inside       | 42001  | 41852 | shortestDistance |
| chr5 | 113009340 | 113009672 | 333  | 0.96  | 0.0117   | 0.0477   | ENSMUSG00000004224Grk3        | protein_codi | 112910482 | 113015791 | inside       | 6285   | 6119  | shortestDistance |
| chr5 | 113015375 | 113016367 | 993  | 1.45  | 5.31E-06 | 9.68E-05 | ENSMUSG00000004224Grk3        | protein_codi | 112910482 | 113015791 | overlapStart | -80    | 416   | shortestDistance |
| chr5 | 113099557 | 113099911 | 355  | 1.64  | 3.69E-05 | 0.000492 | ENSMUSG000000051332900026A02f | protein_codi | 113086323 | 113221236 | inside       | 121502 | 13234 | shortestDistance |
| chr5 | 113114250 | 113115142 | 893  | 1.19  | 0.0013   | 0.00879  | ENSMUSG000000051332900026A02f | protein_codi | 113086323 | 113221236 | inside       | 106540 | 27927 | shortestDistance |
| chr5 | 113119232 | 113120418 | 1187 | 1.33  | 6.74E-05 | 0.000809 | ENSMUSG0000010457F830115805f  | TEC          | 113117571 | 113119464 | overlapStart | -361   | 232   | shortestDistance |
| chr5 | 113164509 | 113165815 | 1307 | 1.08  | 0.00205  | 0.0125   | ENSMUSG0000010620Gm43094      | TEC          | 113165314 | 113166234 | overlapEnd   | 1072   | 419   | shortestDistance |
| chr5 | 113174989 | 113175616 | 628  | 1.04  | 0.00395  | 0.0208   | ENSMUSG000000051332900026A02f | protein_codi | 113086323 | 113221236 | inside       | 45934  | 45620 | shortestDistance |
| chr5 | 113181489 | 113181749 | 261  | 1.55  | 0.000488 | 0.00405  | ENSMUSG000000051332900026A02f | protein_codi | 113086323 | 113221236 | inside       | 39617  | 39487 | shortestDistance |
| chr5 | 113220977 | 113221544 | 568  | 0.96  | 0.00733  | 0.0335   | ENSMUSG000000051332900026A02f | protein_codi | 113086323 | 113221236 | overlapStart | -24    | 259   | shortestDistance |
| chr5 | 113262441 | 113262785 | 345  | 2.22  | 1.44E-05 | 0.000225 | ENSMUSG00000004219Cmklr1      | protein_codi | 113612354 | 113650426 | inside       | 23813  | 14087 | shortestDistance |
| chr5 | 113644120 | 113644840 | 721  | 1.27  | 0.000212 | 0.00207  | ENSMUSG00000004219Cmklr1      | protein_codi | 113612354 | 113650426 | inside       | 5946   | 5586  | shortestDistance |
| chr5 | 113650405 | 113650983 | 579  | 1.34  | 0.000117 | 0.00127  | ENSMUSG00000004219Cmklr1      | protein_codi | 113612354 | 113650426 | overlapStart | -268   | 21    | shortestDistance |
| chr5 | 113672411 | 113672863 | 473  | 1.11  | 0.00111  | 0.00776  | ENSMUSG000000042181700069116f | protein_codi | 113692422 | 113724772 | downstream   | 52135  | 19559 | shortestDistance |
| chr5 | 113786936 | 113787412 | 455  | 1.45  | 0.000306 | 0.00278  | ENSMUSG00000005467Tmem119     | protein_codi | 113793729 | 113800516 | downstream   | 13342  | 6317  | shortestDistance |
| chr5 | 113797117 | 113797476 | 360  | 1.78  | 0.00029  | 0.00266  | ENSMUSG00000005467Tmem119     | protein_codi | 113793729 | 113800516 | inside       | 3220   | 3040  | shortestDistance |
| chr5 | 113842430 | 113842867 | 438  | 2.81  | 2.99E-11 | 3.33E-09 | ENSMUSG00000009045Gm17122     | antisense_RI | 113842601 | 113843116 | overlapStart | 47     | 171   | shortestDistance |
| chr5 | 113872973 | 113873294 | 322  | 1.15  | 0.0041   | 0.0214   | ENSMUSG00000000453Cora1c      | protein_codi | 113842436 | 113908758 | inside       | 35624  | 30537 | shortestDistance |
| chr5 | 114259538 | 114259838 | 301  | -1.05 | 0.00672  | 0.0313   | ENSMUSG00000004200Fxm4        | protein_codi | 114254164 | 114273807 | inside       | 14119  | 5374  | shortestDistance |
| chr5 | 114379041 | 114379356 | 316  | 3.13  | 1.33E-10 | 1.18E-08 | ENSMUSG0000000105Kctd10       | protein_codi | 114363567 | 114380508 | inside       | 1310   | 1152  | shortestDistance |
| chr5 | 114594670 | 114595315 | 646  | 1.61  | 1.63E-05 | 0.00025  | ENSMUSG00000004928Fam222a     | protein_codi | 114568016 | 114613220 | inside       | 26976  | 17905 | shortestDistance |
| chr5 | 114823190 | 114823692 | 503  | 1.43  | 0.000163 | 0.00167  | ENSMUSG000000092482610524H08f | protein_codi | 114821935 | 114823468 | overlapStart | 27     | 224   | shortestDistance |
| chr5 | 114922899 | 114923540 | 642  | 1.27  | 0.000601 | 0.00478  | ENSMUSG00000008747Gm13822     | antisense_RI | 114917318 | 114923277 | overlapStart | 57     | 263   | shortestDistance |
| chr5 | 115134657 | 115135156 | 500  | 1.19  | 0.0104   | 0.00737  | ENSMUSG00000004656Unc119b     | protein_codi | 115122550 | 115134975 | overlapStart | 69     | 181   | shortestDistance |
| chr5 | 115266857 | 115267488 | 632  | 1.06  | 0.00787  | 0.0354   | ENSMUSG00000004174Rnf10       | protein_codi | 115241412 | 115272898 | inside       | 5726   | 5410  | shortestDistance |
| chr5 | 115489408 | 115490730 | 1323 | 1     | 0.00241  | 0.0142   | ENSMUSG00000009624Gm24265     | snRNA        | 115489459 | 115489599 | includeFeatu | 610    | 51    | shortestDistance |
| chr5 | 115500421 | 115500737 | 317  | 3.22  | 8.18E-10 | 5.50E-08 |                               |              |           |           |              |        |       |                  |

|      |           |           |      |       |          |          |                    |          |               |           |           |              |        |        |                  |
|------|-----------|-----------|------|-------|----------|----------|--------------------|----------|---------------|-----------|-----------|--------------|--------|--------|------------------|
| chr5 | 118483427 | 118484033 | 607  | 0.89  | 0.00873  | 0.0383   | ENSMUSG0000008236  | Gm15754  | transcribed_j | 118486967 | 118503500 | upstream     | -3237  | 2934   | shortestDistance |
| chr5 | 118559843 | 118561070 | 1228 | 1.06  | 0.00165  | 0.0106   | ENSMUSG0000001807  | Med13l   | protein_codi  | 118560679 | 118765438 | overlapStart | -223   | 391    | shortestDistance |
| chr5 | 118636403 | 118637269 | 867  | 0.94  | 0.00705  | 0.0325   | ENSMUSG0000001807  | Med13l   | protein_codi  | 118560679 | 118765438 | inside       | 76157  | 75724  | shortestDistance |
| chr5 | 118658238 | 118658883 | 646  | 1.04  | 0.00322  | 0.0178   | ENSMUSG0000001807  | Med13l   | protein_codi  | 118560679 | 118765438 | inside       | 97881  | 97559  | shortestDistance |
| chr5 | 119634899 | 119635234 | 336  | 1.43  | 0.00359  | 0.0193   | ENSMUSG0000000875  | Tbx3os1  | antisense_RI  | 119570130 | 119671365 | inside       | 36299  | 36131  | shortestDistance |
| chr5 | 120018074 | 120018682 | 609  | 1.17  | 0.00673  | 0.0314   | ENSMUSG0000000641  | n-Rs5176 | rRNA          | 120064335 | 120064443 | upstream     | -45957 | 45653  | shortestDistance |
| chr5 | 120102780 | 120103135 | 356  | 1.36  | 0.000322 | 0.0029   | ENSMUSG0000002959  | Rbm19    | protein_codi  | 120116465 | 120198981 | upstream     | -13507 | 13330  | shortestDistance |
| chr5 | 120116258 | 120117070 | 813  | 0.9   | 0.00288  | 0.0368   | ENSMUSG0000002959  | Rbm19    | protein_codi  | 120116465 | 120198981 | overlapStart | 199    | 207    | shortestDistance |
| chr5 | 120130171 | 120130569 | 399  | 2.09  | 1.20E-06 | 2.73E-05 | ENSMUSG00000009736 | Gm10390  | antisense_RI  | 120121096 | 120139263 | inside       | 8893   | 8694   | shortestDistance |
| chr5 | 120136289 | 120136633 | 345  | 2.25  | 2.10E-05 | 0.000308 | ENSMUSG00000009736 | Gm10390  | antisense_RI  | 120121096 | 120139263 | inside       | 2802   | 2630   | shortestDistance |
| chr5 | 120165072 | 120165473 | 402  | 1.92  | 2.89E-06 | 5.77E-05 | ENSMUSG0000002959  | Rbm19    | protein_codi  | 120116465 | 120198981 | inside       | 48807  | 33508  | shortestDistance |
| chr5 | 120495132 | 120495407 | 276  | -1.52 | 0.000144 | 0.0015   | ENSMUSG00000002959 | Ptld2    | protein_codi  | 120483282 | 120503625 | inside       | 8355   | 8218   | shortestDistance |
| chr5 | 120558675 | 120559187 | 513  | 1.04  | 0.0114   | 0.0468   | ENSMUSG00000003274 | Ptcln1   | protein_codi  | 120534153 | 120588673 | inside       | 29742  | 24522  | shortestDistance |
| chr5 | 120560335 | 120561189 | 855  | 0.84  | 0.00968  | 0.0414   | ENSMUSG00000003274 | Ptcln1   | protein_codi  | 120534153 | 120588673 | inside       | 27911  | 26182  | shortestDistance |
| chr5 | 120570178 | 120570841 | 664  | 1.23  | 0.000743 | 0.00564  | ENSMUSG00000003274 | Ptcln1   | protein_codi  | 120534153 | 120588673 | inside       | 18163  | 17832  | shortestDistance |
| chr5 | 120644223 | 120644591 | 369  | 1     | 0.00972  | 0.0415   | ENSMUSG00000010700 | Gm42657  | processed_g   | 120641621 | 120641831 | downstream   | 2786   | 2392   | shortestDistance |
| chr5 | 121124173 | 121124747 | 575  | 1.32  | 0.000233 | 0.00223  | ENSMUSG00000004373 | Ptgn11   | protein_codi  | 121130533 | 121191397 | downstream   | 66937  | 5786   | shortestDistance |
| chr5 | 121142737 | 121143024 | 288  | 1.3   | 0.00552  | 0.0269   | ENSMUSG00000004373 | Ptgn11   | protein_codi  | 121130533 | 121191397 | inside       | 48517  | 12204  | shortestDistance |
| chr5 | 121196829 | 121197109 | 281  | 2.31  | 2.74E-05 | 0.000383 | ENSMUSG00000004373 | Ptgn11   | protein_codi  | 121130533 | 121191397 | upstream     | -5572  | 5432   | shortestDistance |
| chr5 | 121397406 | 121398290 | 885  | 0.88  | 0.00929  | 0.0401   | ENSMUSG00000004271 | Naa25    | protein_codi  | 121397936 | 121444378 | overlapStart | -88    | 354    | shortestDistance |
| chr5 | 122145325 | 122146074 | 750  | 1.09  | 0.0114   | 0.0469   | ENSMUSG00000004303 | Cdc63    | protein_codi  | 122108040 | 122140823 | upstream     | -4877  | 4502   | shortestDistance |
| chr5 | 122242565 | 122242992 | 428  | 2.12  | 7.83E-07 | 1.91E-05 | ENSMUSG00000003859 | Tctn1    | protein_codi  | 122237848 | 122264460 | inside       | 21682  | 4717   | shortestDistance |
| chr5 | 122303359 | 122303815 | 457  | 1.51  | 9.60E-05 | 0.0108   | ENSMUSG00000003858 | Ptpt7    | protein_codi  | 122284365 | 122324281 | inside       | 19222  | 18994  | shortestDistance |
| chr5 | 122318162 | 122318466 | 305  | 1.61  | 0.000108 | 0.00119  | ENSMUSG00000003858 | Ptpt7    | protein_codi  | 122284365 | 122324281 | inside       | 33949  | 5815   | shortestDistance |
| chr5 | 122769163 | 122769642 | 480  | 1.59  | 3.30E-05 | 0.000449 | ENSMUSG00000002947 | Cammk2   | protein_codi  | 122731170 | 122779409 | inside       | 10007  | 9767   | shortestDistance |
| chr5 | 122799038 | 122799417 | 380  | -1.02 | 0.0115   | 0.0472   | ENSMUSG00000002947 | Anapc5   | protein_codi  | 122787459 | 122821339 | inside       | 22111  | 11579  | shortestDistance |
| chr5 | 123662141 | 123662485 | 345  | 1.13  | 0.00463  | 0.0234   | ENSMUSG00000004955 | Clip1    | protein_codi  | 123577795 | 123684618 | inside       | 22305  | 22133  | shortestDistance |
| chr5 | 123713798 | 123714137 | 340  | 3.82  | 1.64E-10 | 1.40E-08 | ENSMUSG00000002942 | Zcchc8   | protein_codi  | 123698294 | 123721100 | inside       | 7132   | 6963   | shortestDistance |
| chr5 | 123832161 | 123832822 | 662  | 2.91  | 3.03E-12 | 4.73E-10 | ENSMUSG00000002941 | Kntc1    | protein_codi  | 123749716 | 123821593 | downstream   | 82776  | 10568  | shortestDistance |
| chr5 | 123865385 | 123865863 | 479  | 2.22  | 2.13E-07 | 6.36E-06 | ENSMUSG00000004550 | Hcar2    | protein_codi  | 123863570 | 123865499 | overlapStart | -125   | 114    | shortestDistance |
| chr5 | 123906476 | 123906740 | 265  | 1.08  | 0.00702  | 0.0324   | ENSMUSG00000002312 | Dcnr     | protein_codi  | 123907175 | 123928835 | upstream     | -567   | 435    | shortestDistance |
| chr5 | 123973185 | 123973765 | 581  | 1.12  | 0.00295  | 0.0166   | ENSMUSG00000000091 | Hipr1    | protein_codi  | 123973628 | 124005558 | overlapStart | -153   | 137    | shortestDistance |
| chr5 | 124025170 | 124025499 | 330  | 1.29  | 0.00424  | 0.0219   | ENSMUSG00000000627 | Vps37b   | protein_codi  | 124004641 | 124032270 | inside       | 6936   | 6771   | shortestDistance |
| chr5 | 124074835 | 124075313 | 479  | 1.13  | 0.00195  | 0.0121   | ENSMUSG00000002940 | Acb9n    | protein_codi  | 124061530 | 124095798 | inside       | 20724  | 13305  | shortestDistance |
| chr5 | 124095319 | 124096377 | 1059 | 0.95  | 0.00667  | 0.0311   | ENSMUSG00000002940 | Acb9n    | protein_codi  | 124061530 | 124095798 | overlapStart | -50    | 479    | shortestDistance |
| chr5 | 124478140 | 124478552 | 413  | 0.89  | 0.00883  | 0.0386   | ENSMUSG00000002940 | Rilp2    | protein_codi  | 124463265 | 124478366 | overlapStart | 20     | 186    | shortestDistance |
| chr5 | 124540040 | 124541625 | 1186 | 0.82  | 0.0103   | 0.0434   | ENSMUSG00000002939 | Tmed2    | protein_codi  | 124540695 | 124550506 | overlapStart | 337    | 255    | shortestDistance |
| chr5 | 124582561 | 124582937 | 377  | 1.29  | 0.00168  | 0.0108   | ENSMUSG00000002938 | Gf2h3    | protein_codi  | 124579140 | 124597680 | inside       | 36669  | 3421   | shortestDistance |
| chr5 | 125052152 | 125052958 | 807  | 1.12  | 0.002    | 0.0123   | ENSMUSG00000002947 | Ncor2    | protein_codi  | 125017153 | 125179219 | inside       | 12604  | 34999  | shortestDistance |
| chr5 | 125183498 | 125184129 | 632  | 0.79  | 0.00994  | 0.0422   | ENSMUSG00000002947 | Ncor2    | protein_codi  | 125017153 | 125179219 | upstream     | -4595  | 4279   | shortestDistance |
| chr5 | 125203008 | 125203644 | 637  | -0.99 | 0.00329  | 0.018    | ENSMUSG00000002947 | Ncor2    | protein_codi  | 125017153 | 125179219 | upstream     | -24107 | 23789  | shortestDistance |
| chr5 | 125215833 | 125216202 | 370  | -1.16 | 0.0024   | 0.0142   | ENSMUSG0000010503  | Gm32585  | lincRNA       | 125238314 | 125272815 | downstream   | 56797  | 22112  | shortestDistance |
| chr5 | 125271858 | 125271942 | 358  | 1.25  | 0.00069  | 0.00533  | ENSMUSG0000010503  | Gm32585  | lincRNA       | 125238314 | 125272815 | inside       | 1051   | 873    | shortestDistance |
| chr5 | 125273611 | 125274149 | 539  | 1.72  | 6.59E-06 | 0.000116 | ENSMUSG0000010503  | Gm32585  | lincRNA       | 125238314 | 125272815 | upstream     | -1065  | 796    | shortestDistance |
| chr5 | 125291906 | 125292246 | 341  | 2.13  | 1.91E-06 | 4.04E-05 | ENSMUSG00000003793 | Scarb1   | protein_codi  | 125277087 | 125341094 | inside       | 49018  | 14819  | shortestDistance |
| chr5 | 125339027 | 125339758 | 732  | 1.03  | 0.00332  | 0.0181   | ENSMUSG00000003793 | Scarb1   | protein_codi  | 125277087 | 125341094 | inside       | 1702   | 1336   | shortestDistance |
| chr5 | 125368411 | 125368476 | 336  | 2.15  | 3.85E-05 | 0.000509 | ENSMUSG0000010493  | Gm40323  | lincRNA       | 125361175 | 125370760 | inside       | 7133   | 2284   | shortestDistance |
| chr5 | 125392935 | 125393595 | 661  | 0.94  | 0.00753  | 0.0342   | ENSMUSG00000007261 | Gm10382  | protein_codi  | 125389322 | 125390554 | downstream   | 3943   | 2381   | shortestDistance |
| chr5 | 125412032 | 125412261 | 230  | 1.43  | 0.00089  | 0.00649  | ENSMUSG00000002948 | Dhx37    | protein_codi  | 125413858 | 125434121 | downstream   | 21975  | 1597   | shortestDistance |
| chr5 | 125419018 | 125419533 | 516  | -1.08 | 0.00188  | 0.0117   | ENSMUSG00000002948 | Dhx37    | protein_codi  | 125413858 | 125434121 | inside       | 14845  | 5160   | shortestDistance |
| chr5 | 125434460 | 125434664 | 205  | 1.91  | 3.76E-05 | 5.00E-04 | ENSMUSG00000002948 | Dhx37    | protein_codi  | 125413858 | 125434121 | upstream     | -441   | 339    | shortestDistance |
| chr5 | 125444516 | 125444933 | 418  | 2.71  | 1.38E-10 | 1.21E-08 | ENSMUSG00000003790 | Brlb3p   | protein_codi  | 125441568 | 125460370 | inside       | 3156   | 2948   | shortestDistance |
| chr5 | 125583773 | 125584255 | 483  | -3.79 | 6.38E-06 | 0.000113 | ENSMUSG00000000740 | Tmem132b | protein_codi  | 125531774 | 125792583 | inside       | 52240  | 5199   | shortestDistance |
| chr5 | 125683421 | 125684020 | 600  | -2.2  | 6.88E-05 | 0.000822 | ENSMUSG00000007049 | Tmem132b | protein_codi  | 125531774 | 125792583 | inside       | 151946 | 108563 | shortestDistance |
| chr5 | 125745775 | 125746101 | 327  | -1.16 | 0.00166  | 0.0106   | ENSMUSG00000007049 | Tmem132b | protein_codi  | 125531774 | 125792583 | inside       | 214164 | 46482  | shortestDistance |
| chr5 | 127491624 | 127492145 | 522  | 2.84  | 1.13E-11 | 1.48E-09 | ENSMUSG00000003432 | Tmem132c | protein_codi  | 127241808 | 127565793 | inside       | 250076 | 73648  | shortestDistance |
| chr5 | 129124579 | 129124922 | 344  | 2.31  | 4.47E-06 | 8.34E-05 | ENSMUSG00000004401 | Adgrd1   | protein_codi  | 129096750 | 129204599 | inside       | 28000  | 27829  | shortestDistance |
| chr5 | 129241602 | 129242422 | 821  | -1    | 0.00618  | 0.0293   | ENSMUSG00000004401 | Adgrd1   | protein_codi  | 129096750 | 129204599 | downstream   | 145262 | 37003  | shortestDistance |
| chr5 | 129454874 | 129455795 | 922  | -1.04 | 0.00131  | 0.00885  | ENSMUSG0000010487  | Gm40332  | TEC           | 129500064 | 129501001 | downstream   | 45667  | 44269  | shortestDistance |
| chr5 | 129463572 | 129464043 | 472  | -1.75 | 0.00958  | 0.0411   | ENSMUSG0000010487  | Gm40332  | TEC           | 129500064 | 129501001 | downstream   | 37193  | 36021  | shortestDistance |
| chr5 | 129702957 | 129703885 | 929  | 3.09  | 5.75E-15 | 2.67E-12 | ENSMUSG00000003421 | 14-Sep   | protein_codi  | 129683391 | 129708512 | inside       | 5091   | 4627   | shortestDistance |
| chr5 | 129924856 | 129925187 | 332  | 2.71  | 2.17E-07 | 6.44E-06 | ENSMUSG00000009578 | Nupr1l   | protein_codi  | 129908540 | 129913789 | downstream   | 16482  | 11067  | shortestDistance |
| chr5 | 129941127 | 129942226 | 1100 | 0.95  | 0.0046   | 0.0233   | ENSMUSG00000006673 | Vkor1l1  | protein_codi  | 129941970 | 129986692 | overlapStart | -294   | 256    | shortestDistance |
| chr5 | 130036359 | 130036629 | 271  | 1.4   | 0.00314  | 0.0174   | ENSMUSG00000002553 | Crcp     | protein_codi  | 130029290 | 130060789 | inside       | 7204   | 7069   | shortestDistance |
| chr5 | 130205482 | 130205913 | 432  | 1.74  | 4.27E-05 | 0.000555 | ENSMUSG00000002534 | Rabgef1  | protein_codi  | 130171798 | 130214342 | inside       | 33900  | 8429   | shortestDistance |
| chr5 | 130236320 | 130236739 | 420  | 2.24  | 6.27E-06 | 0.000111 | ENSMUSG00000002530 | Tmem248  | protein_codi  | 130217081 | 130243765 | inside       | 19449  | 7026   | shortestDistance |
| chr5 | 130329931 | 130330307 | 377  | -1.1  | 0.00408  | 0.0213   | ENSMUSG00000005631 | Tyw1     | protein_codi  | 130255619 | 130341563 | inside       | 74500  | 11256  | shortestDistance |
| chr5 | 130688328 | 130688907 | 580  | -1.7  | 0.000196 | 0.00194  | ENSMUSG00000002967 | Caln1    | protein_codi  | 130369455 | 130847412 | inside       | 319163 | 15805  | shortestDistance |
| chr5 | 130740892 | 130741287 | 396  | -2.07 | 7.74E-06 | 0.000133 | ENSMUSG00000006037 | Caln1    | protein_codi  | 130369455 | 130847412 | inside       | 371635 | 106125 | shortestDistance |
| chr5 | 131584243 | 131       |      |       |          |          |                    |          |               |           |           |              |        |        |                  |

|      |           |           |      |       |          |          |                   |            |              |           |           |              |        |        |                  |
|------|-----------|-----------|------|-------|----------|----------|-------------------|------------|--------------|-----------|-----------|--------------|--------|--------|------------------|
| chr5 | 136217011 | 136217685 | 675  | 2.22  | 1.28E-08 | 5.82E-07 | ENSMUSG0000000505 | Sh2b2      | protein_codi | 136218147 | 136246556 | downstream   | 29208  | 462    | shortestDistance |
| chr5 | 136217894 | 136218502 | 609  | 1.24  | 0.00224  | 0.0134   | ENSMUSG0000000505 | Sh2b2      | protein_codi | 136218147 | 136246556 | overlapEnd   | 28358  | 253    | shortestDistance |
| chr5 | 136449762 | 136450142 | 381  | -1.44 | 0.000345 | 0.00307  | ENSMUSG0000000297 | Cux1       | protein_codi | 136248135 | 136567490 | inside       | 117538 | 117348 | shortestDistance |
| chr5 | 136458376 | 136459214 | 839  | 0.89  | 0.00652  | 0.0306   | ENSMUSG0000000297 | Cux1       | protein_codi | 136248135 | 136567490 | inside       | 108695 | 108276 | shortestDistance |
| chr5 | 136482287 | 136482769 | 483  | 2.06  | 1.12E-06 | 2.57E-05 | ENSMUSG0000000297 | Cux1       | protein_codi | 136248135 | 136567490 | inside       | 84962  | 84721  | shortestDistance |
| chr5 | 136487573 | 136488114 | 542  | 1.1   | 0.00904  | 0.0393   | ENSMUSG0000000297 | Cux1       | protein_codi | 136248135 | 136567490 | inside       | 79646  | 79376  | shortestDistance |
| chr5 | 136642002 | 136642655 | 654  | 2.33  | 1.06E-06 | 2.46E-05 | ENSMUSG0000000547 | Myf10      | protein_codi | 136693146 | 136701094 | upstream     | -50818 | 50491  | shortestDistance |
| chr5 | 136953747 | 136954051 | 305  | 1.72  | 2.77E-05 | 0.000387 | ENSMUSG0000000190 | Fis1       | protein_codi | 136953275 | 136966234 | inside       | 624    | 472    | shortestDistance |
| chr5 | 136973749 | 136973989 | 241  | 3.91  | 7.90E-09 | 3.80E-07 | ENSMUSG0000000017 | Cldn15     | protein_codi | 136966616 | 136975858 | inside       | 7253   | 1869   | shortestDistance |
| chr5 | 137079810 | 137080154 | 345  | 2.12  | 0.000124 | 0.00133  | ENSMUSG0000000371 | Serpine1   | protein_codi | 137061504 | 137072268 | upstream     | -7714  | 7542   | shortestDistance |
| chr5 | 137179892 | 137180328 | 437  | 1.16  | 0.0053   | 0.0261   | ENSMUSG0000010619 | Gm20768    | processed_g  | 137186830 | 137189167 | downstream   | 9057   | 6502   | shortestDistance |
| chr5 | 137263852 | 137264698 | 847  | 1.51  | 0.000224 | 0.00216  | ENSMUSG0000010573 | Gm42456    | lincRNA      | 137274093 | 137288662 | downstream   | 24387  | 9395   | shortestDistance |
| chr5 | 137671682 | 137672274 | 593  | 1.36  | 0.00125  | 0.00854  | ENSMUSG0000000297 | Agf2       | protein_codi | 137650463 | 137684726 | inside       | 12748  | 12452  | shortestDistance |
| chr5 | 137686102 | 137686466 | 365  | 0.99  | 0.00993  | 0.0422   | ENSMUSG0000000791 | Gm15498    | lincRNA      | 137685154 | 137690751 | inside       | 4467   | 948    | shortestDistance |
| chr5 | 137748397 | 137748894 | 498  | 1.19  | 0.00205  | 0.0125   | ENSMUSG0000000297 | Tsc22d4    | protein_codi | 137745730 | 137768450 | inside       | 2916   | 2667   | shortestDistance |
| chr5 | 137749175 | 137749435 | 261  | 1.97  | 2.92E-06 | 5.81E-05 | ENSMUSG0000000297 | Tsc22d4    | protein_codi | 137745730 | 137768450 | inside       | 3575   | 3445   | shortestDistance |
| chr5 | 137825042 | 137825372 | 331  | 2.04  | 0.00047  | 0.00393  | ENSMUSG0000000462 | Pilra      | protein_codi | 137821952 | 137836281 | inside       | 11074  | 3090   | shortestDistance |
| chr5 | 137828744 | 137829102 | 359  | 3.99  | 7.11E-15 | 3.12E-12 | ENSMUSG0000000462 | Pilra      | protein_codi | 137821952 | 137836281 | inside       | 7358   | 6792   | shortestDistance |
| chr5 | 137882919 | 137883726 | 808  | 1.11  | 0.00223  | 0.0134   | ENSMUSG0000010643 | Gm3103     | processed_g  | 137880071 | 137888822 | upstream     | -4749  | 4345   | shortestDistance |
| chr5 | 138195598 | 138195843 | 246  | 1.15  | 0.00694  | 0.0321   | ENSMUSG0000000492 | Hblac1     | protein_codi | 138194314 | 138195621 | overlapEnd   | 1406   | 23     | shortestDistance |
| chr5 | 138222128 | 138222465 | 338  | 1.08  | 0.00608  | 0.0289   | ENSMUSG0000000846 | Gm22956    | snRNA        | 138219737 | 138219816 | downstream   | 2559   | 2312   | shortestDistance |
| chr5 | 138227306 | 138227752 | 447  | 0.92  | 0.00351  | 0.0189   | ENSMUSG0000000047 | Nxpe5      | protein_codi | 138225898 | 138253363 | inside       | 1631   | 1408   | shortestDistance |
| chr5 | 138228103 | 138228357 | 255  | 1.77  | 3.96E-06 | 7.52E-05 | ENSMUSG0000000047 | Nxpe5      | protein_codi | 138225898 | 138253363 | inside       | 2332   | 2205   | shortestDistance |
| chr5 | 138256956 | 138257466 | 511  | 1.35  | 4.56E-05 | 0.000585 | ENSMUSG0000000505 | Lamtor4    | protein_codi | 138255482 | 138259398 | inside       | 1729   | 1474   | shortestDistance |
| chr5 | 138682857 | 138683725 | 869  | 2.36  | 1.75E-06 | 3.76E-05 | ENSMUSG0000000561 | A430033K04 | protein_codi | 138622859 | 138652414 | downstream   | 60432  | 30443  | shortestDistance |
| chr5 | 138730735 | 138731318 | 584  | 0.94  | 0.00965  | 0.0413   | ENSMUSG0000010329 | Gm38232    | TEC          | 138725395 | 138726185 | downstream   | 5631   | 4550   | shortestDistance |
| chr5 | 138994845 | 138995535 | 691  | 0.97  | 0.00614  | 0.0292   | ENSMUSG0000000758 | G330403108 | antisense_RI | 138995056 | 139000577 | overlapStart | 134    | 211    | shortestDistance |
| chr5 | 139175008 | 139175517 | 510  | -1.1  | 0.00247  | 0.0145   | ENSMUSG0000000285 | Dnaaf5     | protein_codi | 139150223 | 139186510 | inside       | 25039  | 10993  | shortestDistance |
| chr5 | 139196904 | 139197333 | 430  | 1.08  | 0.00219  | 0.0132   | ENSMUSG0000000361 | Sun1       | protein_codi | 139200637 | 139249840 | upstream     | -3519  | 3304   | shortestDistance |
| chr5 | 139286615 | 139287505 | 891  | 0.96  | 0.00509  | 0.0252   | ENSMUSG0000000561 | Adap1      | protein_codi | 139271876 | 139325622 | inside       | 38562  | 14739  | shortestDistance |
| chr5 | 139288407 | 139288724 | 318  | 1.58  | 0.00112  | 0.00123  | ENSMUSG0000000561 | Adap1      | protein_codi | 139271876 | 139325622 | inside       | 37056  | 16531  | shortestDistance |
| chr5 | 139364191 | 139365070 | 880  | 1.08  | 0.00189  | 0.0118   | ENSMUSG0000000535 | 3110082117 | protein_codi | 139359739 | 139460527 | inside       | 95897  | 4452   | shortestDistance |
| chr5 | 139380268 | 139380785 | 518  | 1.19  | 0.000328 | 0.00295  | ENSMUSG0000000441 | Gpr146     | protein_codi | 139377697 | 139396415 | inside       | 2829   | 2571   | shortestDistance |
| chr5 | 139404935 | 139405390 | 456  | 1.39  | 0.000136 | 0.00144  | ENSMUSG0000000449 | C13005018  | protein_codi | 139405280 | 139415623 | overlapStart | -118   | 110    | shortestDistance |
| chr5 | 139734802 | 139735128 | 327  | 1.34  | 7.27E-05 | 0.000858 | ENSMUSG0000000361 | Mical2     | protein_codi | 139706696 | 139736336 | inside       | 1371   | 1208   | shortestDistance |
| chr5 | 140225120 | 140225778 | 659  | 3.72  | 7.60E-12 | 1.05E-09 | ENSMUSG0000000295 | Madl11     | protein_codi | 140008689 | 140321552 | inside       | 96103  | 95774  | shortestDistance |
| chr5 | 140502996 | 140503340 | 345  | 1.46  | 0.000157 | 0.00162  | ENSMUSG0000000365 | Chst12     | protein_codi | 140505550 | 140525724 | upstream     | -2382  | 2210   | shortestDistance |
| chr5 | 140733282 | 140733766 | 485  | 1.9   | 1.00E-06 | 2.36E-05 | ENSMUSG0000000502 | Amz1       | protein_codi | 140724127 | 140761439 | inside       | 9397   | 9155   | shortestDistance |
| chr5 | 140748367 | 140748721 | 355  | 1.65  | 1.61E-05 | 0.000247 | ENSMUSG0000000502 | Amz1       | protein_codi | 140724127 | 140761439 | inside       | 24417  | 12718  | shortestDistance |
| chr5 | 140764880 | 140765240 | 361  | 1.49  | 0.000283 | 0.00261  | ENSMUSG0000000014 | Gna12      | protein_codi | 140758408 | 140830431 | inside       | 65371  | 6472   | shortestDistance |
| chr5 | 140767718 | 140768136 | 419  | 0.97  | 0.0123   | 0.0497   | ENSMUSG0000000014 | Gna12      | protein_codi | 140758408 | 140830431 | inside       | 62504  | 9310   | shortestDistance |
| chr5 | 140781548 | 140781966 | 419  | 2.43  | 4.87E-07 | 1.28E-05 | ENSMUSG0000000014 | Gna12      | protein_codi | 140758408 | 140830431 | inside       | 48674  | 23140  | shortestDistance |
| chr5 | 140794934 | 140795600 | 667  | 2.42  | 2.63E-10 | 2.07E-08 | ENSMUSG0000000014 | Gna12      | protein_codi | 140758408 | 140830431 | inside       | 35164  | 34831  | shortestDistance |
| chr5 | 140814288 | 140814815 | 528  | 1.66  | 1.30E-05 | 0.000206 | ENSMUSG0000000014 | Gna12      | protein_codi | 140758408 | 140830431 | inside       | 15879  | 15616  | shortestDistance |
| chr5 | 140818727 | 140819014 | 288  | 1.59  | 0.00139  | 0.00927  | ENSMUSG0000000014 | Gna12      | protein_codi | 140758408 | 140830431 | inside       | 11561  | 11417  | shortestDistance |
| chr5 | 140858401 | 140858694 | 294  | 1.51  | 0.000874 | 0.00641  | ENSMUSG0000000365 | Card11     | protein_codi | 140872990 | 141000582 | downstream   | 142034 | 14296  | shortestDistance |
| chr5 | 140873924 | 140874343 | 420  | 1.57  | 3.63E-05 | 0.000486 | ENSMUSG0000000365 | Card11     | protein_codi | 140872990 | 141000582 | inside       | 126448 | 934    | shortestDistance |
| chr5 | 140889497 | 140890008 | 512  | 0.95  | 0.00755  | 0.0342   | ENSMUSG0000000365 | Card11     | protein_codi | 140872990 | 141000582 | inside       | 110830 | 16507  | shortestDistance |
| chr5 | 140992167 | 140992858 | 692  | 1.9   | 2.66E-05 | 0.000375 | ENSMUSG0000000365 | Card11     | protein_codi | 140872990 | 141000582 | inside       | 8070   | 7724   | shortestDistance |
| chr5 | 141004194 | 141004765 | 572  | 1.46  | 8.16E-05 | 0.000941 | ENSMUSG0000000365 | Card11     | protein_codi | 140872990 | 141000582 | upstream     | -3898  | 3612   | shortestDistance |
| chr5 | 141055678 | 141056550 | 873  | 0.81  | 0.0119   | 0.0483   | ENSMUSG0000000934 | Gm26113    | miRNA        | 141080431 | 141080509 | upstream     | -24317 | 23881  | shortestDistance |
| chr5 | 141062035 | 141062827 | 793  | 0.88  | 0.0054   | 0.0265   | ENSMUSG0000000934 | Gm26113    | miRNA        | 141080431 | 141080509 | upstream     | -18000 | 17604  | shortestDistance |
| chr5 | 141080928 | 141081313 | 386  | 1.4   | 0.000288 | 0.00615  | ENSMUSG0000000934 | Gm26113    | miRNA        | 141080431 | 141080509 | downstream   | 689    | 419    | shortestDistance |
| chr5 | 141824671 | 141825373 | 703  | 1.67  | 0.000254 | 0.00024  | ENSMUSG0000000396 | Sdk1       | protein_codi | 141241490 | 142215586 | inside       | 583532 | 390213 | shortestDistance |
| chr5 | 142018187 | 142018697 | 511  | 2.09  | 3.45E-06 | 6.70E-05 | ENSMUSG0000000396 | Sdk1       | protein_codi | 141241490 | 142215586 | inside       | 776952 | 196889 | shortestDistance |
| chr5 | 142325020 | 142325389 | 370  | 1.26  | 0.00547  | 0.0267   | ENSMUSG0000000979 | Gm26970    | processed_g  | 142283106 | 142284069 | downstream   | 42098  | 40951  | shortestDistance |
| chr5 | 142367052 | 142368163 | 1112 | 0.88  | 0.00497  | 0.0248   | ENSMUSG0000000564 | Foxk1      | protein_codi | 142401497 | 142462011 | upstream     | -33889 | 33334  | shortestDistance |
| chr5 | 142380367 | 142380995 | 629  | 2.36  | 2.67E-09 | 1.49E-07 | ENSMUSG0000000564 | Foxk1      | protein_codi | 142401497 | 142462011 | upstream     | -20816 | 20502  | shortestDistance |
| chr5 | 142385323 | 142385702 | 380  | 2.73  | 5.98E-08 | 2.16E-06 | ENSMUSG0000000564 | Foxk1      | protein_codi | 142401497 | 142462011 | upstream     | -15985 | 15795  | shortestDistance |
| chr5 | 142386889 | 142387185 | 297  | 1.65  | 0.00011  | 0.0012   | ENSMUSG0000000564 | Foxk1      | protein_codi | 142401497 | 142462011 | upstream     | -14460 | 14312  | shortestDistance |
| chr5 | 142387792 | 142388038 | 247  | 2.02  | 3.50E-06 | 6.78E-05 | ENSMUSG0000000564 | Foxk1      | protein_codi | 142401497 | 142462011 | upstream     | -13582 | 13459  | shortestDistance |
| chr5 | 142401245 | 142402149 | 905  | 0.92  | 0.00486  | 0.0243   | ENSMUSG0000000564 | Foxk1      | protein_codi | 142401497 | 142462011 | overlapStart | 200    | 252    | shortestDistance |
| chr5 | 142412967 | 142413361 | 395  | 1.87  | 1.83E-05 | 0.000274 | ENSMUSG0000000564 | Foxk1      | protein_codi | 142401497 | 142462011 | inside       | 11667  | 11470  | shortestDistance |
| chr5 | 142443484 | 142443940 | 457  | 1.98  | 7.89E-07 | 1.92E-05 | ENSMUSG0000000564 | Foxk1      | protein_codi | 142401497 | 142462011 | inside       | 42215  | 18071  | shortestDistance |
| chr5 | 142457720 | 142457725 | 456  | 1.15  | 0.0102   | 0.0432   | ENSMUSG0000000564 | Foxk1      | protein_codi | 142401497 | 142462011 | inside       | 56001  | 4286   | shortestDistance |
| chr5 | 142463523 | 142464358 | 836  | 0.89  | 0.00474  | 0.0239   | ENSMUSG0000000396 | Aps21      | protein_codi | 142463944 | 142478710 | overlapStart | -4     | 414    | shortestDistance |
| chr5 | 142478834 | 142479120 | 287  | 1.3   | 0.00128  | 0.00866  | ENSMUSG0000000396 | Aps21      | protein_codi | 142463944 | 142478710 | downstream   | 15033  | 124    | shortestDistance |
| chr5 | 142499026 | 142499930 | 365  | 1.1   | 0.00329  | 0.018    | ENSMUSG0000000295 | Radl1      | protein_codi | 142484839 | 142551098 | inside       | 51890  | 14187  | shortestDistance |
| chr5 | 142550336 | 142551439 | 1104 | 0.84  | 0.00634  | 0.0299   | ENSMUSG0000000295 | Radl1      | protein_codi | 142484839 | 142551098 | overlapStart | 210    | 341    | shortestDistance |
| chr5 | 142718085 | 142718398 | 314  | 1.61  |          |          |                   |            |              |           |           |              |        |        |                  |

|      |           |           |      |       |          |          |                    |               |              |           |           |              |        |        |                  |
|------|-----------|-----------|------|-------|----------|----------|--------------------|---------------|--------------|-----------|-----------|--------------|--------|--------|------------------|
| chr5 | 146596608 | 146597185 | 578  | 1.63  | 0.000101 | 0.00112  | ENSMUSG0000010590  | Gm34333       | lincRNA      | 146586645 | 146600102 | inside       | 3206   | 2917   | shortestDistance |
| chr5 | 146676405 | 146676970 | 566  | 0.95  | 0.00496  | 0.0247   | ENSMUSG0000010602  | 4930573C15F   | lincRNA      | 146706622 | 146707496 | upstream     | -29934 | 29652  | shortestDistance |
| chr5 | 146823828 | 146824147 | 320  | 1.22  | 0.00147  | 0.00965  | ENSMUSG0000004145  | Rpl21         | protein_codi | 146832890 | 146837032 | upstream     | -8902  | 8743   | shortestDistance |
| chr5 | 146896926 | 146897472 | 547  | 1.16  | 0.00226  | 0.0135   | ENSMUSG0000002964  | Rasl11a       | protein_codi | 146845071 | 146847726 | downstream   | 52128  | 49200  | shortestDistance |
| chr5 | 146940182 | 146940591 | 410  | 1.69  | 0.000408 | 0.00351  | ENSMUSG0000001650  | Gtf3a         | protein_codi | 146948657 | 146955614 | upstream     | -8271  | 8066   | shortestDistance |
| chr5 | 146973941 | 146974402 | 462  | 2.34  | 4.10E-06 | 7.74E-05 | ENSMUSG0000001651  | Mtf13         | protein_codi | 146951573 | 146963800 | upstream     | -10372 | 10141  | shortestDistance |
| chr5 | 147059317 | 147059683 | 367  | 1.05  | 0.00775  | 0.0341   | ENSMUSG0000001652  | Lnx2          | protein_codi | 147016655 | 147076586 | inside       | 17086  | 16903  | shortestDistance |
| chr5 | 147070688 | 147071171 | 484  | 1.29  | 0.0119   | 0.0485   | ENSMUSG0000001652  | Lnx2          | protein_codi | 147016655 | 147076586 | inside       | 5656   | 5415   | shortestDistance |
| chr5 | 147269915 | 147270364 | 450  | -0.93 | 0.00939  | 0.0405   | ENSMUSG0000002964  | Pdx1          | protein_codi | 147269959 | 147275848 | overlapStart | 181    | 44     | shortestDistance |
| chr5 | 147315137 | 147315748 | 612  | -1.2  | 0.000303 | 0.00276  | ENSMUSG0000002964  | Urad          | protein_codi | 147314984 | 147322440 | inside       | 6998   | 153    | shortestDistance |
| chr5 | 147331584 | 147332109 | 526  | 0.98  | 0.0114   | 0.0468   | ENSMUSG0000004281  | Flt13         | protein_codi | 147330741 | 147400489 | inside       | 68643  | 843    | shortestDistance |
| chr5 | 147339525 | 147340050 | 526  | 1.43  | 8.69E-05 | 0.000989 | ENSMUSG0000002964  | Mtus2         | protein_codi | 147330741 | 147400489 | inside       | 60701  | 8784   | shortestDistance |
| chr5 | 147388708 | 147389486 | 779  | 2.47  | 1.61E-11 | 1.98E-09 | ENSMUSG0000004281  | Flt13         | protein_codi | 147330741 | 147400489 | inside       | 11392  | 11003  | shortestDistance |
| chr5 | 147392569 | 147393256 | 688  | 1.11  | 0.0041   | 0.0214   | ENSMUSG0000004281  | Flt13         | protein_codi | 147330741 | 147400489 | inside       | 7577   | 7233   | shortestDistance |
| chr5 | 147430932 | 147431441 | 510  | 1     | 0.00604  | 0.0288   | ENSMUSG0000002964  | Pan3          | protein_codi | 147430161 | 147548502 | inside       | 1025   | 771    | shortestDistance |
| chr5 | 147511409 | 147511746 | 338  | 2.13  | 9.39E-06 | 0.000157 | ENSMUSG0000002964  | Pan3          | protein_codi | 147430161 | 147548502 | inside       | 81417  | 36756  | shortestDistance |
| chr5 | 147539823 | 147540202 | 380  | 1.22  | 0.00332  | 0.0181   | ENSMUSG0000002964  | Pan3          | protein_codi | 147430161 | 147548502 | inside       | 109851 | 8300   | shortestDistance |
| chr5 | 147574425 | 147575049 | 625  | 0.97  | 0.00393  | 0.0207   | ENSMUSG0000002964  | Flt1          | protein_codi | 147561604 | 147726011 | inside       | 151274 | 12821  | shortestDistance |
| chr5 | 147700962 | 147701405 | 444  | 3.21  | 2.56E-12 | 4.05E-10 | ENSMUSG0000002964  | Flt1          | protein_codi | 147561604 | 147726011 | inside       | 24827  | 24606  | shortestDistance |
| chr5 | 147702391 | 147702829 | 439  | 4.12  | 4.58E-16 | 3.40E-13 | ENSMUSG0000002964  | Flt1          | protein_codi | 147561604 | 147726011 | inside       | 23401  | 23182  | shortestDistance |
| chr5 | 147742493 | 147743063 | 571  | 2.7   | 2.74E-09 | 1.52E-07 | ENSMUSG0000010684  | Gm43156       | lincRNA      | 147745516 | 147749176 | upstream     | -2738  | 2453   | shortestDistance |
| chr5 | 147747939 | 147748634 | 696  | 1.61  | 1.63E-06 | 3.53E-05 | ENSMUSG0000010684  | Gm43156       | lincRNA      | 147745516 | 147749176 | inside       | 2770   | 54     | shortestDistance |
| chr5 | 147757896 | 147759264 | 1369 | 1.33  | 2.72E-05 | 0.000381 | ENSMUSG0000010684  | Gm43156       | lincRNA      | 147745516 | 147749176 | downstream   | 13064  | 8720   | shortestDistance |
| chr5 | 147839371 | 147839875 | 505  | 2.42  | 2.89E-08 | 1.17E-06 | ENSMUSG0000010706  | Gm43155       | processed_p  | 147822245 | 147822738 | downstream   | 17378  | 16633  | shortestDistance |
| chr5 | 148293410 | 148293664 | 255  | 2.13  | 2.74E-05 | 0.000383 | ENSMUSG0000002964  | Mtus2         | protein_codi | 147957320 | 148316065 | inside       | 336217 | 22401  | shortestDistance |
| chr5 | 148363669 | 148364263 | 595  | 2.86  | 2.34E-09 | 1.34E-07 | ENSMUSG0000004131  | Sc1a7         | protein_codi | 148327410 | 148399904 | inside       | 35938  | 35641  | shortestDistance |
| chr5 | 148645186 | 148645808 | 623  | -1.71 | 1.35E-05 | 0.000212 | ENSMUSG00000010709 | Gm29815       | processed_p  | 148613467 | 148613644 | upstream     | -31853 | 31542  | shortestDistance |
| chr5 | 148649465 | 148649945 | 481  | 1.32  | 0.0012   | 0.00824  | ENSMUSG0000010709  | Gm29815       | processed_p  | 148613467 | 148613644 | upstream     | -36061 | 35821  | shortestDistance |
| chr5 | 148674031 | 148674649 | 619  | 1     | 0.00412  | 0.0215   | ENSMUSG0000010673  | Gm36186       | lincRNA      | 148711466 | 148718397 | upstream     | -37126 | 36817  | shortestDistance |
| chr5 | 148678410 | 148678997 | 588  | 1.25  | 0.00281  | 0.016    | ENSMUSG0000010673  | Gm36186       | lincRNA      | 148711466 | 148718397 | upstream     | -32762 | 32469  | shortestDistance |
| chr5 | 148728511 | 148728847 | 337  | -1.02 | 0.008    | 0.0358   | ENSMUSG0000010673  | Gm36186       | lincRNA      | 148711466 | 148718397 | downstream   | 17213  | 10114  | shortestDistance |
| chr5 | 148739066 | 148739620 | 555  | 1.34  | 5.53E-05 | 0.000687 | ENSMUSG0000008649  | 2210417A021   | lincRNA      | 148741840 | 148743139 | upstream     | -2497  | 2220   | shortestDistance |
| chr5 | 148794228 | 148794759 | 532  | 1.03  | 0.00645  | 0.0303   | ENSMUSG0000008649  | 2210417A021   | lincRNA      | 148777963 | 148783080 | downstream   | 16531  | 11148  | shortestDistance |
| chr5 | 148804070 | 148805433 | 464  | 1.85  | 1.15E-05 | 0.000186 | ENSMUSG0000008764  | Gm15407       | lincRNA      | 148820767 | 148837798 | upstream     | -15565 | 15334  | shortestDistance |
| chr5 | 148831015 | 148832181 | 1167 | 1.29  | 8.86E-05 | 0.00101  | ENSMUSG0000008764  | Gm15407       | lincRNA      | 148820767 | 148837798 | inside       | 10831  | 5617   | shortestDistance |
| chr5 | 148867810 | 148868055 | 246  | -1.22 | 0.00488  | 0.0244   | ENSMUSG0000004129  | Katnal1       | protein_codi | 148871584 | 148929320 | downstream   | 61388  | 3529   | shortestDistance |
| chr5 | 148910192 | 148910413 | 222  | -1.22 | 0.00354  | 0.0191   | ENSMUSG0000004129  | Katnal1       | protein_codi | 148871584 | 148929320 | inside       | 19018  | 18907  | shortestDistance |
| chr5 | 149088913 | 149089305 | 393  | 1.1   | 0.00917  | 0.0397   | ENSMUSG0000006655  | Hmgb1         | protein_codi | 149046702 | 149184489 | inside       | 95380  | 42211  | shortestDistance |
| chr5 | 149183384 | 149184839 | 1006 | 0.76  | 0.0093   | 0.0402   | ENSMUSG0000006655  | Hmgb1         | protein_codi | 149046702 | 149184489 | overlapStart | 153    | 350    | shortestDistance |
| chr5 | 149235002 | 149235492 | 491  | 1.14  | 0.00305  | 0.017    | ENSMUSG0000010078  | 2310047D0071  | lincRNA      | 149231332 | 149237984 | inside       | 3915   | 2492   | shortestDistance |
| chr5 | 149267495 | 149267856 | 362  | 1.23  | 0.000440 | 0.00349  | ENSMUSG0000006006  | AloxSap       | protein_codi | 149264767 | 149288153 | inside       | 2909   | 2728   | shortestDistance |
| chr5 | 149272440 | 149273003 | 564  | 2.16  | 7.25E-07 | 1.79E-05 | ENSMUSG0000006006  | AloxSap       | protein_codi | 149264767 | 149288153 | inside       | 7955   | 7673   | shortestDistance |
| chr5 | 149274452 | 149275360 | 909  | 1.55  | 1.62E-05 | 0.000248 | ENSMUSG0000006006  | AloxSap       | protein_codi | 149264767 | 149288153 | inside       | 10139  | 9685   | shortestDistance |
| chr5 | 149446521 | 149447111 | 591  | 2.97  | 4.10E-11 | 4.33E-09 | ENSMUSG0000002966  | Tex26         | protein_codi | 149439660 | 149470979 | inside       | 7156   | 6861   | shortestDistance |
| chr5 | 149535807 | 149536330 | 524  | -1.06 | 0.00653  | 0.0306   | ENSMUSG0000010713  | Gm15997       | antisense_RI | 149489056 | 149538030 | inside       | 1962   | 1700   | shortestDistance |
| chr5 | 149647880 | 149648624 | 745  | -1.96 | 1.00E-06 | 2.35E-05 | ENSMUSG0000010667  | Gm20005       | lincRNA      | 149641610 | 149647790 | downstream   | 6642   | 90     | shortestDistance |
| chr5 | 149857018 | 149857375 | 358  | 1.17  | 0.00458  | 0.0233   | ENSMUSG0000010721  | 4930505K04F04 | processed_tr | 149847747 | 149864280 | inside       | 9449   | 6905   | shortestDistance |
| chr5 | 150116729 | 150116978 | 250  | 0.97  | 0.00739  | 0.0337   | ENSMUSG0000005660  | Fry           | protein_codi | 150118645 | 150497753 | upstream     | -1791  | 1667   | shortestDistance |
| chr5 | 150140442 | 150141060 | 619  | 1.65  | 0.000675 | 0.00524  | ENSMUSG0000005660  | Fry           | protein_codi | 150118645 | 150497753 | inside       | 22106  | 21797  | shortestDistance |
| chr5 | 150155450 | 150155995 | 546  | 1.32  | 0.00265  | 0.0153   | ENSMUSG0000005660  | Fry           | protein_codi | 150118645 | 150497753 | inside       | 37077  | 36805  | shortestDistance |
| chr5 | 150215990 | 150216580 | 591  | 2.86  | 2.90E-12 | 4.54E-10 | ENSMUSG0000005660  | Fry           | protein_codi | 150118645 | 150497753 | inside       | 97640  | 97345  | shortestDistance |
| chr5 | 150232162 | 150232670 | 509  | 3.86  | 3.73E-19 | 1.31E-15 | ENSMUSG0000005660  | Fry           | protein_codi | 150118645 | 150497753 | inside       | 113771 | 113517 | shortestDistance |
| chr5 | 150262681 | 150263092 | 412  | 1.16  | 0.00066  | 0.00514  | ENSMUSG0000005660  | Fry           | protein_codi | 150118645 | 150497753 | inside       | 144241 | 144036 | shortestDistance |
| chr5 | 150279388 | 150279786 | 399  | -1.17 | 0.00188  | 0.0117   | ENSMUSG0000005660  | Fry           | protein_codi | 150118645 | 150497753 | inside       | 160942 | 160743 | shortestDistance |
| chr5 | 150384334 | 150384621 | 288  | 2.02  | 0.000121 | 0.0013   | ENSMUSG0000005660  | Fry           | protein_codi | 150118645 | 150497753 | inside       | 265833 | 113132 | shortestDistance |
| chr5 | 150583633 | 150584550 | 918  | 2.94  | 8.38E-14 | 2.38E-11 | ENSMUSG0000004113  | N4bp21        | protein_codi | 150571644 | 150597188 | inside       | 13096  | 11989  | shortestDistance |
| chr5 | 150595392 | 150595805 | 414  | 1.02  | 0.00928  | 0.0401   | ENSMUSG0000004113  | N4bp21        | protein_codi | 150571644 | 150597188 | inside       | 1590   | 1383   | shortestDistance |
| chr5 | 151056863 | 151057407 | 545  | 1.22  | 0.00222  | 0.0134   | ENSMUSG0000001612  | Star13        | protein_codi | 151037510 | 151233836 | inside       | 176701 | 19353  | shortestDistance |
| chr5 | 151104614 | 151105002 | 389  | -1.18 | 0.000449 | 0.00379  | ENSMUSG0000001612  | Star13        | protein_codi | 151037510 | 151233836 | inside       | 129028 | 67104  | shortestDistance |
| chr5 | 151183357 | 151184015 | 659  | -1.02 | 0.00315  | 0.0175   | ENSMUSG0000001612  | Star13        | protein_codi | 151037510 | 151233836 | inside       | 50150  | 49821  | shortestDistance |
| chr5 | 151189687 | 151190498 | 812  | -0.94 | 0.0029   | 0.0164   | ENSMUSG0000001612  | Star13        | protein_codi | 151037510 | 151233836 | inside       | 43744  | 43338  | shortestDistance |
| chr5 | 151190817 | 151191116 | 300  | -1.36 | 0.000185 | 0.00186  | ENSMUSG0000001612  | Star13        | protein_codi | 151037510 | 151233836 | inside       | 42870  | 42720  | shortestDistance |
| chr5 | 151247014 | 151247732 | 719  | -1.32 | 1.61E-05 | 0.000247 | ENSMUSG0000010701  | Gm42906       | protein_codi | 151063546 | 151428163 | inside       | 180790 | 180431 | shortestDistance |
| chr6 | 3183837   | 3184168   | 332  | -1.08 | 0.00391  | 0.0206   | ENSMUSG0000010718  | Gm42642       | processed_p  | 3182630   | 3182984   | upstream     | -1018  | 853    | shortestDistance |
| chr6 | 3200953   | 3201643   | 691  | 1.07  | 0.00752  | 0.0341   | ENSMUSG0000010760  | Gm2651        | processed_p  | 3207869   | 3208706   | upstream     | -6571  | 6226   | shortestDistance |
| chr6 | 3343571   | 3343874   | 304  | -1.25 | 0.000855 | 0.00631  | ENSMUSG0000010673  | Gm20559       | processed_tr | 3333194   | 3346128   | inside       | 2406   | 2254   | shortestDistance |
| chr6 | 3386130   | 3386419   | 290  | -1.17 | 0.00182  | 0.0115   | ENSMUSG0000004773  | Samd9l        | protein_codi | 3372257   | 3399572   | inside       | 13298  | 13153  | shortestDistance |
| chr6 | 3426885   | 3427479   | 595  | -0.88 | 0.00675  | 0.0314   | ENSMUSG0000004773  | Samd9l        | protein_codi | 3372257   | 3399572   | upstream     | -27610 | 27313  | shortestDistance |
| chr6 | 3496279   | 3496528   | 250  | -1.21 | 0.00083  | 0.00616  | ENSMUSG0000004415  | Hepacam2      | protein_codi | 3457096   | 3498298   | inside       | 1894   | 1770   | shortestDistance |
| chr6 | 3498019   | 3498800   | 782  | -1.02 | 0.000604 | 0.004    |                    |               |              |           |           |              |        |        |                  |

|      |          |          |      |       |          |          |                    |            |              |          |          |              |         |        |                  |
|------|----------|----------|------|-------|----------|----------|--------------------|------------|--------------|----------|----------|--------------|---------|--------|------------------|
| chr6 | 4978325  | 4978637  | 313  | 1.48  | 0.000103 | 0.00114  | ENSMUSG0000003282  | Ppp1r9a    | protein_codi | 4902917  | 5165661  | inside       | 75564   | 75408  | shortestDistance |
| chr6 | 5052165  | 5052791  | 627  | -1.45 | 1.10E-05 | 0.000178 | ENSMUSG0000003282  | Ppp1r9a    | protein_codi | 4902917  | 5165661  | inside       | 149561  | 112870 | shortestDistance |
| chr6 | 5110374  | 5110905  | 532  | -0.88 | 0.00781  | 0.0352   | ENSMUSG0000003282  | Ppp1r9a    | protein_codi | 4902917  | 5165661  | inside       | 207723  | 54756  | shortestDistance |
| chr6 | 5174236  | 5174807  | 572  | 1.39  | 3.17E-05 | 0.000433 | ENSMUSG0000000258  | Pon1       | protein_codi | 5168090  | 5193946  | inside       | 19424   | 6146   | shortestDistance |
| chr6 | 5233819  | 5234105  | 287  | 3.67  | 3.50E-10 | 2.63E-08 | ENSMUSG0000002975  | Pon3       | protein_codi | 5220852  | 5256286  | inside       | 22324   | 12967  | shortestDistance |
| chr6 | 5269241  | 5269490  | 250  | 1.83  | 0.00147  | 0.00965  | ENSMUSG0000003266  | Pon2       | protein_codi | 5264147  | 5298455  | inside       | 29089   | 5094   | shortestDistance |
| chr6 | 5291122  | 5291993  | 872  | -1    | 0.00408  | 0.0213   | ENSMUSG0000003266  | Pon2       | protein_codi | 5264147  | 5298455  | inside       | 6897    | 6462   | shortestDistance |
| chr6 | 5339251  | 5339691  | 441  | 4.32  | 5.33E-15 | 2.50E-12 | ENSMUSG0000003266  | Pon2       | protein_codi | 5264147  | 5298455  | upstream     | -41016  | 40796  | shortestDistance |
| chr6 | 5382579  | 5383257  | 679  | -1.04 | 0.000856 | 0.00631  | ENSMUSG0000004260  | Asb4       | protein_codi | 5383386  | 5433022  | upstream     | -468    | 129    | shortestDistance |
| chr6 | 5383599  | 5383882  | 284  | -1.15 | 0.00072  | 0.0055   | ENSMUSG0000004260  | Asb4       | protein_codi | 5383386  | 5433022  | inside       | 354     | 213    | shortestDistance |
| chr6 | 5390116  | 5390706  | 591  | -1.14 | 0.00148  | 0.00969  | ENSMUSG0000004260  | Asb4       | protein_codi | 5383386  | 5433022  | inside       | 7025    | 6730   | shortestDistance |
| chr6 | 5401390  | 5402134  | 745  | -1.12 | 0.000601 | 0.00478  | ENSMUSG0000004260  | Asb4       | protein_codi | 5383386  | 5433022  | inside       | 18376   | 18004  | shortestDistance |
| chr6 | 5413271  | 5413745  | 475  | -1.09 | 0.00545  | 0.0267   | ENSMUSG0000004260  | Asb4       | protein_codi | 5383386  | 5433022  | inside       | 30122   | 19277  | shortestDistance |
| chr6 | 5442487  | 5443119  | 633  | -2.09 | 1.32E-09 | 8.13E-08 | ENSMUSG0000004260  | Asb4       | protein_codi | 5383386  | 5433022  | downstream   | 59417   | 9465   | shortestDistance |
| chr6 | 5443192  | 5443490  | 299  | -1.96 | 8.03E-06 | 0.000137 | ENSMUSG0000004260  | Asb4       | protein_codi | 5383386  | 5433022  | downstream   | 59955   | 10170  | shortestDistance |
| chr6 | 5495866  | 5497089  | 1224 | -1.83 | 5.03E-07 | 1.31E-05 | ENSMUSG0000001957  | Pdk4       | protein_codi | 5483351  | 5496309  | overlapStart | -169    | 443    | shortestDistance |
| chr6 | 5509441  | 5510233  | 793  | -1.34 | 4.43E-05 | 0.000572 | ENSMUSG0000001957  | Pdk4       | protein_codi | 5483351  | 5496309  | upstream     | -13528  | 13132  | shortestDistance |
| chr6 | 5583029  | 5583356  | 328  | -1.46 | 0.000667 | 0.00519  | ENSMUSG0000001957  | Pdk4       | protein_codi | 5483351  | 5496309  | upstream     | -86883  | 86720  | shortestDistance |
| chr6 | 5637405  | 5637662  | 258  | -1.41 | 0.00178  | 0.0113   | ENSMUSG0000002975  | Dync11     | protein_codi | 5725639  | 6028039  | upstream     | -88105  | 87977  | shortestDistance |
| chr6 | 5639698  | 5639977  | 280  | -1.31 | 0.000966 | 0.00695  | ENSMUSG0000002975  | Dync11     | protein_codi | 5725639  | 6028039  | upstream     | -85801  | 85662  | shortestDistance |
| chr6 | 5645439  | 5645795  | 357  | -1.08 | 0.00375  | 0.0199   | ENSMUSG0000002975  | Dync11     | protein_codi | 5725639  | 6028039  | upstream     | -80022  | 79844  | shortestDistance |
| chr6 | 5725529  | 5726755  | 1227 | -1.4  | 9.67E-05 | 0.00108  | ENSMUSG0000002975  | Dync11     | protein_codi | 5725639  | 6028039  | overlapStart | 503     | 110    | shortestDistance |
| chr6 | 6005675  | 6006506  | 832  | -0.88 | 0.00649  | 0.0305   | ENSMUSG0000002975  | Dync11     | protein_codi | 5725639  | 6028039  | inside       | 280451  | 21533  | shortestDistance |
| chr6 | 6043257  | 6043473  | 217  | -1.58 | 0.00228  | 0.0136   | ENSMUSG0000001511  | Slc25a13   | protein_codi | 6041218  | 6217173  | inside       | 173808  | 2039   | shortestDistance |
| chr6 | 6077183  | 6077661  | 479  | -1.36 | 0.000149 | 0.00155  | ENSMUSG0000001511  | Slc25a13   | protein_codi | 6041218  | 6217173  | inside       | 139751  | 35965  | shortestDistance |
| chr6 | 6189102  | 6189430  | 329  | -3.49 | 2.66E-07 | 7.68E-06 | ENSMUSG0000001511  | Slc25a13   | protein_codi | 6041218  | 6217173  | inside       | 27907   | 27743  | shortestDistance |
| chr6 | 6192421  | 6192867  | 447  | -1.92 | 6.97E-06 | 0.000122 | ENSMUSG0000001511  | Slc25a13   | protein_codi | 6041218  | 6217173  | inside       | 24529   | 24306  | shortestDistance |
| chr6 | 6233167  | 6233806  | 640  | -2.06 | 3.98E-07 | 1.08E-05 | ENSMUSG0000009348  | Gm20619    | lincRNA      | 6248659  | 6378675  | upstream     | -15173  | 14853  | shortestDistance |
| chr6 | 6263260  | 6263893  | 634  | -1.09 | 0.000747 | 0.00566  | ENSMUSG0000009348  | Gm20619    | lincRNA      | 6248659  | 6378675  | inside       | 14917   | 14601  | shortestDistance |
| chr6 | 6496329  | 6497262  | 934  | 2.02  | 1.61E-06 | 3.51E-05 | ENSMUSG0000009348  | Gm20619    | lincRNA      | 6483022  | 6508616  | inside       | 13774   | 11354  | shortestDistance |
| chr6 | 6859655  | 6860049  | 395  | -1.62 | 1.94E-06 | 4.11E-05 | ENSMUSG0000009006  | Dlx6os1    | antisense_RI | 6820189  | 6871592  | inside       | 11740   | 11543  | shortestDistance |
| chr6 | 6860344  | 6860937  | 594  | -1.24 | 9.35E-05 | 0.00105  | ENSMUSG0000009006  | Dlx6os1    | antisense_RI | 6820189  | 6871592  | inside       | 10952   | 10655  | shortestDistance |
| chr6 | 6861109  | 6861441  | 333  | -1.57 | 1.34E-05 | 0.000211 | ENSMUSG0000009006  | Dlx6os1    | antisense_RI | 6820189  | 6871592  | inside       | 10317   | 10151  | shortestDistance |
| chr6 | 6863452  | 6864197  | 746  | -0.97 | 0.00163  | 0.0105   | ENSMUSG0000002975  | Dlx6       | protein_codi | 6863334  | 6868568  | inside       | 490     | 118    | shortestDistance |
| chr6 | 6884976  | 6885317  | 342  | -1.16 | 0.00871  | 0.0382   | ENSMUSG0000002975  | Dlx6       | protein_codi | 6877805  | 6882085  | upstream     | -3061   | 2891   | shortestDistance |
| chr6 | 6914841  | 6915065  | 225  | -1.25 | 0.0036   | 0.0193   | ENSMUSG0000006577  | Gm22155    | snRNA        | 6924118  | 6924279  | downstream   | 9326    | 9053   | shortestDistance |
| chr6 | 6915196  | 6915935  | 740  | -1.17 | 0.000546 | 0.00442  | ENSMUSG0000006577  | Gm22155    | snRNA        | 6924118  | 6924279  | downstream   | 8713    | 8183   | shortestDistance |
| chr6 | 6955456  | 6956641  | 1186 | -0.9  | 0.00203  | 0.0125   | ENSMUSG0000004250  | Shaf3      | protein_codi | 6956004  | 7042979  | overlapStart | 44      | 548    | shortestDistance |
| chr6 | 7554784  | 7555641  | 858  | -1.67 | 5.66E-06 | 0.000102 | ENSMUSG0000006176  | Tac1       | protein_codi | 7554879  | 7565834  | overlapStart | 333     | 95     | shortestDistance |
| chr6 | 7555719  | 7556090  | 372  | -1.74 | 4.17E-05 | 0.000544 | ENSMUSG0000006176  | Tac1       | protein_codi | 7554879  | 7565834  | inside       | 1025    | 840    | shortestDistance |
| chr6 | 7600244  | 7600837  | 594  | -1.62 | 8.02E-05 | 0.000929 | ENSMUSG0000006176  | Tac1       | protein_codi | 7554879  | 7565834  | downstream   | 45661   | 34410  | shortestDistance |
| chr6 | 7661415  | 7662014  | 600  | -0.95 | 0.0101   | 0.0428   | ENSMUSG0000002975  | Asns       | protein_codi | 7675169  | 7693254  | downstream   | 31540   | 13155  | shortestDistance |
| chr6 | 7737873  | 7738294  | 422  | 2.99  | 5.51E-12 | 7.94E-10 | ENSMUSG00000010739 | L70001215F | lincRNA      | 7766394  | 7777681  | upstream     | -28310  | 28100  | shortestDistance |
| chr6 | 7856874  | 7857213  | 340  | -1.43 | 1.63E-05 | 0.000249 | ENSMUSG0000004246  | C1galt1    | protein_codi | 7844842  | 7875687  | inside       | 12202   | 12032  | shortestDistance |
| chr6 | 7983674  | 7983995  | 322  | -1.12 | 0.00179  | 0.0113   | ENSMUSG0000006940  | Gm9825     | processed_p  | 7982541  | 7983383  | upstream     | -451    | 291    | shortestDistance |
| chr6 | 8067132  | 8067484  | 353  | -1.04 | 0.00639  | 0.0301   | ENSMUSG0000006879  | Col28a1    | protein_codi | 7997808  | 8192617  | inside       | 125309  | 69324  | shortestDistance |
| chr6 | 8068270  | 8068842  | 573  | -1.04 | 0.00113  | 0.00789  | ENSMUSG0000006879  | Col28a1    | protein_codi | 7997808  | 8192617  | inside       | 124061  | 70462  | shortestDistance |
| chr6 | 8094504  | 8094743  | 240  | -1.18 | 0.00237  | 0.0141   | ENSMUSG0000006879  | Col28a1    | protein_codi | 7997808  | 8192617  | inside       | 97993   | 96696  | shortestDistance |
| chr6 | 8178666  | 8178927  | 262  | -1.19 | 0.0095   | 0.0408   | ENSMUSG0000006879  | Col28a1    | protein_codi | 7997808  | 8192617  | inside       | 13821   | 13690  | shortestDistance |
| chr6 | 8188886  | 8189198  | 313  | -1.01 | 0.00708  | 0.0326   | ENSMUSG0000006879  | Col28a1    | protein_codi | 7997808  | 8192617  | inside       | 3575    | 3419   | shortestDistance |
| chr6 | 8258842  | 8259961  | 1120 | -0.81 | 0.00716  | 0.0328   | ENSMUSG0000008986  | Umad1      | protein_codi | 8259288  | 8459470  | overlapStart | 114     | 446    | shortestDistance |
| chr6 | 8274277  | 8274880  | 604  | -0.9  | 0.00489  | 0.0242   | ENSMUSG00000010770 | Gm45062    | protein_codi | 8259450  | 8597480  | inside       | 15128   | 14827  | shortestDistance |
| chr6 | 8275136  | 8275439  | 304  | -1.31 | 0.000492 | 0.00412  | ENSMUSG00000010770 | Gm45062    | protein_codi | 8259450  | 8597480  | inside       | 15838   | 15686  | shortestDistance |
| chr6 | 8285428  | 8285918  | 491  | -2.15 | 1.19E-05 | 0.000191 | ENSMUSG00000010770 | Gm45062    | protein_codi | 8259450  | 8597480  | inside       | 26223   | 25978  | shortestDistance |
| chr6 | 8339419  | 8339992  | 574  | -1.5  | 1.90E-06 | 4.02E-05 | ENSMUSG00000010770 | Gm45062    | protein_codi | 8259450  | 8597480  | inside       | 80256   | 79969  | shortestDistance |
| chr6 | 8345452  | 8345965  | 514  | -1.33 | 6.44E-05 | 0.00078  | ENSMUSG00000010770 | Gm45062    | protein_codi | 8259450  | 8597480  | inside       | 86258   | 86002  | shortestDistance |
| chr6 | 8427460  | 8428084  | 625  | -0.98 | 0.00424  | 0.0219   | ENSMUSG0000009015  | Gm16043    | antisense_RI | 8420009  | 8443455  | inside       | 15683   | 7451   | shortestDistance |
| chr6 | 8623037  | 8623391  | 355  | -3.15 | 1.55E-10 | 1.33E-08 | ENSMUSG0000006299  | Ica1       | protein_codi | 8630527  | 8778488  | downstream   | 155274  | 7136   | shortestDistance |
| chr6 | 8736007  | 8736495  | 489  | -0.98 | 0.00299  | 0.0168   | ENSMUSG0000006299  | Ica1       | protein_codi | 8630527  | 8778488  | inside       | 42237   | 41993  | shortestDistance |
| chr6 | 8744298  | 8744889  | 592  | -1.56 | 0.000212 | 0.00207  | ENSMUSG0000006299  | Ica1       | protein_codi | 8630527  | 8778488  | inside       | 33894   | 33599  | shortestDistance |
| chr6 | 8777338  | 8778677  | 1340 | -0.85 | 0.0103   | 0.0433   | ENSMUSG0000006299  | Ica1       | protein_codi | 8630527  | 8778488  | overlapStart | 480     | 189    | shortestDistance |
| chr6 | 8831260  | 8831571  | 312  | -1.13 | 0.00163  | 0.0105   | ENSMUSG0000006299  | Ica1       | protein_codi | 8630527  | 8778488  | upstream     | -52928  | 52772  | shortestDistance |
| chr6 | 8935757  | 8936085  | 329  | -1.23 | 0.00255  | 0.0148   | ENSMUSG0000004617  | Nxph1      | protein_codi | 8948431  | 9249032  | upstream     | -12510  | 12346  | shortestDistance |
| chr6 | 8948205  | 8949410  | 1206 | -1.05 | 0.00108  | 0.00756  | ENSMUSG0000004617  | Nxph1      | protein_codi | 8948431  | 9249032  | overlapStart | 377     | 226    | shortestDistance |
| chr6 | 8949617  | 8950025  | 409  | -1.6  | 1.00E-05 | 0.000165 | ENSMUSG0000004617  | Nxph1      | protein_codi | 8948431  | 9249032  | inside       | 1390    | 1186   | shortestDistance |
| chr6 | 8951384  | 8951697  | 314  | -1.47 | 8.38E-05 | 0.000961 | ENSMUSG0000004617  | Nxph1      | protein_codi | 8948431  | 9249032  | inside       | 3109    | 2953   | shortestDistance |
| chr6 | 8957523  | 8957920  | 398  | -1.13 | 0.000619 | 0.00489  | ENSMUSG0000004617  | Nxph1      | protein_codi | 8948431  | 9249032  | inside       | 9291    | 9092   | shortestDistance |
| chr6 | 8958626  | 8958876  | 251  | -1.81 | 7.59E-07 | 1.86E-05 | ENSMUSG0000004617  | Nxph1      | protein_codi | 8948431  | 9249032  | inside       | 10320   | 10195  | shortestDistance |
| chr6 | 9335602  | 9336437  | 836  | -2.18 | 1.73E-08 | 7.49E-07 | ENSMUSG0000004617  | Nxph1      | protein_codi | 8948431  | 9249032  | downstream   | 387589  | 86570  | shortestDistance |
| chr6 | 10943469 | 10943892 | 424  | -1.49 | 0.000321 | 0.0029   | ENSMUSG00000010784 | Gm35822    | lincRNA      | 10895490 | 10970126 | inside       | 48130   | 26324  | shortestDistance |
| chr6 | 11135654 | 11136003 | 350  | -3.1  | 9.50E-11 | 8.86E-09 | ENSMUSG00000010794 | AA545190   | lincRNA      | 10971560 | 10979638 | upstream     | -156610 | 156016 | shortestDistance |
| chr6 | 11284094 | 11284382 | 289  | -1.01 | 0.00891  | 0.0389   | ENSMUSG00000010794 | AA545190   | lincRNA      | 10971560 | 10979638 | upstream     | -304064 | 304456 | shortestDistance |
| chr6 | 11329956 |          |      |       |          |          |                    |            |              |          |          |              |         |        |                  |

|      |          |          |      |       |          |          |                                    |              |          |            |              |        |                  |                  |
|------|----------|----------|------|-------|----------|----------|------------------------------------|--------------|----------|------------|--------------|--------|------------------|------------------|
| chr6 | 13583781 | 13584373 | 593  | -1.57 | 0.000252 | 0.00238  | ENSMUSG0000002956Tmem168           | protein_codi | 13580687 | 13608100   | inside       | 24023  | 3094             | shortestDistance |
| chr6 | 13601488 | 13602063 | 576  | -0.9  | 0.00492  | 0.0246   | ENSMUSG0000002956Tmem168           | protein_codi | 13580687 | 13608100   | inside       | 6324   | 6037             | shortestDistance |
| chr6 | 13683913 | 13684486 | 574  | 2.03  | 1.92E-06 | 4.06E-05 | ENSMUSG0000004274Bmt2              | protein_codi | 13625673 | 13677966   | upstream     | -6234  | 5947             | shortestDistance |
| chr6 | 13758999 | 13759346 | 348  | -1.14 | 0.00133  | 0.00895  | ENSMUSG0000004821Gpr85             | protein_codi | 13834458 | 13839942   | downstream   | 80770  | 75112            | shortestDistance |
| chr6 | 13853286 | 13853616 | 331  | 1.77  | 0.000189 | 0.00189  | ENSMUSG0000004821Gpr85             | protein_codi | 13834458 | 13839942   | upstream     | -13509 | 13344            | shortestDistance |
| chr6 | 13870414 | 13870674 | 261  | -0.97 | 0.00471  | 0.0238   | ENSMUSG00000052412610001105F       | protein_codi | 13867735 | 13871518   | inside       | 974    | 844              | shortestDistance |
| chr6 | 13874035 | 13874291 | 257  | 1.3   | 0.000264 | 0.00247  | ENSMUSG00000097611110019D14lincRNA | 13871526     | 14044385 | inside     | 2637         | 2509   | shortestDistance |                  |
| chr6 | 14025923 | 14026671 | 749  | -1.33 | 0.000884 | 0.00646  | ENSMUSG00000097611110019D14lincRNA | 13871526     | 14044385 | inside     | 154771       | 17714  | shortestDistance |                  |
| chr6 | 14046558 | 14046946 | 389  | -0.89 | 0.00713  | 0.0327   | ENSMUSG00000097611110019D14lincRNA | 13871526     | 14044385 | downstream | 175226       | 2173   | shortestDistance |                  |
| chr6 | 14147270 | 14147975 | 706  | -1.4  | 0.00025  | 0.00236  | ENSMUSG0000008897Gm23760           | snoRNA       | 14113316 | 14113431   | downstream   | 34306  | 33839            | shortestDistance |
| chr6 | 14207403 | 14208042 | 640  | -0.94 | 0.00363  | 0.0194   | ENSMUSG0000008897Gm23760           | snoRNA       | 14113316 | 14113431   | downstream   | 94406  | 99972            | shortestDistance |
| chr6 | 14504067 | 14504584 | 518  | -1.24 | 0.000408 | 0.00351  | ENSMUSG00000007733Gm23013          | snRNA        | 14457045 | 14457150   | upstream     | -47176 | 46917            | shortestDistance |
| chr6 | 14522765 | 14523103 | 339  | -1.63 | 9.63E-06 | 0.00016  | ENSMUSG00000010765Gm44446          | processed_p  | 14570771 | 14571025   | downstream   | 48091  | 47668            | shortestDistance |
| chr6 | 14585870 | 14586169 | 300  | -1.15 | 0.001    | 0.00717  | ENSMUSG00000010765Gm44446          | processed_p  | 14570771 | 14571025   | upstream     | -14995 | 14845            | shortestDistance |
| chr6 | 14900470 | 14900957 | 488  | -1.23 | 0.00046  | 0.00387  | ENSMUSG0000002956Foxp2             | protein_codi | 14901349 | 15441977   | upstream     | -635   | 392              | shortestDistance |
| chr6 | 14901167 | 14902007 | 841  | -1.28 | 9.15E-05 | 0.00103  | ENSMUSG0000002956Foxp2             | protein_codi | 14901349 | 15441977   | overlapStart | 238    | 182              | shortestDistance |
| chr6 | 14902212 | 14902514 | 303  | -1.46 | 1.04E-05 | 0.00017  | ENSMUSG0000002956Foxp2             | protein_codi | 14901349 | 15441977   | inside       | 1014   | 863              | shortestDistance |
| chr6 | 15163706 | 15164026 | 321  | -1.16 | 0.00156  | 0.0101   | ENSMUSG0000002956Foxp2             | protein_codi | 14901349 | 15441977   | inside       | 262517 | 262357           | shortestDistance |
| chr6 | 15176854 | 15177103 | 250  | -1.08 | 0.00687  | 0.0319   | ENSMUSG0000002956Foxp2             | protein_codi | 14901349 | 15441977   | inside       | 275629 | 264874           | shortestDistance |
| chr6 | 15185060 | 15185332 | 273  | -1.69 | 5.22E-05 | 0.000654 | ENSMUSG0000002956Foxp2             | protein_codi | 14901349 | 15441977   | inside       | 283847 | 256645           | shortestDistance |
| chr6 | 15185372 | 15185762 | 391  | -1.4  | 0.00124  | 0.00845  | ENSMUSG0000002956Foxp2             | protein_codi | 14901349 | 15441977   | inside       | 284218 | 256215           | shortestDistance |
| chr6 | 15185968 | 15186385 | 418  | -1.64 | 2.15E-05 | 0.000314 | ENSMUSG0000002956Foxp2             | protein_codi | 14901349 | 15441977   | inside       | 284827 | 255592           | shortestDistance |
| chr6 | 15407507 | 15408461 | 955  | -0.98 | 0.00378  | 0.0201   | ENSMUSG0000002956Foxp2             | protein_codi | 14901349 | 15441977   | inside       | 506635 | 33516            | shortestDistance |
| chr6 | 15463195 | 15463856 | 662  | -1.19 | 0.000197 | 0.00195  | ENSMUSG0000002956Foxp2             | protein_codi | 14901349 | 15441977   | downstream   | 562177 | 21218            | shortestDistance |
| chr6 | 15505488 | 15505763 | 276  | -1.41 | 0.00348  | 0.0188   | ENSMUSG0000002956Foxp2             | protein_codi | 14901349 | 15441977   | downstream   | 604277 | 63511            | shortestDistance |
| chr6 | 15625632 | 15626555 | 924  | -1.74 | 1.27E-06 | 2.85E-05 | ENSMUSG00000010770Gm44039          | TEC          | 15636124 | 15638369   | upstream     | -10030 | 9569             | shortestDistance |
| chr6 | 15714998 | 15715522 | 525  | -1.53 | 3.28E-05 | 0.000446 | ENSMUSG00000004139Mdfic            | protein_codi | 15720661 | 15802169   | upstream     | -5401  | 5139             | shortestDistance |
| chr6 | 15720375 | 15721771 | 1397 | -0.98 | 0.00161  | 0.0104   | ENSMUSG00000004139Mdfic            | protein_codi | 15720661 | 15802169   | overlapStart | 412    | 286              | shortestDistance |
| chr6 | 15739118 | 15739643 | 526  | -1.07 | 0.00099  | 0.00707  | ENSMUSG00000004139Mdfic            | protein_codi | 15720661 | 15802169   | inside       | 18719  | 18457            | shortestDistance |
| chr6 | 15779712 | 15779963 | 252  | -1.7  | 0.000193 | 0.00191  | ENSMUSG00000004139Mdfic            | protein_codi | 15720661 | 15802169   | inside       | 59177  | 22206            | shortestDistance |
| chr6 | 15792755 | 15794241 | 1487 | -1.19 | 0.000134 | 0.00142  | ENSMUSG00000004139Mdfic            | protein_codi | 15720661 | 15802169   | inside       | 72837  | 7928             | shortestDistance |
| chr6 | 15900319 | 15900884 | 566  | -1.49 | 9.57E-06 | 0.000159 | ENSMUSG00000010804Gm43990          | TEC          | 15836089 | 15837779   | downstream   | 64513  | 62540            | shortestDistance |
| chr6 | 16221022 | 16221764 | 743  | -1.39 | 1.73E-05 | 0.000262 | ENSMUSG00000010782Gm43993          | processed_p  | 16233244 | 16233490   | downstream   | 12097  | 11480            | shortestDistance |
| chr6 | 16797676 | 16798192 | 517  | -1.14 | 0.00156  | 0.0101   | ENSMUSG00000010702Gm36669          | lincRNA      | 16777524 | 16788820   | downstream   | 20410  | 8856             | shortestDistance |
| chr6 | 16821670 | 16822457 | 788  | -1.07 | 0.000851 | 0.00628  | ENSMUSG0000002955Tfec              | protein_codi | 16833373 | 16898441   | downstream   | 76377  | 10916            | shortestDistance |
| chr6 | 16846540 | 16846841 | 302  | -1.6  | 0.000271 | 0.00253  | ENSMUSG0000002955Tfec              | protein_codi | 16833373 | 16898441   | inside       | 51751  | 13167            | shortestDistance |
| chr6 | 16849060 | 16849424 | 365  | -1.22 | 0.00778  | 0.035    | ENSMUSG0000002955Tfec              | protein_codi | 16833373 | 16898441   | inside       | 49199  | 15687            | shortestDistance |
| chr6 | 16891875 | 16892286 | 412  | -1.06 | 0.00594  | 0.0284   | ENSMUSG0000002955Tfec              | protein_codi | 16833373 | 16898441   | inside       | 6361   | 6155             | shortestDistance |
| chr6 | 16896491 | 16896911 | 421  | -1.09 | 0.00108  | 0.00756  | ENSMUSG0000002955Tfec              | protein_codi | 16833373 | 16898441   | inside       | 1740   | 1530             | shortestDistance |
| chr6 | 16896997 | 16897448 | 452  | -1.06 | 0.00307  | 0.0171   | ENSMUSG0000002955Tfec              | protein_codi | 16833373 | 16898441   | inside       | 1219   | 993              | shortestDistance |
| chr6 | 16994737 | 16995040 | 304  | -1.01 | 0.00501  | 0.0249   | ENSMUSG0000000847Gm15473           | lincRNA      | 17058806 | 17064996   | downstream   | 70108  | 63766            | shortestDistance |
| chr6 | 17012923 | 17013156 | 234  | -2.15 | 3.78E-06 | 7.24E-05 | ENSMUSG0000000847Gm15473           | lincRNA      | 17058806 | 17064996   | downstream   | 51956  | 46560            | shortestDistance |
| chr6 | 17110637 | 17110928 | 292  | -1.58 | 0.000517 | 0.00424  | ENSMUSG00000005455Gm4876           | antisense_RI | 17065010 | 17171833   | inside       | 61051  | 45627            | shortestDistance |
| chr6 | 17170451 | 17171809 | 1359 | -1.62 | 0.00238  | 0.0141   | ENSMUSG00000005455Gm4876           | antisense_RI | 17065010 | 17171833   | inside       | 703    | 24               | shortestDistance |
| chr6 | 17224906 | 17225209 | 304  | -2.3  | 3.82E-07 | 1.04E-05 | ENSMUSG00000008526Gm15581          | antisense_RI | 17206823 | 17385604   | inside       | 160546 | 18083            | shortestDistance |
| chr6 | 17280789 | 17282166 | 1378 | -0.84 | 0.00933  | 0.0403   | ENSMUSG00000000005Cav2             | protein_codi | 17281185 | 17289115   | overlapStart | 293    | 396              | shortestDistance |
| chr6 | 17282203 | 17282498 | 296  | -1.22 | 0.000903 | 0.00657  | ENSMUSG00000000005Cav2             | protein_codi | 17281185 | 17289115   | inside       | 1165   | 1018             | shortestDistance |
| chr6 | 17286401 | 17286709 | 309  | -1.01 | 0.00271  | 0.0155   | ENSMUSG00000000005Cav2             | protein_codi | 17281185 | 17289115   | inside       | 5370   | 2406             | shortestDistance |
| chr6 | 17305874 | 17306628 | 755  | -1.01 | 0.00108  | 0.00758  | ENSMUSG00000000765Cav1             | protein_codi | 17306335 | 17341452   | overlapStart | -84    | 293              | shortestDistance |
| chr6 | 17306661 | 17307368 | 708  | -1.58 | 7.42E-06 | 0.000128 | ENSMUSG00000000765Cav1             | protein_codi | 17306335 | 17341452   | inside       | 679    | 326              | shortestDistance |
| chr6 | 17307445 | 17307906 | 462  | -0.95 | 0.00596  | 0.0285   | ENSMUSG00000000765Cav1             | protein_codi | 17306335 | 17341452   | inside       | 1341   | 1110             | shortestDistance |
| chr6 | 17329885 | 17330155 | 271  | -1.13 | 0.00569  | 0.0275   | ENSMUSG00000000765Cav1             | protein_codi | 17306335 | 17341452   | inside       | 23685  | 11297            | shortestDistance |
| chr6 | 17340309 | 17340547 | 339  | -1.94 | 1.49E-06 | 3.27E-05 | ENSMUSG00000000765Cav1             | protein_codi | 17306335 | 17341452   | inside       | 34143  | 805              | shortestDistance |
| chr6 | 17385276 | 17386178 | 903  | 1.4   | 1.39E-05 | 0.000218 | ENSMUSG00000008526Gm15581          | antisense_RI | 17206823 | 17385604   | overlapStart | -123   | 328              | shortestDistance |
| chr6 | 17652129 | 17652548 | 420  | 2.31  | 3.78E-09 | 2.00E-07 | ENSMUSG00000001573Capza2           | protein_codi | 17636234 | 17666972   | inside       | 16104  | 14424            | shortestDistance |
| chr6 | 17743268 | 17743724 | 457  | -1.07 | 0.00264  | 0.0152   | ENSMUSG0000002953S17               | protein_codi | 17692933 | 17943025   | inside       | 50563  | 50335            | shortestDistance |
| chr6 | 17747728 | 17748118 | 391  | 2.45  | 1.75E-10 | 1.48E-08 | ENSMUSG00000010680Gm42852          | TEC          | 17747522 | 17748900   | inside       | 977    | 206              | shortestDistance |
| chr6 | 17828287 | 17828747 | 461  | -1.73 | 0.000946 | 0.00683  | ENSMUSG0000002953S17               | protein_codi | 17692933 | 17943025   | inside       | 135584 | 114278           | shortestDistance |
| chr6 | 17922482 | 17923514 | 1033 | -1.21 | 0.000628 | 0.00494  | ENSMUSG0000002953S17               | protein_codi | 17692933 | 17943025   | inside       | 230065 | 19511            | shortestDistance |
| chr6 | 18030229 | 18030834 | 606  | -0.88 | 0.0104   | 0.0436   | ENSMUSG00000001079Wnt2             | protein_codi | 17988940 | 18030585   | overlapStart | 53     | 249              | shortestDistance |
| chr6 | 18031543 | 18032270 | 728  | -1.07 | 0.00467  | 0.0236   | ENSMUSG00000001079Wnt2             | protein_codi | 17988940 | 18030585   | upstream     | -1321  | 958              | shortestDistance |
| chr6 | 18087213 | 18087537 | 325  | -1.57 | 0.000109 | 0.0012   | ENSMUSG00000001079Asz1             | protein_codi | 18050964 | 18109061   | inside       | 21686  | 21524            | shortestDistance |
| chr6 | 18153083 | 18153396 | 314  | -1.38 | 0.000729 | 0.00556  | ENSMUSG00000008228Gm15596          | processed_p  | 18156337 | 18157120   | downstream   | 3880   | 2941             | shortestDistance |
| chr6 | 18170327 | 18170911 | 585  | -1.49 | 8.57E-05 | 0.000977 | ENSMUSG00000004130Cfr              | protein_codi | 18170687 | 18322768   | overlapStart | -68    | 224              | shortestDistance |
| chr6 | 18171546 | 18172017 | 472  | -1.39 | 0.00133  | 0.00895  | ENSMUSG00000004130Cfr              | protein_codi | 18170687 | 18322768   | inside       | 1095   | 859              | shortestDistance |
| chr6 | 18372779 | 18373299 | 521  | -1.02 | 0.0026   | 0.0151   | ENSMUSG00000000041Ctnnb2           | protein_codi | 18366478 | 18514843   | inside       | 141804 | 6301             | shortestDistance |
| chr6 | 18499829 | 18500199 | 371  | -1.33 | 0.000629 | 0.00495  | ENSMUSG00000000041Ctnnb2           | protein_codi | 18366478 | 18514843   | inside       | 14829  | 14644            | shortestDistance |
| chr6 | 18513976 | 18515155 | 1180 | -0.99 | 0.0028   | 0.0159   | ENSMUSG00000000041Ctnnb2           | protein_codi | 18366478 | 18514843   | overlapStart | 277    | 312              | shortestDistance |
| chr6 | 18681929 | 18682527 | 599  | -1.7  | 1.29E-05 | 0.000205 | ENSMUSG00000009572Gm23648          | sRNA         | 18727292 | 18727398   | upstream     | -45064 | 44765            | shortestDistance |
| chr6 | 18800841 | 18801477 | 637  | -1.91 | 8.02E-09 | 3.84E-07 | ENSMUSG00000010729Gm43228          | processed_p  | 18792851 | 18793114   | downstream   | 8308   | 7727             | shortestDistance |
| chr6 | 18812472 | 18813196 | 725  | -1.33 | 0.000457 | 0.00384  | ENSMUSG00000001067Gm5874           | processed_p  | 18824552 | 18825059   | upstream     | -11718 | 11356            | shortestDistance |
| chr6 | 20726009 | 20726330 | 322  | -1.94 | 2.40E-05 | 0.000344 | ENSMUSG00000010676Gm19102          | processed_p  | 20970438 | 20970900   | downstream   | 244820 | 244108           | shortestDistance |
| chr6 | 20761261 | 20761740 | 480  | -1.05 | 0.00303  | 0.0169   | ENSMUSG00                          |              |          |            |              |        |                  |                  |

|      |           |          |      |       |          |          |                     |             |              |          |          |              |         |        |                  |
|------|-----------|----------|------|-------|----------|----------|---------------------|-------------|--------------|----------|----------|--------------|---------|--------|------------------|
| chr6 | 23457616  | 23458142 | 527  | -0.88 | 0.0118   | 0.048    | ENSMUSG0000001797   | Cadps2      | protein_codi | 23262773 | 23839421 | inside       | 381542  | 194843 | shortestDistance |
| chr6 | 23462695  | 23463304 | 610  | -1.14 | 0.00506  | 0.0251   | ENSMUSG0000001797   | Cadps2      | protein_codi | 23262773 | 23839421 | inside       | 376421  | 199922 | shortestDistance |
| chr6 | 23472742  | 23473056 | 315  | -1    | 0.00917  | 0.0397   | ENSMUSG0000001797   | Cadps2      | protein_codi | 23262773 | 23839421 | inside       | 366522  | 209969 | shortestDistance |
| chr6 | 23491850  | 23492241 | 392  | -1.62 | 1.93E-05 | 0.000286 | ENSMUSG0000001797   | Cadps2      | protein_codi | 23262773 | 23839421 | inside       | 347375  | 229077 | shortestDistance |
| chr6 | 23644219  | 23644626 | 408  | -1.98 | 3.92E-07 | 1.07E-05 | ENSMUSG0000001797   | Cadps2      | protein_codi | 23262773 | 23839421 | inside       | 194999  | 194795 | shortestDistance |
| chr6 | 23648621  | 23649165 | 545  | -2.17 | 1.17E-10 | 1.05E-08 | ENSMUSG0000001595   | Rnf133      | protein_codi | 23648869 | 23650305 | overlapEnd   | 1412    | 248    | shortestDistance |
| chr6 | 23838372  | 23839823 | 1452 | -1.05 | 0.00109  | 0.00765  | ENSMUSG0000001797   | Cadps2      | protein_codi | 23262773 | 23839421 | overlapStart | 323     | 402    | shortestDistance |
| chr6 | 23840085  | 23840404 | 320  | -1.47 | 1.10E-05 | 0.000179 | ENSMUSG0000001797   | Cadps2      | protein_codi | 23262773 | 23839421 | upstream     | -823    | 664    | shortestDistance |
| chr6 | 23886313  | 23886800 | 488  | -1.81 | 4.17E-06 | 7.86E-05 | ENSMUSG0000001797   | Cadps2      | protein_codi | 23262773 | 23839421 | upstream     | -47135  | 46892  | shortestDistance |
| chr6 | 24298657  | 24299223 | 567  | -1.45 | 0.00011  | 0.00121  | ENSMUSG0000001719   | Gm5302      | protein_codi | 24088283 | 24168092 | upstream     | -130848 | 130565 | shortestDistance |
| chr6 | 24309872  | 24310214 | 343  | -1.42 | 0.00126  | 0.00855  | ENSMUSG00000004619  | Iqub        | protein_codi | 24444865 | 24515067 | downstream   | 205024  | 134651 | shortestDistance |
| chr6 | 24350910  | 24351252 | 343  | -0.82 | 0.00881  | 0.0386   | ENSMUSG00000004619  | Iqub        | protein_codi | 24444865 | 24515067 | downstream   | 163986  | 93613  | shortestDistance |
| chr6 | 24450894  | 24451736 | 843  | -1.11 | 0.00375  | 0.0199   | ENSMUSG00000004619  | Iqub        | protein_codi | 24444865 | 24515067 | inside       | 63752   | 6029   | shortestDistance |
| chr6 | 24456163  | 24456491 | 329  | -1.13 | 0.000808 | 0.00603  | ENSMUSG00000004619  | Iqub        | protein_codi | 24444865 | 24515067 | inside       | 58740   | 11298  | shortestDistance |
| chr6 | 24514896  | 24515297 | 402  | -1.41 | 1.31E-05 | 0.000208 | ENSMUSG00000004619  | Iqub        | protein_codi | 24444865 | 24515067 | overlapStart | -29     | 171    | shortestDistance |
| chr6 | 24655826  | 24656415 | 590  | -1.91 | 8.99E-07 | 2.15E-05 | ENSMUSG0000002968   | Wasl        | protein_codi | 24613805 | 24665009 | inside       | 8889    | 8594   | shortestDistance |
| chr6 | 24684575  | 24684782 | 208  | -1.09 | 0.006    | 0.0287   | ENSMUSG0000002968   | Wasl        | protein_codi | 24613805 | 24665009 | upstream     | -19669  | 19566  | shortestDistance |
| chr6 | 24728141  | 24728526 | 386  | -2.38 | 6.65E-06 | 0.000117 | ENSMUSG00000002967  | Hyal6       | protein_codi | 24733245 | 24745452 | upstream     | -4911   | 4719   | shortestDistance |
| chr6 | 24756374  | 24756781 | 408  | -1.15 | 0.00835  | 0.037    | ENSMUSG0000002968   | Hyal4       | protein_codi | 24748329 | 24767662 | inside       | 8249    | 8045   | shortestDistance |
| chr6 | 24894292  | 24895184 | 893  | -1.37 | 7.74E-06 | 0.000133 | ENSMUSG0000000719   | Gm22267     | snoRNA       | 24894670 | 24894800 | includeFeatu | 62      | 378    | shortestDistance |
| chr6 | 24954829  | 24956569 | 1741 | -1.01 | 0.00196  | 0.0121   | ENSMUSG00000004802  | Tmem229a    | protein_codi | 24951141 | 24956297 | overlapStart | 598     | 272    | shortestDistance |
| chr6 | 25020049  | 25020360 | 312  | -0.9  | 0.012    | 0.0486   | ENSMUSG0000010721   | Gm5302      | processed_p  | 25046503 | 25047298 | downstream   | 27094   | 26143  | shortestDistance |
| chr6 | 25027025  | 25027337 | 313  | -1.38 | 0.00068  | 0.00527  | ENSMUSG0000010721   | Gm5302      | processed_p  | 25046503 | 25047298 | downstream   | 20117   | 19166  | shortestDistance |
| chr6 | 25688991  | 25689213 | 223  | -1.52 | 0.000257 | 0.00242  | ENSMUSG0000000399C  | Gpr37       | protein_codi | 25665878 | 25690729 | inside       | 1627    | 1516   | shortestDistance |
| chr6 | 25689335  | 25690544 | 1210 | -1.61 | 3.08E-06 | 6.10E-05 | ENSMUSG0000000399C  | Gpr37       | protein_codi | 25665878 | 25690729 | inside       | 789     | 185    | shortestDistance |
| chr6 | 25808700  | 25809643 | 944  | -0.88 | 0.00264  | 0.0152   | ENSMUSG000000297    | Pot1a       | protein_codi | 25743737 | 25809246 | overlapStart | 74      | 397    | shortestDistance |
| chr6 | 25898754  | 25899028 | 275  | -1.5  | 0.00304  | 0.017    | ENSMUSG0000010679   | Gm20756     | lincRNA      | 25931426 | 25977227 | upstream     | -32535  | 32398  | shortestDistance |
| chr6 | 25931729  | 25931976 | 248  | -1.57 | 0.000166 | 0.0017   | ENSMUSG0000010679   | Gm20756     | lincRNA      | 25931426 | 25977227 | inside       | 426     | 303    | shortestDistance |
| chr6 | 25978175  | 25978780 | 606  | -1.81 | 2.00E-04 | 0.00197  | ENSMUSG0000010679   | Gm20756     | lincRNA      | 25931426 | 25977227 | downstream   | 47052   | 948    | shortestDistance |
| chr6 | 26301527  | 26301856 | 330  | -2.45 | 2.62E-07 | 7.57E-06 | ENSMUSG0000008838   | Gm24691     | snoRNA       | 26460291 | 26460430 | downstream   | 158738  | 158435 | shortestDistance |
| chr6 | 26304197  | 26304572 | 376  | 2.17  | 3.98E-05 | 0.000523 | ENSMUSG0000008838   | Gm24691     | snoRNA       | 26460291 | 26460430 | downstream   | 156046  | 155719 | shortestDistance |
| chr6 | 26709255  | 26709953 | 699  | -1.32 | 0.000109 | 0.0012   | ENSMUSG0000010674   | Gm24274     | processed_p  | 26830417 | 26831158 | upstream     | -120813 | 120464 | shortestDistance |
| chr6 | 26766126  | 26767560 | 1435 | -1.3  | 2.68E-05 | 0.000377 | ENSMUSG0000010674   | Gm24274     | processed_p  | 26830417 | 26831158 | upstream     | -63574  | 62857  | shortestDistance |
| chr6 | 26895870  | 26896122 | 253  | -1.76 | 0.000837 | 0.00621  | ENSMUSG0000010674   | Gm24274     | processed_p  | 26830417 | 26831158 | downstream   | 65579   | 64712  | shortestDistance |
| chr6 | 27360367  | 27360800 | 434  | -1.38 | 0.000197 | 0.00195  | ENSMUSG0000000421   | Grm8        | protein_codi | 27275119 | 28135178 | inside       | 774594  | 85248  | shortestDistance |
| chr6 | 28100053  | 28100329 | 277  | -2.1  | 4.60E-06 | 8.55E-05 | ENSMUSG0000000421   | Grm8        | protein_codi | 27275119 | 28135178 | inside       | 34987   | 34849  | shortestDistance |
| chr6 | 28134920  | 28136250 | 1331 | -0.88 | 0.00478  | 0.024    | ENSMUSG0000000421   | Grm8        | protein_codi | 27275119 | 28135178 | overlapStart | -407    | 258    | shortestDistance |
| chr6 | 28160418  | 28160736 | 319  | -1.36 | 0.00237  | 0.0141   | ENSMUSG0000000421   | Grm8        | protein_codi | 27275119 | 28135178 | upstream     | -25399  | 25240  | shortestDistance |
| chr6 | 28232651  | 28232992 | 342  | -2.71 | 7.71E-05 | 0.000899 | ENSMUSG0000000434   | Gm350409C15 | antisense_RI | 28215555 | 28260862 | inside       | 17267   | 17096  | shortestDistance |
| chr6 | 28292672  | 28293116 | 445  | -1.2  | 0.00411  | 0.0214   | ENSMUSG00000003984  | Zfp800      | protein_codi | 28239927 | 28398005 | inside       | 105111  | 52745  | shortestDistance |
| chr6 | 28323299  | 28322792 | 394  | -1.18 | 0.00105  | 0.00741  | ENSMUSG00000003984  | Zfp800      | protein_codi | 28239927 | 28398005 | inside       | 75409   | 75213  | shortestDistance |
| chr6 | 28411177  | 28411573 | 457  | 1.33  | 0.000518 | 0.00424  | ENSMUSG0000000297C  | Gcc1        | protein_codi | 28416091 | 28428390 | downstream   | 17045   | 4518   | shortestDistance |
| chr6 | 28497778  | 28498653 | 876  | -0.75 | 0.0117   | 0.0479   | ENSMUSG00000000442  | Snd1        | protein_codi | 28475139 | 28935162 | inside       | 23077   | 22639  | shortestDistance |
| chr6 | 28867534  | 28868028 | 495  | -1.06 | 0.0104   | 0.0438   | ENSMUSG00000000442  | Snd1        | protein_codi | 28475139 | 28935162 | inside       | 392642  | 67134  | shortestDistance |
| chr6 | 28929176  | 28929701 | 526  | -2.09 | 0.00263  | 0.0152   | ENSMUSG00000000442  | Snd1        | protein_codi | 28475139 | 28935162 | inside       | 454299  | 5461   | shortestDistance |
| chr6 | 28931602  | 28932268 | 467  | -1.48 | 0.00027  | 0.00251  | ENSMUSG00000000442  | Snd1        | protein_codi | 28475139 | 28935162 | inside       | 456896  | 2894   | shortestDistance |
| chr6 | 29244804  | 29247027 | 424  | -0.96 | 0.00621  | 0.0294   | ENSMUSG00000008928  | Gm26021     | snoRNA       | 29234434 | 29234564 | downstream   | 12382   | 12040  | shortestDistance |
| chr6 | 29524016  | 29524641 | 626  | 1.2   | 0.00397  | 0.0208   | ENSMUSG00000002977  | Irf5        | protein_codi | 29526625 | 29541871 | upstream     | -2297   | 1984   | shortestDistance |
| chr6 | 29762250  | 29762837 | 248  | 1.85  | 0.00024  | 0.00229  | ENSMUSG000000000176 | Smo         | protein_codi | 29735503 | 29761365 | downstream   | 27211   | 1225   | shortestDistance |
| chr6 | 302277037 | 30227350 | 314  | -1.24 | 0.00201  | 0.0123   | ENSMUSG000000003915 | Ube2h       | protein_codi | 30211289 | 30304539 | inside       | 77345   | 15748  | shortestDistance |
| chr6 | 30616508  | 30617025 | 518  | 1.16  | 0.00347  | 0.0188   | ENSMUSG000000000879 | Cpa5        | protein_codi | 30611010 | 30631745 | inside       | 5756    | 5498   | shortestDistance |
| chr6 | 31065411  | 31065894 | 484  | 2.87  | 9.27E-09 | 4.39E-07 | ENSMUSG000000009799 | Gm27019     | lincRNA      | 31063092 | 31063495 | upstream     | -2157   | 1916   | shortestDistance |
| chr6 | 31088041  | 31088945 | 905  | 1.41  | 0.00161  | 0.0104   | ENSMUSG000000008485 | Gm13834     | lincRNA      | 31087609 | 31087912 | upstream     | -581    | 129    | shortestDistance |
| chr6 | 31145737  | 31146030 | 294  | 3.12  | 3.84E-07 | 1.05E-05 | ENSMUSG0000010322   | Gm37728     | TEC          | 31145128 | 31147419 | inside       | 1535    | 609    | shortestDistance |
| chr6 | 31159343  | 31159806 | 464  | 1.46  | 0.000263 | 0.00246  | ENSMUSG000000004447 | Lncpint     | lincRNA      | 31093559 | 31218474 | inside       | 58900   | 58668  | shortestDistance |
| chr6 | 31209292  | 31210270 | 979  | 0.9   | 0.00855  | 0.0377   | ENSMUSG000000004447 | Lncpint     | lincRNA      | 31093559 | 31218474 | inside       | 8693    | 8204   | shortestDistance |
| chr6 | 31693045  | 31693409 | 365  | -1.39 | 0.00133  | 0.00895  | ENSMUSG000000008680 | Gm43154     | lincRNA      | 31605190 | 31798053 | inside       | 88037   | 87855  | shortestDistance |
| chr6 | 31809747  | 31810318 | 572  | 1.47  | 9.61E-05 | 0.00108  | ENSMUSG000000008761 | Gm13849     | lincRNA      | 31786675 | 31922270 | inside       | 23357   | 23072  | shortestDistance |
| chr6 | 321109238 | 32109952 | 715  | -0.87 | 0.00968  | 0.0414   | ENSMUSG000000000583 | Gm13850     | lincRNA      | 32112143 | 32113226 | upstream     | -2548   | 2191   | shortestDistance |
| chr6 | 32167704  | 32168034 | 331  | 3.28  | 1.51E-09 | 9.12E-08 | ENSMUSG000000002976 | Plxna4      | protein_codi | 32144268 | 32588192 | inside       | 420323  | 23436  | shortestDistance |
| chr6 | 32479370  | 32479982 | 613  | -1.32 | 0.000351 | 0.00312  | ENSMUSG000000002976 | Plxna4      | protein_codi | 32144268 | 32588192 | inside       | 108516  | 108210 | shortestDistance |
| chr6 | 32504865  | 32505320 | 456  | -2.07 | 1.52E-08 | 6.76E-07 | ENSMUSG000000002976 | Plxna4      | protein_codi | 32144268 | 32588192 | inside       | 83100   | 82872  | shortestDistance |
| chr6 | 32510804  | 32511439 | 636  | -1.13 | 0.00124  | 0.00848  | ENSMUSG000000008676 | Plxna4os1   | antisense_RI | 32511073 | 32515576 | overlapStart | 49      | 269    | shortestDistance |
| chr6 | 32591440  | 32591678 | 239  | -1.16 | 0.00343  | 0.0186   | ENSMUSG000000002976 | Plxna4      | protein_codi | 32144268 | 32588192 | inside       | -3367   | 3248   | shortestDistance |
| chr6 | 33866952  | 33867528 | 577  | 3.17  | 2.00E-11 | 2.39E-09 | ENSMUSG000000002976 | Exoc4       | protein_codi | 33249085 | 33973979 | inside       | 618155  | 106451 | shortestDistance |
| chr6 | 34000072  | 34001009 | 308  | -1.28 | 0.000967 | 0.00695  | ENSMUSG000000008744 | Gm13853     | lincRNA      | 33984989 | 33992411 | upstream     | -8445   | 8291   | shortestDistance |
| chr6 | 34216793  | 34217404 | 612  | -1.33 | 0.000634 | 0.00498  | ENSMUSG000000008761 | Gm13855     | lincRNA      | 34179232 | 34186392 | downstream   | 37866   | 30401  | shortestDistance |
| chr6 | 34242255  | 34242825 | 571  | -0.97 | 0.00808  | 0.0361   | ENSMUSG000000008676 | Gm14546     | antisense_RI | 34290265 | 34324249 | upstream     | -47725  | 47440  | shortestDistance |
| chr6 | 34494930  | 34495541 | 612  | -1.18 | 0.000959 | 0.0069   | ENSMUSG00000003887  | Bpgm        | protein_codi | 34476207 | 34505613 | inside       | 19029   | 10072  | shortestDistance |
| chr6 | 34511440  | 34511744 | 305  | -1.18 | 0.00309  | 0.0172   | ENSMUSG00000003887  | Bpgm        | protein_codi | 34476207 | 34505613 | downstream   | 35385   | 5827   | shortestDistance |
| chr6 | 34716529  | 34716860 | 332  | 1.36  | 0.00833  | 0.0369   | ENSMUSG000000002976 | Cald1       | protein_codi | 34598500 | 34775473 | inside       | 1181    |        |                  |

|      |          |          |      |       |          |          |                              |              |          |          |              |        |        |                  |
|------|----------|----------|------|-------|----------|----------|------------------------------|--------------|----------|----------|--------------|--------|--------|------------------|
| chr6 | 38320577 | 38321029 | 453  | 1.37  | 0.000702 | 0.0054   | ENSMUSG0000002982Zc3hav1     | protein_codi | 38305286 | 38354603 | inside       | 33800  | 15291  | shortestDistance |
| chr6 | 38345819 | 38346242 | 424  | 1.01  | 0.00316  | 0.0175   | ENSMUSG0000002982Zc3hav1     | protein_codi | 38305286 | 38354603 | inside       | 8573   | 8361   | shortestDistance |
| chr6 | 38360070 | 38360440 | 371  | 1.79  | 3.07E-05 | 0.000422 | ENSMUSG0000010683Gm43578     | processed_p  | 38365232 | 38365902 | downstream   | 5647   | 4792   | shortestDistance |
| chr6 | 38874056 | 38874289 | 234  | 1.09  | 0.00627  | 0.0296   | ENSMUSG0000006143Hlpk2       | protein_codi | 38694390 | 38876165 | inside       | 1993   | 1876   | shortestDistance |
| chr6 | 38949671 | 38950197 | 527  | 1.65  | 1.02E-05 | 0.000168 | ENSMUSG0000010673Gm42962     | antisense_RI | 38917098 | 38984325 | inside       | 34391  | 32573  | shortestDistance |
| chr6 | 38950316 | 38950711 | 396  | 3.66  | 6.17E-11 | 6.11E-09 | ENSMUSG0000010673Gm42962     | antisense_RI | 38917098 | 38984325 | inside       | 33811  | 33218  | shortestDistance |
| chr6 | 38974837 | 38975256 | 420  | 1.76  | 5.87E-05 | 0.000723 | ENSMUSG0000010673Gm42962     | antisense_RI | 38917098 | 38984325 | inside       | 9279   | 9069   | shortestDistance |
| chr6 | 38981400 | 38981732 | 333  | 1.87  | 5.48E-05 | 0.000682 | ENSMUSG0000010673Gm42962     | antisense_RI | 38917098 | 38984325 | inside       | 2759   | 2593   | shortestDistance |
| chr6 | 38982092 | 38982447 | 356  | 2.31  | 5.62E-07 | 1.44E-05 | ENSMUSG0000010673Gm42962     | antisense_RI | 38917098 | 38984325 | inside       | 2055   | 1878   | shortestDistance |
| chr6 | 38992005 | 38992547 | 543  | -1.03 | 0.00992  | 0.0422   | ENSMUSG0000002992Tbxas1      | protein_codi | 38875404 | 39084585 | inside       | 116872 | 92038  | shortestDistance |
| chr6 | 39278264 | 39278777 | 514  | 3.76  | 3.54E-14 | 1.17E-11 | ENSMUSG0000008942Gm26008     | snRNA        | 39265844 | 39265942 | upstream     | -12578 | 12322  | shortestDistance |
| chr6 | 39286030 | 39286435 | 406  | -1.63 | 0.000108 | 0.00119  | ENSMUSG0000008942Gm26008     | snRNA        | 39265844 | 39265942 | upstream     | -20290 | 20088  | shortestDistance |
| chr6 | 39782751 | 39783013 | 263  | 1.43  | 0.000405 | 0.0035   | ENSMUSG0000002991Mrps33      | protein_codi | 39801804 | 39810988 | downstream   | 28106  | 18791  | shortestDistance |
| chr6 | 40013256 | 40013867 | 612  | -1.97 | 1.32E-07 | 4.21E-06 | ENSMUSG0000005771Tmem178b    | protein_codi | 39873271 | 40255150 | inside       | 140291 | 139985 | shortestDistance |
| chr6 | 40115083 | 40115401 | 319  | -1.44 | 0.00089  | 0.00649  | ENSMUSG0000005771Tmem178b    | protein_codi | 39873271 | 40255150 | inside       | 241971 | 139749 | shortestDistance |
| chr6 | 40142531 | 40143223 | 693  | -1.87 | 3.33E-07 | 9.32E-06 | ENSMUSG0000005771Tmem178b    | protein_codi | 39873271 | 40255150 | inside       | 269606 | 111927 | shortestDistance |
| chr6 | 40161432 | 40161700 | 269  | -1.41 | 0.00626  | 0.0296   | ENSMUSG0000005771Tmem178b    | protein_codi | 39873271 | 40255150 | inside       | 288295 | 93450  | shortestDistance |
| chr6 | 40544732 | 40545082 | 351  | 2.2   | 5.08E-06 | 9.31E-05 | ENSMUSG0000006825Olfra460    | protein_codi | 40542171 | 40555050 | inside       | 10143  | 2561   | shortestDistance |
| chr6 | 40573617 | 40574089 | 473  | 1     | 0.00447  | 0.0229   | ENSMUSG0000004551Olfra460    | protein_codi | 40569487 | 40574343 | inside       | 4366   | 254    | shortestDistance |
| chr6 | 40588381 | 40588717 | 337  | 3.08  | 2.18E-10 | 1.77E-08 | ENSMUSG0000002991Clec5a      | protein_codi | 40574894 | 40585821 | upstream     | -2728  | 2560   | shortestDistance |
| chr6 | 40594811 | 40595555 | 745  | 1.28  | 0.000755 | 0.00571  | ENSMUSG0000002991Clec5a      | protein_codi | 40574894 | 40585821 | upstream     | -9362  | 8990   | shortestDistance |
| chr6 | 40641214 | 40641425 | 212  | 1.44  | 0.00504  | 0.025    | ENSMUSG0000006858Mgam        | protein_codi | 40628831 | 40769123 | inside       | 12489  | 12383  | shortestDistance |
| chr6 | 40891212 | 40892122 | 362  | -0.93 | 0.00512  | 0.0253   | ENSMUSG0000007646Trbv1       | TR_V_gene    | 40891229 | 40891885 | overlapEnd   | 713    | 124    | shortestDistance |
| chr6 | 41018598 | 41019021 | 424  | 2.04  | 1.21E-06 | 2.76E-05 | ENSMUSG0000010410Gm37878     | unprocessed  | 41021243 | 41021884 | downstream   | 3074   | 2222   | shortestDistance |
| chr6 | 41047896 | 41048325 | 430  | -0.93 | 0.00735  | 0.0335   | ENSMUSG0000007646Trbv3       | TR_V_gene    | 41048290 | 41048828 | overlapStart | -180   | 35     | shortestDistance |
| chr6 | 41059771 | 41060119 | 349  | -1.71 | 6.99E-05 | 0.000832 | ENSMUSG0000010748Trbv4       | TR_V_gene    | 41059394 | 41059886 | overlapEnd   | 551    | 115    | shortestDistance |
| chr6 | 41062562 | 41063118 | 557  | 1.3   | 0.00131  | 0.00886  | ENSMUSG0000007646Trbv5       | TR_V_gene    | 41062332 | 41062803 | overlapEnd   | 508    | 230    | shortestDistance |
| chr6 | 41108951 | 41109197 | 247  | -1.21 | 0.00325  | 0.0179   | ENSMUSG0000010290Trbv11      | TR_V_pseud   | 41107044 | 41107303 | downstream   | 2030   | 1648   | shortestDistance |
| chr6 | 41111910 | 41112369 | 460  | 1.12  | 0.00209  | 0.0127   | ENSMUSG0000009557Trbv12-1    | TR_V_gene    | 41113550 | 41114067 | upstream     | -1410  | 1181   | shortestDistance |
| chr6 | 41118220 | 41118983 | 764  | -0.9  | 0.00512  | 0.0254   | ENSMUSG0000009452Trbv12-2    | TR_V_gene    | 41118851 | 41119364 | overlapStart | -249   | 132    | shortestDistance |
| chr6 | 41188026 | 41188355 | 330  | -1.07 | 0.00447  | 0.0229   | ENSMUSG0000007647Trbv2       | TR_V_gene    | 41188273 | 41188977 | overlapStart | -83    | 82     | shortestDistance |
| chr6 | 41227871 | 41228234 | 364  | -1.24 | 0.00118  | 0.00812  | ENSMUSG0000007647Trbv26      | TR_V_gene    | 41227505 | 41227993 | overlapEnd   | 547    | 122    | shortestDistance |
| chr6 | 41527185 | 41527773 | 589  | -0.98 | 0.00657  | 0.0308   | ENSMUSG0000005716Prss2       | protein_codi | 41521787 | 41525079 | downstream   | 5692   | 2106   | shortestDistance |
| chr6 | 41534665 | 41535060 | 396  | -1.31 | 0.000728 | 0.00555  | ENSMUSG0000007648Trbj1-4     | TR_J_gene    | 41534811 | 41534861 | includeFeatu | 51     | 146    | shortestDistance |
| chr6 | 41621569 | 41621918 | 350  | -1.42 | 0.00258  | 0.015    | ENSMUSG0000002986Trpv6       | protein_codi | 41620624 | 41636405 | inside       | 14661  | 945    | shortestDistance |
| chr6 | 41628237 | 41628542 | 306  | -1.03 | 0.00663  | 0.031    | ENSMUSG0000002986Trpv6       | protein_codi | 41620624 | 41636405 | inside       | 8015   | 7613   | shortestDistance |
| chr6 | 41654486 | 41655148 | 663  | -1.24 | 8.18E-05 | 0.000943 | ENSMUSG0000004965Tasr2143    | protein_codi | 41652173 | 41680769 | inside       | 25952  | 2313   | shortestDistance |
| chr6 | 41702974 | 41703300 | 327  | -1.31 | 0.000494 | 0.00409  | ENSMUSG0000002986Kel         | protein_codi | 41686330 | 41704339 | inside       | 1202   | 1039   | shortestDistance |
| chr6 | 41728428 | 41728545 | 298  | -1.19 | 0.00608  | 0.029    | ENSMUSG0000002986Kel         | protein_codi | 41686330 | 41704339 | upstream     | -24057 | 23909  | shortestDistance |
| chr6 | 41769672 | 41770473 | 802  | -2.27 | 2.86E-05 | 0.000398 | ENSMUSG0000004547Olfra459    | protein_codi | 41768770 | 41775177 | inside       | 5105   | 902    | shortestDistance |
| chr6 | 42245661 | 42246268 | 608  | -0.88 | 0.00393  | 0.0207   | ENSMUSG0000002986Gstkl       | protein_codi | 42245935 | 42250447 | overlapStart | 29     | 274    | shortestDistance |
| chr6 | 42257289 | 42257702 | 414  | -1.15 | 0.000688 | 0.00531  | ENSMUSG0000007152Tmem139     | protein_codi | 42261970 | 42264555 | upstream     | -4474  | 4268   | shortestDistance |
| chr6 | 42343312 | 42344745 | 1434 | -0.89 | 0.00959  | 0.0411   | ENSMUSG0000010803Gm44284     | antisense_RI | 42328713 | 42350862 | inside       | 6834   | 6117   | shortestDistance |
| chr6 | 42381867 | 42382613 | 747  | -1.24 | 0.000226 | 0.00218  | ENSMUSG00000101262010310C071 | antisense_RI | 42370671 | 42381215 | downstream   | 11569  | 652    | shortestDistance |
| chr6 | 42396212 | 42396841 | 630  | 0.83  | 0.00683  | 0.0386   | ENSMUSG0000004665Tasr2143    | protein_codi | 42400238 | 42401119 | upstream     | -3712  | 3397   | shortestDistance |
| chr6 | 42419392 | 42419795 | 404  | 3.01  | 3.82E-11 | 4.10E-09 | ENSMUSG0000005620Tasr2135    | protein_codi | 42405434 | 42406526 | downstream   | 14160  | 12866  | shortestDistance |
| chr6 | 42432433 | 42433919 | 497  | -1.43 | 0.000279 | 0.00259  | ENSMUSG0000004828Tasr2126    | protein_codi | 42434535 | 42435464 | upstream     | -864   | 616    | shortestDistance |
| chr6 | 42612239 | 42612638 | 400  | -1.24 | 0.000459 | 0.00386  | ENSMUSG0000002985Tca12       | protein_codi | 42623016 | 42645254 | downstream   | 32816  | 10378  | shortestDistance |
| chr6 | 42692049 | 42693288 | 1240 | -1.2  | 0.000618 | 0.00489  | ENSMUSG0000003666Tca1        | protein_codi | 42680002 | 42710088 | inside       | 17420  | 16800  | shortestDistance |
| chr6 | 42709805 | 42710222 | 418  | -1.48 | 0.00038  | 0.00333  | ENSMUSG0000003666Tca1        | protein_codi | 42680002 | 42710088 | overlapStart | 74     | 134    | shortestDistance |
| chr6 | 42860222 | 42860734 | 513  | -1.3  | 0.000153 | 0.00159  | ENSMUSG0000004916Olfra449    | protein_codi | 42834384 | 42839516 | downstream   | 26094  | 20706  | shortestDistance |
| chr6 | 43021981 | 43022524 | 544  | -1.13 | 0.000801 | 0.00598  | ENSMUSG0000000910Gm17472     | IG_LV_gene   | 42980690 | 42981150 | downstream   | 41562  | 40831  | shortestDistance |
| chr6 | 43240012 | 43242413 | 312  | -1.01 | 0.00252  | 0.0147   | ENSMUSG0000006120Olfra47     | protein_codi | 43231529 | 43236959 | downstream   | 10729  | 5143   | shortestDistance |
| chr6 | 43254191 | 43254545 | 355  | -0.83 | 0.0123   | 0.0497   | ENSMUSG0000010819Gm44731     | antisense_RI | 43264542 | 43265855 | downstream   | 11487  | 9997   | shortestDistance |
| chr6 | 43260764 | 43261017 | 254  | -1.59 | 0.000203 | 0.002    | ENSMUSG0000010819Gm44731     | antisense_RI | 43264542 | 43265855 | downstream   | 4965   | 3525   | shortestDistance |
| chr6 | 43265362 | 43267245 | 1884 | -1.22 | 4.27E-05 | 0.000555 | ENSMUSG0000003354Arhgef5     | protein_codi | 43265582 | 43289320 | overlapStart | 722    | 220    | shortestDistance |
| chr6 | 43291398 | 43292760 | 823  | -2.39 | 3.75E-12 | 5.65E-10 | ENSMUSG0000003354Arhgef5     | protein_codi | 43265582 | 43289320 | downstream   | 26767  | 2618   | shortestDistance |
| chr6 | 43296935 | 43297672 | 738  | -0.97 | 0.0102   | 0.043    | ENSMUSG0000002973Nobox       | protein_codi | 43303674 | 43309554 | downstream   | 12250  | 6002   | shortestDistance |
| chr6 | 43303876 | 43304195 | 320  | -1.15 | 0.00401  | 0.021    | ENSMUSG0000002973Nobox       | protein_codi | 43303674 | 43309554 | inside       | 5518   | 202    | shortestDistance |
| chr6 | 43309215 | 43309568 | 354  | -1.38 | 0.000638 | 0.005    | ENSMUSG0000002973Nobox       | protein_codi | 43303674 | 43309554 | overlapStart | 162    | 14     | shortestDistance |
| chr6 | 43354475 | 43355212 | 738  | -1.34 | 0.00196  | 0.0121   | ENSMUSG0000002973Tpkl        | protein_codi | 43345001 | 43666278 | inside       | 311434 | 9474   | shortestDistance |
| chr6 | 43395638 | 43395875 | 238  | -1.11 | 0.00803  | 0.0359   | ENSMUSG0000002973Tpkl        | protein_codi | 43345001 | 43666278 | inside       | 270522 | 50637  | shortestDistance |
| chr6 | 43408697 | 43409404 | 708  | -1.18 | 0.0051   | 0.0253   | ENSMUSG0000002973Tpkl        | protein_codi | 43345001 | 43666278 | inside       | 257228 | 63696  | shortestDistance |
| chr6 | 43449368 | 43449898 | 531  | -1.19 | 0.000318 | 0.00287  | ENSMUSG0000002973Tpkl        | protein_codi | 43345001 | 43666278 | inside       | 216645 | 104367 | shortestDistance |
| chr6 | 43477779 | 43478045 | 267  | -1.68 | 0.000276 | 0.00256  | ENSMUSG0000002973Tpkl        | protein_codi | 43345001 | 43666278 | inside       | 188366 | 132778 | shortestDistance |
| chr6 | 43478483 | 43478803 | 321  | -2.08 | 2.12E-06 | 4.43E-05 | ENSMUSG0000002973Tpkl        | protein_codi | 43345001 | 43666278 | inside       | 187635 | 133482 | shortestDistance |
| chr6 | 43492430 | 43492695 | 266  | -2.15 | 8.59E-07 | 2.07E-05 | ENSMUSG0000002973Tpkl        | protein_codi | 43345001 | 43666278 | inside       | 173716 | 147429 | shortestDistance |
| chr6 | 43546514 | 43546910 | 397  | -0.92 | 0.0104   | 0.0437   | ENSMUSG0000002973Tpkl        | protein_codi | 43345001 | 43666278 | inside       | 119566 | 119368 | shortestDistance |
| chr6 | 43619220 | 43619640 | 421  | -1.03 | 0.000775 | 0.00583  | ENSMUSG0000002973Tpkl        | protein_codi | 43345001 | 43666278 | inside       | 46848  | 46638  | shortestDistance |
| chr6 | 43636989 | 43637619 | 631  | -1.2  | 0.000202 | 0.00199  | ENSMUSG0000002973Tpkl        | protein_codi | 43345001 | 43666278 | inside       | 28974  | 28659  | shortestDistance |
| chr6 | 43645660 | 43646096 | 437  | -0.92 | 0.00302  | 0.0169   | ENSMUSG0000002973Tpkl        | protein_codi | 43345001 | 43666278 | inside       | 20400  | 20182  | shortestDistance |
| chr6 | 43685584 | 43686308 | 455  | -1.16 | 0.0105   | 0.0442   | ENSMUSG0000002973Tpkl        | protein_codi | 43345001 | 43666278 | upstream     | -19803 | 19576  | shortestDistance |
| chr6 | 44545010 | 44545252 | 243  | -1.41 | 0.00278  | 0.0158   | ENSMUSG0000010795Gm44211     | processed_p  | 44667291 | 4        |              |        |        |                  |

|      |           |          |      |       |          |          |                   |             |              |          |          |              |        |        |                  |
|------|-----------|----------|------|-------|----------|----------|-------------------|-------------|--------------|----------|----------|--------------|--------|--------|------------------|
| chr6 | 49349884  | 49350381 | 498  | 2.9   | 1.86E-09 | 1.10E-07 | ENSMUSG0000005078 | Ccdc126     | protein_codi | 49319274 | 49341582 | downstream   | 30858  | 8302   | shortestDistance |
| chr6 | 50187942  | 50188356 | 415  | 1.26  | 0.00259  | 0.015    | ENSMUSG0000003838 | Mpp6        | protein_codi | 50110241 | 50198939 | inside       | 77908  | 10583  | shortestDistance |
| chr6 | 50545156  | 50545920 | 765  | 2.08  | 2.53E-08 | 1.04E-06 | ENSMUSG0000007735 | Gm26289     | snoRNA       | 50539904 | 50540034 | upstream     | -5504  | 5122   | shortestDistance |
| chr6 | 51170866  | 51171293 | 428  | 0.84  | 0.0103   | 0.0434   | ENSMUSG0000006550 | Mir148a     | miRNA        | 51269812 | 51269910 | downstream   | 98830  | 98519  | shortestDistance |
| chr6 | 51178150  | 51178903 | 754  | 1.1   | 0.000506 | 0.00417  | ENSMUSG0000006550 | Mir148a     | miRNA        | 51269812 | 51269910 | downstream   | 91384  | 90909  | shortestDistance |
| chr6 | 51270472  | 51271403 | 932  | 1     | 0.00436  | 0.0224   | ENSMUSG0000006550 | Mir148a     | miRNA        | 51269812 | 51269910 | upstream     | -1028  | 562    | shortestDistance |
| chr6 | 51469676  | 51470758 | 1083 | 0.97  | 0.00171  | 0.0109   | ENSMUSG0000002983 | Cbx3        | protein_codi | 51470360 | 51483704 | overlapStart | -143   | 398    | shortestDistance |
| chr6 | 51524986  | 51525490 | 505  | 1.02  | 0.00441  | 0.0226   | ENSMUSG0000003830 | Snx10       | protein_codi | 51523901 | 51590679 | inside       | 1337   | 1085   | shortestDistance |
| chr6 | 51533403  | 51533784 | 382  | 1.76  | 0.000384 | 0.00336  | ENSMUSG0000003830 | Snx10       | protein_codi | 51523901 | 51590679 | inside       | 9693   | 9502   | shortestDistance |
| chr6 | 51533890  | 51534126 | 237  | 1.81  | 0.000357 | 0.00316  | ENSMUSG0000003830 | Snx10       | protein_codi | 51523901 | 51590679 | inside       | 10107  | 9989   | shortestDistance |
| chr6 | 51606311  | 51606723 | 413  | 1.61  | 0.000651 | 0.00509  | ENSMUSG0000009452 | Gm22914     | miRNA        | 51621632 | 51621708 | upstream     | -15115 | 14909  | shortestDistance |
| chr6 | 51683134  | 51683830 | 697  | 1.43  | 0.0034   | 0.0185   | ENSMUSG0000010814 | Gm38811     | lincRNA      | 51694309 | 51711081 | downstream   | 27599  | 10479  | shortestDistance |
| chr6 | 524711260 | 52471984 | 725  | 1.21  | 0.00263  | 0.0152   | ENSMUSG0000010789 | 1700094M24  | lincRNA      | 52492451 | 52500086 | upstream     | -20829 | 20467  | shortestDistance |
| chr6 | 52622090  | 52622495 | 406  | 1.47  | 0.000386 | 0.00337  | ENSMUSG0000002977 | Hibadh      | protein_codi | 52546228 | 52640389 | inside       | 18097  | 17894  | shortestDistance |
| chr6 | 52672574  | 52673044 | 471  | 1.46  | 0.000776 | 0.00584  | ENSMUSG0000002977 | Hibadh      | protein_codi | 52546228 | 52640389 | upstream     | -32420 | 32185  | shortestDistance |
| chr6 | 52840616  | 52841119 | 504  | -1.15 | 0.00432  | 0.0223   | ENSMUSG0000006356 | Jazf1       | protein_codi | 52768797 | 53068631 | inside       | 227763 | 71819  | shortestDistance |
| chr6 | 52842610  | 52843006 | 397  | 1.05  | 0.00825  | 0.0367   | ENSMUSG0000006356 | Jazf1       | protein_codi | 52768797 | 53068631 | inside       | 225823 | 73813  | shortestDistance |
| chr6 | 52861196  | 52861733 | 538  | 3.02  | 9.94E-11 | 9.22E-09 | ENSMUSG0000006356 | Jazf1       | protein_codi | 52768797 | 53068631 | inside       | 207167 | 92399  | shortestDistance |
| chr6 | 53154538  | 53155020 | 483  | 2.43  | 2.79E-06 | 5.60E-05 | ENSMUSG0000010802 | Gm8143      | processed_pr | 53170550 | 53171735 | downstream   | 16956  | 15530  | shortestDistance |
| chr6 | 53369837  | 53370357 | 521  | 0.98  | 0.00788  | 0.0354   | ENSMUSG0000005300 | Creb5       | protein_codi | 53287270 | 53700376 | inside       | 82827  | 82567  | shortestDistance |
| chr6 | 53448250  | 53448889 | 640  | 1.05  | 0.0026   | 0.0151   | ENSMUSG0000005300 | Creb5       | protein_codi | 53287270 | 53700376 | inside       | 161300 | 160980 | shortestDistance |
| chr6 | 53571787  | 53572160 | 374  | 1.03  | 0.00533  | 0.0262   | ENSMUSG0000005300 | Creb5       | protein_codi | 53287270 | 53700376 | inside       | 284704 | 128216 | shortestDistance |
| chr6 | 53995521  | 53995992 | 472  | 4.02  | 6.97E-14 | 2.04E-11 | ENSMUSG0000010806 | 4921529L05f | processed_tr | 53978691 | 54018030 | inside       | 17065  | 16830  | shortestDistance |
| chr6 | 53996577  | 53997000 | 424  | 3.5   | 1.33E-10 | 1.18E-08 | ENSMUSG0000010806 | 4921529L05f | processed_tr | 53978691 | 54018030 | inside       | 18097  | 17886  | shortestDistance |
| chr6 | 54058766  | 54059361 | 596  | 1.55  | 5.49E-05 | 0.00682  | ENSMUSG0000000463 | Chn2        | protein_codi | 54039554 | 54301810 | inside       | 19510  | 19212  | shortestDistance |
| chr6 | 54082409  | 54083057 | 649  | 1.37  | 0.000337 | 0.00302  | ENSMUSG0000000463 | Chn2        | protein_codi | 54039554 | 54301810 | inside       | 43179  | 42555  | shortestDistance |
| chr6 | 54160654  | 54161042 | 389  | 1.46  | 6.82E-05 | 0.000816 | ENSMUSG0000000463 | Chn2        | protein_codi | 54039554 | 54301810 | inside       | 121294 | 121100 | shortestDistance |
| chr6 | 54718702  | 54719292 | 591  | 1.3   | 0.0011   | 0.00769  | ENSMUSG0000003806 | Mturn       | protein_codi | 54681624 | 54703851 | downstream   | 37373  | 14851  | shortestDistance |
| chr6 | 54789182  | 54789536 | 355  | 3.36  | 1.42E-09 | 8.67E-08 | ENSMUSG0000005844 | Znr2f       | protein_codi | 54816916 | 54893500 | upstream     | -27557 | 27380  | shortestDistance |
| chr6 | 54933914  | 54934225 | 312  | 1.23  | 0.0014   | 0.00932  | ENSMUSG0000003805 | Notd1       | protein_codi | 54923949 | 54972612 | inside       | 38542  | 9965   | shortestDistance |
| chr6 | 54946513  | 54946924 | 412  | 2.55  | 4.42E-07 | 1.18E-05 | ENSMUSG0000003805 | Notd1       | protein_codi | 54923949 | 54972612 | inside       | 25894  | 22564  | shortestDistance |
| chr6 | 54954647  | 54955030 | 384  | 1.11  | 0.00134  | 0.00901  | ENSMUSG0000003805 | Notd1       | protein_codi | 54923949 | 54972612 | inside       | 17774  | 17582  | shortestDistance |
| chr6 | 54955098  | 54955430 | 333  | 1.8   | 2.11E-05 | 0.00031  | ENSMUSG0000003805 | Notd1       | protein_codi | 54923949 | 54972612 | inside       | 17348  | 17182  | shortestDistance |
| chr6 | 54956336  | 54956899 | 564  | 1.09  | 0.00931  | 0.0402   | ENSMUSG0000003805 | Notd1       | protein_codi | 54923949 | 54972612 | inside       | 15994  | 15713  | shortestDistance |
| chr6 | 55256994  | 55257282 | 289  | 1.1   | 0.0114   | 0.0468   | ENSMUSG0000003802 | Mindy4      | protein_codi | 55203383 | 55320222 | inside       | 53755  | 53611  | shortestDistance |
| chr6 | 55294584  | 55295216 | 633  | -1.05 | 0.00467  | 0.0236   | ENSMUSG0000003802 | Mindy4      | protein_codi | 55203383 | 55320222 | inside       | 91517  | 25006  | shortestDistance |
| chr6 | 55731297  | 55731866 | 570  | -0.79 | 0.0107   | 0.0448   | ENSMUSG0000010806 | Gm3279      | lincRNA      | 55684571 | 55694574 | downstream   | 47011  | 36723  | shortestDistance |
| chr6 | 55779588  | 55779814 | 227  | -1.09 | 0.00722  | 0.0331   | ENSMUSG0000003797 | Cdc129      | protein_codi | 55836895 | 55978735 | upstream     | -57194 | 57081  | shortestDistance |
| chr6 | 55789244  | 55790693 | 1070 | -0.91 | 0.00676  | 0.0315   | ENSMUSG0000003797 | Cdc129      | protein_codi | 55836895 | 55978735 | upstream     | -46737 | 46202  | shortestDistance |
| chr6 | 55802645  | 55803341 | 697  | -0.92 | 0.0105   | 0.0439   | ENSMUSG0000003797 | Cdc129      | protein_codi | 55836895 | 55978735 | upstream     | -33902 | 33554  | shortestDistance |
| chr6 | 56110399  | 56110812 | 414  | -1.02 | 0.00705  | 0.0325   | ENSMUSG0000000434 | Pdc1c       | protein_codi | 56069804 | 56569103 | inside       | 458497 | 40595  | shortestDistance |
| chr6 | 56148372  | 56149087 | 716  | -1.18 | 0.000916 | 0.00665  | ENSMUSG0000000434 | Pdc1c       | protein_codi | 56069804 | 56569103 | inside       | 420373 | 78568  | shortestDistance |
| chr6 | 56361779  | 56362614 | 836  | -1    | 0.00273  | 0.0156   | ENSMUSG0000000434 | Pdc1c       | protein_codi | 56069804 | 56569103 | inside       | 206907 | 206489 | shortestDistance |
| chr6 | 56447985  | 56448247 | 263  | -1.84 | 6.00E-05 | 0.000737 | ENSMUSG0000000434 | Pdc1c       | protein_codi | 56069804 | 56569103 | inside       | 120987 | 120856 | shortestDistance |
| chr6 | 56476633  | 56476926 | 294  | -1.32 | 0.00106  | 0.00747  | ENSMUSG0000000434 | Pdc1c       | protein_codi | 56069804 | 56569103 | inside       | 92323  | 92177  | shortestDistance |
| chr6 | 56523824  | 56524488 | 665  | -1.03 | 0.00619  | 0.0294   | ENSMUSG0000000434 | Pdc1c       | protein_codi | 56069804 | 56569103 | inside       | 44947  | 44615  | shortestDistance |
| chr6 | 56551034  | 56551398 | 365  | -1.49 | 5.35E-05 | 0.000667 | ENSMUSG0000000434 | Pdc1c       | protein_codi | 56069804 | 56569103 | inside       | 17887  | 17705  | shortestDistance |
| chr6 | 56581555  | 56581981 | 1227 | -0.78 | 0.012    | 0.0487   | ENSMUSG0000000434 | Pdc1c       | protein_codi | 56069804 | 56569103 | overlapStart | 335    | 278    | shortestDistance |
| chr6 | 56583576  | 56583922 | 347  | -1.76 | 6.80E-05 | 0.000815 | ENSMUSG0000009608 | Gm24709     | snoRNA       | 56583715 | 56583846 | includeFeatu | 97     | 76     | shortestDistance |
| chr6 | 56616788  | 56617572 | 785  | -1.48 | 3.75E-06 | 7.19E-05 | ENSMUSG0000010749 | Gm8239      | lincRNA      | 56581203 | 56652487 | inside       | 35307  | 34915  | shortestDistance |
| chr6 | 56651958  | 56652865 | 908  | -1.38 | 4.50E-05 | 0.000558 | ENSMUSG0000010749 | Gm8239      | lincRNA      | 56581203 | 56652487 | overlapStart | 75     | 378    | shortestDistance |
| chr6 | 56753775  | 56754054 | 280  | -1.11 | 0.00577  | 0.0278   | ENSMUSG0000002978 | Av9         | protein_codi | 56714899 | 56761912 | inside       | 39015  | 7858   | shortestDistance |
| chr6 | 56760048  | 56760503 | 456  | -1.98 | 4.67E-07 | 1.24E-05 | ENSMUSG0000002978 | Av9         | protein_codi | 56714899 | 56761912 | inside       | 45377  | 1409   | shortestDistance |
| chr6 | 56760675  | 56761006 | 332  | -1.08 | 0.00881  | 0.0385   | ENSMUSG0000002978 | Av9         | protein_codi | 56714899 | 56761912 | inside       | 45941  | 906    | shortestDistance |
| chr6 | 56787657  | 56788137 | 481  | -1.37 | 0.00247  | 0.0145   | ENSMUSG0000005948 | kbtbd2      | protein_codi | 56777524 | 56797813 | inside       | 9916   | 9676   | shortestDistance |
| chr6 | 56878782  | 56880045 | 1264 | -1.04 | 0.00178  | 0.0113   | ENSMUSG0000002978 | Fkbp9       | protein_codi | 56832059 | 56879358 | overlapEnd   | 47355  | 576    | shortestDistance |
| chr6 | 56908435  | 56908840 | 406  | 1.26  | 0.000398 | 0.00345  | ENSMUSG0000002978 | Nt5c3       | protein_codi | 56882400 | 56923932 | inside       | 15294  | 15092  | shortestDistance |
| chr6 | 56913173  | 56914223 | 1051 | -0.93 | 0.00703  | 0.0324   | ENSMUSG0000002978 | Nt5c3       | protein_codi | 56882400 | 56923932 | inside       | 10234  | 9709   | shortestDistance |
| chr6 | 56934156  | 56934788 | 633  | -1.89 | 8.08E-05 | 0.000934 | ENSMUSG0000007189 | Vmn1r4      | protein_codi | 56924015 | 56958100 | inside       | 10457  | 10141  | shortestDistance |
| chr6 | 57063775  | 57064091 | 317  | -1.13 | 0.00374  | 0.0199   | ENSMUSG0000009154 | Vmn1r9      | protein_codi | 57066787 | 57074906 | upstream     | -2854  | 2696   | shortestDistance |
| chr6 | 57106413  | 57106706 | 294  | -1.05 | 0.00398  | 0.0209   | ENSMUSG0000011518 | Vmn1r10     | unprocessed  | 57109454 | 57115035 | upstream     | -2894  | 2748   | shortestDistance |
| chr6 | 57271144  | 57272316 | 1173 | -2.01 | 5.49E-07 | 1.41E-05 | ENSMUSG0000009352 | Vmn1r-ps9   | unprocessed  | 57278022 | 57278379 | upstream     | -6292  | 5706   | shortestDistance |
| chr6 | 57272465  | 57272866 | 402  | -2.17 | 5.38E-09 | 2.72E-07 | ENSMUSG0000009352 | Vmn1r-ps9   | unprocessed  | 57278022 | 57278379 | upstream     | -5356  | 5156   | shortestDistance |
| chr6 | 57582436  | 57582687 | 252  | -0.98 | 0.00296  | 0.0167   | ENSMUSG0000002979 | Herc6       | protein_codi | 57581000 | 57664632 | inside       | 1562   | 1436   | shortestDistance |
| chr6 | 57641681  | 57642247 | 567  | -1.32 | 6.41E-05 | 0.000777 | ENSMUSG0000002979 | Herc6       | protein_codi | 57581000 | 57664632 | inside       | 60964  | 22385  | shortestDistance |
| chr6 | 57702381  | 57703547 | 1167 | -0.75 | 0.0102   | 0.0431   | ENSMUSG0000006219 | Land2       | protein_codi | 57702540 | 57739439 | overlapStart | 424    | 159    | shortestDistance |
| chr6 | 57711733  | 57712195 | 463  | -1.36 | 0.000407 | 0.00351  | ENSMUSG0000006219 | Land2       | protein_codi | 57702540 | 57739439 | inside       | 9424   | 9193   | shortestDistance |
| chr6 | 57743390  | 57743663 | 274  | -1.25 | 0.000165 | 0.00169  | ENSMUSG0000003778 | Vopp1       | protein_codi | 57727807 | 57825159 | inside       | 81633  | 15583  | shortestDistance |
| chr6 | 57745294  | 57745858 | 565  | -1.36 | 0.000114 | 0.00124  | ENSMUSG0000003778 | Vopp1       | protein_codi | 57727807 | 57825159 | inside       | 79583  | 17487  | shortestDistance |
| chr6 | 57768940  | 57769539 | 600  | 1.31  | 0.00137  | 0.00917  | ENSMUSG0000003778 | Vopp1       | protein_codi | 57727807 | 57825159 | inside       | 55919  | 41133  | shortestDistance |
| chr6 | 57824189  | 57825330 | 1142 | -0.97 | 0.000953 | 0.00687  | ENSMUSG0000003778 | Vopp1       | protein_codi | 57727807 | 57825159 | overlapStart | 399    | 1      |                  |

|      |          |          |      |       |          |          |                    |             |              |          |          |              |         |        |                  |
|------|----------|----------|------|-------|----------|----------|--------------------|-------------|--------------|----------|----------|--------------|---------|--------|------------------|
| chr6 | 61292738 | 61293531 | 794  | -1.06 | 0.000526 | 0.00429  | ENSMUSG0000003957  | Ccser1      | protein_codi | 61180324 | 62382865 | inside       | 112810  | 112414 | shortestDistance |
| chr6 | 61295484 | 61295932 | 449  | -1.4  | 1.12E-05 | 0.000182 | ENSMUSG0000003957  | Ccser1      | protein_codi | 61180324 | 62382865 | inside       | 115384  | 115160 | shortestDistance |
| chr6 | 61311367 | 61311969 | 603  | 1.26  | 0.00125  | 0.00849  | ENSMUSG0000003957  | Ccser1      | protein_codi | 61180324 | 62382865 | inside       | 131344  | 131043 | shortestDistance |
| chr6 | 61364506 | 61364960 | 455  | -1.8  | 9.25E-06 | 0.000155 | ENSMUSG0000003957  | Ccser1      | protein_codi | 61180324 | 62382865 | inside       | 184409  | 184182 | shortestDistance |
| chr6 | 61878891 | 61879221 | 331  | -2.3  | 3.54E-07 | 9.78E-06 | ENSMUSG0000003957  | Ccser1      | protein_codi | 61180324 | 62382865 | inside       | 698732  | 503644 | shortestDistance |
| chr6 | 62014642 | 62014915 | 274  | -2.05 | 1.33E-05 | 0.00021  | ENSMUSG0000003957  | Ccser1      | protein_codi | 61180324 | 62382865 | inside       | 834454  | 367950 | shortestDistance |
| chr6 | 62576238 | 62576587 | 350  | -2.4  | 9.47E-09 | 4.46E-07 | ENSMUSG0000010816  | Gm19237     | processed_p  | 62582070 | 62583201 | upstream     | -5658   | 5483   | shortestDistance |
| chr6 | 63255889 | 63257982 | 2094 | -1.14 | 0.000495 | 0.0041   | ENSMUSG0000007142  | Grid2       | protein_codi | 63255876 | 64704323 | inside       | 1060    | 13     | shortestDistance |
| chr6 | 64313038 | 64313452 | 415  | -2.01 | 2.91E-06 | 5.80E-05 | ENSMUSG0000007142  | Grid2       | protein_codi | 63255876 | 64704323 | inside       | 1057369 | 390871 | shortestDistance |
| chr6 | 64427623 | 64428472 | 850  | -1.93 | 0.00247  | 0.0145   | ENSMUSG0000007142  | Grid2       | protein_codi | 63255876 | 64704323 | inside       | 1172172 | 275851 | shortestDistance |
| chr6 | 64504467 | 64504796 | 330  | -2.14 | 0.00019  | 0.0019   | ENSMUSG0000007142  | Grid2       | protein_codi | 63255876 | 64704323 | inside       | 1248756 | 199527 | shortestDistance |
| chr6 | 64568656 | 64568932 | 277  | -2.18 | 1.42E-06 | 3.14E-05 | ENSMUSG0000007142  | Grid2       | protein_codi | 63255876 | 64704323 | inside       | 1312918 | 135391 | shortestDistance |
| chr6 | 64608021 | 64608257 | 237  | -2.59 | 7.51E-07 | 1.84E-05 | ENSMUSG0000007142  | Grid2       | protein_codi | 63255876 | 64704323 | inside       | 1352263 | 96066  | shortestDistance |
| chr6 | 64649576 | 64650256 | 681  | -1.12 | 0.000604 | 0.00479  | ENSMUSG0000007142  | Grid2       | protein_codi | 63255876 | 64704323 | inside       | 1394040 | 54067  | shortestDistance |
| chr6 | 64684929 | 64685300 | 372  | -0.9  | 0.00884  | 0.0386   | ENSMUSG0000007142  | Grid2       | protein_codi | 63255876 | 64704323 | inside       | 1492938 | 19023  | shortestDistance |
| chr6 | 64705949 | 64706425 | 477  | -1.24 | 0.00182  | 0.0114   | ENSMUSG0000007142  | Grid2       | protein_codi | 63255876 | 64704323 | downstream   | 1450311 | 1626   | shortestDistance |
| chr6 | 64727570 | 64728415 | 846  | -1.06 | 0.00123  | 0.00841  | ENSMUSG0000007304  | Atoh1       | protein_codi | 64729125 | 64731245 | upstream     | -1133   | 710    | shortestDistance |
| chr6 | 64728917 | 64729232 | 316  | -1.12 | 0.0014   | 0.0093   | ENSMUSG0000007304  | Atoh1       | protein_codi | 64729125 | 64731245 | overlapStart | -51     | 107    | shortestDistance |
| chr6 | 64729364 | 64730133 | 770  | -1.28 | 9.90E-05 | 0.0011   | ENSMUSG0000007304  | Atoh1       | protein_codi | 64729125 | 64731245 | inside       | 623     | 239    | shortestDistance |
| chr6 | 64734431 | 64735033 | 603  | -1.13 | 0.00289  | 0.0163   | ENSMUSG0000007304  | Atoh1       | protein_codi | 64729125 | 64731245 | downstream   | 5607    | 3186   | shortestDistance |
| chr6 | 65140783 | 65141271 | 489  | -0.92 | 0.00681  | 0.0316   | ENSMUSG0000002991  | Hpgds       | protein_codi | 65117293 | 65144908 | inside       | 3881    | 3637   | shortestDistance |
| chr6 | 65525185 | 65525576 | 392  | -1.84 | 7.27E-06 | 0.000126 | ENSMUSG00000004416 | Trnp3       | protein_codi | 65525313 | 65634040 | overlapStart | 67      | 128    | shortestDistance |
| chr6 | 65573488 | 65573851 | 364  | -1.71 | 6.50E-06 | 0.000115 | ENSMUSG00000004416 | Trnp3       | protein_codi | 65525313 | 65634040 | inside       | 48357   | 48175  | shortestDistance |
| chr6 | 65582968 | 65583411 | 444  | -1.12 | 0.00387  | 0.0204   | ENSMUSG00000004416 | Trnp3       | protein_codi | 65525313 | 65634040 | inside       | 57877   | 50629  | shortestDistance |
| chr6 | 65615747 | 65615990 | 244  | -1.05 | 0.0108   | 0.0451   | ENSMUSG00000004416 | Trnp3       | protein_codi | 65525313 | 65634040 | inside       | 90555   | 18050  | shortestDistance |
| chr6 | 65647553 | 65648166 | 614  | -1.01 | 0.00225  | 0.0135   | ENSMUSG00000004416 | Trnp3       | protein_codi | 65525313 | 65634040 | downstream   | 125447  | 13513  | shortestDistance |
| chr6 | 65661328 | 65661661 | 334  | -1    | 0.00779  | 0.0351   | ENSMUSG00000004900 | Ndnf        | protein_codi | 65671590 | 65712326 | upstream     | -10096  | 9929   | shortestDistance |
| chr6 | 65672075 | 65673179 | 1105 | -0.82 | 0.00785  | 0.0353   | ENSMUSG00000004900 | Ndnf        | protein_codi | 65671590 | 65712326 | inside       | 1037    | 485    | shortestDistance |
| chr6 | 65998390 | 65998709 | 320  | -1.68 | 4.52E-05 | 0.000582 | ENSMUSG0000010810  | Gm5876      | processed_p  | 65995637 | 65996330 | downstream   | 2913    | 2060   | shortestDistance |
| chr6 | 66068832 | 66069263 | 432  | -1.51 | 1.78E-05 | 0.000268 | ENSMUSG0000010810  | Gm5876      | processed_p  | 65995637 | 65996330 | downstream   | 73411   | 72502  | shortestDistance |
| chr6 | 66200078 | 66200746 | 669  | -1.88 | 2.18E-08 | 9.11E-07 | ENSMUSG0000010769  | Gm44289     | processed_p  | 66254743 | 66258205 | upstream     | -54331  | 53997  | shortestDistance |
| chr6 | 66206491 | 66207022 | 532  | -1.51 | 0.00887  | 0.0387   | ENSMUSG0000010769  | Gm44289     | processed_p  | 66254743 | 66258205 | upstream     | -47987  | 47721  | shortestDistance |
| chr6 | 66217382 | 66218248 | 867  | -1.03 | 0.007    | 0.0323   | ENSMUSG0000010769  | Gm44289     | processed_p  | 66254743 | 66258205 | upstream     | -36928  | 36495  | shortestDistance |
| chr6 | 66346573 | 66347960 | 1388 | -0.91 | 0.00326  | 0.0179   | ENSMUSG0000010783  | Gm44281     | processed_p  | 66398551 | 66398716 | downstream   | 51450   | 50591  | shortestDistance |
| chr6 | 66367265 | 66367799 | 535  | -2.76 | 3.00E-10 | 2.31E-08 | ENSMUSG0000010783  | Gm44281     | processed_p  | 66398551 | 66398716 | downstream   | 31184   | 30752  | shortestDistance |
| chr6 | 66398823 | 66399045 | 223  | -1.82 | 3.15E-05 | 0.000431 | ENSMUSG0000010763  | Gm44233     | processed_p  | 66398746 | 66398971 | overlapEnd   | 188     | 74     | shortestDistance |
| chr6 | 66401726 | 66402335 | 610  | -1.9  | 7.89E-07 | 1.92E-05 | ENSMUSG0000010763  | Gm44233     | processed_p  | 66398746 | 66398971 | downstream   | 3284    | 2755   | shortestDistance |
| chr6 | 66414829 | 66415239 | 411  | -1.08 | 0.00318  | 0.0176   | ENSMUSG0000010763  | Gm44233     | processed_p  | 66398746 | 66398971 | downstream   | 16288   | 15858  | shortestDistance |
| chr6 | 66482275 | 66483243 | 459  | -1.42 | 0.00022  | 0.00213  | ENSMUSG0000010747  | 2610300M13  | lincRNA      | 66451949 | 66465738 | upstream     | -17276  | 17047  | shortestDistance |
| chr6 | 66927512 | 66927814 | 303  | 1.02  | 0.00452  | 0.023    | ENSMUSG0000003640  | Gng12       | protein_codi | 66896397 | 67021350 | inside       | 31266   | 31115  | shortestDistance |
| chr6 | 67027482 | 67028185 | 704  | 1.92  | 3.67E-07 | 1.01E-05 | ENSMUSG0000006498  | Gm25260     | snRNA        | 67027043 | 67027176 | downstream   | 791     | 306    | shortestDistance |
| chr6 | 67146715 | 67147155 | 441  | -1.5  | 7.12E-05 | 0.000844 | ENSMUSG0000009760  | A43001010F  | processed_tr | 67115673 | 67168426 | inside       | 31262   | 21271  | shortestDistance |
| chr6 | 67161679 | 67162013 | 335  | -1.34 | 0.00055  | 0.0268   | ENSMUSG0000009760  | A43001010F  | processed_tr | 67115673 | 67168426 | inside       | 46173   | 6413   | shortestDistance |
| chr6 | 67347902 | 67348443 | 542  | -1.03 | 0.012    | 0.0488   | ENSMUSG0000001834  | I12rb2      | protein_codi | 67291318 | 67376188 | inside       | 28016   | 27745  | shortestDistance |
| chr6 | 67565512 | 67566621 | 1086 | -1.11 | 0.00081  | 0.06064  | ENSMUSG0000010481  | 4930515G16  | processed_p  | 67565191 | 67566446 | overlapStart | 368     | 175    | shortestDistance |
| chr6 | 67754145 | 67754442 | 298  | -1.43 | 0.000382 | 0.00334  | ENSMUSG0000010640  | Gm43284     | IG_V_pseud   | 67754746 | 67754998 | upstream     | -452    | 304    | shortestDistance |
| chr6 | 67812357 | 67812838 | 482  | -1.04 | 0.00279  | 0.0159   | ENSMUSG0000008791  | Gm24911     | snRNA        | 67804375 | 67804510 | upstream     | -8088   | 7847   | shortestDistance |
| chr6 | 68668457 | 68668943 | 487  | -1.01 | 0.0037   | 0.0197   | ENSMUSG0000010638  | lglkv2-95-1 | IG_V_pseud   | 68671162 | 68671883 | upstream     | -2462   | 2219   | shortestDistance |
| chr6 | 70103160 | 70103966 | 747  | -1.79 | 6.78E-06 | 0.000119 | ENSMUSG0000010578  | lglkv8-31   | IG_V_pseud   | 70105860 | 70106415 | downstream   | 2882    | 1954   | shortestDistance |
| chr6 | 70116694 | 70117159 | 466  | -1.09 | 0.00388  | 0.0205   | ENSMUSG0000007657  | lglkv8-30   | IG_V_gene    | 70117061 | 70117620 | overlapEnd   | 694     | 98     | shortestDistance |
| chr6 | 70314444 | 70315207 | 764  | -1.16 | 0.000595 | 0.00474  | ENSMUSG0000007657  | lglkv8-21   | IG_V_gene    | 70314895 | 70315472 | overlapEnd   | 646     | 265    | shortestDistance |
| chr6 | 70709272 | 70709978 | 707  | -1.02 | 0.00177  | 0.0112   | ENSMUSG0000009568  | lglkv3-1    | IG_V_gene    | 70703578 | 70704177 | downstream   | 6047    | 5095   | shortestDistance |
| chr6 | 70768771 | 70769153 | 383  | -0.87 | 0.00635  | 0.03     | ENSMUSG0000005360  | Rpia        | protein_codi | 70765720 | 70792232 | inside       | 23270   | 3051   | shortestDistance |
| chr6 | 70855443 | 70856541 | 1099 | 1.57  | 2.86E-05 | 0.000398 | ENSMUSG0000006575  | Gm23346     | snRNA        | 70855444 | 70855579 | includeFeatu | 548     | 1      | shortestDistance |
| chr6 | 71048078 | 71049185 | 1108 | -1.02 | 0.00115  | 0.00796  | ENSMUSG0000007736  | Gm23485     | snRNA        | 71039579 | 71039733 | upstream     | -8899   | 8345   | shortestDistance |
| chr6 | 71298842 | 71299095 | 254  | 1.31  | 0.00467  | 0.0236   | ENSMUSG0000007301  | Gm1070      | lincRNA      | 71293765 | 71302880 | inside       | 5203    | 3785   | shortestDistance |
| chr6 | 71418894 | 71419326 | 433  | 1.3   | 0.00161  | 0.0104   | ENSMUSG0000002281  | Rmnd5a      | protein_codi | 71388634 | 71440637 | inside       | 21527   | 21311  | shortestDistance |
| chr6 | 71757048 | 71757919 | 872  | 0.97  | 0.00625  | 0.0296   | ENSMUSG0000005285  | Reep1       | protein_codi | 71707561 | 71810710 | inside       | 49923   | 49487  | shortestDistance |
| chr6 | 72029596 | 72030091 | 496  | -1.09 | 0.00413  | 0.0215   | ENSMUSG0000010835  | 9130221F21  | lincRNA      | 72013896 | 72042528 | inside       | 12684   | 12437  | shortestDistance |
| chr6 | 72037542 | 72038000 | 459  | 2.15  | 2.68E-07 | 7.72E-06 | ENSMUSG0000010835  | 9130221F21  | lincRNA      | 72013896 | 72042528 | inside       | 4757    | 4528   | shortestDistance |
| chr6 | 72333187 | 72333633 | 447  | 2.39  | 3.01E-07 | 8.52E-06 | ENSMUSG0000005630  | Usp39       | protein_codi | 72318678 | 72345184 | inside       | 11774   | 11551  | shortestDistance |
| chr6 | 72438866 | 72440231 | 1366 | 0.77  | 0.0103   | 0.0434   | ENSMUSG0000010859  | Particl     | TEC          | 72439051 | 72440610 | overlapStart | 497     | 185    | shortestDistance |
| chr6 | 72624032 | 72624409 | 378  | 1.58  | 0.000164 | 0.00168  | ENSMUSG0000005579  | Tcf7l1      | protein_codi | 72626378 | 72789254 | downstream   | 165034  | 1969   | shortestDistance |
| chr6 | 72745785 | 72746086 | 302  | -1.19 | 0.00257  | 0.0149   | ENSMUSG0000005579  | Tcf7l1      | protein_codi | 72626378 | 72789254 | inside       | 43318   | 43168  | shortestDistance |
| chr6 | 72810200 | 72810822 | 623  | -0.89 | 0.00463  | 0.0234   | ENSMUSG0000005579  | Tcf7l1      | protein_codi | 72626378 | 72789254 | upstream     | -21257  | 20946  | shortestDistance |
| chr6 | 72929734 | 72930115 | 382  | 2.5   | 2.42E-07 | 7.09E-06 | ENSMUSG0000009576  | Gm26640     | lincRNA      | 72953236 | 72957247 | upstream     | -23312  | 23121  | shortestDistance |
| chr6 | 73182441 | 73182871 | 431  | 1.3   | 0.00217  | 0.0131   | ENSMUSG0000005286  | DnaH6       | protein_codi | 73017606 | 73221651 | inside       | 38995   | 38780  | shortestDistance |
| chr6 | 73228298 | 73229324 | 1027 | 1.3   | 8.89E-05 | 0.00101  | ENSMUSG0000010744  | Gm40377     | TEC          | 73223050 | 73225064 | downstream   | 5761    | 3234   | shortestDistance |
| chr6 | 73247521 | 73247776 | 256  | 1.02  | 0.00448  | 0.0229   | ENSMUSG0000005273  | Suc1g1      | protein_codi | 73248382 | 73276911 | upstream     | -734    | 606    | shortestDistance |
| chr6 | 73260035 | 73260970 | 436  | 1.63  | 0.000375 | 0.00329  | ENSMUSG0000005273  | Suc1g1      | protein_codi | 73248382 | 73276911 | inside       | 12370   | 12153  | shortestDistance |
| chr6 | 73279698 | 73279962 | 265  | -1.27 | 0.00075  | 0.034    | ENSMUSG0000005273  | Suc1g1      |              |          |          |              |         |        |                  |

|      |          |          |      |       |          |          |                    |             |              |          |          |              |        |        |                  |
|------|----------|----------|------|-------|----------|----------|--------------------|-------------|--------------|----------|----------|--------------|--------|--------|------------------|
| chr6 | 82127848 | 82128251 | 404  | -2.54 | 2.48E-06 | 5.06E-05 | ENSMUSG0000003510  | Eva1a       | protein_codi | 82041043 | 82093099 | downstream   | 87007  | 34749  | shortestDistance |
| chr6 | 82419222 | 82419716 | 495  | -1.49 | 0.00128  | 0.00869  | ENSMUSG0000003004  | Tac1r1      | protein_codi | 82402334 | 82560104 | inside       | 17135  | 16888  | shortestDistance |
| chr6 | 82773286 | 82773899 | 614  | 0.92  | 0.00519  | 0.0256   | ENSMUSG0000000062  | Hk2         | protein_codi | 82725025 | 82774454 | inside       | 862    | 555    | shortestDistance |
| chr6 | 82793286 | 82798242 | 924  | 1.29  | 0.00157  | 0.0102   | ENSMUSG0000010955  | Gm38843     | lincRNA      | 82803769 | 82805083 | downstream   | 7303   | 5527   | shortestDistance |
| chr6 | 82835587 | 82835994 | 408  | 1.69  | 3.82E-05 | 0.000506 | ENSMUSG0000010801  | Gm32591     | lincRNA      | 82823214 | 82841371 | inside       | 12576  | 5377   | shortestDistance |
| chr6 | 82915961 | 82916189 | 229  | 1.05  | 0.0105   | 0.0441   | ENSMUSG0000000062  | Sema4f      | protein_codi | 82911885 | 82939769 | inside       | 23694  | 4076   | shortestDistance |
| chr6 | 83006046 | 83006461 | 416  | 0.94  | 0.00445  | 0.0228   | ENSMUSG0000003004  | M1ap        | protein_codi | 82946902 | 83030309 | inside       | 59352  | 23848  | shortestDistance |
| chr6 | 83014525 | 83014780 | 256  | -1.61 | 0.00052  | 0.00426  | ENSMUSG0000003004  | M1ap        | protein_codi | 82946902 | 83030309 | inside       | 67750  | 15529  | shortestDistance |
| chr6 | 83131521 | 83132107 | 587  | 2.57  | 1.76E-09 | 1.05E-07 | ENSMUSG0000003493  | Rtkn        | protein_codi | 83135463 | 83152579 | upstream     | -3649  | 3356   | shortestDistance |
| chr6 | 83159494 | 83159770 | 277  | 1.2   | 0.00301  | 0.0169   | ENSMUSG0000003003  | 1700003E161 | protein_codi | 83156404 | 83162945 | inside       | 3228   | 3090   | shortestDistance |
| chr6 | 83473087 | 83473685 | 599  | -1.12 | 0.00149  | 0.00975  | ENSMUSG0000001455  | Dguok       | protein_codi | 83480217 | 83506969 | downstream   | 33583  | 6532   | shortestDistance |
| chr6 | 83482225 | 83482945 | 721  | 1.1   | 0.00109  | 0.00764  | ENSMUSG0000001455  | Dguok       | protein_codi | 83480217 | 83506969 | inside       | 24384  | 2008   | shortestDistance |
| chr6 | 84191692 | 84192022 | 331  | -1.66 | 0.000338 | 0.00302  | ENSMUSG0000003378  | Dysf        | protein_codi | 84008590 | 84211060 | inside       | 183267 | 19038  | shortestDistance |
| chr6 | 84568642 | 84569332 | 691  | 1.17  | 0.00197  | 0.0122   | ENSMUSG0000006341  | Cyp26b1     | protein_codi | 84571414 | 84593908 | downstream   | 24921  | 2082   | shortestDistance |
| chr6 | 84569581 | 84570016 | 436  | 0.9   | 0.006    | 0.0287   | ENSMUSG0000006341  | Cyp26b1     | protein_codi | 84571414 | 84593908 | downstream   | 24110  | 1398   | shortestDistance |
| chr6 | 84923701 | 84924244 | 544  | -1.36 | 0.00045  | 0.0038   | ENSMUSG0000010801  | Gm44012     | antisense_RI | 84921123 | 84924996 | inside       | 2849   | 752    | shortestDistance |
| chr6 | 85325110 | 85325517 | 408  | 1.11  | 0.00779  | 0.0351   | ENSMUSG0000003372  | Sfxn5       | protein_codi | 85213049 | 85333422 | inside       | 8108   | 7905   | shortestDistance |
| chr6 | 85433892 | 85434238 | 347  | 1.51  | 0.000229 | 0.00221  | ENSMUSG0000003370  | Smyd5       | protein_codi | 85431989 | 85446435 | inside       | 2076   | 1903   | shortestDistance |
| chr6 | 85513508 | 85513933 | 426  | 0.96  | 0.00856  | 0.0377   | ENSMUSG0000007134  | Egr4        | protein_codi | 85511121 | 85513589 | overlapStart | -131   | 81     | shortestDistance |
| chr6 | 86019818 | 86020252 | 435  | 1.42  | 0.000531 | 0.00432  | ENSMUSG0000003000  | Figla       | protein_codi | 86016171 | 86020996 | inside       | 3864   | 744    | shortestDistance |
| chr6 | 86365300 | 86366106 | 807  | 0.86  | 0.00407  | 0.0212   | ENSMUSG0000005749  | Fam136a     | protein_codi | 86365646 | 86370058 | overlapStart | 57     | 346    | shortestDistance |
| chr6 | 86487212 | 86488314 | 1103 | 1.05  | 0.00114  | 0.00793  | ENSMUSG0000010165  | 2310040624  | lincRNA      | 86483376 | 86488227 | overlapStart | 464    | 87     | shortestDistance |
| chr6 | 86509805 | 86510058 | 254  | 1.39  | 0.01     | 0.0425   | ENSMUSG0000010768  | Gm44386     | lincRNA      | 86513891 | 86516273 | downstream   | 6341   | 3833   | shortestDistance |
| chr6 | 86525893 | 86527401 | 1509 | 0.98  | 0.00176  | 0.0111   | ENSMUSG0000009704  | 1600020E011 | antisense_RI | 86526247 | 86582466 | overlapStart | 400    | 354    | shortestDistance |
| chr6 | 86570717 | 86571202 | 486  | 1.8   | 2.45E-06 | 5.00E-05 | ENSMUSG0000009704  | 1600020E011 | antisense_RI | 86526247 | 86582466 | inside       | 44713  | 11264  | shortestDistance |
| chr6 | 86579292 | 86579699 | 408  | 1.74  | 0.000191 | 0.0019   | ENSMUSG0000009704  | 1600020E011 | antisense_RI | 86526247 | 86582466 | inside       | 53249  | 2767   | shortestDistance |
| chr6 | 86593089 | 86593883 | 795  | 1.68  | 3.77E-07 | 1.03E-05 | ENSMUSG0000010805  | Gm44369     | TEC          | 86591430 | 86593604 | overlapEnd   | 2056   | 279    | shortestDistance |
| chr6 | 86609211 | 86609634 | 424  | 1.7   | 3.71E-06 | 7.12E-05 | ENSMUSG0000010805  | Gm44369     | TEC          | 86591430 | 86593604 | downstream   | 17992  | 15607  | shortestDistance |
| chr6 | 86620006 | 86620379 | 374  | 1.84  | 0.0013   | 0.00879  | ENSMUSG0000003350  | Asprv1      | protein_codi | 86628164 | 86629710 | upstream     | -7972  | 7785   | shortestDistance |
| chr6 | 86639159 | 86639673 | 515  | 2.95  | 6.54E-11 | 6.43E-09 | ENSMUSG00000000115 | Mxd1        | protein_codi | 86647042 | 86669161 | downstream   | 29745  | 7369   | shortestDistance |
| chr6 | 86806502 | 86806766 | 265  | 1.23  | 0.011    | 0.0455   | ENSMUSG0000002999  | Anxa4       | protein_codi | 86736840 | 86793584 | upstream     | -13050 | 12918  | shortestDistance |
| chr6 | 87026926 | 87027400 | 475  | 2.74  | 1.88E-08 | 8.06E-07 | ENSMUSG0000002999  | Nfu1        | protein_codi | 87009236 | 87028461 | inside       | 17927  | 1061   | shortestDistance |
| chr6 | 87084985 | 87085485 | 501  | 1.88  | 9.03E-05 | 0.00102  | ENSMUSG0000002999  | Gfp1p1      | protein_codi | 87042846 | 87092197 | inside       | 42389  | 6712   | shortestDistance |
| chr6 | 87259073 | 87259433 | 361  | 1.1   | 0.0114   | 0.047    | ENSMUSG0000003342  | Antr1       | protein_codi | 87133853 | 87335821 | inside       | 76568  | 76388  | shortestDistance |
| chr6 | 87328346 | 87328687 | 342  | 2.57  | 6.03E-07 | 1.53E-05 | ENSMUSG0000003342  | Antr1       | protein_codi | 87133853 | 87335821 | inside       | 7305   | 7134   | shortestDistance |
| chr6 | 87532916 | 87533437 | 522  | 1.02  | 0.00987  | 0.042    | ENSMUSG0000003004  | Arhgap25    | protein_codi | 87458545 | 87533259 | overlapStart | 83     | 178    | shortestDistance |
| chr6 | 87654170 | 87654595 | 426  | -1.31 | 0.00303  | 0.0169   | ENSMUSG0000003005  | Ap1f        | protein_codi | 87628424 | 87672193 | inside       | 17811  | 17598  | shortestDistance |
| chr6 | 87887536 | 87888271 | 736  | 0.83  | 0.00967  | 0.0414   | ENSMUSG0000003005  | Copg1       | protein_codi | 87887814 | 87913595 | overlapStart | 90     | 278    | shortestDistance |
| chr6 | 88068779 | 88069111 | 333  | 1.26  | 0.00142  | 0.00943  | ENSMUSG0000003006  | Rpn1        | protein_codi | 88084482 | 88105304 | upstream     | -15537 | 15371  | shortestDistance |
| chr6 | 88116426 | 88117503 | 1078 | 0.9   | 0.00428  | 0.0221   | ENSMUSG0000003006  | Rpn1        | protein_codi | 88084482 | 88105304 | downstream   | 32482  | 11122  | shortestDistance |
| chr6 | 88123258 | 88123839 | 582  | 1.37  | 0.000245 | 0.00232  | ENSMUSG0000003006  | Rpn1        | protein_codi | 88084482 | 88105304 | downstream   | 39066  | 17954  | shortestDistance |
| chr6 | 88136077 | 88136632 | 556  | 1.19  | 0.00445  | 0.0228   | ENSMUSG0000003006  | Rpn1        | protein_codi | 88084482 | 88105304 | downstream   | 51872  | 30773  | shortestDistance |
| chr6 | 88165840 | 88166460 | 621  | 0.91  | 0.0109   | 0.0453   | ENSMUSG0000010801  | Gm38708     | lincRNA      | 88188397 | 88190681 | downstream   | 24531  | 21937  | shortestDistance |
| chr6 | 88181805 | 88182140 | 336  | 1.92  | 3.36E-05 | 0.000456 | ENSMUSG0000010801  | Gm38708     | lincRNA      | 88188397 | 88190681 | downstream   | 8709   | 6257   | shortestDistance |
| chr6 | 88416418 | 88416785 | 368  | 1.35  | 0.00173  | 0.011    | ENSMUSG0000003321  | Efcsec      | protein_codi | 88257334 | 88446539 | inside       | 29937  | 29754  | shortestDistance |
| chr6 | 88860941 | 88861385 | 445  | 1.17  | 0.000783 | 0.00587  | ENSMUSG0000003315  | Podx12      | protein_codi | 88842558 | 88875044 | inside       | 13881  | 13659  | shortestDistance |
| chr6 | 88939143 | 88939940 | 798  | -1.06 | 0.000844 | 0.00624  | ENSMUSG0000005540  | 4933427D061 | lincRNA      | 88950683 | 89110031 | upstream     | -11141 | 10743  | shortestDistance |
| chr6 | 89050467 | 89050958 | 492  | 1.77  | 7.33E-05 | 0.000864 | ENSMUSG0000005540  | 4933427D061 | lincRNA      | 88950683 | 89110031 | inside       | 100029 | 59073  | shortestDistance |
| chr6 | 89257481 | 89257761 | 281  | -1.03 | 0.00882  | 0.0386   | ENSMUSG0000010773  | Gm44204     | lincRNA      | 89257820 | 89259136 | downstream   | 1515   | 59     | shortestDistance |
| chr6 | 89259661 | 89260062 | 402  | -1.07 | 0.00408  | 0.0213   | ENSMUSG0000010773  | Gm44204     | lincRNA      | 89257820 | 89259136 | upstream     | -726   | 525    | shortestDistance |
| chr6 | 89272094 | 89272531 | 438  | -1.73 | 8.57E-06 | 0.000145 | ENSMUSG0000010762  | 4930512116f | lincRNA      | 89269511 | 89285725 | inside       | 13413  | 2583   | shortestDistance |
| chr6 | 89280387 | 89281002 | 616  | 1.61  | 3.91E-05 | 0.000516 | ENSMUSG0000010762  | 4930512116f | lincRNA      | 89269511 | 89285725 | inside       | 5031   | 4723   | shortestDistance |
| chr6 | 89344777 | 89345544 | 768  | -1.32 | 0.00243  | 0.0143   | ENSMUSG0000010757  | Gm44207     | TEC          | 89345140 | 89346563 | overlapStart | 20     | 363    | shortestDistance |
| chr6 | 90319479 | 90319993 | 515  | 2.7   | 3.97E-10 | 2.93E-08 | ENSMUSG0000005664  | Chst13      | protein_codi | 90308349 | 90325185 | inside       | 5449   | 5192   | shortestDistance |
| chr6 | 90320361 | 90320835 | 475  | 2.35  | 2.46E-09 | 1.40E-07 | ENSMUSG0000005664  | Chst13      | protein_codi | 90308349 | 90325185 | inside       | 4587   | 4350   | shortestDistance |
| chr6 | 90334158 | 90334735 | 578  | -1.44 | 3.02E-05 | 0.000416 | ENSMUSG0000003445  | Uroc1       | protein_codi | 90333284 | 90364551 | inside       | 1162   | 874    | shortestDistance |
| chr6 | 90476943 | 90477649 | 707  | -0.99 | 0.00173  | 0.011    | ENSMUSG0000010745  | Gm44421     | lincRNA      | 90478466 | 90479686 | upstream     | -1170  | 817    | shortestDistance |
| chr6 | 90494177 | 90494512 | 336  | -1.13 | 0.00392  | 0.0206   | ENSMUSG0000003008  | Aldh11      | protein_codi | 90486427 | 90600203 | inside       | 7917   | 7750   | shortestDistance |
| chr6 | 90750117 | 90750418 | 302  | 2.45  | 1.24E-09 | 7.75E-08 | ENSMUSG0000003431  | Iqsec1      | protein_codi | 90656088 | 90988685 | inside       | 238417 | 94029  | shortestDistance |
| chr6 | 90751484 | 90752021 | 538  | 2.12  | 4.31E-06 | 8.10E-05 | ENSMUSG0000003431  | Iqsec1      | protein_codi | 90656088 | 90988685 | inside       | 236933 | 95396  | shortestDistance |
| chr6 | 90754156 | 90754531 | 376  | 3.29  | 1.73E-09 | 1.03E-07 | ENSMUSG0000003431  | Iqsec1      | protein_codi | 90656088 | 90988685 | inside       | 234341 | 98068  | shortestDistance |
| chr6 | 90754764 | 90755250 | 487  | 2     | 4.42E-06 | 8.28E-05 | ENSMUSG0000003431  | Iqsec1      | protein_codi | 90656088 | 90988685 | inside       | 233678 | 98676  | shortestDistance |
| chr6 | 90787029 | 90788028 | 1000 | 1.95  | 2.53E-07 | 7.36E-06 | ENSMUSG0000003431  | Iqsec1      | protein_codi | 90656088 | 90988685 | inside       | 201157 | 130941 | shortestDistance |
| chr6 | 91092182 | 91092643 | 462  | -1.77 | 0.000216 | 0.0021   | ENSMUSG0000003009  | Nup210      | protein_codi | 91013068 | 91116829 | inside       | 24417  | 24186  | shortestDistance |
| chr6 | 91392478 | 91393172 | 695  | -1.14 | 0.00309  | 0.0172   | ENSMUSG0000003009  | Wnt7a       | protein_codi | 91363981 | 91411363 | inside       | 18538  | 18191  | shortestDistance |
| chr6 | 91706022 | 91706527 | 506  | 1.05  | 0.0101   | 0.0427   | ENSMUSG0000003009  | S1c6a6      | protein_codi | 91684053 | 91759066 | inside       | 22221  | 21969  | shortestDistance |
| chr6 | 92067039 | 92067518 | 480  | 0.99  | 0.00499  | 0.0249   | ENSMUSG0000003403  | Fg05        | protein_codi | 91978878 | 92076004 | inside       | 88400  | 8486   | shortestDistance |
| chr6 | 92100127 | 92100531 | 405  | 2     | 5.36E-06 | 9.76E-05 | ENSMUSG0000005089  | Nr2c2       | protein_codi | 92091390 | 92174294 | inside       | 8939   | 8737   | shortestDistance |
| chr6 | 92100764 | 92101441 | 678  | 2.34  | 9.18E-08 | 3.09E-06 | ENSMUSG0000005089  | Nr2c2       | protein_codi | 92091390 | 92174294 | inside       | 9712   | 9374   | shortestDistance |
| chr6 | 92126851 | 92127208 | 358  | 1.29  | 0.00226  | 0.0135   | ENSMUSG0000005089  | Nr2c2       | protein_codi | 92091390 | 92174294 | inside       | 35640  | 35461  | shortestDistance |
| chr6 | 93224074 | 93224331 | 258  | -1.33 | 0.00242  | 0.0143   | ENSMUSG0000009746  | 9530026P051 | antisense_RI | 92940329 |          |              |        |        |                  |

|      |           |           |      |       |          |          |                   |         |              |           |           |              |         |        |                  |
|------|-----------|-----------|------|-------|----------|----------|-------------------|---------|--------------|-----------|-----------|--------------|---------|--------|------------------|
| chr6 | 99027889  | 99029068  | 1180 | 0.97  | 0.00347  | 0.0188   | ENSMUSG0000003006 | Foxp1   | protein_codi | 98925338  | 99522721  | inside       | 494243  | 102551 | shortestDistance |
| chr6 | 99057146  | 99057596  | 451  | 1.11  | 0.00445  | 0.0228   | ENSMUSG0000003006 | Foxp1   | protein_codi | 98925338  | 99522721  | inside       | 465350  | 131808 | shortestDistance |
| chr6 | 99078164  | 99078470  | 307  | 2.09  | 0.000156 | 0.00162  | ENSMUSG0000003006 | Foxp1   | protein_codi | 98925338  | 99522721  | inside       | 444044  | 152826 | shortestDistance |
| chr6 | 99193785  | 99194075  | 291  | 1.31  | 0.00176  | 0.0112   | ENSMUSG0000003006 | Foxp1   | protein_codi | 98925338  | 99522721  | inside       | 328791  | 268447 | shortestDistance |
| chr6 | 99199220  | 99199666  | 447  | 2.5   | 2.37E-08 | 9.79E-07 | ENSMUSG0000003006 | Foxp1   | protein_codi | 98925338  | 99522721  | inside       | 323278  | 273882 | shortestDistance |
| chr6 | 99211682  | 99212847  | 1166 | 2.85  | 7.22E-13 | 1.40E-10 | ENSMUSG0000003006 | Foxp1   | protein_codi | 98925338  | 99522721  | inside       | 310457  | 286344 | shortestDistance |
| chr6 | 99252777  | 99253154  | 378  | 1.88  | 3.19E-06 | 6.27E-05 | ENSMUSG0000003006 | Foxp1   | protein_codi | 98925338  | 99522721  | inside       | 269755  | 269567 | shortestDistance |
| chr6 | 99263277  | 99263971  | 695  | 1.37  | 0.00012  | 0.00129  | ENSMUSG0000003006 | Foxp1   | protein_codi | 98925338  | 99522721  | inside       | 259097  | 258750 | shortestDistance |
| chr6 | 99264219  | 99264665  | 447  | 1.16  | 0.000785 | 0.00589  | ENSMUSG0000003006 | Foxp1   | protein_codi | 98925338  | 99522721  | inside       | 258279  | 258056 | shortestDistance |
| chr6 | 99302969  | 99303367  | 399  | 1.28  | 0.00505  | 0.0251   | ENSMUSG0000003006 | Foxp1   | protein_codi | 98925338  | 99522721  | inside       | 219553  | 219354 | shortestDistance |
| chr6 | 99335207  | 99335787  | 581  | 1.95  | 4.09E-07 | 1.11E-05 | ENSMUSG0000003006 | Foxp1   | protein_codi | 98925338  | 99522721  | inside       | 187224  | 186934 | shortestDistance |
| chr6 | 99412603  | 99413013  | 411  | 3.47  | 4.26E-09 | 2.22E-07 | ENSMUSG0000003006 | Foxp1   | protein_codi | 98925338  | 99522721  | inside       | 109913  | 109708 | shortestDistance |
| chr6 | 99435131  | 99435558  | 428  | 1.66  | 4.88E-05 | 0.000619 | ENSMUSG0000003006 | Foxp1   | protein_codi | 98925338  | 99522721  | inside       | 87377   | 87163  | shortestDistance |
| chr6 | 99436242  | 99436788  | 547  | 1.5   | 5.66E-05 | 7.00E-04 | ENSMUSG0000003006 | Foxp1   | protein_codi | 98925338  | 99522721  | inside       | 86206   | 85933  | shortestDistance |
| chr6 | 99610715  | 99611448  | 734  | 0.99  | 0.00615  | 0.0292   | ENSMUSG0000003006 | Gm20696 | protein_codi | 99257484  | 99666797  | inside       | 55715   | 55349  | shortestDistance |
| chr6 | 99636765  | 99637189  | 425  | 3.65  | 3.01E-12 | 4.70E-10 | ENSMUSG0000003006 | Eif4e3  | protein_codi | 99625135  | 99666771  | inside       | 29794   | 11630  | shortestDistance |
| chr6 | 99649282  | 99649793  | 512  | 2.22  | 3.46E-07 | 9.61E-06 | ENSMUSG0000003006 | Eif4e3  | protein_codi | 99625135  | 99666771  | inside       | 17233   | 16978  | shortestDistance |
| chr6 | 99726803  | 99727212  | 410  | 1.36  | 0.00131  | 0.00882  | ENSMUSG0000003006 | Gm26748 | antisense_RI | 99725771  | 99732553  | inside       | 1237    | 1032   | shortestDistance |
| chr6 | 99746355  | 99746605  | 251  | 2.09  | 9.90E-05 | 0.0011   | ENSMUSG0000003006 | Gm26748 | antisense_RI | 99725771  | 99732553  | downstream   | 20709   | 13802  | shortestDistance |
| chr6 | 99898080  | 99898455  | 376  | -1.26 | 0.000692 | 0.00534  | ENSMUSG0000003006 | Gm43067 | lincRNA      | 99884400  | 99898465  | upstream     | -1423   | 1235   | shortestDistance |
| chr6 | 99931530  | 99932038  | 509  | 1.17  | 0.00128  | 0.00869  | ENSMUSG0000003006 | Gm44442 | lincRNA      | 99928248  | 99950931  | inside       | 19147   | 3282   | shortestDistance |
| chr6 | 99934108  | 99934797  | 690  | -1.15 | 0.00165  | 0.0106   | ENSMUSG0000003006 | Gm44442 | lincRNA      | 99928248  | 99950931  | inside       | 16479   | 5860   | shortestDistance |
| chr6 | 99942848  | 99943376  | 529  | 1.63  | 6.82E-05 | 0.000816 | ENSMUSG0000003006 | Gm44442 | lincRNA      | 99928248  | 99950931  | inside       | 7819    | 7555   | shortestDistance |
| chr6 | 99991064  | 99991474  | 411  | -1.43 | 0.000265 | 0.00248  | ENSMUSG0000003006 | Gm33201 | lincRNA      | 99967516  | 99991215  | overlapStart | -54     | 151    | shortestDistance |
| chr6 | 100013957 | 100014680 | 724  | -1.13 | 0.00124  | 0.00848  | ENSMUSG0000003006 | Gm33201 | lincRNA      | 99967516  | 99991215  | upstream     | -23103  | 22742  | shortestDistance |
| chr6 | 100127726 | 100128194 | 469  | -1.12 | 0.003    | 0.0168   | ENSMUSG0000003006 | Gm33201 | TEC          | 100143423 | 100143814 | downstream   | 15854   | 15229  | shortestDistance |
| chr6 | 100194558 | 100193268 | 811  | -0.88 | 0.0116   | 0.0474   | ENSMUSG0000003006 | Rybpb   | protein_codi | 100228565 | 100287485 | downstream   | 94622   | 35297  | shortestDistance |
| chr6 | 100206704 | 100207231 | 528  | -0.88 | 0.00798  | 0.0357   | ENSMUSG0000003006 | Rybpb   | protein_codi | 100228565 | 100287485 | downstream   | 80517   | 21334  | shortestDistance |
| chr6 | 100297507 | 100298069 | 563  | 2.01  | 9.11E-06 | 0.000153 | ENSMUSG0000003006 | Rybpb   | protein_codi | 100228565 | 100287485 | upstream     | -10303  | 10022  | shortestDistance |
| chr6 | 100311098 | 100311673 | 576  | 5.28  | 1.74E-16 | 1.60E-13 | ENSMUSG0000003006 | Rybpb   | protein_codi | 100228565 | 100287485 | upstream     | -23901  | 23613  | shortestDistance |
| chr6 | 100335306 | 100335777 | 472  | 1.47  | 0.000285 | 0.00263  | ENSMUSG0000003006 | Rybpb   | protein_codi | 100228565 | 100287485 | upstream     | -48057  | 47821  | shortestDistance |
| chr6 | 100335869 | 100336287 | 419  | 1.2   | 0.001    | 0.00714  | ENSMUSG0000003006 | Rybpb   | protein_codi | 100228565 | 100287485 | upstream     | -48593  | 48384  | shortestDistance |
| chr6 | 100390528 | 100390568 | 271  | 1.3   | 0.0062   | 0.0294   | ENSMUSG0000003006 | Rybpb   | protein_codi | 100228565 | 100287485 | upstream     | -102948 | 102813 | shortestDistance |
| chr6 | 100409868 | 100410501 | 634  | 2.18  | 2.73E-07 | 7.84E-06 | ENSMUSG0000003006 | Gm23234 | snRNA        | 100494681 | 100494814 | downstream   | 84630   | 84180  | shortestDistance |
| chr6 | 100415835 | 100416797 | 963  | 1.24  | 0.000723 | 0.00552  | ENSMUSG0000003006 | Gm23234 | snRNA        | 100494681 | 100494814 | downstream   | 78488   | 77884  | shortestDistance |
| chr6 | 100502031 | 100502858 | 828  | 1     | 0.00748  | 0.034    | ENSMUSG0000003006 | Gm44107 | lincRNA      | 100498515 | 100499914 | downstream   | 3929    | 2117   | shortestDistance |
| chr6 | 100510732 | 100511074 | 343  | 1.26  | 0.00109  | 0.00765  | ENSMUSG0000003006 | Gm44107 | lincRNA      | 100498515 | 100499914 | downstream   | 12388   | 10818  | shortestDistance |
| chr6 | 100571620 | 100576620 | 494  | -1.08 | 0.00336  | 0.0183   | ENSMUSG0000003006 | Shp1    | protein_codi | 100568256 | 100671157 | inside       | 94783   | 7871   | shortestDistance |
| chr6 | 100613900 | 100614245 | 346  | 3.29  | 3.80E-10 | 2.82E-08 | ENSMUSG0000003006 | Shp1    | protein_codi | 100568256 | 100671157 | inside       | 57085   | 45644  | shortestDistance |
| chr6 | 100800403 | 100801111 | 709  | 1.79  | 6.40E-06 | 0.000113 | ENSMUSG0000003006 | Gxylt2  | protein_codi | 100704734 | 100810913 | inside       | 96023   | 9802   | shortestDistance |
| chr6 | 100821472 | 100882772 | 356  | 1.04  | 0.00824  | 0.0367   | ENSMUSG0000003006 | Ppp4r2  | protein_codi | 100833622 | 100869934 | downstream   | 48972   | 12483  | shortestDistance |
| chr6 | 100883274 | 100883770 | 497  | 0.96  | 0.0111   | 0.0459   | ENSMUSG0000003006 | Ppp4r2  | protein_codi | 100833622 | 100869934 | downstream   | 49900   | 13340  | shortestDistance |
| chr6 | 101330298 | 101330997 | 700  | 1.44  | 0.000839 | 0.00622  | ENSMUSG0000003006 | Pdm3    | protein_codi | 101149609 | 101377897 | inside       | 47249   | 46900  | shortestDistance |
| chr6 | 101532301 | 101532969 | 669  | -1.26 | 0.000601 | 0.00478  | ENSMUSG0000003006 | Gm44169 | lincRNA      | 101519655 | 101537292 | inside       | 12980   | 4323   | shortestDistance |
| chr6 | 101616884 | 101617149 | 266  | -1.84 | 4.97E-05 | 0.000628 | ENSMUSG0000003006 | Gm32453 | processed_p  | 101652234 | 101652689 | upstream     | -35218  | 35085  | shortestDistance |
| chr6 | 101650418 | 101650851 | 434  | -1.22 | 0.00196  | 0.0121   | ENSMUSG0000003006 | Gm32453 | processed_p  | 101652234 | 101652689 | upstream     | -1600   | 1383   | shortestDistance |
| chr6 | 101921159 | 101921924 | 766  | -1.57 | 1.16E-05 | 0.000187 | ENSMUSG0000003006 | Gm44177 | TEC          | 101913273 | 101915939 | downstream   | 8269    | 5220   | shortestDistance |
| chr6 | 102230829 | 102231374 | 546  | -1.35 | 7.03E-05 | 0.000836 | ENSMUSG0000003006 | Ctnb3   | protein_codi | 102162655 | 102573101 | inside       | 341999  | 68174  | shortestDistance |
| chr6 | 102564038 | 102564788 | 751  | -1.1  | 0.00567  | 0.0275   | ENSMUSG0000003006 | Ctnb3   | protein_codi | 102162655 | 102573101 | inside       | 8688    | 8313   | shortestDistance |
| chr6 | 102844447 | 102844857 | 411  | -1.18 | 0.0016   | 0.0103   | ENSMUSG0000003006 | Gm26022 | snRNA        | 102862368 | 102862475 | upstream     | -17716  | 17511  | shortestDistance |
| chr6 | 102846460 | 102846754 | 295  | -2.8  | 2.95E-08 | 1.19E-06 | ENSMUSG0000003006 | Gm26022 | snRNA        | 102862368 | 102862475 | upstream     | -15761  | 15614  | shortestDistance |
| chr6 | 102862155 | 102862408 | 254  | -1.29 | 0.0014   | 0.0093   | ENSMUSG0000003006 | Gm26022 | snRNA        | 102862368 | 102862475 | overlapStart | -86     | 40     | shortestDistance |
| chr6 | 102976978 | 102977542 | 565  | 3.33  | 2.28E-16 | 1.94E-13 | ENSMUSG0000003006 | Gm44429 | processed_p  | 102937353 | 102937538 | upstream     | -39722  | 39440  | shortestDistance |
| chr6 | 103033391 | 103034494 | 1104 | -1.12 | 0.000634 | 0.00498  | ENSMUSG0000003006 | Gm44429 | processed_p  | 102937353 | 102937538 | upstream     | -96404  | 95853  | shortestDistance |
| chr6 | 103106247 | 103106517 | 271  | -1.36 | 0.00335  | 0.0183   | ENSMUSG0000003006 | Gm44449 | processed_p  | 103167801 | 103167953 | upstream     | -61419  | 61284  | shortestDistance |
| chr6 | 103183386 | 103183939 | 554  | -1.33 | 0.000233 | 0.00223  | ENSMUSG0000003006 | Gm44449 | processed_p  | 103167801 | 103167953 | downstream   | 15861   | 15433  | shortestDistance |
| chr6 | 103306745 | 103307093 | 349  | -1    | 0.00333  | 0.0182   | ENSMUSG0000003006 | Gm44295 | processed_p  | 103279950 | 103279986 | upstream     | -26933  | 26759  | shortestDistance |
| chr6 | 103345090 | 103345555 | 466  | 1.6   | 7.50E-05 | 0.000879 | ENSMUSG0000003006 | Gm44295 | processed_p  | 103279950 | 103279986 | upstream     | -65336  | 65104  | shortestDistance |
| chr6 | 103352414 | 103352727 | 314  | 1.46  | 0.00134  | 0.00901  | ENSMUSG0000003006 | Gm44295 | processed_p  | 103279950 | 103279986 | upstream     | -72584  | 72428  | shortestDistance |
| chr6 | 103417772 | 103418224 | 453  | -2.4  | 4.35E-08 | 1.64E-06 | ENSMUSG0000003006 | Chl1    | protein_codi | 103510586 | 103750211 | upstream     | -92588  | 92362  | shortestDistance |
| chr6 | 103465406 | 103466029 | 624  | -1.24 | 7.23E-05 | 0.000855 | ENSMUSG0000003006 | Chl1    | protein_codi | 103510586 | 103750211 | upstream     | -44868  | 44557  | shortestDistance |
| chr6 | 103567611 | 103568099 | 489  | -1.33 | 0.0012   | 0.00825  | ENSMUSG0000003006 | Chl1    | protein_codi | 103510586 | 103750211 | inside       | 57269   | 57025  | shortestDistance |
| chr6 | 103833529 | 103834166 | 638  | -0.86 | 0.00738  | 0.0337   | ENSMUSG0000003006 | Gm25656 | snRNA        | 103832513 | 103832578 | upstream     | -1270   | 951    | shortestDistance |
| chr6 | 106440714 | 106441227 | 514  | -1.17 | 0.00109  | 0.0076   | ENSMUSG0000003006 | Ctnn4   | protein_codi | 105677660 | 106699310 | inside       | 763310  | 258083 | shortestDistance |
| chr6 | 106819936 | 106820245 | 310  | 1.34  | 0.00398  | 0.0209   | ENSMUSG0000003006 | Crbn    | protein_codi | 106780201 | 106800077 | upstream     | -20013  | 19859  | shortestDistance |
| chr6 | 106981075 | 106981723 | 649  | 1.27  | 0.00334  | 0.0183   | ENSMUSG0000003006 | Gm22418 | snRNA        | 107001452 | 107001558 | upstream     | -20053  | 19729  | shortestDistance |
| chr6 | 107494456 | 107494998 | 543  | -2.24 | 6.92E-05 | 0.000826 | ENSMUSG0000003006 | Gm44277 | processed_p  | 107503808 | 107504456 | upstream     | -9081   | 8810   | shortestDistance |
| chr6 | 107529576 | 107530491 | 916  | -1.17 | 0.000467 | 0.00391  | ENSMUSG0000003006 | Lrrm1   | protein_codi | 107529768 | 107570214 | overlapStart | 266     | 192    | shortestDistance |
| chr6 | 107530727 | 107531248 | 522  | -1.73 | 3.68E-06 | 7.08E-05 | ENSMUSG0000003006 | Lrrm1   | protein_codi | 107529768 | 107570214 | inside       | 1220    | 959    | shortestDistance |
| chr6 | 108164883 | 108165330 | 448  | -1.54 | 0.00     |          |                   |         |              |           |           |              |         |        |                  |

|      |           |           |      |       |          |          |                   |             |              |           |           |              |        |        |                  |
|------|-----------|-----------|------|-------|----------|----------|-------------------|-------------|--------------|-----------|-----------|--------------|--------|--------|------------------|
| chr6 | 113690399 | 113691392 | 994  | 1.49  | 7.56E-05 | 0.000885 | ENSMUSG0000006047 | Irak2       | protein_codi | 113638467 | 113695026 | inside       | 52429  | 3634   | shortestDistance |
| chr6 | 113714177 | 113714771 | 595  | 1.12  | 0.00182  | 0.0114   | ENSMUSG0000009799 | Gm26982     | antisense_RI | 113714971 | 113716121 | upstream     | -497   | 200    | shortestDistance |
| chr6 | 113934574 | 113935206 | 633  | -0.96 | 0.00611  | 0.0291   | ENSMUSG000000303C | Atp2b2      | protein_codi | 113743831 | 114042613 | inside       | 107723 | 107407 | shortestDistance |
| chr6 | 114659360 | 114660714 | 1355 | 1.56  | 2.18E-05 | 0.000317 | ENSMUSG0000003031 | Atg7        | protein_codi | 114643097 | 114860614 | inside       | 16940  | 16263  | shortestDistance |
| chr6 | 114782020 | 114782323 | 304  | 1.7   | 0.00011  | 0.0012   | ENSMUSG0000003031 | Atg7        | protein_codi | 114643097 | 114860614 | inside       | 139075 | 78291  | shortestDistance |
| chr6 | 114797739 | 114798326 | 588  | 1.81  | 2.35E-05 | 0.000338 | ENSMUSG0000003031 | Atg7        | protein_codi | 114643097 | 114860614 | inside       | 154935 | 62288  | shortestDistance |
| chr6 | 114848819 | 114849333 | 515  | 1     | 0.00861  | 0.0379   | ENSMUSG0000003031 | Atg7        | protein_codi | 114643097 | 114860614 | inside       | 205979 | 11281  | shortestDistance |
| chr6 | 114893572 | 114894240 | 669  | 1.03  | 0.00188  | 0.0117   | ENSMUSG0000003031 | Vgll4       | protein_codi | 114860628 | 114969994 | inside       | 76088  | 32944  | shortestDistance |
| chr6 | 115006995 | 115007314 | 320  | 1.71  | 0.000142 | 0.00149  | ENSMUSG0000003031 | Tamm41      | protein_codi | 115004381 | 115037876 | inside       | 30722  | 2614   | shortestDistance |
| chr6 | 115321236 | 115321779 | 544  | 2.22  | 4.72E-07 | 1.25E-05 | ENSMUSG0000000044 | Pparg       | protein_codi | 115360951 | 115490399 | upstream     | -39443 | 39172  | shortestDistance |
| chr6 | 115420776 | 115421366 | 591  | 3.78  | 3.58E-12 | 5.46E-10 | ENSMUSG0000000044 | Pparg       | protein_codi | 115360951 | 115490399 | inside       | 60120  | 59825  | shortestDistance |
| chr6 | 115421668 | 115422013 | 346  | 3.25  | 1.07E-09 | 6.85E-08 | ENSMUSG0000000044 | Pparg       | protein_codi | 115360951 | 115490399 | inside       | 60889  | 60717  | shortestDistance |
| chr6 | 115519049 | 115519880 | 832  | 1.45  | 0.00288  | 0.0163   | ENSMUSG0000010770 | Gm36355     | lincRNA      | 115529131 | 115536900 | downstream   | 17436  | 9251   | shortestDistance |
| chr6 | 115666609 | 115667281 | 673  | 2.24  | 4.22E-08 | 1.60E-06 | ENSMUSG0000000044 | Raf1        | protein_codi | 115618067 | 115676635 | inside       | 9690   | 9354   | shortestDistance |
| chr6 | 115814027 | 115814808 | 782  | 1.28  | 0.000158 | 0.00163  | ENSMUSG0000003032 | Efcab12     | protein_codi | 115810729 | 115838412 | inside       | 23994  | 3298   | shortestDistance |
| chr6 | 115888356 | 115888589 | 234  | 1.97  | 0.000321 | 0.0029   | ENSMUSG0000003032 | Ifi122      | protein_codi | 115853470 | 115926699 | inside       | 35002  | 34886  | shortestDistance |
| chr6 | 115896946 | 115897800 | 855  | 1.89  | 8.67E-07 | 2.08E-05 | ENSMUSG0000003032 | Ifi122      | protein_codi | 115853470 | 115926699 | inside       | 43903  | 28899  | shortestDistance |
| chr6 | 115901067 | 115901431 | 365  | 0.94  | 0.0099   | 0.0421   | ENSMUSG0000003032 | Ifi122      | protein_codi | 115853470 | 115926699 | inside       | 47779  | 2568   | shortestDistance |
| chr6 | 115909105 | 115909508 | 404  | 1.35  | 0.000346 | 0.00308  | ENSMUSG0000003032 | Ifi122      | protein_codi | 115853470 | 115926699 | inside       | 55836  | 17191  | shortestDistance |
| chr6 | 115968862 | 115969271 | 410  | 2.22  | 1.99E-07 | 6.00E-06 | ENSMUSG0000003012 | Pknox1      | protein_codi | 115954811 | 115995005 | inside       | 25939  | 14051  | shortestDistance |
| chr6 | 115973187 | 115973643 | 457  | 1.5   | 2.57E-05 | 0.000364 | ENSMUSG0000003012 | Pknox1      | protein_codi | 115954811 | 115995005 | inside       | 21590  | 18376  | shortestDistance |
| chr6 | 115994555 | 115995464 | 910  | 0.83  | 0.00555  | 0.027    | ENSMUSG0000003012 | Pknox1      | protein_codi | 115954811 | 115995005 | overlapStart | -5     | 450    | shortestDistance |
| chr6 | 116003498 | 116003931 | 434  | 1.46  | 0.000396 | 0.00343  | ENSMUSG0000003012 | Pknox1      | protein_codi | 115954811 | 115995005 | upstream     | -8709  | 8493   | shortestDistance |
| chr6 | 116004718 | 116005118 | 399  | 1.74  | 0.000671 | 0.00521  | ENSMUSG0000003012 | Pknox1      | protein_codi | 115954811 | 115995005 | upstream     | -9912  | 9713   | shortestDistance |
| chr6 | 116010600 | 116010890 | 291  | 1.15  | 0.00694  | 0.0321   | ENSMUSG0000003012 | Tmc1        | protein_codi | 116018611 | 116193486 | downstream   | 182741 | 7721   | shortestDistance |
| chr6 | 116013710 | 116014498 | 789  | 2.71  | 1.67E-11 | 2.05E-09 | ENSMUSG0000003012 | Tmc1        | protein_codi | 116018611 | 116193486 | downstream   | 179382 | 4113   | shortestDistance |
| chr6 | 116186543 | 116186852 | 310  | 1.49  | 0.00177  | 0.0112   | ENSMUSG0000003012 | Tmc1        | protein_codi | 116018611 | 116193486 | inside       | 6788   | 6634   | shortestDistance |
| chr6 | 116227738 | 116228120 | 383  | 2.31  | 6.88E-08 | 2.42E-06 | ENSMUSG0000002410 | Washc2      | protein_codi | 116208038 | 116262686 | inside       | 19891  | 19700  | shortestDistance |
| chr6 | 116417492 | 116418223 | 732  | 2.01  | 1.91E-07 | 5.79E-06 | ENSMUSG0000002570 | Alox5       | protein_codi | 116410077 | 116461178 | inside       | 43320  | 7415   | shortestDistance |
| chr6 | 116455519 | 116456318 | 800  | 1.05  | 0.0121   | 0.049    | ENSMUSG0000002570 | Alox5       | protein_codi | 116410077 | 116461178 | inside       | 5260   | 4860   | shortestDistance |
| chr6 | 116458753 | 116459515 | 763  | 1.24  | 0.000356 | 0.00315  | ENSMUSG0000002570 | Alox5       | protein_codi | 116410077 | 116461178 | inside       | 2044   | 1663   | shortestDistance |
| chr6 | 116621008 | 116621882 | 875  | 1.05  | 0.00321  | 0.0177   | ENSMUSG0000010813 | Gm18485     | processed_p  | 116621411 | 116622524 | overlapEnd   | 1079   | 403    | shortestDistance |
| chr6 | 116630766 | 116631345 | 580  | 1.39  | 4.78E-05 | 0.000608 | ENSMUSG0000010742 | Gm44154     | TEC          | 116630222 | 116632945 | inside       | 834    | 544    | shortestDistance |
| chr6 | 116679285 | 116679962 | 678  | 1.36  | 0.000739 | 0.00561  | ENSMUSG0000004810 | Tmem72      | protein_codi | 116679063 | 116716913 | inside       | 37289  | 222    | shortestDistance |
| chr6 | 116682186 | 116682779 | 594  | 0.87  | 0.00507  | 0.0252   | ENSMUSG0000004810 | Tmem72      | protein_codi | 116679063 | 116716913 | inside       | 34431  | 3123   | shortestDistance |
| chr6 | 116700125 | 116700453 | 329  | 1.37  | 0.00511  | 0.0253   | ENSMUSG0000004810 | Tmem72      | protein_codi | 116679063 | 116716913 | inside       | 16624  | 16460  | shortestDistance |
| chr6 | 116700682 | 116701236 | 555  | 0.88  | 0.0118   | 0.0481   | ENSMUSG0000004810 | Tmem72      | protein_codi | 116679063 | 116716913 | inside       | 15954  | 15677  | shortestDistance |
| chr6 | 116726195 | 116726411 | 217  | 2.6   | 9.45E-07 | 2.24E-05 | ENSMUSG0000004810 | Tmem72      | protein_codi | 116679063 | 116716913 | upstream     | -9390  | 9282   | shortestDistance |
| chr6 | 116756382 | 116756781 | 400  | 2.81  | 2.45E-09 | 1.39E-07 | ENSMUSG0000008837 | Gm22882     | snRNA        | 116765529 | 116765652 | downstream   | 9070   | 8748   | shortestDistance |
| chr6 | 116757926 | 116758374 | 449  | 1.73  | 2.71E-05 | 0.00038  | ENSMUSG0000008837 | Gm22882     | snRNA        | 116765529 | 116765652 | downstream   | 7502   | 7155   | shortestDistance |
| chr6 | 117241235 | 117241804 | 570  | 1.2   | 0.00213  | 0.0129   | ENSMUSG0000009054 | Rpl28-ps4   | processed_p  | 117213690 | 117214066 | upstream     | -27454 | 27169  | shortestDistance |
| chr6 | 117393507 | 117393901 | 395  | 2.95  | 4.08E-11 | 4.32E-09 | ENSMUSG0000010743 | Gm4640      | lincRNA      | 117420577 | 117423617 | downstream   | 29913  | 26676  | shortestDistance |
| chr6 | 117497224 | 117497743 | 520  | -1.32 | 0.000415 | 0.00357  | ENSMUSG0000010802 | 6820426E19f | lincRNA      | 117495235 | 117500077 | inside       | 2249   | 1989   | shortestDistance |
| chr6 | 117675123 | 117675784 | 662  | 1.1   | 0.00328  | 0.018    | ENSMUSG0000009986 | 1700030F04f | lincRNA      | 117646693 | 117751769 | inside       | 76315  | 28430  | shortestDistance |
| chr6 | 117788190 | 117788256 | 597  | 2.31  | 1.91E-09 | 1.12E-07 | ENSMUSG0000004209 | Zfp239      | protein_codi | 117862100 | 117873291 | downstream   | 20168  | 8679   | shortestDistance |
| chr6 | 117906541 | 117907993 | 1453 | 0.79  | 0.0106   | 0.0444   | ENSMUSG0000004208 | 4933440N22  | TEC          | 117905808 | 117907760 | overlapStart | 493    | 233    | shortestDistance |
| chr6 | 117935903 | 117936263 | 361  | 2.58  | 5.74E-10 | 4.01E-08 | ENSMUSG0000000440 | Fxyd4       | protein_codi | 117933559 | 117937692 | inside       | 1609   | 1429   | shortestDistance |
| chr6 | 118127080 | 118127556 | 477  | 1.66  | 1.28E-05 | 0.000203 | ENSMUSG0000004204 | Csgalnact2  | protein_codi | 118107452 | 118139140 | inside       | 11822  | 11584  | shortestDistance |
| chr6 | 118127941 | 118128476 | 536  | 1.29  | 0.000191 | 0.00191  | ENSMUSG0000004204 | Csgalnact2  | protein_codi | 118107452 | 118139140 | inside       | 10932  | 10664  | shortestDistance |
| chr6 | 118137184 | 118137493 | 310  | 1.44  | 1.47E-05 | 0.000228 | ENSMUSG0000004204 | Csgalnact2  | protein_codi | 118107452 | 118139140 | inside       | 1802   | 1647   | shortestDistance |
| chr6 | 118138684 | 118139604 | 921  | 0.86  | 0.00391  | 0.0206   | ENSMUSG0000004204 | Csgalnact2  | protein_codi | 118107452 | 118139140 | overlapStart | -4     | 456    | shortestDistance |
| chr6 | 118140932 | 118141354 | 423  | 2.08  | 3.06E-06 | 6.06E-05 | ENSMUSG0000004204 | Csgalnact2  | protein_codi | 118107452 | 118139140 | upstream     | -2003  | 1792   | shortestDistance |
| chr6 | 118314935 | 118315399 | 465  | -1.25 | 0.000646 | 0.00505  | ENSMUSG0000010793 | Gm30498     | lincRNA      | 118300168 | 118308384 | upstream     | -6783  | 6551   | shortestDistance |
| chr6 | 118327503 | 118327790 | 288  | 1.42  | 0.0016   | 0.0104   | ENSMUSG0000010793 | Gm30498     | lincRNA      | 118300168 | 118308384 | upstream     | -19262 | 19119  | shortestDistance |
| chr6 | 118808157 | 118808415 | 259  | -1.53 | 0.000362 | 0.0032   | ENSMUSG0000003013 | Cacna1c     | protein_codi | 118587240 | 119196418 | inside       | 388132 | 220917 | shortestDistance |
| chr6 | 119174925 | 119175912 | 988  | 0.79  | 0.00753  | 0.0342   | ENSMUSG0000000417 | Dcp1b       | protein_codi | 119175253 | 119221616 | overlapStart | 165    | 328    | shortestDistance |
| chr6 | 119388341 | 119389032 | 692  | 0.9   | 0.00365  | 0.0195   | ENSMUSG0000003016 | Adipor2     | protein_codi | 119353150 | 119417704 | inside       | 29018  | 28672  | shortestDistance |
| chr6 | 119395397 | 119396132 | 736  | 0.93  | 0.00511  | 0.0253   | ENSMUSG0000003016 | Adipor2     | protein_codi | 119353150 | 119417704 | inside       | 21940  | 21572  | shortestDistance |
| chr6 | 119396159 | 119396645 | 487  | 0.86  | 0.0119   | 0.0483   | ENSMUSG0000003016 | Adipor2     | protein_codi | 119353150 | 119417704 | inside       | 21302  | 21059  | shortestDistance |
| chr6 | 119416759 | 119417044 | 286  | 1.21  | 0.00268  | 0.0154   | ENSMUSG0000003016 | Adipor2     | protein_codi | 119353150 | 119417704 | inside       | 802    | 660    | shortestDistance |
| chr6 | 119417331 | 119417741 | 411  | 0.92  | 0.00767  | 0.0347   | ENSMUSG0000003016 | Adipor2     | protein_codi | 119353150 | 119417704 | overlapStart | 168    | 37     | shortestDistance |
| chr6 | 119443850 | 119444496 | 647  | 1.01  | 0.00398  | 0.0209   | ENSMUSG0000003017 | Wnt5b       | protein_codi | 119432531 | 119544347 | inside       | 100174 | 11319  | shortestDistance |
| chr6 | 119478891 | 119480634 | 1744 | 0.99  | 0.00237  | 0.014    | ENSMUSG0000003001 | Fbxl14      | protein_codi | 119479668 | 119482630 | overlapStart | 94     | 777    | shortestDistance |
| chr6 | 119489793 | 119490067 | 275  | 1.45  | 0.00144  | 0.00952  | ENSMUSG0000003017 | Wnt5b       | protein_codi | 119432531 | 119544347 | inside       | 54417  | 54280  | shortestDistance |
| chr6 | 119715257 | 119715609 | 353  | 2.17  | 1.32E-05 | 0.000209 | ENSMUSG0000003017 | Erc1        | protein_codi | 119570796 | 119848167 | inside       | 132734 | 132558 | shortestDistance |
| chr6 | 119847753 | 119848822 | 1070 | 0.92  | 0.00337  | 0.0183   | ENSMUSG0000003017 | Erc1        | protein_codi | 119570796 | 119848167 | overlapStart | -121   | 414    | shortestDistance |
| chr6 | 119902284 | 119903282 | 999  | 0.88  | 0.00553  | 0.0269   | ENSMUSG0000003016 | Rad52       | protein_codi | 119902698 | 119922828 | overlapStart | 85     | 414    | shortestDistance |
| chr6 | 120042859 | 120043127 | 269  | 1.37  | 0.000137 | 0.00145  | ENSMUSG0000004596 | Wnk1        | protein_codi | 119923969 | 120038672 | upstream     | -4321  | 4187   | shortestDistance |
| chr6 | 120102072 | 120102423 | 352  | 1.5   | 0.00159  | 0.0103   | ENSMUSG0000004137 | Ninj2       | protein_codi | 120093350 | 120200339 | inside       | 8898   | 8722   | shortestDistance |
| chr6 | 120149572 | 120150158 | 587  | 1.02  | 0.00319  | 0.0      |                   |             |              |           |           |              |        |        |                  |

|      |           |           |      |       |          |          |                     |             |               |           |           |              |        |       |                  |
|------|-----------|-----------|------|-------|----------|----------|---------------------|-------------|---------------|-----------|-----------|--------------|--------|-------|------------------|
| chr6 | 123252728 | 123253246 | 519  | 1.09  | 0.00058  | 0.00464  | ENSMUSG0000002334   | Clec4n      | protein_codi  | 123229843 | 123247021 | downstream   | 23144  | 5707  | shortestDistance |
| chr6 | 123930873 | 123931724 | 852  | -0.84 | 0.0105   | 0.0439   | ENSMUSG0000010819   | Gm44823     | unprocessed   | 123932293 | 123939493 | downstream   | 8195   | 569   | shortestDistance |
| chr6 | 124149734 | 124150185 | 452  | -1.05 | 0.00888  | 0.0388   | ENSMUSG0000010771   | Vmn2r-ps34  | unprocessed   | 124145713 | 124173146 | inside       | 23186  | 4021  | shortestDistance |
| chr6 | 124424060 | 124424473 | 414  | 1.59  | 0.000564 | 0.00454  | ENSMUSG0000000815   | C1stn3      | protein_codi  | 124430759 | 124464794 | downstream   | 40528  | 6286  | shortestDistance |
| chr6 | 124477799 | 124478735 | 937  | 1.39  | 0.00016  | 0.00165  | ENSMUSG0000000815   | C1stn3      | protein_codi  | 124430759 | 124464794 | upstream     | -13473 | 13005 | shortestDistance |
| chr6 | 124637021 | 124637532 | 512  | 1.27  | 0.000168 | 0.00171  | ENSMUSG0000007934   | C1s2        | protein_codi  | 124624625 | 124636085 | upstream     | -1191  | 936   | shortestDistance |
| chr6 | 124688137 | 124688724 | 588  | 1.11  | 0.00221  | 0.0133   | ENSMUSG0000000427   | Lpcat3      | protein_codi  | 124663027 | 124704418 | inside       | 25403  | 15694 | shortestDistance |
| chr6 | 124693564 | 124693879 | 316  | -1.02 | 0.00438  | 0.0225   | ENSMUSG0000000427   | Lpcat3      | protein_codi  | 124663027 | 124704418 | inside       | 30695  | 10539 | shortestDistance |
| chr6 | 124694014 | 124694729 | 716  | -1.19 | 0.000234 | 0.00224  | ENSMUSG0000000427   | Lpcat3      | protein_codi  | 124663027 | 124704418 | inside       | 31345  | 9689  | shortestDistance |
| chr6 | 124711793 | 124712623 | 831  | 0.95  | 0.00195  | 0.0121   | ENSMUSG0000000426   | Emg1        | protein_codi  | 124704085 | 124712178 | overlapStart | -30    | 385   | shortestDistance |
| chr6 | 124723512 | 124724005 | 494  | 1.87  | 4.10E-07 | 1.11E-05 | ENSMUSG0000000426   | Ptpn6       | protein_codi  | 124720707 | 124738714 | inside       | 14956  | 2805  | shortestDistance |
| chr6 | 124817821 | 124818334 | 514  | 1.62  | 0.00015  | 0.00156  | ENSMUSG0000000384   | Usp5        | protein_codi  | 124815019 | 124829484 | inside       | 11406  | 2802  | shortestDistance |
| chr6 | 124898355 | 124898722 | 368  | 1.6   | 0.000492 | 0.00408  | ENSMUSG00000003012  | Lag3        | protein_codi  | 124904361 | 124911705 | downstream   | 13167  | 5639  | shortestDistance |
| chr6 | 124901017 | 124901465 | 449  | 1.45  | 0.00592  | 0.0284   | ENSMUSG00000003012  | Lag3        | protein_codi  | 124904361 | 124911705 | downstream   | 10464  | 2896  | shortestDistance |
| chr6 | 125030583 | 125030901 | 319  | 1.43  | 0.000429 | 0.00365  | ENSMUSG0000010803   | 4930557K071 | antisense_RI  | 125010173 | 125049851 | inside       | 19109  | 18950 | shortestDistance |
| chr6 | 125046711 | 125047049 | 339  | 1.02  | 0.0106   | 0.0443   | ENSMUSG0000010803   | 4930557K071 | antisense_RI  | 125010173 | 125049851 | inside       | 2971   | 2802  | shortestDistance |
| chr6 | 125095960 | 125096330 | 641  | 1.34  | 9.70E-05 | 0.00109  | ENSMUSG00000006387  | Chd4        | protein_codi  | 125095981 | 125130591 | overlapStart | 29     | 291   | shortestDistance |
| chr6 | 125271384 | 125271992 | 609  | 0.97  | 0.0062   | 0.0294   | ENSMUSG0000010812   | 4930417013  | processed_tr  | 125265476 | 125287286 | inside       | 6212   | 5908  | shortestDistance |
| chr6 | 125333497 | 125333895 | 399  | 2.75  | 2.06E-06 | 4.31E-05 | ENSMUSG00000003034  | Scnn1a      | protein_codi  | 125320659 | 125344943 | inside       | 13037  | 11048 | shortestDistance |
| chr6 | 125334408 | 125334783 | 376  | 3.14  | 2.13E-11 | 2.51E-09 | ENSMUSG00000003034  | Scnn1a      | protein_codi  | 125320659 | 125344943 | inside       | 13937  | 10160 | shortestDistance |
| chr6 | 125340368 | 125340832 | 465  | 1.13  | 0.00298  | 0.0167   | ENSMUSG00000003034  | Scnn1a      | protein_codi  | 125320659 | 125344943 | inside       | 19941  | 4111  | shortestDistance |
| chr6 | 125425234 | 125425714 | 481  | 0.97  | 0.00459  | 0.0233   | ENSMUSG00000003034  | Cd9         | protein_codi  | 125460266 | 125494791 | downstream   | 69317  | 34552 | shortestDistance |
| chr6 | 125430376 | 125430813 | 438  | 2.15  | 4.81E-08 | 1.79E-06 | ENSMUSG00000003034  | Cd9         | protein_codi  | 125460266 | 125494791 | downstream   | 64197  | 29453 | shortestDistance |
| chr6 | 125445245 | 125445896 | 652  | 2.48  | 1.18E-10 | 1.06E-08 | ENSMUSG00000003034  | Cd9         | protein_codi  | 125460266 | 125494791 | downstream   | 49221  | 14370 | shortestDistance |
| chr6 | 125447359 | 125447600 | 242  | 1.14  | 0.00844  | 0.0373   | ENSMUSG00000003034  | Cd9         | protein_codi  | 125460266 | 125494791 | downstream   | 47311  | 12666 | shortestDistance |
| chr6 | 125480960 | 125482827 | 1328 | 0.98  | 0.0022   | 0.0133   | ENSMUSG0000010119   | Gm28809     | antisense_RI  | 125481363 | 125484678 | overlapStart | 261    | 403   | shortestDistance |
| chr6 | 125509751 | 125510167 | 417  | 0.88  | 0.00839  | 0.0371   | ENSMUSG0000010116   | Gm26728     | processed_tr  | 125494424 | 125509135 | downstream   | 15535  | 616   | shortestDistance |
| chr6 | 125592826 | 125593114 | 289  | -1.73 | 0.00633  | 0.0299   | ENSMUSG00000003811  | Ano2        | protein_codi  | 125690419 | 126040126 | inside       | 302551 | 47012 | shortestDistance |
| chr6 | 126190160 | 126190840 | 681  | -2.22 | 3.69E-07 | 1.02E-05 | ENSMUSG00000004910  | Ntf3        | protein_codi  | 126101412 | 126166910 | upstream     | -23590 | 23250 | shortestDistance |
| chr6 | 126378519 | 126378871 | 353  | -2.23 | 0.000214 | 0.00209  | ENSMUSG0000010816   | Gm44431     | processed_p   | 126336867 | 126337279 | downstream   | 41828  | 41240 | shortestDistance |
| chr6 | 126811485 | 126811971 | 487  | -1.84 | 1.44E-06 | 3.18E-05 | ENSMUSG00000000393  | Ndufa9      | protein_codi  | 126821721 | 126849136 | downstream   | 37408  | 9750  | shortestDistance |
| chr6 | 127142990 | 127143583 | 594  | 0.98  | 0.0115   | 0.0472   | ENSMUSG00000000018  | Cncd2       | protein_codi  | 127125162 | 127152193 | inside       | 8907   | 8610  | shortestDistance |
| chr6 | 127150897 | 127151337 | 441  | 1.19  | 0.000327 | 0.00294  | ENSMUSG00000000018  | Cncd2       | protein_codi  | 127125162 | 127152193 | inside       | 1076   | 856   | shortestDistance |
| chr6 | 127236440 | 127236997 | 558  | 1.53  | 0.00565  | 0.0274   | ENSMUSG00000002636  | Gm4968      | processed_p   | 127233762 | 127234619 | downstream   | 2956   | 1821  | shortestDistance |
| chr6 | 127253866 | 127254421 | 556  | 1.45  | 0.000248 | 0.00235  | ENSMUSG0000010701   | Gm43635     | lincRNA       | 127251638 | 127254644 | inside       | 500    | 223   | shortestDistance |
| chr6 | 127263875 | 127264541 | 667  | 1.01  | 0.0042   | 0.0218   | ENSMUSG0000010701   | Gm43635     | lincRNA       | 127251638 | 127254644 | upstream     | -9564  | 9231  | shortestDistance |
| chr6 | 127273102 | 127273203 | 322  | 3.22  | 2.13E-08 | 8.93E-07 | ENSMUSG0000010724   | Gm43631     | processed_p   | 127367947 | 127368479 | downstream   | 16617  | 15924 | shortestDistance |
| chr6 | 127375594 | 127376008 | 415  | 1.79  | 1.92E-05 | 0.000286 | ENSMUSG0000010724   | Gm43631     | processed_p   | 127367947 | 127368479 | upstream     | -7322  | 7115  | shortestDistance |
| chr6 | 127529445 | 127530235 | 791  | 1.47  | 3.79E-05 | 0.00503  | ENSMUSG00000006141  | Cracr2a     | protein_codi  | 127561338 | 127674248 | upstream     | -31498 | 31103 | shortestDistance |
| chr6 | 127573863 | 127574513 | 651  | 1.86  | 1.71E-06 | 3.68E-05 | ENSMUSG00000006141  | Cracr2a     | protein_codi  | 127561338 | 127674248 | inside       | 12850  | 12525 | shortestDistance |
| chr6 | 127593279 | 127593900 | 622  | 1.59  | 7.26E-05 | 0.000857 | ENSMUSG00000006141  | Cracr2a     | protein_codi  | 127561338 | 127674248 | inside       | 32252  | 31941 | shortestDistance |
| chr6 | 127789934 | 127790694 | 761  | 3.58  | 4.96E-15 | 2.37E-12 | ENSMUSG0000010480   | Mir7233     | miRNA         | 127788084 | 127788143 | upstream     | -2171  | 1791  | shortestDistance |
| chr6 | 128044718 | 128045053 | 336  | 1.54  | 2.95E-05 | 0.000408 | ENSMUSG00000000393  | Tspan9      | protein_codi  | 127961396 | 128143594 | inside       | 98708  | 83322 | shortestDistance |
| chr6 | 128091374 | 128091821 | 448  | 0.99  | 0.0119   | 0.0484   | ENSMUSG00000000393  | Tspan9      | protein_codi  | 127961396 | 128143594 | inside       | 51996  | 51773 | shortestDistance |
| chr6 | 128217126 | 128217517 | 392  | 1.2   | 0.0036   | 0.0193   | ENSMUSG0000010828   | Gm8703      | processed_p   | 128213285 | 128214014 | upstream     | -3308  | 3112  | shortestDistance |
| chr6 | 128308369 | 128308926 | 558  | 1.08  | 0.0057   | 0.0275   | ENSMUSG00000005317  | Rpl18-ps2   | processed_p   | 128313357 | 128313923 | upstream     | -4709  | 4431  | shortestDistance |
| chr6 | 128404717 | 128405136 | 420  | -1.01 | 0.00985  | 0.042    | ENSMUSG000000000152 | Nrip2       | protein_codi  | 128399296 | 128416427 | inside       | 5630   | 5421  | shortestDistance |
| chr6 | 128411556 | 128411432 | 277  | 1.04  | 0.00851  | 0.0375   | ENSMUSG000000000152 | Nrip2       | protein_codi  | 128399296 | 128416427 | inside       | 11998  | 4995  | shortestDistance |
| chr6 | 128435512 | 128435852 | 341  | -1.13 | 0.00119  | 0.00817  | ENSMUSG00000003035  | Fkbp4       | protein_codi  | 128429735 | 128438677 | inside       | 2995   | 2825  | shortestDistance |
| chr6 | 128469339 | 128470033 | 695  | 1.12  | 0.0044   | 0.0226   | ENSMUSG00000005965  | Gm10069     | antisense_RI  | 128438757 | 128503281 | inside       | 30929  | 30582 | shortestDistance |
| chr6 | 128644067 | 128644301 | 235  | -1.03 | 0.0105   | 0.0441   | ENSMUSG00000003032  | Gm5884      | processed_p   | 128644913 | 128646391 | upstream     | -729   | 612   | shortestDistance |
| chr6 | 128786376 | 128786866 | 491  | 0.96  | 0.00763  | 0.0345   | ENSMUSG00000003032  | Klr1bc      | protein_codi  | 128778485 | 128789215 | inside       | 2594   | 2349  | shortestDistance |
| chr6 | 128796198 | 128796738 | 541  | 1.19  | 0.00043  | 0.00366  | ENSMUSG0000010787   | Gm44511     | protein_codi  | 128780285 | 128826315 | inside       | 29847  | 15913 | shortestDistance |
| chr6 | 128890849 | 128891373 | 525  | 1.16  | 0.00735  | 0.0335   | ENSMUSG000000000191 | BC035044    | protein_codi  | 128849090 | 128891126 | overlapStart | 15     | 247   | shortestDistance |
| chr6 | 128913570 | 128914288 | 719  | 1.47  | 0.00102  | 0.00728  | ENSMUSG0000010799   | Gm44223     | unprocessed   | 128919867 | 128919800 | upstream     | -5938  | 5579  | shortestDistance |
| chr6 | 129049723 | 129050303 | 581  | 1.48  | 1.86E-05 | 0.000278 | ENSMUSG0000010781   | Gm44000     | antisense_RI  | 129047277 | 129049835 | overlapStart | -178   | 112   | shortestDistance |
| chr6 | 129088545 | 129089004 | 460  | 1.25  | 0.0015   | 0.0098   | ENSMUSG00000000015  | Clec2e      | protein_codi  | 129091998 | 129100913 | downstream   | 12139  | 2994  | shortestDistance |
| chr6 | 129116258 | 129116616 | 359  | 1.44  | 0.00135  | 0.00903  | ENSMUSG00000007929  | Klr1bc-ps1  | transcribed_i | 129116518 | 129129446 | overlapStart | -81    | 98    | shortestDistance |
| chr6 | 129171676 | 129172040 | 365  | 4.19  | 3.59E-14 | 1.17E-11 | ENSMUSG00000008959  | Gm26160     | snRNA         | 129174820 | 129174882 | upstream     | -2962  | 2780  | shortestDistance |
| chr6 | 129234523 | 129235374 | 852  | 0.82  | 0.00804  | 0.0359   | ENSMUSG00000009735  | 23100001H17 | lincRNA       | 129208412 | 129238725 | inside       | 3777   | 3351  | shortestDistance |
| chr6 | 129235818 | 129236247 | 430  | 1.72  | 4.46E-06 | 8.33E-05 | ENSMUSG00000009735  | 23100001H17 | lincRNA       | 129208412 | 129238725 | inside       | 2693   | 2478  | shortestDistance |
| chr6 | 129273676 | 129274108 | 433  | 1.39  | 0.000278 | 0.00257  | ENSMUSG00000003015  | Cd69        | protein_codi  | 129267325 | 129275436 | inside       | 1544   | 1328  | shortestDistance |
| chr6 | 129275136 | 129275600 | 465  | 1.02  | 0.0104   | 0.0436   | ENSMUSG00000003015  | Cd69        | protein_codi  | 129267325 | 129275436 | overlapStart | 68     | 164   | shortestDistance |
| chr6 | 129275853 | 129276198 | 346  | 1.23  | 0.0104   | 0.0439   | ENSMUSG00000003015  | Cd69        | protein_codi  | 129267325 | 129275436 | upstream     | -590   | 417   | shortestDistance |
| chr6 | 129276490 | 129276848 | 359  | 1.25  | 0.000584 | 0.00467  | ENSMUSG00000003015  | Cd69        | protein_codi  | 129267325 | 129275436 | upstream     | -1233  | 1054  | shortestDistance |
| chr6 | 129349528 | 129350521 | 994  | 0.83  | 0.00695  | 0.0322   | ENSMUSG00000005306  | Clec12a     | protein_codi  | 129342691 | 129365303 | inside       | 7333   | 6837  | shortestDistance |
| chr6 | 129424288 | 129424601 | 314  | 1.21  | 0.00266  | 0.0153   | ENSMUSG00000004608  | Clec9a      | protein_codi  | 129408862 | 129424763 | inside       | 15582  | 162   | shortestDistance |
| chr6 | 129451312 | 129452053 | 742  | -1.29 | 0.00175  | 0.0111   | ENSMUSG00000003038  | Clec1a      | protein_codi  | 129424772 | 129452000 | overlapStart | 318    | 53    | shortestDistance |
| chr6 | 129506985 | 129507454 | 470  | 3.36  | 3.53E-11 | 3.84E-09 | ENSMUSG00000003016  | Olr1        | protein_codi  | 129485244 | 129507165 | overlapStart | -55    | 180   | shortestDistance |
| chr6 | 129514285 | 129       |      |       |          |          |                     |             |               |           |           |              |        |       |                  |

|      |           |           |      |       |          |          |                   |            |               |           |           |              |        |        |                  |
|------|-----------|-----------|------|-------|----------|----------|-------------------|------------|---------------|-----------|-----------|--------------|--------|--------|------------------|
| chr6 | 135188164 | 135189040 | 877  | 0.83  | 0.00662  | 0.031    | ENSMUSG0000010823 | Gm19434    | antisense_RI  | 135188480 | 135194960 | overlapStart | 122    | 316    | shortestDistance |
| chr6 | 135191947 | 135192215 | 269  | 1.35  | 0.000266 | 0.00249  | ENSMUSG0000010823 | Gm19434    | antisense_RI  | 135188480 | 135194960 | inside       | 3601   | 2745   | shortestDistance |
| chr6 | 135252395 | 135253127 | 733  | 1.01  | 0.00406  | 0.0212   | ENSMUSG000000302C | Gsp1       | protein_codi  | 135237326 | 135254351 | inside       | 1590   | 1224   | shortestDistance |
| chr6 | 135412668 | 135413077 | 410  | 1.69  | 4.50E-06 | 8.40E-05 | ENSMUSG000000302C | Emp1       | protein_codi  | 135362545 | 135383173 | downstream   | 50327  | 29495  | shortestDistance |
| chr6 | 135767596 | 135767955 | 360  | 2.65  | 3.65E-07 | 1.00E-05 | ENSMUSG000000302C | Gri2b      | protein_codi  | 135713233 | 136173511 | inside       | 405735 | 54363  | shortestDistance |
| chr6 | 136422395 | 136422716 | 322  | 1.15  | 0.00402  | 0.021    | ENSMUSG000000884C | Gm25882    | snRNA         | 136417812 | 136417896 | downstream   | 4744   | 4499   | shortestDistance |
| chr6 | 136431138 | 136431550 | 413  | 1.15  | 0.00481  | 0.0242   | ENSMUSG000000884C | Gm25882    | snRNA         | 136417812 | 136417896 | downstream   | 13532  | 13242  | shortestDistance |
| chr6 | 136492204 | 136492589 | 386  | 1.65  | 0.000116 | 0.00126  | ENSMUSG0000007114 | Rpl36a-ps3 | processed_p   | 136488807 | 136489127 | downstream   | 3589   | 3077   | shortestDistance |
| chr6 | 136497753 | 136498183 | 431  | 1.18  | 0.0027   | 0.0155   | ENSMUSG0000003021 | Atf7ip     | protein_codi  | 136506167 | 136610862 | upstream     | -8199  | 7984   | shortestDistance |
| chr6 | 136518508 | 136519472 | 965  | 0.75  | 0.0103   | 0.0435   | ENSMUSG000001077C | Gm44140    | bidirectional | 136514976 | 136519031 | overlapStart | 41     | 441    | shortestDistance |
| chr6 | 136645752 | 136646108 | 357  | 2.5   | 3.75E-07 | 1.03E-05 | ENSMUSG0000003021 | P1bld1     | protein_codi  | 136612070 | 136661928 | inside       | 15998  | 15820  | shortestDistance |
| chr6 | 136654359 | 136654940 | 582  | 1.92  | 1.60E-05 | 0.000246 | ENSMUSG0000003021 | P1bld1     | protein_codi  | 136612070 | 136661928 | inside       | 7278   | 6988   | shortestDistance |
| chr6 | 136672394 | 136672892 | 499  | -1.31 | 0.00281  | 0.016    | ENSMUSG0000003021 | P1bld1     | protein_codi  | 136612070 | 136661928 | upstream     | -10715 | 10466  | shortestDistance |
| chr6 | 136716023 | 136716472 | 450  | 2.47  | 5.80E-11 | 5.82E-09 | ENSMUSG0000004263 | Gucy2c     | protein_codi  | 136697284 | 136781765 | inside       | 65517  | 18739  | shortestDistance |
| chr6 | 136722611 | 136723178 | 568  | 0.99  | 0.00989  | 0.0421   | ENSMUSG0000004263 | Gucy2c     | protein_codi  | 136697284 | 136781765 | inside       | 58871  | 25327  | shortestDistance |
| chr6 | 136940006 | 136940330 | 325  | 1.21  | 0.00113  | 0.00788  | ENSMUSG0000003022 | Arhgdib    | protein_codi  | 136923655 | 136941899 | inside       | 1731   | 1569   | shortestDistance |
| chr6 | 136956986 | 136957424 | 439  | -1.17 | 0.00129  | 0.00875  | ENSMUSG0000006433 | Pde6h      | protein_codi  | 136923832 | 136968865 | inside       | 33373  | 11441  | shortestDistance |
| chr6 | 136964596 | 136965483 | 888  | 1.19  | 0.000749 | 0.00567  | ENSMUSG0000006433 | Pde6h      | protein_codi  | 136923832 | 136968865 | inside       | 41208  | 3382   | shortestDistance |
| chr6 | 136999780 | 136999983 | 204  | 3.91  | 1.85E-07 | 5.63E-06 | ENSMUSG0000010773 | Gm30055    | TEC           | 136986596 | 136987398 | downstream   | 13286  | 12382  | shortestDistance |
| chr6 | 137126209 | 137126700 | 492  | -1.18 | 0.000403 | 0.00348  | ENSMUSG0000003022 | Rerg       | protein_codi  | 137054825 | 137170497 | inside       | 44043  | 43797  | shortestDistance |
| chr6 | 137363050 | 137363310 | 261  | -1.46 | 0.000852 | 0.00629  | ENSMUSG0000003022 | Ptpro      | protein_codi  | 137252319 | 137463233 | inside       | 110861 | 99923  | shortestDistance |
| chr6 | 137386319 | 137386824 | 506  | 1.65  | 0.000138 | 0.00146  | ENSMUSG0000003022 | Ptpro      | protein_codi  | 137252319 | 137463233 | inside       | 134253 | 76409  | shortestDistance |
| chr6 | 137386997 | 137387268 | 272  | 1.45  | 0.00062  | 0.0049   | ENSMUSG0000003022 | Ptpro      | protein_codi  | 137252319 | 137463233 | inside       | 134613 | 75965  | shortestDistance |
| chr6 | 137503491 | 137503843 | 353  | -1.46 | 0.000614 | 0.00486  | ENSMUSG0000001576 | Eps8       | protein_codi  | 137477245 | 137654876 | inside       | 151209 | 26246  | shortestDistance |
| chr6 | 137630163 | 137630842 | 680  | -1.35 | 0.000729 | 0.00556  | ENSMUSG0000001576 | Eps8       | protein_codi  | 137477245 | 137654876 | inside       | 24374  | 24034  | shortestDistance |
| chr6 | 137690505 | 137691212 | 708  | -1.91 | 3.94E-05 | 0.000519 | ENSMUSG0000001576 | Eps8       | protein_codi  | 137477245 | 137654876 | upstream     | -35982 | 35629  | shortestDistance |
| chr6 | 137795171 | 137795929 | 759  | -1.19 | 0.000708 | 0.00544  | ENSMUSG0000003022 | Dera       | protein_codi  | 137754546 | 137857340 | inside       | 41004  | 40625  | shortestDistance |
| chr6 | 137836836 | 137837268 | 433  | 1.5   | 0.00888  | 0.0388   | ENSMUSG0000003022 | Dera       | protein_codi  | 137754546 | 137857340 | inside       | 82506  | 20072  | shortestDistance |
| chr6 | 137872132 | 137872719 | 588  | -1.07 | 0.00117  | 0.00807  | ENSMUSG0000003022 | Dera       | protein_codi  | 137754546 | 137857340 | downstream   | 117880 | 14792  | shortestDistance |
| chr6 | 137885662 | 137886178 | 517  | 2.21  | 9.65E-07 | 2.28E-05 | ENSMUSG0000003022 | Dera       | protein_codi  | 137754546 | 137857340 | downstream   | 131374 | 28322  | shortestDistance |
| chr6 | 137931118 | 137931845 | 728  | -0.96 | 0.00908  | 0.0395   | ENSMUSG0000009446 | Gm24308    | miRNA         | 137919858 | 137919971 | upstream     | -11511 | 11147  | shortestDistance |
| chr6 | 138071626 | 138072484 | 859  | 2.56  | 3.43E-13 | 7.53E-11 | ENSMUSG0000004437 | Slc15a5    | protein_codi  | 137983586 | 138079916 | inside       | 7861   | 7432   | shortestDistance |
| chr6 | 138075753 | 138076041 | 289  | 3.59  | 5.58E-13 | 1.13E-10 | ENSMUSG0000004437 | Slc15a5    | protein_codi  | 137983586 | 138079916 | inside       | 4019   | 3875   | shortestDistance |
| chr6 | 138163937 | 138164274 | 338  | -1.34 | 0.000367 | 0.00323  | ENSMUSG0000000854 | Mgst1      | protein_codi  | 138140316 | 138156755 | downstream   | 23790  | 7182   | shortestDistance |
| chr6 | 138364294 | 138364552 | 259  | -1.26 | 0.00972  | 0.0415   | ENSMUSG0000003022 | Lmo3       | protein_codi  | 138362918 | 138581968 | inside       | 217545 | 1376   | shortestDistance |
| chr6 | 138383084 | 138383793 | 710  | -1.06 | 0.00191  | 0.0119   | ENSMUSG0000003022 | Lmo3       | protein_codi  | 138362918 | 138581968 | inside       | 198530 | 20166  | shortestDistance |
| chr6 | 138382269 | 138423211 | 583  | -1.4  | 8.08E-05 | 0.000934 | ENSMUSG0000008959 | A830011K09 | antisense_RI  | 138423105 | 138429592 | overlapStart | -185   | 106    | shortestDistance |
| chr6 | 138471397 | 138471765 | 369  | -1.16 | 0.00582  | 0.028    | ENSMUSG0000003022 | Lmo3       | protein_codi  | 138362918 | 138581968 | inside       | 110387 | 108479 | shortestDistance |
| chr6 | 138477614 | 138478059 | 446  | -0.78 | 0.0105   | 0.044    | ENSMUSG0000003022 | Lmo3       | protein_codi  | 138362918 | 138581968 | inside       | 104132 | 103909 | shortestDistance |
| chr6 | 139248700 | 139249403 | 704  | -1.08 | 0.000651 | 0.00509  | ENSMUSG000000889C | Gm25434    | scaRNA        | 139196065 | 139196231 | upstream     | -52821 | 52469  | shortestDistance |
| chr6 | 139576327 | 139576623 | 297  | -1.18 | 0.00279  | 0.0159   | ENSMUSG0000010757 | A43G03     | TEC           | 139575924 | 139577205 | inside       | 730    | 403    | shortestDistance |
| chr6 | 139597502 | 139597967 | 466  | -2.16 | 2.36E-05 | 0.000339 | ENSMUSG0000003022 | Pik3c2g    | protein_codi  | 139587221 | 139969284 | inside       | 10513  | 10281  | shortestDistance |
| chr6 | 139735741 | 139736743 | 1003 | -1.11 | 0.00124  | 0.00845  | ENSMUSG0000003022 | Pik3c2g    | protein_codi  | 139587221 | 139969284 | inside       | 149021 | 148520 | shortestDistance |
| chr6 | 139741989 | 139742475 | 487  | -1.42 | 0.00164  | 0.0105   | ENSMUSG0000003022 | Pik3c2g    | protein_codi  | 139587221 | 139969284 | inside       | 155011 | 15468  | shortestDistance |
| chr6 | 139753169 | 139753497 | 329  | -2.48 | 1.42E-07 | 4.46E-06 | ENSMUSG0000003022 | Pik3c2g    | protein_codi  | 139587221 | 139969284 | inside       | 166112 | 165948 | shortestDistance |
| chr6 | 139861486 | 139862060 | 575  | 3.03  | 1.95E-15 | 1.06E-12 | ENSMUSG0000003022 | Pik3c2g    | protein_codi  | 139587221 | 139969284 | inside       | 274552 | 107224 | shortestDistance |
| chr6 | 139882016 | 139882386 | 371  | 1.99  | 6.10E-06 | 0.000109 | ENSMUSG0000003022 | Pik3c2g    | protein_codi  | 139587221 | 139969284 | inside       | 294980 | 86898  | shortestDistance |
| chr6 | 139942221 | 139942748 | 528  | -1.68 | 3.07E-06 | 6.07E-05 | ENSMUSG0000003022 | Pik3c2g    | protein_codi  | 139587221 | 139969284 | inside       | 355263 | 26536  | shortestDistance |
| chr6 | 140081629 | 140082196 | 568  | -0.97 | 0.00456  | 0.0232   | ENSMUSG0000010804 | Gm44158    | processed_p   | 140069994 | 140070498 | upstream     | -11414 | 11131  | shortestDistance |
| chr6 | 140090442 | 140090697 | 256  | -1.09 | 0.0102   | 0.043    | ENSMUSG0000010804 | Gm44158    | processed_p   | 140069994 | 140070498 | upstream     | -20072 | 19944  | shortestDistance |
| chr6 | 140147800 | 140148130 | 331  | -1.28 | 0.00321  | 0.0177   | ENSMUSG000001074C | Gm44159    | processed_p   | 140132067 | 140132508 | downstream   | 15898  | 15292  | shortestDistance |
| chr6 | 140206654 | 140207042 | 389  | -2.04 | 1.19E-07 | 3.86E-06 | ENSMUSG0000000855 | Gm24174    | rRNA          | 140166535 | 140166645 | upstream     | -40203 | 40009  | shortestDistance |
| chr6 | 140231583 | 140231905 | 323  | -1.03 | 0.00844  | 0.0373   | ENSMUSG0000010757 | Gm3961     | TEC           | 140295463 | 140296456 | downstream   | 64712  | 63558  | shortestDistance |
| chr6 | 140336297 | 140336965 | 669  | -1.27 | 0.00339  | 0.0184   | ENSMUSG0000006588 | R-Rs1168   | rRNA          | 140319630 | 140319733 | downstream   | 17001  | 16564  | shortestDistance |
| chr6 | 140337019 | 140337360 | 342  | -1.83 | 8.35E-06 | 0.000142 | ENSMUSG0000006588 | R-Rs1168   | rRNA          | 140319630 | 140319733 | downstream   | 17560  | 17286  | shortestDistance |
| chr6 | 140353753 | 140353967 | 395  | -1.81 | 5.55E-07 | 1.42E-05 | ENSMUSG0000006588 | R-Rs1168   | rRNA          | 140319630 | 140319733 | downstream   | 34140  | 33840  | shortestDistance |
| chr6 | 140357286 | 140357655 | 370  | -1.52 | 0.000335 | 0.003    | ENSMUSG0000006588 | R-Rs1168   | rRNA          | 140319630 | 140319733 | downstream   | 37840  | 37553  | shortestDistance |
| chr6 | 140466052 | 140466691 | 640  | -1.57 | 1.35E-05 | 0.000212 | ENSMUSG0000003023 | Plekha5    | protein_codi  | 140424054 | 140597110 | inside       | 42318  | 41998  | shortestDistance |
| chr6 | 140514289 | 140515148 | 860  | -1.08 | 0.000533 | 0.00434  | ENSMUSG0000003023 | Plekha5    | protein_codi  | 140424054 | 140597110 | inside       | 90664  | 81962  | shortestDistance |
| chr6 | 140523225 | 140523956 | 732  | -1.13 | 0.00872  | 0.0382   | ENSMUSG0000003023 | Plekha5    | protein_codi  | 140424054 | 140597110 | inside       | 99536  | 73154  | shortestDistance |
| chr6 | 140561046 | 140561708 | 663  | 0.9   | 0.0117   | 0.0477   | ENSMUSG0000003023 | Plekha5    | protein_codi  | 140424054 | 140597110 | inside       | 137323 | 35402  | shortestDistance |
| chr6 | 140593811 | 140594168 | 358  | 2.51  | 2.01E-06 | 4.22E-05 | ENSMUSG0000003023 | Plekha5    | protein_codi  | 140424054 | 140597110 | inside       | 169936 | 2942   | shortestDistance |
| chr6 | 140661109 | 140661533 | 425  | 2.76  | 2.40E-12 | 3.81E-10 | ENSMUSG0000003023 | Aebp2      | protein_codi  | 140622663 | 140678472 | inside       | 38658  | 16939  | shortestDistance |
| chr6 | 140789879 | 140790231 | 353  | -1.15 | 0.00146  | 0.00961  | ENSMUSG0000010803 | Gm43925    | processed_p   | 140784499 | 140784704 | upstream     | -5351  | 5175   | shortestDistance |
| chr6 | 140854557 | 140855091 | 535  | -0.96 | 0.00652  | 0.0306   | ENSMUSG0000010803 | Gm43925    | processed_p   | 140784499 | 140784704 | upstream     | -70120 | 69853  | shortestDistance |
| chr6 | 141054047 | 141054465 | 419  | -1.29 | 0.000815 | 0.0607   | ENSMUSG0000010763 | Gm30524    | lincRNA       | 140955609 | 141044134 | downstream   | 98647  | 9913   | shortestDistance |
| chr6 | 141065775 | 141066174 | 400  | 2.36  | 3.98E-08 | 1.52E-06 | ENSMUSG0000010763 | Gm30524    | lincRNA       | 140955609 | 141044134 | downstream   | 110365 | 21641  | shortestDistance |
| chr6 | 141097216 | 141098041 | 826  | -1.02 | 0.00151  | 0.00984  | ENSMUSG000001074C | Gm7384     | processed_p   | 141138047 | 141138576 | upstream     | -40419 | 40006  | shortestDistance |
| chr6 | 141169386 | 141169728 | 343  | -1.04 | 0.0075   | 0.034    | ENSMUSG000001074C | Gm7384     | processed_p   | 141138047 | 141138576 | downstream   | 31510  | 30810  |                  |

|      |            |           |      |       |          |          |                               |               |           |           |              |        |        |                  |
|------|------------|-----------|------|-------|----------|----------|-------------------------------|---------------|-----------|-----------|--------------|--------|--------|------------------|
| chr6 | 144269606  | 144270111 | 506  | 1.33  | 8.09E-05 | 0.000934 | ENSMUSG000000041545ox5        | protein_codi  | 143828425 | 144781977 | inside       | 512119 | 441181 | shortestDistance |
| chr6 | 144270291  | 144270718 | 428  | 1.38  | 2.75E-05 | 0.000385 | ENSMUSG000000041545ox5        | protein_codi  | 143828425 | 144781977 | inside       | 511473 | 441866 | shortestDistance |
| chr6 | 144570637  | 144571213 | 577  | 0.82  | 0.012    | 0.0488   | ENSMUSG000000041545ox5        | protein_codi  | 143828425 | 144781977 | inside       | 211052 | 210764 | shortestDistance |
| chr6 | 144644744  | 144645029 | 286  | 1.28  | 0.00344  | 0.0186   | ENSMUSG000000041545ox5        | protein_codi  | 143828425 | 144781977 | inside       | 137091 | 136948 | shortestDistance |
| chr6 | 144693289  | 144693980 | 692  | 1.49  | 0.000711 | 0.00545  | ENSMUSG000000085785ox5o3      | antisense_RI  | 144672868 | 144693834 | overlapEnd   | 20766  | 146    | shortestDistance |
| chr6 | 144742252  | 144743112 | 861  | 1.13  | 0.00127  | 0.00862  | ENSMUSG000000086285ox5o4      | antisense_RI  | 144720911 | 144759883 | inside       | 21771  | 16771  | shortestDistance |
| chr6 | 1448017409 | 144818537 | 1129 | 0.78  | 0.0124   | 0.0498   | ENSMUSG00000008785Gm27292     | snRNA         | 144803500 | 144803632 | upstream     | -14341 | 13777  | shortestDistance |
| chr6 | 1450021206 | 145002934 | 829  | 1.5   | 6.75E-06 | 0.000119 | ENSMUSG00000003026Bcat1       | protein_codi  | 144993835 | 145076184 | inside       | 73664  | 8271   | shortestDistance |
| chr6 | 145022993  | 145023279 | 287  | 1.23  | 0.00397  | 0.0208   | ENSMUSG00000003026Bcat1       | protein_codi  | 144993835 | 145076184 | inside       | 53048  | 29158  | shortestDistance |
| chr6 | 145069384  | 145069806 | 423  | 1.79  | 1.20E-05 | 0.000193 | ENSMUSG00000003026Bcat1       | protein_codi  | 144993835 | 145076184 | inside       | 6589   | 6378   | shortestDistance |
| chr6 | 145069969  | 145070299 | 331  | 1.24  | 0.00255  | 0.0149   | ENSMUSG00000003026Bcat1       | protein_codi  | 144993835 | 145076184 | inside       | 6050   | 5885   | shortestDistance |
| chr6 | 145115388  | 145115870 | 483  | 1.31  | 0.000464 | 0.0039   | ENSMUSG00000003026Lrmp        | protein_codi  | 145115653 | 145174934 | overlapStart | -24    | 217    | shortestDistance |
| chr6 | 145123822  | 145124102 | 281  | 1.22  | 0.000916 | 0.00665  | ENSMUSG00000003026Lrmp        | protein_codi  | 145115653 | 145174934 | inside       | 8309   | 8169   | shortestDistance |
| chr6 | 145129603  | 145129886 | 284  | 1.12  | 0.0123   | 0.0497   | ENSMUSG00000003026Lrmp        | protein_codi  | 145115653 | 145174934 | inside       | 14091  | 13950  | shortestDistance |
| chr6 | 145139639  | 145140420 | 782  | 1.03  | 0.00365  | 0.0195   | ENSMUSG00000003026Lrmp        | protein_codi  | 145115653 | 145174934 | inside       | 24377  | 23986  | shortestDistance |
| chr6 | 145149001  | 145149502 | 502  | 1.72  | 0.000438 | 0.00372  | ENSMUSG00000003026Lrmp        | protein_codi  | 145115653 | 145174934 | inside       | 33599  | 25432  | shortestDistance |
| chr6 | 145210582  | 145211467 | 886  | 0.82  | 0.00629  | 0.0297   | ENSMUSG00000004354Cas1        | protein_codi  | 145174834 | 145211005 | overlapStart | -19    | 423    | shortestDistance |
| chr6 | 145249315  | 145250863 | 1549 | 0.92  | 0.00273  | 0.0156   | ENSMUSG00000003026Kras        | protein_codi  | 145216699 | 145250239 | overlapStart | 150    | 624    | shortestDistance |
| chr6 | 145302899  | 145303283 | 385  | 1.05  | 0.00119  | 0.00821  | ENSMUSG000000087272010013824  | lincRNA       | 145303152 | 145308951 | overlapStart | -61    | 131    | shortestDistance |
| chr6 | 145322331  | 145322886 | 556  | 2.97  | 1.94E-09 | 1.13E-07 | ENSMUSG00000008396Gm15707     | processed_p   | 145315613 | 145316608 | upstream     | -6000  | 5723   | shortestDistance |
| chr6 | 145326199  | 145326792 | 594  | 2.31  | 2.44E-08 | 1.01E-06 | ENSMUSG00000008396Gm15707     | processed_p   | 145315613 | 145316608 | upstream     | -9888  | 9591   | shortestDistance |
| chr6 | 145340582  | 145341589 | 1008 | 0.86  | 0.00582  | 0.028    | ENSMUSG00000005496Lmttd1      | protein_codi  | 145365134 | 145614319 | downstream   | 273233 | 23545  | shortestDistance |
| chr6 | 145346185  | 145348869 | 685  | 1.45  | 5.62E-05 | 0.000696 | ENSMUSG00000005496Lmttd1      | protein_codi  | 145365134 | 145614319 | downstream   | 265792 | 12655  | shortestDistance |
| chr6 | 145471828  | 145472262 | 435  | -1.79 | 0.000507 | 0.00417  | ENSMUSG00000005496Lmttd1      | protein_codi  | 145365134 | 145614319 | inside       | 142274 | 106694 | shortestDistance |
| chr6 | 145508760  | 145509687 | 928  | 1.03  | 0.00446  | 0.0228   | ENSMUSG00000005496Lmttd1      | protein_codi  | 145365134 | 145614319 | inside       | 105095 | 104632 | shortestDistance |
| chr6 | 145765003  | 145765369 | 367  | 1.93  | 2.47E-05 | 0.000352 | ENSMUSG00000003025Rassf8      | protein_codi  | 145746748 | 145821079 | inside       | 18438  | 18255  | shortestDistance |
| chr6 | 145830138  | 145830517 | 380  | 1.22  | 0.00127  | 0.0086   | ENSMUSG00000003025Rassf8      | protein_codi  | 145746748 | 145821079 | downstream   | 83580  | 9059   | shortestDistance |
| chr6 | 145862972  | 145863488 | 517  | 0.92  | 0.00885  | 0.0386   | ENSMUSG0000010812Gm43909      | TEC           | 145863297 | 145865172 | overlapStart | -67    | 191    | shortestDistance |
| chr6 | 145952596  | 145953050 | 455  | -1.19 | 0.00391  | 0.0206   | ENSMUSG00000008541Spsnos      | antisense_RI  | 145951656 | 145957534 | inside       | 4711   | 940    | shortestDistance |
| chr6 | 146107192  | 146107923 | 732  | 1.33  | 0.000412 | 0.00355  | ENSMUSG00000003028Htp2        | protein_codi  | 146108299 | 146502223 | downstream   | 394665 | 376    | shortestDistance |
| chr6 | 146162593  | 146162992 | 400  | 1.18  | 0.00268  | 0.0154   | ENSMUSG00000003028Htp2        | protein_codi  | 146108299 | 146502223 | inside       | 339431 | 54294  | shortestDistance |
| chr6 | 146170412  | 146171182 | 771  | 1.84  | 1.77E-05 | 0.000267 | ENSMUSG00000003028Htp2        | protein_codi  | 146108299 | 146502223 | inside       | 331426 | 62113  | shortestDistance |
| chr6 | 146215380  | 146215819 | 440  | 1.04  | 0.00745  | 0.0339   | ENSMUSG00000003028Htp2        | protein_codi  | 146108299 | 146502223 | inside       | 286623 | 107081 | shortestDistance |
| chr6 | 146306040  | 146306315 | 276  | 1.91  | 0.000157 | 0.00162  | ENSMUSG00000003028Htp2        | protein_codi  | 146108299 | 146502223 | inside       | 196045 | 195908 | shortestDistance |
| chr6 | 146313435  | 146313813 | 379  | 2.15  | 3.57E-07 | 9.86E-06 | ENSMUSG00000003028Htp2        | protein_codi  | 146108299 | 146502223 | inside       | 188599 | 188410 | shortestDistance |
| chr6 | 146397550  | 146398260 | 711  | 1.39  | 0.000512 | 0.00421  | ENSMUSG00000003028Htp2        | protein_codi  | 146108299 | 146502223 | inside       | 104318 | 103963 | shortestDistance |
| chr6 | 146674931  | 146675575 | 645  | 1.54  | 0.00056  | 0.00101  | ENSMUSG000000085234930479017  | lincRNA       | 146657218 | 146665403 | downstream   | 18035  | 9528   | shortestDistance |
| chr6 | 146759006  | 146759451 | 446  | 1.02  | 0.00956  | 0.041    | ENSMUSG00000001635Stk38l      | protein_codi  | 146724995 | 146778812 | inside       | 34233  | 19361  | shortestDistance |
| chr6 | 146775818  | 146776193 | 316  | 2.39  | 0.000162 | 0.00166  | ENSMUSG00000001635Stk38l      | protein_codi  | 146724995 | 146778812 | inside       | 51041  | 2619   | shortestDistance |
| chr6 | 146776601  | 146777344 | 744  | 0.99  | 0.00159  | 0.0103   | ENSMUSG00000001635Stk38l      | protein_codi  | 146724995 | 146778812 | inside       | 51977  | 1468   | shortestDistance |
| chr6 | 147051456  | 147052114 | 659  | 3.32  | 6.22E-11 | 1.86E-11 | ENSMUSG00000004011Mrps35      | protein_codi  | 147042764 | 147073991 | inside       | 9021   | 8692   | shortestDistance |
| chr6 | 147310464  | 147310965 | 502  | 3.94  | 1.82E-14 | 6.84E-12 | ENSMUSG00000008102Gm15766     | processed_p   | 147271837 | 147272649 | downstream   | 38877  | 37815  | shortestDistance |
| chr6 | 147316121  | 147316748 | 628  | 2.5   | 2.74E-10 | 2.15E-08 | ENSMUSG00000008102Gm15766     | processed_p   | 147271837 | 147272649 | downstream   | 44597  | 43472  | shortestDistance |
| chr6 | 147349451  | 147350214 | 764  | 1.2   | 0.00107  | 0.00753  | ENSMUSG00000008102Gm15766     | processed_p   | 147271837 | 147272649 | downstream   | 77995  | 76802  | shortestDistance |
| chr6 | 147374582  | 147575485 | 904  | -1.01 | 0.000833 | 0.0618   | ENSMUSG0000000303Cdc91        | protein_codi  | 147475828 | 147632612 | inside       | 99206  | 7127   | shortestDistance |
| chr6 | 147664187  | 147664726 | 540  | 1.71  | 8.22E-06 | 0.00014  | ENSMUSG000000085071700049E15f | lincRNA       | 147690241 | 147702374 | upstream     | -25785 | 25515  | shortestDistance |
| chr6 | 147798929  | 147799699 | 771  | 1.68  | 0.000403 | 0.00348  | ENSMUSG000000085071700049E15f | lincRNA       | 147709982 | 147719451 | upstream     | -79863 | 79478  | shortestDistance |
| chr6 | 147885760  | 147886312 | 553  | 2.15  | 3.82E-08 | 1.47E-06 | ENSMUSG00000008677Far2os2     | antisense_RI  | 148006580 | 148047339 | downstream   | 161303 | 120268 | shortestDistance |
| chr6 | 148101953  | 148102285 | 333  | 1.45  | 0.000886 | 0.00648  | ENSMUSG00000003030Far2        | protein_codi  | 148047259 | 148182758 | inside       | 54860  | 54694  | shortestDistance |
| chr6 | 148102485  | 148102740 | 256  | 1.88  | 5.75E-06 | 0.000103 | ENSMUSG00000003030Far2        | protein_codi  | 148047259 | 148182758 | inside       | 55353  | 55226  | shortestDistance |
| chr6 | 148105719  | 148106174 | 456  | 3.05  | 3.94E-14 | 1.27E-11 | ENSMUSG00000003030Far2        | protein_codi  | 148047259 | 148182758 | inside       | 58687  | 58460  | shortestDistance |
| chr6 | 148108846  | 148109587 | 742  | 1.11  | 0.000674 | 0.00523  | ENSMUSG00000003030Far2        | protein_codi  | 148047259 | 148182758 | inside       | 61957  | 61587  | shortestDistance |
| chr6 | 148354468  | 148354815 | 348  | 1.18  | 0.00947  | 0.0407   | ENSMUSG00000006317Rps4l       | transcribed_1 | 148354656 | 148355598 | overlapStart | -14    | 159    | shortestDistance |
| chr6 | 148371129  | 148371604 | 326  | 1.87  | 8.01E-05 | 0.000928 | ENSMUSG00000003030Tmtc1       | protein_codi  | 148232430 | 148444389 | inside       | 72947  | 72785  | shortestDistance |
| chr6 | 148381100  | 148381544 | 445  | 2.91  | 2.61E-09 | 1.46E-07 | ENSMUSG00000003030Tmtc1       | protein_codi  | 148232430 | 148444389 | inside       | 63067  | 62845  | shortestDistance |
| chr6 | 148413694  | 148413950 | 257  | 1.82  | 0.000353 | 0.00313  | ENSMUSG00000003030Tmtc1       | protein_codi  | 148232430 | 148444389 | inside       | 30567  | 30439  | shortestDistance |
| chr6 | 148577622  | 148578218 | 597  | 1.63  | 9.71E-05 | 0.00109  | ENSMUSG00000007099Gm6313      | lincRNA       | 148606786 | 148614309 | downstream   | 36389  | 28568  | shortestDistance |
| chr6 | 148708432  | 148708775 | 344  | 1.32  | 0.0032   | 0.0176   | ENSMUSG0000010740Gm44115      | lincRNA       | 148701998 | 148712269 | inside       | 6606   | 3494   | shortestDistance |
| chr6 | 148782931  | 148783289 | 359  | -1.38 | 0.000901 | 0.00656  | ENSMUSG0000010740Gm44115      | lincRNA       | 148701998 | 148712269 | downstream   | 31112  | 20662  | shortestDistance |
| chr6 | 148912162  | 148912505 | 344  | 1.71  | 5.98E-05 | 0.000735 | ENSMUSG0000010825Gm43913      | lincRNA       | 148915215 | 148920535 | downstream   | 8201   | 2710   | shortestDistance |
| chr6 | 149233926  | 149234440 | 515  | 1.03  | 0.00605  | 0.0289   | ENSMUSG0000010752170003116H   | lincRNA       | 149199095 | 149215185 | upstream     | -18998 | 18741  | shortestDistance |
| chr6 | 149260702  | 149261350 | 649  | 2.52  | 1.48E-10 | 1.28E-08 | ENSMUSG0000010789Gm10388      | TEC           | 149283838 | 149286773 | downstream   | 25747  | 22488  | shortestDistance |
| chr6 | 149323560  | 149324477 | 918  | -1.2  | 0.00244  | 0.0143   | ENSMUSG000000032712810474019  | protein_codi  | 149309414 | 149335663 | inside       | 14604  | 11186  | shortestDistance |
| chr6 | 149342743  | 149343065 | 323  | 1.38  | 0.000147 | 0.00154  | ENSMUSG000000032712810474019  | protein_codi  | 149309414 | 149335663 | downstream   | 33490  | 7080   | shortestDistance |
| chr6 | 149348285  | 149348578 | 294  | 1.1   | 0.00282  | 0.016    | ENSMUSG00000008408Gm15782     | processed_p   | 149353382 | 149353826 | downstream   | 5394   | 4804   | shortestDistance |
| chr6 | 149472146  | 149472563 | 418  | 2.16  | 3.63E-07 | 9.99E-06 | ENSMUSG0000000345Bicld1       | protein_codi  | 149408886 | 149563329 | inside       | 63468  | 63260  | shortestDistance |
| chr6 | 149473483  | 149473806 | 324  | 1.8   | 9.28E-05 | 0.00105  | ENSMUSG0000000345Bicld1       | protein_codi  | 149408886 | 149563329 | inside       | 64758  | 64597  | shortestDistance |
| chr7 | 3193991    | 3194293   | 303  | -1.17 | 0.00253  | 0.0148   | ENSMUSG0000010747Gm3375       | processed_p   | 3181093   | 3181888   | downstream   | 13049  | 12103  | shortestDistance |
| chr7 | 3221980    | 3222351   | 372  | -1.45 | 0.000429 | 0.00365  | ENSMUSG00000007881Nlrp12      | protein_codi  | 3218784   | 3249740   | inside       | 27574  | 3196   | shortestDistance |
| chr7 | 3249538    | 3250007   | 470  | 2.91  | 2.88E-09 | 1.59E-07 | ENSMUSG00000007881Nlrp12      | protein_codi  | 3218784   | 3249740   | overlapStart | -32    | 202    | shortestDistance |
| chr7 | 3330189    | 3330522   | 334  | -1.01 | 0.0122   | 0.049    |                               |               |           |           |              |        |        |                  |

|      |          |          |      |       |          |          |                                    |              |          |          |              |        |       |                  |
|------|----------|----------|------|-------|----------|----------|------------------------------------|--------------|----------|----------|--------------|--------|-------|------------------|
| chr7 | 12803166 | 12804232 | 1067 | -0.75 | 0.0124   | 0.05     | ENSMUSG0000007082Zscan18           | protein_codi | 12768090 | 12803635 | overlapStart | -64    | 469   | shortestDistance |
| chr7 | 12818381 | 12819206 | 826  | -1.06 | 0.000365 | 0.00322  | ENSMUSG0000005789Zfp329            | protein_codi | 12804977 | 12818858 | overlapStart | 64     | 348   | shortestDistance |
| chr7 | 12834279 | 12835384 | 1106 | -0.78 | 0.00666  | 0.0311   | ENSMUSG00000005863Zfp120           | protein_codi | 12834761 | 12850577 | overlapStart | 71     | 482   | shortestDistance |
| chr7 | 12880624 | 12881931 | 1308 | -0.73 | 0.0114   | 0.047    | ENSMUSG0000006039Zfp128            | protein_codi | 12881177 | 12893422 | overlapStart | 101    | 553   | shortestDistance |
| chr7 | 13294127 | 13294871 | 745  | -1.21 | 0.00527  | 0.0259   | ENSMUSG0000005639Lig1              | protein_codi | 13277283 | 13311433 | inside       | 17216  | 16562 | shortestDistance |
| chr7 | 13321275 | 13321946 | 672  | -1.73 | 6.46E-05 | 0.000782 | ENSMUSG0000003384Pla2g4c           | protein_codi | 13324655 | 13360672 | upstream     | -3045  | 2709  | shortestDistance |
| chr7 | 13511559 | 13511901 | 343  | -1.06 | 0.00248  | 0.0145   | ENSMUSG0000009864Bsp42-ps          | unprocessed  | 13525633 | 13526068 | upstream     | -13903 | 13732 | shortestDistance |
| chr7 | 14317249 | 14317561 | 313  | -1.08 | 0.00642  | 0.0302   | ENSMUSG0000009850Pfh20-ps          | processed_p  | 14304780 | 14307665 | downstream   | 12625  | 9584  | shortestDistance |
| chr7 | 15933469 | 15933972 | 504  | -0.93 | 0.0123   | 0.0496   | ENSMUSG0000004156Nop53             | protein_codi | 15936183 | 15946074 | downstream   | 12354  | 2211  | shortestDistance |
| chr7 | 15962248 | 15962695 | 448  | -2.24 | 7.69E-06 | 0.000132 | ENSMUSG0000007436Ehd2              | protein_codi | 15946958 | 15967567 | inside       | 5095   | 4872  | shortestDistance |
| chr7 | 16197217 | 16197565 | 349  | -1.31 | 0.0037   | 0.0197   | ENSMUSG0000000601Dhx34             | protein_codi | 16197147 | 16222037 | inside       | 24646  | 70    | shortestDistance |
| chr7 | 16200935 | 16201552 | 618  | -1.53 | 0.000111 | 0.00121  | ENSMUSG0000000601Dhx34             | protein_codi | 16197147 | 16222037 | inside       | 20793  | 3788  | shortestDistance |
| chr7 | 16239583 | 16240091 | 509  | 1.15  | 0.00761  | 0.0344   | ENSMUSG0000007436Csa2r             | protein_codi | 16234585 | 16244154 | inside       | 4317   | 4063  | shortestDistance |
| chr7 | 16257772 | 16258229 | 458  | 3.39  | 3.10E-10 | 2.37E-08 | ENSMUSG00000004913Csa1r            | protein_codi | 16246743 | 16259540 | inside       | 1540   | 1311  | shortestDistance |
| chr7 | 16285373 | 16286972 | 1600 | 0.81  | 0.00862  | 0.0379   | ENSMUSG00000004137Cdc9             | protein_codi | 16274042 | 16286795 | overlapStart | 623    | 177   | shortestDistance |
| chr7 | 16364324 | 16365040 | 717  | -1.09 | 0.00448  | 0.0229   | ENSMUSG00000005283Sae1             | protein_codi | 16320234 | 16387806 | inside       | 23124  | 22766 | shortestDistance |
| chr7 | 16405638 | 16406386 | 749  | 0.87  | 0.0103   | 0.0435   | ENSMUSG00000005927Zc3ha            | protein_codi | 16400910 | 16437696 | inside       | 5102   | 4728  | shortestDistance |
| chr7 | 16505305 | 16505618 | 314  | 3.12  | 4.45E-08 | 1.67E-06 | ENSMUSG00000005823Arhgap35         | protein_codi | 16493719 | 16614993 | inside       | 109531 | 11586 | shortestDistance |
| chr7 | 16558157 | 16558522 | 366  | -1.39 | 4.15E-05 | 0.000542 | ENSMUSG00000005823Arhgap35         | protein_codi | 16493719 | 16614993 | inside       | 56653  | 56471 | shortestDistance |
| chr7 | 16570741 | 16571118 | 378  | -1.27 | 0.00233  | 0.0139   | ENSMUSG00000005823Arhgap35         | protein_codi | 16493719 | 16614993 | inside       | 44063  | 43875 | shortestDistance |
| chr7 | 16571252 | 16571586 | 335  | -1.19 | 0.00168  | 0.0107   | ENSMUSG00000005823Arhgap35         | protein_codi | 16493719 | 16614993 | inside       | 43574  | 43407 | shortestDistance |
| chr7 | 16633878 | 16634224 | 347  | -1.29 | 0.00102  | 0.00725  | ENSMUSG0000010058Gm29443           | antisense_RI | 16613824 | 16632643 | downstream   | 20227  | 1235  | shortestDistance |
| chr7 | 16974014 | 16974558 | 545  | 2.65  | 4.48E-10 | 3.24E-08 | ENSMUSG0000010834Gm42372           | protein_codi | 16983086 | 16988152 | upstream     | -8800  | 8528  | shortestDistance |
| chr7 | 16982895 | 16983255 | 361  | -1.47 | 0.000334 | 0.00299  | ENSMUSG0000010834Gm42372           | protein_codi | 16983086 | 16988152 | overlapStart | -11    | 169   | shortestDistance |
| chr7 | 16991706 | 16992006 | 301  | -1.07 | 0.00675  | 0.0315   | ENSMUSG00000004111Cdc8             | protein_codi | 16992708 | 16997516 | upstream     | -852   | 702   | shortestDistance |
| chr7 | 17009732 | 17009843 | 472  | -1.02 | 0.00287  | 0.0162   | ENSMUSG0000000309Ppp5c             | protein_codi | 17004640 | 17027924 | inside       | 18316  | 4732  | shortestDistance |
| chr7 | 17016956 | 17017402 | 447  | -0.96 | 0.00263  | 0.0152   | ENSMUSG0000000309Ppp5c             | protein_codi | 17004640 | 17027924 | inside       | 10745  | 10522 | shortestDistance |
| chr7 | 17058076 | 17058748 | 673  | -1.04 | 0.00761  | 0.0344   | ENSMUSG0000010880483340402fTEC     | protein_codi | 17058534 | 17059441 | overlapStart | -122   | 214   | shortestDistance |
| chr7 | 17060667 | 17060369 | 303  | -1.08 | 0.0012   | 0.00825  | ENSMUSG00000000432Hif3a            | protein_codi | 17031507 | 17062427 | inside       | 2209   | 2058  | shortestDistance |
| chr7 | 17073826 | 17074194 | 369  | -0.93 | 0.00487  | 0.0244   | ENSMUSG00000006676Psg16            | protein_codi | 17074040 | 17133450 | overlapStart | -30    | 154   | shortestDistance |
| chr7 | 17074241 | 17074674 | 434  | -1.57 | 9.29E-05 | 0.00105  | ENSMUSG00000006676Psg16            | protein_codi | 17074040 | 17133450 | inside       | 418    | 201   | shortestDistance |
| chr7 | 18679870 | 18680327 | 458  | -0.93 | 0.0106   | 0.0444   | ENSMUSG0000000363Psg20             | protein_codi | 18674107 | 18686185 | inside       | 6087   | 5763  | shortestDistance |
| chr7 | 18749682 | 18750289 | 608  | -0.89 | 0.0111   | 0.046    | ENSMUSG00000009647Gm24464          | snRNA        | 18745103 | 18745209 | upstream     | -4777  | 4473  | shortestDistance |
| chr7 | 18839795 | 18840170 | 1276 | -0.96 | 0.00126  | 0.00857  | ENSMUSG00000004098Mil2             | protein_codi | 18839966 | 18865402 | overlapStart | 466    | 171   | shortestDistance |
| chr7 | 19012028 | 19012765 | 738  | -0.99 | 0.00197  | 0.0122   | ENSMUSG00000004089Foxa3            | protein_codi | 19013284 | 19023538 | downstream   | 11142  | 519   | shortestDistance |
| chr7 | 19048045 | 19048574 | 530  | -1.56 | 0.00459  | 0.0233   | ENSMUSG00000002311Sympk            | protein_codi | 19024377 | 19054618 | inside       | 23933  | 6044  | shortestDistance |
| chr7 | 19175644 | 19175999 | 356  | 1.92  | 2.80E-06 | 5.62E-05 | ENSMUSG00000004081Em12             | protein_codi | 19176421 | 19206482 | upstream     | -599   | 422   | shortestDistance |
| chr7 | 19234922 | 19235557 | 636  | 1.97  | 2.96E-06 | 5.89E-05 | ENSMUSG00000005221Opa3             | protein_codi | 19228334 | 19256543 | inside       | 6906   | 6588  | shortestDistance |
| chr7 | 19257333 | 19257950 | 618  | 0.97  | 0.00559  | 0.0272   | ENSMUSG00000003040Vasp             | protein_codi | 19256929 | 19271817 | inside       | 14175  | 404   | shortestDistance |
| chr7 | 19282372 | 19282806 | 435  | 1.15  | 0.00152  | 0.00994  | ENSMUSG00000003040Rtn              | protein_codi | 19282624 | 19296160 | overlapStart | -35    | 182   | shortestDistance |
| chr7 | 19303830 | 19304140 | 311  | -1.28 | 0.00183  | 0.0115   | ENSMUSG00000000354Fosb             | protein_codi | 19302696 | 19310051 | inside       | 6066   | 1134  | shortestDistance |
| chr7 | 19338090 | 19338399 | 310  | 1.73  | 6.10E-05 | 0.000746 | ENSMUSG0000010885D830036231lincRNA | protein_codi | 19320117 | 19342515 | inside       | 4271   | 4116  | shortestDistance |
| chr7 | 19664726 | 19665889 | 1164 | 0.88  | 0.00562  | 0.0273   | ENSMUSG0000000298C1ptm1            | protein_codi | 19631571 | 19665033 | overlapStart | -275   | 307   | shortestDistance |
| chr7 | 19693419 | 19694198 | 780  | 1.45  | 0.00116  | 0.00801  | ENSMUSG00000004056ApoC1            | protein_codi | 19689481 | 19692660 | upstream     | -1148  | 759   | shortestDistance |
| chr7 | 19744493 | 19744997 | 505  | 1.32  | 0.000538 | 0.00437  | ENSMUSG00000006230Nectin2          | protein_codi | 19716644 | 19750483 | inside       | 5738   | 5486  | shortestDistance |
| chr7 | 19749400 | 19750033 | 634  | 0.85  | 0.00741  | 0.0338   | ENSMUSG00000006230Nectin2          | protein_codi | 19716644 | 19750483 | inside       | 767    | 450   | shortestDistance |
| chr7 | 19753574 | 19753973 | 400  | -1.27 | 0.0016   | 0.0103   | ENSMUSG0000000298Bcam              | protein_codi | 19756131 | 19771016 | downstream   | 17242  | 2158  | shortestDistance |
| chr7 | 19769676 | 19770031 | 356  | -1.51 | 9.38E-05 | 0.00106  | ENSMUSG0000000298Bcam              | protein_codi | 19756131 | 19771016 | inside       | 1162   | 985   | shortestDistance |
| chr7 | 19770312 | 19770837 | 526  | -1.02 | 0.00275  | 0.0157   | ENSMUSG0000000298Bcam              | protein_codi | 19756131 | 19771016 | inside       | 442    | 179   | shortestDistance |
| chr7 | 19789727 | 19790418 | 692  | -0.76 | 0.012    | 0.0488   | ENSMUSG00000004052Cblc             | protein_codi | 19778881 | 19796809 | inside       | 6737   | 6391  | shortestDistance |
| chr7 | 19831853 | 19832190 | 338  | 1.25  | 0.00137  | 0.00915  | ENSMUSG00000003517Bcd3             | protein_codi | 19808462 | 19822770 | upstream     | -9252  | 9083  | shortestDistance |
| chr7 | 19855623 | 19856118 | 496  | 1.39  | 0.000159 | 0.00163  | ENSMUSG00000009221Gm19345          | protein_codi | 19852003 | 19858350 | inside       | 3867   | 2232  | shortestDistance |
| chr7 | 19856285 | 19856603 | 319  | 1.46  | 0.000513 | 0.00422  | ENSMUSG00000009221Gm19345          | protein_codi | 19852003 | 19858350 | inside       | 4441   | 1747  | shortestDistance |
| chr7 | 19923214 | 19923776 | 563  | -0.86 | 0.0123   | 0.0497   | ENSMUSG0000000907Gm16251           | antisense_RI | 19920729 | 19927607 | inside       | 2766   | 2485  | shortestDistance |
| chr7 | 23968070 | 23968360 | 291  | -1.07 | 0.00722  | 0.0331   | ENSMUSG000000010906Gm5324          | unprocessed  | 23965140 | 23965615 | downstream   | 3075   | 2455  | shortestDistance |
| chr7 | 24112357 | 24113521 | 1165 | -1.45 | 7.30E-06 | 0.000127 | ENSMUSG00000005267Zfp112           | protein_codi | 24112314 | 24127952 | inside       | 625    | 43    | shortestDistance |
| chr7 | 24133821 | 24134525 | 705  | -0.85 | 0.00407  | 0.0213   | ENSMUSG00000004760Zfp235           | protein_codi | 24134169 | 24143241 | overlapStart | 4      | 348   | shortestDistance |
| chr7 | 24142480 | 24143063 | 584  | -1.06 | 0.00241  | 0.0142   | ENSMUSG00000004760Zfp235           | protein_codi | 24134169 | 24143241 | inside       | 8603   | 178   | shortestDistance |
| chr7 | 24270122 | 24270710 | 589  | -0.95 | 0.002    | 0.0123   | ENSMUSG00000005530Zfp93            | protein_codi | 24270420 | 24277794 | overlapStart | -4     | 290   | shortestDistance |
| chr7 | 24300837 | 24301142 | 306  | -0.9  | 0.00779  | 0.0351   | ENSMUSG00000005060Zfp61            | protein_codi | 24291039 | 24301232 | inside       | 242    | 90    | shortestDistance |
| chr7 | 24430913 | 24431319 | 407  | -1.91 | 1.25E-05 | 2.00E-04 | ENSMUSG00000006202Irgc1            | protein_codi | 24431922 | 24452297 | downstream   | 21181  | 603   | shortestDistance |
| chr7 | 24442308 | 24442732 | 425  | 2.1   | 5.70E-05 | 0.000704 | ENSMUSG00000006202Irgc1            | protein_codi | 24431922 | 24452297 | inside       | 9777   | 9565  | shortestDistance |
| chr7 | 24499820 | 24500258 | 439  | -1.12 | 0.00458  | 0.0233   | ENSMUSG00000005479Cadm4            | protein_codi | 24482023 | 24504539 | inside       | 18016  | 4281  | shortestDistance |
| chr7 | 24735742 | 24736555 | 814  | -1.19 | 0.00158  | 0.0102   | ENSMUSG0000010840Gm44972           | processed_p  | 24729720 | 24730125 | upstream     | -6023  | 5617  | shortestDistance |
| chr7 | 24802235 | 24802773 | 539  | -1.78 | 3.27E-06 | 6.41E-05 | ENSMUSG00000001135Gm5893           | processed_tr | 24818795 | 24840275 | upstream     | -16291 | 16022 | shortestDistance |
| chr7 | 24838736 | 24839324 | 499  | 1.23  | 0.00186  | 0.0116   | ENSMUSG00000001135Gm5893           | processed_tr | 24818795 | 24840275 | inside       | 20190  | 1041  | shortestDistance |
| chr7 | 24850912 | 24851257 | 346  | 1.19  | 0.00229  | 0.0136   | ENSMUSG0000010830Gm18207           | processed_p  | 24860946 | 24861471 | upstream     | -9862  | 9689  | shortestDistance |
| chr7 | 24852901 | 24853234 | 334  | 1.89  | 3.17E-05 | 0.000433 | ENSMUSG0000010830Gm18207           | processed_p  | 24860946 | 24861471 | upstream     | -7878  | 7712  | shortestDistance |
| chr7 | 25000048 | 25000623 | 576  | 1.56  | 0.00124  | 0.00845  | ENSMUSG00000004090Atp1a3           | protein_codi | 24978167 | 25005958 | inside       | 5622   | 5335  | shortestDistance |
| chr7 | 25006585 | 25007081 | 497  | 1.62  | 0.00213  | 0.00208  | ENSMUSG00000004090Atp1a3           | protein_codi | 24978167 | 25005958 | upstream     | -875   | 627   | shortestDistance |
| chr7 | 25026506 | 25026802 | 297  | -1.83 | 0.000111 | 0.00121  | ENSMUSG00000000337Grk5             | protein_codi | 25009849 | 25072346 | inside       | 45692  | 16657 | shortestDistance |
| chr7 | 25274579 | 25274877 | 299  | -1.14 | 0.00186  | 0.0116   | ENSMUSG00000000454Ctcf             | protein_codi | 25267704 | 25294159 | inside       | 7024   | 6875  | shortestDistance |
| chr7 | 25372434 | 25372782 | 349  | 5.38  | 1.00E-14 | 4.19E-12 | ENSMUSG00000006365Cnfn             | protein_codi | 25367620 | 25369724 | upstream     | -2884  | 2710  | shortestDistance |
| chr7 | 25379768 |          |      |       |          |          |                                    |              |          |          |              |        |       |                  |

|      |          |          |      |       |          |          |                     |             |              |          |          |              |        |        |                  |
|------|----------|----------|------|-------|----------|----------|---------------------|-------------|--------------|----------|----------|--------------|--------|--------|------------------|
| chr7 | 29319545 | 29319868 | 324  | -1.11 | 0.0055   | 0.0268   | ENSMUSG0000010935   | Gm44632     | antisense_RI | 29316770 | 29319402 | upstream     | -304   | 143    | shortestDistance |
| chr7 | 29339506 | 29393762 | 257  | -1.24 | 0.00516  | 0.0255   | ENSMUSG0000003058   | Sipa1l3     | protein_codi | 29320372 | 29518641 | inside       | 125007 | 73134  | shortestDistance |
| chr7 | 29461535 | 29462507 | 973  | -1.39 | 4.16E-05 | 0.000543 | ENSMUSG0000003058   | Sipa1l3     | protein_codi | 29320372 | 29518641 | inside       | 56620  | 56134  | shortestDistance |
| chr7 | 29471356 | 29471709 | 354  | -2.14 | 8.39E-06 | 0.000142 | ENSMUSG0000003058   | Sipa1l3     | protein_codi | 29320372 | 29518641 | inside       | 47109  | 46932  | shortestDistance |
| chr7 | 29504204 | 29504575 | 372  | -1.18 | 0.00626  | 0.0296   | ENSMUSG0000003058   | Sipa1l3     | protein_codi | 29320372 | 29518641 | inside       | 14251  | 14066  | shortestDistance |
| chr7 | 29784002 | 29784729 | 928  | -1.05 | 0.000535 | 0.00435  | ENSMUSG0000004747   | Zfp30       | protein_codi | 29783998 | 29794702 | overlapStart | 268    | 196    | shortestDistance |
| chr7 | 29818851 | 29819130 | 280  | -0.91 | 0.00438  | 0.0225   | ENSMUSG0000001142   | Zfp790      | protein_codi | 29816114 | 29831005 | inside       | 2876   | 2737   | shortestDistance |
| chr7 | 29853095 | 29853899 | 805  | -0.9  | 0.00265  | 0.0152   | ENSMUSG0000000978   | Gm26554     | antisense_RI | 29853085 | 29858990 | inside       | 412    | 10     | shortestDistance |
| chr7 | 29953459 | 29954449 | 991  | -0.8  | 0.00685  | 0.0318   | ENSMUSG0000006362   | C230062116R | processed_tr | 29953621 | 29965711 | overlapStart | 333    | 162    | shortestDistance |
| chr7 | 30008078 | 30008714 | 637  | 3.24  | 2.06E-11 | 2.44E-09 | ENSMUSG0000007422   | Zfp568      | protein_codi | 29983955 | 30028282 | inside       | 24441  | 19568  | shortestDistance |
| chr7 | 30050869 | 30051602 | 734  | -0.88 | 0.00358  | 0.0192   | ENSMUSG0000000539   | Zfp14       | protein_codi | 30036359 | 30051380 | overlapStart | 144    | 222    | shortestDistance |
| chr7 | 30143346 | 30144281 | 936  | -1.23 | 0.000563 | 0.00453  | ENSMUSG00000010892  | Gm10988     | processed_p  | 30151841 | 30152928 | upstream     | -8027  | 7560   | shortestDistance |
| chr7 | 30176501 | 30176753 | 253  | -1.44 | 0.000782 | 0.00587  | ENSMUSG0000006664   | Gm5113      | protein_codi | 30169875 | 30182324 | inside       | 6752   | 5571   | shortestDistance |
| chr7 | 30333489 | 30333841 | 353  | -1.12 | 0.00391  | 0.0206   | ENSMUSG00000007421  | Shaf1       | protein_codi | 30321406 | 30323895 | upstream     | -9770  | 9594   | shortestDistance |
| chr7 | 30794926 | 30795292 | 367  | 1.25  | 0.0037   | 0.0197   | ENSMUSG00000007419  | Krtadp      | protein_codi | 30787896 | 30791097 | downstream   | 7213   | 3829   | shortestDistance |
| chr7 | 30942319 | 30942886 | 568  | 2.25  | 7.22E-06 | 0.000126 | ENSMUSG00000005044  | Hamp        | protein_codi | 30942368 | 30944032 | overlapEnd   | 1430   | 49     | shortestDistance |
| chr7 | 30953394 | 30953748 | 355  | 2.48  | 4.87E-08 | 1.80E-06 | ENSMUSG00000005823  | Usf2        | protein_codi | 30945248 | 30956803 | inside       | 3232   | 3055   | shortestDistance |
| chr7 | 31007854 | 31008066 | 753  | 1.06  | 0.00109  | 0.00764  | ENSMUSG00000004682  | Fam187b     | protein_codi | 30973790 | 30989726 | downstream   | 34440  | 18128  | shortestDistance |
| chr7 | 31031764 | 31032157 | 394  | 0.91  | 0.0114   | 0.047    | ENSMUSG0000000968   | Fxyd5       | protein_codi | 31032722 | 31042481 | downstream   | 10521  | 565    | shortestDistance |
| chr7 | 31036902 | 31037332 | 431  | 1.3   | 0.000395 | 0.00343  | ENSMUSG0000000968   | Fxyd5       | protein_codi | 31032722 | 31042481 | inside       | 5364   | 4180   | shortestDistance |
| chr7 | 31182923 | 31183197 | 275  | -1.09 | 0.00425  | 0.022    | ENSMUSG00000009593  | Gm9569      | processed_p  | 31182037 | 31182823 | downstream   | 1023   | 100    | shortestDistance |
| chr7 | 31195339 | 31195924 | 586  | -1.07 | 0.00213  | 0.0129   | ENSMUSG0000010411   | Gm37292     | TEC          | 31208357 | 31209114 | upstream     | -12725 | 12433  | shortestDistance |
| chr7 | 34265828 | 34266421 | 594  | -0.86 | 0.0107   | 0.0447   | ENSMUSG0000000657   | A931406P16  | protein_codi | 34236707 | 34313551 | inside       | 47427  | 29121  | shortestDistance |
| chr7 | 34398862 | 34399174 | 313  | -1.81 | 2.17E-05 | 0.000315 | ENSMUSG00000008618  | Gm12764     | antisense_RI | 34388665 | 34394779 | downstream   | 10353  | 4083   | shortestDistance |
| chr7 | 34629734 | 34631213 | 1480 | -1.13 | 0.000904 | 0.00658  | ENSMUSG00000010872  | Gm44837     | lincRNA      | 34636996 | 34637712 | downstream   | 7238   | 5783   | shortestDistance |
| chr7 | 34654666 | 34655929 | 1264 | -1.02 | 0.00139  | 0.00927  | ENSMUSG0000000349   | Kctd15      | protein_codi | 34639014 | 34656732 | inside       | 1434   | 803    | shortestDistance |
| chr7 | 34676173 | 34676485 | 313  | -0.94 | 0.00552  | 0.0269   | ENSMUSG00000006040  | Chst8       | protein_codi | 34674468 | 34812711 | inside       | 136382 | 1705   | shortestDistance |
| chr7 | 35041329 | 35041695 | 367  | 3.7   | 6.35E-12 | 8.94E-10 | ENSMUSG00000006393  | Pepd        | protein_codi | 34912379 | 35044708 | inside       | 129133 | 3013   | shortestDistance |
| chr7 | 35084591 | 35084877 | 287  | -1.23 | 0.000766 | 0.00578  | ENSMUSG0000000396   | Gm35611     | lincRNA      | 35086836 | 35090842 | upstream     | -2102  | 1959   | shortestDistance |
| chr7 | 35157501 | 35157861 | 361  | 1.25  | 0.000722 | 0.00552  | ENSMUSG00000010857  | Gm35665     | lincRNA      | 35135046 | 35141449 | upstream     | -16232 | 16052  | shortestDistance |
| chr7 | 35185871 | 35186160 | 290  | -1.83 | 1.19E-05 | 0.000192 | ENSMUSG00000003049  | Slc7a10     | protein_codi | 35186385 | 35201114 | upstream     | -369   | 225    | shortestDistance |
| chr7 | 35269372 | 35270084 | 713  | -0.98 | 0.00196  | 0.0121   | ENSMUSG00000006380  | Gpacth1     | protein_codi | 35276536 | 35318440 | downstream   | 48712  | 6452   | shortestDistance |
| chr7 | 35609115 | 35609647 | 533  | 2.53  | 2.46E-10 | 1.97E-08 | ENSMUSG00000003486  | Ankrd27     | protein_codi | 35586244 | 35639226 | inside       | 23137  | 22871  | shortestDistance |
| chr7 | 35710252 | 35710822 | 571  | -1.03 | 0.00194  | 0.012    | ENSMUSG00000004367  | Dpy193      | protein_codi | 35685165 | 35754454 | inside       | 43917  | 25087  | shortestDistance |
| chr7 | 35729561 | 35730029 | 469  | -1.1  | 0.00195  | 0.0121   | ENSMUSG00000004367  | Dpy193      | protein_codi | 35685165 | 35754454 | inside       | 24659  | 24425  | shortestDistance |
| chr7 | 35836871 | 35837241 | 371  | -0.96 | 0.0069   | 0.032    | ENSMUSG00000004491  | E13304102R  | antisense_RI | 35802592 | 35838074 | inside       | 34464  | 833    | shortestDistance |
| chr7 | 35919625 | 35920723 | 799  | -1.08 | 0.00155  | 0.0101   | ENSMUSG00000010038  | Gm28514     | lincRNA      | 35838260 | 35839570 | downstream   | 82064  | 80355  | shortestDistance |
| chr7 | 36151163 | 36151904 | 742  | -1.72 | 1.85E-05 | 0.000277 | ENSMUSG00000006654  | Rpl17-ps9   | processed_p  | 36118274 | 36118828 | downstream   | 33260  | 32335  | shortestDistance |
| chr7 | 36197486 | 36197948 | 463  | -1.19 | 0.00217  | 0.0131   | ENSMUSG00000009801  | Gm9211      | processed_p  | 36234292 | 36235266 | upstream     | -36575 | 36344  | shortestDistance |
| chr7 | 36601702 | 36602121 | 420  | -1.26 | 0.000534 | 0.00435  | ENSMUSG00000010196  | Gm29129     | lincRNA      | 36568743 | 36573095 | downstream   | 33169  | 28607  | shortestDistance |
| chr7 | 36679687 | 36680082 | 396  | -1.95 | 4.77E-08 | 1.77E-06 | ENSMUSG00000010433  | Gm38285     | TEC          | 36695438 | 36696359 | upstream     | -15554 | 15356  | shortestDistance |
| chr7 | 36690473 | 36690956 | 484  | -1    | 0.00236  | 0.014    | ENSMUSG00000010433  | Gm38285     | TEC          | 36695438 | 36696359 | upstream     | -4724  | 4482   | shortestDistance |
| chr7 | 36695918 | 36696233 | 316  | -0.94 | 0.00769  | 0.0347   | ENSMUSG00000010433  | Gm38285     | TEC          | 36695438 | 36696359 | inside       | 638    | 126    | shortestDistance |
| chr7 | 36706545 | 36707238 | 694  | -1.19 | 0.000399 | 0.00346  | ENSMUSG00000002121  | Tsh3        | protein_codi | 36698118 | 36773553 | inside       | 8774   | 8427   | shortestDistance |
| chr7 | 36709337 | 36709619 | 283  | -1.13 | 0.00118  | 0.00811  | ENSMUSG00000002121  | Tsh3        | protein_codi | 36698118 | 36773553 | inside       | 11360  | 11219  | shortestDistance |
| chr7 | 36745331 | 36745734 | 404  | -1.95 | 1.08E-05 | 0.000176 | ENSMUSG00000002121  | Tsh3        | protein_codi | 36698118 | 36773553 | inside       | 47414  | 27819  | shortestDistance |
| chr7 | 37437775 | 37438348 | 574  | 1.74  | 0.000258 | 0.00243  | ENSMUSG00000010879  | Gm44806     | TEC          | 37465120 | 37467422 | downstream   | 29360  | 26772  | shortestDistance |
| chr7 | 37563037 | 37563652 | 616  | -1.22 | 0.000418 | 0.00358  | ENSMUSG00000004345  | Zfp536      | protein_codi | 37472135 | 37773641 | inside       | 210297 | 90902  | shortestDistance |
| chr7 | 37594283 | 37594863 | 581  | 3.82  | 9.77E-15 | 4.11E-12 | ENSMUSG00000004345  | Zfp536      | protein_codi | 37472135 | 37773641 | inside       | 179068 | 122148 | shortestDistance |
| chr7 | 37639564 | 37640344 | 781  | -1.21 | 0.000235 | 0.00225  | ENSMUSG00000004345  | Zfp536      | protein_codi | 37472135 | 37773641 | inside       | 133687 | 133297 | shortestDistance |
| chr7 | 37640822 | 37641434 | 613  | -1.28 | 0.00146  | 0.00962  | ENSMUSG00000004345  | Zfp536      | protein_codi | 37472135 | 37773641 | inside       | 132513 | 132207 | shortestDistance |
| chr7 | 37770184 | 37770841 | 658  | -1.29 | 0.000141 | 0.00148  | ENSMUSG00000004345  | Zfp536      | protein_codi | 37472135 | 37773641 | inside       | 3129   | 2800   | shortestDistance |
| chr7 | 37931592 | 37932357 | 766  | 3.96  | 9.45E-15 | 4.01E-12 | ENSMUSG00000003042  | Urr1        | protein_codi | 37959992 | 38023551 | downstream   | 91577  | 27635  | shortestDistance |
| chr7 | 37970265 | 37970776 | 512  | -1.05 | 0.0056   | 0.0272   | ENSMUSG00000003042  | Urr1        | protein_codi | 37959992 | 38023551 | inside       | 53031  | 10273  | shortestDistance |
| chr7 | 37971202 | 37971633 | 432  | -1.36 | 0.00026  | 0.00244  | ENSMUSG00000003042  | Urr1        | protein_codi | 37959992 | 38023551 | inside       | 52133  | 11210  | shortestDistance |
| chr7 | 38131258 | 38131604 | 347  | -0.9  | 0.00913  | 0.0396   | ENSMUSG0000000026   | Cnc1        | protein_codi | 38097984 | 38107534 | upstream     | -23897 | 23724  | shortestDistance |
| chr7 | 38174260 | 38174761 | 502  | -1.37 | 8.43E-05 | 0.000966 | ENSMUSG000000008923 | Gm22203     | snRNA        | 38176614 | 38176671 | downstream   | 2161   | 1853   | shortestDistance |
| chr7 | 39487180 | 39487881 | 702  | -1.2  | 0.000525 | 0.00429  | ENSMUSG00000010049  | Gm28455     | unprocessed  | 39489438 | 39498801 | upstream     | -1908  | 1557   | shortestDistance |
| chr7 | 39517494 | 39518202 | 709  | -0.82 | 0.00575  | 0.0277   | ENSMUSG00000006895  | Zfp619      | protein_codi | 39517766 | 39540420 | overlapStart | 82     | 272    | shortestDistance |
| chr7 | 39552063 | 39553000 | 938  | -0.73 | 0.0119   | 0.0484   | ENSMUSG00000010862  | Gm37494     | lincRNA      | 39544402 | 39580589 | inside       | 8130   | 7661   | shortestDistance |
| chr7 | 39588202 | 39589284 | 1083 | -1    | 0.00205  | 0.0126   | ENSMUSG00000007496  | Gm2058      | processed_p  | 39589431 | 39589717 | overlapStart | -188   | 353    | shortestDistance |
| chr7 | 39596469 | 39596766 | 298  | -1.26 | 0.00159  | 0.0103   | ENSMUSG00000009698  | Gm26526     | lincRNA      | 39588518 | 39591679 | upstream     | -4939  | 4790   | shortestDistance |
| chr7 | 39615075 | 39615656 | 582  | -1.58 | 9.04E-06 | 0.000152 | ENSMUSG00000007023  | Gm26327     | snRNA        | 39630392 | 39630502 | upstream     | -15026 | 14736  | shortestDistance |
| chr7 | 39642407 | 39642753 | 347  | -1.12 | 0.00138  | 0.0092   | ENSMUSG00000007023  | Gm26327     | snRNA        | 39630392 | 39630502 | downstream   | 12188  | 11905  | shortestDistance |
| chr7 | 39716426 | 39716626 | 201  | -1.74 | 0.000426 | 0.00364  | ENSMUSG00000010196  | Gm9230      | processed_p  | 39739998 | 39740529 | downstream   | 24003  | 23372  | shortestDistance |
| chr7 | 41392911 | 41394011 | 1101 | -0.91 | 0.00143  | 0.00943  | ENSMUSG00000005638  | A987944     | protein_codi | 41372923 | 41393379 | overlapStart | -82    | 468    | shortestDistance |
| chr7 | 41499021 | 41500067 | 1047 | -0.93 | 0.00151  | 0.00985  | ENSMUSG00000007416  | AW146154    | protein_codi | 41478874 | 41499890 | overlapStart | 346    | 177    | shortestDistance |
| chr7 | 41500170 | 41500828 | 659  | -0.8  | 0.00745  | 0.0339   | ENSMUSG00000007416  | AW146154    | protein_codi | 41478874 | 41499890 | upstream     | -609   | 280    | shortestDistance |
| chr7 | 41598974 | 41599983 | 1010 | -0.75 | 0.0103   | 0.0434   | ENSMUSG00000009147  | 2610021A01  | protein_codi | 41599230 | 41628533 | overlapStart | 248    | 256    | shortestDistance |
| chr7 | 41632601 | 41634036 | 1436 | -0.87 | 0.00239  | 0.0141   | ENSMUSG00000007416  | Zfp788      | protein_codi | 41633203 | 41651530 | overlapStart | 115    | 602    | shortestDistance |
| chr7 | 42450453 | 42451006 | 554  | -1.49 | 1.89E-05 | 0.000281 |                     |             |              |          |          |              |        |        |                  |

|      |          |           |      |       |          |          |                   |            |               |          |          |              |        |        |                  |
|------|----------|-----------|------|-------|----------|----------|-------------------|------------|---------------|----------|----------|--------------|--------|--------|------------------|
| chr7 | 46587393 | 46587905  | 513  | -1.05 | 0.00487  | 0.0244   | ENSMUSG0000003083 | Sergef     | protein_codi  | 46443154 | 46639807 | inside       | 52158  | 51902  | shortestDistance |
| chr7 | 46745776 | 46746183  | 408  | 4.98  | 2.10E-15 | 1.13E-12 | ENSMUSG0000007411 | Saa1       | protein_codi  | 46740497 | 46742980 | upstream     | -3000  | 2796   | shortestDistance |
| chr7 | 46895535 | 46895852  | 318  | 1.87  | 6.66E-05 | 0.000801 | ENSMUSG000000140C | Tsg101     | protein_codi  | 46888949 | 46919969 | inside       | 24275  | 6586   | shortestDistance |
| chr7 | 46928126 | 46928814  | 689  | 2.17  | 1.11E-06 | 2.56E-05 | ENSMUSG0000010923 | Gm45737    | TEC           | 46927813 | 46929424 | inside       | 954    | 313    | shortestDistance |
| chr7 | 46985641 | 46986411  | 771  | 1.19  | 0.00149  | 0.00975  | ENSMUSG0000005650 | Gm9999     | protein_codi  | 46983580 | 46987803 | inside       | 2446   | 1392   | shortestDistance |
| chr7 | 47031307 | 47031791  | 485  | 1.94  | 1.95E-06 | 4.12E-05 | ENSMUSG0000010963 | Gm45474    | lincRNA       | 47049889 | 47050296 | downstream   | 18747  | 18098  | shortestDistance |
| chr7 | 47127166 | 47127538  | 373  | -1.62 | 7.19E-05 | 0.000851 | ENSMUSG0000003085 | Ptpn5      | protein_codi  | 47077795 | 47133684 | inside       | 6332   | 6146   | shortestDistance |
| chr7 | 47131903 | 47133092  | 1190 | -0.94 | 0.00304  | 0.017    | ENSMUSG0000003085 | Ptpn5      | protein_codi  | 47077795 | 47133684 | inside       | 1186   | 592    | shortestDistance |
| chr7 | 47195354 | 47195621  | 268  | -1.3  | 0.00188  | 0.0117   | ENSMUSG0000005232 | Mrgpra6    | protein_codi  | 47185707 | 47204920 | inside       | 9432   | 9299   | shortestDistance |
| chr7 | 47376016 | 47376280  | 265  | -1.16 | 0.00852  | 0.0376   | ENSMUSG0000010047 | Gm29479    | unprocessed_p | 47390616 | 47391070 | downstream   | 14922  | 14336  | shortestDistance |
| chr7 | 47491112 | 47491674  | 563  | 1.95  | 5.60E-06 | 0.000101 | ENSMUSG0000009671 | Mrgpra2b   | protein_codi  | 47463806 | 47528862 | inside       | 37469  | 27306  | shortestDistance |
| chr7 | 47986753 | 47987184  | 432  | -1.24 | 0.000259 | 0.00244  | ENSMUSG0000006717 | Mrgpra4    | protein_codi  | 47980837 | 47982095 | upstream     | -4873  | 37469  | shortestDistance |
| chr7 | 48123903 | 48124129  | 227  | -1.08 | 0.00909  | 0.0395   | ENSMUSG0000010135 | Gm28665    | processed_p   | 48116772 | 48117441 | upstream     | -6575  | 6462   | shortestDistance |
| chr7 | 48124279 | 48124564  | 286  | -1.13 | 0.00462  | 0.0234   | ENSMUSG0000010135 | Gm28665    | processed_p   | 48116772 | 48117441 | upstream     | -6981  | 6838   | shortestDistance |
| chr7 | 48131779 | 48132569  | 791  | -1.08 | 0.000962 | 0.00692  | ENSMUSG0000010135 | Gm28665    | processed_p   | 48116772 | 48117441 | upstream     | -14733 | 14338  | shortestDistance |
| chr7 | 48137156 | 48138170  | 1015 | -1.11 | 0.000363 | 0.0032   | ENSMUSG0000010135 | Gm28665    | processed_p   | 48116772 | 48117441 | upstream     | -20222 | 19715  | shortestDistance |
| chr7 | 48138400 | 48138785  | 386  | -0.88 | 0.00364  | 0.0195   | ENSMUSG0000010135 | Gm28665    | processed_p   | 48116772 | 48117441 | upstream     | -21151 | 20959  | shortestDistance |
| chr7 | 48836678 | 48837347  | 470  | -0.96 | 0.00612  | 0.0291   | ENSMUSG0000003047 | Csrp3      | protein_codi  | 48830398 | 48848033 | inside       | 10921  | 6480   | shortestDistance |
| chr7 | 48958863 | 48959242  | 380  | -1.95 | 2.80E-07 | 8.01E-06 | ENSMUSG0000005251 | Nav2       | protein_codi  | 48908716 | 49610090 | inside       | 50336  | 50147  | shortestDistance |
| chr7 | 48959381 | 48959770  | 390  | -1.16 | 0.00348  | 0.0188   | ENSMUSG0000005251 | Nav2       | protein_codi  | 48908716 | 49610090 | inside       | 50860  | 50665  | shortestDistance |
| chr7 | 49012085 | 49012369  | 285  | -1.49 | 0.00156  | 0.0101   | ENSMUSG0000005251 | Nav2       | protein_codi  | 48908716 | 49610090 | inside       | 103511 | 103369 | shortestDistance |
| chr7 | 49017714 | 49018156  | 443  | -1.17 | 0.0055   | 0.0269   | ENSMUSG0000005251 | Nav2       | protein_codi  | 48908716 | 49610090 | inside       | 109219 | 108998 | shortestDistance |
| chr7 | 49152458 | 49153170  | 713  | -1.13 | 0.00117  | 0.00809  | ENSMUSG0000010895 | 9130015G15 | antisense_RI  | 49122334 | 49159819 | inside       | 7005   | 6649   | shortestDistance |
| chr7 | 49158495 | 49159282  | 788  | -1.54 | 1.88E-05 | 0.000281 | ENSMUSG0000010895 | 9130015G15 | antisense_RI  | 49122334 | 49159819 | inside       | 931    | 537    | shortestDistance |
| chr7 | 49202687 | 49203430  | 744  | -1.28 | 0.000505 | 0.00416  | ENSMUSG0000005251 | Nav2       | protein_codi  | 48908716 | 49610090 | inside       | 294342 | 293971 | shortestDistance |
| chr7 | 49272967 | 49273214  | 248  | -1.15 | 0.0118   | 0.0482   | ENSMUSG0000005251 | Nav2       | protein_codi  | 48908716 | 49610090 | inside       | 364374 | 336876 | shortestDistance |
| chr7 | 49297051 | 49297737  | 677  | -1.63 | 6.65E-06 | 0.000117 | ENSMUSG0000005251 | Nav2       | protein_codi  | 48908716 | 49610090 | inside       | 388683 | 312353 | shortestDistance |
| chr7 | 49297806 | 49298074  | 269  | -1.37 | 0.000192 | 0.00191  | ENSMUSG0000005251 | Nav2       | protein_codi  | 48908716 | 49610090 | inside       | 389224 | 312016 | shortestDistance |
| chr7 | 49303437 | 49304654  | 1218 | -1.64 | 8.64E-07 | 2.08E-05 | ENSMUSG0000005251 | Nav2       | protein_codi  | 48908716 | 49610090 | inside       | 395330 | 305436 | shortestDistance |
| chr7 | 49320952 | 49321617  | 666  | -1.48 | 0.00949  | 0.0408   | ENSMUSG0000005251 | Nav2       | protein_codi  | 48908716 | 49610090 | inside       | 412568 | 288473 | shortestDistance |
| chr7 | 49342877 | 49343791  | 915  | -1.39 | 1.33E-05 | 0.000209 | ENSMUSG0000005251 | Nav2       | protein_codi  | 48908716 | 49610090 | inside       | 434618 | 266299 | shortestDistance |
| chr7 | 49348802 | 49349165  | 364  | -1.73 | 6.72E-05 | 0.000807 | ENSMUSG0000010905 | Gm44913    | TEC           | 49346094 | 49349083 | overlapEnd   | 2890   | 82     | shortestDistance |
| chr7 | 49348212 | 493483271 | 460  | -1.24 | 0.00352  | 0.019    | ENSMUSG0000005251 | Nav2       | protein_codi  | 48908716 | 49610090 | inside       | 474326 | 226819 | shortestDistance |
| chr7 | 49396154 | 49396753  | 600  | 1.38  | 0.000247 | 0.00234  | ENSMUSG0000005251 | Nav2       | protein_codi  | 48908716 | 49610090 | inside       | 487738 | 213337 | shortestDistance |
| chr7 | 49397418 | 49398174  | 757  | 1.12  | 0.000786 | 0.00589  | ENSMUSG0000005251 | Nav2       | protein_codi  | 48908716 | 49610090 | inside       | 489080 | 211916 | shortestDistance |
| chr7 | 49476604 | 49477046  | 443  | -1.01 | 0.0114   | 0.0469   | ENSMUSG0000005251 | Nav2       | protein_codi  | 48908716 | 49610090 | inside       | 568109 | 133044 | shortestDistance |
| chr7 | 49487348 | 49487757  | 410  | -2.3  | 8.83E-09 | 4.19E-07 | ENSMUSG0000005251 | Nav2       | protein_codi  | 48908716 | 49610090 | inside       | 578836 | 122333 | shortestDistance |
| chr7 | 49514704 | 49515458  | 755  | -1.04 | 0.0056   | 0.0272   | ENSMUSG0000005251 | Nav2       | protein_codi  | 48908716 | 49610090 | inside       | 606365 | 94632  | shortestDistance |
| chr7 | 49521776 | 49523009  | 1234 | -0.82 | 0.00975  | 0.0416   | ENSMUSG0000005251 | Nav2       | protein_codi  | 48908716 | 49610090 | inside       | 613676 | 87081  | shortestDistance |
| chr7 | 49544590 | 49545423  | 834  | -1.94 | 1.15E-08 | 5.30E-07 | ENSMUSG0000005251 | Nav2       | protein_codi  | 48908716 | 49610090 | inside       | 636290 | 64667  | shortestDistance |
| chr7 | 49551145 | 49551439  | 295  | -1.03 | 0.0119   | 0.0484   | ENSMUSG0000005251 | Nav2       | protein_codi  | 48908716 | 49610090 | inside       | 642576 | 58651  | shortestDistance |
| chr7 | 49633244 | 49634003  | 760  | -0.93 | 0.0026   | 0.0151   | ENSMUSG0000003050 | Dxb1       | protein_codi  | 49631499 | 49636849 | inside       | 3225   | 1745   | shortestDistance |
| chr7 | 49662062 | 49662271  | 210  | -1.53 | 0.00957  | 0.0411   | ENSMUSG0000003050 | Dxb1       | protein_codi  | 49631499 | 49636849 | upstream     | -25317 | 25213  | shortestDistance |
| chr7 | 49676969 | 49677484  | 516  | -1.4  | 0.000257 | 0.00242  | ENSMUSG0000003050 | Dxb1       | protein_codi  | 49631499 | 49636849 | upstream     | -40377 | 40120  | shortestDistance |
| chr7 | 49741500 | 49741897  | 398  | -1.2  | 0.000755 | 0.00571  | ENSMUSG0000003974 | Httatp2    | protein_codi  | 49759115 | 49773975 | upstream     | -17417 | 17218  | shortestDistance |
| chr7 | 49764046 | 49764555  | 510  | -1.19 | 0.000867 | 0.00637  | ENSMUSG0000003974 | Httatp2    | protein_codi  | 49759115 | 49773975 | inside       | 5185   | 4931   | shortestDistance |
| chr7 | 49922839 | 49923340  | 502  | -1.25 | 0.000117 | 0.00127  | ENSMUSG0000003974 | Slc6a5     | protein_codi  | 49910146 | 49963856 | inside       | 12944  | 12693  | shortestDistance |
| chr7 | 49923434 | 49923798  | 365  | -0.78 | 0.00875  | 0.0383   | ENSMUSG0000003974 | Slc6a5     | protein_codi  | 49910146 | 49963856 | inside       | 13470  | 13288  | shortestDistance |
| chr7 | 51434933 | 51435204  | 272  | -1.35 | 0.0103   | 0.00732  | ENSMUSG0000010905 | Gm9354     | processed_p   | 51458060 | 51458527 | upstream     | -22992 | 22856  | shortestDistance |
| chr7 | 51892550 | 51893004  | 455  | -1.62 | 0.000444 | 0.00376  | ENSMUSG0000003049 | Gas2       | protein_codi  | 51862015 | 51994975 | inside       | 30762  | 30535  | shortestDistance |
| chr7 | 51913664 | 51914032  | 369  | -1.29 | 0.000915 | 0.00664  | ENSMUSG0000003049 | Gas2       | protein_codi  | 51862015 | 51994975 | inside       | 51833  | 51649  | shortestDistance |
| chr7 | 51955585 | 51956122  | 538  | -1.58 | 0.000849 | 0.00627  | ENSMUSG0000003049 | Gas2       | protein_codi  | 51862015 | 51994975 | inside       | 93839  | 38853  | shortestDistance |
| chr7 | 51979315 | 51979642  | 328  | -1.03 | 0.00391  | 0.0206   | ENSMUSG0000003049 | Gas2       | protein_codi  | 51862015 | 51994975 | inside       | 117463 | 15333  | shortestDistance |
| chr7 | 52022033 | 52022381  | 349  | 1.81  | 0.00012  | 0.00129  | ENSMUSG0000010952 | Gm9357     | processed_p   | 52022237 | 52029158 | overlapEnd   | 6951   | 144    | shortestDistance |
| chr7 | 52391873 | 52392151  | 279  | -1.24 | 0.00342  | 0.0186   | ENSMUSG0000010959 | Gm20074    | processed_p   | 52411453 | 52411936 | upstream     | -19441 | 19302  | shortestDistance |
| chr7 | 54835185 | 54836588  | 1404 | -1.44 | 0.000387 | 0.00338  | ENSMUSG0000006329 | Luzp2      | protein_codi  | 54835498 | 55268885 | overlapStart | 388    | 313    | shortestDistance |
| chr7 | 54845892 | 54846239  | 348  | -1.47 | 0.00279  | 0.0159   | ENSMUSG0000006329 | Luzp2      | protein_codi  | 54835498 | 55268885 | inside       | 10568  | 10394  | shortestDistance |
| chr7 | 54878682 | 54879660  | 979  | -1.05 | 0.00799  | 0.0358   | ENSMUSG0000006329 | Luzp2      | protein_codi  | 54835498 | 55268885 | inside       | 43673  | 43184  | shortestDistance |
| chr7 | 54898561 | 54898911  | 351  | -2.81 | 2.99E-11 | 3.33E-09 | ENSMUSG0000006329 | Luzp2      | protein_codi  | 54835498 | 55268885 | inside       | 63238  | 63063  | shortestDistance |
| chr7 | 54935111 | 54935449  | 339  | -2.05 | 8.63E-06 | 0.000146 | ENSMUSG0000006329 | Luzp2      | protein_codi  | 54835498 | 55268885 | inside       | 99782  | 99613  | shortestDistance |
| chr7 | 55009323 | 55009914  | 592  | -1.22 | 0.00102  | 0.00724  | ENSMUSG0000006329 | Luzp2      | protein_codi  | 54835498 | 55268885 | inside       | 174120 | 173825 | shortestDistance |
| chr7 | 55133912 | 55134191  | 280  | -1.65 | 7.41E-05 | 0.000871 | ENSMUSG0000006329 | Luzp2      | protein_codi  | 54835498 | 55268885 | inside       | 298554 | 134694 | shortestDistance |
| chr7 | 55188954 | 55189286  | 333  | -1.24 | 0.000698 | 0.00537  | ENSMUSG0000006329 | Luzp2      | protein_codi  | 54835498 | 55268885 | inside       | 353622 | 79599  | shortestDistance |
| chr7 | 55190682 | 55191004  | 323  | -2.45 | 3.87E-11 | 4.14E-09 | ENSMUSG0000006329 | Luzp2      | protein_codi  | 54835498 | 55268885 | inside       | 355345 | 77881  | shortestDistance |
| chr7 | 55710776 | 55711400  | 625  | -1.4  | 4.15E-05 | 0.000542 | ENSMUSG0000008864 | Gm26482    | snRNA         | 55702154 | 55702215 | downstream   | 8934   | 8561   | shortestDistance |
| chr7 | 55737215 | 55737931  | 717  | -1.15 | 0.000507 | 0.00417  | ENSMUSG0000005150 | Siglech    | protein_codi  | 55768178 | 55778925 | upstream     | -30605 | 30247  | shortestDistance |
| chr7 | 55793688 | 55794487  | 800  | -0.8  | 0.00084  | 0.0372   | ENSMUSG0000003379 | Tubgp5     | protein_codi  | 55794154 | 55831677 | overlapStart | -66    | 333    | shortestDistance |
| chr7 | 55852773 | 55853609  | 837  | -0.88 | 0.0008   | 0.0358   | ENSMUSG0000003044 | Cyfp1      | protein_codi  | 55841745 | 55932602 | inside       | 11446  | 11028  | shortestDistance |
| chr7 | 55918309 | 55918684  | 376  | 2.37  | 1.01E-06 | 2.37E-05 | ENSMUSG0000003044 | Cyfp1      | protein_codi  | 55841745 | 55932602 | inside       | 76751  | 13918  | shortestDistance |
| chr7 | 56018498 | 56018863  | 366  | -1.51 | 5.73E-06 | 0.000103 | ENSMUSG0000004703 | Nipa1      | protein_codi  | 55977567 | 56019954 | inside       | 1274   | 1091   | shortestDistance |
| chr7 | 56018925 | 56019962  | 1038 | -0.9  | 0.0006   | 0.0287   | ENSMUSG0000004703 | Nipa1      | protein_codi  | 55977567 | 5601     |              |        |        |                  |

|      |          |          |      |       |          |          |                    |             |              |          |          |              |        |        |                  |
|------|----------|----------|------|-------|----------|----------|--------------------|-------------|--------------|----------|----------|--------------|--------|--------|------------------|
| chr7 | 63876639 | 63876956 | 318  | 2.28  | 1.61E-06 | 3.50E-05 | ENSMUSG00000005204 | Kif13       | protein_codi | 63886351 | 63938915 | downstream   | 62117  | 9395   | shortestDistance |
| chr7 | 63903622 | 63904118 | 497  | 2.51  | 1.14E-07 | 3.73E-06 | ENSMUSG00000005204 | Kif13       | protein_codi | 63886351 | 63938915 | inside       | 35045  | 17271  | shortestDistance |
| chr7 | 63965097 | 63965765 | 669  | -0.92 | 0.0123   | 0.0497   | ENSMUSG0000010831  | Gm45052     | lincRNA      | 63962240 | 63967744 | inside       | 3191   | 1979   | shortestDistance |
| chr7 | 63984175 | 63984714 | 540  | -0.96 | 0.00264  | 0.0152   | ENSMUSG0000010831  | Gm45052     | lincRNA      | 63962240 | 63967744 | downstream   | 22204  | 16431  | shortestDistance |
| chr7 | 63986861 | 63987165 | 305  | -1.32 | 0.00195  | 0.0121   | ENSMUSG0000010839  | Gm32633     | lincRNA      | 64001885 | 64020959 | upstream     | -14872 | 14720  | shortestDistance |
| chr7 | 64001462 | 64002117 | 656  | 1.11  | 0.0122   | 0.0492   | ENSMUSG0000010839  | Gm32633     | lincRNA      | 64001885 | 64020959 | overlapStart | -95    | 232    | shortestDistance |
| chr7 | 64011342 | 64012415 | 1074 | 0.95  | 0.00465  | 0.0235   | ENSMUSG0000010839  | Gm32633     | lincRNA      | 64001885 | 64020959 | inside       | 9993   | 8544   | shortestDistance |
| chr7 | 64043464 | 64043462 | 700  | -1.17 | 0.000245 | 0.00233  | ENSMUSG0000010846  | Gm45054     | lincRNA      | 64034246 | 64040826 | upstream     | -2286  | 1937   | shortestDistance |
| chr7 | 64064695 | 64065426 | 732  | -0.95 | 0.00581  | 0.028    | ENSMUSG0000010862  | Gm20670     | lincRNA      | 64057602 | 64062958 | downstream   | 7458   | 1737   | shortestDistance |
| chr7 | 64070912 | 64071285 | 374  | 4.09  | 3.06E-12 | 4.76E-10 | ENSMUSG0000010862  | Gm20670     | lincRNA      | 64057602 | 64062958 | downstream   | 13496  | 7954   | shortestDistance |
| chr7 | 64076950 | 64077348 | 399  | 1.58  | 3.54E-05 | 0.000476 | ENSMUSG0000010862  | Gm20670     | lincRNA      | 64057602 | 64062958 | downstream   | 19547  | 13992  | shortestDistance |
| chr7 | 64122236 | 64122757 | 522  | -0.9  | 0.00563  | 0.0273   | ENSMUSG0000003052  | Trpm1       | protein_codi | 64153835 | 64269775 | upstream     | -31339 | 31078  | shortestDistance |
| chr7 | 64192029 | 64192751 | 723  | -1.43 | 1.71E-05 | 0.000259 | ENSMUSG0000003052  | Trpm1       | protein_codi | 64153835 | 64269775 | inside       | 38555  | 38194  | shortestDistance |
| chr7 | 64249782 | 64250126 | 345  | -1.82 | 1.42E-05 | 0.000221 | ENSMUSG0000009891  | Mir6416     | miRNA        | 64249983 | 64250099 | includeFeatu | 145    | 27     | shortestDistance |
| chr7 | 64792075 | 64792424 | 350  | -1.36 | 0.00419  | 0.0217   | ENSMUSG0000003051  | Fam189a1    | protein_codi | 64756091 | 65156570 | inside       | 364320 | 35984  | shortestDistance |
| chr7 | 64850879 | 64851136 | 258  | -1.33 | 0.00195  | 0.0121   | ENSMUSG0000003051  | Fam189a1    | protein_codi | 64756091 | 65156570 | inside       | 305562 | 94788  | shortestDistance |
| chr7 | 65031274 | 65031554 | 281  | -1.26 | 0.0123   | 0.0496   | ENSMUSG0000003051  | Fam189a1    | protein_codi | 64756091 | 65156570 | inside       | 125156 | 125016 | shortestDistance |
| chr7 | 65410563 | 65411194 | 632  | 1.67  | 6.71E-06 | 0.000118 | ENSMUSG0000003051  | Tjp1        | protein_codi | 65296165 | 65527781 | inside       | 116903 | 114398 | shortestDistance |
| chr7 | 65466737 | 65467070 | 334  | -1.06 | 0.00753  | 0.0342   | ENSMUSG0000003051  | Tjp1        | protein_codi | 65296165 | 65527781 | inside       | 60877  | 60711  | shortestDistance |
| chr7 | 65469636 | 65469921 | 286  | -1.28 | 0.00601  | 0.0287   | ENSMUSG0000003051  | Tjp1        | protein_codi | 65296165 | 65527781 | inside       | 58003  | 57860  | shortestDistance |
| chr7 | 65483853 | 65484366 | 514  | -1.78 | 3.60E-05 | 0.000482 | ENSMUSG0000003051  | Tjp1        | protein_codi | 65296165 | 65527781 | inside       | 43671  | 43415  | shortestDistance |
| chr7 | 65802846 | 65803214 | 369  | 3.29  | 1.21E-11 | 1.55E-09 | ENSMUSG0000010009  | 181000818   | lincRNA      | 65803111 | 65806449 | overlapStart | -81    | 103    | shortestDistance |
| chr7 | 66038851 | 66039499 | 649  | -1.1  | 0.00153  | 0.00997  | ENSMUSG0000003051  | Pcsk6       | protein_codi | 65861734 | 66050386 | inside       | 177441 | 10887  | shortestDistance |
| chr7 | 66043591 | 66045529 | 939  | -1.4  | 0.000111 | 0.00121  | ENSMUSG0000010879  | Gm45213     | protein_codi | 66043602 | 66062271 | overlapStart | 458    | 11     | shortestDistance |
| chr7 | 66118095 | 66118438 | 344  | 0.96  | 0.00995  | 0.0423   | ENSMUSG0000003264  | ChsY1       | protein_codi | 66109515 | 66173798 | inside       | 8751   | 8580   | shortestDistance |
| chr7 | 66134228 | 66134472 | 245  | 2.68  | 1.06E-06 | 2.46E-05 | ENSMUSG0000003264  | ChsY1       | protein_codi | 66109515 | 66173798 | inside       | 24835  | 24713  | shortestDistance |
| chr7 | 66140105 | 66140514 | 410  | 1.52  | 0.000589 | 0.0047   | ENSMUSG0000003264  | ChsY1       | protein_codi | 66109515 | 66173798 | inside       | 30795  | 30590  | shortestDistance |
| chr7 | 66159902 | 66160361 | 460  | 1.9   | 0.000712 | 0.00546  | ENSMUSG0000009763  | Gm26827     | antisense_RI | 66109515 | 66173121 | inside       | 12989  | 12760  | shortestDistance |
| chr7 | 66196598 | 66196904 | 307  | -1.01 | 0.00413  | 0.0215   | ENSMUSG0000010868  | Gm45080     | processed_p  | 66190555 | 66190837 | downstream   | 6196   | 5761   | shortestDistance |
| chr7 | 66212486 | 66213294 | 809  | 1.21  | 0.000547 | 0.00443  | ENSMUSG0000001513  | Lrrk1       | protein_codi | 66226912 | 66388350 | downstream   | 175460 | 13618  | shortestDistance |
| chr7 | 66310632 | 66311066 | 435  | 1.72  | 9.58E-05 | 0.00107  | ENSMUSG0000010911  | Gm44752     | antisense_RI | 66309195 | 66312499 | inside       | 1654   | 1433   | shortestDistance |
| chr7 | 66343064 | 66343546 | 483  | -1.83 | 0.000539 | 0.00437  | ENSMUSG0000001513  | Lrrk1       | protein_codi | 66226912 | 66388350 | inside       | 45045  | 44804  | shortestDistance |
| chr7 | 66427149 | 66428244 | 1096 | -0.91 | 0.00396  | 0.0208   | ENSMUSG0000001513  | Aldh1a3     | protein_codi | 66390890 | 66427517 | overlapStart | -179   | 368    | shortestDistance |
| chr7 | 66438826 | 66439161 | 336  | -1.11 | 0.0066   | 0.0309   | ENSMUSG0000010911  | Gm44753     | lincRNA      | 66441598 | 66444250 | upstream     | -2604  | 2437   | shortestDistance |
| chr7 | 66504587 | 66504820 | 234  | 2.7   | 1.27E-05 | 0.000202 | ENSMUSG0000010911  | Gm44753     | lincRNA      | 66441598 | 66444250 | downstream   | 63106  | 60337  | shortestDistance |
| chr7 | 66619357 | 66619694 | 338  | -1.04 | 0.0124   | 0.05     | ENSMUSG0000010924  | Gm44610     | TEC          | 66615322 | 66619148 | upstream     | -378   | 209    | shortestDistance |
| chr7 | 66699632 | 66699947 | 316  | -2.03 | 2.05E-06 | 4.31E-05 | ENSMUSG0000003051  | Lins1       | protein_codi | 66689889 | 66712756 | inside       | 9901   | 9743   | shortestDistance |
| chr7 | 66803821 | 66804268 | 448  | -1.9  | 2.79E-07 | 8.00E-06 | ENSMUSG0000003051  | Cers3       | protein_codi | 66743504 | 66823691 | inside       | 60540  | 19423  | shortestDistance |
| chr7 | 66912819 | 66913410 | 592  | -0.97 | 0.00721  | 0.033    | ENSMUSG0000005814  | Adams17     | protein_codi | 66839735 | 67153171 | inside       | 73379  | 73084  | shortestDistance |
| chr7 | 66956039 | 66956316 | 278  | -1.34 | 0.00219  | 0.0132   | ENSMUSG0000005814  | Adams17     | protein_codi | 66839735 | 67153171 | inside       | 116443 | 116304 | shortestDistance |
| chr7 | 67419590 | 67419946 | 357  | -1.44 | 0.000637 | 0.005    | ENSMUSG0000010932  | Gm33926     | lincRNA      | 67429073 | 67443933 | downstream   | 24165  | 9127   | shortestDistance |
| chr7 | 67421763 | 67422214 | 452  | -1.04 | 0.00606  | 0.0289   | ENSMUSG0000010932  | Gm33926     | lincRNA      | 67429073 | 67443933 | downstream   | 21945  | 6859   | shortestDistance |
| chr7 | 67435664 | 67436315 | 653  | -1.45 | 0.000384 | 0.00335  | ENSMUSG0000010932  | Gm33926     | lincRNA      | 67429073 | 67443933 | inside       | 7944   | 6590   | shortestDistance |
| chr7 | 67503205 | 67503898 | 694  | -1.14 | 0.00202  | 0.0124   | ENSMUSG0000003055  | Lrrc28      | protein_codi | 67513410 | 67645268 | downstream   | 147176 | 9512   | shortestDistance |
| chr7 | 67532704 | 67533015 | 312  | -1.02 | 0.0096   | 0.0412   | ENSMUSG0000003055  | Lrrc28      | protein_codi | 67513410 | 67645268 | inside       | 112408 | 19294  | shortestDistance |
| chr7 | 67549048 | 67549620 | 573  | -0.94 | 0.0123   | 0.0497   | ENSMUSG0000003055  | Lrrc28      | protein_codi | 67513410 | 67645268 | inside       | 95934  | 35638  | shortestDistance |
| chr7 | 67614534 | 67614789 | 256  | 2.49  | 1.74E-05 | 0.000263 | ENSMUSG0000003055  | Lrrc28      | protein_codi | 67513410 | 67645268 | inside       | 30606  | 30479  | shortestDistance |
| chr7 | 67675427 | 67675733 | 307  | -1.53 | 0.00161  | 0.0104   | ENSMUSG0000003055  | Ttc23       | protein_codi | 67647410 | 67762912 | inside       | 28170  | 28017  | shortestDistance |
| chr7 | 67702115 | 67702510 | 396  | -1.4  | 0.00039  | 0.00339  | ENSMUSG0000003055  | Ttc23       | protein_codi | 67647410 | 67762912 | inside       | 54902  | 54705  | shortestDistance |
| chr7 | 67704237 | 67704609 | 373  | -1.2  | 0.000778 | 0.00585  | ENSMUSG0000003055  | Ttc23       | protein_codi | 67647410 | 67762912 | inside       | 57013  | 56827  | shortestDistance |
| chr7 | 67798412 | 67798845 | 434  | 3.36  | 1.52E-11 | 1.88E-09 | ENSMUSG0000009769  | 4833412C051 | lincRNA      | 67784538 | 67804139 | inside       | 5511   | 5294   | shortestDistance |
| chr7 | 67883100 | 67883402 | 303  | 2.63  | 5.27E-07 | 1.36E-05 | ENSMUSG0000010915  | Gm44666     | processed_p  | 67886195 | 67886585 | downstream   | 3334   | 2793   | shortestDistance |
| chr7 | 67906312 | 67906790 | 479  | 2.71  | 3.10E-08 | 1.24E-06 | ENSMUSG0000010915  | Gm44666     | processed_p  | 67886195 | 67886585 | upstream     | -19966 | 19727  | shortestDistance |
| chr7 | 67930215 | 67930470 | 256  | -1.59 | 0.000605 | 0.0048   | ENSMUSG0000000553  | Igf1r       | protein_codi | 67952827 | 68233668 | upstream     | -22485 | 22357  | shortestDistance |
| chr7 | 68073287 | 68073778 | 492  | -1.41 | 0.00311  | 0.0173   | ENSMUSG0000000553  | Igf1r       | protein_codi | 67952827 | 68233668 | inside       | 120705 | 120460 | shortestDistance |
| chr7 | 68133609 | 68134059 | 451  | 1.81  | 1.93E-05 | 0.000286 | ENSMUSG0000000553  | Igf1r       | protein_codi | 67952827 | 68233668 | inside       | 181007 | 99609  | shortestDistance |
| chr7 | 68163971 | 68164544 | 574  | 0.89  | 0.0119   | 0.0484   | ENSMUSG0000000553  | Igf1r       | protein_codi | 67952827 | 68233668 | inside       | 211431 | 69124  | shortestDistance |
| chr7 | 68193784 | 68194690 | 907  | 2.01  | 9.68E-07 | 2.29E-05 | ENSMUSG0000000553  | Igf1r       | protein_codi | 67952827 | 68233668 | inside       | 241410 | 38978  | shortestDistance |
| chr7 | 68275715 | 68276423 | 709  | -1.03 | 0.00321  | 0.0177   | ENSMUSG0000008662  | Gm16157     | antisense_RI | 68266339 | 68276594 | inside       | 525    | 171    | shortestDistance |
| chr7 | 68298408 | 68298669 | 262  | -1.33 | 0.00481  | 0.0241   | ENSMUSG0000007407  | Fam169b     | protein_codi | 68273839 | 68363092 | inside       | 24699  | 24569  | shortestDistance |
| chr7 | 68667328 | 68668684 | 1357 | 1.34  | 4.06E-05 | 0.000532 | ENSMUSG0000009485  | Gm5334      | processed_p  | 68618838 | 68619557 | downstream   | 49168  | 47771  | shortestDistance |
| chr7 | 68682333 | 68682823 | 491  | 1.5   | 2.57E-05 | 0.000364 | ENSMUSG0000010887  | Gm44692     | lincRNA      | 68719170 | 68726467 | downstream   | 43889  | 36347  | shortestDistance |
| chr7 | 68738729 | 68739415 | 687  | 1.59  | 5.17E-06 | 9.46E-05 | ENSMUSG0000004265  | Arrdc4      | protein_codi | 68736995 | 68749241 | inside       | 10169  | 1734   | shortestDistance |
| chr7 | 68759251 | 68760075 | 825  | 1.73  | 6.44E-05 | 0.00078  | ENSMUSG0000004265  | Arrdc4      | protein_codi | 68736995 | 68749241 | upstream     | -10422 | 10010  | shortestDistance |
| chr7 | 68829880 | 68830215 | 336  | -0.89 | 0.00745  | 0.0339   | ENSMUSG0000010940  | Gm34664     | lincRNA      | 68843099 | 68916016 | downstream   | 85968  | 12884  | shortestDistance |
| chr7 | 68834457 | 68834823 | 367  | -1.22 | 0.00276  | 0.0157   | ENSMUSG0000010940  | Gm34664     | lincRNA      | 68843099 | 68916016 | downstream   | 81376  | 8276   | shortestDistance |
| chr7 | 68917143 | 68917991 | 849  | 1.04  | 0.00306  | 0.0171   | ENSMUSG0000010940  | Gm34664     | lincRNA      | 68843099 | 68916016 | upstream     | -1551  | 1127   | shortestDistance |
| chr7 | 70331590 | 70332320 | 731  | -2.02 | 1.24E-08 | 5.66E-07 | ENSMUSG0000010939  | Gm29683     | lincRNA      | 70178868 | 70337852 | inside       | 5897   | 5532   | shortestDistance |
| chr7 | 70334931 | 70335257 | 327  | -0.86 | 0.00929  | 0.0401   | ENSMUSG0000010909  | Gm29683     | lincRNA      | 70178868 | 70337852 | inside       | 2758   | 2595   | shortestDistance |
| chr7 | 70345924 | 70346641 | 716  | -1.44 | 0.000574 | 0.00461  | ENSMUSG0000010936  | Gm44946     | lincRNA      | 70345239 | 70345810 | upstream     | -474   | 116    | shortestDistance |
| chr7 | 70358821 | 70359362 | 542  | -1.27 | 0.00184  | 0.0115   |                    |             |              |          |          |              |        |        |                  |

|      |          |          |      |       |          |          |                    |             |               |          |          |              |        |        |                  |
|------|----------|----------|------|-------|----------|----------|--------------------|-------------|---------------|----------|----------|--------------|--------|--------|------------------|
| chr7 | 75872299 | 75872939 | 641  | 1.93  | 4.67E-07 | 1.24E-05 | ENSMUSG0000005565  | KlHn25      | protein_codi  | 75848310 | 75874131 | inside       | 24309  | 1192   | shortestDistance |
| chr7 | 75899593 | 75900348 | 756  | 1.63  | 1.43E-05 | 0.000222 | ENSMUSG0000005565  | KlHn25      | protein_codi  | 75848310 | 75874131 | downstream   | 51660  | 25462  | shortestDistance |
| chr7 | 75905179 | 75905531 | 353  | 1.63  | 0.000118 | 0.00128  | ENSMUSG0000005565  | KlHn25      | protein_codi  | 75848310 | 75874131 | downstream   | 57045  | 31048  | shortestDistance |
| chr7 | 75910007 | 75910885 | 879  | -1.1  | 0.000517 | 0.00424  | ENSMUSG0000005565  | KlHn25      | protein_codi  | 75848310 | 75874131 | downstream   | 62136  | 35876  | shortestDistance |
| chr7 | 75927525 | 75927896 | 372  | -1.38 | 0.000269 | 0.00251  | ENSMUSG0000005565  | KlHn25      | protein_codi  | 75848310 | 75874131 | downstream   | 79400  | 53394  | shortestDistance |
| chr7 | 76098712 | 76099661 | 950  | -0.89 | 0.00854  | 0.0376   | ENSMUSG0000010846  | Gm45211     | TEC           | 76054094 | 76056743 | downstream   | 45092  | 41969  | shortestDistance |
| chr7 | 76228771 | 76229521 | 751  | -1.05 | 0.00057  | 0.0275   | ENSMUSG0000002575  | Agb1        | protein_codi  | 76229887 | 77124698 | upstream     | -741   | 366    | shortestDistance |
| chr7 | 76353491 | 76353824 | 334  | -0.93 | 0.00904  | 0.0393   | ENSMUSG0000002575  | Agb1        | protein_codi  | 76229887 | 77124698 | inside       | 123771 | 123604 | shortestDistance |
| chr7 | 76411992 | 76412553 | 562  | 0.89  | 0.0109   | 0.0453   | ENSMUSG0000002575  | Agb1        | protein_codi  | 76229887 | 77124698 | inside       | 182385 | 182105 | shortestDistance |
| chr7 | 76941585 | 76941876 | 292  | -1.02 | 0.00309  | 0.0172   | ENSMUSG0000002575  | Agb1        | protein_codi  | 76229887 | 77124698 | inside       | 711843 | 182822 | shortestDistance |
| chr7 | 76971282 | 76971761 | 480  | -1.52 | 3.75E-05 | 0.000499 | ENSMUSG0000002575  | Agb1        | protein_codi  | 76229887 | 77124698 | inside       | 741635 | 152937 | shortestDistance |
| chr7 | 77094766 | 77095677 | 912  | -0.98 | 0.00492  | 0.0246   | ENSMUSG0000002575  | Agb1        | protein_codi  | 76229887 | 77124698 | inside       | 865335 | 29021  | shortestDistance |
| chr7 | 77131910 | 77132402 | 493  | -0.83 | 0.00798  | 0.0358   | ENSMUSG0000002575  | Agb1        | protein_codi  | 76229887 | 77124698 | downstream   | 902269 | 7212   | shortestDistance |
| chr7 | 77132699 | 77133650 | 952  | -0.82 | 0.00606  | 0.0289   | ENSMUSG0000002575  | Agb1        | protein_codi  | 76229887 | 77124698 | downstream   | 903287 | 8001   | shortestDistance |
| chr7 | 77148851 | 77149212 | 362  | 1.22  | 0.00663  | 0.031    | ENSMUSG0000002575  | Agb1        | protein_codi  | 76229887 | 77124698 | downstream   | 919145 | 24153  | shortestDistance |
| chr7 | 77152415 | 77153506 | 1092 | -2.43 | 1.38E-13 | 3.63E-11 | ENSMUSG0000002575  | Agb1        | protein_codi  | 76229887 | 77124698 | downstream   | 923073 | 27717  | shortestDistance |
| chr7 | 77400719 | 77400989 | 271  | -1.76 | 2.46E-05 | 0.000351 | ENSMUSG0000010832  | Gm44608     | TEC           | 77412573 | 77413427 | upstream     | -11719 | 11584  | shortestDistance |
| chr7 | 77441638 | 77441981 | 344  | -1.16 | 0.00136  | 0.00911  | ENSMUSG0000005914  | Ntrk3       | TEC           | 77412573 | 77413427 | downstream   | 29237  | 28211  | shortestDistance |
| chr7 | 77507489 | 77508130 | 642  | -2.21 | 0.000115 | 0.00125  | ENSMUSG0000010832  | Gm44608     | TEC           | 77412573 | 77413427 | downstream   | 95237  | 94062  | shortestDistance |
| chr7 | 77771769 | 77772365 | 597  | -2.84 | 7.93E-08 | 2.73E-06 | ENSMUSG0000004944  | Gm23239     | snRNA         | 77910140 | 77910320 | downstream   | 138253 | 13775  | shortestDistance |
| chr7 | 78568929 | 78569252 | 324  | -1.01 | 0.00534  | 0.0263   | ENSMUSG0000010839  | Gm39038     | sense_intron  | 78560635 | 78575232 | inside       | 6142   | 5980   | shortestDistance |
| chr7 | 78584539 | 78584793 | 255  | -1.12 | 0.00697  | 0.0322   | ENSMUSG0000005914  | Ntrk3       | protein_codi  | 78175959 | 78738012 | inside       | 153346 | 153219 | shortestDistance |
| chr7 | 78596184 | 78598457 | 274  | -2.02 | 8.16E-06 | 0.000139 | ENSMUSG0000005914  | Ntrk3       | protein_codi  | 78175959 | 78738012 | inside       | 139692 | 139555 | shortestDistance |
| chr7 | 78918670 | 78919096 | 427  | -1.31 | 0.00214  | 0.013    | ENSMUSG0000003923  | Isg20       | protein_codi  | 78913424 | 78920396 | inside       | 5459   | 1300   | shortestDistance |
| chr7 | 79167085 | 79167525 | 441  | 2.29  | 2.12E-05 | 0.00031  | ENSMUSG0000003060  | Mfge8       | protein_codi  | 79133768 | 79149060 | upstream     | -18245 | 18025  | shortestDistance |
| chr7 | 79193160 | 79193375 | 216  | 1.96  | 0.000669 | 0.0052   | ENSMUSG0000003060  | Mfge8       | protein_codi  | 79133768 | 79149060 | upstream     | -44208 | 44100  | shortestDistance |
| chr7 | 79210405 | 79210742 | 338  | -1.27 | 0.00307  | 0.0171   | ENSMUSG00000010838 | Gm31510     | bidirectional | 79271688 | 79273035 | downstream   | 62461  | 60946  | shortestDistance |
| chr7 | 79314918 | 79315581 | 664  | 1.04  | 0.0035   | 0.0189   | ENSMUSG0000003920  | Abhd2       | protein_codi  | 79273199 | 79365508 | inside       | 42051  | 41719  | shortestDistance |
| chr7 | 79397564 | 79398067 | 504  | -1.88 | 3.28E-06 | 6.43E-05 | ENSMUSG0000003918  | Fanci       | protein_codi  | 79391929 | 79450264 | inside       | 5887   | 5673   | shortestDistance |
| chr7 | 79602094 | 79602498 | 405  | 3.46  | 3.99E-11 | 4.24E-09 | ENSMUSG0000010831  | Gm45170     | TEC           | 79602006 | 79603676 | inside       | 1380   | 88     | shortestDistance |
| chr7 | 79744615 | 79745040 | 426  | 0.89  | 0.0124   | 0.05     | ENSMUSG0000003909  | Wdr93       | protein_codi  | 79743163 | 79785950 | inside       | 1665   | 1452   | shortestDistance |
| chr7 | 80015384 | 80015735 | 352  | 2.36  | 6.41E-07 | 1.61E-05 | ENSMUSG0000004889  | Zfp710      | protein_codi  | 80024814 | 80094173 | upstream     | -9254  | 9079   | shortestDistance |
| chr7 | 80166777 | 80167111 | 335  | 1.12  | 0.00841  | 0.0372   | ENSMUSG00000010875 | Gm45202     | lincRNA       | 80155169 | 80156771 | downstream   | 11775  | 10006  | shortestDistance |
| chr7 | 80375368 | 80375912 | 545  | 1.6   | 7.43E-06 | 0.000128 | ENSMUSG0000005315  | Fes         | protein_codi  | 80377756 | 80387946 | downstream   | 12306  | 1844   | shortestDistance |
| chr7 | 80495218 | 80495698 | 481  | 2.36  | 3.37E-07 | 9.40E-06 | ENSMUSG0000003052  | Blm         | protein_codi  | 80454733 | 80535119 | inside       | 39661  | 39421  | shortestDistance |
| chr7 | 80500906 | 80501324 | 419  | 2.13  | 1.72E-05 | 0.00026  | ENSMUSG0000003052  | Blm         | protein_codi  | 80454733 | 80535119 | inside       | 34004  | 33795  | shortestDistance |
| chr7 | 80629285 | 80629734 | 450  | 1.21  | 0.0022   | 0.0133   | ENSMUSG0000003052  | Crtc3       | protein_codi  | 80586627 | 80688877 | inside       | 59367  | 42658  | shortestDistance |
| chr7 | 80639775 | 80640195 | 421  | 2.18  | 6.01E-07 | 1.52E-05 | ENSMUSG0000000842  | Gm15880     | antisense_RI  | 80636017 | 80644384 | inside       | 3968   | 3758   | shortestDistance |
| chr7 | 80654360 | 80654764 | 405  | 2.26  | 4.47E-06 | 8.35E-05 | ENSMUSG0000003052  | Crtc3       | protein_codi  | 80586627 | 80688877 | inside       | 34315  | 34113  | shortestDistance |
| chr7 | 80715095 | 80715827 | 733  | 1.41  | 0.000541 | 0.00438  | ENSMUSG0000003053  | Iqgap1      | protein_codi  | 80711583 | 80825974 | inside       | 110513 | 3512   | shortestDistance |
| chr7 | 81060992 | 81061225 | 234  | 1.62  | 0.00398  | 0.0209   | ENSMUSG0000005908  | Plat32      | sense_intron  | 81059113 | 81066307 | inside       | 1995   | 1879   | shortestDistance |
| chr7 | 81232686 | 81233049 | 364  | 3.84  | 1.32E-11 | 1.67E-09 | ENSMUSG0000002558  | Pde8a       | protein_codi  | 81213596 | 81334533 | inside       | 19272  | 19090  | shortestDistance |
| chr7 | 81235176 | 81235510 | 335  | 2.81  | 6.20E-06 | 2.43E-06 | ENSMUSG0000002558  | Pde8a       | protein_codi  | 81213596 | 81334533 | inside       | 21747  | 21580  | shortestDistance |
| chr7 | 81849180 | 81850026 | 847  | 1.06  | 0.00766  | 0.0346   | ENSMUSG0000006637  | Gm10160     | protein_codi  | 81855533 | 81855794 | downstream   | 6191   | 5507   | shortestDistance |
| chr7 | 81854693 | 81855367 | 675  | 1.12  | 0.0014   | 0.00928  | ENSMUSG0000003062  | Fam1061     | protein_codi  | 81855533 | 81855794 | downstream   | 764    | 166    | shortestDistance |
| chr7 | 82110009 | 82110333 | 325  | -1.12 | 0.00875  | 0.0383   | ENSMUSG0000010898  | Gm45056     | lincRNA       | 82115766 | 82120432 | downstream   | 10261  | 5433   | shortestDistance |
| chr7 | 82625375 | 82625679 | 305  | 1.2   | 0.008    | 0.0358   | ENSMUSG0000003575  | Saxo2       | protein_codi  | 82632960 | 82648528 | downstream   | 23001  | 7281   | shortestDistance |
| chr7 | 82822559 | 82822991 | 433  | 1.61  | 0.00054  | 0.00438  | ENSMUSG0000003063  | 1700010L04F | lincRNA       | 82851599 | 82859849 | upstream     | -28824 | 28608  | shortestDistance |
| chr7 | 82890163 | 82890788 | 626  | 1.5   | 0.000117 | 0.00127  | ENSMUSG0000005737  | Me3xb3      | protein_codi  | 82867333 | 82871515 | downstream   | 23143  | 18648  | shortestDistance |
| chr7 | 83067081 | 83061090 | 310  | 3.28  | 3.70E-10 | 2.76E-08 | ENSMUSG0000005352  | AS30021J07F | lincRNA       | 83061783 | 83179429 | upstream     | -847   | 693    | shortestDistance |
| chr7 | 83075139 | 83075546 | 408  | 1.2   | 0.000373 | 0.00327  | ENSMUSG0000005352  | AS30021J07F | lincRNA       | 83061783 | 83179429 | inside       | 13559  | 13356  | shortestDistance |
| chr7 | 83075601 | 83079908 | 308  | 1.53  | 0.000741 | 0.00563  | ENSMUSG0000005352  | AS30021J07F | lincRNA       | 83061783 | 83179429 | inside       | 13971  | 13818  | shortestDistance |
| chr7 | 83095530 | 83094493 | 525  | 1.98  | 1.22E-06 | 2.78E-05 | ENSMUSG0000005352  | AS30021J07F | lincRNA       | 83061783 | 83179429 | inside       | 32448  | 32186  | shortestDistance |
| chr7 | 83426219 | 83426542 | 324  | -1.73 | 0.000395 | 0.00343  | ENSMUSG0000010883  | Gm7957      | processed_x   | 83411977 | 83414578 | downstream   | 14403  | 11641  | shortestDistance |
| chr7 | 83559530 | 83559833 | 304  | 1.62  | 0.00105  | 0.00739  | ENSMUSG0000009484  | Gm10610     | lincRNA       | 83536192 | 83550258 | upstream     | -9424  | 9272   | shortestDistance |
| chr7 | 83650663 | 83651049 | 387  | 1.79  | 3.50E-05 | 0.00047  | ENSMUSG0000004602  | StarD5      | protein_codi  | 83631959 | 83653127 | inside       | 18897  | 2078   | shortestDistance |
| chr7 | 83653636 | 83653956 | 321  | 2.39  | 7.14E-09 | 3.49E-07 | ENSMUSG0000000001  | 741I16      | protein_codi  | 83642825 | 83745726 | inside       | 91930  | 10811  | shortestDistance |
| chr7 | 83659113 | 83660039 | 927  | 1.31  | 0.000455 | 0.00383  | ENSMUSG0000000858  | 2310044K18F | antisense_RI  | 83659575 | 83660963 | overlapStart | 1      | 462    | shortestDistance |
| chr7 | 83668037 | 83668433 | 397  | 1.76  | 0.000165 | 0.00169  | ENSMUSG0000000001  | 741I16      | protein_codi  | 83642825 | 83745726 | inside       | 77491  | 25212  | shortestDistance |
| chr7 | 83677275 | 83677674 | 400  | -1.3  | 0.000244 | 0.00232  | ENSMUSG0000000001  | 741I16      | protein_codi  | 83642825 | 83745726 | inside       | 68252  | 34450  | shortestDistance |
| chr7 | 83717024 | 83717918 | 895  | -0.78 | 0.00826  | 0.0367   | ENSMUSG0000000001  | 741I16      | protein_codi  | 83642825 | 83745726 | inside       | 28255  | 27808  | shortestDistance |
| chr7 | 84173317 | 84173801 | 485  | 1.87  | 8.67E-06 | 0.000146 | ENSMUSG0000000970  | Gm26708     | bidirectional | 84152140 | 84195115 | inside       | 21419  | 21177  | shortestDistance |
| chr7 | 84197152 | 84197598 | 447  | 4.77  | 4.00E-14 | 1.28E-11 | ENSMUSG0000000970  | Gm26708     | bidirectional | 84152140 | 84195115 | downstream   | 45235  | 2037   | shortestDistance |
| chr7 | 84279276 | 84279645 | 370  | -1.75 | 0.00034  | 0.00304  | ENSMUSG0000001570  | Arnt2       | protein_codi  | 84246278 | 84410176 | inside       | 130716 | 32998  | shortestDistance |
| chr7 | 84424734 | 84425007 | 274  | -1.2  | 0.00451  | 0.023    | ENSMUSG0000010886  | Gm44933     | lincRNA       | 84435993 | 84439226 | downstream   | 14356  | 10986  | shortestDistance |
| chr7 | 84522383 | 84522838 | 456  | -3.23 | 1.25E-07 | 4.01E-06 | ENSMUSG0000009778  | Gm2115      | protein_codi  | 84528954 | 84583531 | upstream     | -6344  | 6116   | shortestDistance |
| chr7 | 84528693 | 84529469 | 777  | -1.42 | 3.47E-05 | 0.000467 | ENSMUSG0000009778  | Gm2115      | protein_codi  | 84528954 | 84583531 | overlapStart | 127    | 261    | shortestDistance |
| chr7 | 84594271 | 84594989 | 719  | -0.81 | 0.00993  | 0.0422   | ENSMUSG0000003063  | Fah         | protein_codi  | 84585159 | 84606722 | inside       | 12092  | 9112   | shortestDistance |
| chr7 | 84673094 | 84673360 | 267  | -1.1  | 0.00632  | 0.0299   | ENSMUSG0000003062  | Zfand6      | protein_codi  | 84613766 | 84689959 | inside       | 16732  | 16599  | shortestDistance |
| chr7 | 84679255 | 84679648 | 394  | -0.78 | 0.00827  | 0.0367   | ENSMUSG0000003062  | Zfand6      | protein_codi  | 84613766 | 84689959 | inside       | 10507  | 10311  | shortestDistance |
| chr7 | 84779124 | 84780106 | 983  | -0.94 | 0        |          |                    |             |               |          |          |              |        |        |                  |

|      |          |          |      |       |          |           |                                          |               |          |          |              |         |        |                  |
|------|----------|----------|------|-------|----------|-----------|------------------------------------------|---------------|----------|----------|--------------|---------|--------|------------------|
| chr7 | 89372000 | 89372304 | 305  | -1.5  | 0.00973  | 0.0416    | ENSMUSG0000003942Tmem135                 | protein_codi  | 89139714 | 89404222 | inside       | 32070   | 31918  | shortestDistance |
| chr7 | 89390745 | 89391032 | 288  | -1.34 | 0.00129  | 0.00873   | ENSMUSG0000010919Gm44996                 | TEC           | 89388344 | 89391323 | inside       | 435     | 291    | shortestDistance |
| chr7 | 89445020 | 89445581 | 562  | 3.94  | 1.45E-15 | 8.34E-13  | ENSMUSG0000010931A1314278                | lincRNA       | 89426306 | 89441928 | downstream   | 18994   | 3092   | shortestDistance |
| chr7 | 89459666 | 89460124 | 459  | 1.86  | 1.18E-05 | 0.00019   | ENSMUSG0000010931A1314278                | lincRNA       | 89426306 | 89441928 | downstream   | 33589   | 17738  | shortestDistance |
| chr7 | 89463828 | 89464743 | 916  | 1.48  | 1.75E-05 | 0.000265  | ENSMUSG0000010931A1314278                | lincRNA       | 89426306 | 89441928 | downstream   | 37980   | 21900  | shortestDistance |
| chr7 | 89493961 | 89500479 | 519  | -0.95 | 0.00547  | 0.0267    | ENSMUSG0000003940Prs23                   | protein_codi  | 89507783 | 89527187 | downstream   | 26967   | 7304   | shortestDistance |
| chr7 | 89605876 | 89606041 | 526  | -1.08 | 0.00961  | 0.0412    | ENSMUSG0000009801Gm2546                  | processed_p   | 89607706 | 89608696 | upstream     | -1568   | 1305   | shortestDistance |
| chr7 | 89632367 | 89633314 | 948  | -1.06 | 0.00297  | 0.0167    | ENSMUSG0000003062Me3                     | protein_codi  | 89632392 | 89854359 | overlapStart | 448     | 25     | shortestDistance |
| chr7 | 89640898 | 89641254 | 357  | -1.89 | 2.60E-05 | 0.000368  | ENSMUSG0000003062Me3                     | protein_codi  | 89632392 | 89854359 | inside       | 8684    | 8506   | shortestDistance |
| chr7 | 89678660 | 89679560 | 901  | -1.07 | 0.000837 | 0.0062    | ENSMUSG0000003062Me3                     | protein_codi  | 89632392 | 89854359 | inside       | 46718   | 46268  | shortestDistance |
| chr7 | 89710803 | 89711103 | 301  | -1.45 | 0.000696 | 0.00536   | ENSMUSG0000003062Me3                     | protein_codi  | 89632392 | 89854359 | inside       | 78561   | 78411  | shortestDistance |
| chr7 | 89829107 | 89829576 | 470  | -1.54 | 3.93E-05 | 0.000518  | ENSMUSG0000003062Me3                     | protein_codi  | 89632392 | 89854359 | inside       | 196950  | 24783  | shortestDistance |
| chr7 | 89835410 | 89836032 | 623  | -1.95 | 4.86E-07 | 1.28E-05  | ENSMUSG0000003062Me3                     | protein_codi  | 89632392 | 89854359 | inside       | 203329  | 18327  | shortestDistance |
| chr7 | 89903868 | 89904313 | 446  | -2.41 | 1.10E-06 | 2.54E-05  | ENSMUSG0000003939Cdc81                   | protein_codi  | 89866148 | 89903629 | upstream     | -461    | 239    | shortestDistance |
| chr7 | 90039527 | 90039816 | 290  | 1.16  | 0.00322  | 0.0177    | ENSMUSG0000009758E230029C05I             | processed_tr  | 89980723 | 90049069 | inside       | 58949   | 9253   | shortestDistance |
| chr7 | 90059746 | 90060882 | 1137 | -0.83 | 0.00603  | 0.0288    | ENSMUSG0000009758E230029C05I             | processed_tr  | 89980723 | 90049069 | downstream   | 79591   | 10677  | shortestDistance |
| chr7 | 90067800 | 90068430 | 631  | 1.21  | 0.00131  | 0.00881   | ENSMUSG0000009758E230029C05I             | processed_tr  | 89980723 | 90049069 | downstream   | 87392   | 18731  | shortestDistance |
| chr7 | 90138398 | 90138827 | 430  | 1.14  | 0.00231  | 0.0138    | ENSMUSG0000003936Picalm                  | protein_codi  | 90130213 | 90213465 | inside       | 8399    | 8185   | shortestDistance |
| chr7 | 90243235 | 90243989 | 755  | 1.66  | 4.69E-05 | 0.000599  | ENSMUSG0000003061Cdc83                   | protein_codi  | 90223873 | 90265777 | inside       | 22165   | 19362  | shortestDistance |
| chr7 | 90302737 | 90303424 | 688  | -1.28 | 0.000427 | 0.00364   | ENSMUSG0000003061Syt12                   | protein_codi  | 90302252 | 90410719 | inside       | 828     | 485    | shortestDistance |
| chr7 | 90312171 | 90312888 | 718  | -1.42 | 3.34E-05 | 0.000454  | ENSMUSG0000003061Syt12                   | protein_codi  | 90302252 | 90410719 | inside       | 10278   | 9919   | shortestDistance |
| chr7 | 90362800 | 90363213 | 414  | -1.32 | 0.000376 | 0.0033    | ENSMUSG0000003061Syt12                   | protein_codi  | 90302252 | 90410719 | inside       | 60754   | 47506  | shortestDistance |
| chr7 | 90522281 | 90522571 | 291  | -2.41 | 1.39E-06 | 3.08E-05  | ENSMUSG0000010887Dlg2                    | processed_tr  | 90476672 | 90522791 | inside       | 45754   | 220    | shortestDistance |
| chr7 | 90703478 | 90703775 | 298  | -1.82 | 3.77E-05 | 5.00E-04  | ENSMUSG0000010907Gm45162                 | processed_p   | 90811544 | 90812161 | downstream   | 108535  | 107769 | shortestDistance |
| chr7 | 90887100 | 90887662 | 563  | -1.23 | 0.00114  | 0.00794   | ENSMUSG0000010912Gm45159                 | lincRNA       | 90887072 | 90940052 | inside       | 309     | 28     | shortestDistance |
| chr7 | 91090752 | 91091789 | 1038 | -1.15 | 0.00129  | 0.00873   | ENSMUSG0000005257Dlg2                    | protein_codi  | 91090706 | 92449247 | inside       | 564     | 46     | shortestDistance |
| chr7 | 91092047 | 91092414 | 368  | -2.34 | 1.19E-08 | 5.44E-07  | ENSMUSG0000005257Dlg2                    | protein_codi  | 91090706 | 92449247 | inside       | 1524    | 1341   | shortestDistance |
| chr7 | 91226330 | 91226833 | 504  | -1.47 | 5.14E-05 | 0.000647  | ENSMUSG0000005257Dlg2                    | protein_codi  | 91090706 | 92449247 | inside       | 135876  | 135624 | shortestDistance |
| chr7 | 91261995 | 91262935 | 941  | -1.8  | 1.05E-06 | 2.45E-05  | ENSMUSG0000005257Dlg2                    | protein_codi  | 91090706 | 92449247 | inside       | 171759  | 171289 | shortestDistance |
| chr7 | 91267870 | 91268101 | 232  | -1.48 | 0.000594 | 0.00473   | ENSMUSG0000005257Dlg2                    | protein_codi  | 91090706 | 92449247 | inside       | 177280  | 171764 | shortestDistance |
| chr7 | 91431903 | 91432185 | 283  | -1.23 | 0.000637 | 0.005     | ENSMUSG0000005257Dlg2                    | protein_codi  | 91090706 | 92449247 | inside       | 341338  | 341197 | shortestDistance |
| chr7 | 91457192 | 91457646 | 455  | -1.15 | 7.00E-04 | 0.00539   | ENSMUSG0000005257Dlg2                    | protein_codi  | 91090706 | 92449247 | inside       | 366713  | 366486 | shortestDistance |
| chr7 | 91475175 | 91475568 | 394  | -2.14 | 2.16E-07 | 6.43E-06  | ENSMUSG0000005257Dlg2                    | protein_codi  | 91090706 | 92449247 | inside       | 384666  | 384469 | shortestDistance |
| chr7 | 91475916 | 91476290 | 375  | -2.11 | 4.37E-08 | 1.65E-06  | ENSMUSG0000005257Dlg2                    | protein_codi  | 91090706 | 92449247 | inside       | 385397  | 385210 | shortestDistance |
| chr7 | 91493156 | 91493611 | 456  | -1.3  | 0.00169  | 0.0108    | ENSMUSG0000005257Dlg2                    | protein_codi  | 91090706 | 92449247 | inside       | 402678  | 402450 | shortestDistance |
| chr7 | 91500037 | 91500490 | 454  | -3.43 | 6.96E-13 | 1.36E-10  | ENSMUSG0000005257Dlg2                    | protein_codi  | 91090706 | 92449247 | inside       | 409558  | 409331 | shortestDistance |
| chr7 | 91542554 | 91543419 | 866  | -1.58 | 2.96E-05 | 0.00041   | ENSMUSG0000005257Dlg2                    | protein_codi  | 91090706 | 92449247 | inside       | 452280  | 451848 | shortestDistance |
| chr7 | 91544310 | 91545166 | 857  | -1.54 | 0.000335 | 0.003     | ENSMUSG0000005257Dlg2                    | protein_codi  | 91090706 | 92449247 | inside       | 454032  | 453604 | shortestDistance |
| chr7 | 91548821 | 91549169 | 349  | -1.94 | 3.71E-06 | 7.12E-05  | ENSMUSG0000005257Dlg2                    | protein_codi  | 91090706 | 92449247 | inside       | 458289  | 458115 | shortestDistance |
| chr7 | 91582034 | 91582493 | 460  | -2.24 | 2.46E-06 | 5.02E-05  | ENSMUSG0000005257Dlg2                    | protein_codi  | 91090706 | 92449247 | inside       | 491558  | 491328 | shortestDistance |
| chr7 | 91601739 | 91601656 | 278  | -1.02 | 0.00733  | 0.0335    | ENSMUSG0000005257Dlg2                    | protein_codi  | 91090706 | 92449247 | inside       | 510812  | 510673 | shortestDistance |
| chr7 | 91675436 | 91675900 | 465  | -1.03 | 0.0054   | 0.0265    | ENSMUSG0000005257Dlg2                    | protein_codi  | 91090706 | 92449247 | inside       | 584962  | 584730 | shortestDistance |
| chr7 | 91863074 | 91863719 | 646  | -1.79 | 1.48E-05 | 0.000229  | ENSMUSG0000005257Dlg2                    | protein_codi  | 91090706 | 92449247 | inside       | 772690  | 772690 | shortestDistance |
| chr7 | 91864184 | 91864473 | 290  | -1.55 | 4.46E-05 | 0.000575  | ENSMUSG0000005257Dlg2                    | protein_codi  | 91090706 | 92449247 | inside       | 773622  | 773622 | shortestDistance |
| chr7 | 92093903 | 92094268 | 366  | -1.07 | 0.00148  | 0.0097    | ENSMUSG0000010938A930567K12Iantisense_RI | antisense_RI  | 92092206 | 92119511 | inside       | 25425   | 1697   | shortestDistance |
| chr7 | 92180463 | 92181647 | 1185 | -0.9  | 0.00422  | 0.0219    | ENSMUSG0000005257Dlg2                    | protein_codi  | 91090706 | 92449247 | inside       | 1090349 | 267600 | shortestDistance |
| chr7 | 92181870 | 92182584 | 715  | -0.82 | 0.00802  | 0.0359    | ENSMUSG0000005257Dlg2                    | protein_codi  | 91090706 | 92449247 | inside       | 1091521 | 266663 | shortestDistance |
| chr7 | 92258678 | 92259303 | 626  | -1.34 | 0.00126  | 0.00855   | ENSMUSG0000005257Dlg2                    | protein_codi  | 91090706 | 92449247 | inside       | 1168284 | 189944 | shortestDistance |
| chr7 | 92323622 | 92324055 | 434  | -1.15 | 0.00125  | 0.00853   | ENSMUSG0000005257Dlg2                    | protein_codi  | 91090706 | 92449247 | inside       | 1233132 | 125192 | shortestDistance |
| chr7 | 92361927 | 92362381 | 455  | -1.99 | 3.71E-06 | 7.12E-05  | ENSMUSG0000005257Dlg2                    | protein_codi  | 91090706 | 92449247 | inside       | 1271448 | 86866  | shortestDistance |
| chr7 | 92424542 | 92425276 | 735  | -1.15 | 0.000442 | 0.00374   | ENSMUSG0000005257Dlg2                    | protein_codi  | 91090706 | 92449247 | inside       | 1334203 | 23971  | shortestDistance |
| chr7 | 92457853 | 92458690 | 838  | 1.07  | 0.002    | 0.0123    | ENSMUSG0000005257Dlg2                    | protein_codi  | 91090706 | 92449247 | downstream   | 1367566 | 8606   | shortestDistance |
| chr7 | 92711386 | 92711971 | 586  | -1.06 | 0.000825 | 0.00613   | ENSMUSG0000010939Gm45199                 | TEC           | 92706773 | 92708279 | downstream   | 4905    | 3107   | shortestDistance |
| chr7 | 92798739 | 92799141 | 403  | -1.86 | 5.48E-06 | 9.94E-05  | ENSMUSG0000003064Rab30                   | protein_codi  | 92741603 | 92844535 | inside       | 57337   | 45394  | shortestDistance |
| chr7 | 92832401 | 92832864 | 464  | 2.61  | 3.99E-11 | 4.24E-09  | ENSMUSG0000003064Rab30                   | protein_codi  | 92741603 | 92844535 | inside       | 91029   | 11671  | shortestDistance |
| chr7 | 92903479 | 92904239 | 761  | -0.85 | 0.00997  | 0.0423    | ENSMUSG0000006111Prcp                    | protein_codi  | 92874470 | 92934583 | inside       | 29389   | 29009  | shortestDistance |
| chr7 | 92961811 | 92962219 | 409  | -2.23 | 1.33E-08 | 5.99E-07  | ENSMUSG0000010899Gm31663                 | transcribed_1 | 92979876 | 93006513 | upstream     | -17861  | 17657  | shortestDistance |
| chr7 | 92967405 | 92967900 | 496  | -0.96 | 0.0075   | 0.0341    | ENSMUSG0000010899Gm31663                 | transcribed_1 | 92979876 | 93006513 | upstream     | -12224  | 11976  | shortestDistance |
| chr7 | 92978275 | 92979019 | 745  | -1.04 | 0.00117  | 0.00806   | ENSMUSG0000010899Gm31663                 | transcribed_1 | 92979876 | 93006513 | upstream     | -1229   | 857    | shortestDistance |
| chr7 | 93002568 | 93003119 | 552  | -1.71 | 3.28E-05 | 0.000446  | ENSMUSG0000010899Gm31663                 | transcribed_1 | 92979876 | 93006513 | inside       | 22968   | 3394   | shortestDistance |
| chr7 | 93006771 | 93007293 | 523  | -1.83 | 1.30E-06 | 2.91E-05  | ENSMUSG0000009764Gm26862                 | sense_overla  | 93006982 | 93104789 | overlapStart | 50      | 211    | shortestDistance |
| chr7 | 93013288 | 93013626 | 339  | -1.48 | 0.000271 | 0.00253   | ENSMUSG0000009764Gm26862                 | sense_overla  | 93006982 | 93104789 | inside       | 6475    | 6306   | shortestDistance |
| chr7 | 93038404 | 93038875 | 472  | -1.44 | 0.000215 | 0.0021    | ENSMUSG0000009764Gm26862                 | sense_overla  | 93006982 | 93104789 | inside       | 31658   | 31422  | shortestDistance |
| chr7 | 93079619 | 93081272 | 1654 | -1.11 | 0.00103  | 0.00731   | ENSMUSG0000005406Gm9934                  | antisense_RI  | 93052081 | 93081027 | overlapStart | 581     | 245    | shortestDistance |
| chr7 | 93093629 | 93094221 | 593  | -0.86 | 0.00978  | 0.0417    | ENSMUSG0000009764Gm26862                 | sense_overla  | 93006982 | 93104789 | inside       | 86943   | 10568  | shortestDistance |
| chr7 | 93095461 | 93095977 | 517  | -0.82 | 0.0103   | 0.0433    | ENSMUSG0000009764Gm26862                 | sense_overla  | 93006982 | 93104789 | inside       | 88737   | 8812   | shortestDistance |
| chr7 | 93123964 | 93124501 | 538  | -2.36 | 5.62E-08 | 2.04E-06  | ENSMUSG0000009764Gm26862                 | sense_overla  | 93006982 | 93104789 | downstream   | 117250  | 19175  | shortestDistance |
| chr7 | 93135739 | 93136818 | 1080 | -2.2  | 1.17E-06 | 2.67E-05  | ENSMUSG0000008887Gm25860                 | snoRNA        | 93147846 | 93147971 | downstream   | 11693   | 11028  | shortestDistance |
| chr7 | 93147397 | 93147734 | 338  | -1.67 | 1.07E-05 | 0.000174  | ENSMUSG0000008887Gm25860                 | snoRNA        | 93147846 | 93147971 | downstream   | 405     | 112    | shortestDistance |
| chr7 | 93198215 | 93198559 | 345  | -2.51 | 1.22E-08 | 5.198E-07 | ENSMUSG0000008741Gm15501                 | transcribed_1 | 93178983 | 93184176 | upstream     | -14211  | 14039  | shortestDistance |
| chr7 | 93254340 | 93254891 | 552  | -3.57 | 5.10E-13 | 1.07E-10  | ENSMUSG0000010917Gm44947                 | lincRNA       | 93290700 | 93323950 | downstream   | 69334   | 35809  | shortestDistance |
| chr7 | 93332225 | 93332721 | 497  | -1.85 | 1.22E-07 | 3.92E-06  | ENSMUSG0000010917Gm44947                 | lincRNA       | 93290700 | 93323950 | downstream   | -8523   | 8275   | short            |

|      |           |           |      |       |          |          |                    |          |               |           |           |              |        |       |                  |
|------|-----------|-----------|------|-------|----------|----------|--------------------|----------|---------------|-----------|-----------|--------------|--------|-------|------------------|
| chr7 | 97446544  | 97446936  | 393  | -1.18 | 0.00479  | 0.0241   | ENSMUSG00000005172 | Kctd14   | protein_codi  | 97451323  | 97459557  | upstream     | -4583  | 4387  | shortestDistance |
| chr7 | 97764884  | 97765795  | 912  | 0.97  | 0.00302  | 0.0169   | ENSMUSG00000003077 | Pak1     | protein_codi  | 97788541  | 97912381  | upstream     | -23201 | 22746 | shortestDistance |
| chr7 | 98082441  | 98082728  | 288  | 1.1   | 0.00914  | 0.0396   | ENSMUSG00000003076 | Myo7a    | protein_codi  | 98051060  | 98119524  | inside       | 36940  | 31381 | shortestDistance |
| chr7 | 98200402  | 98200774  | 373  | 2.16  | 1.51E-06 | 3.32E-05 | ENSMUSG00000007400 | B3gnt6   | protein_codi  | 98192417  | 98199481  | upstream     | -1107  | 921   | shortestDistance |
| chr7 | 99146200  | 99146488  | 289  | 3.05  | 3.97E-11 | 4.23E-09 | ENSMUSG00000010946 | Gm45185  | TEC           | 99141593  | 99141996  | downstream   | 4751   | 4204  | shortestDistance |
| chr7 | 99248206  | 99248610  | 405  | 1.54  | 0.000794 | 0.00594  | ENSMUSG00000010947 | Gm18943  | processed_p   | 99247605  | 99248820  | inside       | 412    | 210   | shortestDistance |
| chr7 | 99711158  | 99711477  | 320  | 2.02  | 0.000163 | 0.00167  | ENSMUSG00000003073 | Sico2b1  | protein_codi  | 99657804  | 99711340  | overlapStart | 22     | 137   | shortestDistance |
| chr7 | 99887316  | 99887716  | 401  | 3.44  | 1.25E-12 | 2.20E-10 | ENSMUSG00000010900 | Gm38405  | antisense_RI  | 99870666  | 99889358  | inside       | 1842   | 1642  | shortestDistance |
| chr7 | 99887797  | 99888119  | 323  | 2.32  | 7.83E-07 | 1.91E-05 | ENSMUSG00000010900 | Gm38405  | antisense_RI  | 99870666  | 99889358  | inside       | 1400   | 1239  | shortestDistance |
| chr7 | 100443776 | 100444101 | 326  | 1.3   | 0.00449  | 0.0229   | ENSMUSG00000004724 | C2cd3    | protein_codi  | 100372233 | 100470152 | inside       | 71705  | 26051 | shortestDistance |
| chr7 | 100964014 | 100964571 | 558  | 2.2   | 3.13E-06 | 6.17E-05 | ENSMUSG00000004877 | P2ry6    | protein_codi  | 100937630 | 100974649 | inside       | 10357  | 10078 | shortestDistance |
| chr7 | 100991025 | 100991329 | 305  | 1.21  | 0.00549  | 0.0268   | ENSMUSG00000003286 | P2ry2    | protein_codi  | 100996568 | 101012866 | downstream   | 21689  | 5239  | shortestDistance |
| chr7 | 100991936 | 100992450 | 515  | 2.26  | 1.82E-07 | 5.55E-06 | ENSMUSG00000003286 | P2ry2    | protein_codi  | 100996568 | 101012866 | downstream   | 20673  | 4118  | shortestDistance |
| chr7 | 101027645 | 101028069 | 425  | 1.48  | 0.00113  | 0.00784  | ENSMUSG00000010889 | Gm45070  | processed_p   | 101018623 | 101018868 | upstream     | -8989  | 8777  | shortestDistance |
| chr7 | 101093217 | 101093608 | 392  | 1.53  | 0.000163 | 0.00168  | ENSMUSG00000003069 | Fchs42   | protein_codi  | 101092863 | 101284405 | inside       | 549    | 354   | shortestDistance |
| chr7 | 101362682 | 101363283 | 602  | 1.15  | 0.000683 | 0.00528  | ENSMUSG00000003281 | Arap1    | protein_codi  | 101348067 | 101412586 | inside       | 14915  | 14615 | shortestDistance |
| chr7 | 101450875 | 101451515 | 641  | 1.22  | 0.00106  | 0.00747  | ENSMUSG00000011019 | Pde2a    | protein_codi  | 101421691 | 101512827 | inside       | 29504  | 29184 | shortestDistance |
| chr7 | 101673497 | 101673813 | 317  | -1.39 | 0.000941 | 0.0068   | ENSMUSG00000000182 | Clpb     | protein_codi  | 101663633 | 101795506 | inside       | 10022  | 9864  | shortestDistance |
| chr7 | 101906816 | 101907329 | 424  | 1.13  | 0.00232  | 0.0138   | ENSMUSG00000003084 | Lamtor1  | protein_codi  | 101905904 | 101926675 | inside       | 1124   | 912   | shortestDistance |
| chr7 | 101952138 | 101952550 | 413  | 1.03  | 0.00545  | 0.0266   | ENSMUSG00000006630 | Numa1    | protein_codi  | 101934111 | 102014964 | inside       | 18233  | 18027 | shortestDistance |
| chr7 | 102222308 | 102222656 | 349  | 0.93  | 0.0123   | 0.0496   | ENSMUSG00000003099 | Pgap2    | protein_codi  | 102210208 | 102238567 | inside       | 12274  | 12100 | shortestDistance |
| chr7 | 102243878 | 102244261 | 384  | 1.1   | 0.000894 | 0.00652  | ENSMUSG00000007398 | Rhog     | protein_codi  | 102239123 | 102256054 | inside       | 11984  | 4755  | shortestDistance |
| chr7 | 102258123 | 102258554 | 432  | 1.52  | 8.81E-05 | 0.001    | ENSMUSG00000009738 | Rhog     | protein_codi  | 102239123 | 102256054 | upstream     | -2284  | 2069  | shortestDistance |
| chr7 | 102259734 | 102260060 | 327  | 2.73  | 1.25E-06 | 2.82E-05 | ENSMUSG00000007398 | Rhog     | protein_codi  | 102239123 | 102256054 | upstream     | -3843  | 3680  | shortestDistance |
| chr7 | 102298937 | 102299318 | 482  | -1.19 | 0.00814  | 0.0363   | ENSMUSG00000003098 | Stim1    | protein_codi  | 102267806 | 102437319 | inside       | 22272  | 22031 | shortestDistance |
| chr7 | 102313202 | 102313640 | 439  | 2.11  | 7.72E-07 | 7.82E-06 | ENSMUSG00000003098 | Stim1    | protein_codi  | 102267806 | 102437319 | inside       | 45615  | 45396 | shortestDistance |
| chr7 | 102314145 | 102314428 | 284  | 1.36  | 0.00424  | 0.0219   | ENSMUSG00000003098 | Stim1    | protein_codi  | 102267806 | 102437319 | inside       | 46480  | 46339 | shortestDistance |
| chr7 | 102516297 | 102516810 | 514  | -1.43 | 0.0013   | 0.0088   | ENSMUSG00000010982 | Gm8556   | processed_p   | 102520346 | 102521009 | downstream   | 4455   | 3536  | shortestDistance |
| chr7 | 102597292 | 102598136 | 845  | -1.19 | 0.00173  | 0.011    | ENSMUSG00000007397 | Olfr552  | protein_codi  | 102597770 | 102608125 | overlapStart | -56    | 366   | shortestDistance |
| chr7 | 102619493 | 102619946 | 454  | -1.23 | 0.00172  | 0.011    | ENSMUSG00000007397 | Olfr553  | protein_codi  | 102611281 | 102618218 | upstream     | -1502  | 1275  | shortestDistance |
| chr7 | 102666767 | 102687548 | 782  | -0.81 | 0.00623  | 0.0295   | ENSMUSG00000007396 | Trim68   | protein_codi  | 102677582 | 102687327 | overlapStart | 169    | 221   | shortestDistance |
| chr7 | 103089822 | 103089364 | 443  | -1.39 | 0.000162 | 0.00166  | ENSMUSG00000007394 | Hbb-bt   | protein_codi  | 103812524 | 103813996 | downstream   | 6753   | 3160  | shortestDistance |
| chr7 | 103099334 | 103091062 | 779  | -0.91 | 0.01005  | 0.0439   | ENSMUSG00000011025 | Olfr65   | protein_codi  | 103903487 | 103908650 | downstream   | 4836   | 1184  | shortestDistance |
| chr7 | 103951563 | 103951867 | 305  | -2.04 | 1.03E-05 | 0.000169 | ENSMUSG00000007393 | Olfr633  | protein_codi  | 103944437 | 103948963 | downstream   | 7278   | 2600  | shortestDistance |
| chr7 | 103971767 | 103972234 | 468  | 2.54  | 6.76E-09 | 3.33E-07 | ENSMUSG00000009452 | Olfr635  | protein_codi  | 103971152 | 103987540 | inside       | 848    | 615   | shortestDistance |
| chr7 | 103999102 | 103999410 | 309  | 2.32  | 3.16E-06 | 6.23E-05 | ENSMUSG00000009406 | Olfr638  | protein_codi  | 103998746 | 104004357 | inside       | 510    | 356   | shortestDistance |
| chr7 | 104179128 | 104179489 | 362  | 3.13  | 8.13E-09 | 3.89E-07 | ENSMUSG00000004290 | Olfr648  | protein_codi  | 104177598 | 104183392 | inside       | 4084   | 1530  | shortestDistance |
| chr7 | 104216113 | 104216546 | 434  | 1.13  | 0.000577 | 0.00462  | ENSMUSG00000007242 | Trim6    | protein_codi  | 104218793 | 104235152 | upstream     | -2463  | 2247  | shortestDistance |
| chr7 | 104288043 | 104288393 | 351  | -1.02 | 0.00869  | 0.0381   | ENSMUSG00000006044 | Trim5    | protein_codi  | 104263386 | 104288094 | overlapStart | -124   | 51    | shortestDistance |
| chr7 | 104507117 | 104508476 | 1360 | -1.4  | 0.000203 | 0.002    | ENSMUSG00000005759 | Trim30d  | protein_codi  | 104470014 | 104507849 | overlapStart | 53     | 627   | shortestDistance |
| chr7 | 104646962 | 104647546 | 585  | -1.11 | 0.00133  | 0.00894  | ENSMUSG00000007042 | Olfr658  | protein_codi  | 104642877 | 104647305 | overlapStart | 51     | 241   | shortestDistance |
| chr7 | 105380406 | 105381198 | 793  | 1.92  | 4.26E-06 | 8.02E-05 | ENSMUSG00000004446 | Fam160a2 | protein_codi  | 105371211 | 105400054 | inside       | 19252  | 9195  | shortestDistance |
| chr7 | 105387744 | 105388070 | 327  | 2.64  | 1.95E-06 | 4.13E-05 | ENSMUSG00000004446 | Fam160a2 | protein_codi  | 105371211 | 105400054 | inside       | 12147  | 11984 | shortestDistance |
| chr7 | 105390063 | 105390619 | 557  | 2.76  | 2.66E-10 | 2.09E-08 | ENSMUSG00000004446 | Fam160a2 | protein_codi  | 105371211 | 105400054 | inside       | 9713   | 9435  | shortestDistance |
| chr7 | 105425367 | 105426359 | 993  | -1.43 | 0.000312 | 0.00283  | ENSMUSG00000003899 | Cckbr    | protein_codi  | 105425731 | 105470898 | overlapStart | 132    | 364   | shortestDistance |
| chr7 | 105481644 | 105482694 | 1051 | -1.27 | 0.000277 | 0.00257  | ENSMUSG00000010973 | Gm45667  | TEC           | 105481927 | 105483242 | overlapStart | 242    | 283   | shortestDistance |
| chr7 | 105527392 | 105527711 | 320  | -1.01 | 0.00657  | 0.0308   | ENSMUSG00000003704 | Smpd1    | protein_codi  | 105554360 | 105558389 | upstream     | -26808 | 26649 | shortestDistance |
| chr7 | 105690862 | 105691273 | 412  | 1.1   | 0.0085   | 0.0375   | ENSMUSG00000003088 | Dhnd1    | protein_codi  | 105650827 | 105721799 | upstream     | 40241  | 30526 | shortestDistance |
| chr7 | 106236751 | 106237359 | 1169 | -0.84 | 0.00752  | 0.0341   | ENSMUSG00000004586 | Gvin1    | protein_codi  | 106156556 | 106215326 | upstream     | -21449 | 20865 | shortestDistance |
| chr7 | 106352405 | 106352831 | 427  | -2.08 | 6.29E-07 | 1.59E-05 | ENSMUSG00000009745 | Gm8989   | unprocessed   | 106323414 | 106330688 | upstream     | -21930 | 21717 | shortestDistance |
| chr7 | 106440397 | 10644517  | 1121 | -1.33 | 4.56E-05 | 0.000586 | ENSMUSG00000007767 | Gm22372  | snoRNA        | 106426712 | 106426847 | downstream   | 12425  | 13550 | shortestDistance |
| chr7 | 106529600 | 106530045 | 446  | -0.92 | 0.0077   | 0.0348   | ENSMUSG00000006328 | Gm8995   | transcribed_i | 106504239 | 106511671 | upstream     | -18151 | 17929 | shortestDistance |
| chr7 | 106616901 | 106617481 | 581  | -2.08 | 7.89E-06 | 0.000135 | ENSMUSG00000007930 | Gm1966   | unprocessed   | 106596743 | 106604035 | upstream     | -13156 | 12866 | shortestDistance |
| chr7 | 106696960 | 106697240 | 281  | 1.67  | 0.00047  | 0.00393  | ENSMUSG00000006422 | Olfr694  | protein_codi  | 106684980 | 106691814 | upstream     | -5286  | 5146  | shortestDistance |
| chr7 | 106788328 | 106788669 | 342  | -2.16 | 1.71E-07 | 5.26E-06 | ENSMUSG00000009671 | Olfr699  | protein_codi  | 106787963 | 106793198 | inside       | 4700   | 365   | shortestDistance |
| chr7 | 106815813 | 106816169 | 357  | -0.89 | 0.0113   | 0.0467   | ENSMUSG00000003674 | Olfr701  | protein_codi  | 106814129 | 106821472 | inside       | 1862   | 1684  | shortestDistance |
| chr7 | 106817000 | 106817602 | 603  | -0.9  | 0.00746  | 0.0339   | ENSMUSG00000003674 | Olfr701  | protein_codi  | 106814129 | 106821472 | inside       | 3172   | 2871  | shortestDistance |
| chr7 | 107047626 | 107048068 | 443  | -1.45 | 0.00035  | 0.00311  | ENSMUSG00000007389 | Olfr713  | protein_codi  | 107031174 | 107040994 | downstream   | 16673  | 6632  | shortestDistance |
| chr7 | 107516679 | 107517086 | 408  | -1.45 | 0.00132  | 0.00888  | ENSMUSG00000006254 | Syt9     | protein_codi  | 107370728 | 107548656 | inside       | 146154 | 31570 | shortestDistance |
| chr7 | 107526365 | 107526813 | 449  | -0.93 | 0.0111   | 0.046    | ENSMUSG00000006254 | Syt9     | protein_codi  | 107370728 | 107548656 | inside       | 155861 | 21843 | shortestDistance |
| chr7 | 107545819 | 107546286 | 468  | -1.26 | 0.0045   | 0.023    | ENSMUSG00000006254 | Syt9     | protein_codi  | 107370728 | 107548656 | inside       | 175324 | 2370  | shortestDistance |
| chr7 | 107561161 | 107562158 | 998  | -1.43 | 4.26E-05 | 0.000554 | ENSMUSG00000005104 | Olfr1m1  | protein_codi  | 107567446 | 107591094 | upstream     | -5786  | 5288  | shortestDistance |
| chr7 | 107568940 | 107569499 | 560  | -1.08 | 0.00566  | 0.0274   | ENSMUSG00000005104 | Olfr1m1  | protein_codi  | 107567446 | 107591094 | inside       | 1774   | 1494  | shortestDistance |
| chr7 | 107617928 | 107618252 | 325  | -1.05 | 0.00476  | 0.0239   | ENSMUSG00000003652 | PfPltp2  | protein_codi  | 107595207 | 107748583 | inside       | 22883  | 22721 | shortestDistance |
| chr7 | 107619126 | 107619473 | 348  | -1.17 | 0.00379  | 0.0201   | ENSMUSG00000003652 | PfPltp2  | protein_codi  | 107595207 | 107748583 | inside       | 24093  | 23919 | shortestDistance |
| chr7 | 107647409 | 107647684 | 276  | -1.18 | 0.00224  | 0.0134   | ENSMUSG00000003652 | PfPltp2  | protein_codi  | 107595207 | 107748583 | inside       | 52339  | 52202 | shortestDistance |
| chr7 | 107666059 | 107666618 | 560  | -1    | 0.00115  | 0.00798  | ENSMUSG00000003652 | PfPltp2  | protein_codi  | 107595207 | 107748583 | inside       | 71131  | 70852 | shortestDistance |
| chr7 | 107756762 | 107757086 | 325  | -1.62 | 1.23E-05 | 0.000197 | ENSMUSG00000004806 | Cybsr2   | protein_codi  | 107748455 | 107758032 | inside       | 1108   | 946   | shortestDistance |
| chr7 | 107788208 | 107788777 | 570  | -0.97 | 0.00624  | 0.0295   | ENSMUSG00000004823 | Ovch2    | protein_codi  | 107781544 | 107801208 | inside       | 12716  | 6664  | shortestDistance |
| chr7 | 107819510 | 107819826 | 317  | -1.42 | 0.00018  |          |                    |          |               |           |           |              |        |       |                  |

|      |           |           |      |       |          |          |                              |               |           |           |              |        |        |                  |
|------|-----------|-----------|------|-------|----------|----------|------------------------------|---------------|-----------|-----------|--------------|--------|--------|------------------|
| chr7 | 113861924 | 113862328 | 405  | 1.9   | 0.000125 | 0.00134  | ENSMUSG0000003815Spon1       | protein_codi  | 113765998 | 114043370 | inside       | 96128  | 95926  | shortestDistance |
| chr7 | 114181525 | 114181813 | 289  | 1.32  | 0.00536  | 0.0263   | ENSMUSG0000011040Gm45454     | processed_g   | 114208634 | 114209088 | downstream   | 27419  | 26821  | shortestDistance |
| chr7 | 114193637 | 114194099 | 463  | 1.92  | 1.76E-06 | 3.77E-05 | ENSMUSG0000011040Gm45454     | processed_g   | 114208634 | 114209088 | downstream   | 15220  | 14535  | shortestDistance |
| chr7 | 114194253 | 114194629 | 377  | 1.95  | 5.33E-06 | 9.71E-05 | ENSMUSG0000011040Gm45454     | processed_g   | 114208634 | 114209088 | downstream   | 14647  | 14005  | shortestDistance |
| chr7 | 114194840 | 114195170 | 331  | 2.01  | 7.64E-06 | 0.000132 | ENSMUSG0000011040Gm45454     | processed_g   | 114208634 | 114209088 | downstream   | 14083  | 13464  | shortestDistance |
| chr7 | 114275706 | 114276435 | 730  | 1.16  | 0.000364 | 0.00321  | ENSMUSG0000003075Psm1a       | protein_codi  | 114264606 | 114276118 | overlapStart | 48     | 317    | shortestDistance |
| chr7 | 114292387 | 114292962 | 576  | 1.45  | 2.88E-05 | 4.00E-04 | ENSMUSG0000003075Psm1a       | protein_codi  | 114264606 | 114276118 | upstream     | -16556 | 16269  | shortestDistance |
| chr7 | 114316257 | 114316812 | 556  | 1.34  | 0.000733 | 0.00558  | ENSMUSG00000087474933406i18R | lincRNA       | 114315479 | 114415161 | inside       | 98627  | 778    | shortestDistance |
| chr7 | 114347042 | 114347418 | 377  | 1.36  | 0.00154  | 0.01     | ENSMUSG00000087474933406i18R | lincRNA       | 114315479 | 114415161 | inside       | 67931  | 31563  | shortestDistance |
| chr7 | 114356276 | 114357057 | 782  | 0.96  | 0.0038   | 0.0201   | ENSMUSG00000087474933406i18R | lincRNA       | 114315479 | 114415161 | inside       | 58495  | 40797  | shortestDistance |
| chr7 | 114439807 | 114440072 | 266  | 1.72  | 0.0019   | 0.0118   | ENSMUSG0000003067Pde3b       | protein_codi  | 114415281 | 114539251 | inside       | 24659  | 24526  | shortestDistance |
| chr7 | 114440541 | 114440783 | 243  | 1.9   | 0.000812 | 0.00605  | ENSMUSG0000003067Pde3b       | protein_codi  | 114415281 | 114539251 | inside       | 25381  | 25260  | shortestDistance |
| chr7 | 114452977 | 114453681 | 705  | 1.25  | 0.00218  | 0.0132   | ENSMUSG0000003067Pde3b       | protein_codi  | 114415281 | 114539251 | inside       | 38048  | 37696  | shortestDistance |
| chr7 | 114459881 | 114460384 | 504  | 2.11  | 1.07E-06 | 2.49E-05 | ENSMUSG0000003067Pde3b       | protein_codi  | 114415281 | 114539251 | inside       | 44851  | 44600  | shortestDistance |
| chr7 | 114526310 | 114526568 | 259  | 1.27  | 0.00825  | 0.0367   | ENSMUSG0000003067Pde3b       | protein_codi  | 114415281 | 114539251 | inside       | 111158 | 12683  | shortestDistance |
| chr7 | 114892657 | 114893085 | 429  | 1.18  | 0.00211  | 0.0128   | ENSMUSG0000004641Rps4l-ps    | processed_g   | 114926959 | 114927726 | downstream   | 34855  | 33874  | shortestDistance |
| chr7 | 115019350 | 115019789 | 440  | 1.46  | 0.000631 | 0.00496  | ENSMUSG0000010872Gm34225     | lincRNA       | 115031937 | 115066824 | upstream     | -12367 | 12148  | shortestDistance |
| chr7 | 115073461 | 115073732 | 272  | -1.47 | 0.00104  | 0.00739  | ENSMUSG0000010872Gm34225     | lincRNA       | 115031937 | 115066824 | downstream   | 41659  | 6637   | shortestDistance |
| chr7 | 115084860 | 115085295 | 616  | 1.02  | 0.00405  | 0.0212   | ENSMUSG0000010872Gm34225     | lincRNA       | 115031937 | 115066824 | downstream   | 53051  | 17856  | shortestDistance |
| chr7 | 115251552 | 115251993 | 442  | 3.09  | 3.26E-13 | 7.30E-11 | ENSMUSG0000010840Rpl19-ps10  | processed_g   | 115172056 | 115172385 | downstream   | 79716  | 79167  | shortestDistance |
| chr7 | 115252049 | 115252396 | 348  | 2.89  | 2.66E-11 | 3.03E-09 | ENSMUSG0000010840Rpl19-ps10  | processed_g   | 115172056 | 115172385 | downstream   | 80166  | 79664  | shortestDistance |
| chr7 | 115540122 | 115540580 | 459  | 1.27  | 0.000281 | 0.0026   | ENSMUSG00000005191Sox6       | protein_codi  | 115470872 | 116038796 | inside       | 498445 | 69250  | shortestDistance |
| chr7 | 115844421 | 115844742 | 322  | 2.71  | 4.45E-07 | 1.19E-05 | ENSMUSG00000005191Sox6       | protein_codi  | 115470872 | 116038796 | inside       | 194214 | 194054 | shortestDistance |
| chr7 | 115967262 | 115967553 | 292  | 3.31  | 2.94E-07 | 8.35E-06 | ENSMUSG00000005191Sox6       | protein_codi  | 115470872 | 116038796 | inside       | 71388  | 71243  | shortestDistance |
| chr7 | 116153805 | 116154227 | 423  | -1.13 | 0.000985 | 0.00705  | ENSMUSG0000004565Plekha7     | protein_codi  | 116123485 | 116308376 | inside       | 154360 | 30320  | shortestDistance |
| chr7 | 116198333 | 116198738 | 406  | -1.12 | 0.00732  | 0.0334   | ENSMUSG0000004565Plekha7     | protein_codi  | 116123485 | 116308376 | inside       | 109840 | 74848  | shortestDistance |
| chr7 | 116200880 | 116201160 | 281  | 1.4   | 0.00851  | 0.0375   | ENSMUSG0000004565Plekha7     | protein_codi  | 116123485 | 116308376 | inside       | 107356 | 77395  | shortestDistance |
| chr7 | 116206871 | 116207545 | 675  | 1.38  | 0.00234  | 0.0139   | ENSMUSG0000004565Plekha7     | protein_codi  | 116123485 | 116308376 | inside       | 101168 | 8386   | shortestDistance |
| chr7 | 116230731 | 116231626 | 896  | 1.07  | 0.00323  | 0.0178   | ENSMUSG0000004565Plekha7     | protein_codi  | 116123485 | 116308376 | inside       | 77198  | 76750  | shortestDistance |
| chr7 | 116446708 | 116447066 | 359  | 1.33  | 0.00243  | 0.0143   | ENSMUSG0000010846AV356131    | bidirectional | 116443575 | 116444324 | downstream   | 3312   | 2384   | shortestDistance |
| chr7 | 116491116 | 116491361 | 246  | 1.11  | 0.00768  | 0.0347   | ENSMUSG0000010856Gm45031     | processed_g   | 116492117 | 116492404 | downstream   | 1166   | 756    | shortestDistance |
| chr7 | 116494420 | 116495136 | 717  | 2.43  | 2.23E-10 | 1.81E-08 | ENSMUSG0000010856Gm45031     | processed_g   | 116492117 | 116492404 | upstream     | -2374  | 2016   | shortestDistance |
| chr7 | 116515348 | 116515871 | 524  | 2.7   | 1.86E-08 | 7.96E-07 | ENSMUSG0000003065Nucb2       | protein_codi  | 116504369 | 116540584 | inside       | 11241  | 10979  | shortestDistance |
| chr7 | 117139469 | 117139778 | 310  | -1.56 | 0.000259 | 0.00244  | ENSMUSG0000010830Gm39075     | lincRNA       | 117229607 | 117278839 | upstream     | -89983 | 89829  | shortestDistance |
| chr7 | 117470125 | 117470863 | 739  | 1.43  | 0.000575 | 0.00461  | ENSMUSG0000003065Xylt1       | protein_codi  | 117380979 | 117673580 | inside       | 89515  | 89146  | shortestDistance |
| chr7 | 117481428 | 117481761 | 334  | 1.6   | 6.31E-05 | 0.000767 | ENSMUSG0000003065Xylt1       | protein_codi  | 117380979 | 117673580 | inside       | 100615 | 100449 | shortestDistance |
| chr7 | 117486439 | 117487317 | 879  | 1.98  | 2.99E-06 | 5.94E-05 | ENSMUSG0000003065Xylt1       | protein_codi  | 117380979 | 117673580 | inside       | 105899 | 105460 | shortestDistance |
| chr7 | 117516800 | 117517286 | 487  | 3     | 3.39E-14 | 1.13E-11 | ENSMUSG0000003065Xylt1       | protein_codi  | 117380979 | 117673580 | inside       | 136064 | 135821 | shortestDistance |
| chr7 | 117556768 | 117556136 | 369  | -1.34 | 0.00158  | 0.0102   | ENSMUSG0000003065Xylt1       | protein_codi  | 117380979 | 117673580 | inside       | 174973 | 117444 | shortestDistance |
| chr7 | 117576788 | 117577445 | 658  | 3.04  | 7.20E-11 | 7.01E-09 | ENSMUSG0000003065Xylt1       | protein_codi  | 117380979 | 117673580 | inside       | 196137 | 96135  | shortestDistance |
| chr7 | 117635415 | 117636273 | 859  | -0.95 | 0.00169  | 0.0108   | ENSMUSG0000003065Xylt1       | protein_codi  | 117380979 | 117673580 | inside       | 254865 | 3707   | shortestDistance |
| chr7 | 117795831 | 117796089 | 259  | -1.17 | 0.00344  | 0.0186   | ENSMUSG0000008811Gm24063     | miRNA         | 117776794 | 117776898 | downstream   | 19166  | 18933  | shortestDistance |
| chr7 | 117896524 | 117897090 | 567  | -2.81 | 2.43E-11 | 2.81E-09 | ENSMUSG0000008811Gm24063     | miRNA         | 117776794 | 117776898 | downstream   | 120013 | 119626 | shortestDistance |
| chr7 | 117913918 | 117914287 | 370  | -1.16 | 0.00547  | 0.0267   | ENSMUSG0000008811Gm24063     | miRNA         | 117776794 | 117776898 | downstream   | 137308 | 137020 | shortestDistance |
| chr7 | 118119859 | 118120283 | 425  | -1.39 | 9.63E-05 | 0.00108  | ENSMUSG0000003065Ar1ep1      | protein_codi  | 118118891 | 118129662 | inside       | 9591   | 968    | shortestDistance |
| chr7 | 118703066 | 118703384 | 319  | 1.74  | 2.80E-06 | 5.62E-05 | ENSMUSG0000003391Gde1        | protein_codi  | 118688545 | 118705778 | inside       | 2553   | 2394   | shortestDistance |
| chr7 | 118775558 | 118777979 | 422  | -1.13 | 0.00598  | 0.0286   | ENSMUSG00000030989030624i02F | protein_codi  | 118740226 | 118842966 | inside       | 37542  | 37332  | shortestDistance |
| chr7 | 118811653 | 118812056 | 404  | 2.36  | 1.54E-06 | 3.37E-05 | ENSMUSG00000030989030624i02F | protein_codi  | 118740226 | 118842966 | inside       | 71628  | 30910  | shortestDistance |
| chr7 | 118922438 | 118922859 | 422  | -1.94 | 9.35E-06 | 0.000156 | ENSMUSG00000030783Iqck       | protein_codi  | 118855752 | 118972652 | inside       | 66896  | 49793  | shortestDistance |
| chr7 | 118930020 | 118930322 | 303  | 1.55  | 0.00135  | 0.00904  | ENSMUSG00000030783Iqck       | protein_codi  | 118855752 | 118972652 | inside       | 74419  | 42330  | shortestDistance |
| chr7 | 118976292 | 118977154 | 863  | -1.3  | 5.63E-05 | 0.000696 | ENSMUSG000000873GprC5b       | protein_codi  | 118972047 | 118995211 | inside       | 18488  | 4245   | shortestDistance |
| chr7 | 119418540 | 119419043 | 504  | -1.9  | 5.57E-06 | 0.000101 | ENSMUSG0000003095Gp2         | protein_codi  | 119442537 | 119459285 | downstream   | 40493  | 23494  | shortestDistance |
| chr7 | 119519673 | 119520172 | 500  | -0.93 | 0.00638  | 0.0301   | ENSMUSG0000003097Acm5        | protein_codi  | 119519463 | 119545551 | inside       | 459    | 210    | shortestDistance |
| chr7 | 119861292 | 119862162 | 871  | -1.15 | 0.000253 | 0.00239  | ENSMUSG0000004878Dcun1d3     | protein_codi  | 119852796 | 119896298 | inside       | 34571  | 8496   | shortestDistance |
| chr7 | 119879086 | 119879619 | 534  | 3     | 4.45E-13 | 9.50E-11 | ENSMUSG0000004878Dcun1d3     | protein_codi  | 119852796 | 119896298 | inside       | 16946  | 16679  | shortestDistance |
| chr7 | 119880357 | 119880651 | 295  | 4.26  | 2.06E-12 | 3.37E-10 | ENSMUSG0000004878Dcun1d3     | protein_codi  | 119852796 | 119896298 | inside       | 15794  | 15647  | shortestDistance |
| chr7 | 119977588 | 119977793 | 206  | 1.94  | 0.000279 | 0.00259  | ENSMUSG0000005227DnaH3       | protein_codi  | 119922671 | 120095280 | inside       | 117590 | 54917  | shortestDistance |
| chr7 | 120597628 | 120598340 | 713  | -1.03 | 0.00175  | 0.0111   | ENSMUSG0000004414E130201H02I | processed_g   | 120597625 | 120598475 | inside       | 359    | 3      | shortestDistance |
| chr7 | 120796382 | 120796660 | 279  | -1.3  | 0.00123  | 0.00838  | ENSMUSG0000003088Vwa3a       | protein_codi  | 120739318 | 120805742 | inside       | 57203  | 9082   | shortestDistance |
| chr7 | 120874866 | 120875928 | 1063 | -1.42 | 0.000597 | 0.00475  | ENSMUSG00000008511Gm15774    | antisense_RI  | 120865509 | 120875298 | overlapStart | -99    | 432    | shortestDistance |
| chr7 | 121072451 | 121072849 | 399  | 2.72  | 4.68E-11 | 4.87E-09 | ENSMUSG0000003500Igsf6       | protein_codi  | 121064067 | 121074572 | inside       | 1922   | 1723   | shortestDistance |
| chr7 | 121074254 | 121075104 | 851  | 1.06  | 0.00197  | 0.0121   | ENSMUSG0000003500Igsf6       | protein_codi  | 121064067 | 121074572 | overlapStart | -107   | 318    | shortestDistance |
| chr7 | 121392188 | 121393136 | 949  | 1.26  | 0.00917  | 0.0397   | ENSMUSG0000010835Gm36736     | antisense_RI  | 121314810 | 121393101 | overlapStart | 439    | 35     | shortestDistance |
| chr7 | 121641112 | 121641931 | 820  | -0.94 | 0.00276  | 0.0158   | ENSMUSG0000003051Usp31       | protein_codi  | 121642021 | 121707253 | downstream   | 65731  | 90     | shortestDistance |
| chr7 | 121699364 | 121699590 | 227  | 1.85  | 0.00134  | 0.00899  | ENSMUSG0000006331Usp31       | protein_codi  | 121642021 | 121707253 | inside       | 7776   | 7663   | shortestDistance |
| chr7 | 122000351 | 122000888 | 538  | 2.97  | 1.38E-12 | 2.39E-10 | ENSMUSG0000003087Gga2        | protein_codi  | 121986722 | 122021222 | inside       | 20602  | 13629  | shortestDistance |
| chr7 | 122046827 | 122047229 | 403  | -1.35 | 0.00365  | 0.0195   | ENSMUSG0000003087Ears2       | protein_codi  | 122037213 | 122067263 | inside       | 20235  | 9614   | shortestDistance |
| chr7 | 122081129 | 122081450 | 322  | -2.13 | 3.41E-06 | 6.63E-05 | ENSMUSG0000003087Ubf1d       | protein_codi  | 122067175 | 122082194 | inside       | 14115  | 744    | shortestDistance |
| chr7 | 122256651 | 122257035 | 385  | 2.78  | 1.53E-10 | 1.31E-08 | ENSMUSG0000010870Gm29977     | processed_g   | 122249302 | 122250025 | upstream     | -6818  | 6626   | shortestDistance |
| chr7 | 122258538 | 122258947 | 410  | 1.93  | 1.46E-07 | 4.57E-06 | ENSMUSG0000006453Gm23614     | snRNA         | 122265094 | 122265200 | upstream     | -6352  | 6147   | shortestDistance |
| chr7 | 122260046 | 122260645 | 600  | 1.27  | 0.00144  | 0.0095   |                              |               |           |           |              |        |        |                  |

|      |           |           |      |       |          |          |                              |               |           |           |              |         |        |                  |
|------|-----------|-----------|------|-------|----------|----------|------------------------------|---------------|-----------|-----------|--------------|---------|--------|------------------|
| chr7 | 126746548 | 126747205 | 658  | 1.15  | 0.00332  | 0.0182   | ENSMUSG0000010864Gm44855     | processed_p   | 126749555 | 126749916 | upstream     | -2679   | 2350   | shortestDistance |
| chr7 | 126759247 | 126759688 | 442  | 1.03  | 0.00309  | 0.0172   | ENSMUSG0000006306Mapk3       | protein_codi  | 126759601 | 126765819 | overlapStart | -133    | 87     | shortestDistance |
| chr7 | 126780628 | 126780945 | 318  | 1.09  | 0.00197  | 0.0121   | ENSMUSG0000004267Ype13       | protein_codi  | 126776955 | 126780514 | downstream   | 3831    | 114    | shortestDistance |
| chr7 | 126897974 | 126898490 | 517  | 0.96  | 0.00574  | 0.0277   | ENSMUSG0000006053Tmem219     | protein_codi  | 126886171 | 126922917 | inside       | 24685   | 11803  | shortestDistance |
| chr7 | 127027004 | 127027745 | 742  | 0.92  | 0.0094   | 0.0405   | ENSMUSG0000003067Maz         | protein_codi  | 127022130 | 127027037 | overlapStart | -337    | 33     | shortestDistance |
| chr7 | 127185698 | 127185963 | 266  | 1.66  | 0.000415 | 0.00357  | ENSMUSG0000009290Gm25735     | misc_RNA      | 127191027 | 127191241 | upstream     | -5197   | 5064   | shortestDistance |
| chr7 | 127290193 | 127290607 | 415  | 1.33  | 0.00112  | 0.00782  | ENSMUSG0000010876Gm31897     | lincRNA       | 127287729 | 127290619 | inside       | 2671    | 12     | shortestDistance |
| chr7 | 128050679 | 128051180 | 502  | 1.69  | 1.09E-05 | 0.000177 | ENSMUSG0000010838Gm9299      | processed_p   | 128041251 | 128042390 | upstream     | -8540   | 8289   | shortestDistance |
| chr7 | 128065581 | 128065939 | 359  | 1.35  | 0.000934 | 0.00676  | ENSMUSG0000010859Itgam       | protein_codi  | 128062683 | 128128160 | inside       | 3077    | 2898   | shortestDistance |
| chr7 | 128089178 | 128089726 | 549  | 1.29  | 0.00106  | 0.00747  | ENSMUSG0000010859Itgam       | protein_codi  | 128062683 | 128128160 | inside       | 26769   | 26495  | shortestDistance |
| chr7 | 128133601 | 128134025 | 425  | 1.39  | 0.00032  | 0.00289  | ENSMUSG0000003078Itgax       | protein_codi  | 128129547 | 128150657 | inside       | 4266    | 4054   | shortestDistance |
| chr7 | 128237128 | 128237622 | 495  | 0.89  | 0.0116   | 0.0474   | ENSMUSG0000004217ArmC5       | protein_codi  | 128237342 | 128245100 | overlapStart | 33      | 214    | shortestDistance |
| chr7 | 128344538 | 128345258 | 721  | 1.27  | 0.000348 | 0.0031   | ENSMUSG0000010860Gm6916      | transcribed_1 | 128314784 | 128340805 | downstream   | 30114   | 3733   | shortestDistance |
| chr7 | 128553409 | 128553673 | 265  | -1.4  | 0.000316 | 0.00286  | ENSMUSG0000003084Bag3        | protein_codi  | 128523616 | 128546981 | downstream   | 29925   | 6428   | shortestDistance |
| chr7 | 128570034 | 128570625 | 592  | 2.2   | 3.33E-08 | 1.32E-06 | ENSMUSG0000010879Gm45121     | lincRNA       | 128590926 | 128593343 | downstream   | 23013   | 20301  | shortestDistance |
| chr7 | 128671964 | 128672316 | 353  | 1.19  | 0.0105   | 0.0441   | ENSMUSG0000004210Inpp5f      | protein_codi  | 128611328 | 128696425 | inside       | 61288   | 24109  | shortestDistance |
| chr7 | 128672339 | 128672894 | 556  | 1.24  | 0.00913  | 0.0396   | ENSMUSG0000004210Inpp5f      | protein_codi  | 128611328 | 128696425 | inside       | 61288   | 23531  | shortestDistance |
| chr7 | 128688279 | 128688592 | 314  | -1.23 | 0.00787  | 0.0354   | ENSMUSG0000010706Gm43580     | processed_p   | 128688535 | 128688818 | overlapStart | -99     | 57     | shortestDistance |
| chr7 | 128690062 | 128690523 | 462  | 1.07  | 0.00757  | 0.0343   | ENSMUSG0000004210Inpp5f      | protein_codi  | 128611328 | 128696425 | inside       | 78964   | 5902   | shortestDistance |
| chr7 | 129635801 | 129636388 | 588  | -0.87 | 0.00817  | 0.0364   | ENSMUSG0000004205Wdr11       | protein_codi  | 129591863 | 129635738 | downstream   | 44231   | 63     | shortestDistance |
| chr7 | 129687249 | 129687624 | 376  | -1.09 | 0.00825  | 0.0367   | ENSMUSG0000010848Gm33248     | sense_intron  | 129667405 | 129693400 | inside       | 20031   | 5776   | shortestDistance |
| chr7 | 130325767 | 130326513 | 747  | -1.48 | 8.43E-05 | 0.000966 | ENSMUSG0000003084Gfgr2       | protein_codi  | 130162451 | 133123350 | inside       | 2797210 | 163316 | shortestDistance |
| chr7 | 130363134 | 130363718 | 585  | 2.68  | 3.33E-11 | 3.65E-09 | ENSMUSG0000003085Tacc2       | protein_codi  | 130577438 | 130764785 | inside       | 58988   | 58696  | shortestDistance |
| chr7 | 130657636 | 130658532 | 897  | 1.71  | 3.69E-05 | 0.000492 | ENSMUSG0000003085Tacc2       | protein_codi  | 130577438 | 130764785 | inside       | 80646   | 80198  | shortestDistance |
| chr7 | 130681821 | 130682322 | 502  | -1.03 | 0.00277  | 0.0158   | ENSMUSG0000003085Tacc2       | protein_codi  | 130577438 | 130764785 | inside       | 104634  | 82463  | shortestDistance |
| chr7 | 130757542 | 130757807 | 266  | -1.1  | 0.00986  | 0.042    | ENSMUSG0000003085Tacc2       | protein_codi  | 130577438 | 130764785 | inside       | 180236  | 6978   | shortestDistance |
| chr7 | 130816018 | 130816718 | 701  | 1.34  | 0.000534 | 0.00434  | ENSMUSG0000004029Btdb16      | protein_codi  | 130774069 | 130825899 | inside       | 42299   | 9181   | shortestDistance |
| chr7 | 130839347 | 130840103 | 757  | 2.79  | 1.90E-14 | 6.99E-12 | ENSMUSG0000003084Gfgr2       | protein_codi  | 130162451 | 133123350 | inside       | 2283625 | 676896 | shortestDistance |
| chr7 | 130943149 | 130943986 | 838  | 3.36  | 9.33E-19 | 2.70E-15 | ENSMUSG0000006020Htra1       | protein_codi  | 130936111 | 130985660 | inside       | 7457    | 7038   | shortestDistance |
| chr7 | 132242601 | 132243395 | 795  | 2.08  | 6.62E-09 | 3.27E-07 | ENSMUSG0000003093Cst15       | protein_codi  | 132235780 | 132317228 | inside       | 74230   | 6821   | shortestDistance |
| chr7 | 132347309 | 132348144 | 836  | 1.21  | 0.000408 | 0.00351  | ENSMUSG0000003084Gfgr2       | protein_codi  | 130162451 | 133123350 | inside       | 775624  | 775206 | shortestDistance |
| chr7 | 132358588 | 132359243 | 656  | 0.96  | 0.00508  | 0.0252   | ENSMUSG0000003084Gfgr2       | protein_codi  | 130162451 | 133123350 | inside       | 764434  | 764107 | shortestDistance |
| chr7 | 132380931 | 132381467 | 537  | 0.99  | 0.0106   | 0.0445   | ENSMUSG0000003084Gfgr2       | protein_codi  | 130162451 | 133123350 | inside       | 742151  | 741883 | shortestDistance |
| chr7 | 132465899 | 132466310 | 412  | 2.32  | 2.53E-08 | 1.04E-06 | ENSMUSG0000010884Gm35147     | lincRNA       | 132462012 | 132466661 | inside       | 557     | 351    | shortestDistance |
| chr7 | 132691187 | 132691398 | 212  | 4.02  | 3.63E-11 | 3.92E-09 | ENSMUSG0000003094Lhpp        | protein_codi  | 132610638 | 132706420 | inside       | 80654   | 15022  | shortestDistance |
| chr7 | 132713436 | 132713901 | 466  | 0.94  | 0.0111   | 0.046    | ENSMUSG0000003095Fam53b      | protein_codi  | 132712082 | 132813886 | inside       | 100218  | 1354   | shortestDistance |
| chr7 | 132776421 | 132777004 | 584  | 1.96  | 1.66E-05 | 0.000253 | ENSMUSG0000003095Fam53b      | protein_codi  | 132712082 | 132813886 | inside       | 37174   | 36882  | shortestDistance |
| chr7 | 132898319 | 132898552 | 234  | 3.25  | 1.76E-08 | 7.59E-07 | ENSMUSG0000009759150000219   | processed_tr  | 132874739 | 132931197 | inside       | 32761   | 23580  | shortestDistance |
| chr7 | 133047330 | 133047932 | 603  | 1.06  | 0.0038   | 0.0201   | ENSMUSG0000003084Gfgr2       | protein_codi  | 130162451 | 133123350 | inside       | 75719   | 75418  | shortestDistance |
| chr7 | 133048110 | 133048474 | 365  | 1.07  | 0.00144  | 0.00949  | ENSMUSG0000003084Gfgr2       | protein_codi  | 130162451 | 133123350 | inside       | 75058   | 74876  | shortestDistance |
| chr7 | 133052625 | 133053268 | 644  | 1.49  | 8.22E-06 | 0.00014  | ENSMUSG0000003084Gfgr2       | protein_codi  | 130162451 | 133123350 | inside       | 70044   | 70082  | shortestDistance |
| chr7 | 133123474 | 133124556 | 1083 | 1     | 0.00182  | 0.0115   | ENSMUSG0000003097Ctbp2       | protein_codi  | 132987563 | 133124354 | overlapStart | 339     | 202    | shortestDistance |
| chr7 | 133133623 | 133133895 | 273  | 1.3   | 0.00718  | 0.0329   | ENSMUSG00000109814930483008  | lincRNA       | 133128251 | 133142457 | inside       | 5508    | 5372   | shortestDistance |
| chr7 | 133186252 | 133186683 | 432  | 1.23  | 0.00204  | 0.0125   | ENSMUSG00000109814930483008  | lincRNA       | 133128251 | 133142457 | downstream   | 58217   | 43795  | shortestDistance |
| chr7 | 133683935 | 133684467 | 533  | 1.44  | 0.000227 | 0.00219  | ENSMUSG0000003097Uros        | protein_codi  | 133686243 | 133710072 | downstream   | 25871   | 1776   | shortestDistance |
| chr7 | 133758164 | 133758387 | 224  | 4.46  | 4.78E-08 | 1.78E-06 | ENSMUSG0000003098Dhx32       | protein_codi  | 133720942 | 133782726 | inside       | 24450   | 24339  | shortestDistance |
| chr7 | 133985675 | 133985998 | 324  | 1.63  | 0.0012   | 0.00825  | ENSMUSG0000005455Adam12      | protein_codi  | 133883199 | 134232146 | inside       | 246310  | 102476 | shortestDistance |
| chr7 | 134031788 | 134032292 | 505  | 3.67  | 1.00E-12 | 1.82E-10 | ENSMUSG0000005455Adam12      | protein_codi  | 133883199 | 134232146 | inside       | 200106  | 148589 | shortestDistance |
| chr7 | 134061913 | 134062236 | 324  | 3.67  | 2.69E-09 | 1.50E-07 | ENSMUSG0000005455Adam12      | protein_codi  | 133883199 | 134232146 | inside       | 170072  | 169910 | shortestDistance |
| chr7 | 134062357 | 134063117 | 761  | 3.11  | 6.41E-15 | 2.87E-12 | ENSMUSG0000005455Adam12      | protein_codi  | 133883199 | 134232146 | inside       | 169409  | 169029 | shortestDistance |
| chr7 | 134083412 | 134083741 | 330  | 1.43  | 0.00275  | 0.0157   | ENSMUSG0000005455Adam12      | protein_codi  | 133883199 | 134232146 | inside       | 148570  | 148405 | shortestDistance |
| chr7 | 134669522 | 134670021 | 500  | 1.52  | 1.41E-05 | 0.000221 | ENSMUSG0000005832DocK1       | protein_codi  | 134670654 | 135173639 | upstream     | -882    | 633    | shortestDistance |
| chr7 | 134808410 | 134808817 | 408  | 1.91  | 9.17E-06 | 0.000154 | ENSMUSG0000005832DocK1       | protein_codi  | 134670654 | 135173639 | inside       | 137960  | 137756 | shortestDistance |
| chr7 | 135487491 | 135487776 | 286  | 1.27  | 0.00195  | 0.0121   | ENSMUSG0000010959Gm36356     | lincRNA       | 135486029 | 135491315 | inside       | 1605    | 1462   | shortestDistance |
| chr7 | 135522113 | 135522449 | 337  | 1.62  | 0.000748 | 0.00566  | ENSMUSG0000005086Cln3        | protein_codi  | 135511466 | 135528654 | inside       | 6373    | 6205   | shortestDistance |
| chr7 | 135526613 | 135526915 | 303  | 3.2   | 3.02E-09 | 1.65E-07 | ENSMUSG0000005086Cln3        | protein_codi  | 135511466 | 135528654 | inside       | 1890    | 1739   | shortestDistance |
| chr7 | 135553585 | 135553904 | 320  | 1.14  | 0.00331  | 0.0181   | ENSMUSG0000004183Ptprc       | protein_codi  | 135537481 | 135686293 | inside       | 16263   | 16104  | shortestDistance |
| chr7 | 135556659 | 135557569 | 911  | 1.05  | 0.00328  | 0.018    | ENSMUSG0000004183Ptprc       | protein_codi  | 135537481 | 135686293 | inside       | 19633   | 19178  | shortestDistance |
| chr7 | 135580696 | 135581562 | 867  | 0.96  | 0.0084   | 0.0372   | ENSMUSG0000004183Ptprc       | protein_codi  | 135537481 | 135686293 | inside       | 43648   | 43215  | shortestDistance |
| chr7 | 135588546 | 135589330 | 785  | 1.37  | 0.000149 | 0.00155  | ENSMUSG0000004183Ptprc       | protein_codi  | 135537481 | 135686293 | inside       | 51457   | 51065  | shortestDistance |
| chr7 | 135593813 | 135594216 | 404  | 1.76  | 1.03E-05 | 0.000169 | ENSMUSG0000004183Ptprc       | protein_codi  | 135537481 | 135686293 | inside       | 56533   | 56332  | shortestDistance |
| chr7 | 135615968 | 135616275 | 308  | 2.63  | 3.84E-06 | 7.33E-05 | ENSMUSG0000004183Ptprc       | protein_codi  | 135537481 | 135686293 | inside       | 78641   | 70018  | shortestDistance |
| chr7 | 135644337 | 135644872 | 536  | 3.09  | 2.37E-11 | 2.75E-09 | ENSMUSG00000097475830432E09f | antisense_RI  | 135635931 | 135652314 | inside       | 7710    | 7442   | shortestDistance |
| chr7 | 135666284 | 135666878 | 595  | 2.63  | 3.46E-11 | 3.78E-09 | ENSMUSG0000004183Ptprc       | protein_codi  | 135537481 | 135686293 | inside       | 129100  | 19415  | shortestDistance |
| chr7 | 135667199 | 135667541 | 343  | 1.84  | 6.18E-05 | 0.000754 | ENSMUSG0000004183Ptprc       | protein_codi  | 135537481 | 135686293 | inside       | 129889  | 18752  | shortestDistance |
| chr7 | 135705139 | 135705490 | 352  | 1.41  | 0.00033  | 0.00296  | ENSMUSG0000003100Mk6f7       | protein_codi  | 135689784 | 135716361 | inside       | 11047   | 10871  | shortestDistance |
| chr7 | 135715617 | 135716857 | 1241 | 0.83  | 0.00883  | 0.0386   | ENSMUSG0000003100Mk6f7       | protein_codi  | 135689784 | 135716361 | overlapStart | 124     | 496    | shortestDistance |
| chr7 | 135736308 | 135736722 | 415  | 0.8   | 0.0121   | 0.049    | ENSMUSG0000010983Gm36431     | lincRNA       | 135742676 | 135833187 | upstream     | -6161   | 5954   | shortestDistance |
| chr7 | 135792941 | 135793281 | 341  | 1.05  | 0.00238  | 0.0141   | ENSMUSG0000010983Gm36431     | lincRNA       | 135742676 | 135833187 | inside       | 50435   | 39906  | shortestDistance |
| chr7 | 135794217 | 135794584 | 368  | 2     | 4.07E-07 | 1.10E-05 | ENSMUSG0000010983Gm36431     | lincRNA       | 135742676 | 135833187 | inside       | 51724   | 38603  | shortestDistance |
| chr7 | 135847276 | 135847642 | 367  | 1.48  | 0.000981 | 0.00702  | ENSMUSG0000011007Gm45241     | lincRNA       | 135850708 | 135854448 | downstream   | 6989    | 3066   | shortestDistance |

|      |           |           |      |       |          |          |                   |          |               |           |           |              |        |        |                  |
|------|-----------|-----------|------|-------|----------|----------|-------------------|----------|---------------|-----------|-----------|--------------|--------|--------|------------------|
| chr7 | 140941235 | 140942145 | 911  | 0.8   | 0.00987  | 0.042    | ENSMUSG0000006203 | Pgghg    | protein_codi  | 140941391 | 140947664 | overlapStart | 299    | 156    | shortestDistance |
| chr7 | 140953866 | 140954514 | 649  | 0.85  | 0.0102   | 0.043    | ENSMUSG0000011010 | Gm45717  | protein_codi  | 140949222 | 140955937 | inside       | 1747   | 1423   | shortestDistance |
| chr7 | 140955419 | 140956666 | 1248 | 1.31  | 2.88E-05 | 4.00E-04 | ENSMUSG0000006059 | Iftm2    | protein_codi  | 140954837 | 140955987 | overlapStart | -55    | 568    | shortestDistance |
| chr7 | 140967717 | 140968459 | 743  | 0.89  | 0.0076   | 0.0344   | ENSMUSG0000002549 | Iftm1    | protein_codi  | 140967221 | 140969825 | inside       | 867    | 496    | shortestDistance |
| chr7 | 140981720 | 140982435 | 716  | 1.43  | 0.000281 | 0.0026   | ENSMUSG0000011035 | Gm7514   | processed_p   | 140992580 | 140993513 | downstream   | 11435  | 10145  | shortestDistance |
| chr7 | 140989994 | 140990441 | 448  | 1.44  | 0.000197 | 0.00195  | ENSMUSG0000011035 | Gm7514   | processed_p   | 140992580 | 140993513 | downstream   | 3295   | 2139   | shortestDistance |
| chr7 | 140991141 | 140991458 | 318  | 1.08  | 0.00308  | 0.0172   | ENSMUSG0000011035 | Gm7514   | processed_p   | 140992580 | 140993513 | downstream   | 2213   | 1122   | shortestDistance |
| chr7 | 140997805 | 140998281 | 477  | 1.86  | 5.47E-06 | 9.93E-05 | ENSMUSG0000011035 | Gm7514   | processed_p   | 140992580 | 140993513 | upstream     | -4530  | 4292   | shortestDistance |
| chr7 | 140998805 | 140999789 | 985  | 2.16  | 4.99E-07 | 1.30E-05 | ENSMUSG0000011035 | Gm7514   | processed_p   | 140992580 | 140993513 | upstream     | -5784  | 5292   | shortestDistance |
| chr7 | 141008255 | 141008686 | 432  | 1.99  | 2.27E-06 | 4.69E-05 | ENSMUSG0000002549 | Iftm3    | protein_codi  | 141009586 | 141010770 | downstream   | 2300   | 900    | shortestDistance |
| chr7 | 141016679 | 141017275 | 597  | 2.41  | 5.47E-07 | 1.41E-05 | ENSMUSG0000005910 | Iftm6    | protein_codi  | 141015699 | 141017924 | inside       | 947    | 649    | shortestDistance |
| chr7 | 141021916 | 141022520 | 605  | 3.43  | 1.98E-12 | 3.27E-10 | ENSMUSG0000005910 | Iftm6    | protein_codi  | 141015699 | 141017924 | upstream     | -4294  | 3992   | shortestDistance |
| chr7 | 141046898 | 141047489 | 592  | 1.18  | 0.000781 | 0.00586  | ENSMUSG0000010970 | Gm45299  | transcribed_j | 141051589 | 141053022 | upstream     | -4395  | 4100   | shortestDistance |
| chr7 | 141048282 | 141048643 | 362  | 1.12  | 0.00522  | 0.0257   | ENSMUSG0000010970 | Gm45299  | transcribed_j | 141051589 | 141053022 | upstream     | -3127  | 2946   | shortestDistance |
| chr7 | 141063961 | 141064768 | 808  | 1.8   | 0.000111 | 0.00122  | ENSMUSG0000005562 | B4galnt4 | protein_codi  | 141061104 | 141072400 | inside       | 3260   | 2857   | shortestDistance |
| chr7 | 141069882 | 141070604 | 723  | 1.09  | 0.00379  | 0.0201   | ENSMUSG0000005562 | B4galnt4 | protein_codi  | 141061104 | 141072400 | inside       | 9139   | 1796   | shortestDistance |
| chr7 | 141122884 | 141123605 | 722  | 0.77  | 0.0116   | 0.0475   | ENSMUSG0000002549 | Ptdss2   | protein_codi  | 141122382 | 141157606 | inside       | 862    | 502    | shortestDistance |
| chr7 | 141168513 | 141169044 | 532  | 0.96  | 0.00455  | 0.0232   | ENSMUSG0000003865 | Rnh1     | protein_codi  | 141160326 | 141172857 | inside       | 4079   | 3813   | shortestDistance |
| chr7 | 141194813 | 141195150 | 338  | 0.88  | 0.0108   | 0.0451   | ENSMUSG0000003863 | Lrrc56   | protein_codi  | 141194157 | 141210055 | inside       | 825    | 656    | shortestDistance |
| chr7 | 141394151 | 141394530 | 380  | 1.6   | 5.46E-05 | 0.000679 | ENSMUSG0000002550 | Taldo1   | protein_codi  | 141392199 | 141402968 | inside       | 2141   | 1952   | shortestDistance |
| chr7 | 141394885 | 141395150 | 266  | 1.21  | 0.00187  | 0.0117   | ENSMUSG0000002550 | Taldo1   | protein_codi  | 141392199 | 141402968 | inside       | 2819   | 2686   | shortestDistance |
| chr7 | 141413880 | 141414610 | 731  | 1.19  | 0.00034  | 0.0304   | ENSMUSG0000000510 | Gatd1    | protein_codi  | 141407794 | 141414136 | overlapStart | -109   | 256    | shortestDistance |
| chr7 | 141432277 | 141432581 | 305  | -1.65 | 0.000226 | 0.00218  | ENSMUSG0000001908 | Slc25a22 | protein_codi  | 141429744 | 141437892 | inside       | 5463   | 2533   | shortestDistance |
| chr7 | 141437246 | 141437836 | 591  | 0.84  | 0.00911  | 0.0395   | ENSMUSG0000001908 | Slc25a22 | protein_codi  | 141429744 | 141437892 | inside       | 351    | 56     | shortestDistance |
| chr7 | 141443265 | 141443503 | 239  | 0.98  | 0.00952  | 0.0409   | ENSMUSG0000002550 | Pld1     | protein_codi  | 141438113 | 141444025 | inside       | 641    | 522    | shortestDistance |
| chr7 | 141443882 | 141444213 | 332  | 0.87  | 0.00702  | 0.0324   | ENSMUSG0000002550 | Pld1     | protein_codi  | 141438113 | 141444025 | overlapStart | -23    | 143    | shortestDistance |
| chr7 | 141468579 | 141469187 | 609  | 1.19  | 0.000201 | 0.00198  | ENSMUSG0000002551 | Cd151    | protein_codi  | 141467392 | 141471473 | inside       | 1491   | 1187   | shortestDistance |
| chr7 | 141561730 | 141562429 | 700  | 0.97  | 0.00326  | 0.0179   | ENSMUSG0000000029 | Ap2a2    | protein_codi  | 141562173 | 141633011 | overlapStart | -93    | 256    | shortestDistance |
| chr7 | 142316583 | 142316858 | 276  | 1.99  | 0.000294 | 0.00269  | ENSMUSG0000005775 | Iftm10   | protein_codi  | 142325837 | 142373753 | downstream   | 57033  | 8979   | shortestDistance |
| chr7 | 142394327 | 142394603 | 277  | 1.29  | 0.00108  | 0.00757  | ENSMUSG0000000789 | Ctsd     | protein_codi  | 142375911 | 142388038 | upstream     | -6427  | 6289   | shortestDistance |
| chr7 | 142397996 | 142398456 | 461  | 1.72  | 6.19E-05 | 0.000755 | ENSMUSG0000000789 | Ctsd     | protein_codi  | 142375911 | 142388038 | upstream     | -10188 | 9958   | shortestDistance |
| chr7 | 142399254 | 142399834 | 581  | 1.12  | 0.00285  | 0.0161   | ENSMUSG0000000789 | Ctsd     | protein_codi  | 142375911 | 142388038 | upstream     | -11506 | 11216  | shortestDistance |
| chr7 | 142403665 | 142403974 | 310  | 1.28  | 0.00367  | 0.0196   | ENSMUSG0000000789 | Ctsd     | protein_codi  | 142375911 | 142388038 | upstream     | -15782 | 15627  | shortestDistance |
| chr7 | 142457966 | 142458320 | 355  | 1.18  | 0.00211  | 0.0129   | ENSMUSG0000001881 | Lsp1     | protein_codi  | 142460809 | 142494867 | upstream     | -2666  | 2489   | shortestDistance |
| chr7 | 142598673 | 142599160 | 488  | 3.9   | 8.24E-14 | 2.36E-11 | ENSMUSG0000000924 | Asc12    | protein_codi  | 142966829 | 142969264 | downstream   | 10348  | 7669   | shortestDistance |
| chr7 | 142967357 | 142967840 | 484  | 1.93  | 3.83E-07 | 1.05E-05 | ENSMUSG0000000924 | Asc12    | protein_codi  | 142966829 | 142969264 | inside       | 1666   | 528    | shortestDistance |
| chr7 | 143023404 | 143023906 | 503  | 1.97  | 2.29E-06 | 4.73E-05 | ENSMUSG0000005927 | R74862   | processed_tr  | 143021784 | 143053686 | inside       | 30031  | 1620   | shortestDistance |
| chr7 | 143042831 | 143043340 | 510  | 0.96  | 0.0103   | 0.0435   | ENSMUSG0000005927 | R74862   | processed_tr  | 143021784 | 143053686 | inside       | 10600  | 10346  | shortestDistance |
| chr7 | 143055855 | 143056383 | 529  | 1.17  | 0.0011   | 0.0077   | ENSMUSG0000003770 | Cd81     | protein_codi  | 143052739 | 143067934 | inside       | 3380   | 3116   | shortestDistance |
| chr7 | 143207093 | 143207450 | 358  | 1.83  | 7.52E-05 | 0.000881 | ENSMUSG0000000954 | Kcnk1    | protein_codi  | 143106362 | 143427042 | inside       | 100910 | 100731 | shortestDistance |
| chr7 | 143368289 | 143368580 | 292  | 1.67  | 0.000253 | 0.00239  | ENSMUSG0000000954 | Kcnk1    | protein_codi  | 143106362 | 143427042 | inside       | 262072 | 58462  | shortestDistance |
| chr7 | 143505861 | 143506194 | 334  | 1.11  | 0.00336  | 0.0183   | ENSMUSG0000001076 | Phlda2   | protein_codi  | 143501545 | 143503150 | upstream     | -2878  | 2711   | shortestDistance |
| chr7 | 143506752 | 143507049 | 298  | 1.55  | 3.84E-05 | 0.000508 | ENSMUSG0000001076 | Phlda2   | protein_codi  | 143501545 | 143503150 | upstream     | -3750  | 3602   | shortestDistance |
| chr7 | 144055741 | 144056573 | 833  | 1.45  | 0.000142 | 0.00149  | ENSMUSG0000003754 | Shank2   | protein_codi  | 144001928 | 144424494 | inside       | 54229  | 53813  | shortestDistance |
| chr7 | 144427526 | 144427788 | 263  | 1.72  | 0.0105   | 0.00739  | ENSMUSG0000003754 | Shank2   | protein_codi  | 144001928 | 144424494 | downstream   | 425729 | 3032   | shortestDistance |
| chr7 | 144469599 | 144447725 | 767  | 0.85  | 0.00795  | 0.0356   | ENSMUSG0000003107 | Ctnn     | protein_codi  | 144435733 | 144471009 | inside       | 23667  | 11226  | shortestDistance |
| chr7 | 144630483 | 144631039 | 557  | -0.95 | 0.011    | 0.0457   | ENSMUSG0000003107 | Ctnn     | protein_codi  | 144588549 | 144751974 | inside       | 121213 | 41934  | shortestDistance |
| chr7 | 144768942 | 144769924 | 983  | 1.58  | 1.87E-05 | 0.000279 | ENSMUSG0000010900 | Gm44929  | lincRNA       | 144764763 | 144770571 | inside       | 4670   | 647    | shortestDistance |
| chr7 | 144779708 | 144780164 | 457  | 1.21  | 0.00099  | 0.00707  | ENSMUSG0000010944 | Gm34964  | lincRNA       | 144787041 | 144791808 | downstream   | 11872  | 6877   | shortestDistance |
| chr7 | 144932425 | 144932726 | 302  | 1.65  | 0.000482 | 0.00402  | ENSMUSG0000007034 | Cncd1    | protein_codi  | 144929931 | 144939925 | inside       | 7349   | 2494   | shortestDistance |
| chr7 | 144931788 | 144992177 | 390  | 2.05  | 9.15E-06 | 0.000153 | ENSMUSG0000007034 | Cncd1    | protein_codi  | 144929931 | 144939925 | upstream     | -52057 | 51863  | shortestDistance |
| chr7 | 145018166 | 145018607 | 442  | 2.52  | 2.31E-08 | 9.61E-07 | ENSMUSG0000007034 | Cncd1    | protein_codi  | 144929931 | 144939925 | upstream     | -78461 | 78241  | shortestDistance |
| chr7 | 145029607 | 145029980 | 374  | 1.82  | 8.66E-06 | 0.000146 | ENSMUSG0000007034 | Cncd1    | protein_codi  | 144929931 | 144939925 | upstream     | -89869 | 89682  | shortestDistance |
| chr7 | 145110679 | 145111037 | 359  | 1.06  | 0.00168  | 0.0107   | ENSMUSG0000010896 | Gm45181  | lincRNA       | 145162996 | 145166957 | upstream     | -52138 | 51959  | shortestDistance |
| chr7 | 145112230 | 145112785 | 556  | 1.21  | 0.00168  | 0.0108   | ENSMUSG0000010896 | Gm45181  | lincRNA       | 145162996 | 145166957 | upstream     | -50488 | 50211  | shortestDistance |
| chr7 | 145182307 | 145182770 | 464  | 0.99  | 0.0102   | 0.043    | ENSMUSG0000004867 | Ptnc2    | protein_codi  | 145186524 | 145284011 | downstream   | 101473 | 3754   | shortestDistance |
| chr7 | 145210540 | 145210843 | 304  | 3.14  | 7.04E-09 | 3.44E-07 | ENSMUSG0000004867 | Ptnc2    | protein_codi  | 145186524 | 145284011 | inside       | 73319  | 24016  | shortestDistance |
| chr7 | 145215482 | 145215890 | 409  | 3.19  | 1.52E-10 | 1.31E-08 | ENSMUSG0000004867 | Ptnc2    | protein_codi  | 145186524 | 145284011 | inside       | 68325  | 28958  | shortestDistance |
| chr7 | 3232611   | 3233028   | 418  | 2.31  | 1.49E-07 | 4.65E-06 | ENSMUSG0000000553 | Insr     | protein_codi  | 3122061   | 3279617   | inside       | 46797  | 46589  | shortestDistance |
| chr8 | 3285654   | 3289163   | 600  | 3.59  | 1.09E-16 | 1.15E-13 | ENSMUSG0000000553 | Insr     | protein_codi  | 3122061   | 3279617   | upstream     | -9247  | 8407   | shortestDistance |
| chr8 | 3483620   | 3483970   | 551  | -2.13 | 0.000112 | 0.00122  | ENSMUSG0000004034 | Tex45    | protein_codi  | 3470862   | 3487181   | inside       | 12933  | 3211   | shortestDistance |
| chr8 | 3606524   | 3607074   | 551  | -1.11 | 0.00281  | 0.016    | ENSMUSG0000004443 | Camsap3  | protein_codi  | 3587293   | 3609075   | inside       | 19506  | 2001   | shortestDistance |
| chr8 | 3608517   | 3609670   | 1154 | -1.29 | 0.000937 | 0.00678  | ENSMUSG0000001947 | Kab2     | protein_codi  | 3608421   | 3621316   | inside       | 12222  | 96     | shortestDistance |
| chr8 | 3627093   | 3627398   | 306  | -1.01 | 0.00469  | 0.0237   | ENSMUSG0000008768 | Pet100   | protein_codi  | 3621548   | 3625848   | downstream   | 5698   | 1245   | shortestDistance |
| chr8 | 3646305   | 3646291   | 987  | 1.24  | 0.000537 | 0.00436  | ENSMUSG0000000462 | Stxbp2   | protein_codi  | 3630955   | 3643644   | downstream   | 17843  | 4661   | shortestDistance |
| chr8 | 3664384   | 3664857   | 474  | 1.02  | 0.00188  | 0.0117   | ENSMUSG0000001397 | Mcmep1   | protein_codi  | 3665754   | 3669259   | upstream     | -1134  | 897    | shortestDistance |
| chr8 | 3711254   | 3712421   | 1168 | -1.03 | 0.000551 | 0.00445  | ENSMUSG0000008995 | Gm16553  | antisense_RI  | 3709804   | 3739044   | inside       | 2034   | 1450   | shortestDistance |
| chr8 | 3718571   | 3718934   | 364  | -0.79 | 0.0115   | 0.0473   | ENSMUSG0000007449 | Clec4g   | protein_codi  | 3707064   | 3720651   | inside       | 1899   | 1717   | shortestDistance |
| chr8 | 3754330   | 3754797   | 468  | 1.31  | 0.000302 | 0.00275  | ENSMUSG0000003149 | Cd209a   | protein_codi  | 3743397   | 3748984   | upstream     | -5580  | 5346   | shortestDistance |
| chr8 | 3939558   | 3940468   | 511  | -1.19 | 0.00478  | 0.024    | ENSMUSG0000004016 | Cd209c   | protein_codi  | 3940222   | 3954746   | overlapEnd   | 14533  | 246    | shortestDistance |
| chr8 | 3944115   | 3944477   |      |       |          |          |                   |          |               |           |           |              |        |        |                  |

|      |          |          |      |       |          |          |                    |             |               |          |          |              |        |        |                  |
|------|----------|----------|------|-------|----------|----------|--------------------|-------------|---------------|----------|----------|--------------|--------|--------|------------------|
| chr8 | 8653383  | 8654164  | 782  | -1.32 | 0.000659 | 0.00514  | ENSMUSG00000000130 | Efnb2       | protein_codi  | 8617434  | 8661242  | inside       | 7468   | 7078   | shortestDistance |
| chr8 | 8658875  | 8659172  | 298  | -1.31 | 0.00137  | 0.00914  | ENSMUSG00000000130 | Efnb2       | protein_codi  | 8617434  | 8661242  | inside       | 2218   | 2070   | shortestDistance |
| chr8 | 8704735  | 8705138  | 404  | -1.12 | 0.00287  | 0.0162   | ENSMUSG00000010911 | Gm18393     | processed_p   | 8711484  | 8712614  | upstream     | -6548  | 6346   | shortestDistance |
| chr8 | 8733879  | 8734157  | 279  | -0.99 | 0.00611  | 0.0291   | ENSMUSG00000010937 | Gm44626     | lincRNA       | 8727111  | 8853647  | inside       | 6907   | 6768   | shortestDistance |
| chr8 | 8807253  | 8807483  | 231  | -1.02 | 0.0114   | 0.0468   | ENSMUSG00000010937 | Gm44626     | lincRNA       | 8727111  | 8853647  | inside       | 80257  | 46164  | shortestDistance |
| chr8 | 8842387  | 8842844  | 458  | -1.68 | 5.63E-05 | 0.000696 | ENSMUSG00000010937 | Gm44626     | lincRNA       | 8727111  | 8853647  | inside       | 115505 | 10803  | shortestDistance |
| chr8 | 8858848  | 8859152  | 305  | -1.47 | 0.000202 | 0.00199  | ENSMUSG00000010937 | Gm44626     | lincRNA       | 8727111  | 8853647  | downstream   | 131889 | 5201   | shortestDistance |
| chr8 | 8867088  | 8867776  | 689  | -1.84 | 8.48E-06 | 0.000144 | ENSMUSG00000010937 | Gm44626     | lincRNA       | 8727111  | 8853647  | downstream   | 140321 | 13441  | shortestDistance |
| chr8 | 8867829  | 8868293  | 465  | -1.41 | 0.00012  | 0.00129  | ENSMUSG00000010937 | Gm44626     | lincRNA       | 8727111  | 8853647  | downstream   | 140950 | 14182  | shortestDistance |
| chr8 | 8906166  | 8906622  | 457  | -1.61 | 2.63E-05 | 0.000371 | ENSMUSG00000010934 | Gm44515     | lincRNA       | 8920937  | 8932699  | downstream   | 26305  | 14315  | shortestDistance |
| chr8 | 8958983  | 8959572  | 590  | -1.14 | 0.00336  | 0.0183   | ENSMUSG00000010934 | Gm44515     | lincRNA       | 8920937  | 8932699  | upstream     | -26579 | 26284  | shortestDistance |
| chr8 | 8968962  | 8969990  | 1029 | -1.19 | 0.000686 | 0.0053   | ENSMUSG00000010934 | Gm44515     | lincRNA       | 8920937  | 8932699  | upstream     | -36777 | 36263  | shortestDistance |
| chr8 | 8984661  | 8985774  | 1114 | -0.99 | 0.00298  | 0.0167   | ENSMUSG00000010934 | Gm44515     | lincRNA       | 8920937  | 8932699  | upstream     | -52519 | 51962  | shortestDistance |
| chr8 | 8988618  | 8988905  | 288  | -1.27 | 0.00142  | 0.0094   | ENSMUSG00000010934 | Gm44515     | lincRNA       | 8920937  | 8932699  | upstream     | -56063 | 55919  | shortestDistance |
| chr8 | 8993979  | 8994360  | 382  | -2.09 | 4.74E-07 | 1.25E-05 | ENSMUSG00000010934 | Gm44515     | lincRNA       | 8920937  | 8932699  | upstream     | -61471 | 61280  | shortestDistance |
| chr8 | 8994606  | 8995156  | 551  | -0.95 | 0.00458  | 0.0233   | ENSMUSG00000010934 | Gm44515     | lincRNA       | 8920937  | 8932699  | upstream     | -62182 | 61907  | shortestDistance |
| chr8 | 9096058  | 9096441  | 384  | -1.06 | 0.0081   | 0.0362   | ENSMUSG00000010884 | 4933430N04  | processed_tr  | 9125412  | 9132291  | downstream   | 36041  | 28971  | shortestDistance |
| chr8 | 9157149  | 9157840  | 692  | -1.47 | 4.58E-06 | 8.52E-05 | ENSMUSG00000010912 | Gm44516     | lincRNA       | 9152600  | 9157221  | overlapStart | -273   | 72     | shortestDistance |
| chr8 | 9167901  | 9168242  | 342  | -1.07 | 0.0066   | 0.0309   | ENSMUSG00000010906 | Gm39128     | lincRNA       | 9167517  | 9174793  | inside       | 555    | 384    | shortestDistance |
| chr8 | 9222004  | 9222356  | 333  | -1.01 | 0.00841  | 0.0372   | ENSMUSG00000007915 | Fam155a     | protein_codi  | 9205902  | 9771161  | inside       | 548971 | 16122  | shortestDistance |
| chr8 | 9227708  | 9228259  | 552  | -0.98 | 0.00642  | 0.0302   | ENSMUSG00000007915 | Fam155a     | protein_codi  | 9205902  | 9771161  | inside       | 543177 | 21806  | shortestDistance |
| chr8 | 9233169  | 9233831  | 663  | -1.02 | 0.00493  | 0.0246   | ENSMUSG00000007915 | Fam155a     | protein_codi  | 9205902  | 9771161  | inside       | 537661 | 27267  | shortestDistance |
| chr8 | 9455026  | 9455551  | 526  | -1.94 | 1.12E-07 | 3.66E-06 | ENSMUSG00000007915 | Fam155a     | protein_codi  | 9205902  | 9771161  | inside       | 315873 | 249124 | shortestDistance |
| chr8 | 9479686  | 9480105  | 420  | -1.28 | 0.000429 | 0.00366  | ENSMUSG00000007915 | Fam155a     | protein_codi  | 9205902  | 9771161  | inside       | 291265 | 273784 | shortestDistance |
| chr8 | 9571967  | 9572423  | 457  | 3.86  | 7.38E-13 | 1.42E-10 | ENSMUSG00000007915 | Fam155a     | protein_codi  | 9205902  | 9771161  | inside       | 198966 | 198738 | shortestDistance |
| chr8 | 9580256  | 9580559  | 304  | -1.14 | 0.00578  | 0.0278   | ENSMUSG00000007915 | Fam155a     | protein_codi  | 9205902  | 9771161  | inside       | 190753 | 190602 | shortestDistance |
| chr8 | 10006283 | 10006943 | 661  | 2.08  | 4.11E-08 | 1.56E-06 | ENSMUSG00000003149 | Tnfrsf13b   | protein_codi  | 10006467 | 10039072 | overlapStart | 146    | 184    | shortestDistance |
| chr8 | 10139543 | 10139979 | 437  | -1.85 | 2.99E-06 | 5.93E-05 | ENSMUSG00000003905 | Myo16       | protein_codi  | 10153911 | 10634742 | upstream     | -14150 | 13932  | shortestDistance |
| chr8 | 10217158 | 10217471 | 314  | -1.41 | 0.00195  | 0.0121   | ENSMUSG00000003905 | Myo16       | protein_codi  | 10153911 | 10634742 | inside       | 63403  | 63247  | shortestDistance |
| chr8 | 10292655 | 10292929 | 275  | -2.49 | 2.44E-08 | 1.01E-06 | ENSMUSG00000003905 | Myo16       | protein_codi  | 10153911 | 10634742 | inside       | 138881 | 138744 | shortestDistance |
| chr8 | 10562152 | 10562467 | 316  | 1.43  | 0.000817 | 0.00609  | ENSMUSG00000003905 | Myo16       | protein_codi  | 10153911 | 10634742 | inside       | 408399 | 72275  | shortestDistance |
| chr8 | 10633005 | 10633929 | 625  | -1.12 | 0.00129  | 0.00871  | ENSMUSG00000003905 | Myo16       | protein_codi  | 10153911 | 10634742 | inside       | 479706 | 813    | shortestDistance |
| chr8 | 10764403 | 10764250 | 248  | 1.72  | 0.000439 | 0.00373  | ENSMUSG00000003912 | Gm39129     | lincRNA       | 10738890 | 10770849 | inside       | 25236  | 6599   | shortestDistance |
| chr8 | 10827602 | 10827893 | 292  | -1.17 | 0.00235  | 0.014    | ENSMUSG00000009625 | Rps16-ps3   | processed_p   | 10808688 | 10809128 | upstream     | -18620 | 18474  | shortestDistance |
| chr8 | 10971559 | 10972038 | 480  | -1.14 | 0.0101   | 0.0428   | ENSMUSG00000010950 | Gm44956     | lincRNA       | 10962957 | 10970814 | upstream     | -984   | 745    | shortestDistance |
| chr8 | 10977692 | 10978046 | 355  | -2.02 | 5.25E-06 | 9.59E-05 | ENSMUSG00000003889 | Irs2        | protein_codi  | 10984681 | 11008458 | downstream   | 30589  | 6635   | shortestDistance |
| chr8 | 11001166 | 11001599 | 434  | -0.98 | 0.00435  | 0.0224   | ENSMUSG00000003889 | Irs2        | protein_codi  | 10984681 | 11008458 | inside       | 7076   | 6859   | shortestDistance |
| chr8 | 11016115 | 11016505 | 391  | 3.17  | 2.09E-09 | 1.22E-07 | ENSMUSG00000009693 | 9530052E02  | processed_tr  | 11007850 | 11054541 | inside       | 8460   | 8265   | shortestDistance |
| chr8 | 11038834 | 11039241 | 408  | 2.01  | 1.20E-06 | 2.74E-05 | ENSMUSG00000009693 | 9530052E02  | processed_tr  | 11007850 | 11054541 | inside       | 31188  | 15300  | shortestDistance |
| chr8 | 11168726 | 11169146 | 421  | 2.93  | 5.63E-09 | 2.82E-07 | ENSMUSG00000008557 | Gm15418     | antisense_RI  | 11187755 | 11204503 | upstream     | -18819 | 18609  | shortestDistance |
| chr8 | 11173308 | 11173770 | 463  | -1.13 | 0.00591  | 0.0283   | ENSMUSG00000008557 | Gm15418     | antisense_RI  | 11187755 | 11204503 | upstream     | -14216 | 13985  | shortestDistance |
| chr8 | 11249673 | 11250527 | 855  | 1.56  | 0.00113  | 0.00788  | ENSMUSG00000003150 | Col4a1      | protein_codi  | 11198423 | 11312826 | inside       | 62726  | 51250  | shortestDistance |
| chr8 | 11403739 | 11404360 | 622  | 2.55  | 5.18E-09 | 2.63E-07 | ENSMUSG00000007846 | Gm15419     | antisense_RI  | 11399186 | 11417892 | inside       | 13842  | 4553   | shortestDistance |
| chr8 | 11411720 | 11412025 | 306  | 2.41  | 5.60E-05 | 0.000694 | ENSMUSG00000008478 | Gm15419     | antisense_RI  | 11399186 | 11417892 | inside       | 6020   | 5867   | shortestDistance |
| chr8 | 11430628 | 11431298 | 671  | 1.22  | 0.00321  | 0.0177   | ENSMUSG00000003150 | Col4a2      | protein_codi  | 11312805 | 11449287 | inside       | 181158 | 17989  | shortestDistance |
| chr8 | 11452471 | 11453365 | 895  | 1.09  | 0.00117  | 0.00806  | ENSMUSG00000003150 | Rab20       | protein_codi  | 11453518 | 11478710 | downstream   | 25792  | 153    | shortestDistance |
| chr8 | 11517372 | 11517822 | 451  | 3.04  | 1.09E-09 | 6.96E-08 | ENSMUSG00000005622 | Cars2       | protein_codi  | 11513977 | 11550783 | inside       | 33186  | 3395   | shortestDistance |
| chr8 | 11585591 | 11586549 | 959  | -1.1  | 0.00295  | 0.0166   | ENSMUSG00000004596 | Ing1        | protein_codi  | 11555571 | 11563251 | downstream   | 30499  | 22340  | shortestDistance |
| chr8 | 11616344 | 11616669 | 326  | 1.03  | 0.00825  | 0.0367   | ENSMUSG00000003150 | Ankrd10     | protein_codi  | 11611583 | 11635757 | inside       | 19251  | 4761   | shortestDistance |
| chr8 | 11767329 | 11767940 | 612  | 2.25  | 5.83E-07 | 1.48E-05 | ENSMUSG00000003151 | Arhgef7     | protein_codi  | 11727721 | 11835219 | inside       | 39913  | 39608  | shortestDistance |
| chr8 | 11808069 | 11808443 | 375  | 4.01  | 3.80E-11 | 4.08E-09 | ENSMUSG00000003151 | Arhgef7     | protein_codi  | 11727721 | 11835219 | inside       | 80535  | 26776  | shortestDistance |
| chr8 | 11889499 | 11890005 | 507  | -0.93 | 0.00486  | 0.0244   | ENSMUSG00000010977 | Gm39132     | lincRNA       | 11874159 | 11894113 | inside       | 15593  | 4108   | shortestDistance |
| chr8 | 11999752 | 12000042 | 291  | -1.09 | 0.00607  | 0.0289   | ENSMUSG00000010999 | B020031H02  | lincRNA       | 11948339 | 12000216 | inside       | 51558  | 174    | shortestDistance |
| chr8 | 12279420 | 12280204 | 785  | -1.16 | 0.00163  | 0.0105   | ENSMUSG00000007447 | A230072I06F | protein_codi  | 12278819 | 12280657 | inside       | 993    | 453    | shortestDistance |
| chr8 | 12703490 | 12704027 | 538  | 2.95  | 5.43E-10 | 3.82E-08 | ENSMUSG00000007446 | Gm15348     | lincRNA       | 12706944 | 12719127 | downstream   | 15369  | 2917   | shortestDistance |
| chr8 | 12711507 | 12712100 | 531  | 3.13  | 4.57E-13 | 9.67E-11 | ENSMUSG00000007446 | Gm15348     | lincRNA       | 12706944 | 12719127 | inside       | 7292   | 4626   | shortestDistance |
| chr8 | 12930441 | 12930868 | 428  | -1.2  | 0.00248  | 0.0145   | ENSMUSG00000003144 | Mcfl2       | protein_codi  | 12873806 | 13020905 | inside       | 56848  | 56635  | shortestDistance |
| chr8 | 12955393 | 12956278 | 886  | 2.03  | 1.22E-06 | 2.78E-05 | ENSMUSG00000003144 | Mcfl2       | protein_codi  | 12873806 | 13020905 | inside       | 82030  | 64627  | shortestDistance |
| chr8 | 12983980 | 12984493 | 514  | 2.28  | 1.73E-05 | 0.000262 | ENSMUSG00000003144 | Mcfl2       | protein_codi  | 12873806 | 13020905 | inside       | 110430 | 36412  | shortestDistance |
| chr8 | 13027610 | 13028009 | 400  | 2.36  | 8.43E-07 | 2.03E-05 | ENSMUSG00000003144 | F7          | protein_codi  | 13026034 | 13035809 | inside       | 1776   | 1576   | shortestDistance |
| chr8 | 13028440 | 13028999 | 560  | 3.04  | 5.05E-10 | 3.58E-08 | ENSMUSG00000003144 | F7          | protein_codi  | 13026034 | 13035809 | inside       | 2686   | 2406   | shortestDistance |
| chr8 | 13036251 | 13036909 | 659  | 1.8   | 0.000243 | 0.00231  | ENSMUSG00000003144 | F10         | protein_codi  | 13037308 | 13056676 | upstream     | -728   | 399    | shortestDistance |
| chr8 | 13037053 | 13037754 | 702  | 2.24  | 1.60E-05 | 0.000245 | ENSMUSG00000003144 | F10         | protein_codi  | 13037308 | 13056676 | overlapStart | 96     | 255    | shortestDistance |
| chr8 | 13039067 | 13039421 | 355  | 1.59  | 0.000175 | 0.00177  | ENSMUSG00000003144 | F10         | protein_codi  | 13037308 | 13056676 | inside       | 1936   | 1759   | shortestDistance |
| chr8 | 13075084 | 13075399 | 316  | 2.31  | 6.11E-07 | 1.54E-05 | ENSMUSG00000003144 | Proz        | protein_codi  | 13060914 | 13076026 | inside       | 14328  | 627    | shortestDistance |
| chr8 | 13113213 | 13113683 | 471  | -1.79 | 2.04E-06 | 4.28E-05 | ENSMUSG00000003144 | Cul4a       | protein_codi  | 13105621 | 13147940 | inside       | 7827   | 7592   | shortestDistance |
| chr8 | 13122838 | 13123171 | 334  | 1.97  | 0.0038   | 0.0201   | ENSMUSG00000003144 | Cul4a       | protein_codi  | 13105621 | 13147940 | inside       | 17383  | 17217  | shortestDistance |
| chr8 | 13208661 | 13209190 | 530  | -1.05 | 0.00962  | 0.0412   | ENSMUSG00000009933 | 2810030D12  | bidirectional | 13200720 | 13207714 | downstream   | 8206   | 947    | shortestDistance |
| chr8 | 13353227 | 13353782 | 556  | 1.78  | 2.95E-06 | 5.87E-05 | ENSMUSG00000003848 | Tfdp1       | protein_codi  | 13338751 | 13378448 | inside       | 14753  | 14476  | shortestDistance |
| chr8 | 13472156 | 13472751 | 596  | -1.64 | 0.000118 | 0.00128  | ENSMUSG00000003145 | Gas6        | protein_codi  | 13465374 | 13494490 | inside       | 22036  | 6782   | shortestDistance |
| chr8 | 13506822 | 13507294 | 473  | -1.11 | 0.00252  | 0.0147   |                    |             |               |          |          |              |        |        |                  |

|      |          |          |      |       |          |            |                            |               |          |          |              |        |        |                  |
|------|----------|----------|------|-------|----------|------------|----------------------------|---------------|----------|----------|--------------|--------|--------|------------------|
| chr8 | 19978934 | 19979234 | 301  | -1.31 | 0.000158 | 0.00163    | ENSMUSG0000011064Gm40466   | unprocessed   | 20001099 | 20008736 | upstream     | -22015 | 21865  | shortestDistance |
| chr8 | 19979779 | 19980689 | 911  | -1.05 | 0.000585 | 0.00468    | ENSMUSG0000011064Gm40466   | unprocessed   | 20001099 | 20008736 | upstream     | -20865 | 20410  | shortestDistance |
| chr8 | 20908162 | 20908641 | 480  | 1.28  | 0.000209 | 0.00205    | ENSMUSG0000008297Gm15056   | protein_codi  | 20906066 | 20902627 | upstream     | -5775  | 5535   | shortestDistance |
| chr8 | 21955348 | 21955650 | 303  | -0.97 | 0.0113   | 0.0466     | ENSMUSG0000007911Fam90a1a  | protein_codi  | 21958714 | 21964303 | upstream     | -3215  | 3064   | shortestDistance |
| chr8 | 21992222 | 21992691 | 470  | -1.35 | 0.000227 | 0.00219    | ENSMUSG0000000656Atp7b     | protein_codi  | 21992785 | 22060305 | downstream   | 67849  | 94     | shortestDistance |
| chr8 | 22059728 | 22060089 | 362  | -1    | 0.00245  | 0.0144     | ENSMUSG0000000656Atp7b     | protein_codi  | 21992785 | 22060305 | inside       | 397    | 216    | shortestDistance |
| chr8 | 22079292 | 22079953 | 662  | 1.59  | 0.000233 | 0.00223    | ENSMUSG0000000373Nek5      | protein_codi  | 22073616 | 22125053 | inside       | 45431  | 5676   | shortestDistance |
| chr8 | 22124196 | 22125266 | 1071 | -1.03 | 0.000969 | 0.00696    | ENSMUSG0000000373Nek5      | protein_codi  | 22073616 | 22125053 | overlapStart | 322    | 213    | shortestDistance |
| chr8 | 22209044 | 22209778 | 735  | -1.24 | 0.00248  | 0.0145     | ENSMUSG00000003147Vps36    | protein_codi  | 22192809 | 22220843 | inside       | 16602  | 11065  | shortestDistance |
| chr8 | 22262315 | 22262701 | 387  | 2.91  | 7.24E-10 | 4.92E-08   | ENSMUSG00000003148Ths1     | protein_codi  | 22227313 | 22261334 | downstream   | 35195  | 981    | shortestDistance |
| chr8 | 22266837 | 22267104 | 268  | 3.77  | 9.00E-10 | 5.98E-08   | ENSMUSG00000003148Ths1     | protein_codi  | 22227313 | 22261334 | downstream   | 39657  | 5503   | shortestDistance |
| chr8 | 22376759 | 22377300 | 542  | -0.84 | 0.00905  | 0.0393     | ENSMUSG00000003148Slc25a15 | protein_codi  | 22375551 | 22398597 | inside       | 21567  | 1208   | shortestDistance |
| chr8 | 22414004 | 22414597 | 594  | -1.04 | 0.0034   | 0.0185     | ENSMUSG00000003153Mrps31   | protein_codi  | 22411361 | 22429665 | inside       | 2939   | 2643   | shortestDistance |
| chr8 | 22491990 | 22492384 | 395  | 1.49  | 0.000261 | 0.00245    | ENSMUSG00000003765Slc20a2  | protein_codi  | 22476788 | 22569612 | inside       | 15399  | 15202  | shortestDistance |
| chr8 | 22713071 | 22713430 | 360  | -0.98 | 0.0109   | 0.0454     | ENSMUSG00000003153Ikbkbb   | protein_codi  | 22659212 | 22706589 | upstream     | -6661  | 6482   | shortestDistance |
| chr8 | 22787513 | 22787939 | 427  | -0.94 | 0.00629  | 0.0297     | ENSMUSG00000003153Ap3m2    | protein_codi  | 22787354 | 22805622 | inside       | 17896  | 159    | shortestDistance |
| chr8 | 22878137 | 22878640 | 504  | 1.46  | 0.00759  | 0.0344     | ENSMUSG00000003154Kat6a    | protein_codi  | 22859535 | 22943259 | inside       | 18853  | 18602  | shortestDistance |
| chr8 | 23024418 | 23024808 | 391  | -1.03 | 0.00526  | 0.0259     | ENSMUSG00000003154Ank1     | protein_codi  | 22974844 | 23150497 | inside       | 49769  | 49574  | shortestDistance |
| chr8 | 23034951 | 23035621 | 671  | -0.86 | 0.0115   | 0.0472     | ENSMUSG00000003154Ank1     | protein_codi  | 22974844 | 23150497 | inside       | 60442  | 60107  | shortestDistance |
| chr8 | 23058010 | 23058546 | 537  | -1.03 | 0.0016   | 0.0444     | ENSMUSG00000003154Ank1     | protein_codi  | 22974844 | 23150497 | inside       | 83434  | 83166  | shortestDistance |
| chr8 | 23122011 | 23122399 | 389  | -1.2  | 0.0014   | 0.00932    | ENSMUSG00000003154Ank1     | protein_codi  | 22974844 | 23150497 | inside       | 147361 | 28098  | shortestDistance |
| chr8 | 23157303 | 23158465 | 1163 | -0.91 | 0.00704  | 0.0325     | ENSMUSG00000006367Nkx6-3   | protein_codi  | 23153269 | 23158948 | inside       | 4615   | 483    | shortestDistance |
| chr8 | 23166218 | 23167268 | 1051 | -1.44 | 0.000581 | 0.00465    | ENSMUSG00000003154Gpat4    | protein_codi  | 23171265 | 23208346 | downstream   | 41603  | 3997   | shortestDistance |
| chr8 | 23411123 | 23411977 | 855  | -1.65 | 0.000329 | 0.00296    | ENSMUSG00000003154Sfrp1    | protein_codi  | 23411502 | 23449632 | overlapStart | 48     | 379    | shortestDistance |
| chr8 | 23606066 | 23606382 | 317  | -1.05 | 0.00679  | 0.0316     | ENSMUSG00000003745Zmat4    | protein_codi  | 23636019 | 24156585 | upstream     | -29795 | 29637  | shortestDistance |
| chr8 | 23645826 | 23646541 | 716  | -1.66 | 4.33E-07 | 1.16E-05   | ENSMUSG00000003745Zmat4    | protein_codi  | 23636019 | 24156585 | inside       | 10165  | 9807   | shortestDistance |
| chr8 | 23669449 | 23669803 | 355  | -1.36 | 0.000951 | 0.00686    | ENSMUSG00000003745Zmat4    | protein_codi  | 23636019 | 24156585 | inside       | 33607  | 33430  | shortestDistance |
| chr8 | 23886559 | 23886929 | 371  | -1.25 | 0.00467  | 0.0236     | ENSMUSG00000003745Zmat4    | protein_codi  | 23636019 | 24156585 | inside       | 250725 | 250540 | shortestDistance |
| chr8 | 24386467 | 24386786 | 320  | -1.08 | 0.0032   | 0.0177     | ENSMUSG0000010914Gm30692   | lincRNA       | 24412179 | 24416937 | upstream     | -25553 | 25393  | shortestDistance |
| chr8 | 24420413 | 24420660 | 248  | -1.87 | 2.14E-05 | 0.000312   | ENSMUSG0000009765Gm26714   | antisense_RI  | 24422404 | 24440008 | upstream     | -1868  | 1744   | shortestDistance |
| chr8 | 24427559 | 24427995 | 437  | -2.1  | 2.59E-07 | 7.50E-06   | ENSMUSG0000009765Gm26714   | antisense_RI  | 24422404 | 24440008 | inside       | 5373   | 5155   | shortestDistance |
| chr8 | 24437821 | 24438083 | 263  | -1.63 | 3.04E-05 | 0.000419   | ENSMUSG00000005631Tcm      | protein_codi  | 24437180 | 24438984 | inside       | 1032   | 641    | shortestDistance |
| chr8 | 24438315 | 24439445 | 1131 | -1.9  | 5.28E-07 | 1.37E-05   | ENSMUSG00000005631Tcm      | protein_codi  | 24437180 | 24438984 | overlapStart | 104    | 461    | shortestDistance |
| chr8 | 24546232 | 24546594 | 363  | -0.92 | 0.00776  | 0.035      | ENSMUSG00000003154Ido2     | protein_codi  | 24531892 | 24576333 | inside       | 29920  | 14340  | shortestDistance |
| chr8 | 24554279 | 24554921 | 643  | -0.99 | 0.00686  | 0.0318     | ENSMUSG00000003154Ido2     | protein_codi  | 24531892 | 24576333 | inside       | 21733  | 21412  | shortestDistance |
| chr8 | 24595114 | 24596060 | 947  | -1    | 0.00138  | 0.00919    | ENSMUSG00000003155Ido1     | protein_codi  | 24584136 | 24597009 | inside       | 1422   | 949    | shortestDistance |
| chr8 | 24605353 | 24605705 | 353  | -1.51 | 7.27E-05 | 0.000858   | ENSMUSG00000003155Adam18   | protein_codi  | 24602246 | 24674755 | inside       | 69226  | 3107   | shortestDistance |
| chr8 | 24606488 | 24606975 | 488  | -1.58 | 6.94E-05 | 0.000828   | ENSMUSG00000003155Adam18   | protein_codi  | 24602246 | 24674755 | inside       | 68023  | 4242   | shortestDistance |
| chr8 | 24948229 | 24948467 | 239  | -1.22 | 0.00916  | 0.0397     | ENSMUSG00000003743Adam32   | protein_codi  | 24836140 | 24948804 | inside       | 456    | 337    | shortestDistance |
| chr8 | 25027646 | 25028384 | 739  | -1.73 | 0.000442 | 0.00375    | ENSMUSG00000003740Htra4    | protein_codi  | 25024929 | 25038962 | inside       | 10947  | 2717   | shortestDistance |
| chr8 | 25034641 | 25034942 | 302  | 0.98  | 0.0118   | 0.0481     | ENSMUSG00000003740Htra4    | protein_codi  | 25024929 | 25038962 | inside       | 4170   | 4020   | shortestDistance |
| chr8 | 25067929 | 25068592 | 664  | 1.08  | 0.00841  | 0.0372     | ENSMUSG00000003155Plekha2  | protein_codi  | 25039144 | 25102376 | inside       | 34116  | 28785  | shortestDistance |
| chr8 | 25087502 | 25087916 | 415  | 1.21  | 0.000998 | 0.00713    | ENSMUSG00000003155Plekha2  | protein_codi  | 25039144 | 25102376 | inside       | 14667  | 14460  | shortestDistance |
| chr8 | 25156111 | 25156630 | 520  | 2.58  | 4.42E-09 | 2.29E-07   | ENSMUSG0000000695Tacc1     | protein_codi  | 25154552 | 25256588 | inside       | 100218 | 1559   | shortestDistance |
| chr8 | 25198509 | 25198948 | 440  | 1.05  | 0.00174  | 0.011      | ENSMUSG0000000695Tacc1     | protein_codi  | 25154552 | 25256588 | inside       | 57860  | 4397   | shortestDistance |
| chr8 | 25238157 | 25238461 | 305  | 1.06  | 0.0106   | 0.0443     | ENSMUSG0000000695Tacc1     | protein_codi  | 25154552 | 25256588 | inside       | 18279  | 18127  | shortestDistance |
| chr8 | 25353800 | 25354528 | 729  | -0.87 | 0.0105   | 0.0441     | ENSMUSG0000011017Gm39147   | transcribed_1 | 25399020 | 25427436 | upstream     | -44856 | 44492  | shortestDistance |
| chr8 | 25429910 | 25430393 | 484  | -1.31 | 0.00215  | 0.013      | ENSMUSG0000011011Gm30978   | lincRNA       | 25415119 | 25429224 | upstream     | -928   | 686    | shortestDistance |
| chr8 | 25535254 | 25535816 | 563  | -1.13 | 0.00476  | 0.024      | ENSMUSG00000003156Fgf1     | protein_codi  | 25513654 | 25575718 | inside       | 21881  | 21600  | shortestDistance |
| chr8 | 25653960 | 25654252 | 293  | 1.18  | 0.00853  | 0.0376     | ENSMUSG00000005482Nsd3     | protein_codi  | 25601601 | 25719667 | inside       | 52505  | 52359  | shortestDistance |
| chr8 | 25715270 | 25715642 | 373  | 3.82  | 6.18E-12 | 8.77E-10   | ENSMUSG00000005482Nsd3     | protein_codi  | 25601601 | 25719667 | inside       | 113855 | 4025   | shortestDistance |
| chr8 | 25980239 | 25980605 | 367  | 2.58  | 4.00E-09 | 2.11E-07   | ENSMUSG00000003745Pomk     | protein_codi  | 25980604 | 25994133 | overlapEnd   | 13711  | 1      | shortestDistance |
| chr8 | 26380669 | 26381038 | 370  | -1.55 | 0.000471 | 0.00394    | ENSMUSG0000010968Gm45307   | lincRNA       | 26298634 | 26354163 | downstream   | 82220  | 26506  | shortestDistance |
| chr8 | 26384268 | 26384683 | 416  | -1.89 | 0.00177  | 0.0112     | ENSMUSG0000010968Gm45307   | lincRNA       | 26298634 | 26354163 | downstream   | 85842  | 30105  | shortestDistance |
| chr8 | 26596603 | 26597293 | 691  | 1.64  | 2.34E-05 | 0.000337   | ENSMUSG0000011022Gm39149   | lincRNA       | 26560461 | 26579802 | upstream     | -17146 | 16801  | shortestDistance |
| chr8 | 26689820 | 26690446 | 627  | 1.39  | 0.000318 | 0.00287    | ENSMUSG0000010968Gm32098   | lincRNA       | 26665893 | 26668306 | upstream     | -21827 | 21514  | shortestDistance |
| chr8 | 26697594 | 26697946 | 353  | 1.38  | 0.000994 | 0.0071     | ENSMUSG0000010968Gm32098   | lincRNA       | 26665893 | 26668306 | upstream     | -29464 | 29288  | shortestDistance |
| chr8 | 26770338 | 26770986 | 649  | -1.12 | 0.00127  | 0.00862    | ENSMUSG0000011029Gm45647   | processed_p   | 26780315 | 26780509 | upstream     | -9653  | 9329   | shortestDistance |
| chr8 | 26844866 | 26845782 | 917  | -0.9  | 0.00735  | 0.0335     | ENSMUSG0000011033Gm0008N11 | lincRNA       | 26814593 | 26884380 | inside       | 39056  | 30273  | shortestDistance |
| chr8 | 26879535 | 26879820 | 286  | 2.08  | 9.62E-06 | 0.00016    | ENSMUSG0000010033Gm0008N11 | lincRNA       | 26814593 | 26884380 | inside       | 4702   | 4550   | shortestDistance |
| chr8 | 26883757 | 26884142 | 386  | -1.33 | 0.000401 | 0.00347    | ENSMUSG0000010033Gm0008N11 | lincRNA       | 26814593 | 26884380 | inside       | 430    | 238    | shortestDistance |
| chr8 | 26914281 | 26914620 | 340  | -1.25 | 0.00309  | 0.0172     | ENSMUSG0000010033Gm0008N11 | lincRNA       | 26814593 | 26884380 | upstream     | -30070 | 29901  | shortestDistance |
| chr8 | 27200830 | 27201146 | 317  | -1.26 | 0.00171  | 0.0109     | ENSMUSG00000003972Got1l1   | protein_codi  | 27197459 | 27223828 | inside       | 22840  | 3371   | shortestDistance |
| chr8 | 27202137 | 27202419 | 283  | -1.23 | 0.00041  | 0.00353    | ENSMUSG00000003972Got1l1   | protein_codi  | 27197459 | 27223828 | inside       | 21550  | 4678   | shortestDistance |
| chr8 | 27206349 | 27206809 | 461  | -1.03 | 0.00299  | 0.0167     | ENSMUSG00000003972Got1l1   | protein_codi  | 27197459 | 27223828 | inside       | 17249  | 8890   | shortestDistance |
| chr8 | 27253697 | 27254048 | 352  | -1    | 0.00252  | 0.0147     | ENSMUSG000000031148Adb3    | protein_codi  | 27225776 | 27250616 | upstream     | -3256  | 3081   | shortestDistance |
| chr8 | 27264216 | 27264503 | 288  | -0.88 | 0.0107   | 0.0447     | ENSMUSG00000003156Eif4ebp1 | protein_codi  | 27260329 | 27276674 | inside       | 4031   | 3887   | shortestDistance |
| chr8 | 27679194 | 27679510 | 317  | -1.28 | 7.41E-05 | 0.000871   | ENSMUSG000001033Gm45861    | protein_codi  | 27447100 | 27620917 | downstream   | 232252 | 58277  | shortestDistance |
| chr8 | 28673220 | 28673764 | 545  | 1.3   | 8.00E-04 | 0.00598    | ENSMUSG00000006362Unc5d    | protein_codi  | 28646717 | 29219636 | inside       | 546144 | 26503  | shortestDistance |
| chr8 | 29789091 | 29789498 | 408  | -1.73 | 0.000482 | 0.00402    | ENSMUSG0000010959Gm45492   | processed_p   | 30081673 | 30081960 | downstream   | 292666 | 292175 | shortestDistance |
| chr8 | 29789898 | 29790386 | 489  | -1.72 | 4.68E-05 | 0.000598   | ENSMUSG0000010959Gm45492   | processed_p   | 30081673 | 30081960 | downstream   | 291818 | 291287 | shortestDistance |
| chr8 | 29836051 | 29836590 | 540  | -2.26 | 8.25E-09 | 3.94E-07   | ENSMUSG0000010959Gm45492   | processed_p   | 30081673 | 30081960 | downstream   | 245640 | 245083 | shortestDistance |
| chr8 | 30915685 | 30916773 | 1089 | -2.06 | 1.26E-07 | 4.03E-06</ |                            |               |          |          |              |        |        |                  |

|      |          |          |      |       |          |          |                    |            |               |          |          |              |        |        |                  |
|------|----------|----------|------|-------|----------|----------|--------------------|------------|---------------|----------|----------|--------------|--------|--------|------------------|
| chr8 | 33602973 | 33603221 | 249  | -0.99 | 0.00587  | 0.0282   | ENSMUSG0000000963  | Ppp2cb     | protein_codi  | 33599625 | 33619441 | inside       | 3472   | 3348   | shortestDistance |
| chr8 | 33628995 | 33629351 | 357  | 1.27  | 0.00351  | 0.0189   | ENSMUSG0000000529  | Ubnx8      | protein_codi  | 33619586 | 33641967 | inside       | 12794  | 9409   | shortestDistance |
| chr8 | 33673407 | 33674342 | 936  | 4.04  | 4.23E-15 | 2.05E-12 | ENSMUSG0000000315  | Gsr        | protein_codi  | 33652523 | 33698163 | inside       | 21351  | 20884  | shortestDistance |
| chr8 | 33855772 | 33856087 | 316  | 2.43  | 2.23E-06 | 4.63E-05 | ENSMUSG0000000315  | Rbpm5      | protein_codi  | 33782643 | 33929863 | inside       | 73933  | 73129  | shortestDistance |
| chr8 | 34044865 | 34045180 | 316  | 1.18  | 0.00323  | 0.0178   | ENSMUSG0000000546  | Gm9951     | lincRNA       | 34049262 | 34057046 | upstream     | -4240  | 4082   | shortestDistance |
| chr8 | 34065145 | 34065741 | 597  | 1.81  | 2.25E-05 | 0.000325 | ENSMUSG0000000546  | Gm9951     | lincRNA       | 34049262 | 34057046 | downstream   | 16181  | 8099   | shortestDistance |
| chr8 | 34539313 | 34539674 | 362  | 2.11  | 1.06E-05 | 0.000173 | ENSMUSG0000011001  | Gm33968    | lincRNA       | 34523318 | 34526628 | downstream   | 16176  | 12685  | shortestDistance |
| chr8 | 34600798 | 34601346 | 549  | 2.61  | 7.79E-08 | 2.69E-06 | ENSMUSG0000010981  | B930018H19 | lincRNA       | 34589420 | 34640316 | inside       | 39244  | 11378  | shortestDistance |
| chr8 | 34622616 | 34623148 | 533  | 1.37  | 9.67E-05 | 0.00108  | ENSMUSG0000010981  | B930018H19 | lincRNA       | 34589420 | 34640316 | inside       | 17434  | 17168  | shortestDistance |
| chr8 | 34843468 | 34843802 | 335  | -1.24 | 0.0031   | 0.0172   | ENSMUSG0000000315  | Tnks       | protein_codi  | 34826460 | 34965690 | inside       | 122055 | 17008  | shortestDistance |
| chr8 | 34878637 | 34878993 | 357  | 1.52  | 0.00158  | 0.0102   | ENSMUSG0000000315  | Tnks       | protein_codi  | 34826460 | 34965690 | inside       | 86875  | 52177  | shortestDistance |
| chr8 | 34918445 | 34918883 | 439  | 2.07  | 1.44E-07 | 4.51E-06 | ENSMUSG0000000315  | Tnks       | protein_codi  | 34826460 | 34965690 | inside       | 47026  | 46807  | shortestDistance |
| chr8 | 34945054 | 34945765 | 712  | 1.1   | 0.00148  | 0.0097   | ENSMUSG0000000315  | Tnks       | protein_codi  | 34826460 | 34965690 | inside       | 20280  | 19925  | shortestDistance |
| chr8 | 35135647 | 35136026 | 380  | 1.83  | 0.00049  | 0.00407  | ENSMUSG0000000971  | Rpl31-ps23 | processed_g   | 35132995 | 35133532 | upstream     | -2304  | 2115   | shortestDistance |
| chr8 | 35206244 | 35206641 | 398  | 1.17  | 0.00205  | 0.0126   | ENSMUSG0000010977  | Gm34474    | lincRNA       | 35218638 | 35222071 | upstream     | -12196 | 11997  | shortestDistance |
| chr8 | 35218310 | 35218913 | 604  | -1.23 | 0.000563 | 0.00453  | ENSMUSG0000010977  | Gm34474    | lincRNA       | 35218638 | 35222071 | overlapStart | -26    | 275    | shortestDistance |
| chr8 | 35366571 | 35366962 | 392  | 1.62  | 2.75E-05 | 0.000385 | ENSMUSG0000010969  | Gm54669    | bidirectional | 35367750 | 35376392 | downstream   | 9626   | 788    | shortestDistance |
| chr8 | 35393478 | 35393791 | 314  | 2.87  | 1.19E-08 | 5.44E-07 | ENSMUSG0000004679  | Ppp1r3b    | protein_codi  | 35375739 | 35388139 | downstream   | 17895  | 5339   | shortestDistance |
| chr8 | 35394105 | 35394495 | 391  | 1.91  | 6.84E-05 | 0.000818 | ENSMUSG0000004679  | Ppp1r3b    | protein_codi  | 35375739 | 35388139 | downstream   | 18561  | 5966   | shortestDistance |
| chr8 | 35725266 | 35725504 | 239  | 1.23  | 0.00848  | 0.0374   | ENSMUSG0000010971  | Gm35021    | processed_tr  | 35724175 | 35757517 | inside       | 12210  | 1091   | shortestDistance |
| chr8 | 35735524 | 35735798 | 275  | -2.06 | 1.65E-06 | 3.58E-05 | ENSMUSG0000010971  | Gm35021    | processed_tr  | 35724175 | 35757517 | inside       | 11486  | 11349  | shortestDistance |
| chr8 | 35765370 | 35766064 | 695  | -1.08 | 0.00465  | 0.0235   | ENSMUSG0000010937  | Gm19410    | protein_codi  | 35765790 | 35818047 | overlapStart | -73    | 274    | shortestDistance |
| chr8 | 35837378 | 35837844 | 467  | -1.02 | 0.0124   | 0.0497   | ENSMUSG0000005597  | Cldn23     | protein_codi  | 35824712 | 35826559 | upstream     | -11052 | 10819  | shortestDistance |
| chr8 | 35850318 | 35850930 | 613  | -0.89 | 0.012    | 0.0489   | ENSMUSG0000010976  | 5430403N17 | lincRNA       | 35864085 | 35882957 | downstream   | 32333  | 13155  | shortestDistance |
| chr8 | 36028394 | 36029050 | 657  | 1.1   | 0.00305  | 0.017    | ENSMUSG00000009818 | Rps12-ps24 | processed_g   | 36025753 | 36026133 | downstream   | 2969   | 2261   | shortestDistance |
| chr8 | 36094124 | 36094934 | 271  | -1.06 | 0.00663  | 0.031    | ENSMUSG00000005027 | Prag1      | protein_codi  | 36094828 | 36147787 | upstream     | -569   | 434    | shortestDistance |
| chr8 | 36265311 | 36265568 | 238  | 2.91  | 2.49E-09 | 1.41E-07 | ENSMUSG00000003963 | Lonr1f     | protein_codi  | 36216064 | 36249516 | upstream     | -15934 | 15815  | shortestDistance |
| chr8 | 36267330 | 36268439 | 1110 | 2.07  | 1.90E-08 | 8.14E-07 | ENSMUSG00000003963 | Lonr1f     | protein_codi  | 36216064 | 36249516 | upstream     | -18368 | 17814  | shortestDistance |
| chr8 | 36361309 | 36361593 | 285  | -1.15 | 0.00242  | 0.0143   | ENSMUSG00000009815 | Gm5787     | processed_g   | 36372596 | 36373633 | downstream   | 12182  | 11003  | shortestDistance |
| chr8 | 36361882 | 36362157 | 276  | -1.25 | 0.00701  | 0.0323   | ENSMUSG00000009815 | Gm5787     | processed_g   | 36372596 | 36373633 | downstream   | 11613  | 10439  | shortestDistance |
| chr8 | 36494865 | 36495537 | 673  | -1.66 | 5.42E-05 | 0.000675 | ENSMUSG00000003962 | 6430573F11 | protein_codi  | 36457548 | 36516570 | inside       | 37653  | 21033  | shortestDistance |
| chr8 | 36527969 | 36528344 | 376  | -1.01 | 0.00654  | 0.0307   | ENSMUSG00000003962 | 6430573F11 | protein_codi  | 36457548 | 36516570 | downstream   | 70608  | 11399  | shortestDistance |
| chr8 | 36538527 | 36538782 | 256  | -1.59 | 0.00054  | 0.00438  | ENSMUSG00000003962 | 6430573F11 | protein_codi  | 36457548 | 36516570 | downstream   | 81106  | 21957  | shortestDistance |
| chr8 | 36567940 | 36568338 | 399  | -1.3  | 0.00231  | 0.0138   | ENSMUSG00000003152 | Dcl1       | protein_codi  | 36567751 | 36593143 | inside       | 385004 | 189    | shortestDistance |
| chr8 | 36577866 | 36578396 | 531  | -1.32 | 0.000167 | 0.00171  | ENSMUSG00000003152 | Dcl1       | protein_codi  | 36567751 | 36593143 | inside       | 375012 | 10115  | shortestDistance |
| chr8 | 36588287 | 36588827 | 541  | -1.09 | 0.00265  | 0.0153   | ENSMUSG00000003152 | Dcl1       | protein_codi  | 36567751 | 36593143 | inside       | 364586 | 20536  | shortestDistance |
| chr8 | 36685360 | 36685767 | 408  | 0.97  | 0.00771  | 0.0348   | ENSMUSG00000003152 | Dcl1       | protein_codi  | 36567751 | 36593143 | inside       | 267579 | 117609 | shortestDistance |
| chr8 | 36732480 | 36733106 | 627  | -1.14 | 0.00389  | 0.0205   | ENSMUSG00000003152 | Dcl1       | protein_codi  | 36567751 | 36593143 | inside       | 220350 | 164729 | shortestDistance |
| chr8 | 36879544 | 36879878 | 335  | -1.37 | 0.000778 | 0.00585  | ENSMUSG00000003152 | Dcl1       | protein_codi  | 36567751 | 36593143 | inside       | 73432  | 73425  | shortestDistance |
| chr8 | 36951945 | 36952751 | 807  | -1.69 | 1.49E-06 | 3.28E-05 | ENSMUSG00000003152 | Dcl1       | protein_codi  | 36567751 | 36593143 | inside       | 795    | 392    | shortestDistance |
| chr8 | 36990338 | 36994476 | 1439 | -0.92 | 0.00196  | 0.0121   | ENSMUSG00000003478 | A429214    | protein_codi  | 36993604 | 36995533 | overlapStart | 153    | 566    | shortestDistance |
| chr8 | 37063683 | 37064139 | 457  | -1.03 | 0.00293  | 0.0165   | ENSMUSG0000010981  | Gm10683    | TEC           | 37088936 | 37090309 | downstream   | 26398  | 24797  | shortestDistance |
| chr8 | 37073060 | 37073241 | 236  | -1.55 | 0.000601 | 0.00478  | ENSMUSG0000010981  | Gm10683    | TEC           | 37088936 | 37090309 | downstream   | 17185  | 15695  | shortestDistance |
| chr8 | 37131968 | 37132369 | 402  | -1.2  | 0.00314  | 0.0174   | ENSMUSG0000011028  | Gm45524    | lincRNA       | 37097018 | 37188061 | inside       | 35150  | 34950  | shortestDistance |
| chr8 | 38287159 | 38287624 | 466  | 1.33  | 0.0015   | 0.00978  | ENSMUSG00000003953 | Gsgz       | protein_codi  | 37522298 | 38661508 | inside       | 374116 | 373884 | shortestDistance |
| chr8 | 38342198 | 38342887 | 690  | 2     | 1.41E-07 | 4.43E-06 | ENSMUSG00000003953 | Gsgz       | protein_codi  | 37522298 | 38661508 | inside       | 318966 | 318621 | shortestDistance |
| chr8 | 38659956 | 38660985 | 1030 | -1.76 | 4.40E-08 | 1.65E-06 | ENSMUSG0000011023  | Gm40493    | antisense_RI  | 38659763 | 38671066 | inside       | 707    | 193    | shortestDistance |
| chr8 | 38661158 | 38661750 | 593  | -2.16 | 3.30E-09 | 1.79E-07 | ENSMUSG00000003953 | Gsgz       | protein_codi  | 37522298 | 38661508 | overlapStart | 54     | 242    | shortestDistance |
| chr8 | 38818227 | 38818511 | 285  | -1.14 | 0.00709  | 0.0326   | ENSMUSG0000011023  | Gm40493    | antisense_RI  | 38659763 | 38671066 | downstream   | 158606 | 147161 | shortestDistance |
| chr8 | 39005480 | 39006555 | 1076 | -0.77 | 0.00985  | 0.042    | ENSMUSG00000003953 | Tusc3      | protein_codi  | 39005845 | 39165114 | overlapStart | 173    | 365    | shortestDistance |
| chr8 | 39020247 | 39021041 | 795  | -1.55 | 5.98E-07 | 1.52E-05 | ENSMUSG00000003953 | Tusc3      | protein_codi  | 39005845 | 39165114 | inside       | 14799  | 14402  | shortestDistance |
| chr8 | 39031396 | 39031935 | 540  | -1.9  | 1.71E-08 | 7.39E-07 | ENSMUSG00000003953 | Tusc3      | protein_codi  | 39005845 | 39165114 | inside       | 25821  | 25551  | shortestDistance |
| chr8 | 39045333 | 39046144 | 812  | -1.23 | 0.000265 | 0.00248  | ENSMUSG00000003953 | Tusc3      | protein_codi  | 39005845 | 39165114 | inside       | 39893  | 39488  | shortestDistance |
| chr8 | 39058955 | 39059227 | 273  | -1.78 | 7.44E-07 | 1.83E-05 | ENSMUSG00000003953 | Tusc3      | protein_codi  | 39005845 | 39165114 | inside       | 53246  | 53110  | shortestDistance |
| chr8 | 39059847 | 39060574 | 728  | -1.59 | 3.36E-07 | 9.38E-06 | ENSMUSG00000003953 | Tusc3      | protein_codi  | 39005845 | 39165114 | inside       | 54365  | 54002  | shortestDistance |
| chr8 | 39108229 | 39108719 | 491  | -1.45 | 0.00034  | 0.00304  | ENSMUSG00000003953 | Tusc3      | protein_codi  | 39005845 | 39165114 | inside       | 106229 | 56395  | shortestDistance |
| chr8 | 39950455 | 39952523 | 329  | -2.32 | 3.31E-06 | 6.48E-05 | ENSMUSG0000010981  | Gm7082     | processed_g   | 40016714 | 40018248 | upstream     | -61625 | 61461  | shortestDistance |
| chr8 | 39960645 | 39960695 | 321  | -1.51 | 0.000415 | 0.00356  | ENSMUSG0000010981  | Gm7082     | processed_g   | 40016714 | 40018248 | upstream     | -55909 | 55749  | shortestDistance |
| chr8 | 40132924 | 40133271 | 348  | -1.19 | 0.000752 | 0.00569  | ENSMUSG0000010981  | Gm7082     | processed_g   | 40016714 | 40018248 | downstream   | 116384 | 114676 | shortestDistance |
| chr8 | 40150914 | 40151561 | 648  | -1.7  | 2.15E-06 | 4.49E-05 | ENSMUSG00000003160 | Fgf120     | protein_codi  | 40279166 | 40308331 | downstream   | 157093 | 127605 | shortestDistance |
| chr8 | 40286004 | 40286722 | 719  | -1.44 | 0.000619 | 0.00489  | ENSMUSG00000003160 | Fgf120     | protein_codi  | 40279166 | 40308331 | inside       | 21968  | 6838   | shortestDistance |
| chr8 | 40296472 | 40296777 | 306  | -1.17 | 0.00164  | 0.0105   | ENSMUSG00000003160 | Fgf120     | protein_codi  | 40279166 | 40308331 | inside       | 11707  | 11554  | shortestDistance |
| chr8 | 40307300 | 40308724 | 1425 | -0.90 | 0.00194  | 0.012    | ENSMUSG00000003947 | Micu3      | protein_codi  | 40307458 | 40386308 | overlapStart | 554    | 158    | shortestDistance |
| chr8 | 40381402 | 40381718 | 317  | -1.21 | 0.000764 | 0.00576  | ENSMUSG00000003947 | Micu3      | protein_codi  | 40307458 | 40386308 | inside       | 74102  | 4590   | shortestDistance |
| chr8 | 40387924 | 40388296 | 373  | 2.78  | 2.60E-11 | 2.97E-09 | ENSMUSG00000003947 | Micu3      | protein_codi  | 40307458 | 40386308 | downstream   | 80652  | 1616   | shortestDistance |
| chr8 | 40388385 | 40388845 | 461  | 3.18  | 3.18E-14 | 1.07E-11 | ENSMUSG00000003947 | Micu3      | protein_codi  | 40307458 | 40386308 | downstream   | 81157  | 2077   | shortestDistance |
| chr8 | 40418103 | 40418414 | 312  | -1.2  | 0.000797 | 0.00596  | ENSMUSG00000003947 | Zdhc2      | protein_codi  | 40423815 | 40510268 | upstream     | -5557  | 5401   | shortestDistance |
| chr8 | 40449334 | 40449596 | 263  | -1.31 | 0.000949 | 0.00685  | ENSMUSG00000003947 | Zdhc2      | protein_codi  | 40423815 | 40510268 | inside       | 25650  | 25519  | shortestDistance |
| chr8 | 40517819 | 40518231 | 413  | 2.24  | 1.88E-07 | 5.72E-06 | ENSMUSG00000003160 | Vps37a     | protein_codi  | 40511783 | 40551134 | inside       | 6242   | 6036   | shortestDistance |
| chr8 | 40604800 | 40605133 | 334  | 1.66  | 0.000975 | 0.00699  | ENSMUSG00000003943 | Mtmr7      | protein_codi  | 40551095 | 40634797 | inside       | 29831  | 29664  | shortestDistance |
| chr8 | 40634441 | 40634999 | 559  | -1.19 |          |          |                    |            |               |          |          |              |        |        |                  |

|      |           |           |      |       |          |          |                    |             |              |          |           |              |         |        |                  |
|------|-----------|-----------|------|-------|----------|----------|--------------------|-------------|--------------|----------|-----------|--------------|---------|--------|------------------|
| chr8 | 45541991  | 45542596  | 606  | -1.22 | 0.00495  | 0.0247   | ENSMUSG00000003162 | Sorbs2      | protein_codi | 45507788 | 45827906  | inside       | 34506   | 34203  | shortestDistance |
| chr8 | 45627344  | 45628319  | 976  | -2.19 | 1.48E-11 | 0.000426 | ENSMUSG00000003162 | Sorbs2      | protein_codi | 45507788 | 45827906  | inside       | 120044  | 119556 | shortestDistance |
| chr8 | 45660613  | 45660967  | 355  | -2.13 | 3.10E-05 | 0.000426 | ENSMUSG00000003162 | Sorbs2      | protein_codi | 45507788 | 45827906  | inside       | 153002  | 152825 | shortestDistance |
| chr8 | 45763631  | 45764354  | 724  | -1.48 | 5.74E-05 | 0.000709 | ENSMUSG00000008544 | Sorbs2os    | antisense_RI | 45723325 | 45819297  | inside       | 55305   | 40306  | shortestDistance |
| chr8 | 45796292  | 45796766  | 475  | -1.33 | 0.000406 | 0.00351  | ENSMUSG00000008544 | Sorbs2os    | antisense_RI | 45723325 | 45819297  | inside       | 22768   | 22531  | shortestDistance |
| chr8 | 45817025  | 45817551  | 527  | -0.87 | 0.00888  | 0.0388   | ENSMUSG00000008544 | Sorbs2os    | antisense_RI | 45723325 | 45819297  | inside       | 2009    | 1746   | shortestDistance |
| chr8 | 45884640  | 45884918  | 279  | -1.73 | 2.09E-05 | 0.000307 | ENSMUSG00000003163 | Pdlm3       | protein_codi | 45885461 | 45919548  | upstream     | -682    | 543    | shortestDistance |
| chr8 | 45885181  | 45885653  | 473  | -1.33 | 0.000168 | 0.00171  | ENSMUSG00000003163 | Pdlm3       | protein_codi | 45885461 | 45919548  | overlapStart | -44     | 192    | shortestDistance |
| chr8 | 45889735  | 45890169  | 435  | -1.52 | 1.36E-05 | 0.000214 | ENSMUSG00000003163 | Pdlm3       | protein_codi | 45885461 | 45919548  | inside       | 4491    | 4274   | shortestDistance |
| chr8 | 46078530  | 46079263  | 734  | -1.65 | 0.000116 | 0.00126  | ENSMUSG00000003825 | Snx25       | protein_codi | 46033261 | 46152159  | inside       | 73263   | 45269  | shortestDistance |
| chr8 | 46137893  | 46138629  | 737  | 1.43  | 2.10E-05 | 0.000308 | ENSMUSG00000003825 | Snx25       | protein_codi | 46033261 | 46152159  | inside       | 13898   | 13530  | shortestDistance |
| chr8 | 46143933  | 46144279  | 347  | -1.29 | 0.00175  | 0.0111   | ENSMUSG00000003825 | Snx25       | protein_codi | 46033261 | 46152159  | inside       | 8053    | 7880   | shortestDistance |
| chr8 | 46216814  | 46217414  | 601  | -1.51 | 1.86E-05 | 0.000277 | ENSMUSG00000003163 | C52ca4      | protein_codi | 46206797 | 462211284 | upstream     | -5830   | 5530   | shortestDistance |
| chr8 | 46281558  | 46281919  | 362  | -0.97 | 0.00702  | 0.0324   | ENSMUSG0000010969  | Gm8575      | processed_g  | 46279672 | 46280192  | downstream   | 2066    | 1366   | shortestDistance |
| chr8 | 46311190  | 46311586  | 397  | -0.9  | 0.0083   | 0.0368   | ENSMUSG0000011017  | Gm39168     | lincRNA      | 46299131 | 46325674  | inside       | 12257   | 12059  | shortestDistance |
| chr8 | 46480556  | 46480796  | 241  | -1.81 | 0.000393 | 0.00342  | ENSMUSG00000001879 | Acs1        | protein_codi | 46471037 | 46536051  | inside       | 9639    | 9519   | shortestDistance |
| chr8 | 46482873  | 46483153  | 281  | 1.82  | 0.000119 | 0.00129  | ENSMUSG00000001879 | Acs1        | protein_codi | 46471037 | 46536051  | inside       | 11976   | 11836  | shortestDistance |
| chr8 | 46508371  | 46509280  | 910  | -1.18 | 0.000156 | 0.00161  | ENSMUSG00000001879 | Acs1        | protein_codi | 46471037 | 46536051  | inside       | 37789   | 26771  | shortestDistance |
| chr8 | 46533893  | 46534381  | 489  | 5.13  | 6.18E-15 | 2.78E-12 | ENSMUSG00000001879 | Acs1        | protein_codi | 46471037 | 46536051  | inside       | 63100   | 1670   | shortestDistance |
| chr8 | 46569657  | 46569985  | 329  | -1.81 | 1.42E-05 | 0.000222 | ENSMUSG00000003162 | Cenpu       | protein_codi | 46552028 | 46580007  | inside       | 17793   | 10022  | shortestDistance |
| chr8 | 46600931  | 46601269  | 339  | -1.6  | 0.000158 | 0.00163  | ENSMUSG00000003822 | Primpol     | protein_codi | 46575594 | 46617212  | inside       | 16112   | 15943  | shortestDistance |
| chr8 | 46628601  | 46629059  | 459  | 1.23  | 0.00074  | 0.00562  | ENSMUSG00000003162 | Cas3        | protein_codi | 46617291 | 46639689  | inside       | 11539   | 10630  | shortestDistance |
| chr8 | 466811245 | 466811719 | 475  | 1.72  | 0.000137 | 0.00145  | ENSMUSG00000003162 | Hf2         | protein_codi | 46739732 | 46847458  | inside       | 71750   | 35739  | shortestDistance |
| chr8 | 46920943  | 46921482  | 540  | 1.14  | 0.00237  | 0.014    | ENSMUSG0000010975  | 1700011103F | lincRNA      | 46946795 | 46948799  | downstream   | 27587   | 25313  | shortestDistance |
| chr8 | 47008380  | 47008680  | 301  | -1.57 | 0.000182 | 0.00183  | ENSMUSG0000010988  | Gm45600     | antisense_RI | 46994795 | 47014177  | inside       | 5647    | 5497   | shortestDistance |
| chr8 | 47191347  | 47192273  | 837  | 1.72  | 2.13E-05 | 0.000312 | ENSMUSG00000003814 | Stox2       | protein_codi | 47180048 | 47446362  | inside       | 254507  | 11389  | shortestDistance |
| chr8 | 47230084  | 47230399  | 316  | 3.72  | 2.89E-10 | 2.24E-08 | ENSMUSG00000003814 | Stox2       | protein_codi | 47180048 | 47446362  | inside       | 216120  | 50036  | shortestDistance |
| chr8 | 47326403  | 47326763  | 361  | -2.04 | 2.53E-06 | 5.14E-05 | ENSMUSG00000003814 | Stox2       | protein_codi | 47180048 | 47446362  | inside       | 119779  | 119599 | shortestDistance |
| chr8 | 47352347  | 47352763  | 417  | -1.29 | 0.00804  | 0.036    | ENSMUSG00000003814 | Stox2       | protein_codi | 47180048 | 47446362  | inside       | 93807   | 93599  | shortestDistance |
| chr8 | 47412579  | 47412961  | 383  | -1.46 | 0.000208 | 0.00204  | ENSMUSG00000003814 | Stox2       | protein_codi | 47180048 | 47446362  | inside       | 33592   | 33401  | shortestDistance |
| chr8 | 47413136  | 47413679  | 544  | -1    | 0.00519  | 0.0256   | ENSMUSG00000003814 | Stox2       | protein_codi | 47180048 | 47446362  | inside       | 32954   | 32683  | shortestDistance |
| chr8 | 47413720  | 47414011  | 292  | -1.38 | 0.000463 | 0.00389  | ENSMUSG00000003814 | Stox2       | protein_codi | 47180048 | 47446362  | inside       | 32496   | 32351  | shortestDistance |
| chr8 | 47828188  | 47828848  | 661  | -2.13 | 0.000262 | 0.00246  | ENSMUSG00000003156 | Wwc2        | protein_codi | 47823959 | 47990924  | inside       | 162406  | 4229   | shortestDistance |
| chr8 | 47851562  | 47852555  | 994  | -0.88 | 0.00782  | 0.0352   | ENSMUSG00000003156 | Wwc2        | protein_codi | 47823959 | 47990924  | inside       | 138866  | 27603  | shortestDistance |
| chr8 | 47928645  | 47929061  | 417  | -1.87 | 1.28E-05 | 0.000204 | ENSMUSG00000003156 | Wwc2        | protein_codi | 47823959 | 47990924  | inside       | 62071   | 61863  | shortestDistance |
| chr8 | 47941011  | 47941447  | 437  | -1.47 | 0.000433 | 0.00369  | ENSMUSG00000003156 | Wwc2        | protein_codi | 47823959 | 47990924  | inside       | 49695   | 49477  | shortestDistance |
| chr8 | 47947508  | 47948003  | 496  | -0.96 | 0.00242  | 0.0143   | ENSMUSG00000003156 | Wwc2        | protein_codi | 47823959 | 47990924  | inside       | 43168   | 42921  | shortestDistance |
| chr8 | 47974585  | 47975363  | 779  | -1.35 | 0.000515 | 0.00423  | ENSMUSG00000003156 | Wwc2        | protein_codi | 47823959 | 47990924  | inside       | 15950   | 15561  | shortestDistance |
| chr8 | 48019807  | 48020094  | 288  | -0.95 | 0.0107   | 0.0446   | ENSMUSG0000011062  | Gm32052     | lincRNA      | 48002210 | 48009133  | upstream     | -10817  | 10674  | shortestDistance |
| chr8 | 48042829  | 48043319  | 491  | -1.19 | 0.000874 | 0.00641  | ENSMUSG0000011054  | Gm2607      | processed_g  | 48070002 | 48070628  | downstream   | 27554   | 26683  | shortestDistance |
| chr8 | 48097364  | 48097882  | 519  | -1.34 | 0.000325 | 0.00292  | ENSMUSG00000003156 | Dctd        | protein_codi | 48090902 | 48153233  | upstream     | -1469   | 1210   | shortestDistance |
| chr8 | 48158554  | 48159165  | 612  | -1.19 | 0.00786  | 0.0353   | ENSMUSG00000003156 | Dctd        | protein_codi | 48090902 | 48153233  | downstream   | 59768   | 5321   | shortestDistance |
| chr8 | 48222244  | 48222751  | 508  | -1.26 | 0.01005  | 0.00744  | ENSMUSG00000003156 | Tenn3       | protein_codi | 48227682 | 48843951  | downstream   | 621453  | 4931   | shortestDistance |
| chr8 | 48300090  | 48300455  | 366  | -1.6  | 1.23E-05 | 0.000197 | ENSMUSG00000003156 | Tenn3       | protein_codi | 48227682 | 48843951  | inside       | 543679  | 72408  | shortestDistance |
| chr8 | 48300630  | 48301036  | 407  | -1    | 0.0124   | 0.0499   | ENSMUSG00000003156 | Tenn3       | protein_codi | 48227682 | 48843951  | inside       | 543118  | 72948  | shortestDistance |
| chr8 | 48332673  | 48332924  | 252  | -1.63 | 0.000316 | 0.00286  | ENSMUSG00000003156 | Tenn3       | protein_codi | 48227682 | 48843951  | inside       | 511153  | 104991 | shortestDistance |
| chr8 | 48740158  | 48740561  | 404  | -1.64 | 7.06E-05 | 0.000838 | ENSMUSG00000003156 | Tenn3       | protein_codi | 48227682 | 48843951  | inside       | 103591  | 103390 | shortestDistance |
| chr8 | 48816906  | 48817467  | 562  | -2.23 | 7.06E-05 | 0.000838 | ENSMUSG00000003156 | Tenn3       | protein_codi | 48227682 | 48843951  | inside       | 26765   | 26484  | shortestDistance |
| chr8 | 48842902  | 48843815  | 914  | -1.21 | 0.000173 | 0.00175  | ENSMUSG00000003156 | Tenn3       | protein_codi | 48227682 | 48843951  | inside       | 593     | 136    | shortestDistance |
| chr8 | 49500597  | 49500800  | 204  | -1.45 | 0.00111  | 0.00772  | ENSMUSG00000003155 | 4930555F03I | lincRNA      | 49370886 | 49548994  | inside       | 129812  | 48194  | shortestDistance |
| chr8 | 49946782  | 49947495  | 714  | 1.45  | 0.000637 | 0.005    | ENSMUSG0000010990  | Gm45321     | lincRNA      | 49818937 | 49949006  | inside       | 128201  | 1511   | shortestDistance |
| chr8 | 50292208  | 50292505  | 298  | -1.1  | 0.00222  | 0.0134   | ENSMUSG0000010974  | Gm45455     | lincRNA      | 50201613 | 50517680  | inside       | 225324  | 90595  | shortestDistance |
| chr8 | 53310367  | 53310651  | 285  | -1.85 | 1.46E-05 | 0.000226 | ENSMUSG0000011036  | Gm45554     | lincRNA      | 53436100 | 53480650  | upstream     | -125591 | 125449 | shortestDistance |
| chr8 | 53434028  | 53434821  | 794  | -1.37 | 7.18E-05 | 0.00085  | ENSMUSG0000011036  | Gm45554     | lincRNA      | 53436100 | 53480650  | upstream     | -1676   | 1279   | shortestDistance |
| chr8 | 53440757  | 53441143  | 387  | -1.15 | 0.00892  | 0.0389   | ENSMUSG0000011036  | Gm45554     | lincRNA      | 53436100 | 53480650  | upstream     | 4850    | 4657   | shortestDistance |
| chr8 | 53505677  | 53505926  | 250  | -1.33 | 0.00411  | 0.0214   | ENSMUSG00000003152 | Agg         | protein_codi | 53511727 | 53523421  | upstream     | -5925   | 5801   | shortestDistance |
| chr8 | 53511534  | 53512278  | 745  | -0.89 | 0.00254  | 0.0148   | ENSMUSG00000003152 | Agg         | protein_codi | 53511727 | 53523421  | overlapStart | 179     | 193    | shortestDistance |
| chr8 | 53603191  | 53603517  | 327  | -1.26 | 0.000231 | 0.00222  | ENSMUSG00000003939 | Neil3       | protein_codi | 53586867 | 53639065  | inside       | 35711   | 16324  | shortestDistance |
| chr8 | 53680895  | 53681265  | 371  | -1    | 0.009    | 0.0392   | ENSMUSG00000003939 | Neil3       | protein_codi | 53586867 | 53639065  | upstream     | -42015  | 41830  | shortestDistance |
| chr8 | 53700469  | 53700702  | 234  | -1.5  | 0.000287 | 0.00265  | ENSMUSG00000003939 | Neil3       | protein_codi | 53586867 | 53639065  | upstream     | -61521  | 61404  | shortestDistance |
| chr8 | 53707228  | 53707482  | 255  | 1.34  | 0.00532  | 0.0262   | ENSMUSG00000003939 | Neil3       | protein_codi | 53586867 | 53639065  | upstream     | -68290  | 68163  | shortestDistance |
| chr8 | 53892066  | 53892579  | 514  | -1.2  | 0.000576 | 0.00462  | ENSMUSG0000011033  | Gm19921     | processed_g  | 53911739 | 53912441  | upstream     | -19417  | 19160  | shortestDistance |
| chr8 | 53945641  | 53945967  | 327  | -2.36 | 1.98E-07 | 5.99E-06 | ENSMUSG0000011033  | Gm19921     | processed_g  | 53911739 | 53912441  | downstream   | 34065   | 33200  | shortestDistance |
| chr8 | 53947316  | 53947784  | 469  | -1.02 | 0.00471  | 0.0238   | ENSMUSG0000011033  | Gm19921     | processed_g  | 53911739 | 53912441  | downstream   | 35811   | 34875  | shortestDistance |
| chr8 | 53994024  | 53994860  | 837  | -0.79 | 0.0108   | 0.045    | ENSMUSG0000011033  | Gm19921     | processed_g  | 53911739 | 53912441  | downstream   | 82703   | 81583  | shortestDistance |
| chr8 | 54072731  | 54072940  | 210  | -1.07 | 0.00264  | 0.0152   | ENSMUSG00000003152 | Vegf        | protein_codi | 54077606 | 54187096  | upstream     | -4770   | 4666   | shortestDistance |
| chr8 | 54076856  | 54078336  | 1481 | -1.15 | 0.000696 | 0.00536  | ENSMUSG00000003152 | Vegf        | protein_codi | 54077606 | 54187096  | overlapStart | -10     | 730    | shortestDistance |
| chr8 | 54079653  | 54079890  | 238  | -0.97 | 0.00518  | 0.0256   | ENSMUSG00000003152 | Vegf        | protein_codi | 54077606 | 54187096  | inside       | 2166    | 2047   | shortestDistance |
| chr8 | 54087093  | 54087573  | 481  | -0.96 | 0.00234  | 0.0139   | ENSMUSG00000003152 | Vegf        | protein_codi | 54077606 | 54187096  | inside       | 9727    | 9487   | shortestDistance |
| chr8 | 54163144  | 54164094  | 951  | -1.99 | 6.41E-09 | 3.18E-07 | ENSMUSG00000003152 | Vegf        | protein_codi | 54077606 | 54187096  | inside       | 86013   | 23002  | shortestDistance |
| chr8 | 54230670  | 54230991  | 322  | -1.8  | 1.71E-05 | 0.000259 |                    |             |              |          |           |              |         |        |                  |

|      |          |          |      |       |          |          |                    |             |               |          |          |              |         |        |                  |
|------|----------|----------|------|-------|----------|----------|--------------------|-------------|---------------|----------|----------|--------------|---------|--------|------------------|
| chr8 | 57540238 | 57540735 | 498  | -1.27 | 0.000201 | 0.00198  | ENSMUSG00000003160 | Galtnt7     | protein_codi  | 57523828 | 57653032 | inside       | 112546  | 16410  | shortestDistance |
| chr8 | 57595892 | 57596292 | 401  | 2.27  | 1.80E-07 | 5.50E-06 | ENSMUSG00000003160 | Galtnt7     | protein_codi  | 57523828 | 57653032 | inside       | 56940   | 56740  | shortestDistance |
| chr8 | 57637593 | 57638494 | 902  | -1.28 | 0.000199 | 0.00196  | ENSMUSG00000003160 | Galtnt7     | protein_codi  | 57523828 | 57653032 | inside       | 14988   | 14538  | shortestDistance |
| chr8 | 57663887 | 57664681 | 795  | -1.26 | 0.000184 | 0.00185  | ENSMUSG0000011041  | AW046200    | bidirectional | 57651757 | 57663430 | downstream   | 12527   | 457    | shortestDistance |
| chr8 | 57799764 | 57800255 | 492  | -0.81 | 0.00869  | 0.0381   | ENSMUSG0000009691  | Galtnt6     | protein_codi  | 57774052 | 58912640 | inside       | 1112630 | 25712  | shortestDistance |
| chr8 | 57801154 | 57801669 | 516  | 0.83  | 0.0122   | 0.0494   | ENSMUSG0000009691  | Galtnt6     | protein_codi  | 57774052 | 58912640 | inside       | 1111228 | 27102  | shortestDistance |
| chr8 | 58147005 | 58147301 | 297  | -1.33 | 0.000255 | 0.0024   | ENSMUSG0000009691  | Galtnt6     | protein_codi  | 57774052 | 58912640 | inside       | 765487  | 372953 | shortestDistance |
| chr8 | 58566110 | 58566418 | 309  | -1.45 | 0.000248 | 0.00235  | ENSMUSG0000009691  | Galtnt6     | protein_codi  | 57774052 | 58912640 | inside       | 346376  | 346222 | shortestDistance |
| chr8 | 59961977 | 59962375 | 399  | -1.61 | 0.000107 | 0.00118  | ENSMUSG0000006572  | Gm26164     | snRNA         | 60079590 | 60079693 | upstream     | -117414 | 117215 | shortestDistance |
| chr8 | 60195626 | 60196014 | 389  | -1.82 | 1.08E-06 | 2.51E-05 | ENSMUSG0000010996  | Gm34730     | lincRNA       | 60195802 | 60280346 | overlapStart | 18      | 176    | shortestDistance |
| chr8 | 60466837 | 60467306 | 470  | -1.29 | 0.000117 | 0.00127  | ENSMUSG0000007002  | Gm10283     | protein_codi  | 60430024 | 60503198 | inside       | 36126   | 35892  | shortestDistance |
| chr8 | 60505554 | 60506511 | 958  | -1.31 | 2.29E-05 | 0.000331 | ENSMUSG0000005722  | Aadat       | protein_codi  | 60505932 | 60545677 | overlapStart | 100     | 378    | shortestDistance |
| chr8 | 60592727 | 60593088 | 362  | -3.45 | 1.35E-10 | 1.19E-08 | ENSMUSG0000010993  | Gm34730     | bidirectional | 60616416 | 60632731 | downstream   | 39823   | 23328  | shortestDistance |
| chr8 | 60594814 | 60595110 | 297  | -1.5  | 0.000354 | 0.00314  | ENSMUSG0000010993  | Gm34730     | bidirectional | 60616416 | 60632731 | downstream   | 37769   | 21306  | shortestDistance |
| chr8 | 60611223 | 60612413 | 1191 | -1.09 | 0.000229 | 0.00221  | ENSMUSG0000010993  | Gm34730     | bidirectional | 60616416 | 60632731 | downstream   | 20913   | 4003   | shortestDistance |
| chr8 | 60624714 | 60625152 | 439  | 2.58  | 2.60E-08 | 1.07E-06 | ENSMUSG0000010993  | Gm34730     | bidirectional | 60616416 | 60632731 | inside       | 7798    | 7579   | shortestDistance |
| chr8 | 60714636 | 60715151 | 516  | -1.31 | 7.24E-05 | 0.000856 | ENSMUSG0000010999  | Gm45650     | lincRNA       | 60719291 | 60725806 | upstream     | -4397   | 4140   | shortestDistance |
| chr8 | 60804735 | 60805308 | 574  | -1.39 | 0.000275 | 0.00255  | ENSMUSG0000008804  | Gm23329     | snRNA         | 60807739 | 60807846 | downstream   | 2824    | 2431   | shortestDistance |
| chr8 | 60859407 | 60860098 | 692  | -0.84 | 0.00703  | 0.0324   | ENSMUSG0000011026  | Gm45485     | processed_g   | 60846312 | 60846668 | downstream   | 13440   | 12739  | shortestDistance |
| chr8 | 60883300 | 60884113 | 814  | -0.92 | 0.00434  | 0.0223   | ENSMUSG0000003800  | Hgpf1       | protein_codi  | 60890418 | 60908671 | upstream     | -6712   | 6305   | shortestDistance |
| chr8 | 60920168 | 60920666 | 499  | -1.23 | 0.000218 | 0.00212  | ENSMUSG00000000431 | Cln3        | protein_codi  | 60910389 | 60983300 | inside       | 62883   | 9779   | shortestDistance |
| chr8 | 60954155 | 60955048 | 894  | -1.38 | 0.000399 | 0.00679  | ENSMUSG00000000431 | Cln3        | protein_codi  | 60910389 | 60983300 | inside       | 28698   | 28252  | shortestDistance |
| chr8 | 61059209 | 61059570 | 362  | -1.4  | 0.000442 | 0.00374  | ENSMUSG00000003164 | Nek1        | protein_codi  | 60993195 | 61131346 | inside       | 66195   | 66014  | shortestDistance |
| chr8 | 61177672 | 61178203 | 532  | -1.13 | 0.00242  | 0.0143   | ENSMUSG0000000868  | Gm16178     | antisense_RI  | 61117605 | 61194648 | inside       | 16710   | 16445  | shortestDistance |
| chr8 | 61265376 | 61265867 | 492  | -1.91 | 1.57E-06 | 3.43E-05 | ENSMUSG00000003164 | Sh3rf1      | protein_codi  | 61223872 | 61396071 | inside       | 41750   | 41504  | shortestDistance |
| chr8 | 61273266 | 61274140 | 875  | -1.89 | 3.28E-06 | 6.43E-05 | ENSMUSG00000003164 | Sh3rf1      | protein_codi  | 61223872 | 61396071 | inside       | 49831   | 49394  | shortestDistance |
| chr8 | 61283048 | 61283376 | 329  | -1.16 | 0.00156  | 0.0101   | ENSMUSG0000009941  | 1700001D001 | antisense_RI  | 61281522 | 61288872 | inside       | 5660    | 1526   | shortestDistance |
| chr8 | 61283589 | 61283981 | 393  | -1.37 | 0.000234 | 0.00224  | ENSMUSG0000009941  | 1700001D001 | antisense_RI  | 61281522 | 61288872 | inside       | 5087    | 2067   | shortestDistance |
| chr8 | 61316016 | 61316225 | 210  | -1.28 | 0.00337  | 0.0183   | ENSMUSG00000003164 | Sh3rf1      | protein_codi  | 61223872 | 61396071 | inside       | 92248   | 79846  | shortestDistance |
| chr8 | 61374420 | 61374744 | 325  | -1.33 | 0.000841 | 0.00623  | ENSMUSG00000003164 | Sh3rf1      | protein_codi  | 61223872 | 61396071 | inside       | 150710  | 21327  | shortestDistance |
| chr8 | 61450490 | 61451583 | 1094 | -1.15 | 0.000289 | 0.00266  | ENSMUSG00000003164 | Cbr4        | protein_codi  | 61487734 | 61506694 | upstream     | -36698  | 16317  | shortestDistance |
| chr8 | 61575181 | 61575623 | 443  | -1.21 | 0.00402  | 0.021    | ENSMUSG00000005805 | Palld       | protein_codi  | 61511433 | 61902690 | inside       | 327288  | 63748  | shortestDistance |
| chr8 | 61590669 | 61591480 | 812  | -0.93 | 0.00538  | 0.0264   | ENSMUSG00000005805 | Palld       | protein_codi  | 61511433 | 61902690 | inside       | 311616  | 79236  | shortestDistance |
| chr8 | 61686389 | 61686676 | 288  | -1.1  | 0.00527  | 0.026    | ENSMUSG00000005805 | Palld       | protein_codi  | 61511433 | 61902690 | inside       | 216158  | 174956 | shortestDistance |
| chr8 | 61731102 | 61731638 | 537  | -1.63 | 0.000262 | 0.00246  | ENSMUSG00000005805 | Palld       | protein_codi  | 61511433 | 61902690 | inside       | 171320  | 17052  | shortestDistance |
| chr8 | 61744881 | 61745554 | 674  | -1.07 | 0.00241  | 0.0142   | ENSMUSG00000005805 | Palld       | protein_codi  | 61511433 | 61902690 | inside       | 154742  | 157136 | shortestDistance |
| chr8 | 61748332 | 61748715 | 384  | -1.2  | 0.0023   | 0.0137   | ENSMUSG00000005805 | Palld       | protein_codi  | 61511433 | 61902690 | inside       | 154166  | 153975 | shortestDistance |
| chr8 | 61759694 | 61760422 | 729  | -1.6  | 7.61E-06 | 0.000131 | ENSMUSG00000005805 | Palld       | protein_codi  | 61511433 | 61902690 | inside       | 142632  | 142268 | shortestDistance |
| chr8 | 61780499 | 61781255 | 757  | -1.36 | 9.84E-05 | 0.0011   | ENSMUSG00000005805 | Palld       | protein_codi  | 61511433 | 61902690 | inside       | 121813  | 121435 | shortestDistance |
| chr8 | 61877072 | 61878231 | 1160 | -1.15 | 0.00326  | 0.0179   | ENSMUSG00000005805 | Palld       | protein_codi  | 61511433 | 61902690 | inside       | 25038   | 24459  | shortestDistance |
| chr8 | 61894066 | 61894404 | 339  | -1.13 | 0.00156  | 0.0101   | ENSMUSG00000005805 | Palld       | protein_codi  | 61511433 | 61902690 | inside       | 8455    | 8286   | shortestDistance |
| chr8 | 61920390 | 61920830 | 441  | 2.12  | 7.77E-07 | 1.90E-05 | ENSMUSG0000008686  | 4930512H181 | antisense_RI  | 61849006 | 61922834 | inside       | 71604   | 2004   | shortestDistance |
| chr8 | 61927700 | 61928606 | 907  | -0.85 | 0.00483  | 0.0242   | ENSMUSG0000003792  | Ddx60       | protein_codi  | 61928087 | 62038244 | overlapStart | 66      | 387    | shortestDistance |
| chr8 | 62014198 | 62014544 | 347  | 2.37  | 2.72E-07 | 7.84E-06 | ENSMUSG00000003792 | Ddx60       | protein_codi  | 61928087 | 62038244 | inside       | 86284   | 23700  | shortestDistance |
| chr8 | 62046867 | 62047195 | 329  | -1.85 | 9.48E-07 | 2.25E-05 | ENSMUSG00000003792 | Ddx60       | protein_codi  | 61928087 | 62038244 | downstream   | 118944  | 8623   | shortestDistance |
| chr8 | 62080263 | 62080539 | 277  | -0.95 | 0.0109   | 0.0452   | ENSMUSG00000003163 | Anxa10      | protein_codi  | 62057042 | 62123150 | inside       | 42749   | 23221  | shortestDistance |
| chr8 | 62793390 | 62793832 | 443  | -4.04 | 1.35E-10 | 1.19E-08 | ENSMUSG0000010999  | Gm45459     | lincRNA       | 62646335 | 62855382 | inside       | 61771   | 61550  | shortestDistance |
| chr8 | 63877074 | 63877779 | 706  | -1.07 | 0.00149  | 0.00975  | ENSMUSG0000007715  | Gm24580     | snRNA         | 63878196 | 63878326 | upstream     | -770    | 417    | shortestDistance |
| chr8 | 64204285 | 64204603 | 319  | -1.48 | 0.000235 | 0.00224  | ENSMUSG0000000362  | Tll1        | protein_codi  | 64014931 | 64206271 | inside       | 1827    | 1668   | shortestDistance |
| chr8 | 64205135 | 64206422 | 1288 | -1.22 | 0.00055  | 0.00445  | ENSMUSG0000000362  | Tll1        | protein_codi  | 64014931 | 64206271 | overlapStart | 493     | 151    | shortestDistance |
| chr8 | 64206481 | 64206881 | 401  | -1.02 | 0.00275  | 0.0157   | ENSMUSG0000000362  | Tll1        | protein_codi  | 64014931 | 64206271 | upstream     | -410    | 210    | shortestDistance |
| chr8 | 64275592 | 64276592 | 671  | -1.85 | 5.88E-06 | 0.000105 | ENSMUSG0000000362  | Tll1        | protein_codi  | 64014931 | 64206271 | upstream     | -69986  | 69651  | shortestDistance |
| chr8 | 64357029 | 64357381 | 323  | 1.99  | 0.000153 | 0.00158  | ENSMUSG0000010957  | Gm35521     | lincRNA       | 64408643 | 64417100 | downstream   | 59880   | 51262  | shortestDistance |
| chr8 | 64370075 | 64370707 | 633  | -1.36 | 0.000201 | 0.00199  | ENSMUSG0000010957  | Gm35521     | lincRNA       | 64408643 | 64417100 | downstream   | 46709   | 37936  | shortestDistance |
| chr8 | 64376573 | 64376044 | 670  | 3.31  | 6.46E-16 | 4.36E-13 | ENSMUSG0000010957  | Gm35521     | lincRNA       | 64408643 | 64417100 | downstream   | 41390   | 32599  | shortestDistance |
| chr8 | 64531794 | 64532186 | 393  | -1.88 | 1.52E-06 | 3.34E-05 | ENSMUSG0000007604  | Mir710      | miRNA         | 64514332 | 64514441 | upstream     | -17549  | 17353  | shortestDistance |
| chr8 | 64548312 | 64548854 | 543  | -1.28 | 0.000144 | 0.0015   | ENSMUSG0000007604  | Mir710      | miRNA         | 64514332 | 64514441 | upstream     | -34142  | 33871  | shortestDistance |
| chr8 | 64597070 | 64597578 | 509  | -1.11 | 0.000765 | 0.00577  | ENSMUSG00000003785 | Cpe         | protein_codi  | 64592542 | 64693054 | inside       | 95730   | 4528   | shortestDistance |
| chr8 | 64618641 | 64619056 | 416  | -0.93 | 0.00348  | 0.0188   | ENSMUSG00000003785 | Cpe         | protein_codi  | 64592542 | 64693054 | inside       | 74206   | 26099  | shortestDistance |
| chr8 | 64692615 | 64693259 | 645  | -0.87 | 0.00759  | 0.0344   | ENSMUSG00000003785 | Cpe         | protein_codi  | 64592542 | 64693054 | overlapStart | 117     | 205    | shortestDistance |
| chr8 | 64781947 | 64782466 | 520  | -1.33 | 0.000907 | 0.00659  | ENSMUSG00000003160 | Khl2        | protein_codi  | 64739675 | 64850017 | inside       | 67811   | 42272  | shortestDistance |
| chr8 | 64788621 | 64789258 | 638  | -1.11 | 0.00074  | 0.00562  | ENSMUSG00000003160 | Khl2        | protein_codi  | 64739675 | 64850017 | inside       | 61077   | 48946  | shortestDistance |
| chr8 | 64820755 | 64821343 | 589  | 1.37  | 0.00292  | 0.0165   | ENSMUSG00000003160 | Khl2        | protein_codi  | 64739675 | 64850017 | inside       | 28968   | 28674  | shortestDistance |
| chr8 | 64829379 | 64829756 | 378  | 2.96  | 5.57E-13 | 1.13E-10 | ENSMUSG00000003160 | Khl2        | protein_codi  | 64739675 | 64850017 | inside       | 20449   | 20261  | shortestDistance |
| chr8 | 64840742 | 64841072 | 331  | -1.44 | 0.00028  | 0.00259  | ENSMUSG00000003160 | Khl2        | protein_codi  | 64739675 | 64850017 | inside       | 9110    | 8945   | shortestDistance |
| chr8 | 64842031 | 64842360 | 330  | -3.48 | 3.47E-07 | 9.63E-06 | ENSMUSG00000003160 | Khl2        | protein_codi  | 64739675 | 64850017 | inside       | 7821    | 7657   | shortestDistance |
| chr8 | 64888856 | 64889229 | 374  | 2     | 2.09E-05 | 0.000307 | ENSMUSG0000010961  | Gm45405     | processed_g   | 64910968 | 64911977 | downstream   | 22935   | 21739  | shortestDistance |
| chr8 | 64921675 | 64922144 | 470  | -2.02 | 0.000763 | 0.00576  | ENSMUSG0000010961  | Gm45405     | processed_g   | 64910968 | 64911977 | upstream     | -9933   | 9698   | shortestDistance |
| chr8 | 64962875 | 64963168 | 294  | -1.04 | 0.00381  | 0.0202   | ENSMUSG0000002552  | Tmem192     | protein_codi  | 64947185 | 64969033 | inside       | 15837   | 5865   | shortestDistance |
| chr8 | 65080791 | 65081157 | 367  | -0.99 | 0.0124   | 0.0498   | ENSMUSG0000007430  | Gm10663     | protein_codi  | 65075033 | 65077480 | downstream   | 5941    | 3311   | shortestDistance |
| chr8 | 66342920 | 66343356 | 437  | 2.67  | 1.60E-08 | 7.03E-   |                    |             |               |          |          |              |         |        |                  |

|      |          |          |      |       |          |          |                   |             |              |          |          |              |        |        |                  |
|------|----------|----------|------|-------|----------|----------|-------------------|-------------|--------------|----------|----------|--------------|--------|--------|------------------|
| chr8 | 70522888 | 70523391 | 504  | 0.89  | 0.00924  | 0.04     | ENSMUSG0000005555 | Kxd1        | protein_codi | 70508272 | 70527956 | inside       | 4816   | 4565   | shortestDistance |
| chr8 | 70544114 | 70544709 | 596  | 2     | 2.65E-07 | 7.65E-06 | ENSMUSG0000007000 | Elb         | protein_codi | 70539457 | 70592858 | inside       | 4955   | 4657   | shortestDistance |
| chr8 | 70608319 | 70608533 | 215  | 2.02  | 3.43E-06 | 6.67E-05 | ENSMUSG0000007000 | Ssbp4       | protein_codi | 70597490 | 70608872 | inside       | 446    | 339    | shortestDistance |
| chr8 | 70618731 | 70619345 | 615  | 1.03  | 0.00253  | 0.0147   | ENSMUSG0000004998 | Lrrc25      | protein_codi | 70616155 | 70620890 | inside       | 2883   | 1545   | shortestDistance |
| chr8 | 70806556 | 70806921 | 366  | 1.21  | 0.00139  | 0.00925  | ENSMUSG0000003183 | Mast3       | protein_codi | 70778117 | 70805054 | upstream     | -1684  | 1502   | shortestDistance |
| chr8 | 71507556 | 71508035 | 480  | 1.17  | 0.00179  | 0.0113   | ENSMUSG0000003484 | Plvap       | protein_codi | 71497765 | 71511752 | inside       | 3956   | 3717   | shortestDistance |
| chr8 | 71747005 | 71747576 | 572  | 1.52  | 0.000511 | 0.0042   | ENSMUSG0000011046 | Gm35572     | lincRNA      | 71752026 | 71781322 | downstream   | 34032  | 4450   | shortestDistance |
| chr8 | 72009049 | 72009830 | 782  | 1.07  | 0.0054   | 0.0265   | ENSMUSG0000000348 | Cyp4f18     | protein_codi | 71988482 | 72009626 | overlapStart | 186    | 204    | shortestDistance |
| chr8 | 72183513 | 72184267 | 755  | 0.84  | 0.0115   | 0.0471   | ENSMUSG0000000303 | Rab8a       | protein_codi | 72161200 | 72183904 | overlapEnd   | 22690  | 363    | shortestDistance |
| chr8 | 72272452 | 72272751 | 300  | 0.98  | 0.00529  | 0.026    | ENSMUSG0000011044 | Gm39197     | processed_g  | 72283698 | 72284154 | downstream   | 11552  | 10947  | shortestDistance |
| chr8 | 72284989 | 72285263 | 275  | 1.29  | 0.000657 | 0.00512  | ENSMUSG0000011044 | Gm39197     | processed_g  | 72283698 | 72284154 | upstream     | -972   | 835    | shortestDistance |
| chr8 | 72487013 | 72487356 | 344  | 2.26  | 1.84E-08 | 7.91E-07 | ENSMUSG0000001973 | Slc35e1     | protein_codi | 72480641 | 72492614 | inside       | 5430   | 5258   | shortestDistance |
| chr8 | 72761173 | 72762625 | 1453 | -0.78 | 0.0105   | 0.0441   | ENSMUSG0000005014 | F2r13       | protein_codi | 72761880 | 72763874 | overlapStart | 19     | 707    | shortestDistance |
| chr8 | 72815590 | 72816164 | 575  | 1.39  | 0.000387 | 0.00337  | ENSMUSG0000000438 | Large1      | protein_codi | 72814599 | 73353540 | inside       | 537663 | 991    | shortestDistance |
| chr8 | 72835931 | 72836327 | 397  | 1.7   | 9.68E-05 | 0.00108  | ENSMUSG0000000438 | Large1      | protein_codi | 72814599 | 73353540 | inside       | 517411 | 21332  | shortestDistance |
| chr8 | 73161586 | 73162450 | 865  | -1.11 | 0.000787 | 0.0059   | ENSMUSG0000000438 | Large1      | protein_codi | 72814599 | 73353540 | inside       | 191522 | 191090 | shortestDistance |
| chr8 | 73233365 | 73233868 | 504  | -1.2  | 0.00022  | 0.00213  | ENSMUSG0000000438 | Large1      | protein_codi | 72814599 | 73353540 | inside       | 119924 | 119672 | shortestDistance |
| chr8 | 73291629 | 73292027 | 399  | -1.9  | 7.47E-07 | 1.84E-05 | ENSMUSG0000000438 | Large1      | protein_codi | 72814599 | 73353540 | inside       | 61712  | 61513  | shortestDistance |
| chr8 | 73293624 | 73294101 | 478  | 0.91  | 0.00818  | 0.0365   | ENSMUSG0000000438 | Large1      | protein_codi | 72814599 | 73353540 | inside       | 59678  | 59439  | shortestDistance |
| chr8 | 73313618 | 73314400 | 783  | -1.29 | 0.000323 | 0.00291  | ENSMUSG0000000438 | Large1      | protein_codi | 72814599 | 73353540 | inside       | 39531  | 39140  | shortestDistance |
| chr8 | 74639103 | 74639693 | 591  | -1.89 | 1.66E-07 | 5.11E-06 | ENSMUSG0000007901 | Gm11033     | lincRNA      | 74590987 | 74833947 | inside       | 194549 | 48116  | shortestDistance |
| chr8 | 74647882 | 74648120 | 239  | -1.72 | 0.000214 | 0.00209  | ENSMUSG0000007901 | Gm11033     | lincRNA      | 74590987 | 74833947 | inside       | 185946 | 56895  | shortestDistance |
| chr8 | 74659971 | 74660501 | 531  | -2.06 | 1.20E-05 | 0.000193 | ENSMUSG0000007901 | Gm11033     | lincRNA      | 74590987 | 74833947 | inside       | 173711 | 68984  | shortestDistance |
| chr8 | 74980151 | 74981029 | 879  | -0.78 | 0.0116   | 0.0476   | ENSMUSG0000003451 | Hmgxb4      | protein_codi | 74993356 | 75031978 | upstream     | -12766 | 12327  | shortestDistance |
| chr8 | 75039733 | 75040164 | 432  | 1.94  | 9.71E-05 | 0.00109  | ENSMUSG0000011043 | Gm45820     | antisense_RI | 75037434 | 75045246 | inside       | 5298   | 2299   | shortestDistance |
| chr8 | 75055689 | 75056067 | 379  | 3.41  | 6.43E-12 | 9.03E-10 | ENSMUSG0000000428 | Tom1        | protein_codi | 75033705 | 75070121 | inside       | 22173  | 14054  | shortestDistance |
| chr8 | 75081348 | 75082010 | 663  | -1.1  | 0.00029  | 0.00267  | ENSMUSG0000011042 | Gm2059      | processed_g  | 75079141 | 75079871 | downstream   | 2538   | 1477   | shortestDistance |
| chr8 | 75212670 | 75213682 | 1013 | -0.86 | 0.00424  | 0.022    | ENSMUSG0000003447 | Ras2d       | protein_codi | 75213944 | 75224113 | upstream     | -768   | 262    | shortestDistance |
| chr8 | 75315804 | 75316289 | 486  | -0.9  | 0.00762  | 0.0345   | ENSMUSG0000011043 | Gm45907     | processed_g  | 75294570 | 75294762 | downstream   | 21476  | 21042  | shortestDistance |
| chr8 | 76422502 | 76422767 | 266  | -1.87 | 3.49E-05 | 0.00047  | ENSMUSG0000011048 | Gm45740     | lincRNA      | 75992509 | 76415040 | upstream     | -7594  | 7462   | shortestDistance |
| chr8 | 76432714 | 76433261 | 548  | -2.28 | 5.19E-06 | 9.49E-05 | ENSMUSG0000011048 | Gm45740     | lincRNA      | 75992509 | 76415040 | upstream     | -17948 | 17674  | shortestDistance |
| chr8 | 76910354 | 76910784 | 431  | -2.05 | 1.87E-06 | 3.97E-05 | ENSMUSG0000003161 | Nr3c2       | protein_codi | 76899442 | 77245012 | inside       | 11127  | 10912  | shortestDistance |
| chr8 | 76987923 | 76988320 | 398  | -2.85 | 2.85E-07 | 8.14E-06 | ENSMUSG0000003161 | Nr3c2       | protein_codi | 76899442 | 77245012 | inside       | 88680  | 88481  | shortestDistance |
| chr8 | 77112731 | 77113352 | 622  | -0.84 | 0.0106   | 0.0443   | ENSMUSG0000003161 | Nr3c2       | protein_codi | 76899442 | 77245012 | inside       | 213600 | 131660 | shortestDistance |
| chr8 | 77116510 | 77117033 | 524  | -1.13 | 0.00412  | 0.0215   | ENSMUSG0000003161 | Nr3c2       | protein_codi | 76899442 | 77245012 | inside       | 217330 | 127979 | shortestDistance |
| chr8 | 77132797 | 77133325 | 529  | -1.79 | 1.08E-05 | 0.000177 | ENSMUSG0000003161 | Nr3c2       | protein_codi | 76899442 | 77245012 | inside       | 233619 | 111687 | shortestDistance |
| chr8 | 77133761 | 77134346 | 586  | -1.37 | 0.00212  | 0.0129   | ENSMUSG0000003161 | Nr3c2       | protein_codi | 76899442 | 77245012 | inside       | 234612 | 110666 | shortestDistance |
| chr8 | 77214755 | 77215114 | 360  | -2.89 | 1.47E-11 | 1.84E-09 | ENSMUSG0000003161 | Nr3c2       | protein_codi | 76899442 | 77245012 | inside       | 315492 | 29898  | shortestDistance |
| chr8 | 77276744 | 77277502 | 759  | -0.99 | 0.0033   | 0.0181   | ENSMUSG0000003714 | Arhgap10    | protein_codi | 77250366 | 77517953 | inside       | 240830 | 26378  | shortestDistance |
| chr8 | 77367076 | 77367498 | 423  | -2.05 | 1.61E-07 | 4.98E-06 | ENSMUSG0000003714 | Arhgap10    | protein_codi | 77250366 | 77517953 | inside       | 150666 | 116710 | shortestDistance |
| chr8 | 77584143 | 77584485 | 343  | -1.75 | 5.31E-05 | 0.000664 | ENSMUSG0000003713 | Prrm19      | protein_codi | 77549397 | 77581338 | downstream   | 34917  | 2805   | shortestDistance |
| chr8 | 77617943 | 77618318 | 376  | -1.13 | 0.0018   | 0.0113   | ENSMUSG0000008645 | 4933431K23  | processed_tr | 77610860 | 77769682 | inside       | 7270   | 7083   | shortestDistance |
| chr8 | 78063586 | 78063911 | 326  | -1.07 | 0.00301  | 0.0169   | ENSMUSG0000011038 | Gm29895     | lincRNA      | 78044010 | 78055473 | downstream   | 19738  | 8113   | shortestDistance |
| chr8 | 78254350 | 78255007 | 658  | -1.06 | 0.000785 | 0.00589  | ENSMUSG0000003710 | Ttcr29      | protein_codi | 78213297 | 78394326 | inside       | 41381  | 41053  | shortestDistance |
| chr8 | 78271373 | 78271717 | 345  | -1.83 | 1.26E-05 | 2.00E-04 | ENSMUSG0000003710 | Ttcr29      | protein_codi | 78213297 | 78394326 | inside       | 58248  | 58076  | shortestDistance |
| chr8 | 78340679 | 78341294 | 616  | 1.58  | 0.000195 | 0.00193  | ENSMUSG0000003710 | Ttcr29      | protein_codi | 78213297 | 78394326 | inside       | 127689 | 53032  | shortestDistance |
| chr8 | 78544552 | 78545747 | 1196 | -1.25 | 0.000469 | 0.00393  | ENSMUSG0000003168 | Slc10a7     | protein_codi | 78509346 | 78734003 | inside       | 35804  | 35206  | shortestDistance |
| chr8 | 78810144 | 78810770 | 627  | 3.3   | 2.53E-13 | 6.00E-11 | ENSMUSG0000003168 | Lsm6        | protein_codi | 78804865 | 78821140 | inside       | 10683  | 5279   | shortestDistance |
| chr8 | 78838400 | 78839377 | 978  | -1.15 | 0.000455 | 0.00383  | ENSMUSG0000003168 | Lsm6        | protein_codi | 78804865 | 78821140 | upstream     | -17748 | 17260  | shortestDistance |
| chr8 | 78882803 | 78883488 | 686  | 1.95  | 1.38E-06 | 3.06E-05 | ENSMUSG0000006998 | Gm8054      | processed_g  | 78869386 | 78869868 | upstream     | -13278 | 12935  | shortestDistance |
| chr8 | 79059303 | 79059776 | 474  | -1.18 | 0.00213  | 0.0129   | ENSMUSG0000003710 | Ttcr29      | protein_codi | 79028437 | 79193766 | inside       | 31103  | 30866  | shortestDistance |
| chr8 | 79208644 | 79209036 | 393  | -1.48 | 0.000841 | 0.00623  | ENSMUSG0000003168 | 17000111225 | protein_codi | 79210431 | 79248570 | downstream   | 39730  | 1395   | shortestDistance |
| chr8 | 79339608 | 79339918 | 311  | -1.07 | 0.00526  | 0.0259   | ENSMUSG0000003168 | Smacl1      | protein_codi | 79338395 | 79399518 | inside       | 59755  | 1213   | shortestDistance |
| chr8 | 79443308 | 79444101 | 594  | 1.07  | 0.00535  | 0.0263   | ENSMUSG0000010994 | Gm45601     | lincRNA      | 79404148 | 79411216 | downstream   | 39656  | 32292  | shortestDistance |
| chr8 | 79540055 | 79540455 | 401  | 1.62  | 0.00186  | 0.0116   | ENSMUSG0000009797 | Gm8079      | processed_g  | 79549774 | 79550748 | downstream   | 10493  | 9319   | shortestDistance |
| chr8 | 80149398 | 80149783 | 386  | -1.44 | 0.00106  | 0.00745  | ENSMUSG0000010959 | Gm45431     | lincRNA      | 80128194 | 80138667 | upstream     | -10923 | 10731  | shortestDistance |
| chr8 | 80203746 | 80204240 | 495  | 3.43  | 2.02E-13 | 4.89E-11 | ENSMUSG0000011029 | Gm45430     | lincRNA      | 80195199 | 80197656 | downstream   | 8794   | 6090   | shortestDistance |
| chr8 | 80262943 | 80263352 | 410  | -0.85 | 0.0123   | 0.0496   | ENSMUSG0000011029 | Gm45430     | lincRNA      | 80195199 | 80197656 | downstream   | 67949  | 65287  | shortestDistance |
| chr8 | 80264875 | 80265316 | 442  | 2.07  | 8.84E-07 | 2.12E-05 | ENSMUSG0000011029 | Gm45430     | lincRNA      | 80195199 | 80197656 | downstream   | 69897  | 67219  | shortestDistance |
| chr8 | 80290256 | 80290652 | 397  | 2.16  | 5.78E-06 | 0.000104 | ENSMUSG0000011029 | Gm45430     | lincRNA      | 80195199 | 80197656 | downstream   | 95255  | 92600  | shortestDistance |
| chr8 | 80325091 | 80325694 | 604  | 2.15  | 1.33E-09 | 8.17E-08 | ENSMUSG0000011029 | Gm45430     | lincRNA      | 80195199 | 80197656 | downstream   | 130193 | 127435 | shortestDistance |
| chr8 | 80325829 | 80326114 | 286  | 2.23  | 1.73E-05 | 0.000262 | ENSMUSG0000011029 | Gm45430     | lincRNA      | 80195199 | 80197656 | downstream   | 130773 | 128173 | shortestDistance |
| chr8 | 80475023 | 80475312 | 290  | -1.63 | 0.000233 | 0.00223  | ENSMUSG0000005183 | Gypa        | protein_codi | 80493781 | 80510542 | upstream     | -18613 | 18469  | shortestDistance |
| chr8 | 80624445 | 80624704 | 260  | -1.39 | 0.00106  | 0.00744  | ENSMUSG0000004235 | Frems3      | protein_codi | 80611080 | 80695356 | inside       | 13494  | 13365  | shortestDistance |
| chr8 | 80919078 | 80919583 | 506  | 3.59  | 1.07E-14 | 4.36E-12 | ENSMUSG0000009800 | Gm27048     | lincRNA      | 80933534 | 80938667 | downstream   | 19337  | 13951  | shortestDistance |
| chr8 | 80952051 | 80952749 | 699  | 1.59  | 6.00E-06 | 0.000107 | ENSMUSG0000009800 | Gm27048     | lincRNA      | 80933534 | 80938667 | upstream     | -13733 | 13384  | shortestDistance |
| chr8 | 81223960 | 81224233 | 274  | -1.54 | 0.00117  | 0.00809  | ENSMUSG0000009461 | Gm4899      | processed_g  | 81197630 | 81198348 | upstream     | -25748 | 25612  | shortestDistance |
| chr8 | 81491230 | 81491673 | 444  | 1.53  | 0.000109 | 0.0012   | ENSMUSG0000003794 | Inpp4b      | protein_codi | 81342556 | 82127914 | inside       | 148896 | 148674 | shortestDistance |
| chr8 | 81751131 | 81751594 | 464  | 1.53  | 1.71E-05 | 0.00026  | ENSMUSG0000003794 | Inpp4b      | protein_codi | 81342556 | 82127914 | inside       | 408806 | 376320 | shortestDistance |
| chr8 | 81773511 | 81774901 | 1391 | 0.78  | 0.00982  | 0.0419   | ENSMUSG0000003794 | Inpp4b      | protein_codi | 81342556 | 82127914 | inside       | 431650 | 350313 | shortestDistance |
| chr8 | 81854455 | 81855282 | 828  | -0.85 | 0        |          |                   |             |              |          |          |              |        |        |                  |

|      |           |           |      |       |          |          |                    |             |              |           |           |              |        |       |                  |
|------|-----------|-----------|------|-------|----------|----------|--------------------|-------------|--------------|-----------|-----------|--------------|--------|-------|------------------|
| chr8 | 86757370  | 86757673  | 304  | 1.04  | 0.0121   | 0.0491   | ENSMUSG0000007417  | Gm10638     | protein_codi | 86745699  | 86746603  | downstream   | 11823  | 10767 | shortestDistance |
| chr8 | 86766645  | 86767231  | 587  | 2.75  | 1.67E-09 | 9.97E-08 | ENSMUSG0000007417  | Gm10638     | protein_codi | 86745699  | 86746603  | downstream   | 21239  | 20042 | shortestDistance |
| chr8 | 86872137  | 86872455  | 319  | 1.2   | 0.0037   | 0.0197   | ENSMUSG0000003165  | N4bp1       | protein_codi | 86808160  | 86885258  | inside       | 12962  | 12803 | shortestDistance |
| chr8 | 86887918  | 86888908  | 991  | 1.1   | 0.000319 | 0.00288  | ENSMUSG0000009843  | 2010110E17f | lincRNA      | 86885688  | 86886566  | downstream   | 2725   | 1352  | shortestDistance |
| chr8 | 86902056  | 86902426  | 371  | 1.28  | 0.00144  | 0.00953  | ENSMUSG0000009853  | Gm27167     | lincRNA      | 86902453  | 86919422  | upstream     | -212   | 27    | shortestDistance |
| chr8 | 86903075  | 86903453  | 379  | 0.92  | 0.00828  | 0.0368   | ENSMUSG0000009853  | Gm27167     | lincRNA      | 86902453  | 86919422  | inside       | 811    | 622   | shortestDistance |
| chr8 | 87078158  | 87078561  | 404  | -2.08 | 1.25E-06 | 2.82E-05 | ENSMUSG0000009885  | Gm5118      | lincRNA      | 87093307  | 87100987  | upstream     | -14947 | 14746 | shortestDistance |
| chr8 | 87609742  | 87610152  | 411  | 2.38  | 5.15E-06 | 9.43E-05 | ENSMUSG0000006997  | 4933402J07f | protein_codi | 87563853  | 87589424  | downstream   | 46094  | 20318 | shortestDistance |
| chr8 | 87708070  | 87708728  | 659  | -0.85 | 0.0119   | 0.0484   | ENSMUSG0000004533  | Zfp423      | protein_codi | 87661810  | 87959595  | inside       | 251196 | 46260 | shortestDistance |
| chr8 | 88241892  | 88242230  | 339  | 1.15  | 0.00772  | 0.0348   | ENSMUSG0000003677  | Papd5       | protein_codi | 88199213  | 88259722  | inside       | 42848  | 17492 | shortestDistance |
| chr8 | 88269528  | 88269938  | 411  | 1.26  | 0.00259  | 0.015    | ENSMUSG0000003165  | Adcy7       | protein_codi | 88272403  | 88329962  | upstream     | -2670  | 2465  | shortestDistance |
| chr8 | 88306461  | 88306795  | 335  | 0.97  | 0.0115   | 0.0471   | ENSMUSG0000003165  | Adcy7       | protein_codi | 88272403  | 88329962  | inside       | 34225  | 23167 | shortestDistance |
| chr8 | 88605440  | 88605970  | 531  | -1.02 | 0.011    | 0.0456   | ENSMUSG0000003166  | Nkd1        | protein_codi | 88521354  | 88594884  | downstream   | 84351  | 10556 | shortestDistance |
| chr8 | 89040950  | 89041404  | 455  | -1.41 | 0.000861 | 0.00633  | ENSMUSG0000003166  | Sall1       | protein_codi | 89027235  | 89044162  | inside       | 2985   | 2758  | shortestDistance |
| chr8 | 90819847  | 90820726  | 880  | 1.89  | 1.02E-06 | 2.39E-05 | ENSMUSG0000001103  | Gm19935     | protein_codi | 90816145  | 90817393  | upstream     | -2893  | 2454  | shortestDistance |
| chr8 | 90822398  | 90822704  | 307  | 1.02  | 0.0077   | 0.0347   | ENSMUSG0000001103  | Gm19935     | protein_codi | 90816145  | 90817393  | upstream     | -5158  | 5005  | shortestDistance |
| chr8 | 91054436  | 91054800  | 365  | -1.06 | 0.00365  | 0.0195   | ENSMUSG0000005666  | Chd9        | protein_codi | 90828352  | 91054516  | overlapEnd   | 26266  | 80    | shortestDistance |
| chr8 | 91077299  | 91077858  | 560  | -1.16 | 0.00206  | 0.0126   | ENSMUSG0000003166  | Rbl2        | protein_codi | 91070057  | 91123844  | inside       | 7521   | 7242  | shortestDistance |
| chr8 | 91160037  | 91160796  | 760  | -0.84 | 0.0073   | 0.0334   | ENSMUSG0000001101  | Gm45666     | antisense_RI | 91160516  | 91171180  | overlapStart | -100   | 280   | shortestDistance |
| chr8 | 91176128  | 91176585  | 458  | 1.05  | 0.00436  | 0.0224   | ENSMUSG0000003166  | Aktip       | protein_codi | 91111784  | 91199976  | inside       | 23620  | 23391 | shortestDistance |
| chr8 | 91360459  | 91361386  | 928  | -1.19 | 0.000193 | 0.00192  | ENSMUSG0000000559  | Fto         | protein_codi | 91313525  | 91668439  | inside       | 47397  | 46934 | shortestDistance |
| chr8 | 91381744  | 91382148  | 405  | 1.65  | 4.99E-06 | 9.17E-05 | ENSMUSG0000000559  | Fto         | protein_codi | 91313525  | 91668439  | inside       | 68421  | 68219 | shortestDistance |
| chr8 | 91565906  | 91566373  | 468  | -1.08 | 0.00487  | 0.0244   | ENSMUSG0000000559  | Fto         | protein_codi | 91313525  | 91668439  | inside       | 252615 | 10266 | shortestDistance |
| chr8 | 91991542  | 91991902  | 361  | -1.12 | 0.00259  | 0.015    | ENSMUSG0000001096  | Gm36670     | lincRNA      | 91974095  | 91991947  | inside       | 225    | 45    | shortestDistance |
| chr8 | 92010286  | 92010853  | 568  | -1.19 | 0.0112   | 0.0464   | ENSMUSG0000001102  | Gm36843     | lincRNA      | 91997594  | 92009006  | downstream   | 12976  | 1280  | shortestDistance |
| chr8 | 92063075  | 92064390  | 686  | -1.5  | 7.51E-05 | 0.00088  | ENSMUSG0000006563  | Gm24254     | snRNA        | 92039917  | 92040020  | downstream   | 24131  | 23685 | shortestDistance |
| chr8 | 92136934  | 92137732  | 799  | -1.11 | 0.00194  | 0.012    | ENSMUSG0000001103  | Gm45332     | lincRNA      | 92152096  | 92158266  | downstream   | 20933  | 14364 | shortestDistance |
| chr8 | 92147762  | 92148246  | 575  | -1.04 | 0.0042   | 0.0218   | ENSMUSG0000001103  | Gm45332     | lincRNA      | 92152096  | 92158266  | downstream   | 10307  | 3850  | shortestDistance |
| chr8 | 92772096  | 92773104  | 1009 | -1.08 | 0.00345  | 0.0187   | ENSMUSG0000003174  | Mmp2        | protein_codi | 92827291  | 92853420  | upstream     | -54691 | 54187 | shortestDistance |
| chr8 | 92827161  | 92827935  | 775  | -1.21 | 0.000984 | 0.00705  | ENSMUSG0000003174  | Mmp2        | protein_codi | 92827291  | 92853420  | overlapStart | 257    | 130   | shortestDistance |
| chr8 | 92839786  | 92840299  | 514  | 1.88  | 3.92E-05 | 0.000517 | ENSMUSG0000003174  | Mmp2        | protein_codi | 92827291  | 92853420  | inside       | 12751  | 12495 | shortestDistance |
| chr8 | 92881220  | 92881644  | 425  | 3.7   | 4.16E-17 | 5.36E-14 | ENSMUSG0000003319  | Lpcat2      | protein_codi | 92855339  | 92919279  | inside       | 26093  | 25881 | shortestDistance |
| chr8 | 92897650  | 92898164  | 515  | -1.15 | 0.00641  | 0.0302   | ENSMUSG0000003319  | Lpcat2      | protein_codi | 92855339  | 92919279  | inside       | 42568  | 21115 | shortestDistance |
| chr8 | 93014302  | 93014760  | 459  | -1.9  | 1.94E-06 | 4.10E-05 | ENSMUSG0000001096  | Gm45463     | processed_tr | 93011619  | 93041516  | inside       | 2912   | 2683  | shortestDistance |
| chr8 | 93030686  | 93031066  | 381  | -2.11 | 4.91E-06 | 9.06E-05 | ENSMUSG0000001074  | Ces1a       | protein_codi | 93020214  | 93048192  | inside       | 17316  | 10472 | shortestDistance |
| chr8 | 93059196  | 93059516  | 321  | -1.27 | 0.000456 | 0.00384  | ENSMUSG0000000789  | Ces1b       | protein_codi | 93056728  | 93080017  | inside       | 20661  | 2468  | shortestDistance |
| chr8 | 93075257  | 93075551  | 395  | -2.85 | 9.45E-10 | 6.22E-08 | ENSMUSG0000000789  | Ces1b       | protein_codi | 93056728  | 93080017  | inside       | 4563   | 4366  | shortestDistance |
| chr8 | 93095402  | 93095743  | 342  | -1.41 | 0.000124 | 0.00133  | ENSMUSG0000000574  | Ces1c       | protein_codi | 93099015  | 93131283  | downstream   | 35711  | 3272  | shortestDistance |
| chr8 | 93140773  | 93141059  | 287  | -1.18 | 0.00207  | 0.0126   | ENSMUSG0000001107  | Gm45910     | unprocessed  | 93141331  | 93154116  | downstream   | 13200  | 272   | shortestDistance |
| chr8 | 93332638  | 93333027  | 390  | -2.63 | 5.31E-07 | 1.37E-05 | ENSMUSG0000000577  | Ces1g       | protein_codi | 93302369  | 93337308  | inside       | 4476   | 4281  | shortestDistance |
| chr8 | 93429877  | 93430194  | 318  | -1.59 | 0.000669 | 0.0052   | ENSMUSG0000001107  | Gm45765     | antisense_RI | 93363623  | 93431049  | inside       | 66413  | 855   | shortestDistance |
| chr8 | 93661732  | 93662128  | 397  | -1.1  | 0.00119  | 0.00817  | ENSMUSG0000001105  | Gm26843     | lincRNA      | 93646386  | 93687958  | inside       | 26028  | 15346 | shortestDistance |
| chr8 | 94076353  | 94077375  | 1023 | 2.44  | 2.97E-08 | 1.19E-06 | ENSMUSG0000003175  | Bbs2        | protein_codi | 94067954  | 94089828  | inside       | 22064  | 8399  | shortestDistance |
| chr8 | 94089697  | 94090102  | 406  | 1.89  | 1.49E-05 | 0.000231 | ENSMUSG0000003175  | Bbs2        | protein_codi | 94067954  | 94089828  | inside       | 9028   | 8826  | shortestDistance |
| chr8 | 94178756  | 94179377  | 622  | 1.11  | 0.000964 | 0.00693  | ENSMUSG0000003176  | Mt1         | protein_codi | 94179082  | 94180327  | overlapStart | -16    | 295   | shortestDistance |
| chr8 | 94458458  | 94459010  | 553  | 2.97  | 2.18E-09 | 1.26E-07 | ENSMUSG00000007415 | NlrC5       | protein_codi | 94434356  | 94527272  | inside       | 24378  | 24102 | shortestDistance |
| chr8 | 94543969  | 94544408  | 440  | 1.45  | 0.00121  | 0.00827  | ENSMUSG0000003436  | Cpne2       | protein_codi | 94532990  | 94570531  | inside       | 11198  | 10979 | shortestDistance |
| chr8 | 94950152  | 94950425  | 274  | 1.3   | 0.00106  | 0.00747  | ENSMUSG0000006157  | Adgrg5      | protein_codi | 94923694  | 94943280  | downstream   | 26594  | 6872  | shortestDistance |
| chr8 | 95036559  | 95038050  | 1092 | 1.1   | 0.0028   | 0.0159   | ENSMUSG0000006047  | Adgrg3      | protein_codi | 95017692  | 95045250  | inside       | 19812  | 7200  | shortestDistance |
| chr8 | 95046881  | 95047476  | 596  | 1.25  | 0.00124  | 0.00847  | ENSMUSG0000001104  | Gm45757     | TEC          | 95045981  | 95047460  | overlapEnd   | 1197   | 16    | shortestDistance |
| chr8 | 95049632  | 95050053  | 422  | 1.48  | 0.00129  | 0.00875  | ENSMUSG0000001104  | Gm45757     | TEC          | 95045981  | 95047460  | downstream   | 3861   | 2172  | shortestDistance |
| chr8 | 95272917  | 95273306  | 390  | -1.67 | 3.03E-05 | 0.000417 | ENSMUSG0000003178  | Cngb1       | protein_codi | 95239045  | 95306585  | inside       | 33473  | 33279 | shortestDistance |
| chr8 | 95901822  | 95902201  | 380  | 1.22  | 0.00135  | 0.00904  | ENSMUSG0000001106  | Gm45895     | lincRNA      | 95910574  | 95934042  | upstream     | -8562  | 8373  | shortestDistance |
| chr8 | 96426999  | 96427241  | 243  | -1.93 | 1.36E-05 | 0.000214 | ENSMUSG0000001106  | Gm32122     | lincRNA      | 96371727  | 96403862  | upstream     | -23258 | 23137 | shortestDistance |
| chr8 | 96517829  | 96518571  | 743  | -1.36 | 0.000399 | 0.00346  | ENSMUSG0000001483  | 4931428F04f | lincRNA      | 96512340  | 96513979  | downstream   | 5860   | 3850  | shortestDistance |
| chr8 | 96552363  | 96552968  | 606  | -1.11 | 0.00147  | 0.00965  | ENSMUSG0000001107  | 1700047G07  | lincRNA      | 96512340  | 96513979  | downstream   | 40326  | 38384 | shortestDistance |
| chr8 | 96586179  | 96586491  | 313  | -1.29 | 0.000586 | 0.00468  | ENSMUSG0000007793  | Gm24132     | miRNA        | 96656129  | 96656219  | upstream     | -69794 | 69638 | shortestDistance |
| chr8 | 96674475  | 96675056  | 582  | -2.06 | 1.80E-07 | 5.50E-06 | ENSMUSG0000007793  | Gm24132     | miRNA        | 96656129  | 96656219  | downstream   | 18637  | 18256 | shortestDistance |
| chr8 | 102667160 | 102667643 | 484  | -2.17 | 2.34E-05 | 0.000337 | ENSMUSG0000003167  | Cdh11       | protein_codi | 102632095 | 102785642 | inside       | 118240 | 35065 | shortestDistance |
| chr8 | 102784822 | 102785289 | 468  | -1.41 | 0.000316 | 0.00286  | ENSMUSG0000003167  | Cdh11       | protein_codi | 102632095 | 102785642 | inside       | 586    | 353   | shortestDistance |
| chr8 | 104103508 | 104103819 | 312  | -0.96 | 0.00531  | 0.0261   | ENSMUSG0000003187  | Cdh5        | protein_codi | 104101625 | 104144511 | inside       | 2039   | 1883  | shortestDistance |
| chr8 | 104144514 | 104144893 | 380  | 1.81  | 0.000868 | 0.00637  | ENSMUSG0000003187  | Cdh5        | protein_codi | 104101625 | 104144511 | downstream   | 43079  | 3     | shortestDistance |
| chr8 | 104191428 | 104191829 | 402  | -1.54 | 0.000216 | 0.0021   | ENSMUSG0000003187  | Bean1       | protein_codi | 104170442 | 104219122 | inside       | 21186  | 20986 | shortestDistance |
| chr8 | 104232730 | 104233358 | 629  | 1.91  | 1.98E-06 | 4.17E-05 | ENSMUSG0000003582  | T2          | protein_codi | 104226685 | 104248558 | inside       | 15514  | 6045  | shortestDistance |
| chr8 | 104333806 | 104334253 | 448  | 1.09  | 0.00547  | 0.0267   | ENSMUSG0000003578  | Cmtm2b      | protein_codi | 104322230 | 104330764 | downstream   | 11800  | 3042  | shortestDistance |
| chr8 | 104353193 | 104353510 | 318  | -1.09 | 0.00606  | 0.0289   | ENSMUSG0000009618  | Cmtm4       | protein_codi | 104348191 | 104395807 | inside       | 42455  | 5002  | shortestDistance |
| chr8 | 104383859 | 104384454 | 596  | -0.92 | 0.0109   | 0.0452   | ENSMUSG0000009618  | Cmtm4       | protein_codi | 104348191 | 104395807 | inside       | 11651  | 11353 | shortestDistance |
| chr8 | 104973493 | 104973986 | 494  | 3.46  | 8.68E-13 | 1.62E-10 | ENSMUSG0000003187  | Ces2g       | protein_codi | 104961718 | 104969537 | downstream   | 12022  | 3956  | shortestDistance |
| chr8 | 105025130 | 105025406 | 277  | 1.52  | 0.00398  | 0.0209   | ENSMUSG0000009181  | Ces2h       | protein_codi | 105000853 | 105021178 | downstream   | 24415  | 3952  | shortestDistance |
| chr8 | 105283148 | 105283470 | 323  | 1.38  | 0.000403 | 0.00348  | ENSMUSG0000001483  | 4931428F04f | protein_codi | 105280409 | 105289864 | inside       | 6555   | 2739  | shortestDistance |
| chr8 | 105290103 | 105290389 | 287  | 1.11  | 0.000835 | 0.00619  | ENSMUSG0           |             |              |           |           |              |        |       |                  |

|      |           |           |      |       |          |          |                              |              |           |           |              |         |        |                  |
|------|-----------|-----------|------|-------|----------|----------|------------------------------|--------------|-----------|-----------|--------------|---------|--------|------------------|
| chr8 | 108896322 | 108897088 | 767  | -1.1  | 0.0023   | 0.0137   | ENSMUSG0000003887Zfhx3       | protein_codi | 107942644 | 108961630 | inside       | 954061  | 64542  | shortestDistance |
| chr8 | 109019601 | 109019936 | 336  | 1.38  | 0.00184  | 0.0115   | ENSMUSG0000009739D030068K231 | lincRNA      | 109075222 | 109273811 | upstream     | -55454  | 55286  | shortestDistance |
| chr8 | 109455141 | 109455527 | 387  | -1.04 | 0.00335  | 0.0183   | ENSMUSG0000009282Gm23163     | miRNA        | 109425644 | 109425744 | upstream     | -29590  | 29397  | shortestDistance |
| chr8 | 109578759 | 109579523 | 765  | 2.98  | 4.18E-16 | 3.14E-13 | ENSMUSG00000003172Hp         | protein_codi | 109575128 | 109579172 | overlapStart | 31      | 351    | shortestDistance |
| chr8 | 109585655 | 109586160 | 506  | 2.91  | 1.43E-10 | 1.24E-08 | ENSMUSG00000003173Dhdh       | protein_codi | 109591343 | 109608673 | downstream   | 22765   | 5183   | shortestDistance |
| chr8 | 109682046 | 109682976 | 931  | 2.27  | 5.50E-08 | 2.01E-06 | ENSMUSG00000003172Ist1       | protein_codi | 109671325 | 109693260 | inside       | 10749   | 10284  | shortestDistance |
| chr8 | 109687315 | 109687696 | 382  | 1.08  | 0.0124   | 0.05     | ENSMUSG00000003172Ist1       | protein_codi | 109671325 | 109693260 | inside       | 5754    | 5564   | shortestDistance |
| chr8 | 110008921 | 110009264 | 344  | -1.55 | 7.72E-05 | 9.00E-04 | ENSMUSG00000011056Gm45888    | processed_g  | 110011375 | 110014324 | downstream   | 5232    | 2111   | shortestDistance |
| chr8 | 110630658 | 110631143 | 486  | -1.65 | 0.000275 | 0.00255  | ENSMUSG0000001093Vac14       | protein_codi | 110618585 | 110720398 | inside       | 12315   | 12073  | shortestDistance |
| chr8 | 110719334 | 110719682 | 349  | -1.02 | 0.0036   | 0.0193   | ENSMUSG0000001093Vac14       | protein_codi | 110618585 | 110720398 | inside       | 100923  | 716    | shortestDistance |
| chr8 | 110918553 | 110918848 | 296  | 1.02  | 0.00695  | 0.0321   | ENSMUSG0000009738Gm26816     | lincRNA      | 110863229 | 110940314 | inside       | 21614   | 21466  | shortestDistance |
| chr8 | 111551598 | 111552073 | 476  | 2.09  | 6.43E-06 | 0.000114 | ENSMUSG0000003354Znr1f       | protein_codi | 111536097 | 111626030 | inside       | 15739   | 15501  | shortestDistance |
| chr8 | 111562443 | 111562807 | 365  | 2.12  | 6.51E-07 | 1.63E-05 | ENSMUSG0000003354Znr1f       | protein_codi | 111536097 | 111626030 | inside       | 26528   | 26346  | shortestDistance |
| chr8 | 111714614 | 111714895 | 282  | -1.46 | 0.000352 | 0.00312  | ENSMUSG00000003195Bca1       | protein_codi | 111710474 | 111743809 | inside       | 29055   | 4140   | shortestDistance |
| chr8 | 111912681 | 111913538 | 858  | -0.98 | 0.00233  | 0.0139   | ENSMUSG00000003195Tmem231    | protein_codi | 111912011 | 111933881 | inside       | 20771   | 670    | shortestDistance |
| chr8 | 111975986 | 111976874 | 889  | -1.01 | 0.00245  | 0.0144   | ENSMUSG00000003194Ada1       | protein_codi | 111966908 | 111992302 | inside       | 15872   | 9078   | shortestDistance |
| chr8 | 112571535 | 112571804 | 270  | -1.8  | 5.27E-05 | 0.00066  | ENSMUSG00000003177Ctnnpa4    | protein_codi | 112570043 | 112882717 | inside       | 1627    | 1492   | shortestDistance |
| chr8 | 112926878 | 112927338 | 461  | -1.78 | 2.94E-05 | 0.000408 | ENSMUSG00000011045Gm45904    | antisense_RI | 112880460 | 113004997 | inside       | 77889   | 46418  | shortestDistance |
| chr8 | 112933593 | 112934172 | 580  | -1.69 | 0.000104 | 0.00115  | ENSMUSG00000011045Gm45904    | antisense_RI | 112880460 | 113004997 | inside       | 71115   | 53133  | shortestDistance |
| chr8 | 112972413 | 112972971 | 559  | -1.04 | 0.00446  | 0.0228   | ENSMUSG00000011045Gm45904    | antisense_RI | 112880460 | 113004997 | inside       | 32305   | 32026  | shortestDistance |
| chr8 | 113083967 | 113084584 | 618  | -1.67 | 0.00212  | 0.0129   | ENSMUSG00000011054Gm10280    | lincRNA      | 113067262 | 113093334 | inside       | 17014   | 8750   | shortestDistance |
| chr8 | 113183208 | 113183474 | 267  | -1.9  | 0.00579  | 0.0279   | ENSMUSG00000011054Gm10280    | lincRNA      | 113067262 | 113093334 | downstream   | 116079  | 89874  | shortestDistance |
| chr8 | 113374107 | 113374780 | 674  | -1.56 | 0.00131  | 0.00882  | ENSMUSG00000007728Gm25766    | snoRNA       | 113519476 | 113519606 | downstream   | 145162  | 144696 | shortestDistance |
| chr8 | 113438857 | 113439658 | 802  | -0.97 | 0.00271  | 0.0155   | ENSMUSG00000007728Gm25766    | snoRNA       | 113519476 | 113519606 | downstream   | 80348   | 79818  | shortestDistance |
| chr8 | 113753207 | 113753721 | 515  | 1.09  | 0.0113   | 0.0467   | ENSMUSG00000005339Adams178   | protein_codi | 113697126 | 113848738 | inside       | 95274   | 56081  | shortestDistance |
| chr8 | 114018124 | 114018854 | 731  | -0.99 | 0.00311  | 0.0173   | ENSMUSG00000003176Nudt7      | protein_codi | 114133557 | 114154739 | upstream     | -115068 | 114703 | shortestDistance |
| chr8 | 114117518 | 114117821 | 304  | 2.72  | 1.49E-07 | 4.65E-06 | ENSMUSG00000003176Nudt7      | protein_codi | 114133557 | 114154739 | upstream     | -15887  | 15736  | shortestDistance |
| chr8 | 114164606 | 114165089 | 484  | 1.68  | 0.00104  | 0.00735  | ENSMUSG00000003176Nudt7      | protein_codi | 114133557 | 114154739 | downstream   | 31291   | 9867   | shortestDistance |
| chr8 | 114418546 | 114418851 | 306  | 3.25  | 2.26E-10 | 1.84E-08 | ENSMUSG0000000887Clec3a      | protein_codi | 114418086 | 114425846 | inside       | 612     | 460    | shortestDistance |
| chr8 | 114418930 | 114419335 | 406  | 2.22  | 3.98E-08 | 1.52E-06 | ENSMUSG0000000887Clec3a      | protein_codi | 114418086 | 114425846 | inside       | 1046    | 844    | shortestDistance |
| chr8 | 114455875 | 114456462 | 588  | -1.6  | 3.41E-05 | 0.000461 | ENSMUSG0000000463Wwox        | protein_codi | 114439655 | 115352708 | inside       | 16513   | 16220  | shortestDistance |
| chr8 | 114591319 | 114591692 | 374  | 2.2   | 6.75E-08 | 2.38E-06 | ENSMUSG00000009021Gm16116    | antisense_RI | 114591303 | 114594900 | inside       | 3394    | 16     | shortestDistance |
| chr8 | 114594807 | 114595231 | 425  | 1.96  | 1.38E-06 | 3.06E-05 | ENSMUSG00000009021Gm16116    | antisense_RI | 114591303 | 114594900 | overlapStart | -119    | 93     | shortestDistance |
| chr8 | 114615883 | 114616396 | 514  | 3.32  | 1.86E-14 | 6.93E-12 | ENSMUSG0000000463Wwox        | protein_codi | 114439655 | 115352708 | inside       | 176485  | 176228 | shortestDistance |
| chr8 | 114715782 | 114715989 | 208  | 1.55  | 0.00895  | 0.039    | ENSMUSG0000000463Wwox        | protein_codi | 114439655 | 115352708 | inside       | 276231  | 276127 | shortestDistance |
| chr8 | 114810355 | 114810899 | 545  | 1.36  | 0.0014   | 0.0093   | ENSMUSG0000000463Wwox        | protein_codi | 114439655 | 115352708 | inside       | 370972  | 370700 | shortestDistance |
| chr8 | 114831608 | 114832043 | 436  | 3.01  | 1.53E-10 | 1.31E-08 | ENSMUSG0000000463Wwox        | protein_codi | 114439655 | 115352708 | inside       | 392171  | 391953 | shortestDistance |
| chr8 | 114832252 | 114833054 | 803  | 3.56  | 4.22E-18 | 9.24E-15 | ENSMUSG0000000463Wwox        | protein_codi | 114439655 | 115352708 | inside       | 392998  | 392597 | shortestDistance |
| chr8 | 114847677 | 114848067 | 391  | 3.61  | 4.20E-14 | 1.33E-11 | ENSMUSG0000000463Wwox        | protein_codi | 114439655 | 115352708 | inside       | 408217  | 408022 | shortestDistance |
| chr8 | 115018611 | 115018846 | 236  | -1.72 | 0.00032  | 0.00289  | ENSMUSG0000000463Wwox        | protein_codi | 114439655 | 115352708 | inside       | 579073  | 333862 | shortestDistance |
| chr8 | 115226684 | 115227709 | 1026 | 2.45  | 2.84E-13 | 6.53E-11 | ENSMUSG0000000463Wwox        | protein_codi | 114439655 | 115352708 | inside       | 787541  | 124999 | shortestDistance |
| chr8 | 115276123 | 115276731 | 609  | 2.45  | 4.91E-10 | 3.50E-08 | ENSMUSG0000000463Wwox        | protein_codi | 114439655 | 115352708 | inside       | 836772  | 75977  | shortestDistance |
| chr8 | 115423015 | 115423466 | 452  | 3.13  | 6.08E-11 | 6.04E-09 | ENSMUSG0000000463Wwox        | protein_codi | 114439655 | 115352708 | downstream   | 983585  | 70307  | shortestDistance |
| chr8 | 115423692 | 115424018 | 327  | 2.43  | 4.29E-08 | 1.62E-06 | ENSMUSG0000000463Wwox        | protein_codi | 114439655 | 115352708 | downstream   | 984200  | 70984  | shortestDistance |
| chr8 | 115427389 | 115427751 | 363  | 1.93  | 3.16E-05 | 0.000433 | ENSMUSG0000000463Wwox        | protein_codi | 114439655 | 115352708 | downstream   | 987915  | 74681  | shortestDistance |
| chr8 | 115428056 | 115428367 | 312  | 3.37  | 5.33E-13 | 1.10E-10 | ENSMUSG0000000463Wwox        | protein_codi | 114439655 | 115352708 | downstream   | 988557  | 75348  | shortestDistance |
| chr8 | 115444557 | 115444936 | 380  | 3.85  | 2.32E-12 | 3.73E-10 | ENSMUSG0000000463Wwox        | protein_codi | 114439655 | 115352708 | downstream   | 1005091 | 91849  | shortestDistance |
| chr8 | 115486274 | 115487455 | 732  | 1.19  | 0.00184  | 0.0115   | ENSMUSG00000110594930488N15  | lincRNA      | 115585392 | 115595152 | upstream     | -98302  | 79737  | shortestDistance |
| chr8 | 115539570 | 115540063 | 494  | 2.25  | 5.55E-07 | 1.42E-05 | ENSMUSG00000110594930488N15  | lincRNA      | 115585392 | 115595152 | upstream     | -45576  | 45329  | shortestDistance |
| chr8 | 115581941 | 115582679 | 739  | 2.01  | 9.02E-06 | 0.000151 | ENSMUSG00000110594930488N15  | lincRNA      | 115585392 | 115595152 | upstream     | -3082   | 2713   | shortestDistance |
| chr8 | 115616963 | 115617240 | 278  | -2.07 | 0.00012  | 0.0013   | ENSMUSG00000110594930488N15  | lincRNA      | 115585392 | 115595152 | downstream   | 31710   | 2181   | shortestDistance |
| chr8 | 115718539 | 115719000 | 462  | 3.52  | 1.13E-13 | 3.05E-11 | ENSMUSG00000005543Maf        | protein_codi | 115682942 | 115707794 | upstream     | -10976  | 10745  | shortestDistance |
| chr8 | 115778457 | 115778743 | 287  | 1.81  | 7.85E-05 | 0.000913 | ENSMUSG00000005543Maf        | protein_codi | 115682942 | 115707794 | upstream     | -70806  | 70663  | shortestDistance |
| chr8 | 116478698 | 116478990 | 293  | 1.41  | 0.000302 | 0.00276  | ENSMUSG0000011070Gm5357      | processed_g  | 116489186 | 116491109 | upstream     | -10342  | 10196  | shortestDistance |
| chr8 | 116543459 | 116543680 | 222  | 2.66  | 3.37E-06 | 6.55E-05 | ENSMUSG00000003446Dnrlb2     | protein_codi | 116504974 | 116515915 | downstream   | 38596   | 27544  | shortestDistance |
| chr8 | 116552151 | 116552582 | 432  | -1.7  | 0.000232 | 0.00222  | ENSMUSG00000003175Cdy2       | protein_codi | 116574400 | 116732991 | downstream   | 180625  | 21818  | shortestDistance |
| chr8 | 116581180 | 116581666 | 487  | 2.25  | 8.50E-08 | 2.91E-06 | ENSMUSG00000003175Cdy2       | protein_codi | 116574400 | 116732991 | inside       | 151568  | 6780   | shortestDistance |
| chr8 | 116581730 | 116581990 | 261  | 2.56  | 5.93E-07 | 1.51E-05 | ENSMUSG00000003175Cdy2       | protein_codi | 116574400 | 116732991 | inside       | 151131  | 7330   | shortestDistance |
| chr8 | 116620029 | 116620508 | 480  | 2.88  | 1.24E-08 | 5.66E-07 | ENSMUSG00000003175Cdy2       | protein_codi | 116574400 | 116732991 | inside       | 112723  | 45629  | shortestDistance |
| chr8 | 116627773 | 116628778 | 1006 | 2.22  | 5.01E-09 | 2.54E-07 | ENSMUSG00000003175Cdy2       | protein_codi | 116574400 | 116732991 | inside       | 104715  | 53373  | shortestDistance |
| chr8 | 116635857 | 116636492 | 636  | 1.5   | 0.00299  | 0.0167   | ENSMUSG00000003175Cdy2       | protein_codi | 116574400 | 116732991 | inside       | 96817   | 61457  | shortestDistance |
| chr8 | 116790346 | 116790651 | 306  | 2.98  | 6.07E-06 | 0.000108 | ENSMUSG00000007407Gm10620    | pseudogene   | 116764144 | 116765479 | upstream     | -25019  | 24867  | shortestDistance |
| chr8 | 116795374 | 116796119 | 386  | 2.34  | 1.23E-07 | 3.96E-06 | ENSMUSG00000007407Gm10620    | pseudogene   | 116764144 | 116765479 | upstream     | -30447  | 30255  | shortestDistance |
| chr8 | 116863359 | 116863969 | 611  | -0.88 | 0.00932  | 0.0402   | ENSMUSG00000001463Cmc2       | protein_codi | 116888685 | 116921455 | downstream   | 57791   | 24716  | shortestDistance |
| chr8 | 117079650 | 117080014 | 455  | 3.83  | 1.28E-15 | 7.66E-13 | ENSMUSG00000003441Pkd1l2     | protein_codi | 116995679 | 117082449 | inside       | 2572    | 2345   | shortestDistance |
| chr8 | 117126444 | 117126830 | 387  | 1.66  | 0.000166 | 0.0017   | ENSMUSG00000003184Bco1       | protein_codi | 117095854 | 117133720 | inside       | 30783   | 6890   | shortestDistance |
| chr8 | 117127148 | 117127553 | 406  | 1.36  | 0.000915 | 0.00664  | ENSMUSG00000003184Bco1       | protein_codi | 117095854 | 117133720 | inside       | 31496   | 6167   | shortestDistance |
| chr8 | 117183665 | 117184328 | 664  | 1.52  | 9.76E-05 | 0.00109  | ENSMUSG00000005255Gan        | protein_codi | 117158135 | 117215997 | inside       | 25861   | 25530  | shortestDistance |
| chr8 | 117280364 | 117280725 | 362  | 1.99  | 1.26E-06 | 2.84E-05 | ENSMUSG00000003439Cmp1       | protein_codi | 117257064 | 117459430 | inside       | 23480   | 23300  | shortestDistance |
| chr8 | 117305393 | 117305751 | 359  | 1.31  | 0.00115  | 0.00799  | ENSMUSG00000003439Cmp1       | protein_codi | 117257064 | 117459430 | inside       | 48508   | 48329  | shortestDistance |
| chr8 | 117342969 | 11734333  |      |       |          |          |                              |              |           |           |              |         |        |                  |

|      |            |           |      |       |          |          |                                    |              |           |           |              |         |         |                  |
|------|------------|-----------|------|-------|----------|----------|------------------------------------|--------------|-----------|-----------|--------------|---------|---------|------------------|
| chr8 | 121570187  | 121571195 | 1009 | 1.77  | 1.38E-06 | 3.07E-05 | ENSMUSG00000005293Fbxo31           | protein_codi | 121549440 | 121578806 | inside       | 8115    | 7611    | shortestDistance |
| chr8 | 121578418  | 121579516 | 1099 | 0.85  | 0.00851  | 0.0375   | ENSMUSG00000005293Fbxo31           | protein_codi | 121549440 | 121578806 | overlapStart | -161    | 388     | shortestDistance |
| chr8 | 121652719  | 121653185 | 467  | 1.09  | 0.00698  | 0.0322   | ENSMUSG00000006141Zcchc14          | protein_codi | 121598703 | 121652901 | overlapStart | -51     | 182     | shortestDistance |
| chr8 | 121751465  | 121751772 | 308  | 1.6   | 0.000123 | 0.00132  | ENSMUSG00000002531Jph3             | protein_codi | 121729623 | 121794276 | inside       | 21995   | 21842   | shortestDistance |
| chr8 | 121761473  | 121761829 | 357  | 1.55  | 0.000232 | 0.00223  | ENSMUSG00000002531Jph3             | protein_codi | 121729623 | 121794276 | inside       | 32028   | 31850   | shortestDistance |
| chr8 | 121792060  | 121792910 | 851  | 1.47  | 6.89E-06 | 0.000121 | ENSMUSG00000002531Jph3             | protein_codi | 121729623 | 121794276 | inside       | 62862   | 1366    | shortestDistance |
| chr8 | 121848520  | 121848897 | 378  | 1.81  | 8.28E-06 | 0.000141 | ENSMUSG00000009232Gm20388          | protein_codi | 119910841 | 124345722 | inside       | 1937867 | 1937679 | shortestDistance |
| chr8 | 121877177  | 121877685 | 509  | 1.61  | 6.50E-05 | 0.000786 | ENSMUSG00000009232Gm20388          | protein_codi | 119910841 | 124345722 | inside       | 1966590 | 1966336 | shortestDistance |
| chr8 | 121898147  | 121899031 | 885  | 0.84  | 0.00806  | 0.0361   | ENSMUSG00000004001Slc7a5           | protein_codi | 121881150 | 121907694 | inside       | 9105    | 8663    | shortestDistance |
| chr8 | 121925712  | 121925930 | 219  | 1.79  | 0.00171  | 0.0109   | ENSMUSG00000002531Car5a            | protein_codi | 121916126 | 121944904 | inside       | 19083   | 9586    | shortestDistance |
| chr8 | 122021794  | 122022628 | 835  | 0.91  | 0.00694  | 0.0321   | ENSMUSG00000002531Bapn             | protein_codi | 121949750 | 122029258 | inside       | 72461   | 6630    | shortestDistance |
| chr8 | 122035458  | 122035992 | 535  | 1.07  | 0.00237  | 0.014    | ENSMUSG00000009232Gm20388          | protein_codi | 119910841 | 124345722 | inside       | 2124884 | 2124617 | shortestDistance |
| chr8 | 122484730  | 122485317 | 588  | 2.8   | 5.07E-07 | 1.32E-05 | ENSMUSG00000001444Piezo1           | protein_codi | 122481698 | 122551329 | inside       | 66305   | 3032    | shortestDistance |
| chr8 | 122498012  | 122498250 | 239  | 1.78  | 0.00107  | 0.00754  | ENSMUSG00000001444Piezo1           | protein_codi | 122481698 | 122551329 | inside       | 53198   | 16314   | shortestDistance |
| chr8 | 122627044  | 122627362 | 319  | -1.34 | 0.0015   | 0.00981  | ENSMUSG0000000636Cfb2a1            | protein_codi | 122625141 | 122699109 | inside       | 71906   | 1903    | shortestDistance |
| chr8 | 122898481  | 122898895 | 415  | 2.61  | 6.29E-08 | 2.24E-06 | ENSMUSG000000011044Gm45894         | antisense_RI | 122870174 | 122901457 | inside       | 28514   | 2562    | shortestDistance |
| chr8 | 122932319  | 122932944 | 626  | 1.57  | 3.46E-05 | 0.000466 | ENSMUSG00000003556Ankrd11          | protein_codi | 122883822 | 123042277 | inside       | 109645  | 48497   | shortestDistance |
| chr8 | 122987416  | 122987650 | 235  | 1.74  | 0.000538 | 0.00437  | ENSMUSG00000003556Ankrd11          | protein_codi | 122883822 | 123042277 | inside       | 54744   | 54627   | shortestDistance |
| chr8 | 122989053  | 122989277 | 225  | 1.66  | 0.00471  | 0.0238   | ENSMUSG00000003556Ankrd11          | protein_codi | 122883822 | 123042277 | inside       | 53112   | 53000   | shortestDistance |
| chr8 | 123100284  | 123100648 | 365  | 2.61  | 1.52E-08 | 6.75E-07 | ENSMUSG00000009232Gm20388          | protein_codi | 119910841 | 124345722 | inside       | 3189625 | 1245074 | shortestDistance |
| chr8 | 123280313  | 123281090 | 778  | 2.93  | 1.35E-09 | 8.26E-08 | ENSMUSG00000003281Fanca            | protein_codi | 123268300 | 123318576 | inside       | 37874   | 12013   | shortestDistance |
| chr8 | 123653598  | 123654346 | 749  | 0.95  | 0.00882  | 0.0386   | ENSMUSG00000003996Rhou             | protein_codi | 123653929 | 123663884 | overlapStart | 43      | 331     | shortestDistance |
| chr8 | 123672614  | 123673029 | 416  | 1.24  | 0.00127  | 0.00865  | ENSMUSG00000009232Gm20388          | protein_codi | 119910841 | 124345722 | inside       | 3761981 | 672693  | shortestDistance |
| chr8 | 123750133  | 123750701 | 569  | 2.66  | 1.32E-08 | 5.95E-07 | ENSMUSG000000097204732419C18lncRNA | lncRNA       | 123744631 | 123754726 | inside       | 4309    | 4025    | shortestDistance |
| chr8 | 124240911  | 124241350 | 440  | 3.26  | 1.42E-09 | 8.65E-08 | ENSMUSG00000008970Galnt2           | protein_codi | 124231391 | 124345724 | inside       | 9739    | 9520    | shortestDistance |
| chr8 | 124250696  | 124251200 | 505  | 2.87  | 7.24E-12 | 1.01E-09 | ENSMUSG00000008970Galnt2           | protein_codi | 124231391 | 124345724 | inside       | 19557   | 19305   | shortestDistance |
| chr8 | 124260618  | 124260698 | 530  | 1.23  | 0.00077  | 0.0058   | ENSMUSG00000008970Galnt2           | protein_codi | 124231391 | 124345724 | inside       | 29043   | 28778   | shortestDistance |
| chr8 | 124793173  | 124793610 | 438  | 1.01  | 0.00242  | 0.0143   | ENSMUSG00000003691Trim67           | protein_codi | 124793092 | 124834713 | inside       | 300     | 81      | shortestDistance |
| chr8 | 124794043  | 124794794 | 752  | 1.18  | 0.00147  | 0.00967  | ENSMUSG00000003691Trim67           | protein_codi | 124793092 | 124834713 | inside       | 1326    | 951     | shortestDistance |
| chr8 | 124826624  | 124826964 | 341  | 2.32  | 1.12E-06 | 2.57E-05 | ENSMUSG00000003691Trim67           | protein_codi | 124793092 | 124834713 | inside       | 33702   | 7749    | shortestDistance |
| chr8 | 124830014  | 124830398 | 385  | 3.14  | 6.74E-10 | 4.63E-08 | ENSMUSG00000003691Trim67           | protein_codi | 124793092 | 124834713 | inside       | 37114   | 4315    | shortestDistance |
| chr8 | 124911959  | 124912384 | 426  | 1.58  | 0.000781 | 0.00586  | ENSMUSG00000003198Egln1            | protein_codi | 124908587 | 124949324 | inside       | 37152   | 3372    | shortestDistance |
| chr8 | 124921804  | 124922328 | 525  | 1.3   | 0.000223 | 0.00216  | ENSMUSG00000003198Egln1            | protein_codi | 124908587 | 124949324 | inside       | 27258   | 13217   | shortestDistance |
| chr8 | 124949025  | 124949804 | 780  | 1.12  | 0.00106  | 0.00747  | ENSMUSG00000003198Egln1            | protein_codi | 124908587 | 124949324 | overlapStart | -90     | 299     | shortestDistance |
| chr8 | 125068187  | 125068453 | 267  | 2.02  | 1.59E-06 | 3.48E-05 | ENSMUSG00000003505Disc1            | protein_codi | 125054195 | 125261858 | inside       | 14125   | 13992   | shortestDistance |
| chr8 | 125224526  | 125224772 | 247  | 1.47  | 0.000476 | 0.00398  | ENSMUSG00000008669Gm16237          | antisense_RI | 125224400 | 125227323 | inside       | 2674    | 126     | shortestDistance |
| chr8 | 125385460  | 125386066 | 607  | 1.79  | 2.11E-06 | 4.41E-05 | ENSMUSG00000001995Sipa12           | protein_codi | 125418063 | 125569808 | downstream   | 184045  | 31997   | shortestDistance |
| chr8 | 125531654  | 125532058 | 405  | 1.28  | 0.000447 | 0.00378  | ENSMUSG00000001995Sipa12           | protein_codi | 125418063 | 125569808 | inside       | 37952   | 37750   | shortestDistance |
| chr8 | 125543163  | 125543588 | 426  | 1.32  | 0.00185  | 0.0116   | ENSMUSG00000001995Sipa12           | protein_codi | 125418063 | 125569808 | inside       | 26432   | 26220   | shortestDistance |
| chr8 | 125558525  | 125558983 | 459  | 0.95  | 0.00543  | 0.0266   | ENSMUSG00000001995Sipa12           | protein_codi | 125418063 | 125569808 | inside       | 11054   | 10825   | shortestDistance |
| chr8 | 125568333  | 125568777 | 445  | 1.42  | 8.40E-05 | 0.000964 | ENSMUSG00000001995Sipa12           | protein_codi | 125418063 | 125569808 | inside       | 1253    | 1031    | shortestDistance |
| chr8 | 125569545  | 125570447 | 903  | 0.86  | 0.00853  | 0.0376   | ENSMUSG00000001995Sipa12           | protein_codi | 125418063 | 125569808 | overlapStart | -188    | 263     | shortestDistance |
| chr8 | 125646896  | 125646988 | 933  | 1.75  | 4.99E-07 | 1.30E-05 | ENSMUSG0000000593Map10             | protein_codi | 125669818 | 125673359 | upstream     | -20386  | 19920   | shortestDistance |
| chr8 | 125724909  | 125725672 | 764  | 1.33  | 7.89E-05 | 0.000916 | ENSMUSG00000003185Ntpr             | protein_codi | 125729963 | 125748235 | upstream     | -4673   | 4291    | shortestDistance |
| chr8 | 125733989  | 125734952 | 964  | 0.8   | 0.0103   | 0.0434   | ENSMUSG00000003185Ntpr             | protein_codi | 125729963 | 125748235 | inside       | 4507    | 4026    | shortestDistance |
| chr8 | 125741415  | 125742192 | 778  | 0.86  | 0.00884  | 0.0386   | ENSMUSG00000003185Ntpr             | protein_codi | 125729963 | 125748235 | inside       | 11841   | 6043    | shortestDistance |
| chr8 | 125776804  | 125777204 | 401  | 2.91  | 4.65E-10 | 3.35E-08 | ENSMUSG00000006021Pcnx2            | protein_codi | 125751508 | 125898317 | inside       | 121313  | 25296   | shortestDistance |
| chr8 | 125845124  | 125845709 | 586  | 4.31  | 1.14E-18 | 3.18E-15 | ENSMUSG00000006021Pcnx2            | protein_codi | 125751508 | 125898317 | inside       | 52901   | 52608   | shortestDistance |
| chr8 | 1258770839 | 125877445 | 607  | 1.12  | 0.00498  | 0.0248   | ENSMUSG00000006021Pcnx2            | protein_codi | 125751508 | 125898317 | inside       | 27175   | 26872   | shortestDistance |
| chr8 | 125955734  | 125955967 | 234  | 1.43  | 0.00273  | 0.0156   | ENSMUSG00000003185Map3k21          | protein_codi | 125910450 | 125947440 | downstream   | 45400   | 8294    | shortestDistance |
| chr8 | 126422020  | 126423179 | 1160 | 0.76  | 0.0105   | 0.0441   | ENSMUSG00000005167Coa6             | protein_codi | 126422515 | 126425433 | overlapStart | 85      | 495     | shortestDistance |
| chr8 | 126481762  | 126482049 | 324  | 1.84  | 1.67E-05 | 0.000254 | ENSMUSG00000007402Gm6091           | processed_p  | 126476248 | 126476412 | upstream     | -5476   | 5314    | shortestDistance |
| chr8 | 1265550807 | 126551465 | 659  | 1.1   | 0.00163  | 0.0105   | ENSMUSG00000009706Gm26759          | antisense_RI | 126566970 | 126590988 | upstream     | -15834  | 15505   | shortestDistance |
| chr8 | 126565242  | 126565653 | 412  | 2.23  | 8.53E-08 | 2.91E-06 | ENSMUSG00000009706Gm26759          | antisense_RI | 126566970 | 126590988 | upstream     | -1552   | 1317    | shortestDistance |
| chr8 | 126585549  | 126586073 | 525  | 1.81  | 6.00E-07 | 1.52E-05 | ENSMUSG00000009706Gm26759          | antisense_RI | 126566970 | 126590988 | inside       | 18841   | 4915    | shortestDistance |
| chr8 | 126593781  | 126594273 | 493  | 1.17  | 0.000466 | 0.00391  | ENSMUSG000000051491rfzbp2          | protein_codi | 126588296 | 126593986 | overlapStart | -41     | 205     | shortestDistance |
| chr8 | 126594402  | 126594945 | 544  | 0.9   | 0.00486  | 0.0243   | ENSMUSG000000051491rfzbp2          | protein_codi | 126588296 | 126593986 | upstream     | -688    | 416     | shortestDistance |
| chr8 | 126596231  | 126596611 | 381  | 1.17  | 0.000498 | 0.00411  | ENSMUSG000000051491rfzbp2          | protein_codi | 126588296 | 126593986 | upstream     | -2435   | 2245    | shortestDistance |
| chr8 | 126614229  | 126614978 | 750  | 1.37  | 0.000798 | 0.00596  | ENSMUSG000000051491rfzbp2          | protein_codi | 126588296 | 126593986 | upstream     | -20618  | 20243   | shortestDistance |
| chr8 | 126665664  | 126666158 | 495  | 1.16  | 0.0013   | 0.0088   | ENSMUSG000000051491rfzbp2          | protein_codi | 126588296 | 126593986 | upstream     | -71925  | 71678   | shortestDistance |
| chr8 | 126666271  | 126667268 | 998  | 0.82  | 0.00877  | 0.0384   | ENSMUSG000000051491rfzbp2          | protein_codi | 126588296 | 126593986 | upstream     | -72784  | 72285   | shortestDistance |
| chr8 | 126683607  | 126684348 | 742  | 1.57  | 2.47E-05 | 0.000352 | ENSMUSG000000011062Gm45805         | lncRNA       | 126755571 | 126758334 | downstream   | 74356   | 71223   | shortestDistance |
| chr8 | 126695457  | 126695835 | 379  | 1.53  | 0.000257 | 0.00242  | ENSMUSG000000011062Gm45805         | lncRNA       | 126755571 | 126758334 | downstream   | 62688   | 59736   | shortestDistance |
| chr8 | 126702275  | 126702920 | 646  | 3.51  | 1.45E-14 | 5.61E-12 | ENSMUSG000000011062Gm45805         | lncRNA       | 126755571 | 126758334 | downstream   | 55736   | 52651   | shortestDistance |
| chr8 | 126704630  | 126705100 | 471  | 0.91  | 0.00725  | 0.0332   | ENSMUSG000000011062Gm45805         | lncRNA       | 126755571 | 126758334 | downstream   | 53469   | 50471   | shortestDistance |
| chr8 | 126705414  | 126705754 | 341  | 1.19  | 0.00918  | 0.0398   | ENSMUSG000000011062Gm45805         | lncRNA       | 126755571 | 126758334 | downstream   | 52750   | 49817   | shortestDistance |
| chr8 | 126720514  | 126721182 | 669  | 1.81  | 5.33E-06 | 9.71E-05 | ENSMUSG000000011062Gm45805         | lncRNA       | 126755571 | 126758334 | downstream   | 37486   | 34389   | shortestDistance |
| chr8 | 126755693  | 126756115 | 423  | 1.13  | 0.00118  | 0.00815  | ENSMUSG000000011062Gm45805         | lncRNA       | 126755571 | 126758334 | inside       | 2430    | 122     | shortestDistance |
| chr8 | 126757736  | 126758607 | 872  | 1.1   | 0.00106  | 0.00748  | ENSMUSG000000011062Gm45805         | lncRNA       | 126755571 | 126758334 | overlapStart | 162     | 273     | shortestDistance |
| chr8 | 126763470  | 126764082 | 613  | 1.54  | 2.84E-05 | 0.000395 | ENSMUSG000000011062Gm45805         | lncRNA       | 126755571 | 126758334 | upstream     | -5442   | 5136    | shortestDistance |
| chr8 | 126778698  | 126779041 |      |       |          |          |                                    |              |           |           |              |         |         |                  |

|      |           |           |      |       |          |          |                               |               |           |           |              |         |        |                  |
|------|-----------|-----------|------|-------|----------|----------|-------------------------------|---------------|-----------|-----------|--------------|---------|--------|------------------|
| chr8 | 128523873 | 128524097 | 225  | 1.54  | 0.00313  | 0.0174   | ENSMUSG0000002581Nrp1         | protein_codi  | 128358604 | 128503363 | downstream   | 165381  | 20510  | shortestDistance |
| chr8 | 128559189 | 128559696 | 508  | 2.45  | 5.43E-10 | 3.82E-08 | ENSMUSG0000002581Nrp1         | protein_codi  | 128358604 | 128503363 | downstream   | 200838  | 55826  | shortestDistance |
| chr8 | 128594152 | 128594487 | 336  | 1.35  | 0.000284 | 0.00262  | ENSMUSG00000011065Gm9204      | processed_p   | 128633936 | 128634882 | upstream     | -39616  | 39449  | shortestDistance |
| chr8 | 128663117 | 128663525 | 409  | -1.66 | 0.000226 | 0.00218  | ENSMUSG00000011065Gm45746     | TEC           | 128654313 | 128656759 | downstream   | 9008    | 6358   | shortestDistance |
| chr9 | 3199436   | 3200208   | 773  | -1.76 | 3.16E-05 | 0.000432 | ENSMUSG0000004236A930433N12   | processed_tr  | 3133847   | 3199799   | overlapStart | -23     | 363    | shortestDistance |
| chr9 | 3334962   | 3336199   | 1238 | -0.87 | 0.00278  | 0.0158   | ENSMUSG0000002589Alkbh8       | protein_codi  | 3335140   | 3391154   | overlapStart | 440     | 178    | shortestDistance |
| chr9 | 3531452   | 3531983   | 532  | -1.39 | 0.000152 | 0.00157  | ENSMUSG00000004162Gucy1a2     | protein_codi  | 3532778   | 3894736   | upstream     | -1060   | 795    | shortestDistance |
| chr9 | 3532116   | 3533371   | 1256 | -1.3  | 0.000243 | 0.00231  | ENSMUSG00000004162Gucy1a2     | protein_codi  | 3532778   | 3894736   | overlapStart | -34     | 593    | shortestDistance |
| chr9 | 4319345   | 4319765   | 421  | 2.66  | 3.99E-09 | 2.10E-07 | ENSMUSG0000002589Kbtbd3       | protein_codi  | 4309833   | 4331732   | inside       | 9722    | 9512   | shortestDistance |
| chr9 | 4375920   | 4377093   | 1174 | -0.98 | 0.000977 | 0.007    | ENSMUSG00000004112Msahtd4     | protein_codi  | 4376562   | 4386870   | overlapStart | -56     | 531    | shortestDistance |
| chr9 | 4442887   | 4443436   | 550  | -0.92 | 0.0029   | 0.0164   | ENSMUSG0000002589Gria4        | protein_codi  | 4417896   | 4796234   | inside       | 353072  | 24991  | shortestDistance |
| chr9 | 4536777   | 4537091   | 315  | -1.6  | 2.52E-05 | 0.000357 | ENSMUSG0000002589Gria4        | protein_codi  | 4417896   | 4796234   | inside       | 259300  | 118881 | shortestDistance |
| chr9 | 4555477   | 4555937   | 461  | -2.03 | 8.65E-07 | 2.08E-05 | ENSMUSG0000002589Gria4        | protein_codi  | 4417896   | 4796234   | inside       | 240527  | 137581 | shortestDistance |
| chr9 | 4796014   | 4796435   | 422  | -1.94 | 3.53E-06 | 6.83E-05 | ENSMUSG0000002589Gria4        | protein_codi  | 4417896   | 4796234   | overlapStart | 10      | 201    | shortestDistance |
| chr9 | 5344130   | 5344470   | 341  | -1.11 | 0.00138  | 0.00917  | ENSMUSG0000002588Casp12       | protein_codi  | 5345430   | 5373032   | upstream     | -1130   | 960    | shortestDistance |
| chr9 | 5345357   | 5345621   | 265  | -1.18 | 0.000983 | 0.00704  | ENSMUSG0000002588Casp12       | protein_codi  | 5345430   | 5373032   | overlapStart | 59      | 73     | shortestDistance |
| chr9 | 5498336   | 5498654   | 319  | -1.28 | 0.0021   | 0.0128   | ENSMUSG0000002588Casp12       | protein_codi  | 5345430   | 5373032   | downstream   | 153065  | 125304 | shortestDistance |
| chr9 | 5542674   | 5542932   | 259  | -1.85 | 1.91E-05 | 0.000283 | ENSMUSG0000002588Casp12       | protein_codi  | 5345430   | 5373032   | downstream   | 197373  | 169642 | shortestDistance |
| chr9 | 5595929   | 5596722   | 794  | -2.11 | 3.80E-07 | 1.04E-05 | ENSMUSG00000011092AC13261.1   | processed_p   | 5796779   | 5797033   | upstream     | -200453 | 200057 | shortestDistance |
| chr9 | 5634992   | 5635348   | 357  | -1.85 | 1.05E-07 | 3.46E-06 | ENSMUSG00000011092AC13261.1   | processed_p   | 5796779   | 5797033   | upstream     | -161609 | 161431 | shortestDistance |
| chr9 | 6089717   | 6090429   | 713  | -1.82 | 6.82E-07 | 1.70E-05 | ENSMUSG00000011170Gm9662      | processed_p   | 6070313   | 6074278   | downstream   | 19760   | 15439  | shortestDistance |
| chr9 | 6167955   | 6168949   | 995  | -1.49 | 2.28E-05 | 0.00033  | ENSMUSG00000003200Pdgfr       | protein_codi  | 6168584   | 6378850   | overlapStart | -132    | 365    | shortestDistance |
| chr9 | 6168989   | 6169348   | 360  | -1.95 | 8.63E-08 | 2.94E-06 | ENSMUSG00000003200Pdgfr       | protein_codi  | 6168584   | 6378850   | inside       | 584     | 405    | shortestDistance |
| chr9 | 6277431   | 6277795   | 365  | -1.46 | 0.00253  | 0.0147   | ENSMUSG00000003200Pdgfr       | protein_codi  | 6168584   | 6378850   | inside       | 109029  | 101055 | shortestDistance |
| chr9 | 6344892   | 6345192   | 301  | -2.58 | 1.70E-07 | 5.23E-06 | ENSMUSG00000003200Pdgfr       | protein_codi  | 6168584   | 6378850   | inside       | 176458  | 33658  | shortestDistance |
| chr9 | 6401390   | 6402279   | 890  | -1.43 | 0.00012  | 0.00129  | ENSMUSG00000003200Pdgfr       | protein_codi  | 6168584   | 6378850   | downstream   | 233250  | 22540  | shortestDistance |
| chr9 | 6547185   | 6547568   | 384  | -1.33 | 0.00103  | 0.00728  | ENSMUSG00000011125Gm21089     | processed_p   | 6594237   | 6594561   | upstream     | -46861  | 46669  | shortestDistance |
| chr9 | 6668207   | 6668798   | 592  | -2.11 | 4.55E-07 | 1.21E-05 | ENSMUSG00000011073AC167721.1  | processed_p   | 6665497   | 6665775   | upstream     | -2727   | 2432   | shortestDistance |
| chr9 | 7176437   | 7177242   | 806  | -1.15 | 0.000142 | 0.00149  | ENSMUSG00000004719Dync2h1     | protein_codi  | 6928503   | 7184446   | inside       | 7606    | 7204   | shortestDistance |
| chr9 | 7331770   | 7332221   | 452  | 2.41  | 3.66E-09 | 1.95E-07 | ENSMUSG00000004972Mmp12       | protein_codi  | 7344381   | 7369499   | upstream     | -12385  | 12160  | shortestDistance |
| chr9 | 7345440   | 7345889   | 450  | 1.42  | 0.000824 | 0.00613  | ENSMUSG00000004972Mmp12       | protein_codi  | 7344381   | 7369499   | inside       | 1283    | 1059   | shortestDistance |
| chr9 | 7558041   | 7558595   | 555  | 1.32  | 0.00117  | 0.00809  | ENSMUSG00000000588Mmp8        | protein_codi  | 7558456   | 7568485   | overlapStart | -138    | 139    | shortestDistance |
| chr9 | 7572276   | 7573339   | 1064 | -1.31 | 0.000337 | 0.00302  | ENSMUSG00000007032Mmp27       | protein_codi  | 7571396   | 7581885   | inside       | 1412    | 880    | shortestDistance |
| chr9 | 7594893   | 7595633   | 741  | -1.03 | 0.00178  | 0.0113   | ENSMUSG00000011176AL03630.1   | processed_p   | 7599494   | 7599640   | upstream     | -4231   | 3861   | shortestDistance |
| chr9 | 7788892   | 7789457   | 566  | -1.28 | 0.000591 | 0.00471  | ENSMUSG00000000719Tmem123     | protein_codi  | 7764041   | 7794333   | inside       | 25133   | 4876   | shortestDistance |
| chr9 | 7829581   | 7830225   | 645  | -1.18 | 0.000724 | 0.00553  | ENSMUSG00000005736Bir2c       | protein_codi  | 7818227   | 7837064   | inside       | 7161    | 6839   | shortestDistance |
| chr9 | 8042305   | 8043337   | 1033 | -1.09 | 0.000752 | 0.00569  | ENSMUSG000000050379230110C199 | protein_codi  | 8021672   | 8042823   | overlapStart | 2       | 514    | shortestDistance |
| chr9 | 8074377   | 8074695   | 319  | -1.39 | 0.000405 | 0.0035   | ENSMUSG00000004072Cep126      | protein_codi  | 8076461   | 8134294   | downstream   | 59758   | 1766   | shortestDistance |
| chr9 | 8133900   | 8134685   | 786  | -1.1  | 0.000578 | 0.00463  | ENSMUSG00000004072Cep126      | protein_codi  | 8076461   | 8134294   | overlapStart | 2       | 391    | shortestDistance |
| chr9 | 8157097   | 8157499   | 403  | -1.71 | 0.000125 | 0.00134  | ENSMUSG00000011135Gm19324     | unprocessed   | 8142541   | 8185129   | inside       | 14757   | 14556  | shortestDistance |
| chr9 | 8179665   | 8179927   | 263  | 2.35  | 4.96E-06 | 9.13E-05 | ENSMUSG00000011135Gm19324     | unprocessed   | 8142541   | 8185129   | inside       | 37255   | 5202   | shortestDistance |
| chr9 | 8226482   | 8226926   | 445  | -1.36 | 0.00016  | 0.00164  | ENSMUSG00000003991700128708   | transcribed_1 | 8221889   | 8241987   | inside       | 4815    | 4593   | shortestDistance |
| chr9 | 8331964   | 8332530   | 567  | -1.84 | 5.45E-06 | 9.90E-05 | ENSMUSG00000004874Mir1899     | miRNA         | 8246786   | 8246881   | downstream   | 85461   | 85083  | shortestDistance |
| chr9 | 8486523   | 8486892   | 370  | -1.36 | 0.000231 | 0.00222  | ENSMUSG00000011082AC115793.1  | processed_p   | 8476273   | 8476487   | downstream   | 10435   | 10036  | shortestDistance |
| chr9 | 8487411   | 8488336   | 926  | -1.55 | 5.62E-05 | 0.000695 | ENSMUSG00000011082AC115793.1  | processed_p   | 8476273   | 8476487   | downstream   | 11601   | 10924  | shortestDistance |
| chr9 | 8533532   | 8534098   | 567  | -2.13 | 6.39E-07 | 1.61E-05 | ENSMUSG00000003199Tnp6        | protein_codi  | 8544142   | 8680741   | upstream     | -10327  | 10044  | shortestDistance |
| chr9 | 8543911   | 8545678   | 1768 | -1.32 | 8.00E-04 | 0.00598  | ENSMUSG00000003199Tnp6        | protein_codi  | 8544142   | 8680741   | overlapStart | 652     | 231    | shortestDistance |
| chr9 | 8559809   | 8560287   | 479  | -1.95 | 1.20E-05 | 0.000193 | ENSMUSG00000003199Tnp6        | protein_codi  | 8544142   | 8680741   | inside       | 15906   | 15667  | shortestDistance |
| chr9 | 8595931   | 8596178   | 248  | -2.05 | 1.87E-05 | 0.00028  | ENSMUSG00000003199Tnp6        | protein_codi  | 8544142   | 8680741   | inside       | 51912   | 51789  | shortestDistance |
| chr9 | 8604509   | 8604830   | 322  | -1.81 | 6.04E-06 | 0.000108 | ENSMUSG00000003199Tnp6        | protein_codi  | 8544142   | 8680741   | inside       | 60528   | 60367  | shortestDistance |
| chr9 | 8641612   | 8641988   | 377  | -2.18 | 1.18E-06 | 2.69E-05 | ENSMUSG00000003199Tnp6        | protein_codi  | 8544142   | 8680741   | inside       | 97658   | 38753  | shortestDistance |
| chr9 | 8672969   | 8673382   | 414  | -1.16 | 0.0101   | 0.0426   | ENSMUSG00000011166Gm32014     | lincRNA       | 8644073   | 8740988   | inside       | 67812   | 28896  | shortestDistance |
| chr9 | 8676655   | 8676944   | 290  | -1.97 | 7.88E-07 | 1.92E-05 | ENSMUSG00000011166Gm32014     | lincRNA       | 8644073   | 8740988   | inside       | 64188   | 32582  | shortestDistance |
| chr9 | 8693007   | 8693584   | 578  | -1.23 | 0.000196 | 0.00194  | ENSMUSG00000011166Gm32014     | lincRNA       | 8644073   | 8740988   | inside       | 47692   | 47404  | shortestDistance |
| chr9 | 8700720   | 8701278   | 559  | -0.98 | 0.00283  | 0.0161   | ENSMUSG00000011166Gm32014     | lincRNA       | 8644073   | 8740988   | inside       | 39989   | 39710  | shortestDistance |
| chr9 | 8731069   | 8731466   | 398  | -1.1  | 0.00928  | 0.0401   | ENSMUSG00000011166Gm32014     | lincRNA       | 8644073   | 8740988   | inside       | 9720    | 9522   | shortestDistance |
| chr9 | 8831738   | 8832643   | 906  | -1.16 | 4.24E-06 | 7.97E-05 | ENSMUSG00000003187Pgr         | protein_codi  | 8899833   | 8968611   | upstream     | -67643  | 67190  | shortestDistance |
| chr9 | 8895028   | 8895611   | 584  | -1.02 | 0.00131  | 0.00884  | ENSMUSG00000003187Pgr         | protein_codi  | 8899833   | 8968611   | upstream     | -4513   | 4222   | shortestDistance |
| chr9 | 8900127   | 8900209   | 2083 | -1.21 | 0.000498 | 0.00411  | ENSMUSG00000003187Pgr         | protein_codi  | 8899833   | 8968611   | inside       | 1335    | 294    | shortestDistance |
| chr9 | 8954641   | 8954939   | 299  | -2.05 | 4.61E-05 | 0.00059  | ENSMUSG00000003187Pgr         | protein_codi  | 8899833   | 8968611   | inside       | 54957   | 13672  | shortestDistance |
| chr9 | 8958758   | 8959108   | 351  | -2.13 | 2.63E-06 | 5.32E-05 | ENSMUSG00000003187Pgr         | protein_codi  | 8899833   | 8968611   | inside       | 59100   | 9503   | shortestDistance |
| chr9 | 8996180   | 8996977   | 798  | -1.02 | 0.00139  | 0.00923  | ENSMUSG00000005073Arhgap42    | protein_codi  | 8994329   | 9239101   | inside       | 242523  | 1851   | shortestDistance |
| chr9 | 9027400   | 9027935   | 536  | -1.65 | 6.27E-06 | 0.000111 | ENSMUSG00000005073Arhgap42    | protein_codi  | 8994329   | 9239101   | inside       | 211433  | 33071  | shortestDistance |
| chr9 | 9107582   | 9108258   | 677  | -1.3  | 8.08E-05 | 0.000934 | ENSMUSG00000005073Arhgap42    | protein_codi  | 8994329   | 9239101   | inside       | 131181  | 112553 | shortestDistance |
| chr9 | 9144187   | 9145027   | 841  | -2.16 | 4.65E-11 | 4.84E-09 | ENSMUSG00000005073Arhgap42    | protein_codi  | 8994329   | 9239101   | inside       | 94494   | 94074  | shortestDistance |
| chr9 | 9238350   | 9239430   | 1081 | -0.93 | 0.00526  | 0.0259   | ENSMUSG00000005073Arhgap42    | protein_codi  | 8994329   | 9239101   | overlapStart | 211     | 329    | shortestDistance |
| chr9 | 9375323   | 9375793   | 471  | -0.98 | 0.00661  | 0.0309   | ENSMUSG00000011106Gm46102     | lincRNA       | 9355737   | 9583307   | inside       | 207749  | 19586  | shortestDistance |
| chr9 | 9412387   | 9413133   | 747  | -1.27 | 0.000444 | 0.00376  | ENSMUSG00000011106Gm46102     | lincRNA       | 9355737   | 9583307   | inside       | 170547  | 56650  | shortestDistance |
| chr9 | 9682168   | 9682776   | 609  | -1.31 | 6.79E-05 | 0.000813 | ENSMUSG00000003948Cntn5       | protein_codi  | 9660891   | 10904775  | inside       | 1222303 | 21277  | shortestDistance |
| chr9 | 9700466   | 9704487   | 442  | -2.95 | 3.59E-09 | 1.92E-07 | ENSMUSG00000003948Cntn5       | protein_codi  | 9660891   | 10904775  | inside       | 1200509 | 43155  | shortestDistance |
| chr9 | 10324721  | 10325119  | 399  | -0.93 | 0.00645  | 0.0303   | ENSMUSG00000003948Cntn5       | protein_codi  | 9660891   | 10904775  | inside       | 579855  | 579656 | shortestDistance |
| chr9 | 10909617  | 10910113  | 497  | -1.33 | 0.000929 | 0.00673  | ENSMUSG00000010955Gm32710     | antisense_R1  | 10904345  | 10907818  | downstream   | 5520    | 1799   | shortestDistance |
| chr9 | 11230022  | 11230422  | 401  | -2.19 | 1.67E-06 | 3.61E-05 | ENSMUSG00000011094Gm29526.1   | processed_p   | 11238604  | 11238870  | downstream   | 8648    | 8182   | shortestDistance |
| chr9 | 12496789  | 12497262  | 47   |       |          |          |                               |               |           |           |              |         |        |                  |

|      |          |          |      |       |          |          |                      |            |              |          |          |              |         |        |                  |
|------|----------|----------|------|-------|----------|----------|----------------------|------------|--------------|----------|----------|--------------|---------|--------|------------------|
| chr9 | 15121028 | 15121310 | 283  | -1.46 | 0.000525 | 0.00429  | ENSMUSG00000003193   | Heph1      | protein_codi | 15051841 | 15112108 | upstream     | -9061   | 8920   | shortestDistance |
| chr9 | 15238947 | 15239691 | 745  | -1.41 | 7.43E-05 | 0.000872 | ENSMUSG00000003193   | Vstm5      | protein_codi | 15239045 | 15259416 | overlapStart | 274     | 98     | shortestDistance |
| chr9 | 15241541 | 15241861 | 321  | -1.17 | 0.000469 | 0.00393  | ENSMUSG00000003193   | Vstm5      | protein_codi | 15239045 | 15259416 | inside       | 2656    | 2496   | shortestDistance |
| chr9 | 15395240 | 15395923 | 684  | 1.7   | 6.75E-06 | 0.000119 | ENSMUSG00000011176   | Gm34973    | lincRNA      | 15381367 | 15387425 | downstream   | 14215   | 7815   | shortestDistance |
| chr9 | 15487685 | 15488265 | 581  | -1.58 | 0.000212 | 0.00207  | ENSMUSG00000005817   | Smco4      | protein_codi | 15493432 | 15545260 | upstream     | -5457   | 5167   | shortestDistance |
| chr9 | 15531189 | 15531647 | 459  | -1.48 | 0.000862 | 0.00634  | ENSMUSG00000005817   | Smco4      | protein_codi | 15493432 | 15545260 | inside       | 37986   | 13613  | shortestDistance |
| chr9 | 15538963 | 15539304 | 342  | -1.19 | 0.000901 | 0.00656  | ENSMUSG00000005817   | Smco4      | protein_codi | 15493432 | 15545260 | inside       | 45702   | 5956   | shortestDistance |
| chr9 | 15681852 | 15682237 | 386  | -1.57 | 1.97E-05 | 0.000291 | ENSMUSG00000011078   | Gm5119     | processed_p  | 15682902 | 15683535 | upstream     | -858    | 665    | shortestDistance |
| chr9 | 15685224 | 15685561 | 338  | -0.86 | 0.011    | 0.0458   | ENSMUSG00000011078   | Gm5119     | processed_p  | 15682902 | 15683535 | downstream   | 2490    | 1689   | shortestDistance |
| chr9 | 15880085 | 15880647 | 563  | -1.2  | 0.00319  | 0.0176   | ENSMUSG00000005090   | Mtnr1b     | protein_codi | 15824528 | 15874556 | upstream     | -5810   | 5529   | shortestDistance |
| chr9 | 16197756 | 16198244 | 489  | -1.8  | 0.000862 | 0.00634  | ENSMUSG00000007450   | Fat3       | protein_codi | 15910189 | 16501285 | inside       | 303285  | 287567 | shortestDistance |
| chr9 | 16214803 | 16216058 | 1256 | -0.83 | 0.0118   | 0.0482   | ENSMUSG00000007450   | Fat3       | protein_codi | 15910189 | 16501285 | inside       | 285855  | 285227 | shortestDistance |
| chr9 | 16216166 | 16216717 | 552  | -0.9  | 0.00566  | 0.0274   | ENSMUSG00000007450   | Fat3       | protein_codi | 15910189 | 16501285 | inside       | 284843  | 284568 | shortestDistance |
| chr9 | 16282955 | 16283416 | 462  | -2.84 | 1.73E-08 | 7.50E-07 | ENSMUSG00000007450   | Fat3       | protein_codi | 15910189 | 16501285 | inside       | 218099  | 217869 | shortestDistance |
| chr9 | 16297383 | 16297803 | 421  | -1.03 | 0.00075  | 0.034    | ENSMUSG00000007450   | Fat3       | protein_codi | 15910189 | 16501285 | inside       | 203692  | 203482 | shortestDistance |
| chr9 | 16297960 | 16298315 | 356  | -1.13 | 0.00245  | 0.0144   | ENSMUSG00000007450   | Fat3       | protein_codi | 15910189 | 16501285 | inside       | 203147  | 202970 | shortestDistance |
| chr9 | 16381086 | 16381346 | 261  | -1.68 | 4.84E-05 | 0.000614 | ENSMUSG00000007450   | Fat3       | protein_codi | 15910189 | 16501285 | inside       | 120069  | 119939 | shortestDistance |
| chr9 | 16500519 | 16502353 | 1835 | -1.19 | 0.000815 | 0.00607  | ENSMUSG00000007450   | Fat3       | protein_codi | 15910189 | 16501285 | overlapStart | -151    | 766    | shortestDistance |
| chr9 | 17288831 | 17289455 | 625  | -2.03 | 4.09E-05 | 0.000534 | ENSMUSG00000011140   | Gm2594     | processed_p  | 17501968 | 17502709 | downstream   | 213566  | 212513 | shortestDistance |
| chr9 | 18277547 | 18277850 | 304  | -1.04 | 0.00287  | 0.0162   | ENSMUSG00000011187   | Gm7692     | processed_p  | 18289452 | 18289860 | downstream   | 12162   | 11602  | shortestDistance |
| chr9 | 18468014 | 18468496 | 483  | 1.64  | 1.41E-05 | 0.000221 | ENSMUSG00000007450   | Zfp558     | protein_codi | 18455575 | 18478268 | inside       | 10013   | 9772   | shortestDistance |
| chr9 | 18473083 | 18474162 | 1080 | -0.76 | 0.00839  | 0.0371   | ENSMUSG00000007450   | Zfp558     | protein_codi | 18455575 | 18478268 | inside       | 4646    | 4106   | shortestDistance |
| chr9 | 20203574 | 20203991 | 418  | 1.3   | 0.00165  | 0.0106   | ENSMUSG00000008951   | Gm26290    | snRNA        | 20209207 | 20209351 | downstream   | 5569    | 5216   | shortestDistance |
| chr9 | 20966640 | 20967394 | 755  | 1.17  | 0.00168  | 0.0108   | ENSMUSG00000004389   | S1pr2      | protein_codi | 20962361 | 20976781 | inside       | 9764    | 4279   | shortestDistance |
| chr9 | 20973632 | 20974083 | 452  | 1.68  | 0.000793 | 0.00594  | ENSMUSG00000004389   | S1pr2      | protein_codi | 20962361 | 20976781 | inside       | 2923    | 2698   | shortestDistance |
| chr9 | 21125413 | 21126104 | 692  | 2.32  | 1.47E-05 | 0.000229 | ENSMUSG00000003217   | Tyk2       | protein_codi | 21104068 | 21131243 | inside       | 5485    | 5139   | shortestDistance |
| chr9 | 21167700 | 21167987 | 288  | 1.06  | 0.00454  | 0.0231   | ENSMUSG00000003217   | Pde4a      | protein_codi | 21165714 | 21213248 | inside       | 2130    | 1986   | shortestDistance |
| chr9 | 21331502 | 21332139 | 638  | 1.35  | 0.000418 | 0.00359  | ENSMUSG00000005719   | Slc44a2    | protein_codi | 21320698 | 21355028 | inside       | 11122   | 10804  | shortestDistance |
| chr9 | 21525938 | 21526459 | 522  | 1.11  | 0.0111   | 0.0458   | ENSMUSG00000005719   | AB124611   | protein_codi | 21526176 | 21545333 | overlapStart | 22      | 238    | shortestDistance |
| chr9 | 21527851 | 21528309 | 459  | 1.19  | 0.00116  | 0.00801  | ENSMUSG00000005719   | AB124611   | protein_codi | 21526176 | 21545333 | inside       | 1904    | 1675   | shortestDistance |
| chr9 | 21909349 | 21909845 | 497  | 1.09  | 0.0111   | 0.0461   | ENSMUSG00000001906   | Rab3d      | protein_codi | 21907491 | 21918192 | inside       | 8595    | 1858   | shortestDistance |
| chr9 | 21950336 | 21950647 | 312  | 1.44  | 0.00123  | 0.00839  | ENSMUSG00000004056   | Pllpr2     | protein_codi | 21937033 | 21948907 | downstream   | 13459   | 1429   | shortestDistance |
| chr9 | 21988397 | 21988644 | 248  | -1.32 | 0.00258  | 0.015    | ENSMUSG00000000414   | Rgl3       | protein_codi | 21968711 | 21989446 | inside       | 926     | 802    | shortestDistance |
| chr9 | 22118096 | 22118362 | 267  | 1.01  | 0.00791  | 0.0355   | ENSMUSG00000011185   | AC163623.2 | processed_tr | 22117328 | 22137756 | inside       | 901     | 768    | shortestDistance |
| chr9 | 22266607 | 22267114 | 508  | 1.18  | 0.00523  | 0.0258   | ENSMUSG00000003677   | Anln       | protein_codi | 22323012 | 22389188 | inside       | 22328   | 22074  | shortestDistance |
| chr9 | 22429890 | 22430265 | 376  | -1.15 | 0.00179  | 0.0113   | ENSMUSG00000003677   | CCO51      | protein_codi | 22411513 | 22444681 | inside       | 18565   | 14416  | shortestDistance |
| chr9 | 22443152 | 22443812 | 661  | 3.46  | 2.25E-11 | 2.63E-09 | ENSMUSG00000003233   | Rp9        | protein_codi | 22411047 | 22469743 | inside       | 26261   | 25931  | shortestDistance |
| chr9 | 22533100 | 22533434 | 335  | -1.22 | 0.000706 | 0.00542  | ENSMUSG00000003591   | Bbs9       | protein_codi | 22475715 | 22888280 | inside       | 57552   | 57385  | shortestDistance |
| chr9 | 22551326 | 22551728 | 403  | -1.75 | 1.37E-05 | 0.000215 | ENSMUSG00000003591   | Bbs9       | protein_codi | 22475715 | 22888280 | inside       | 75812   | 75611  | shortestDistance |
| chr9 | 22557418 | 22557721 | 304  | -1.54 | 0.000167 | 0.0017   | ENSMUSG00000003591   | Bbs9       | protein_codi | 22475715 | 22888280 | inside       | 81855   | 81703  | shortestDistance |
| chr9 | 22645868 | 22646328 | 461  | -1.29 | 0.000301 | 0.00275  | ENSMUSG00000003591   | Bbs9       | protein_codi | 22475715 | 22888280 | inside       | 170383  | 170153 | shortestDistance |
| chr9 | 22672916 | 22673497 | 582  | -1.36 | 5.26E-05 | 0.000658 | ENSMUSG00000003591   | Bbs9       | protein_codi | 22475715 | 22888280 | inside       | 197491  | 197201 | shortestDistance |
| chr9 | 22686617 | 22687421 | 805  | 1.54  | 1.33E-05 | 0.000209 | ENSMUSG00000003591   | Bbs9       | protein_codi | 22475715 | 22888280 | inside       | 211304  | 200859 | shortestDistance |
| chr9 | 22708964 | 22709331 | 368  | -1.43 | 9.32E-05 | 0.00105  | ENSMUSG00000003591   | Bbs9       | protein_codi | 22475715 | 22888280 | inside       | 233433  | 178949 | shortestDistance |
| chr9 | 22756812 | 22757310 | 499  | -1.85 | 1.91E-05 | 0.000284 | ENSMUSG00000003591   | Bbs9       | protein_codi | 22475715 | 22888280 | inside       | 281346  | 130970 | shortestDistance |
| chr9 | 22791205 | 22792172 | 968  | -0.92 | 0.00416  | 0.0216   | ENSMUSG00000003591   | Bbs9       | protein_codi | 22475715 | 22888280 | inside       | 315973  | 96108  | shortestDistance |
| chr9 | 22793599 | 22794065 | 467  | -1.29 | 0.000463 | 0.00389  | ENSMUSG00000003591   | Bbs9       | protein_codi | 22475715 | 22888280 | inside       | 38117   | 94215  | shortestDistance |
| chr9 | 22945372 | 22946094 | 723  | 2.97  | 1.10E-07 | 3.61E-06 | ENSMUSG00000003591   | Bbs9       | protein_codi | 22475715 | 22888280 | downstream   | 470018  | 57092  | shortestDistance |
| chr9 | 23027648 | 23027983 | 336  | -1.01 | 0.00563  | 0.0273   | ENSMUSG00000003591   | Bbs9       | protein_codi | 22475715 | 22888280 | downstream   | 552101  | 139368 | shortestDistance |
| chr9 | 23036164 | 23036711 | 548  | -1.46 | 7.02E-05 | 0.000835 | ENSMUSG00000003591   | Bbs9       | protein_codi | 22475715 | 22888280 | downstream   | 560723  | 147884 | shortestDistance |
| chr9 | 23062940 | 23063523 | 584  | -1    | 0.00152  | 0.00992  | ENSMUSG00000003196   | Bmper      | protein_codi | 23223076 | 23485200 | upstream     | -159844 | 159553 | shortestDistance |
| chr9 | 23072782 | 23073462 | 681  | -1.46 | 2.15E-05 | 0.000314 | ENSMUSG00000003196   | Bmper      | protein_codi | 23223076 | 23485200 | upstream     | -149954 | 149614 | shortestDistance |
| chr9 | 23083255 | 23084017 | 493  | -1.59 | 3.39E-05 | 0.000458 | ENSMUSG00000003196   | Bmper      | protein_codi | 23223076 | 23485200 | upstream     | -139305 | 139059 | shortestDistance |
| chr9 | 23111348 | 23111865 | 518  | -1.17 | 0.000275 | 0.00256  | ENSMUSG00000003196   | Bmper      | protein_codi | 23223076 | 23485200 | upstream     | -111470 | 111211 | shortestDistance |
| chr9 | 23126219 | 23126529 | 311  | -1.29 | 0.00609  | 0.029    | ENSMUSG00000003196   | Bmper      | protein_codi | 23223076 | 23485200 | upstream     | -96702  | 96547  | shortestDistance |
| chr9 | 23168170 | 23168518 | 349  | -2.26 | 1.05E-07 | 3.46E-06 | ENSMUSG00000003196   | Bmper      | protein_codi | 23223076 | 23485200 | upstream     | -54732  | 54558  | shortestDistance |
| chr9 | 23212311 | 23212719 | 409  | -1.08 | 0.00189  | 0.0118   | ENSMUSG00000003196   | Bmper      | protein_codi | 23223076 | 23485200 | upstream     | -10561  | 10357  | shortestDistance |
| chr9 | 23219913 | 23220146 | 234  | -1.19 | 0.00128  | 0.0087   | ENSMUSG00000003196   | Bmper      | protein_codi | 23223076 | 23485200 | upstream     | -3046   | 2930   | shortestDistance |
| chr9 | 23222419 | 23223741 | 1323 | -1.07 | 0.00174  | 0.011    | ENSMUSG00000003196   | Bmper      | protein_codi | 23223076 | 23485200 | overlapStart | 4       | 657    | shortestDistance |
| chr9 | 23235380 | 23235982 | 603  | -1.24 | 5.00E-04 | 0.00413  | ENSMUSG00000003196   | Bmper      | protein_codi | 23223076 | 23485200 | inside       | 12605   | 12304  | shortestDistance |
| chr9 | 23250075 | 23250474 | 400  | -0.95 | 0.00828  | 0.0368   | ENSMUSG00000003196   | Bmper      | protein_codi | 23223076 | 23485200 | inside       | 27198   | 26999  | shortestDistance |
| chr9 | 23275638 | 23276693 | 1056 | -1.97 | 7.72E-09 | 3.73E-07 | ENSMUSG00000003196   | Bmper      | protein_codi | 23223076 | 23485200 | inside       | 53090   | 52562  | shortestDistance |
| chr9 | 23354206 | 23354891 | 686  | -0.9  | 0.00513  | 0.0254   | ENSMUSG00000003196   | Bmper      | protein_codi | 23223076 | 23485200 | inside       | 131472  | 130309 | shortestDistance |
| chr9 | 23378709 | 23379323 | 615  | -1.63 | 2.80E-07 | 8.02E-06 | ENSMUSG00000003196   | Bmper      | protein_codi | 23223076 | 23485200 | inside       | 155940  | 105877 | shortestDistance |
| chr9 | 23433234 | 23433680 | 447  | -1.67 | 1.93E-05 | 0.000287 | ENSMUSG00000003196   | Bmper      | protein_codi | 23223076 | 23485200 | inside       | 210381  | 51520  | shortestDistance |
| chr9 | 23460828 | 23461086 | 261  | -2.3  | 2.30E-07 | 6.78E-06 | ENSMUSG00000003196   | Bmper      | protein_codi | 23223076 | 23485200 | inside       | 237880  | 24114  | shortestDistance |
| chr9 | 23533846 | 23534212 | 367  | -0.92 | 0.00721  | 0.033    | ENSMUSG00000003196   | Bmper      | protein_codi | 23223076 | 23485200 | downstream   | 310953  | 48646  | shortestDistance |
| chr9 | 23566723 | 23566937 | 215  | -0.99 | 0.0053   | 0.0261   | ENSMUSG00000003196   | Bmper      | protein_codi | 23223076 | 23485200 | downstream   | 343754  | 81523  | shortestDistance |
| chr9 | 23570112 | 23570698 | 587  | -0.94 | 0.00164  | 0.0105   | ENSMUSG00000003196   | Bmper      | protein_codi | 23223076 | 23485200 | downstream   | 347329  | 84912  | shortestDistance |
| chr9 | 23581054 | 23581558 | 505  | -1.21 | 0.000322 | 0.0029   | ENSMUSG00000003196   | Bmper      | protein_codi | 23223076 | 23485200 | downstream   | 358230  | 95854  | shortestDistance |
| chr9 | 24136172 | 24136924 | 753  | -1.76 | 3.83E-06 | 7.32E-05 | ENSMUSG00000004365</ |            |              |          |          |              |         |        |                  |

|      |          |          |      |       |          |          |                    |            |              |          |            |              |        |        |                  |
|------|----------|----------|------|-------|----------|----------|--------------------|------------|--------------|----------|------------|--------------|--------|--------|------------------|
| chr9 | 27728671 | 27729229 | 559  | -2.27 | 7.14E-07 | 1.77E-05 | ENSMUSG0000006225  | Opcml      | protein_codi | 27790775 | 28925410   | upstream     | -61825 | 61546  | shortestDistance |
| chr9 | 27739366 | 27739630 | 265  | -1.66 | 8.20E-05 | 0.000945 | ENSMUSG0000006225  | Opcml      | protein_codi | 27790775 | 28925410   | upstream     | -51277 | 51145  | shortestDistance |
| chr9 | 27922152 | 27922457 | 306  | -1.66 | 0.00061  | 0.0379   | ENSMUSG0000006225  | Opcml      | protein_codi | 27790775 | 28925410   | inside       | 131529 | 131377 | shortestDistance |
| chr9 | 27991460 | 27991975 | 516  | -1.53 | 0.000632 | 0.00497  | ENSMUSG0000006225  | Opcml      | protein_codi | 27790775 | 28925410   | inside       | 200943 | 200685 | shortestDistance |
| chr9 | 28084196 | 28084781 | 586  | -2.02 | 3.88E-05 | 0.000512 | ENSMUSG0000006225  | Opcml      | protein_codi | 27790775 | 28925410   | inside       | 293713 | 293421 | shortestDistance |
| chr9 | 28096156 | 28096587 | 432  | 1.58  | 0.000504 | 0.00415  | ENSMUSG0000006225  | Opcml      | protein_codi | 27790775 | 28925410   | inside       | 305597 | 305381 | shortestDistance |
| chr9 | 28101695 | 28102536 | 842  | -1.58 | 0.00035  | 0.00311  | ENSMUSG0000006225  | Opcml      | protein_codi | 27790775 | 28925410   | inside       | 311341 | 310920 | shortestDistance |
| chr9 | 28197686 | 28197966 | 281  | -1.85 | 6.28E-06 | 0.000111 | ENSMUSG0000008753  | Gm15606    | sense_intron | 28197887 | 28199521   | overlapStart | -61    | 79     | shortestDistance |
| chr9 | 28289471 | 28290156 | 686  | -3.29 | 5.27E-07 | 1.36E-05 | ENSMUSG0000006225  | Opcml      | protein_codi | 27790775 | 28925410   | inside       | 499039 | 498696 | shortestDistance |
| chr9 | 28403052 | 28403690 | 639  | -1.27 | 0.000985 | 0.00705  | ENSMUSG0000006225  | Opcml      | protein_codi | 27790775 | 28925410   | inside       | 612596 | 521720 | shortestDistance |
| chr9 | 28463405 | 28464317 | 913  | -1.57 | 1.78E-05 | 0.000267 | ENSMUSG0000006225  | Opcml      | protein_codi | 27790775 | 28925410   | inside       | 673086 | 461093 | shortestDistance |
| chr9 | 28464397 | 28464639 | 243  | -1.15 | 0.00373  | 0.0199   | ENSMUSG0000006225  | Opcml      | protein_codi | 27790775 | 28925410   | inside       | 673743 | 460771 | shortestDistance |
| chr9 | 28536444 | 28537031 | 588  | -2.12 | 8.08E-06 | 0.000138 | ENSMUSG0000006225  | Opcml      | protein_codi | 27790775 | 28925410   | inside       | 745963 | 388379 | shortestDistance |
| chr9 | 28568875 | 28569752 | 878  | -0.98 | 0.00197  | 0.0122   | ENSMUSG0000006225  | Opcml      | protein_codi | 27790775 | 28925410   | inside       | 778539 | 355658 | shortestDistance |
| chr9 | 29409269 | 29409731 | 463  | -1.13 | 0.00401  | 0.021    | ENSMUSG0000005997  | Ntm        | protein_codi | 28994750 | 29963141   | inside       | 553641 | 414519 | shortestDistance |
| chr9 | 29586007 | 29586272 | 266  | -1.36 | 0.00192  | 0.0119   | ENSMUSG0000005997  | Ntm        | protein_codi | 28994750 | 29963141   | inside       | 377001 | 376869 | shortestDistance |
| chr9 | 29642938 | 29643621 | 684  | -1.57 | 9.90E-07 | 2.33E-05 | ENSMUSG0000005997  | Ntm        | protein_codi | 28994750 | 29963141   | inside       | 319861 | 319520 | shortestDistance |
| chr9 | 29654912 | 29655233 | 322  | -1.12 | 0.00229  | 0.0137   | ENSMUSG0000005997  | Ntm        | protein_codi | 28994750 | 29963141   | inside       | 308069 | 307908 | shortestDistance |
| chr9 | 29675992 | 29676233 | 242  | -1.44 | 0.00233  | 0.0139   | ENSMUSG0000005997  | Ntm        | protein_codi | 28994750 | 29963141   | inside       | 287029 | 286908 | shortestDistance |
| chr9 | 29750620 | 29751093 | 474  | -0.85 | 0.00573  | 0.0277   | ENSMUSG0000005997  | Ntm        | protein_codi | 28994750 | 29963141   | inside       | 212285 | 212048 | shortestDistance |
| chr9 | 29751144 | 29751788 | 645  | -1.31 | 2.63E-05 | 0.000371 | ENSMUSG0000005997  | Ntm        | protein_codi | 28994750 | 29963141   | inside       | 211675 | 211353 | shortestDistance |
| chr9 | 29782725 | 29783065 | 341  | -1.22 | 0.00141  | 0.00932  | ENSMUSG0000005997  | Ntm        | protein_codi | 28994750 | 29963141   | inside       | 180246 | 180076 | shortestDistance |
| chr9 | 29798962 | 29799046 | 505  | -0.84 | 0.00647  | 0.0304   | ENSMUSG0000005997  | Ntm        | protein_codi | 28994750 | 29963141   | inside       | 172927 | 172675 | shortestDistance |
| chr9 | 29791310 | 29791656 | 347  | -0.85 | 0.00951  | 0.0409   | ENSMUSG0000005997  | Ntm        | protein_codi | 28994750 | 29963141   | inside       | 171658 | 171485 | shortestDistance |
| chr9 | 29962039 | 29962873 | 835  | -1.76 | 0.000204 | 0.00201  | ENSMUSG0000005997  | Ntm        | protein_codi | 28994750 | 29963141   | inside       | 685    | 268    | shortestDistance |
| chr9 | 29963023 | 29963321 | 299  | -1.25 | 0.00636  | 0.03     | ENSMUSG0000005997  | Ntm        | protein_codi | 28994750 | 29963141   | overlapStart | -31    | 118    | shortestDistance |
| chr9 | 30137639 | 30138313 | 675  | -2.25 | 2.56E-09 | 1.44E-07 | ENSMUSG0000011130  | AC131912.1 | lincRNA      | 30167575 | 30171881   | upstream     | -29599 | 29262  | shortestDistance |
| chr9 | 30264644 | 30265154 | 511  | -1.24 | 7.00E-04 | 0.00539  | ENSMUSG0000009601  | Gm26435    | snRNA        | 30291868 | 30291974   | downstream   | 27075  | 26714  | shortestDistance |
| chr9 | 30299911 | 30300178 | 268  | -2.21 | 3.51E-06 | 6.80E-05 | ENSMUSG0000009601  | Gm26435    | snRNA        | 30291868 | 30291974   | upstream     | -8070  | 7937   | shortestDistance |
| chr9 | 30313393 | 30313788 | 396  | -3.96 | 1.49E-09 | 9.00E-08 | ENSMUSG0000009601  | Gm26435    | snRNA        | 30291868 | 30291974   | upstream     | -21616 | 21419  | shortestDistance |
| chr9 | 30426805 | 30427501 | 697  | -0.91 | 0.0022   | 0.0133   | ENSMUSG0000003195  | Snx19      | protein_codi | 30427108 | 30466733   | overlapStart | 45     | 303    | shortestDistance |
| chr9 | 30480451 | 30480899 | 449  | -0.84 | 0.00688  | 0.0319   | ENSMUSG0000011126  | CU024910.1 | processed_p  | 30489959 | 30490376   | upstream     | -9284  | 9060   | shortestDistance |
| chr9 | 30922304 | 30922863 | 560  | -1.08 | 0.00225  | 0.0135   | ENSMUSG0000003345  | Adamts15   | protein_codi | 30899155 | 30922452   | overlapStart | -132   | 148    | shortestDistance |
| chr9 | 30940360 | 30940669 | 310  | -0.94 | 0.00536  | 0.0263   | ENSMUSG0000003199  | Adamts8    | protein_codi | 30942562 | 30963838   | upstream     | -2048  | 1893   | shortestDistance |
| chr9 | 30942492 | 30943378 | 887  | -0.89 | 0.00451  | 0.023    | ENSMUSG0000003199  | Adamts8    | protein_codi | 30942562 | 30963838   | overlapStart | 373    | 70     | shortestDistance |
| chr9 | 31050279 | 31050609 | 331  | 1.78  | 0.000186 | 0.00186  | ENSMUSG0000000474  | Bt14b4     | protein_codi | 31030644 | 31075885   | inside       | 19800  | 19635  | shortestDistance |
| chr9 | 31129747 | 31131162 | 1416 | -0.74 | 0.0121   | 0.049    | ENSMUSG0000003195  | St1        | protein_codi | 31089402 | 31131853   | inside       | 1399   | 691    | shortestDistance |
| chr9 | 31176376 | 31176825 | 450  | -1.32 | 8.29E-05 | 0.000953 | ENSMUSG0000003199  | Ap1p2      | protein_codi | 31149557 | 31211815   | inside       | 35215  | 26819  | shortestDistance |
| chr9 | 31198571 | 31198985 | 415  | -2.01 | 2.15E-07 | 6.40E-06 | ENSMUSG0000003199  | Ap1p2      | protein_codi | 31149557 | 31211815   | inside       | 13037  | 12830  | shortestDistance |
| chr9 | 31217629 | 31218031 | 403  | -2.18 | 6.90E-07 | 1.71E-05 | ENSMUSG0000003199  | Ap1p2      | protein_codi | 31149557 | 31211815   | upstream     | -6015  | 5814   | shortestDistance |
| chr9 | 31252406 | 31252688 | 283  | 1.74  | 7.80E-05 | 0.000907 | ENSMUSG0000000100  | Gm7244     | processed_p  | 31274821 | 31275275   | upstream     | -22274 | 22133  | shortestDistance |
| chr9 | 31266009 | 31266639 | 631  | -1.38 | 0.000418 | 0.00358  | ENSMUSG0000009100  | Gm7244     | processed_p  | 31274821 | 31275275   | upstream     | -8497  | 8182   | shortestDistance |
| chr9 | 31290024 | 31290650 | 627  | 1.18  | 0.00182  | 0.0115   | ENSMUSG0000004249  | Pdm10      | protein_codi | 31280538 | 31381723   | inside       | 9799   | 9486   | shortestDistance |
| chr9 | 31304739 | 31304746 | 368  | -1.04 | 0.00256  | 0.0149   | ENSMUSG0000004249  | Pdm10      | protein_codi | 31280538 | 31381723   | inside       | 24024  | 23841  | shortestDistance |
| chr9 | 31418830 | 31419253 | 424  | -1.01 | 0.00949  | 0.0408   | ENSMUSG0000004218  | Nfrkb      | protein_codi | 31386192 | 31421333   | inside       | 32850  | 2080   | shortestDistance |
| chr9 | 31543036 | 31543752 | 717  | -0.8  | 0.00964  | 0.0413   | ENSMUSG0000011185  | Gm31408    | lincRNA      | 31559609 | 31579634   | upstream     | -16215 | 15857  | shortestDistance |
| chr9 | 31688201 | 31688813 | 613  | -2.18 | 4.05E-07 | 1.10E-05 | ENSMUSG0000011085  | AC161245.1 | lincRNA      | 31676808 | 31678026   | upstream     | -10481 | 10175  | shortestDistance |
| chr9 | 31802673 | 31803800 | 408  | -1.27 | 0.0018   | 0.0114   | ENSMUSG0000011077  | Gm8171     | processed_p  | 31782984 | 31783703   | downstream   | 19892  | 18970  | shortestDistance |
| chr9 | 31841161 | 31841689 | 529  | -1.31 | 7.30E-05 | 0.000861 | ENSMUSG0000003203  | Barx2      | protein_codi | 31846044 | 31913462   | downstream   | 72037  | 4355   | shortestDistance |
| chr9 | 31858622 | 31859045 | 424  | -1.17 | 0.000744 | 0.00564  | ENSMUSG0000003203  | Barx2      | protein_codi | 31846044 | 31913462   | inside       | 54628  | 12578  | shortestDistance |
| chr9 | 31912896 | 31913592 | 697  | -0.99 | 0.00342  | 0.0186   | ENSMUSG0000003203  | Barx2      | protein_codi | 31846044 | 31913462   | overlapStart | 218    | 130    | shortestDistance |
| chr9 | 31931694 | 31932068 | 375  | 1.09  | 0.00228  | 0.0136   | ENSMUSG0000009163  | Gm3756     | processed_p  | 31935446 | 31936800   | downstream   | 4919   | 3378   | shortestDistance |
| chr9 | 31948999 | 31949415 | 417  | 1.61  | 2.77E-05 | 0.000387 | ENSMUSG0000011116  | Tpi-rs4    | processed_p  | 31948346 | 31949065   | overlapEnd   | 861    | 66     | shortestDistance |
| chr9 | 31995468 | 31996009 | 542  | -0.8  | 0.0108   | 0.0449   | ENSMUSG0000011177  | AC160635.2 | lincRNA      | 31947018 | 32005460   | inside       | 9722   | 9451   | shortestDistance |
| chr9 | 32005592 | 32005951 | 360  | -1.13 | 0.00733  | 0.0335   | ENSMUSG0000011084  | AC134607.1 | processed_p  | 32078281 | 32078765   | downstream   | 17491  | 16827  | shortestDistance |
| chr9 | 32208114 | 32208432 | 319  | -1.31 | 0.00357  | 0.0192   | ENSMUSG0000004144  | Arhgap32   | protein_codi | 32116136 | 32268446   | inside       | 92137  | 60014  | shortestDistance |
| chr9 | 32291393 | 32292028 | 636  | -1.3  | 0.00078  | 0.00586  | ENSMUSG0000003203  | Kcnj5      | protein_codi | 32314707 | 32344350   | downstream   | 52640  | 2679   | shortestDistance |
| chr9 | 32344096 | 32344852 | 757  | -0.97 | 0.00749  | 0.034    | ENSMUSG0000003203  | Kcnj5      | protein_codi | 32314707 | 32344350   | overlapStart | -124   | 254    | shortestDistance |
| chr9 | 32352590 | 32352948 | 359  | -1.61 | 0.000145 | 0.00152  | ENSMUSG0000011105  | Gm39317    | lincRNA      | 32348682 | 32361738   | inside       | 4087   | 3908   | shortestDistance |
| chr9 | 32368834 | 32369185 | 352  | -1.18 | 0.0014   | 0.00928  | ENSMUSG00000004124 | Kcnj1      | protein_codi | 32372493 | 32399197   | upstream     | -3483  | 3308   | shortestDistance |
| chr9 | 32405160 | 32405667 | 508  | -0.93 | 0.00449  | 0.0229   | ENSMUSG00000004124 | Kcnj1      | protein_codi | 32372493 | 32399197   | downstream   | 32921  | 5963   | shortestDistance |
| chr9 | 32409038 | 32409697 | 660  | -1.18 | 0.00705  | 0.0325   | ENSMUSG00000004124 | Kcnj1      | protein_codi | 32372493 | 32399197   | downstream   | 36875  | 9841   | shortestDistance |
| chr9 | 32520250 | 32520654 | 405  | 3.29  | 2.12E-10 | 1.74E-08 | ENSMUSG0000001608  | Fil1       | protein_codi | 32422204 | 32542861   | inside       | 22409  | 22207  | shortestDistance |
| chr9 | 32607265 | 32607633 | 369  | 1.46  | 0.00942  | 0.0406   | ENSMUSG0000011084  | AC127581.1 | lincRNA      | 32613452 | 32629557   | upstream     | -6003  | 5819   | shortestDistance |
| chr9 | 32612948 | 32613488 | 541  | -1.51 | 0.00113  | 0.00785  | ENSMUSG0000011084  | AC127581.1 | lincRNA      | 32613452 | 32629557   | overlapStart | -234   | 36     | shortestDistance |
| chr9 | 32654306 | 32654835 | 530  | 2.42  | 1.75E-07 | 5.36E-06 | ENSMUSG0000003203  | Ets1       | protein_codi | 32636221 | 32757820   | inside       | 18349  | 18085  | shortestDistance |
| chr9 | 32672139 | 32673064 | 926  | -1.02 | 0.00341  | 0.0185   | ENSMUSG0000003203  | Ets1       | protein_codi | 32636221 | 32757820   | inside       | 36381  | 35918  | shortestDistance |
| chr9 | 32712403 | 32712816 | 414  | 1.84  | 1.02E-05 | 0.000169 | ENSMUSG0000003203  | Ets1       | protein_codi | 32636221 | 32757820   | inside       | 76389  | 45004  | shortestDistance |
| chr9 | 32789324 | 32789725 | 402  | -1.72 | 0.000876 | 0.00641  | ENSMUSG0000009914  | Gm3331     | lincRNA      | 32813734 | 32834104   | upstream     | -24210 | 24009  | shortestDistance |
| chr9 | 32906104 | 32906919 | 816  | -1.01 | 0.00202  | 0.0124   | ENSMUSG0000009902  | Gm27162    | lincRNA      | 32904937 | 32928966   | inside       | 22454  | 1167   | shortestDistance |
| chr9 | 32925739 | 32926151 | 413  | 3.28  | 9.66E-11 | 8.99E-09 | ENSMUSG0000009902  | Gm27162    | lincRNA      | 32904937 | 32928966</ |              |        |        |                  |

|      |          |          |      |       |          |          |                                |              |          |          |              |        |        |                  |
|------|----------|----------|------|-------|----------|----------|--------------------------------|--------------|----------|----------|--------------|--------|--------|------------------|
| chr9 | 37207896 | 37208628 | 733  | -0.79 | 0.00789  | 0.0354   | ENSMUSG00000003212Tmem218      | protein_codi | 37208223 | 37224700 | overlapStart | 39     | 327    | shortestDistance |
| chr9 | 37239876 | 37240140 | 265  | -1.72 | 8.09E-05 | 0.000934 | ENSMUSG00000003212Sc37a2       | protein_codi | 37227585 | 37255738 | inside       | 15730  | 12291  | shortestDistance |
| chr9 | 37255078 | 37256208 | 1131 | -1.05 | 0.000374 | 0.00329  | ENSMUSG00000011179AC138284.5   | antisense_RI | 37255498 | 37256149 | includeFeatu | 145    | 59     | shortestDistance |
| chr9 | 37384217 | 37385261 | 1045 | -0.82 | 0.00768  | 0.0347   | ENSMUSG00000004624Hepacam      | protein_codi | 37367351 | 37386575 | inside       | 17388  | 1314   | shortestDistance |
| chr9 | 37401605 | 37402684 | 1080 | -1.45 | 0.00014  | 0.00147  | ENSMUSG00000003212Robo4        | protein_codi | 37401897 | 37415115 | overlapStart | 247    | 292    | shortestDistance |
| chr9 | 37416763 | 37417050 | 288  | -1.34 | 0.00191  | 0.0118   | ENSMUSG00000003212Robo3        | protein_codi | 37415669 | 37433246 | inside       | 16340  | 1094   | shortestDistance |
| chr9 | 37433803 | 37434480 | 678  | -0.86 | 0.00549  | 0.0268   | ENSMUSG00000003212Robo3        | protein_codi | 37415669 | 37433246 | upstream     | -896   | 557    | shortestDistance |
| chr9 | 37456211 | 37456913 | 493  | -1.3  | 8.88E-05 | 0.00101  | ENSMUSG00000011170AC105958.2   | unprocessed  | 37478453 | 37478643 | downstream   | 21976  | 21540  | shortestDistance |
| chr9 | 37527909 | 37528273 | 365  | -0.89 | 0.00686  | 0.0318   | ENSMUSG00000000194Esam         | protein_codi | 37528078 | 37538319 | overlapStart | 13     | 169    | shortestDistance |
| chr9 | 37554197 | 37554597 | 401  | -0.96 | 0.00303  | 0.0169   | ENSMUSG00000000194Siae         | protein_codi | 37555698 | 37649655 | upstream     | -1301  | 1101   | shortestDistance |
| chr9 | 37567495 | 37568801 | 1307 | -0.93 | 0.00227  | 0.0136   | ENSMUSG00000000194Siae         | protein_codi | 37555698 | 37649655 | inside       | 12450  | 11797  | shortestDistance |
| chr9 | 37576338 | 37577022 | 685  | -1.38 | 4.29E-06 | 8.05E-05 | ENSMUSG00000000194Siae         | protein_codi | 37555698 | 37649655 | inside       | 20982  | 20640  | shortestDistance |
| chr9 | 37598678 | 37599171 | 494  | -1.33 | 0.000425 | 0.00363  | ENSMUSG00000000194Siae         | protein_codi | 37555698 | 37649655 | inside       | 43226  | 42980  | shortestDistance |
| chr9 | 37669083 | 37669455 | 373  | -1.49 | 0.000476 | 0.00397  | ENSMUSG000000001111Panx3       | protein_codi | 37659902 | 37669235 | overlapStart | -34    | 152    | shortestDistance |
| chr9 | 37762472 | 37762907 | 436  | -1.56 | 0.000216 | 0.0021   | ENSMUSG00000005862Olftr875     | protein_codi | 37771857 | 37774459 | upstream     | -9167  | 8950   | shortestDistance |
| chr9 | 37782765 | 37783382 | 618  | -1.94 | 2.14E-07 | 6.37E-06 | ENSMUSG00000005862Olftr875     | protein_codi | 37771857 | 37774459 | downstream   | 11217  | 8306   | shortestDistance |
| chr9 | 37783522 | 37783993 | 472  | -1.42 | 0.000274 | 0.00255  | ENSMUSG00000005862Olftr875     | protein_codi | 37771857 | 37774459 | downstream   | 11901  | 9063   | shortestDistance |
| chr9 | 37807213 | 37807735 | 523  | -0.86 | 0.0115   | 0.0473   | ENSMUSG00000006675Olftr876     | protein_codi | 37803031 | 37808144 | inside       | 4443   | 409    | shortestDistance |
| chr9 | 37808593 | 37808843 | 251  | -2.34 | 5.43E-07 | 1.40E-05 | ENSMUSG00000006675Olftr876     | protein_codi | 37803031 | 37808144 | downstream   | 5687   | 449    | shortestDistance |
| chr9 | 37932363 | 37932914 | 552  | -0.89 | 0.0109   | 0.0454   | ENSMUSG00000011067Olftr879-ps1 | unprocessed  | 37941415 | 37942108 | upstream     | -8777  | 8501   | shortestDistance |
| chr9 | 38718113 | 38718786 | 674  | -0.85 | 0.00856  | 0.0377   | ENSMUSG000000002318Vwv5a       | protein_codi | 38718268 | 38743337 | overlapStart | 182    | 155    | shortestDistance |
| chr9 | 38792719 | 38793200 | 482  | -1.57 | 0.000307 | 0.00279  | ENSMUSG00000011118Gm19709      | processed_p  | 38786290 | 38786771 | upstream     | -6189  | 5948   | shortestDistance |
| chr9 | 38815493 | 38815967 | 475  | -1.41 | 0.00308  | 0.0172   | ENSMUSG00000004391Olftr922     | protein_codi | 38814614 | 38819195 | inside       | 1116   | 879    | shortestDistance |
| chr9 | 39115889 | 39116122 | 234  | -2.06 | 1.07E-05 | 0.000174 | ENSMUSG00000011101Olftr941-ps1 | unprocessed  | 39104049 | 39104983 | upstream     | -11023 | 10906  | shortestDistance |
| chr9 | 39612042 | 39612282 | 241  | -1.59 | 0.000169 | 0.00172  | ENSMUSG00000004829Olftr148     | protein_codi | 39610655 | 39615927 | inside       | 1507   | 1387   | shortestDistance |
| chr9 | 39678666 | 39679851 | 1186 | -1.2  | 9.87E-05 | 0.0011   | ENSMUSG00000011166Olftr964-ps1 | polymorphic  | 39686029 | 39686942 | downstream   | 7684   | 6178   | shortestDistance |
| chr9 | 39904824 | 39905494 | 671  | -1.02 | 0.000981 | 0.00703  | ENSMUSG00000009539Olftr29      | protein_codi | 39907336 | 39912732 | upstream     | -2177  | 1842   | shortestDistance |
| chr9 | 40192102 | 40193107 | 1006 | -0.82 | 0.00958  | 0.0411   | ENSMUSG00000002560Zfp202       | protein_codi | 40192316 | 40213604 | overlapStart | 288    | 214    | shortestDistance |
| chr9 | 40241107 | 40242220 | 1114 | -0.78 | 0.0122   | 0.0493   | ENSMUSG00000004928Scn3b        | protein_codi | 40269217 | 40291618 | upstream     | -27553 | 26997  | shortestDistance |
| chr9 | 40330636 | 40330974 | 339  | -0.92 | 0.00573  | 0.0277   | ENSMUSG000000087041700110K17   | antisense_RI | 40323426 | 40343564 | inside       | 7379   | 7210   | shortestDistance |
| chr9 | 40382106 | 40382484 | 379  | -1.22 | 0.00214  | 0.013    | ENSMUSG00000004011Gramd1b      | protein_codi | 40293233 | 40531383 | inside       | 149088 | 88873  | shortestDistance |
| chr9 | 40390877 | 40391254 | 378  | -1.37 | 0.000279 | 0.00258  | ENSMUSG00000004011Gramd1b      | protein_codi | 40293233 | 40531383 | inside       | 140317 | 97644  | shortestDistance |
| chr9 | 40391348 | 40392138 | 791  | -0.94 | 0.00739  | 0.0337   | ENSMUSG00000004011Gramd1b      | protein_codi | 40293233 | 40531383 | inside       | 139640 | 98115  | shortestDistance |
| chr9 | 40396939 | 40397497 | 559  | -1.27 | 5.03E-05 | 0.000635 | ENSMUSG00000004011Gramd1b      | protein_codi | 40293233 | 40531383 | inside       | 134165 | 103706 | shortestDistance |
| chr9 | 40457425 | 40457793 | 369  | 1.43  | 0.000522 | 0.00427  | ENSMUSG00000004011Gramd1b      | protein_codi | 40293233 | 40531383 | inside       | 73774  | 73590  | shortestDistance |
| chr9 | 40519290 | 40519736 | 447  | -1.18 | 0.000577 | 0.00462  | ENSMUSG00000004011Gramd1b      | protein_codi | 40293233 | 40531383 | inside       | 11870  | 11647  | shortestDistance |
| chr9 | 40575004 | 40575654 | 651  | 1.05  | 0.00174  | 0.011    | ENSMUSG00000011092Gm35177      | lincRNA      | 40547360 | 40561393 | downstream   | 27969  | 13611  | shortestDistance |
| chr9 | 40622817 | 40623204 | 388  | 3.58  | 1.18E-10 | 1.06E-08 | ENSMUSG00000011150AC140409.2   | lincRNA      | 40606416 | 40616386 | upstream     | -6624  | 6431   | shortestDistance |
| chr9 | 40641322 | 40641807 | 486  | 3.58  | 2.01E-15 | 1.09E-12 | ENSMUSG00000011150AC140409.2   | lincRNA      | 40606416 | 40616386 | upstream     | -25178 | 24936  | shortestDistance |
| chr9 | 40699212 | 40699521 | 310  | 4.92  | 5.92E-12 | 8.42E-10 | ENSMUSG00000003202Cmp          | protein_codi | 40685962 | 40785319 | inside       | 13404  | 13250  | shortestDistance |
| chr9 | 40727568 | 40728122 | 555  | 3.2   | 3.09E-12 | 4.80E-10 | ENSMUSG00000003202Cmp          | protein_codi | 40685962 | 40785319 | inside       | 41883  | 41606  | shortestDistance |
| chr9 | 40806431 | 40807350 | 920  | 1.27  | 0.000119 | 0.00129  | ENSMUSG00000001565Hspa8        | protein_codi | 40800984 | 40810087 | inside       | 5906   | 2737   | shortestDistance |
| chr9 | 40814021 | 40815011 | 991  | 2.38  | 2.04E-07 | 6.13E-06 | ENSMUSG00000001565Hspa8        | protein_codi | 40800984 | 40810087 | downstream   | 13532  | 3934   | shortestDistance |
| chr9 | 40834647 | 40834969 | 323  | 1.25  | 0.00792  | 0.0355   | ENSMUSG00000011098AC158355.1   | TEC          | 40820969 | 40822673 | downstream   | 13839  | 11974  | shortestDistance |
| chr9 | 41044634 | 41044923 | 288  | 1.43  | 0.0043   | 0.0222   | ENSMUSG00000003202Ubash3b      | protein_codi | 41011098 | 41161697 | inside       | 116917 | 3538   | shortestDistance |
| chr9 | 41070649 | 41071271 | 623  | 0.87  | 0.00851  | 0.0375   | ENSMUSG00000003202Ubash3b      | protein_codi | 41011098 | 41161697 | inside       | 90737  | 59551  | shortestDistance |
| chr9 | 41072105 | 41072480 | 376  | 1.52  | 4.40E-05 | 0.000569 | ENSMUSG00000003202Ubash3b      | protein_codi | 41011098 | 41161697 | inside       | 89405  | 61007  | shortestDistance |
| chr9 | 41087999 | 41088375 | 377  | 1.18  | 0.00304  | 0.017    | ENSMUSG00000003202Ubash3b      | protein_codi | 41011098 | 41161697 | inside       | 73510  | 73322  | shortestDistance |
| chr9 | 41212623 | 41213000 | 378  | -1    | 0.00733  | 0.0335   | ENSMUSG000000100831700063D051  | lincRNA      | 41192446 | 41217990 | inside       | 20366  | 4990   | shortestDistance |
| chr9 | 41480049 | 41480407 | 359  | 2.01  | 1.23E-05 | 0.000197 | ENSMUSG00000011155TC009696.3   | lincRNA      | 41405374 | 41532087 | inside       | 51859  | 51680  | shortestDistance |
| chr9 | 41860675 | 41861022 | 348  | -1.56 | 0.000427 | 0.00364  | ENSMUSG00000011116Gm39321      | processed_tr | 41803165 | 41876268 | inside       | 15420  | 15246  | shortestDistance |
| chr9 | 42038920 | 42039349 | 430  | -1.73 | 6.34E-05 | 0.00077  | ENSMUSG00000004931Sor1         | protein_codi | 41964720 | 42124297 | inside       | 85163  | 74200  | shortestDistance |
| chr9 | 42094676 | 42095165 | 490  | -1.23 | 0.000563 | 0.00453  | ENSMUSG00000004931Sor1         | protein_codi | 41964720 | 42124297 | inside       | 29377  | 29132  | shortestDistance |
| chr9 | 42127910 | 42128394 | 485  | 2.39  | 9.69E-09 | 3.42E-07 | ENSMUSG00000004931Sor1         | protein_codi | 41964720 | 42124297 | upstream     | -3855  | 3613   | shortestDistance |
| chr9 | 42141528 | 42142203 | 676  | 1.51  | 0.000212 | 0.00207  | ENSMUSG00000011116Gm39321      | lincRNA      | 42141993 | 42146506 | overlapStart | -127   | 210    | shortestDistance |
| chr9 | 42158570 | 42159070 | 501  | 1.16  | 0.00248  | 0.0145   | ENSMUSG00000011116Gm39321      | lincRNA      | 42141993 | 42146506 | downstream   | 16827  | 12064  | shortestDistance |
| chr9 | 42306400 | 42306706 | 307  | 2.61  | 6.34E-07 | 1.60E-05 | ENSMUSG00000009611Gm26272      | snoRNA       | 42317550 | 42317681 | downstream   | 11128  | 10844  | shortestDistance |
| chr9 | 42520567 | 42521067 | 501  | -1.12 | 0.00391  | 0.0206   | ENSMUSG00000009374Gm24420      | misc_RNA     | 42520773 | 42520831 | includeFeatu | 14     | 206    | shortestDistance |
| chr9 | 42799455 | 42799751 | 297  | -1.25 | 0.00307  | 0.0171   | ENSMUSG00000003201Grik4        | protein_codi | 42518135 | 42944493 | inside       | 144890 | 144742 | shortestDistance |
| chr9 | 42837499 | 42837913 | 415  | 1.4   | 0.000357 | 0.00316  | ENSMUSG00000003201Grik4        | protein_codi | 42518135 | 42944493 | inside       | 106787 | 106580 | shortestDistance |
| chr9 | 42871672 | 42872160 | 489  | 2.3   | 9.01E-09 | 4.26E-07 | ENSMUSG00000003201Grik4        | protein_codi | 42518135 | 42944493 | inside       | 72577  | 72333  | shortestDistance |
| chr9 | 42881065 | 42881472 | 408  | 1.57  | 0.000435 | 0.0037   | ENSMUSG00000003201Grik4        | protein_codi | 42518135 | 42944493 | inside       | 63225  | 63021  | shortestDistance |
| chr9 | 43227530 | 43228090 | 561  | 2.12  | 2.53E-07 | 7.36E-06 | ENSMUSG00000003201Oaf          | protein_codi | 43221235 | 43239911 | inside       | 12101  | 6295   | shortestDistance |
| chr9 | 43234520 | 43234891 | 372  | 1.58  | 0.00364  | 0.0195   | ENSMUSG00000003201Oaf          | protein_codi | 43221235 | 43239911 | inside       | 5205   | 5020   | shortestDistance |
| chr9 | 43242479 | 43242816 | 338  | 1.64  | 0.000344 | 0.00307  | ENSMUSG00000009538D630033011   | lincRNA      | 43243599 | 43280076 | upstream     | -951   | 783    | shortestDistance |
| chr9 | 44013015 | 44013430 | 416  | 1.37  | 0.000573 | 0.0046   | ENSMUSG00000011122Gm39323      | lincRNA      | 44011735 | 44041059 | inside       | 27837  | 1280   | shortestDistance |
| chr9 | 44084685 | 44085198 | 514  | 0.94  | 0.00591  | 0.0283   | ENSMUSG00000003201Usp2         | protein_codi | 44067021 | 44095627 | inside       | 17921  | 10429  | shortestDistance |
| chr9 | 44088906 | 44089645 | 740  | 1.3   | 0.000132 | 0.0014   | ENSMUSG00000003201Usp2         | protein_codi | 44067021 | 44095627 | inside       | 22255  | 5982   | shortestDistance |
| chr9 | 44126091 | 44126430 | 340  | 1.41  | 0.000898 | 0.00655  | ENSMUSG00000009761Gm10687      | antisense_RI | 44122186 | 44134485 | inside       | 8225   | 3905   | shortestDistance |
| chr9 | 44267918 | 44269502 | 1135 | 0.98  | 0.00242  | 0.0143   | ENSMUSG00000003210Nlr1         | protein_codi | 44252717 | 44268599 | overlapStart | 114    | 453    | shortestDistance |
| chr9 | 44396687 | 44397467 | 781  | 1.09  | 0.000866 | 0.00636  | ENSMUSG00000003211Sc37a4       | protein_codi | 44396852 | 44402968 | overlapStart | 225    | 165    | shortestDistance |
| chr9 | 44417676 | 44418407 | 732  | 0.84  | 0.0112   | 0.0461   | ENSMUSG00000004392Cdc84        | protein_codi | 44410159 | 44418569 | inside       | 527    | 162    | shortestDistance |
| chr9 | 44582405 |          |      |       |          |          |                                |              |          |          |              |        |        |                  |

|      |          |          |      |       |          |          |                    |            |              |          |          |              |        |       |                  |
|------|----------|----------|------|-------|----------|----------|--------------------|------------|--------------|----------|----------|--------------|--------|-------|------------------|
| chr9 | 50478896 | 50479973 | 1078 | 2.16  | 1.37E-06 | 3.06E-05 | ENSMUSG0000010130  | Plet1os    | antisense_RI | 50488795 | 50507823 | downstream   | 28389  | 8822  | shortestDistance |
| chr9 | 50482767 | 50483130 | 364  | 2.29  | 5.38E-07 | 1.39E-05 | ENSMUSG0000010130  | Plet1os    | antisense_RI | 50488795 | 50507823 | downstream   | 24875  | 5665  | shortestDistance |
| chr9 | 50502823 | 50503305 | 483  | 1.44  | 0.000681 | 0.00528  | ENSMUSG0000010130  | Plet1os    | antisense_RI | 50488795 | 50507823 | inside       | 4759   | 4518  | shortestDistance |
| chr9 | 50520593 | 50521166 | 574  | 1.08  | 0.00242  | 0.0143   | ENSMUSG00000003206 | Pts        | protein_codi | 50521617 | 50528724 | downstream   | 7844   | 451   | shortestDistance |
| chr9 | 50522588 | 50522975 | 388  | 3.62  | 1.44E-11 | 1.81E-09 | ENSMUSG00000003206 | Pts        | protein_codi | 50521617 | 50528724 | inside       | 5942   | 971   | shortestDistance |
| chr9 | 50590820 | 50591498 | 679  | 1.23  | 0.000238 | 0.00227  | ENSMUSG0000000017  | Shdh       | protein_codi | 50596357 | 50603812 | downstream   | 12653  | 4859  | shortestDistance |
| chr9 | 50592998 | 50593296 | 299  | 2.8   | 2.91E-08 | 1.18E-06 | ENSMUSG0000000017  | Shdh       | protein_codi | 50596357 | 50603812 | downstream   | 10665  | 3061  | shortestDistance |
| chr9 | 50593608 | 50593892 | 285  | 1.53  | 0.000443 | 0.00375  | ENSMUSG0000000017  | Shdh       | protein_codi | 50596357 | 50603812 | downstream   | 10062  | 2465  | shortestDistance |
| chr9 | 50616711 | 50617641 | 931  | 0.8   | 0.00892  | 0.0389   | ENSMUSG00000005982 | AU019823   | protein_codi | 50605240 | 50617464 | overlapStart | 288    | 177   | shortestDistance |
| chr9 | 50659017 | 50660067 | 1051 | 0.78  | 0.0112   | 0.0462   | ENSMUSG00000000016 | Dlat       | protein_codi | 50634633 | 50659780 | overlapStart | 238    | 287   | shortestDistance |
| chr9 | 50711159 | 50711760 | 602  | 2.21  | 6.72E-07 | 1.68E-05 | ENSMUSG00000003206 | Dixdc1     | protein_codi | 50662752 | 50739517 | inside       | 28057  | 27757 | shortestDistance |
| chr9 | 50833811 | 50834364 | 554  | 1.18  | 0.00243  | 0.0143   | ENSMUSG00000003205 | Alg9       | protein_codi | 50775019 | 50843542 | inside       | 59069  | 9178  | shortestDistance |
| chr9 | 50834982 | 50835418 | 437  | 2.98  | 1.41E-10 | 1.23E-08 | ENSMUSG00000003205 | Alg9       | protein_codi | 50775019 | 50843542 | inside       | 60181  | 8124  | shortestDistance |
| chr9 | 50905323 | 50905652 | 330  | 1.41  | 0.00106  | 0.00747  | ENSMUSG00000003711 | Sik2       | protein_codi | 50892801 | 51009073 | inside       | 103585 | 12522 | shortestDistance |
| chr9 | 50944713 | 50945208 | 496  | 1.01  | 0.00639  | 0.0301   | ENSMUSG00000003711 | Sik2       | protein_codi | 50892801 | 51009073 | inside       | 64113  | 51912 | shortestDistance |
| chr9 | 51021180 | 51021747 | 568  | 3.03  | 2.86E-10 | 2.23E-08 | ENSMUSG00000003711 | Sik2       | protein_codi | 50892801 | 51009073 | upstream     | -12391 | 12107 | shortestDistance |
| chr9 | 51273705 | 51274121 | 417  | 1.07  | 0.00634  | 0.0299   | ENSMUSG00000007955 | Colca2     | protein_codi | 51270258 | 51278569 | inside       | 4656   | 3447  | shortestDistance |
| chr9 | 52287726 | 52288262 | 537  | 1.4   | 0.000139 | 0.00146  | ENSMUSG00000007779 | Gm25562    | snRNA        | 52291199 | 52291331 | upstream     | -3205  | 2937  | shortestDistance |
| chr9 | 52623859 | 52624540 | 682  | 0.96  | 0.00889  | 0.0388   | ENSMUSG00000007830 | Al593442   | protein_codi | 52673042 | 52679780 | downstream   | 55580  | 48502 | shortestDistance |
| chr9 | 53398238 | 53398661 | 424  | 1.02  | 0.00812  | 0.0363   | ENSMUSG00000003448 | Kdelc1     | protein_codi | 53384025 | 53401867 | inside       | 14425  | 3206  | shortestDistance |
| chr9 | 53700473 | 53701018 | 546  | 1.67  | 4.22E-05 | 0.000549 | ENSMUSG00000005306 | Rab39      | protein_codi | 53684110 | 53706232 | inside       | 5486   | 5214  | shortestDistance |
| chr9 | 53705733 | 53706783 | 1051 | 1.4   | 1.80E-05 | 0.00027  | ENSMUSG00000005506 | Rab39      | protein_codi | 53684110 | 53706232 | overlapStart | -256   | 499   | shortestDistance |
| chr9 | 54022728 | 54023286 | 559  | -1.05 | 0.00382  | 0.0202   | ENSMUSG00000007434 | Tnfr1aIP83 | protein_codi | 54023405 | 54068388 | downstream   | 45381  | 119   | shortestDistance |
| chr9 | 54062917 | 54063311 | 395  | 1.42  | 0.00233  | 0.0139   | ENSMUSG00000007434 | Tnfr1aIP83 | protein_codi | 54023405 | 54068388 | inside       | 5274   | 5077  | shortestDistance |
| chr9 | 54063592 | 54063999 | 408  | 1.95  | 6.45E-06 | 0.000114 | ENSMUSG00000007434 | Tnfr1aIP83 | protein_codi | 54023405 | 54068388 | inside       | 4592   | 4389  | shortestDistance |
| chr9 | 54221872 | 54222022 | 331  | -1.31 | 0.0084   | 0.0372   | ENSMUSG00000003227 | Cyp19a1    | protein_codi | 54165937 | 54268110 | inside       | 46073  | 45908 | shortestDistance |
| chr9 | 54467488 | 54468074 | 587  | 0.94  | 0.00385  | 0.0203   | ENSMUSG00000004126 | Dmxl2      | protein_codi | 54365158 | 54501626 | inside       | 33845  | 33552 | shortestDistance |
| chr9 | 54469358 | 54469708 | 351  | 1.97  | 3.12E-07 | 8.78E-06 | ENSMUSG00000004126 | Dmxl2      | protein_codi | 54365158 | 54501626 | inside       | 32093  | 31918 | shortestDistance |
| chr9 | 54501165 | 54502297 | 1133 | 0.87  | 0.00744  | 0.0339   | ENSMUSG00000004126 | Dmxl2      | protein_codi | 54365158 | 54501626 | overlapStart | -105   | 461   | shortestDistance |
| chr9 | 54734344 | 54734784 | 441  | 0.8   | 0.0117   | 0.0478   | ENSMUSG00000006155 | Wdr61      | protein_codi | 54714735 | 54734519 | overlapStart | -45    | 175   | shortestDistance |
| chr9 | 55244106 | 55244441 | 336  | 1.27  | 0.00646  | 0.0304   | ENSMUSG00000003231 | Nrg4       | protein_codi | 55220222 | 55326844 | inside       | 82570  | 23884 | shortestDistance |
| chr9 | 55255622 | 55256113 | 492  | 2.97  | 6.10E-11 | 6.05E-09 | ENSMUSG00000003231 | Nrg4       | protein_codi | 55220222 | 55326844 | inside       | 70976  | 35400 | shortestDistance |
| chr9 | 55296208 | 55296810 | 603  | 2.93  | 9.62E-12 | 1.29E-09 | ENSMUSG00000003231 | Nrg4       | protein_codi | 55220222 | 55326844 | inside       | 30335  | 30034 | shortestDistance |
| chr9 | 56079636 | 56079994 | 359  | 1.02  | 0.0102   | 0.043    | ENSMUSG00000003232 | Pstpip1    | protein_codi | 56089962 | 56128888 | upstream     | -10147 | 9968  | shortestDistance |
| chr9 | 56097600 | 56098237 | 638  | 1.35  | 0.00028  | 0.00259  | ENSMUSG00000003232 | Pstpip1    | protein_codi | 56089962 | 56128888 | inside       | 7956   | 7638  | shortestDistance |
| chr9 | 56104248 | 56104625 | 378  | 1.29  | 0.00131  | 0.00883  | ENSMUSG00000003232 | Pstpip1    | protein_codi | 56089962 | 56128888 | inside       | 14474  | 14286 | shortestDistance |
| chr9 | 56105138 | 56105377 | 240  | 1.6   | 7.69E-05 | 0.000898 | ENSMUSG00000003232 | Pstpip1    | protein_codi | 56089962 | 56128888 | inside       | 15296  | 15176 | shortestDistance |
| chr9 | 56108146 | 56108640 | 495  | 1.26  | 0.00071  | 0.00545  | ENSMUSG00000003232 | Pstpip1    | protein_codi | 56089962 | 56128888 | inside       | 18431  | 18184 | shortestDistance |
| chr9 | 56417506 | 56418713 | 1208 | 0.81  | 0.0101   | 0.0427   | ENSMUSG00000007430 | Peak1      | protein_codi | 56201126 | 56418067 | overlapStart | -43    | 561   | shortestDistance |
| chr9 | 57233714 | 57234170 | 457  | 2.77  | 1.92E-08 | 8.20E-07 | ENSMUSG00000007029 | Ttrc1      | protein_codi | 57236556 | 57249864 | upstream     | -2614  | 2386  | shortestDistance |
| chr9 | 57319067 | 57319497 | 431  | 1.78  | 7.35E-05 | 0.00865  | ENSMUSG0000011145  | Gm18996    | processed_p  | 57328661 | 57329415 | downstream   | 10133  | 9164  | shortestDistance |
| chr9 | 57343789 | 57344054 | 266  | -1.11 | 0.00769  | 0.0347   | ENSMUSG00000006662 | Gm5121     | processed_p  | 57334128 | 57334754 | downstream   | 9794   | 9035  | shortestDistance |
| chr9 | 57562917 | 57563376 | 460  | 1.84  | 1.56E-06 | 3.41E-05 | ENSMUSG00000004185 | Scamp2     | protein_codi | 57560943 | 57588795 | inside       | 2203   | 1974  | shortestDistance |
| chr9 | 57645260 | 57645862 | 603  | 1.05  | 0.00337  | 0.0184   | ENSMUSG00000003231 | Csk        | protein_codi | 57626646 | 57653631 | inside       | 8070   | 7769  | shortestDistance |
| chr9 | 57785763 | 57786050 | 288  | 2.08  | 0.000199 | 0.00192  | ENSMUSG00000003930 | P17231     | antisense_RI | 57777865 | 57834295 | inside       | 8041   | 7898  | shortestDistance |
| chr9 | 58085290 | 58085537 | 248  | 2.2   | 0.000193 | 0.00192  | ENSMUSG00000003232 | Stra6      | protein_codi | 58063788 | 58153996 | inside       | 21626  | 21502 | shortestDistance |
| chr9 | 58252948 | 58253543 | 596  | 0.92  | 0.00304  | 0.017    | ENSMUSG00000003233 | Tom1l      | protein_codi | 58253164 | 58262520 | overlapStart | 82     | 216   | shortestDistance |
| chr9 | 58268906 | 58269292 | 387  | 1.21  | 0.00263  | 0.0152   | ENSMUSG00000003233 | Tom1l      | protein_codi | 58253164 | 58262520 | downstream   | 15935  | 6386  | shortestDistance |
| chr9 | 58275099 | 58276204 | 1106 | 1.05  | 0.00249  | 0.0146   | ENSMUSG00000003233 | Loxl1      | protein_codi | 58287738 | 58313186 | downstream   | 37534  | 11534 | shortestDistance |
| chr9 | 58552137 | 58552432 | 296  | 2.35  | 3.09E-06 | 6.10E-05 | ENSMUSG00000003591 | Id2        | protein_codi | 58524298 | 58555437 | inside       | 3153   | 3005  | shortestDistance |
| chr9 | 58578768 | 58579013 | 246  | 1.23  | 0.00246  | 0.0144   | ENSMUSG00000003233 | Np76       | protein_codi | 58582240 | 58657955 | upstream     | -3350  | 3227  | shortestDistance |
| chr9 | 59291081 | 59292063 | 983  | 0.81  | 0.0123   | 0.0496   | ENSMUSG00000002523 | Adgkq      | protein_codi | 59291558 | 59324052 | overlapStart | 14     | 477   | shortestDistance |
| chr9 | 59544737 | 59545189 | 453  | 1.36  | 0.00102  | 0.00726  | ENSMUSG00000003233 | Hexa       | protein_codi | 59539540 | 59565109 | inside       | 5423   | 5197  | shortestDistance |
| chr9 | 59653429 | 59653707 | 279  | 1.92  | 6.33E-07 | 1.59E-05 | ENSMUSG00000003239 | Pkm        | protein_codi | 59653638 | 59679375 | upstream     | -2800  | 2661  | shortestDistance |
| chr9 | 59655928 | 59656719 | 792  | 0.87  | 0.0122   | 0.0493   | ENSMUSG00000003239 | Pkm        | protein_codi | 59653638 | 59679375 | overlapStart | -44    | 351   | shortestDistance |
| chr9 | 59659787 | 59660050 | 264  | 0.98  | 0.00492  | 0.0246   | ENSMUSG00000003239 | Pkm        | protein_codi | 59653638 | 59679375 | inside       | 3550   | 3419  | shortestDistance |
| chr9 | 59969435 | 59969729 | 295  | -1.19 | 0.00379  | 0.0201   | ENSMUSG00000003232 | Thsd4      | protein_codi | 59966931 | 60522046 | inside       | 552464 | 2504  | shortestDistance |
| chr9 | 60678971 | 60679307 | 337  | -1.24 | 0.00284  | 0.0161   | ENSMUSG00000004776 | Lrrc49     | protein_codi | 60568859 | 60688158 | inside       | 9019   | 8851  | shortestDistance |
| chr9 | 60744200 | 60744935 | 736  | 0.95  | 0.0107   | 0.0447   | ENSMUSG00000005951 | 1700036A12 | lincRNA      | 60743120 | 60770276 | inside       | 1448   | 1080  | shortestDistance |
| chr9 | 60837374 | 60837964 | 591  | 1.38  | 0.000375 | 0.00329  | ENSMUSG00000005214 | Gm9869     | antisense_RI | 60821552 | 60838200 | inside       | 531    | 236   | shortestDistance |
| chr9 | 61002192 | 61023086 | 1165 | 1.17  | 0.00277  | 0.0158   | ENSMUSG0000011129  | Gm5122     | lincRNA      | 61013481 | 61019797 | downstream   | 9023   | 2125  | shortestDistance |
| chr9 | 61032040 | 61032442 | 403  | 1.42  | 0.000774 | 0.00582  | ENSMUSG0000011114  | AC160562.1 | lincRNA      | 61032212 | 61059116 | overlapStart | 29     | 172   | shortestDistance |
| chr9 | 61042027 | 61042652 | 626  | 1.64  | 8.01E-05 | 0.000929 | ENSMUSG0000011114  | AC160562.1 | lincRNA      | 61032212 | 61059116 | inside       | 10128  | 9815  | shortestDistance |
| chr9 | 61349630 | 61350240 | 611  | 0.85  | 0.0104   | 0.0438   | ENSMUSG00000007425 | Gm10655    | lincRNA      | 61370797 | 61372193 | downstream   | 22258  | 20557 | shortestDistance |
| chr9 | 61363172 | 61363596 | 425  | 3.66  | 9.73E-13 | 1.78E-10 | ENSMUSG00000007425 | Gm10655    | lincRNA      | 61370797 | 61372193 | downstream   | 8809   | 7201  | shortestDistance |
| chr9 | 61374041 | 61378059 | 459  | 0.87  | 0.00634  | 0.0299   | ENSMUSG00000007425 | Gm10655    | lincRNA      | 61370797 | 61372193 | overlapEnd   | 1563   | 62    | shortestDistance |
| chr9 | 61380192 | 61380814 | 623  | 1.12  | 0.00324  | 0.0178   | ENSMUSG00000003232 | Tle3       | protein_codi | 61372366 | 61418497 | inside       | 8137   | 7826  | shortestDistance |
| chr9 | 61826367 | 61826947 | 581  | 1.36  | 0.000189 | 0.00189  | ENSMUSG0000011096  | Gm19208    | processed_p  | 61851704 | 61852615 | upstream     | -25047 | 24757 | shortestDistance |
| chr9 | 62013325 | 62014067 | 743  | 1.72  | 1.93E-05 | 0.000286 | ENSMUSG00000003227 | Paq5       | protein_codi | 61953481 | 62026856 | inside       | 13160  | 12789 | shortestDistance |
| chr9 | 62137223 | 62137601 | 379  | 1.17  | 0.00506  | 0.0251   | ENSMUSG00000003225 | Glc        | protein_codi | 62057248 | 62122655 | upstream     | -14757 | 14568 | shortestDistance |
| chr9 | 62857840 | 62858104 | 265  | -1.1  | 0.00712  | 0.0327   | ENSMUSG00000003224 | Calml4     | protein_codi | 62858080 | 62875921 | overlapStart | -108   | 24    |                  |

|      |          |          |      |       |          |          |                   |            |              |          |          |              |        |        |                  |
|------|----------|----------|------|-------|----------|----------|-------------------|------------|--------------|----------|----------|--------------|--------|--------|------------------|
| chr9 | 69306833 | 69307166 | 334  | 3.44  | 2.43E-08 | 1.00E-06 | ENSMUSG0000003223 | Rora       | protein_codi | 68653786 | 69388246 | inside       | 653214 | 81080  | shortestDistance |
| chr9 | 69319571 | 69320132 | 562  | 1.2   | 0.00195  | 0.0121   | ENSMUSG0000003223 | Rora       | protein_codi | 68653786 | 69388246 | inside       | 666066 | 68114  | shortestDistance |
| chr9 | 69320302 | 69320985 | 684  | 1.32  | 0.000681 | 0.00527  | ENSMUSG0000003223 | Rora       | protein_codi | 68653786 | 69388246 | inside       | 666858 | 67261  | shortestDistance |
| chr9 | 69439722 | 69440398 | 677  | 1.46  | 2.16E-05 | 0.000314 | ENSMUSG0000011162 | Gm7802     | processed_p  | 69436986 | 69437247 | upstream     | -2813  | 2475   | shortestDistance |
| chr9 | 69442435 | 69443051 | 617  | 2.14  | 6.08E-08 | 2.18E-06 | ENSMUSG0000011109 | AC18587.1  | processed_p  | 69444963 | 69445803 | upstream     | -2220  | 1912   | shortestDistance |
| chr9 | 69667114 | 69667570 | 457  | 1.21  | 0.00253  | 0.0147   | ENSMUSG0000011109 | AC160016.1 | processed_p  | 69599307 | 69599754 | upstream     | -67588 | 67360  | shortestDistance |
| chr9 | 69987672 | 69987921 | 250  | 1.02  | 0.01     | 0.0425   | ENSMUSG0000010155 | Gm28731    | antisense_RI | 69988400 | 69989968 | downstream   | 2172   | 479    | shortestDistance |
| chr9 | 69989105 | 69990141 | 1037 | 0.81  | 0.00915  | 0.0397   | ENSMUSG0000010155 | Gm28731    | antisense_RI | 69988400 | 69989968 | overlapStart | 345    | 173    | shortestDistance |
| chr9 | 70260331 | 70260671 | 341  | 1.44  | 0.000141 | 0.00148  | ENSMUSG0000003222 | Myo1e      | protein_codi | 70207350 | 70399766 | inside       | 53151  | 52981  | shortestDistance |
| chr9 | 70282119 | 70282546 | 428  | 2.64  | 2.79E-10 | 2.18E-08 | ENSMUSG0000003222 | Myo1e      | protein_codi | 70207350 | 70399766 | inside       | 74982  | 74769  | shortestDistance |
| chr9 | 70284513 | 70285226 | 714  | 1.26  | 0.000174 | 0.00176  | ENSMUSG0000003222 | Myo1e      | protein_codi | 70207350 | 70399766 | inside       | 77520  | 77163  | shortestDistance |
| chr9 | 70585171 | 70585632 | 462  | 1.97  | 4.27E-06 | 8.02E-05 | ENSMUSG0000003221 | Sltm       | protein_codi | 70542754 | 70592234 | inside       | 42648  | 6602   | shortestDistance |
| chr9 | 70692028 | 70692266 | 239  | 2.29  | 7.28E-05 | 0.000859 | ENSMUSG0000005469 | Adam10     | protein_codi | 70678997 | 70780229 | inside       | 13150  | 13031  | shortestDistance |
| chr9 | 70838503 | 70838958 | 456  | 0.89  | 0.00653  | 0.0306   | ENSMUSG0000003220 | Lipc       | protein_codi | 70798128 | 70952226 | inside       | 113496 | 40375  | shortestDistance |
| chr9 | 70842342 | 70843128 | 787  | 0.95  | 0.00262  | 0.0152   | ENSMUSG0000003220 | Lipc       | protein_codi | 70798128 | 70952226 | inside       | 109491 | 44214  | shortestDistance |
| chr9 | 70848272 | 70848831 | 560  | 1.27  | 0.000279 | 0.00258  | ENSMUSG0000003220 | Lipc       | protein_codi | 70798128 | 70952226 | inside       | 103674 | 50144  | shortestDistance |
| chr9 | 70942641 | 70942970 | 330  | 1.31  | 0.00235  | 0.014    | ENSMUSG0000003220 | Lipc       | protein_codi | 70798128 | 70952226 | inside       | 9420   | 9256   | shortestDistance |
| chr9 | 71738610 | 71738852 | 243  | 1.63  | 0.00199  | 0.0123   | ENSMUSG0000003223 | Cgn1       | protein_codi | 71626509 | 71771602 | inside       | 32871  | 32750  | shortestDistance |
| chr9 | 71951136 | 71951809 | 674  | 1.24  | 0.00112  | 0.00783  | ENSMUSG0000003222 | Tcf12      | protein_codi | 71842688 | 72111871 | inside       | 160399 | 108448 | shortestDistance |
| chr9 | 71952555 | 71952915 | 361  | 1.09  | 0.00731  | 0.0334   | ENSMUSG0000003222 | Tcf12      | protein_codi | 71842688 | 72111871 | inside       | 159136 | 109867 | shortestDistance |
| chr9 | 72088856 | 72089570 | 715  | 1.82  | 4.89E-07 | 1.28E-05 | ENSMUSG0000003222 | Tcf12      | protein_codi | 71842688 | 72111871 | inside       | 22658  | 22301  | shortestDistance |
| chr9 | 72656925 | 72657322 | 398  | 1.13  | 0.00613  | 0.0291   | ENSMUSG0000003221 | Nedd4      | protein_codi | 72662346 | 72749852 | upstream     | -5222  | 5024   | shortestDistance |
| chr9 | 72660119 | 72660543 | 425  | 1.09  | 0.00088  | 0.00644  | ENSMUSG0000003221 | Nedd4      | protein_codi | 72662346 | 72749852 | upstream     | -2015  | 1803   | shortestDistance |
| chr9 | 72791719 | 72792128 | 410  | 1.98  | 3.62E-06 | 6.98E-05 | ENSMUSG0000003603 | Prtg       | protein_codi | 72806874 | 72917291 | upstream     | -14950 | 14746  | shortestDistance |
| chr9 | 72797006 | 72797597 | 592  | 1.89  | 4.22E-07 | 1.13E-05 | ENSMUSG0000003603 | Prtg       | protein_codi | 72806874 | 72917291 | upstream     | -9572  | 9277   | shortestDistance |
| chr9 | 72955615 | 72955863 | 249  | 1.03  | 0.0094   | 0.0405   | ENSMUSG0000009219 | Dyx1c1     | protein_codi | 72958785 | 72973064 | upstream     | -3046  | 2922   | shortestDistance |
| chr9 | 73058152 | 73058519 | 368  | 1.97  | 1.59E-05 | 0.000244 | ENSMUSG0000003220 | Rab27a     | protein_codi | 73044854 | 73097629 | inside       | 13482  | 13298  | shortestDistance |
| chr9 | 73085633 | 73086155 | 523  | 0.84  | 0.0085   | 0.0375   | ENSMUSG0000003220 | Rab27a     | protein_codi | 73044854 | 73097629 | inside       | 41040  | 11474  | shortestDistance |
| chr9 | 73089351 | 73090013 | 663  | 1.09  | 0.00507  | 0.0252   | ENSMUSG0000003220 | Rab27a     | protein_codi | 73044854 | 73097629 | inside       | 44828  | 7616   | shortestDistance |
| chr9 | 73159359 | 73159597 | 239  | 1.51  | 0.0109   | 0.0451   | ENSMUSG0000006647 | Gm5745     | processed_p  | 73175429 | 73175741 | downstream   | 16263  | 15832  | shortestDistance |
| chr9 | 73240149 | 73240959 | 811  | 1.21  | 0.00207  | 0.0126   | ENSMUSG0000009887 | Gm27211    | lincRNA      | 73192483 | 73268115 | inside       | 48071  | 27156  | shortestDistance |
| chr9 | 73317059 | 73317564 | 506  | 1.29  | 0.00141  | 0.00936  | ENSMUSG0000009887 | Gm27211    | lincRNA      | 73192483 | 73268115 | downstream   | 124829 | 48944  | shortestDistance |
| chr9 | 73725805 | 73726059 | 255  | -1.18 | 0.00568  | 0.0275   | ENSMUSG0000006215 | Unc13c     | protein_codi | 73479422 | 73968966 | inside       | 243034 | 242907 | shortestDistance |
| chr9 | 74241276 | 74241680 | 405  | 3.47  | 3.54E-11 | 3.85E-09 | ENSMUSG0000004497 | Wdr72      | protein_codi | 74110356 | 74283308 | inside       | 311122 | 41628  | shortestDistance |
| chr9 | 74425670 | 74426118 | 449  | 1.42  | 0.00115  | 0.00794  | ENSMUSG0000009831 | Nrlh2-ps   | processed_p  | 74364586 | 74365063 | upstream     | -60831 | 60607  | shortestDistance |
| chr9 | 74952085 | 74952426 | 342  | 1.35  | 0.00046  | 0.00387  | ENSMUSG0000003485 | Fam214a    | protein_codi | 74952884 | 75032468 | upstream     | -628   | 458    | shortestDistance |
| chr9 | 75280803 | 75281169 | 267  | 1.5   | 0.00537  | 0.0263   | ENSMUSG0000003359 | Myo5c      | protein_codi | 75232020 | 75305451 | inside       | 49016  | 24282  | shortestDistance |
| chr9 | 75282857 | 75283185 | 329  | 1.62  | 0.000107 | 0.00118  | ENSMUSG0000003359 | Myo5c      | protein_codi | 75232020 | 75305451 | inside       | 51001  | 22266  | shortestDistance |
| chr9 | 75342344 | 75343145 | 802  | 4.09  | 3.70E-18 | 8.33E-15 | ENSMUSG0000011082 | AC133947.1 | antisense_RI | 75317072 | 75342842 | overlapStart | 98     | 303    | shortestDistance |
| chr9 | 75361731 | 75362735 | 1005 | 1.41  | 0.000212 | 0.00207  | ENSMUSG0000004268 | Mapk6      | protein_codi | 75369062 | 75410005 | downstream   | 47772  | 6327   | shortestDistance |
| chr9 | 75369204 | 75369712 | 509  | 2.52  | 1.55E-08 | 6.86E-07 | ENSMUSG0000004268 | Mapk6      | protein_codi | 75369062 | 75410005 | inside       | 40547  | 142    | shortestDistance |
| chr9 | 75407853 | 75408143 | 291  | 0.97  | 0.00288  | 0.0163   | ENSMUSG0000004268 | Mapk6      | protein_codi | 75369062 | 75410005 | inside       | 2007   | 1862   | shortestDistance |
| chr9 | 75409213 | 75410445 | 1233 | 0.83  | 0.0109   | 0.0452   | ENSMUSG0000004268 | Mapk6      | protein_codi | 75369062 | 75410005 | overlapStart | 176    | 440    | shortestDistance |
| chr9 | 75425840 | 75426193 | 354  | 2.32  | 5.74E-08 | 2.08E-06 | ENSMUSG0000009702 | 4933433G15 | lincRNA      | 75410184 | 75417709 | downstream   | 15832  | 8131   | shortestDistance |
| chr9 | 75429041 | 75429432 | 392  | 1.24  | 0.00636  | 0.03     | ENSMUSG0000009702 | 4933433G15 | lincRNA      | 75410184 | 75417709 | downstream   | 19052  | 11332  | shortestDistance |
| chr9 | 75632998 | 75633257 | 260  | 1.34  | 0.00463  | 0.0234   | ENSMUSG0000003218 | Lysmd2     | protein_codi | 75625741 | 75637771 | inside       | 7387   | 4514   | shortestDistance |
| chr9 | 75934232 | 75934739 | 508  | -1.74 | 0.000151 | 0.00156  | ENSMUSG0000003225 | Fam83b     | antisense_RI | 75897843 | 76015192 | inside       | 80706  | 36389  | shortestDistance |
| chr9 | 76024183 | 76024682 | 500  | -0.95 | 0.00488  | 0.0244   | ENSMUSG000000790  | Hmgcl1     | protein_codi | 76014855 | 76136350 | inside       | 9577   | 9328   | shortestDistance |
| chr9 | 76407602 | 76408117 | 516  | 2.17  | 4.68E-07 | 1.24E-05 | ENSMUSG0000003235 | Fam83b     | protein_codi | 76490054 | 76567116 | downstream   | 159256 | 81937  | shortestDistance |
| chr9 | 76705795 | 76706080 | 286  | -1.95 | 6.69E-05 | 0.000804 | ENSMUSG0000007714 | Gm22938    | snoRNA       | 76716628 | 76716747 | downstream   | 10809  | 10548  | shortestDistance |
| chr9 | 76722861 | 76723241 | 381  | -1.51 | 1.98E-05 | 0.000293 | ENSMUSG0000007714 | Gm22938    | snoRNA       | 76716628 | 76716747 | upstream     | -6304  | 6114   | shortestDistance |
| chr9 | 76891573 | 76891799 | 227  | -1.33 | 0.00231  | 0.0138   | ENSMUSG0000009888 | Gm18486    | processed_p  | 76869186 | 76869483 | upstream     | -22203 | 22090  | shortestDistance |
| chr9 | 76905479 | 76905770 | 292  | -1.07 | 0.0107   | 0.0446   | ENSMUSG0000009888 | Gm18486    | processed_p  | 76869186 | 76869483 | upstream     | -36141 | 35996  | shortestDistance |
| chr9 | 77528666 | 77529078 | 413  | 1.76  | 1.76E-06 | 3.77E-05 | ENSMUSG0000003235 | Lrrc1      | protein_codi | 77430823 | 77544870 | inside       | 15998  | 15792  | shortestDistance |
| chr9 | 77537287 | 77537885 | 599  | 1.42  | 0.00283  | 0.00262  | ENSMUSG0000003235 | Lrrc1      | protein_codi | 77430823 | 77544870 | inside       | 7284   | 6985   | shortestDistance |
| chr9 | 77828400 | 77829014 | 615  | 1.33  | 0.000845 | 0.00625  | ENSMUSG0000011125 | AC159886.2 | lincRNA      | 77836030 | 77848111 | upstream     | -7323  | 7016   | shortestDistance |
| chr9 | 77858165 | 77858883 | 719  | 2.13  | 1.19E-07 | 3.85E-06 | ENSMUSG0000011158 | Gm19572    | processed_p  | 77851708 | 77852045 | downstream   | 6816   | 6120   | shortestDistance |
| chr9 | 77992260 | 77992650 | 391  | -1.21 | 0.00286  | 0.0162   | ENSMUSG0000011161 | Gm34829    | lincRNA      | 77992599 | 78002261 | overlapStart | -144   | 51     | shortestDistance |
| chr9 | 78022162 | 78022674 | 513  | 2.56  | 5.51E-11 | 5.58E-09 | ENSMUSG0000011133 | Gm39375    | lincRNA      | 78015018 | 78020703 | downstream   | 7400   | 1459   | shortestDistance |
| chr9 | 78050366 | 78050742 | 377  | 1.89  | 0.000402 | 0.00348  | ENSMUSG0000002333 | Gcm1       | protein_codi | 78051924 | 78065624 | upstream     | -1370  | 1182   | shortestDistance |
| chr9 | 78463422 | 78464020 | 599  | 2.21  | 1.05E-06 | 2.44E-05 | ENSMUSG0000003234 | Mto1       | protein_codi | 78448208 | 78475348 | inside       | 15513  | 11328  | shortestDistance |
| chr9 | 78533236 | 78533888 | 653  | 1.47  | 7.86E-05 | 0.000914 | ENSMUSG0000004962 | Slc17a5    | protein_codi | 78536488 | 78588041 | downstream   | 54479  | 2600   | shortestDistance |
| chr9 | 78821520 | 78822142 | 623  | -1.13 | 0.00315  | 0.0174   | ENSMUSG0000005942 | Gm8116     | processed_p  | 78820638 | 78821838 | overlapStart | 7      | 304    | shortestDistance |
| chr9 | 79750731 | 79751471 | 741  | -1.11 | 0.00243  | 0.0143   | ENSMUSG0000003233 | Cox7a2     | protein_codi | 79755361 | 79759878 | downstream   | 8777   | 3890   | shortestDistance |
| chr9 | 79762253 | 79762858 | 336  | 7.22  | 9.78E-15 | 4.11E-12 | ENSMUSG0000003233 | Cox7a2     | protein_codi | 79755361 | 79759878 | upstream     | -2812  | 2645   | shortestDistance |
| chr9 | 79815583 | 79816407 | 825  | 2.6   | 1.20E-07 | 3.89E-06 | ENSMUSG0000003489 | Filip1     | protein_codi | 79815051 | 80012851 | inside       | 196856 | 532    | shortestDistance |
| chr9 | 79816452 | 79816859 | 408  | 1.46  | 0.000123 | 0.00132  | ENSMUSG0000003489 | Filip1     | protein_codi | 79815051 | 80012851 | inside       | 196195 | 1401   | shortestDistance |
| chr9 | 79830902 | 79831190 | 289  | 1.4   | 0.00808  | 0.0361   | ENSMUSG0000003489 | Filip1     | protein_codi | 79815051 | 80012851 | inside       | 181805 | 15851  | shortestDistance |
| chr9 | 79847152 | 79847535 | 384  | 2.19  | 1.96E-06 | 4.14E-05 | ENSMUSG0000003489 | Filip1     | protein_codi | 79815051 | 80012851 | inside       | 165507 | 32101  | shortestDistance |
| chr9 | 79866024 | 79866350 | 327  | -1.03 | 0.0103   | 0.0434   | ENSMUSG0000003489 | Filip1     | protein_codi | 79815051 | 80012851 | inside       | 146664 | 50973  | shortestDistance |
| chr9 | 79952773 | 79953064 | 292  | 1.77  | 2.66E-05 | 0.000376 | ENSMUSG0000003489 | Filip1     | protein_codi | 79815051 | 80012851 | inside       | 59933  | 59787  | shortestDistance |
| chr9 | 7        |          |      |       |          |          |                   |            |              |          |          |              |        |        |                  |

|      |          |          |      |       |          |          |                               |              |          |          |              |        |       |                  |
|------|----------|----------|------|-------|----------|----------|-------------------------------|--------------|----------|----------|--------------|--------|-------|------------------|
| chr9 | 83023626 | 83024084 | 459  | -1.24 | 0.000827 | 0.00614  | ENSMUSG0000001183Gm39383      | lincRNA      | 83008603 | 83042603 | inside       | 15252  | 15023 | shortestDistance |
| chr9 | 83059063 | 83059549 | 487  | 1.01  | 0.00386  | 0.0204   | ENSMUSG00000009918Gm27248     | processed_p  | 83073223 | 83073388 | downstream   | 14082  | 13674 | shortestDistance |
| chr9 | 83145657 | 83147091 | 1435 | -1.03 | 0.00373  | 0.0199   | ENSMUSG00000010114Gm29054     | processed_tr | 83145915 | 83147364 | overlapStart | 459    | 258   | shortestDistance |
| chr9 | 83256778 | 83257401 | 624  | -1.22 | 0.00128  | 0.00866  | ENSMUSG00000009874Gm27216     | lincRNA      | 83240481 | 83254540 | upstream     | -2550  | 2238  | shortestDistance |
| chr9 | 83283615 | 83283620 | 456  | -2.01 | 1.32E-05 | 0.000208 | ENSMUSG00000009874Gm27216     | lincRNA      | 83240481 | 83254540 | upstream     | -28852 | 28625 | shortestDistance |
| chr9 | 83283928 | 83284542 | 615  | -1.35 | 0.000256 | 0.00241  | ENSMUSG00000009874Gm27216     | lincRNA      | 83240481 | 83254540 | upstream     | -29695 | 29388 | shortestDistance |
| chr9 | 83342623 | 83343378 | 756  | -1.23 | 0.00134  | 0.00899  | ENSMUSG00000011144Gm46123     | lincRNA      | 83346159 | 83353978 | upstream     | -3159  | 2781  | shortestDistance |
| chr9 | 83375610 | 83376211 | 602  | 1.22  | 0.00285  | 0.0161   | ENSMUSG00000003225Lca5        | protein_codi | 83390293 | 83441127 | downstream   | 65217  | 14082 | shortestDistance |
| chr9 | 83398088 | 83398616 | 529  | -1.19 | 0.000704 | 0.00541  | ENSMUSG00000003225Lca5        | protein_codi | 83390293 | 83441127 | inside       | 42775  | 7795  | shortestDistance |
| chr9 | 83447730 | 83448285 | 556  | -0.78 | 0.00958  | 0.0411   | ENSMUSG00000010304Gm37307     | TEC          | 83447559 | 83450179 | inside       | 449    | 171   | shortestDistance |
| chr9 | 83482312 | 83482554 | 243  | -1.66 | 0.000172 | 0.00175  | ENSMUSG00000009981Gm28552     | processed_p  | 83480032 | 83480419 | downstream   | 2401   | 1893  | shortestDistance |
| chr9 | 83563888 | 83564626 | 739  | -1.25 | 0.000225 | 0.00218  | ENSMUSG00000003226Sh3bgr12    | protein_codi | 83548327 | 83638801 | inside       | 15930  | 15561 | shortestDistance |
| chr9 | 83572957 | 83573220 | 264  | -1.25 | 0.00328  | 0.018    | ENSMUSG00000011095Gm39384     | lincRNA      | 83571560 | 83573289 | inside       | 201    | 69    | shortestDistance |
| chr9 | 83616217 | 83617400 | 1184 | -1.19 | 0.000379 | 0.00332  | ENSMUSG00000003226Sh3bgr12    | protein_codi | 83548327 | 83638801 | inside       | 68481  | 21401 | shortestDistance |
| chr9 | 83805492 | 83806806 | 1315 | -1.04 | 0.000647 | 0.00506  | ENSMUSG00000003226Elov4       | protein_codi | 83778692 | 83806277 | overlapStart | 128    | 529   | shortestDistance |
| chr9 | 83807625 | 83807900 | 276  | -0.89 | 0.00971  | 0.0415   | ENSMUSG00000003226Elov4       | protein_codi | 83778692 | 83806277 | upstream     | -1485  | 1348  | shortestDistance |
| chr9 | 83956619 | 83957335 | 717  | -1.01 | 0.0027   | 0.0155   | ENSMUSG00000003226Bckdhh      | protein_codi | 83925145 | 84124240 | inside       | 31832  | 31474 | shortestDistance |
| chr9 | 84030669 | 84031353 | 685  | -1.78 | 3.92E-06 | 7.45E-05 | ENSMUSG00000003226Bckdhh      | protein_codi | 83925145 | 84124240 | inside       | 105866 | 92887 | shortestDistance |
| chr9 | 84213957 | 84214256 | 300  | -1.4  | 0.00215  | 0.013    | ENSMUSG00000007766Gm26146     | snRNA        | 84188355 | 84188539 | downstream   | 25751  | 25418 | shortestDistance |
| chr9 | 84253143 | 84253715 | 573  | -0.93 | 0.00653  | 0.0306   | ENSMUSG00000007766Gm26146     | snRNA        | 84188355 | 84188539 | downstream   | 65074  | 64604 | shortestDistance |
| chr9 | 84323057 | 84323693 | 637  | -2.27 | 2.03E-08 | 8.60E-07 | ENSMUSG00000011161Gm18487     | processed_p  | 84385307 | 84386555 | downstream   | 63180  | 61614 | shortestDistance |
| chr9 | 84369316 | 84369648 | 333  | -1.29 | 0.000942 | 0.0068   | ENSMUSG00000011161Gm18487     | processed_p  | 84385307 | 84386555 | downstream   | 17073  | 15659 | shortestDistance |
| chr9 | 84499468 | 84500024 | 557  | 2.37  | 2.52E-09 | 1.42E-07 | ENSMUSG00000009992Gm8226      | processed_p  | 84423984 | 84424781 | downstream   | 75762  | 74687 | shortestDistance |
| chr9 | 84775116 | 84775636 | 521  | -0.85 | 0.0102   | 0.043    | ENSMUSG000000099724930554C24H | lincRNA      | 84774398 | 84857691 | inside       | 978    | 718   | shortestDistance |
| chr9 | 85119976 | 85120456 | 481  | -1.2  | 0.000383 | 0.00335  | ENSMUSG00000010167Gm28070     | processed_p  | 85104765 | 85105209 | downstream   | 15451  | 14767 | shortestDistance |
| chr9 | 85271922 | 85272154 | 233  | 1.65  | 0.00354  | 0.0191   | ENSMUSG00000011182AC156801.2  | lincRNA      | 85238908 | 85240041 | upstream     | -31997 | 31881 | shortestDistance |
| chr9 | 85316224 | 85316481 | 258  | -1.52 | 0.0012   | 0.00826  | ENSMUSG00000007943Gm11114     | protein_codi | 85312773 | 85312860 | downstream   | 3579   | 3364  | shortestDistance |
| chr9 | 85379489 | 85375548 | 560  | 1.78  | 7.53E-06 | 0.00013  | ENSMUSG00000011184AC159809.2  | lincRNA      | 85332352 | 85348065 | upstream     | -27203 | 26924 | shortestDistance |
| chr9 | 85410553 | 85411323 | 771  | -0.85 | 0.0105   | 0.044    | ENSMUSG00000011166AC159809.1  | lincRNA      | 85418035 | 85419158 | downstream   | 8220   | 6712  | shortestDistance |
| chr9 | 85413878 | 85414280 | 403  | -1.06 | 0.00174  | 0.011    | ENSMUSG00000011166AC159809.1  | lincRNA      | 85418035 | 85419158 | downstream   | 5079   | 3755  | shortestDistance |
| chr9 | 85480468 | 85481050 | 583  | 2.31  | 8.36E-08 | 2.87E-06 | ENSMUSG00000006527Gm25125     | snRNA        | 85472734 | 85472869 | downstream   | 8025   | 7599  | shortestDistance |
| chr9 | 85496497 | 85497353 | 857  | 2.93  | 4.20E-14 | 1.33E-11 | ENSMUSG00000011095AC158518.1  | lincRNA      | 85519493 | 85553765 | downstream   | 56840  | 22140 | shortestDistance |
| chr9 | 85538804 | 85539274 | 771  | -1.38 | 0.00205  | 0.0125   | ENSMUSG00000011095AC158518.1  | lincRNA      | 85519493 | 85553765 | inside       | 14876  | 14491 | shortestDistance |
| chr9 | 85597010 | 85597308 | 299  | -1.06 | 0.00487  | 0.0244   | ENSMUSG00000011138AC155934.1  | lincRNA      | 85637289 | 85639567 | downstream   | 42408  | 39981 | shortestDistance |
| chr9 | 85799360 | 85799587 | 228  | -1.4  | 0.00641  | 0.0302   | ENSMUSG00000010081Gm18766     | processed_p  | 85789764 | 85790571 | upstream     | -8908  | 8789  | shortestDistance |
| chr9 | 86301257 | 86301969 | 713  | -1.13 | 0.00263  | 0.0152   | ENSMUSG00000003241Ube2cbp     | protein_codi | 86307306 | 86464950 | downstream   | 163337 | 5337  | shortestDistance |
| chr9 | 86308552 | 86309085 | 534  | 2.33  | 0.00477  | 1.44E-05 | ENSMUSG00000003241Ube2cbp     | protein_codi | 86307306 | 86464950 | inside       | 156132 | 1246  | shortestDistance |
| chr9 | 86355869 | 86356212 | 344  | 4.41  | 3.06E-13 | 7.01E-11 | ENSMUSG00000003241Ube2cbp     | protein_codi | 86307306 | 86464950 | inside       | 108910 | 48563 | shortestDistance |
| chr9 | 86360433 | 86361180 | 748  | -1.81 | 1.06E-07 | 3.49E-06 | ENSMUSG00000003241Ube2cbp     | protein_codi | 86307306 | 86464950 | inside       | 104144 | 53127 | shortestDistance |
| chr9 | 86372815 | 86373518 | 704  | 1.41  | 0.000126 | 0.00135  | ENSMUSG00000003241Ube2cbp     | protein_codi | 86307306 | 86464950 | inside       | 91784  | 65509 | shortestDistance |
| chr9 | 86485762 | 86486250 | 489  | -1.21 | 0.00261  | 0.0151   | ENSMUSG00000003497Dopey1      | protein_codi | 86467154 | 86555923 | inside       | 18852  | 18608 | shortestDistance |
| chr9 | 86631139 | 86631508 | 370  | -0.9  | 0.00679  | 0.0316   | ENSMUSG00000003241Me1         | protein_codi | 86581371 | 86695953 | inside       | 64629  | 49768 | shortestDistance |
| chr9 | 86645616 | 86646068 | 453  | -1.18 | 0.00411  | 0.0214   | ENSMUSG00000003241Me1         | protein_codi | 86581371 | 86695953 | inside       | 50111  | 49885 | shortestDistance |
| chr9 | 86746245 | 86746586 | 342  | -0.96 | 0.00315  | 0.0174   | ENSMUSG00000003349Prr35       | protein_codi | 86743649 | 86758443 | inside       | 2767   | 2596  | shortestDistance |
| chr9 | 86981369 | 86981916 | 548  | -1.07 | 0.00295  | 0.0166   | ENSMUSG00000003241Gm36539     | lincRNA      | 86981991 | 87006163 | downstream   | 24521  | 75    | shortestDistance |
| chr9 | 87098307 | 87098432 | 396  | -1.4  | 0.000151 | 0.00156  | ENSMUSG00000003287Cyb5f4      | protein_codi | 87022014 | 87077774 | downstream   | 76220  | 20263 | shortestDistance |
| chr9 | 87143995 | 87145031 | 1037 | -0.98 | 0.00451  | 0.023    | ENSMUSG00000004276Mrp2        | protein_codi | 87144306 | 87184045 | overlapStart | 207    | 311   | shortestDistance |
| chr9 | 87210752 | 87211474 | 723  | -1.68 | 3.44E-05 | 0.000464 | ENSMUSG00000005691Cep162      | protein_codi | 87189577 | 87255536 | inside       | 44423  | 21175 | shortestDistance |
| chr9 | 87248179 | 87248476 | 298  | -0.88 | 0.0119   | 0.0484   | ENSMUSG00000005691Cep162      | protein_codi | 87189577 | 87255536 | inside       | 7208   | 7060  | shortestDistance |
| chr9 | 87406443 | 87406931 | 489  | -2.09 | 1.94E-05 | 0.000287 | ENSMUSG00000009938Gm9540      | processed_p  | 87394250 | 87394727 | downstream   | 12437  | 11716 | shortestDistance |
| chr9 | 87425218 | 87425533 | 316  | -0.94 | 0.0112   | 0.0464   | ENSMUSG00000009938Gm9540      | processed_p  | 87394250 | 87394727 | downstream   | 31126  | 30491 | shortestDistance |
| chr9 | 87625706 | 87626039 | 334  | -1.67 | 0.00128  | 0.00869  | ENSMUSG00000003241Tb18        | protein_codi | 87702800 | 87731260 | downstream   | 105388 | 76761 | shortestDistance |
| chr9 | 87627815 | 87628108 | 294  | -2.65 | 5.29E-08 | 1.94E-06 | ENSMUSG00000003241Tb18        | protein_codi | 87702800 | 87731260 | downstream   | 103298 | 74692 | shortestDistance |
| chr9 | 87729694 | 87730978 | 1285 | -0.99 | 0.0026   | 0.0151   | ENSMUSG00000003241Tb18        | protein_codi | 87702800 | 87731260 | inside       | 924    | 282   | shortestDistance |
| chr9 | 87731211 | 87731555 | 337  | -0.93 | 0.00627  | 0.0296   | ENSMUSG00000003241Tb18        | protein_codi | 87702800 | 87731260 | overlapStart | -127   | 41    | shortestDistance |
| chr9 | 87740220 | 87741044 | 825  | -1.16 | 0.000736 | 0.0056   | ENSMUSG00000010268Gm37374     | TEC          | 87738192 | 87740020 | upstream     | -612   | 200   | shortestDistance |
| chr9 | 88241360 | 88242091 | 732  | -0.88 | 0.00357  | 0.0192   | ENSMUSG00000010078Gm28231     | lincRNA      | 88259895 | 88263035 | upstream     | -18169 | 17804 | shortestDistance |
| chr9 | 88259408 | 88259937 | 530  | -1.73 | 6.69E-05 | 0.000804 | ENSMUSG00000010078Gm28231     | lincRNA      | 88259895 | 88263035 | overlapStart | -223   | 42    | shortestDistance |
| chr9 | 88273234 | 88273832 | 599  | 0.87  | 0.0103   | 0.0433   | ENSMUSG00000010033Gm5066      | processed_p  | 88280369 | 88281190 | downstream   | 7657   | 6537  | shortestDistance |
| chr9 | 88289828 | 88290334 | 507  | 1.27  | 0.00428  | 0.0221   | ENSMUSG00000011179AC116713.1  | processed_p  | 88286724 | 88287153 | downstream   | 3357   | 2675  | shortestDistance |
| chr9 | 88292783 | 88293149 | 367  | 1.23  | 0.00476  | 0.024    | ENSMUSG00000011179AC116713.1  | processed_p  | 88286724 | 88287153 | downstream   | 6242   | 5630  | shortestDistance |
| chr9 | 88307014 | 88307421 | 408  | 2.52  | 4.80E-05 | 0.000611 | ENSMUSG00000003242Nt5e        | protein_codi | 88327197 | 88372092 | downstream   | -19979 | 19776 | shortestDistance |
| chr9 | 88348469 | 88349017 | 549  | 0.88  | 0.0118   | 0.0479   | ENSMUSG00000003242Nt5e        | protein_codi | 88327197 | 88372092 | inside       | 21546  | 21272 | shortestDistance |
| chr9 | 88357112 | 88357637 | 526  | 1.33  | 0.000389 | 0.00339  | ENSMUSG00000003242Nt5e        | protein_codi | 88327197 | 88372092 | inside       | 30177  | 14455 | shortestDistance |
| chr9 | 88576205 | 88576601 | 397  | 1.24  | 0.00214  | 0.013    | ENSMUSG00000009069Trim43a     | protein_codi | 88580891 | 88588819 | upstream     | -4488  | 4290  | shortestDistance |
| chr9 | 88953096 | 88953600 | 505  | 1.56  | 0.000454 | 0.00383  | ENSMUSG00000010203Bcl2a1a     | protein_codi | 88956900 | 88962419 | upstream     | -3552  | 3300  | shortestDistance |
| chr9 | 89282337 | 89282949 | 613  | 3.66  | 1.46E-16 | 1.44E-13 | ENSMUSG00000006644Mthfs       | protein_codi | 89210676 | 89377713 | inside       | 71967  | 71661 | shortestDistance |
| chr9 | 89402990 | 89403464 | 475  | -1.98 | 8.80E-06 | 0.000148 | ENSMUSG00000006644Mthfs       | protein_codi | 89210676 | 89377713 | downstream   | 192551 | 25277 | shortestDistance |
| chr9 | 89625268 | 89623562 | 995  | -1.11 | 0.000302 | 0.00276  | ENSMUSG00000003931AF529169    | protein_codi | 89587216 | 89623125 | overlapStart | 60     | 437   | shortestDistance |
| chr9 | 89653093 | 89651339 | 407  | 2.83  | 1.82E-06 | 3.90E-05 | ENSMUSG00000011127AC121793.1  | lincRNA      | 89638072 | 89646002 | downstream   | 13064  | 4931  | shortestDistance |
| chr9 | 89669965 | 89670254 | 290  | -1.08 | 0.0026   | 0.015    | ENSMUSG00000011156T025665.1   | processed_p  | 89667273 | 89668471 | upstream     | -1639  | 1494  | shortestDistance |
| chr9 | 89687508 | 89687979 | 472  | -1.21 | 0.000323 | 0.00291  | ENSMUSG00000003235Tmed3       | protein_codi | 89699206 | 89705068 |              |        |       |                  |

|      |          |          |      |       |          |          |                   |            |              |          |          |              |        |        |                  |
|------|----------|----------|------|-------|----------|----------|-------------------|------------|--------------|----------|----------|--------------|--------|--------|------------------|
| chr9 | 91384073 | 91384589 | 517  | -1.2  | 0.000514 | 0.00422  | ENSMUSG0000003697 | Zic4       | protein_codi | 91362413 | 91389348 | inside       | 21918  | 4759   | shortestDistance |
| chr9 | 91586633 | 91586987 | 355  | 2.87  | 2.51E-10 | 2.00E-08 | ENSMUSG0000010034 | Gm29478    | lincRNA      | 91404474 | 91562818 | downstream   | 182336 | 23815  | shortestDistance |
| chr9 | 91587878 | 91588197 | 320  | 2.93  | 5.33E-09 | 2.70E-07 | ENSMUSG0000010034 | Gm29478    | lincRNA      | 91404474 | 91562818 | downstream   | 183564 | 25060  | shortestDistance |
| chr9 | 91610444 | 91610751 | 308  | -1.6  | 0.00188  | 0.0117   | ENSMUSG0000010034 | Gm29478    | lincRNA      | 91404474 | 91562818 | downstream   | 206124 | 47626  | shortestDistance |
| chr9 | 91981348 | 91982683 | 1246 | 1.69  | 1.82E-07 | 5.55E-06 | ENSMUSG0000010989 | Gm31409    | lincRNA      | 91922664 | 91961118 | upstream     | -20942 | 20320  | shortestDistance |
| chr9 | 91987998 | 91988967 | 970  | -1.09 | 0.000375 | 0.00329  | ENSMUSG0000010989 | Gm31409    | lincRNA      | 91922664 | 91961118 | upstream     | -27364 | 26880  | shortestDistance |
| chr9 | 92045429 | 92045673 | 245  | -1.51 | 0.000149 | 0.00155  | ENSMUSG0000010989 | Gm31409    | lincRNA      | 91922664 | 91961118 | upstream     | -84433 | 84311  | shortestDistance |
| chr9 | 92130458 | 92130962 | 505  | -1.47 | 5.27E-05 | 0.00066  | ENSMUSG0000009565 | Piscr5     | protein_codi | 92192936 | 92209772 | upstream     | -62226 | 61974  | shortestDistance |
| chr9 | 92207351 | 92207730 | 380  | -1.01 | 0.00345  | 0.0187   | ENSMUSG0000009565 | Piscr5     | protein_codi | 92192936 | 92209772 | inside       | 14604  | 2042   | shortestDistance |
| chr9 | 92222013 | 92222363 | 351  | 2.87  | 3.42E-11 | 3.74E-09 | ENSMUSG0000009565 | Piscr5     | protein_codi | 92192936 | 92209772 | downstream   | 29252  | 12241  | shortestDistance |
| chr9 | 92269830 | 92270445 | 616  | 1.25  | 8.66E-05 | 0.000987 | ENSMUSG0000003236 | Piscr1     | protein_codi | 92249750 | 92272278 | inside       | 20388  | 1833   | shortestDistance |
| chr9 | 92300939 | 92301558 | 620  | -1.12 | 0.00264  | 0.0152   | ENSMUSG0000010137 | Gm29139    | lincRNA      | 92301963 | 92305144 | downstream   | 3896   | 405    | shortestDistance |
| chr9 | 92368904 | 92369436 | 533  | 1.41  | 0.000615 | 0.00487  | ENSMUSG0000007413 | 1700057G04 | protein_codi | 92309377 | 92357876 | downstream   | 59793  | 11028  | shortestDistance |
| chr9 | 92457241 | 92458377 | 1137 | -0.96 | 0.00116  | 0.00804  | ENSMUSG0000003237 | Piscr4     | protein_codi | 92457373 | 92492456 | overlapStart | 436    | 132    | shortestDistance |
| chr9 | 92541834 | 92543110 | 1277 | -0.91 | 0.00356  | 0.0191   | ENSMUSG0000010362 | Gm38391    | TEC          | 92538801 | 92542869 | overlapStart | 397    | 241    | shortestDistance |
| chr9 | 92610905 | 92611221 | 307  | -0.93 | 0.00891  | 0.0388   | ENSMUSG0000010135 | Gm2495     | processed_p  | 92612512 | 92612977 | downstream   | 1919   | 1301   | shortestDistance |
| chr9 | 92641577 | 92642262 | 506  | -1.83 | 8.88E-07 | 2.13E-05 | ENSMUSG0000010135 | Gm2495     | processed_p  | 92612512 | 92612977 | upstream     | -29033 | 28780  | shortestDistance |
| chr9 | 93389286 | 93389574 | 289  | -1.58 | 0.000599 | 0.00476  | ENSMUSG0000009817 | Gm9621     | processed_p  | 93391368 | 93392370 | downstream   | 2940   | 1794   | shortestDistance |
| chr9 | 94053288 | 94053537 | 250  | -1.82 | 5.29E-05 | 0.000662 | ENSMUSG0000011135 | Gm5369     | processed_p  | 94139462 | 94140049 | upstream     | -86050 | 85925  | shortestDistance |
| chr9 | 94136308 | 94136845 | 538  | -1.52 | 6.69E-05 | 0.000804 | ENSMUSG0000011135 | Gm5369     | processed_p  | 94139462 | 94140049 | upstream     | -2886  | 26016  | shortestDistance |
| chr9 | 94146764 | 94147186 | 423  | -1.2  | 0.00103  | 0.00731  | ENSMUSG0000011135 | Gm5369     | processed_p  | 94139462 | 94140049 | downstream   | 7513   | 6715   | shortestDistance |
| chr9 | 94512771 | 94513184 | 414  | 1.8   | 1.30E-05 | 0.000205 | ENSMUSG0000000451 | 1190002N15 | protein_codi | 94517864 | 94538081 | downstream   | 25103  | 4680   | shortestDistance |
| chr9 | 94647027 | 94647357 | 331  | -1.05 | 0.00658  | 0.0308   | ENSMUSG0000000895 | Gm24178    | snRNA        | 94644019 | 94644114 | downstream   | 3173   | 2913   | shortestDistance |
| chr9 | 94869441 | 94869761 | 321  | -1.08 | 0.00918  | 0.0398   | ENSMUSG0000003112 | Sc9a9      | protein_codi | 94669909 | 95230445 | inside       | 199692 | 199532 | shortestDistance |
| chr9 | 94895259 | 94896321 | 397  | -1.45 | 8.05E-05 | 0.000931 | ENSMUSG0000003112 | Sc9a9      | protein_codi | 94669909 | 95230445 | inside       | 226214 | 226016 | shortestDistance |
| chr9 | 94947261 | 94947655 | 395  | 0.98  | 0.00615  | 0.0292   | ENSMUSG0000003112 | Sc9a9      | protein_codi | 94669909 | 95230445 | inside       | 277549 | 277352 | shortestDistance |
| chr9 | 94955053 | 94956091 | 589  | -0.83 | 0.0122   | 0.0492   | ENSMUSG0000003112 | Sc9a9      | protein_codi | 94669909 | 95230445 | inside       | 285888 | 274354 | shortestDistance |
| chr9 | 95053008 | 95053542 | 535  | -1.68 | 1.43E-05 | 0.000223 | ENSMUSG0000003112 | Sc9a9      | protein_codi | 94669909 | 95230445 | inside       | 383366 | 176903 | shortestDistance |
| chr9 | 95331190 | 95331632 | 443  | -1.65 | 1.37E-05 | 0.000215 | ENSMUSG0000003335 | Chst2      | protein_codi | 95399292 | 95406722 | downstream   | 75311  | 67660  | shortestDistance |
| chr9 | 95363693 | 95364090 | 398  | -1.09 | 0.00384  | 0.0203   | ENSMUSG0000003335 | Chst2      | protein_codi | 95399292 | 95406722 | downstream   | 42830  | 35202  | shortestDistance |
| chr9 | 95406617 | 95408051 | 1435 | -0.92 | 0.00253  | 0.0148   | ENSMUSG0000010375 | Gm37805    | TEC          | 95407461 | 95408554 | overlapStart | -127   | 503    | shortestDistance |
| chr9 | 95451900 | 95452226 | 327  | -1.56 | 9.52E-05 | 0.00107  | ENSMUSG0000003240 | U2surp     | protein_codi | 95456898 | 95511996 | downstream   | 59933  | 4672   | shortestDistance |
| chr9 | 95490005 | 95490357 | 353  | 4.95  | 3.28E-12 | 5.06E-10 | ENSMUSG0000003240 | U2surp     | protein_codi | 95456898 | 95511996 | inside       | 21815  | 21639  | shortestDistance |
| chr9 | 95540066 | 95540864 | 799  | 1.11  | 0.000642 | 0.00503  | ENSMUSG0000011082 | Gm32281    | lincRNA      | 95554497 | 95558913 | upstream     | -14032 | 13633  | shortestDistance |
| chr9 | 95554570 | 95555242 | 673  | -1.18 | 0.00168  | 0.0108   | ENSMUSG0000011082 | Gm32281    | lincRNA      | 95554497 | 95558913 | inside       | 409    | 73     | shortestDistance |
| chr9 | 96143632 | 96144060 | 429  | 3.5   | 2.18E-11 | 2.55E-09 | ENSMUSG0000004144 | Gk5        | protein_codi | 96119362 | 96184608 | inside       | 24484  | 24270  | shortestDistance |
| chr9 | 96391862 | 96392386 | 525  | 2.17  | 1.09E-07 | 3.57E-06 | ENSMUSG0000003241 | Atp1b3     | protein_codi | 96332655 | 96364442 | upstream     | -27682 | 27420  | shortestDistance |
| chr9 | 96393146 | 96393487 | 342  | 2.04  | 8.39E-08 | 2.88E-06 | ENSMUSG0000003241 | Atp1b3     | protein_codi | 96332655 | 96364442 | upstream     | -28874 | 28704  | shortestDistance |
| chr9 | 96399312 | 96399908 | 597  | 1.18  | 0.000375 | 0.00329  | ENSMUSG0000003241 | Atp1b3     | protein_codi | 96332655 | 96364442 | upstream     | -35168 | 34870  | shortestDistance |
| chr9 | 96536200 | 96536674 | 475  | 1.33  | 0.00911  | 0.0395   | ENSMUSG0000010161 | Gm8495     | processed_p  | 96537161 | 96537854 | upstream     | -724   | 487    | shortestDistance |
| chr9 | 96611858 | 96612741 | 884  | 0.97  | 0.00798  | 0.0358   | ENSMUSG0000003241 | Rasa2      | protein_codi | 96539300 | 96631617 | upstream     | 19317  | 18876  | shortestDistance |
| chr9 | 96636486 | 96636821 | 336  | 1.32  | 0.000463 | 0.00389  | ENSMUSG0000003241 | Rasa2      | protein_codi | 96539300 | 96631617 | upstream     | -5037  | 4869   | shortestDistance |
| chr9 | 96637202 | 96637550 | 349  | 1.87  | 1.31E-06 | 2.94E-05 | ENSMUSG0000003241 | Rasa2      | protein_codi | 96539300 | 96631617 | upstream     | -5759  | 5585   | shortestDistance |
| chr9 | 96643983 | 96644613 | 631  | 2.49  | 3.51E-08 | 1.37E-06 | ENSMUSG0000003241 | Rasa2      | protein_codi | 96539300 | 96631617 | upstream     | -12681 | 12366  | shortestDistance |
| chr9 | 96644762 | 96645165 | 404  | 2.37  | 2.23E-08 | 9.32E-07 | ENSMUSG0000003241 | Rasa2      | protein_codi | 96539300 | 96631617 | upstream     | -13347 | 13145  | shortestDistance |
| chr9 | 96650798 | 96651230 | 433  | 1.32  | 0.000166 | 0.00169  | ENSMUSG0000003241 | Rasa2      | protein_codi | 96539300 | 96631617 | upstream     | -19397 | 19181  | shortestDistance |
| chr9 | 96701905 | 96702368 | 464  | 1.88  | 2.69E-05 | 0.000378 | ENSMUSG0000004043 | Zbtb38     | protein_codi | 96682770 | 96752831 | inside       | 50695  | 19135  | shortestDistance |
| chr9 | 96873134 | 96873625 | 492  | 1.53  | 0.00477  | 0.024    | ENSMUSG0000004358 | Pxylp1     | protein_codi | 96823336 | 96892669 | inside       | 19289  | 19044  | shortestDistance |
| chr9 | 96875642 | 96876031 | 390  | 1.19  | 0.00617  | 0.0293   | ENSMUSG0000004358 | Pxylp1     | protein_codi | 96823336 | 96892669 | inside       | 16833  | 16638  | shortestDistance |
| chr9 | 96905071 | 96905356 | 286  | 3.32  | 7.71E-10 | 5.21E-08 | ENSMUSG0000010126 | Gm8524     | processed_p  | 96905507 | 96905885 | upstream     | -293   | 151    | shortestDistance |
| chr9 | 96935552 | 96936288 | 737  | 1.04  | 0.00219  | 0.0132   | ENSMUSG0000004695 | Pspb4      | protein_codi | 96943482 | 97018843 | downstream   | 82923  | 7194   | shortestDistance |
| chr9 | 96959505 | 96959842 | 338  | 2.19  | 7.48E-06 | 0.000129 | ENSMUSG0000004695 | Pspb4      | protein_codi | 96943482 | 97018843 | inside       | 59169  | 16023  | shortestDistance |
| chr9 | 97297542 | 97298059 | 518  | -1.01 | 0.00551  | 0.0269   | ENSMUSG0000010416 | A030012G06 | TEC          | 97289186 | 97291065 | downstream   | 8614   | 6477   | shortestDistance |
| chr9 | 97310374 | 97310713 | 340  | -1.39 | 0.000654 | 0.00511  | ENSMUSG0000010416 | A030012G06 | TEC          | 97289186 | 97291065 | downstream   | 21358  | 19309  | shortestDistance |
| chr9 | 97322734 | 97323196 | 463  | -0.9  | 0.0121   | 0.0492   | ENSMUSG0000003245 | Trim42     | protein_codi | 97349562 | 97369958 | downstream   | 46993  | 26366  | shortestDistance |
| chr9 | 97822884 | 97823107 | 224  | -1.17 | 0.00467  | 0.0236   | ENSMUSG0000003245 | C12n2      | protein_codi | 97444395 | 98033181 | inside       | 210185 | 210074 | shortestDistance |
| chr9 | 98361059 | 98361449 | 391  | -1.83 | 5.71E-06 | 0.000103 | ENSMUSG0000003245 | Nmna13     | protein_codi | 98287435 | 98420438 | inside       | 73819  | 58989  | shortestDistance |
| chr9 | 98480147 | 98480733 | 587  | 3.77  | 1.32E-15 | 7.73E-13 | ENSMUSG0000003245 | Rbp2       | protein_codi | 98486115 | 98509781 | upstream     | -5675  | 5382   | shortestDistance |
| chr9 | 98497139 | 98497474 | 336  | -1.79 | 1.34E-05 | 0.000211 | ENSMUSG0000003245 | Rbp2       | protein_codi | 98486115 | 98509781 | inside       | 11191  | 11024  | shortestDistance |
| chr9 | 98952158 | 98952486 | 329  | -1.02 | 0.00419  | 0.0217   | ENSMUSG0000009077 | Foxl2os    | processed_tr | 98949781 | 98955299 | inside       | 2977   | 2377   | shortestDistance |
| chr9 | 98965168 | 98965523 | 356  | -0.95 | 0.00615  | 0.0292   | ENSMUSG0000005039 | Foxl2      | protein_codi | 98955288 | 98958543 | downstream   | 10058  | 6625   | shortestDistance |
| chr9 | 99182046 | 99182724 | 679  | 1.02  | 0.000721 | 0.00551  | ENSMUSG0000010149 | Gm2950     | processed_p  | 99220048 | 99220567 | downstream   | 38182  | 37324  | shortestDistance |
| chr9 | 99183190 | 99183704 | 515  | 1.11  | 0.00133  | 0.00896  | ENSMUSG0000010149 | Gm2950     | processed_p  | 99220048 | 99220567 | downstream   | 37120  | 36344  | shortestDistance |
| chr9 | 99212658 | 99213021 | 364  | 1.37  | 0.00085  | 0.00627  | ENSMUSG0000010149 | Gm2950     | processed_p  | 99220048 | 99220567 | downstream   | 7727   | 7027   | shortestDistance |
| chr9 | 99218303 | 99218739 | 437  | 1.02  | 0.00392  | 0.0206   | ENSMUSG0000010149 | Gm2950     | processed_p  | 99220048 | 99220567 | downstream   | 2046   | 1309   | shortestDistance |
| chr9 | 99405474 | 99405740 | 267  | 1.93  | 0.00047  | 0.00393  | ENSMUSG0000003247 | Mras       | protein_codi | 99385420 | 99437381 | inside       | 31774  | 20054  | shortestDistance |
| chr9 | 99423018 | 99424363 | 1346 | 1.55  | 2.63E-06 | 5.32E-05 | ENSMUSG0000003247 | Mras       | protein_codi | 99385420 | 99437381 | inside       | 13691  | 13018  | shortestDistance |
| chr9 | 99469039 | 99469408 | 370  | 1.94  | 4.51E-05 | 0.000581 | ENSMUSG0000004624 | Nme9       | protein_codi | 99451475 | 99474751 | inside       | 17749  | 5343   | shortestDistance |
| chr9 | 99593903 | 99595541 | 239  | 1.7   | 0.000746 | 0.00565  | ENSMUSG0000003246 | Armch8     | protein_codi | 99478372 | 99568899 | inside       | 9477   | 9358   | shortestDistance |
| chr9 | 99563675 | 99564055 | 381  | 1.15  | 0.00069  | 0.00533  | ENSMUSG0000003246 | Armch8     | protein_codi | 99478372 | 99568899 | inside       | 5034   | 4844   | shortestDistance |
| chr9 | 99792710 | 99793076 | 367  | -1.61 | 0.000141 | 0.       |                   |            |              |          |          |              |        |        |                  |

|      |           |           |      |       |          |          |                              |              |           |           |              |        |        |                  |
|------|-----------|-----------|------|-------|----------|----------|------------------------------|--------------|-----------|-----------|--------------|--------|--------|------------------|
| chr9 | 106261070 | 106261616 | 547  | 1.49  | 0.000393 | 0.00342  | ENSMUSG00000097594930500F10f | antisense_RI | 106247960 | 106249413 | downstream   | 13383  | 11657  | shortestDistance |
| chr9 | 106308590 | 106308983 | 394  | 0.98  | 0.0109   | 0.0452   | ENSMUSG0000002334Poc1a       | protein_codi | 106281061 | 106350521 | inside       | 27725  | 27529  | shortestDistance |
| chr9 | 106821607 | 106822115 | 509  | 0.81  | 0.0103   | 0.0433   | ENSMUSG0000004032Dca1f       | protein_codi | 106821874 | 106880992 | overlapStart | -13    | 241    | shortestDistance |
| chr9 | 107263885 | 107264327 | 443  | 1.05  | 0.00715  | 0.0328   | ENSMUSG0000003257Mapkapk3    | protein_codi | 107254927 | 107289877 | inside       | 25771  | 8958   | shortestDistance |
| chr9 | 107279854 | 107281148 | 1295 | 1.26  | 0.000824 | 0.00613  | ENSMUSG0000003257Mapkapk3    | protein_codi | 107254927 | 107289877 | inside       | 9376   | 8729   | shortestDistance |
| chr9 | 107587281 | 107588223 | 943  | 0.8   | 0.011    | 0.0455   | ENSMUSG0000001004Ifrrd2      | protein_codi | 107587642 | 107593385 | overlapStart | 110    | 361    | shortestDistance |
| chr9 | 107602066 | 107602528 | 463  | 1.11  | 0.00507  | 0.0252   | ENSMUSG0000005796Sema3b      | protein_codi | 107597674 | 107609229 | inside       | 6932   | 4392   | shortestDistance |
| chr9 | 107624668 | 107624882 | 215  | 1.07  | 0.0105   | 0.0439   | ENSMUSG0000003256Gna12       | protein_codi | 107614125 | 107635367 | inside       | 10592  | 10485  | shortestDistance |
| chr9 | 107644554 | 107644930 | 377  | 0.91  | 0.00576  | 0.0278   | ENSMUSG0000001006Slc38a3     | protein_codi | 107650634 | 107669530 | downstream   | 24788  | 5704   | shortestDistance |
| chr9 | 107678170 | 107678448 | 279  | 1.18  | 0.00929  | 0.0401   | ENSMUSG0000003483Gna11       | protein_codi | 107674474 | 107679712 | inside       | 1403   | 1264   | shortestDistance |
| chr9 | 107724785 | 107725127 | 343  | 2.27  | 4.73E-06 | 8.77E-05 | ENSMUSG0000003468Sema3f      | protein_codi | 107681500 | 107710475 | upstream     | -14481 | 14310  | shortestDistance |
| chr9 | 107923079 | 107923376 | 298  | 1.44  | 0.000639 | 0.00501  | ENSMUSG0000003258Mst1r       | protein_codi | 107906873 | 107920383 | downstream   | 16355  | 2696   | shortestDistance |
| chr9 | 108190027 | 108190291 | 265  | 1.23  | 0.00378  | 0.0201   | ENSMUSG0000003258Bsn         | protein_codi | 108096022 | 108190384 | inside       | 225    | 93     | shortestDistance |
| chr9 | 108338841 | 108339617 | 777  | 0.9   | 0.00604  | 0.0288   | ENSMUSG0000006385Gpx1        | protein_codi | 108338903 | 108340343 | overlapStart | 326    | 62     | shortestDistance |
| chr9 | 108589244 | 108589547 | 304  | 1.49  | 0.0042   | 0.0218   | ENSMUSG00000011568CT57127.1  | unitary_pseu | 108587052 | 108589545 | overlapEnd   | 2344   | 2      | shortestDistance |
| chr9 | 108661824 | 108662274 | 451  | 1.03  | 0.00402  | 0.0211   | ENSMUSG0000003260Slc25a20    | protein_codi | 108662088 | 108684641 | overlapStart | -39    | 186    | shortestDistance |
| chr9 | 108759860 | 108760090 | 231  | 2.06  | 0.000103 | 0.00114  | ENSMUSG0000003260Pkrar2a     | protein_codi | 108689314 | 108750436 | downstream   | 70661  | 9424   | shortestDistance |
| chr9 | 108801075 | 108810075 | 311  | 2.16  | 4.78E-06 | 8.85E-05 | ENSMUSG0000003259Nkipsd      | protein_codi | 108808368 | 108818844 | inside       | 1552   | 1397   | shortestDistance |
| chr9 | 108825793 | 108826149 | 357  | 1     | 0.00919  | 0.0398   | ENSMUSG0000010224Gm37714     | TEC          | 108825349 | 108825690 | downstream   | 622    | 103    | shortestDistance |
| chr9 | 108826727 | 108827475 | 749  | 0.92  | 0.00575  | 0.0277   | ENSMUSG0000003247Celsr3      | protein_codi | 108826320 | 108852969 | inside       | 781    | 407    | shortestDistance |
| chr9 | 108831606 | 108832017 | 412  | 1.86  | 7.32E-06 | 0.000127 | ENSMUSG00000002347Celsr3     | protein_codi | 108826320 | 108852969 | inside       | 5492   | 5286   | shortestDistance |
| chr9 | 108832322 | 108832976 | 655  | 1.08  | 0.000959 | 0.0069   | ENSMUSG00000002347Celsr3     | protein_codi | 108826320 | 108852969 | inside       | 6329   | 6002   | shortestDistance |
| chr9 | 108925932 | 108926305 | 374  | 2.6   | 1.95E-07 | 5.91E-06 | ENSMUSG0000002565Uqgrc1      | protein_codi | 108936633 | 108949623 | upstream     | -10515 | 10328  | shortestDistance |
| chr9 | 109000710 | 109001118 | 349  | 1.43  | 0.000671 | 0.00521  | ENSMUSG0000002564PKfb4       | protein_codi | 108991778 | 109032228 | inside       | 9166   | 8992   | shortestDistance |
| chr9 | 109849402 | 109849874 | 473  | 3.37  | 2.68E-14 | 9.20E-12 | ENSMUSG0000003835Camp        | protein_codi | 109847379 | 109849617 | overlapStart | -21    | 215    | shortestDistance |
| chr9 | 109892723 | 109893027 | 305  | 1.2   | 0.00275  | 0.0157   | ENSMUSG0000003247Cdc25a      | protein_codi | 109875579 | 109893895 | inside       | 17296  | 868    | shortestDistance |
| chr9 | 109908035 | 109908557 | 523  | 1.62  | 3.17E-05 | 0.000434 | ENSMUSG0000003247Cdc25a      | protein_codi | 109875579 | 109893895 | downstream   | 32717  | 14140  | shortestDistance |
| chr9 | 109913991 | 109914840 | 850  | 1.2   | 0.000438 | 0.00372  | ENSMUSG0000010519Gm4644      | processed_g  | 109924351 | 109924750 | downstream   | 10334  | 9511   | shortestDistance |
| chr9 | 110021538 | 110021870 | 333  | 4.85  | 5.41E-11 | 5.50E-09 | ENSMUSG0000003247Map4        | protein_codi | 109931460 | 110083955 | inside       | 90244  | 62085  | shortestDistance |
| chr9 | 110281174 | 110281438 | 265  | 1.15  | 0.0111   | 0.046    | ENSMUSG0000009897Mir6236     | miRNA        | 110281287 | 110281409 | includeFeatu | 19     | 29     | shortestDistance |
| chr9 | 110452540 | 110452870 | 331  | 1.35  | 0.00197  | 0.0122   | ENSMUSG0000005479Khl18       | protein_codi | 110425926 | 110476694 | inside       | 23989  | 23824  | shortestDistance |
| chr9 | 110525725 | 110526139 | 415  | 1.38  | 0.000412 | 0.00354  | ENSMUSG0000003248Kif9        | protein_codi | 110476958 | 110525179 | downstream   | 48974  | 546    | shortestDistance |
| chr9 | 110653172 | 110654422 | 711  | 0.88  | 0.00513  | 0.0254   | ENSMUSG0000005672Nbeal2      | protein_codi | 110624789 | 110654161 | overlapStart | 94     | 261    | shortestDistance |
| chr9 | 110657661 | 110658043 | 383  | 0.94  | 0.00379  | 0.0201   | ENSMUSG0000001965Cdc12       | protein_codi | 110656503 | 110711606 | inside       | 1349   | 1158   | shortestDistance |
| chr9 | 110685640 | 110686048 | 409  | 1.13  | 0.00144  | 0.00948  | ENSMUSG0000001965Cdc12       | protein_codi | 110656503 | 110711606 | inside       | 29341  | 25558  | shortestDistance |
| chr9 | 110706769 | 110707215 | 447  | 1.17  | 0.00149  | 0.00976  | ENSMUSG0000001965Cdc12       | protein_codi | 110656503 | 110711606 | inside       | 50489  | 4391   | shortestDistance |
| chr9 | 110840976 | 110841931 | 956  | 1.46  | 7.67E-05 | 0.000896 | ENSMUSG0000004725Prrs45      | protein_codi | 110834588 | 110841313 | overlapEnd   | 6866   | 337    | shortestDistance |
| chr9 | 110951715 | 110952258 | 544  | 2.18  | 2.22E-07 | 6.57E-06 | ENSMUSG0000003249Lrrc2       | protein_codi | 110951545 | 110984066 | inside       | 4461   | 170    | shortestDistance |
| chr9 | 111033819 | 111034074 | 256  | 2.19  | 0.000241 | 0.00229  | ENSMUSG0000003249Ltf         | protein_codi | 111019271 | 111042767 | inside       | 14675  | 8693   | shortestDistance |
| chr9 | 111094613 | 111095094 | 482  | 1     | 0.00401  | 0.021    | ENSMUSG0000008829Gm26409     | snRNA        | 111075394 | 111075456 | downstream   | 19460  | 19157  | shortestDistance |
| chr9 | 111119210 | 111119472 | 263  | 1.91  | 8.40E-05 | 0.000964 | ENSMUSG0000003249Lrrfp2      | protein_codi | 111117592 | 111225668 | inside       | 1749   | 1618   | shortestDistance |
| chr9 | 111138213 | 111138505 | 293  | 1.13  | 0.0119   | 0.0485   | ENSMUSG0000003249Lrrfp2      | protein_codi | 111117592 | 111225668 | inside       | 20767  | 20621  | shortestDistance |
| chr9 | 111143387 | 111143884 | 498  | 0.85  | 0.0106   | 0.0443   | ENSMUSG0000003249Lrrfp2      | protein_codi | 111117592 | 111225668 | inside       | 26044  | 25795  | shortestDistance |
| chr9 | 111145536 | 111145890 | 355  | 1.46  | 0.000126 | 0.00135  | ENSMUSG0000003249Lrrfp2      | protein_codi | 111117592 | 111225668 | inside       | 28121  | 27944  | shortestDistance |
| chr9 | 111146147 | 111146603 | 457  | 2.59  | 1.38E-10 | 1.21E-08 | ENSMUSG0000003249Lrrfp2      | protein_codi | 111117592 | 111225668 | inside       | 28783  | 28555  | shortestDistance |
| chr9 | 111221631 | 111222045 | 415  | 2.86  | 8.04E-10 | 5.42E-08 | ENSMUSG0000003249Lrrfp2      | protein_codi | 111117592 | 111225668 | inside       | 104246 | 3623   | shortestDistance |
| chr9 | 111428989 | 111429323 | 335  | 3.29  | 1.43E-10 | 1.24E-08 | ENSMUSG0000003250Dkl3        | protein_codi | 111439081 | 111489118 | upstream     | -9925  | 9758   | shortestDistance |
| chr9 | 111429357 | 111429672 | 316  | 2.09  | 2.12E-05 | 0.00031  | ENSMUSG0000003250Dkl3        | protein_codi | 111439081 | 111489118 | upstream     | -9567  | 9409   | shortestDistance |
| chr9 | 111551500 | 111551807 | 308  | 1.38  | 0.00722  | 0.0331   | ENSMUSG0000010664Gm42523     | lincRNA      | 111544004 | 111548940 | upstream     | -2714  | 2560   | shortestDistance |
| chr9 | 111571679 | 111572126 | 448  | 1.6   | 0.000133 | 0.00142  | ENSMUSG0000003250Stac        | protein_codi | 111561437 | 111690348 | inside       | 118446 | 10242  | shortestDistance |
| chr9 | 112227147 | 112227557 | 411  | 1.06  | 0.000731 | 0.00557  | ENSMUSG0000003250Arp21       | protein_codi | 112065091 | 112235938 | inside       | 8586   | 8381   | shortestDistance |
| chr9 | 112811997 | 112812258 | 262  | -1.31 | 0.02021  | 0.0123   | ENSMUSG0000011099Gm36251     | lincRNA      | 113070983 | 113123029 | downstream   | 310901 | 258725 | shortestDistance |
| chr9 | 113645552 | 113645855 | 304  | 1.08  | 0.00829  | 0.0368   | ENSMUSG0000011136Gm36745     | lincRNA      | 113636528 | 113642054 | upstream     | -3650  | 3498   | shortestDistance |
| chr9 | 113724674 | 113725250 | 577  | 2.34  | 1.05E-07 | 3.48E-06 | ENSMUSG0000003339Clasp2      | protein_codi | 113741473 | 113919682 | upstream     | -16511 | 16223  | shortestDistance |
| chr9 | 113782667 | 113782963 | 297  | 2.38  | 1.45E-08 | 6.46E-07 | ENSMUSG0000003339Clasp2      | protein_codi | 113741473 | 113919682 | inside       | 41342  | 41194  | shortestDistance |
| chr9 | 113859457 | 113859771 | 315  | 2.96  | 8.24E-08 | 2.83E-06 | ENSMUSG0000003339Clasp2      | protein_codi | 113741473 | 113919682 | inside       | 118141 | 59911  | shortestDistance |
| chr9 | 113928608 | 113928957 | 350  | 1.19  | 0.000515 | 0.00423  | ENSMUSG0000000974Ubp1        | protein_codi | 113930934 | 113977202 | upstream     | -2152  | 1977   | shortestDistance |
| chr9 | 114018996 | 114019890 | 895  | 1.44  | 0.00022  | 0.00214  | ENSMUSG0000003250Fbxl2       | protein_codi | 113963637 | 114046191 | inside       | 26748  | 26301  | shortestDistance |
| chr9 | 114369428 | 114369705 | 278  | 0.97  | 0.00912  | 0.0396   | ENSMUSG000000740349305200M4  | processed_tr | 114368303 | 114377229 | inside       | 1263   | 1125   | shortestDistance |
| chr9 | 114418237 | 114418549 | 313  | 1.56  | 0.000904 | 0.00658  | ENSMUSG0000004559Gib1        | protein_codi | 114401076 | 114474898 | inside       | 17317  | 17161  | shortestDistance |
| chr9 | 114501110 | 114501421 | 312  | 1.61  | 6.93E-05 | 0.000827 | ENSMUSG00000004789Ccr4       | protein_codi | 114490316 | 114504916 | inside       | 3650   | 3495   | shortestDistance |
| chr9 | 114502538 | 114503413 | 876  | 2.95  | 4.10E-15 | 2.01E-12 | ENSMUSG00000004789Ccr4       | protein_codi | 114490316 | 114504916 | inside       | 1940   | 1503   | shortestDistance |
| chr9 | 114506584 | 114506872 | 289  | 1.11  | 0.00428  | 0.0221   | ENSMUSG0000007925Trim71      | protein_codi | 114507133 | 114564369 | downstream   | 57641  | 261    | shortestDistance |
| chr9 | 114541821 | 114541821 | 540  | 2.8   | 2.00E-09 | 1.16E-07 | ENSMUSG0000007925Trim71      | protein_codi | 114507133 | 114564369 | inside       | 22817  | 22548  | shortestDistance |
| chr9 | 114582230 | 114582503 | 274  | 1.31  | 0.00142  | 0.00943  | ENSMUSG0000005616Cnot10      | protein_codi | 114585878 | 114640184 | downstream   | 57818  | 3375   | shortestDistance |
| chr9 | 114613143 | 114613455 | 313  | 3.54  | 1.89E-07 | 5.74E-06 | ENSMUSG0000005616Cnot10      | protein_codi | 114585878 | 114640184 | inside       | 26885  | 26729  | shortestDistance |
| chr9 | 114672770 | 114673557 | 788  | 1.03  | 0.00452  | 0.023    | ENSMUSG0000003243Dync111     | protein_codi | 114688790 | 114724302 | upstream     | -15626 | 15233  | shortestDistance |
| chr9 | 114678607 | 114678984 | 378  | 4.21  | 1.56E-13 | 3.98E-11 | ENSMUSG0000003243Dync111     | protein_codi | 114688790 | 114724302 | upstream     | -9994  | 9806   | shortestDistance |
| chr9 | 114682068 | 114682561 | 494  | 1.21  | 0.00136  | 0.00909  | ENSMUSG0000003243Dync111     | protein_codi | 114688790 | 114724302 | upstream     | -6476  | 6229   | shortestDistance |
| chr9 | 114710394 | 114710697 | 304  | 1.94  | 0.000524 | 0.00428  | ENSMUSG0000003243Dync111     | protein_codi | 114688790 | 114724302 | inside       | 21756  | 13605  | shortestDistance |
| chr9 | 114758227 | 114758768 | 542  | 1.17  | 0.00327  | 0.018    | ENSMUSG0000003243Cmtm7       | protein_codi | 114756836 | 114781856 | inside       | 23358  | 1391   | shortestDistance |
| chr9 | 114770192 | 114770672 | 481  | 1.    |          |          |                              |              |           |           |              |        |        |                  |

|      |           |             |      |      |          |          |                   |             |               |           |           |              |         |        |                  |
|------|-----------|-------------|------|------|----------|----------|-------------------|-------------|---------------|-----------|-----------|--------------|---------|--------|------------------|
| chr9 | 116270222 | 116270773   | 552  | 1.26 | 0.0101   | 0.0429   | ENSMUSG0000011132 | Gm31410     | lincRNA       | 116218802 | 116249753 | downstream   | 51696   | 20469  | shortestDistance |
| chr9 | 116277760 | 116278090   | 331  | 3.59 | 2.47E-09 | 1.40E-07 | ENSMUSG0000011132 | Gm31410     | lincRNA       | 116218802 | 116249753 | downstream   | 51923   | 28007  | shortestDistance |
| chr9 | 116291691 | 116292203   | 513  | 3.64 | 3.85E-13 | 8.36E-11 | ENSMUSG0000011075 | D730003K21  | lincRNA       | 116327337 | 116339511 | upstream     | -35390  | 35134  | shortestDistance |
| chr9 | 116350714 | 116351126   | 413  | 1.91 | 1.09E-05 | 0.000178 | ENSMUSG0000011075 | D730003K21  | lincRNA       | 116327337 | 116339511 | downstream   | 23583   | 11203  | shortestDistance |
| chr9 | 116365976 | 116366542   | 567  | 1    | 0.00148  | 0.00972  | ENSMUSG0000011075 | D730003K21  | lincRNA       | 116327337 | 116339511 | downstream   | 38922   | 26465  | shortestDistance |
| chr9 | 116384687 | 116385101   | 415  | 1.18 | 0.00129  | 0.00872  | ENSMUSG0000011075 | D730003K21  | lincRNA       | 116327337 | 116339511 | downstream   | 57557   | 45176  | shortestDistance |
| chr9 | 116438564 | 116439075   | 512  | 4.09 | 3.22E-13 | 7.25E-11 | ENSMUSG0000011075 | D730003K21  | lincRNA       | 116327337 | 116339511 | downstream   | 111483  | 99053  | shortestDistance |
| chr9 | 116489853 | 116490110   | 258  | 1.33 | 0.00471  | 0.0238   | ENSMUSG0000003960 | Rbms3       | protein_codi  | 116572746 | 117629913 | downstream   | 1139931 | 82636  | shortestDistance |
| chr9 | 116808405 | 116808834   | 430  | 3.39 | 1.16E-09 | 7.35E-08 | ENSMUSG0000003960 | Rbms3       | protein_codi  | 116572746 | 117629913 | inside       | 821293  | 235659 | shortestDistance |
| chr9 | 116813359 | 116813814   | 456  | 2.02 | 9.30E-05 | 0.00105  | ENSMUSG0000003960 | Rbms3       | protein_codi  | 116572746 | 117629913 | inside       | 816327  | 240613 | shortestDistance |
| chr9 | 117134144 | 117134446   | 303  | 2.19 | 4.79E-07 | 1.26E-05 | ENSMUSG0000003960 | Rbms3       | protein_codi  | 116572746 | 117629913 | inside       | 495618  | 495467 | shortestDistance |
| chr9 | 117399912 | 117400879   | 968  | 1.13 | 0.00401  | 0.021    | ENSMUSG0000003960 | Rbms3       | protein_codi  | 116572746 | 117629913 | inside       | 229517  | 229034 | shortestDistance |
| chr9 | 117862788 | 117863177   | 390  | 1.49 | 0.000128 | 0.00136  | ENSMUSG0000011040 | Gm45881     | lincRNA       | 117708192 | 117872584 | inside       | 9602    | 9407   | shortestDistance |
| chr9 | 117863307 | 117863867   | 561  | 1.44 | 0.000498 | 0.00412  | ENSMUSG0000011040 | Gm45881     | lincRNA       | 117708192 | 117872584 | inside       | 8997    | 8717   | shortestDistance |
| chr9 | 117896487 | 117896855   | 369  | 1.46 | 0.000404 | 0.00349  | ENSMUSG0000003244 | Zcwpw2      | transcribed_i | 117876000 | 118040259 | inside       | 143588  | 20487  | shortestDistance |
| chr9 | 118040090 | 118041296   | 1207 | 0.97 | 0.00188  | 0.0117   | ENSMUSG0000003928 | Azi2        | protein_codi  | 118040499 | 118069794 | overlapStart | 194     | 409    | shortestDistance |
| chr9 | 118082484 | 118083405   | 922  | 0.88 | 0.00535  | 0.0263   | ENSMUSG0000003916 | Cmc1        | protein_codi  | 118064522 | 118150177 | inside       | 67233   | 17962  | shortestDistance |
| chr9 | 118149719 | 118150607   | 859  | 1.18 | 0.00171  | 0.00174  | ENSMUSG0000003916 | Cmc1        | protein_codi  | 118064522 | 118150177 | overlapStart | -1      | 428    | shortestDistance |
| chr9 | 118606489 | 118607237   | 749  | 0.94 | 0.00638  | 0.0301   | ENSMUSG0000003911 | Iltga9      | protein_codi  | 118606690 | 118901003 | overlapStart | 173     | 201    | shortestDistance |
| chr9 | 118612070 | 118612756   | 687  | 0.9  | 0.0103   | 0.0433   | ENSMUSG0000003911 | Iltga9      | protein_codi  | 118606690 | 118901003 | inside       | 5723    | 5380   | shortestDistance |
| chr9 | 118632373 | 118633228   | 856  | 1.36 | 0.000139 | 0.00147  | ENSMUSG0000003911 | Iltga9      | protein_codi  | 118606690 | 118901003 | inside       | 26110   | 25683  | shortestDistance |
| chr9 | 118659798 | 118660221   | 424  | 4.39 | 2.79E-17 | 4.05E-14 | ENSMUSG0000003911 | Iltga9      | protein_codi  | 118606690 | 118901003 | inside       | 53320   | 53108  | shortestDistance |
| chr9 | 118669729 | 118670097   | 369  | 2.81 | 1.09E-09 | 6.95E-08 | ENSMUSG0000003911 | Iltga9      | protein_codi  | 118606690 | 118901003 | inside       | 63223   | 63039  | shortestDistance |
| chr9 | 118674165 | 118674680   | 516  | 1.01 | 0.00208  | 0.0127   | ENSMUSG0000003911 | Iltga9      | protein_codi  | 118606690 | 118901003 | inside       | 67732   | 67475  | shortestDistance |
| chr9 | 118684371 | 118684714   | 344  | 1.3  | 0.00183  | 0.0115   | ENSMUSG0000003911 | Iltga9      | protein_codi  | 118606690 | 118901003 | inside       | 77852   | 77681  | shortestDistance |
| chr9 | 118686202 | 118686668   | 467  | 1.25 | 0.0109   | 0.0453   | ENSMUSG0000003911 | Iltga9      | protein_codi  | 118606690 | 118901003 | inside       | 79745   | 79512  | shortestDistance |
| chr9 | 118876749 | 118877322   | 574  | 1.44 | 0.00031  | 0.00282  | ENSMUSG0000003911 | Iltga9      | protein_codi  | 118606690 | 118901003 | inside       | 270346  | 23681  | shortestDistance |
| chr9 | 118913069 | 118913550   | 482  | 2.37 | 1.13E-08 | 5.22E-07 | ENSMUSG0000008611 | Gm2415      | antisense_RI  | 118980075 | 118926455 | inside       | 13145   | 12905  | shortestDistance |
| chr9 | 118992179 | 118992569   | 391  | 1.95 | 1.21E-05 | 0.000194 | ENSMUSG0000004740 | Ctdspl      | protein_codi  | 118926453 | 119043998 | inside       | 65921   | 51429  | shortestDistance |
| chr9 | 119000222 | 119000629   | 408  | 1.23 | 0.00546  | 0.0267   | ENSMUSG0000004740 | Ctdspl      | protein_codi  | 118926453 | 119043998 | inside       | 73973   | 43369  | shortestDistance |
| chr9 | 119002265 | 119002730   | 466  | 1.71 | 0.000364 | 0.00321  | ENSMUSG0000004740 | Ctdspl      | protein_codi  | 118926453 | 119043998 | inside       | 76045   | 41268  | shortestDistance |
| chr9 | 119087888 | 119088842   | 955  | 1.11 | 0.000366 | 0.00323  | ENSMUSG0000001066 | Picd1       | protein_codi  | 119071527 | 119093502 | inside       | 5137    | 4660   | shortestDistance |
| chr9 | 119328422 | 119329261   | 840  | 1.43 | 8.13E-05 | 0.000938 | ENSMUSG0000007028 | Slc22a14    | protein_codi  | 119169455 | 119365553 | inside       | 36711   | 36292  | shortestDistance |
| chr9 | 119334242 | 119334842   | 601  | 0.95 | 0.00337  | 0.0183   | ENSMUSG0000007028 | Slc22a14    | protein_codi  | 119169455 | 119365553 | inside       | 31011   | 30711  | shortestDistance |
| chr9 | 119357268 | 119357908   | 641  | 0.96 | 0.00368  | 0.0197   | ENSMUSG0000003576 | Xylb        | protein_codi  | 119357381 | 119393797 | overlapStart | 207     | 113    | shortestDistance |
| chr9 | 119445827 | 119446141   | 315  | 0.93 | 0.0119   | 0.0484   | ENSMUSG0000004278 | Exg         | protein_codi  | 119444904 | 119465517 | inside       | 1080    | 923    | shortestDistance |
| chr9 | 119925190 | 119925719   | 530  | 1.17 | 0.00111  | 0.00777  | ENSMUSG0000003251 | Gorasp1     | protein_codi  | 119925257 | 119937565 | overlapEnd   | 12111   | 67     | shortestDistance |
| chr9 | 119943402 | 119943985   | 584  | 1.36 | 0.000424 | 0.00363  | ENSMUSG0000003251 | Ttc12a      | protein_codi  | 119937606 | 119967793 | inside       | 6088    | 5796   | shortestDistance |
| chr9 | 119976693 | 119977255   | 563  | 0.98 | 0.00455  | 0.0232   | ENSMUSG0000003251 | Csrp1       | protein_codi  | 119971163 | 119984658 | inside       | 7684    | 5330   | shortestDistance |
| chr9 | 120043023 | 120043706   | 684  | 2.16 | 2.44E-07 | 7.14E-06 | ENSMUSG0000005233 | C3c3r1      | protein_codi  | 119901616 | 120069879 | inside       | 26515   | 26173  | shortestDistance |
| chr9 | 120049374 | 120049772   | 399  | 4.64 | 6.70E-14 | 1.98E-11 | ENSMUSG0000005233 | C3c3r1      | protein_codi  | 119901616 | 120069879 | inside       | 20306   | 20107  | shortestDistance |
| chr9 | 120054586 | 120055339   | 754  | 1.33 | 0.000172 | 0.00174  | ENSMUSG0000005233 | C3c3r1      | protein_codi  | 119901616 | 120069879 | inside       | 14917   | 14540  | shortestDistance |
| chr9 | 120058659 | 120059067   | 409  | 2.3  | 1.65E-08 | 7.20E-07 | ENSMUSG0000005233 | C3c3r1      | protein_codi  | 119901616 | 120069879 | inside       | 11016   | 10812  | shortestDistance |
| chr9 | 120068096 | 120069090   | 995  | 1.29 | 0.000223 | 0.00216  | ENSMUSG0000005233 | C3c3r1      | protein_codi  | 119901616 | 120069879 | inside       | 1286    | 789    | shortestDistance |
| chr9 | 120083181 | 120083550   | 370  | 1.9  | 6.10E-05 | 0.000746 | ENSMUSG0000005233 | C3c3r1      | protein_codi  | 120092114 | 120094906 | upstream     | -8748   | 8564   | shortestDistance |
| chr9 | 120116025 | 120116553   | 529  | 1.4  | 0.000153 | 0.00158  | ENSMUSG0000003251 | Slc25a38    | protein_codi  | 120110374 | 120124504 | inside       | 5915    | 5651   | shortestDistance |
| chr9 | 120140688 | 120140978   | 291  | 1.08 | 0.0073   | 0.0334   | ENSMUSG0000011102 | Gm5922      | lincRNA       | 120133463 | 120136329 | upstream     | -4504   | 4359   | shortestDistance |
| chr9 | 120501262 | 120501527   | 268  | 1.68 | 0.00035  | 0.00311  | ENSMUSG0000006941 | Eif1b       | protein_codi  | 120492232 | 120495330 | downstream   | 9162    | 5930   | shortestDistance |
| chr9 | 120776434 | 120777060   | 627  | 1.01 | 0.00128  | 0.00868  | ENSMUSG0000006439 | Gm23624     | misc_RNA      | 120791465 | 120791785 | downstream   | 15038   | 14405  | shortestDistance |
| chr9 | 120856310 | 120856542   | 233  | 1.4  | 0.00684  | 0.0317   | ENSMUSG0000011123 | AC118476.2  | lincRNA       | 120849207 | 120853103 | downstream   | 7219    | 3207   | shortestDistance |
| chr9 | 120927000 | 120927551   | 552  | 2.15 | 1.35E-06 | 3.01E-05 | ENSMUSG0000008636 | 4930593C16f | antisense_RI  | 120924452 | 120930804 | inside       | 3528    | 2548   | shortestDistance |
| chr9 | 120933139 | 120933872   | 734  | 1.17 | 0.00328  | 0.018    | ENSMUSG0000000693 | Ctnnb1      | protein_codi  | 120929216 | 120960507 | inside       | 4290    | 3923   | shortestDistance |
| chr9 | 121313677 | 121313918   | 242  | 1.05 | 0.00814  | 0.0363   | ENSMUSG0000003253 | Trak1       | protein_codi  | 121297502 | 121474918 | inside       | 16296   | 16175  | shortestDistance |
| chr9 | 121314630 | 121315208   | 579  | 1.03 | 0.00133  | 0.00893  | ENSMUSG0000003253 | Trak1       | protein_codi  | 121297502 | 121474918 | inside       | 17417   | 17128  | shortestDistance |
| chr9 | 121352134 | 121352700   | 567  | 1.2  | 0.000517 | 0.00424  | ENSMUSG0000003253 | Trak1       | protein_codi  | 121297502 | 121474918 | inside       | 54915   | 54632  | shortestDistance |
| chr9 | 121371399 | 121371895   | 497  | 0.95 | 0.00585  | 0.0281   | ENSMUSG0000003253 | Trak1       | protein_codi  | 121297502 | 121474918 | inside       | 74145   | 73897  | shortestDistance |
| chr9 | 121423644 | 121424047   | 404  | 2.24 | 5.67E-07 | 1.45E-05 | ENSMUSG0000003253 | Trak1       | protein_codi  | 121297502 | 121474918 | inside       | 126344  | 50871  | shortestDistance |
| chr9 | 121710042 | 121710570   | 529  | 0.79 | 0.0107   | 0.0445   | ENSMUSG0000003252 | Ns18l2      | protein_codi  | 121710329 | 121713388 | overlapStart | -23     | 241    | shortestDistance |
| chr9 | 121718262 | 121718555   | 294  | 1.28 | 0.000664 | 0.00517  | ENSMUSG0000003252 | Nktr        | protein_codi  | 121719169 | 121756843 | upstream     | -761    | 614    | shortestDistance |
| chr9 | 121718731 | 121719426   | 696  | 1    | 0.00388  | 0.0205   | ENSMUSG0000003252 | Nktr        | protein_codi  | 121719169 | 121756843 | overlapStart | -91     | 257    | shortestDistance |
| chr9 | 121904212 | 121904739   | 528  | 1.28 | 0.00132  | 0.00888  | ENSMUSG0000004453 | Ackr2       | protein_codi  | 121898355 | 121911074 | inside       | 6121    | 5857   | shortestDistance |
| chr9 | 121904989 | 121905292   | 304  | 1.34 | 0.00107  | 0.0075   | ENSMUSG0000004453 | Ackr2       | protein_codi  | 121898355 | 121911074 | inside       | 6785    | 5782   | shortestDistance |
| chr9 | 121918845 | 121919571   | 727  | 1.3  | 0.00119  | 0.00816  | ENSMUSG0000005044 | Cyp8b1      | protein_codi  | 121914356 | 121916305 | upstream     | -2903   | 2540   | shortestDistance |
| chr9 | 122109560 | 122109933   | 374  | 1.65 | 0.00158  | 0.0102   | ENSMUSG0000003814 | Snrk        | protein_codi  | 122117266 | 122169702 | upstream     | -7520   | 7333   | shortestDistance |
| chr9 | 122122156 | 122122514   | 359  | 0.91 | 0.00983  | 0.0419   | ENSMUSG0000003814 | Snrk        | protein_codi  | 122117266 | 122169702 | inside       | 5069    | 4890   | shortestDistance |
| chr9 | 122138681 | 122139060   | 380  | 2.06 | 2.12E-05 | 0.00031  | ENSMUSG0000003814 | Snrk        | protein_codi  | 122117266 | 122169702 | inside       | 21604   | 21415  | shortestDistance |
| chr9 | 122185126 | 122185375   | 250  | 1.6  | 0.000686 | 0.00531  | ENSMUSG0000003794 | Ano10       | protein_codi  | 122175874 | 122294423 | inside       | 109173  | 9252   | shortestDistance |
| chr9 | 122293788 | 122294893   | 1106 | 0.97 | 0.00183  | 0.0115   | ENSMUSG0000003794 | Ano10       | protein_codi  | 122175874 | 122294423 | overlapStart | 83      | 470    | shortestDistance |
| chr9 | 122305304 | 122305789   | 486  | 0.94 | 0.00861  | 0.0379   | ENSMUSG0000009757 | Gm26797     | lincRNA       | 122295869 | 122310928 | inside       | 5382    | 5139   | shortestDistance |
| chr9 | 122349189 | 122349619</ |      |      |          |          |                   |             |               |           |           |              |         |        |                  |

|      |          |          |      |       |          |          |                     |            |               |          |          |              |         |        |                  |
|------|----------|----------|------|-------|----------|----------|---------------------|------------|---------------|----------|----------|--------------|---------|--------|------------------|
| chrX | 6458071  | 6458423  | 353  | -1.78 | 0.000149 | 0.00155  | ENSMUSG0000006827   | Shroom4    | protein_codi  | 6399854  | 6637448  | inside       | 58393   | 58217  | shortestDistance |
| chrX | 6580747  | 6581464  | 718  | -2.54 | 4.07E-06 | 7.71E-05 | ENSMUSG0000006827   | Shroom4    | protein_codi  | 6399854  | 6637448  | inside       | 181252  | 55984  | shortestDistance |
| chrX | 6778256  | 6778671  | 416  | -1.29 | 0.00104  | 0.00736  | ENSMUSG0000006239   | Dgk1       | protein_codi  | 6779306  | 6948363  | upstream     | -842    | 635    | shortestDistance |
| chrX | 7308157  | 7308883  | 727  | -0.8  | 0.0121   | 0.049    | ENSMUSG0000000431   | C1cn5      | protein_codi  | 7153810  | 7319358  | inside       | 10838   | 10475  | shortestDistance |
| chrX | 7312526  | 7312796  | 271  | -2.35 | 6.01E-08 | 2.16E-06 | ENSMUSG0000000431   | C1cn5      | protein_codi  | 7153810  | 7319358  | inside       | 6697    | 6562   | shortestDistance |
| chrX | 7434227  | 7434688  | 462  | 1.47  | 0.000182 | 0.00183  | ENSMUSG00000006301  | 2010204K13 | processed_tr  | 7411817  | 7445143  | inside       | 10685   | 10455  | shortestDistance |
| chrX | 8892247  | 8893620  | 1374 | -0.86 | 0.01     | 0.0425   | ENSMUSG00000005236  | B630019K06 | protein_codi  | 8892382  | 8894964  | overlapStart | 552     | 135    | shortestDistance |
| chrX | 8948417  | 8948822  | 406  | -0.85 | 0.0119   | 0.0484   | ENSMUSG00000008138  | Gm5752     | processed_p   | 8941590  | 8942183  | upstream     | -6437   | 6234   | shortestDistance |
| chrX | 9128168  | 9128977  | 810  | -1.29 | 0.000817 | 0.00609  | ENSMUSG00000008702  | Fhl17-ps3  | unprocessed   | 9123467  | 9123979  | downstream   | 5105    | 4189   | shortestDistance |
| chrX | 9142749  | 9143044  | 296  | -1.38 | 0.000731 | 0.00557  | ENSMUSG00000008702  | Fhl17-ps3  | unprocessed   | 9123467  | 9123979  | downstream   | 19429   | 18770  | shortestDistance |
| chrX | 9199702  | 9200999  | 1298 | -0.86 | 0.00896  | 0.039    | ENSMUSG00000004734  | Land3      | protein_codi  | 9199902  | 9268085  | overlapStart | 448     | 200    | shortestDistance |
| chrX | 9243272  | 9243880  | 609  | -1.27 | 6.78E-05 | 0.000812 | ENSMUSG00000004734  | Land3      | protein_codi  | 9199902  | 9268085  | inside       | 43674   | 24205  | shortestDistance |
| chrX | 9253881  | 9254380  | 500  | -1.02 | 0.00337  | 0.0183   | ENSMUSG00000007969  | Gm14862    | protein_codi  | 9250928  | 9256899  | inside       | 2769    | 2519   | shortestDistance |
| chrX | 9302839  | 9303159  | 321  | -1.63 | 2.89E-05 | 0.000401 | ENSMUSG00000001534  | Xk         | protein_codi  | 9272756  | 9313250  | inside       | 30243   | 10091  | shortestDistance |
| chrX | 9332188  | 9332873  | 686  | -1.26 | 0.000391 | 0.0034   | ENSMUSG00000008367  | Gm6829     | processed_p   | 9327749  | 9328108  | upstream     | -4422   | 4080   | shortestDistance |
| chrX | 9333119  | 9333398  | 280  | -1.06 | 0.0106   | 0.0443   | ENSMUSG00000008367  | Gm6829     | processed_p   | 9327749  | 9328108  | upstream     | -5150   | 5011   | shortestDistance |
| chrX | 9460356  | 9461009  | 654  | 2.33  | 5.33E-07 | 1.38E-05 | ENSMUSG00000001534  | Cybb       | protein_codi  | 9435252  | 9487771  | inside       | 27089   | 25104  | shortestDistance |
| chrX | 9462705  | 9463094  | 390  | 2.96  | 5.27E-10 | 3.72E-08 | ENSMUSG00000001534  | Cybb       | protein_codi  | 9435252  | 9487771  | inside       | 24871   | 24677  | shortestDistance |
| chrX | 9520042  | 9520354  | 313  | -1.12 | 0.00385  | 0.0204   | ENSMUSG00000007771  | Gm25728    | snRNA         | 9532511  | 9532669  | downstream   | 12471   | 12157  | shortestDistance |
| chrX | 9639630  | 9639973  | 344  | -1.14 | 0.00735  | 0.0335   | ENSMUSG00000000317  | Dynl1      | protein_codi  | 9654267  | 9663003  | downstream   | 23201   | 14294  | shortestDistance |
| chrX | 9747249  | 9747970  | 722  | -1.34 | 0.000173 | 0.00176  | ENSMUSG00000000317  | Dynl1      | protein_codi  | 9654267  | 9663003  | upstream     | -84607  | 84246  | shortestDistance |
| chrX | 9752908  | 9753524  | 617  | -1.32 | 0.00075  | 0.00568  | ENSMUSG00000000317  | Dynl1      | protein_codi  | 9654267  | 9663003  | upstream     | -90213  | 89905  | shortestDistance |
| chrX | 9995436  | 9995790  | 355  | -1.09 | 0.00821  | 0.0366   | ENSMUSG00000005445  | Syt15      | protein_codi  | 9885622  | 9994543  | downstream   | 109991  | 893    | shortestDistance |
| chrX | 10117161 | 10117643 | 483  | -1.64 | 2.55E-05 | 0.000361 | ENSMUSG00000009008  | Srpx       | protein_codi  | 10037977 | 10117709 | inside       | 307     | 66     | shortestDistance |
| chrX | 10857024 | 10857500 | 477  | 1.47  | 0.00023  | 0.00221  | ENSMUSG00000008168  | Gm14473    | processed_p   | 10865077 | 10865633 | downstream   | 8371    | 7577   | shortestDistance |
| chrX | 11082187 | 11082535 | 349  | 1.12  | 0.0108   | 0.0451   | ENSMUSG00000008341  | Gm14485    | processed_p   | 11020515 | 11021007 | upstream     | -61354  | 61180  | shortestDistance |
| chrX | 11099582 | 11099932 | 351  | 2.53  | 5.05E-06 | 9.27E-05 | ENSMUSG00000008341  | Gm14485    | processed_p   | 11020515 | 11021007 | upstream     | -78750  | 78575  | shortestDistance |
| chrX | 11361290 | 11361683 | 394  | 1.1   | 0.00516  | 0.0255   | ENSMUSG00000006903  | H2a11j     | protein_codi  | 11327822 | 11328151 | downstream   | 33664   | 33139  | shortestDistance |
| chrX | 11444157 | 11444869 | 713  | -1.03 | 0.00438  | 0.0225   | ENSMUSG00000006903  | H2a11j     | protein_codi  | 11327822 | 11328151 | downstream   | 116691  | 116006 | shortestDistance |
| chrX | 11594319 | 11594910 | 592  | -1.18 | 0.000663 | 0.00516  | ENSMUSG00000008349  | Gm14515    | processed_p   | 11601354 | 11601569 | upstream     | -6740   | 6444   | shortestDistance |
| chrX | 11716522 | 11717193 | 672  | 1.72  | 0.000777 | 0.00584  | ENSMUSG00000008081  | Gm14513    | processed_p   | 11684002 | 11684124 | upstream     | -32734  | 32398  | shortestDistance |
| chrX | 12886149 | 12887069 | 921  | 1.79  | 0.000207 | 0.00203  | ENSMUSG00000007785  | Gm25063    | miRNA         | 12870269 | 12870362 | upstream     | -16247  | 15787  | shortestDistance |
| chrX | 12969072 | 12969722 | 651  | 1.52  | 6.42E-05 | 0.000778 | ENSMUSG00000008341  | Gm14534    | processed_p   | 12944610 | 12944966 | upstream     | -24431  | 24106  | shortestDistance |
| chrX | 13493013 | 13493345 | 333  | 2.28  | 1.08E-05 | 0.000176 | ENSMUSG00000008159  | Gm14506    | processed_p   | 13490498 | 13491033 | upstream     | -2146   | 1980   | shortestDistance |
| chrX | 13636239 | 13636743 | 505  | 0.95  | 0.01     | 0.0426   | ENSMUSG00000004022  | Gpr34      | protein_codi  | 13632089 | 13640858 | inside       | 4402    | 4115   | shortestDistance |
| chrX | 13720428 | 13720838 | 411  | 1.77  | 6.75E-06 | 0.000119 | ENSMUSG000000003101 | Cask       | protein_codi  | 13517080 | 13851367 | inside       | 130734  | 130529 | shortestDistance |
| chrX | 13734700 | 13735120 | 421  | -1.12 | 0.00312  | 0.0173   | ENSMUSG000000003101 | Cask       | protein_codi  | 13517080 | 13851367 | inside       | 116457  | 116247 | shortestDistance |
| chrX | 14628074 | 14629016 | 943  | -1.13 | 0.000439 | 0.00373  | ENSMUSG00000008490  | Gm14505    | lincRNA       | 14796735 | 14839980 | upstream     | -168190 | 167719 | shortestDistance |
| chrX | 14655530 | 14655865 | 336  | -2.39 | 0.000198 | 0.00196  | ENSMUSG00000008490  | Gm14505    | lincRNA       | 14796735 | 14839980 | upstream     | -141037 | 140870 | shortestDistance |
| chrX | 14739056 | 14739369 | 314  | 1.9   | 0.000186 | 0.00186  | ENSMUSG00000008490  | Gm14505    | lincRNA       | 14796735 | 14839980 | upstream     | -57523  | 57366  | shortestDistance |
| chrX | 15322250 | 15322915 | 666  | -1.33 | 3.97E-05 | 0.000522 | ENSMUSG00000008349  | Gm14519    | processed_p   | 15365179 | 15365490 | upstream     | -42597  | 42624  | shortestDistance |
| chrX | 15598375 | 15599264 | 890  | 1.08  | 0.00317  | 0.0175   | ENSMUSG00000008199  | Gm14517    | processed_p   | 15524425 | 15524761 | upstream     | -74059  | 73614  | shortestDistance |
| chrX | 16450709 | 16451035 | 327  | -1.49 | 6.00E-05 | 0.000736 | ENSMUSG00000008283  | Gm14516    | processed_p   | 16379396 | 16379647 | upstream     | -71225  | 71062  | shortestDistance |
| chrX | 16894369 | 16894790 | 422  | -1.16 | 0.00115  | 0.00797  | ENSMUSG00000004013  | Ndp        | protein_codi  | 16885521 | 16911774 | inside       | 17194   | 8848   | shortestDistance |
| chrX | 17017808 | 17018225 | 418  | -1.12 | 0.00721  | 0.033    | ENSMUSG00000004013  | Ndp        | protein_codi  | 16885521 | 16911774 | upstream     | -106242 | 106034 | shortestDistance |
| chrX | 17094824 | 17095170 | 347  | -2.29 | 3.08E-09 | 1.68E-07 | ENSMUSG00000002503  | Ehf2c      | protein_codi  | 17132049 | 17319368 | downstream   | 224371  | 36879  | shortestDistance |
| chrX | 17300277 | 17301001 | 725  | -1.04 | 0.00219  | 0.0132   | ENSMUSG00000002503  | Ehf2c      | protein_codi  | 17132049 | 17319368 | inside       | 18729   | 18367  | shortestDistance |
| chrX | 17318966 | 17319708 | 743  | -1.02 | 0.00198  | 0.0122   | ENSMUSG00000002503  | Ehf2c      | protein_codi  | 17132049 | 17319368 | overlapStart | 31      | 340    | shortestDistance |
| chrX | 17365061 | 17365533 | 473  | -1.94 | 1.95E-08 | 8.27E-07 | ENSMUSG00000006524  | Gm22294    | snRNA         | 17325315 | 17325418 | downstream   | 39982   | 39643  | shortestDistance |
| chrX | 17514027 | 17514416 | 390  | -1.26 | 0.00176  | 0.0112   | ENSMUSG00000002504  | Fundc1     | protein_codi  | 17556564 | 17572325 | downstream   | 58103   | 42148  | shortestDistance |
| chrX | 17590490 | 17591329 | 840  | -1.99 | 3.56E-05 | 0.000477 | ENSMUSG00000002504  | Fundc1     | protein_codi  | 17556564 | 17572325 | upstream     | -18585  | 18165  | shortestDistance |
| chrX | 18442095 | 18442748 | 654  | -1.1  | 0.0117   | 0.0478   | ENSMUSG00000003735  | 4930578C19 | protein_codi  | 18414881 | 18461397 | inside       | 18975   | 18649  | shortestDistance |
| chrX | 18461054 | 18461689 | 636  | -1.53 | 1.37E-05 | 0.000216 | ENSMUSG00000003735  | 4930578C19 | protein_codi  | 18414881 | 18461397 | overlapStart | 25      | 292    | shortestDistance |
| chrX | 18883412 | 18883436 | 295  | -1.47 | 0.000222 | 0.00215  | ENSMUSG00000008275  | Gm6923     | processed_p   | 18920804 | 18921209 | upstream     | -37515  | 37368  | shortestDistance |
| chrX | 18973745 | 18974050 | 306  | -1.65 | 2.67E-05 | 0.000377 | ENSMUSG00000008165  | Gm5383     | processed_p   | 18942612 | 18943228 | downstream   | 31286   | 30517  | shortestDistance |
| chrX | 19153689 | 19153948 | 260  | -0.92 | 0.0122   | 0.0493   | ENSMUSG00000007327  | Gm14636    | processed_tr  | 19156981 | 19167241 | downstream   | 13423   | 3033   | shortestDistance |
| chrX | 19202547 | 19202909 | 363  | 1.85  | 1.28E-05 | 0.000204 | ENSMUSG00000007499  | Gm26652    | lincRNA       | 19224789 | 19237856 | downstream   | 35128   | 21880  | shortestDistance |
| chrX | 19205682 | 19206827 | 846  | -1.61 | 3.92E-05 | 0.000517 | ENSMUSG00000007499  | Gm26652    | lincRNA       | 19224789 | 19237856 | downstream   | 31452   | 17962  | shortestDistance |
| chrX | 19236950 | 19238325 | 1376 | -1.08 | 0.0038   | 0.0201   | ENSMUSG00000007499  | Gm26652    | lincRNA       | 19224789 | 19237856 | overlapStart | 218     | 469    | shortestDistance |
| chrX | 20059113 | 20060302 | 1190 | -0.91 | 0.00977  | 0.0417   | ENSMUSG00000003734  | Chst17     | protein_codi  | 20059560 | 20097521 | overlapStart | 148     | 447    | shortestDistance |
| chrX | 20391838 | 20392630 | 793  | 0.94  | 0.00758  | 0.0343   | ENSMUSG00000008285  | Gm14537    | processed_p   | 20391709 | 20392501 | overlapEnd   | 525     | 129    | shortestDistance |
| chrX | 20521502 | 20522120 | 619  | 3.5   | 7.28E-13 | 1.41E-10 | ENSMUSG000000003731 | Jade3      | protein_codi  | 20425688 | 20519939 | downstream   | 96123   | 1563   | shortestDistance |
| chrX | 21088714 | 21089951 | 1238 | -0.87 | 0.00979  | 0.0418   | ENSMUSG000000003731 | Zfp300     | protein_codi  | 21079174 | 21089527 | overlapStart | 195     | 424    | shortestDistance |
| chrX | 21293724 | 21294047 | 324  | -1.26 | 0.00166  | 0.0106   | ENSMUSG00000008758  | Gm6938     | lincRNA       | 21312210 | 21334727 | downstream   | 40841   | 18163  | shortestDistance |
| chrX | 21334054 | 21334981 | 928  | -1.63 | 2.08E-06 | 4.35E-05 | ENSMUSG00000008758  | Gm6938     | lincRNA       | 21312210 | 21334727 | overlapStart | 209     | 254    | shortestDistance |
| chrX | 21360693 | 21361873 | 1181 | -1.8  | 8.58E-08 | 2.93E-06 | ENSMUSG00000005153  | Gm51224    | transcribed_j | 21360865 | 21364622 | overlapStart | 418     | 172    | shortestDistance |
| chrX | 21829085 | 21829321 | 237  | -1.01 | 0.0118   | 0.0481   | ENSMUSG000000010177 | Gm28268    | lincRNA       | 21751379 | 21761733 | downstream   | 77824   | 67352  | shortestDistance |
| chrX | 23296022 | 23296499 | 478  | -2.12 | 1.55E-06 | 3.40E-05 | ENSMUSG00000003678  | Khl13      | protein_codi  | 23219271 | 23365082 | inside       | 68822   | 68583  | shortestDistance |
| chrX | 23364374 | 23365441 | 1068 | -1.42 | 9.73E-05 | 0.00109  | ENSMUSG00000003678  | Khl13      | protein_codi  | 23219271 | 23365082 | overlapStart | 174     | 359    | shortestDistance |
| chrX | 23710013 | 23710304 | 292  | -1.53 | 0.00254  | 0.0148   | ENSMUSG00000003678  | Wdr4       | protein_codi  | 23693051 | 23806025 | inside       | 17107   | 16962  | shortestDistance |
| chrX | 35924552 | 35925077 | 526  | -1.19 | 0.00135  | 0.00904  | ENSMUSG00000003109  | Dock11     | protein_codi  |          |          |              |         |        |                  |

|      |          |          |      |       |          |          |                    |            |               |          |          |              |         |        |                  |
|------|----------|----------|------|-------|----------|----------|--------------------|------------|---------------|----------|----------|--------------|---------|--------|------------------|
| chrX | 44367702 | 44368680 | 979  | -2.1  | 2.37E-09 | 1.35E-07 | ENSMUSG00000005092 | Dcaf1212   | protein_codi  | 44365458 | 44368342 | overlapStart | 151     | 338    | shortestDistance |
| chrX | 44789510 | 44790486 | 977  | -1.81 | 1.76E-08 | 7.60E-07 | ENSMUSG00000004528 | Dcaf1211   | protein_codi  | 44786570 | 44790197 | overlapStart | 199     | 289    | shortestDistance |
| chrX | 45311890 | 45312205 | 316  | -1.24 | 0.00242  | 0.0142   | ENSMUSG00000008076 | Gm14606    | processed_p   | 45403691 | 45404845 | downstream   | 92797   | 91486  | shortestDistance |
| chrX | 45340343 | 45341000 | 658  | -1.99 | 1.29E-07 | 4.13E-06 | ENSMUSG00000008076 | Gm14606    | processed_p   | 45403691 | 45404845 | downstream   | 64173   | 62691  | shortestDistance |
| chrX | 47001524 | 47001842 | 319  | -2.86 | 2.03E-07 | 6.11E-06 | ENSMUSG00000010123 | Gm29242    | lincRNA       | 46473585 | 46774099 | upstream     | -227584 | 227425 | shortestDistance |
| chrX | 47157570 | 47158076 | 507  | -1.69 | 8.43E-05 | 0.000966 | ENSMUSG00000008349 | Gm14609    | processed_p   | 47380433 | 47381334 | downstream   | -223511 | 223511 | shortestDistance |
| chrX | 47623016 | 47623509 | 494  | -1.83 | 2.38E-06 | 4.88E-05 | ENSMUSG00000008434 | Gm14608    | processed_p   | 47586018 | 47587570 | downstream   | 37244   | 35446  | shortestDistance |
| chrX | 47880079 | 47880434 | 356  | -1.6  | 4.72E-05 | 0.000602 | ENSMUSG00000003109 | Smarca1    | protein_codi  | 47809368 | 47892974 | inside       | 12718   | 12540  | shortestDistance |
| chrX | 47920541 | 47920932 | 392  | -1.51 | 0.000321 | 0.0029   | ENSMUSG00000000117 | Oclr       | protein_codi  | 47912387 | 47965868 | inside       | 8349    | 8154   | shortestDistance |
| chrX | 48425165 | 48425655 | 491  | 0.96  | 0.00825  | 0.0367   | ENSMUSG00000003110 | Elf4       | protein_codi  | 48411046 | 48463132 | inside       | 37722   | 14119  | shortestDistance |
| chrX | 48683501 | 48683822 | 322  | -1.1  | 0.00535  | 0.0263   | ENSMUSG00000005120 | Gpr119     | protein_codi  | 48667979 | 48674478 | upstream     | -9184   | 9023   | shortestDistance |
| chrX | 48884808 | 48885148 | 641  | -1.53 | 0.000545 | 0.00441  | ENSMUSG00000008152 | Gm7219     | processed_p   | 48889879 | 48890175 | downstream   | 5347    | 4731   | shortestDistance |
| chrX | 50443361 | 50443744 | 384  | -2.18 | 4.08E-06 | 7.71E-05 | ENSMUSG00000004817 | Olfir1324  | protein_codi  | 50420998 | 50428498 | upstream     | -15054  | 14863  | shortestDistance |
| chrX | 50909985 | 50910307 | 323  | -1.09 | 0.0114   | 0.0468   | ENSMUSG00000003613 | Frmf7      | protein_codi  | 50895180 | 50942710 | inside       | 32564   | 14805  | shortestDistance |
| chrX | 51397478 | 51397924 | 447  | -1.05 | 0.00841  | 0.0372   | ENSMUSG00000006218 | H6st12     | protein_codi  | 51387212 | 51681856 | inside       | 284155  | 10266  | shortestDistance |
| chrX | 51642688 | 51643076 | 389  | -1.2  | 0.00154  | 0.01     | ENSMUSG00000006218 | H6st12     | protein_codi  | 51387212 | 51681856 | inside       | 38974   | 38780  | shortestDistance |
| chrX | 51913313 | 51913584 | 272  | -1.21 | 0.00348  | 0.0188   | ENSMUSG00000003111 | 1700080016 | protein_codi  | 51968695 | 51972772 | downstream   | 59324   | 55111  | shortestDistance |
| chrX | 52164633 | 52165000 | 368  | -1.24 | 0.00354  | 0.0191   | ENSMUSG00000003111 | Gpc4       | protein_codi  | 52053021 | 52165252 | inside       | 436     | 252    | shortestDistance |
| chrX | 52419665 | 52420328 | 664  | 2.27  | 4.42E-07 | 1.18E-05 | ENSMUSG00000005565 | Gpc3       | protein_codi  | 52272426 | 52613950 | inside       | 193954  | 147239 | shortestDistance |
| chrX | 52514514 | 52514912 | 399  | -1.32 | 0.00336  | 0.0183   | ENSMUSG00000005565 | Gpc3       | protein_codi  | 52272426 | 52613950 | inside       | 99237   | 99038  | shortestDistance |
| chrX | 52790991 | 52791498 | 508  | -1.02 | 0.00315  | 0.0175   | ENSMUSG00000007320 | Ccd160     | protein_codi  | 52791200 | 52799468 | overlapStart | 44      | 209    | shortestDistance |
| chrX | 53038219 | 53038584 | 366  | -2.2  | 1.75E-08 | 7.55E-07 | ENSMUSG00000007605 | Mir450b    | miRNA         | 53047997 | 53048078 | downstream   | 9676    | 9413   | shortestDistance |
| chrX | 53340559 | 53340980 | 422  | -1.35 | 0.000405 | 0.00349  | ENSMUSG00000002307 | Mospd1     | protein_codi  | 53344598 | 53370502 | downstream   | 29732   | 3618   | shortestDistance |
| chrX | 53383066 | 53383552 | 487  | 2.7   | 1.15E-09 | 7.26E-08 | ENSMUSG00000002307 | Mospd1     | protein_codi  | 53344598 | 53370502 | upstream     | -12807  | 12564  | shortestDistance |
| chrX | 53607533 | 53608408 | 876  | -1.36 | 1.88E-05 | 0.000281 | ENSMUSG00000005185 | Rtlb       | protein_codi  | 53608032 | 53608432 | overlapStart | -62     | 24     | shortestDistance |
| chrX | 53643282 | 53644146 | 865  | -1.4  | 1.46E-05 | 0.000226 | ENSMUSG00000006792 | Rtlb       | protein_codi  | 53642488 | 53643682 | overlapStart | -32     | 400    | shortestDistance |
| chrX | 53670199 | 53670758 | 650  | -1.14 | 0.000344 | 0.00306  | ENSMUSG00000006792 | Rtlb       | protein_codi  | 53669177 | 53670408 | overlapStart | -26     | 299    | shortestDistance |
| chrX | 53716306 | 53716955 | 650  | -0.96 | 0.00439  | 0.0226   | ENSMUSG00000008599 | AW822252   | transcribed_i | 53695855 | 53716773 | overlapStart | 143     | 182    | shortestDistance |
| chrX | 53976755 | 53977331 | 577  | -1.73 | 0.000177 | 0.00179  | ENSMUSG00000008671 | Gm15482    | processed_tr  | 53969437 | 53975000 | upstream     | -2043   | 1755   | shortestDistance |
| chrX | 56322764 | 56323118 | 355  | 1.16  | 0.00422  | 0.0219   | ENSMUSG00000008511 | 1600025M17 | lincRNA       | 56317608 | 56320664 | downstream   | 5333    | 2100   | shortestDistance |
| chrX | 56346180 | 56346921 | 742  | -0.96 | 0.00457  | 0.0232   | ENSMUSG00000007317 | Zfp449     | protein_codi  | 56346400 | 56365674 | overlapStart | 150     | 220    | shortestDistance |
| chrX | 56374326 | 56375237 | 912  | -0.87 | 0.00528  | 0.026    | ENSMUSG0000000585  | Mim1012a   | protein_codi  | 56374586 | 56377799 | overlapStart | 196     | 260    | shortestDistance |
| chrX | 56697972 | 56698190 | 219  | -1.32 | 0.00906  | 0.0394   | ENSMUSG00000004839 | Gm26312    | snRNA         | 56725073 | 56725237 | upstream     | -26992  | 26883  | shortestDistance |
| chrX | 56730993 | 56732165 | 1173 | -1.12 | 0.0052   | 0.0257   | ENSMUSG00000002309 | Fhl1       | protein_codi  | 56731787 | 56793346 | overlapStart | -208    | 378    | shortestDistance |
| chrX | 56791280 | 56791550 | 271  | -1.12 | 0.00458  | 0.0233   | ENSMUSG00000002309 | Fhl1       | protein_codi  | 56731787 | 56793346 | inside       | 59628   | 1796   | shortestDistance |
| chrX | 56827523 | 56828104 | 582  | 1.07  | 0.00436  | 0.0224   | ENSMUSG00000006787 | Map7d3     | protein_codi  | 56797858 | 56822326 | upstream     | -5488   | 5197   | shortestDistance |
| chrX | 56938556 | 56938901 | 346  | -1.79 | 0.000867 | 0.00637  | ENSMUSG00000005823 | Adgrg4     | protein_codi  | 56870163 | 57001558 | inside       | 68565   | 62657  | shortestDistance |
| chrX | 57195909 | 57196712 | 804  | 1.12  | 0.00491  | 0.0245   | ENSMUSG00000008580 | Gm14718    | antisense_RI  | 57200643 | 57204378 | upstream     | -4333   | 3931   | shortestDistance |
| chrX | 57372889 | 57373476 | 588  | 2.98  | 1.56E-09 | 9.39E-08 | ENSMUSG00000003113 | RbmX       | protein_codi  | 57383530 | 57393036 | downstream   | 19854   | 10054  | shortestDistance |
| chrX | 57706851 | 57707281 | 431  | 1.49  | 0.00107  | 0.0075   | ENSMUSG00000008717 | Gm8107     | processed_p   | 57736547 | 57738555 | downstream   | 31489   | 29266  | shortestDistance |
| chrX | 57914826 | 57915197 | 372  | -1.57 | 8.14E-05 | 0.000939 | ENSMUSG00000009390 | Gm25023    | snRNA         | 57989473 | 57989579 | upstream     | -74461  | 74276  | shortestDistance |
| chrX | 57935654 | 57936220 | 567  | -1.38 | 0.000397 | 0.00344  | ENSMUSG00000009390 | Gm25023    | snRNA         | 57989473 | 57989579 | upstream     | -53536  | 53253  | shortestDistance |
| chrX | 58030130 | 58030889 | 760  | -1.74 | 1.53E-05 | 0.000237 | ENSMUSG00000006786 | Zic3       | protein_codi  | 58022700 | 58041736 | inside       | 7810    | 7430   | shortestDistance |
| chrX | 59133492 | 59134676 | 1185 | -1.58 | 4.02E-06 | 7.63E-05 | ENSMUSG00000003113 | Fgf13      | protein_codi  | 59062145 | 59568071 | inside       | 433987  | 71347  | shortestDistance |
| chrX | 59134290 | 59135585 | 666  | -1.18 | 0.000302 | 0.00275  | ENSMUSG00000003113 | Fgf13      | protein_codi  | 59062145 | 59568071 | inside       | 432819  | 72775  | shortestDistance |
| chrX | 59179388 | 59179664 | 277  | -1.29 | 0.00543  | 0.0266   | ENSMUSG00000003113 | Fgf13      | protein_codi  | 59062145 | 59568071 | inside       | 388545  | 117243 | shortestDistance |
| chrX | 59251463 | 59251972 | 510  | -2.74 | 6.75E-09 | 3.32E-07 | ENSMUSG00000003113 | Fgf13      | protein_codi  | 59062145 | 59568071 | inside       | 316353  | 189318 | shortestDistance |
| chrX | 59508271 | 59508766 | 496  | -2.1  | 1.32E-07 | 4.19E-06 | ENSMUSG00000003113 | Fgf13      | protein_codi  | 59062145 | 59568071 | inside       | 59553   | 59305  | shortestDistance |
| chrX | 59589008 | 59589589 | 582  | -0.89 | 0.00588  | 0.0282   | ENSMUSG00000003113 | Fgf13      | protein_codi  | 59062145 | 59568071 | upstream     | -21227  | 20937  | shortestDistance |
| chrX | 59817885 | 59818122 | 238  | -1.82 | 0.000172 | 0.00175  | ENSMUSG00000010540 | Gm44318    | miRNA         | 59854661 | 59854729 | upstream     | -36657  | 36539  | shortestDistance |
| chrX | 60177686 | 60178380 | 695  | -1.06 | 0.00259  | 0.015    | ENSMUSG00000003113 | Mcf2       | protein_codi  | 60055956 | 60179089 | inside       | 1056    | 709    | shortestDistance |
| chrX | 60504043 | 60504324 | 282  | -1.69 | 1.46E-05 | 0.000228 | ENSMUSG00000007958 | Gm7073     | protein_codi  | 60436052 | 60539249 | overlapStart | 35065   | 34925  | shortestDistance |
| chrX | 60547079 | 60548320 | 1242 | -1.11 | 0.001    | 0.00716  | ENSMUSG00000008222 | Gm715      | processed_p   | 60548019 | 60548849 | overlapStart | -319    | 301    | shortestDistance |
| chrX | 60892046 | 60892823 | 778  | -0.96 | 0.0052   | 0.0257   | ENSMUSG00000004517 | Sox3       | protein_codi  | 60891366 | 60893430 | inside       | 996     | 607    | shortestDistance |
| chrX | 61166478 | 61166843 | 366  | -1.42 | 0.000291 | 0.00267  | ENSMUSG00000007175 | C230004F18 | processed_tr  | 61116386 | 61175991 | inside       | 50274   | 9148   | shortestDistance |
| chrX | 61722347 | 61723410 | 1064 | -0.96 | 0.00493  | 0.0246   | ENSMUSG00000005761 | Ldnc1      | protein_codi  | 61709497 | 61710955 | downstream   | 13381   | 11392  | shortestDistance |
| chrX | 68495022 | 68495450 | 429  | -2.38 | 4.36E-05 | 0.000565 | ENSMUSG00000008279 | Gm6806     | processed_p   | 68503126 | 68504131 | upstream     | -7890   | 7676   | shortestDistance |
| chrX | 68820877 | 68821424 | 548  | -1.33 | 0.00111  | 0.00773  | ENSMUSG00000007174 | Gm14698    | protein_codi  | 68821093 | 68825168 | overlapStart | 57      | 216    | shortestDistance |
| chrX | 69355651 | 69355970 | 320  | 1.79  | 2.97E-05 | 0.000411 | ENSMUSG00000008667 | Gm14705    | antisense_RI  | 69356596 | 69361269 | downstream   | 5459    | 626    | shortestDistance |
| chrX | 69360168 | 69361494 | 1327 | -0.97 | 0.00695  | 0.0322   | ENSMUSG00000003118 | Aff2       | protein_codi  | 69360294 | 69868037 | overlapStart | 537     | 126    | shortestDistance |
| chrX | 69389718 | 69390077 | 360  | -1.66 | 4.00E-05 | 0.000526 | ENSMUSG00000003118 | Aff2       | protein_codi  | 69360294 | 69868037 | inside       | 29604   | 29424  | shortestDistance |
| chrX | 69891410 | 69891773 | 364  | -2.03 | 1.40E-06 | 3.10E-05 | ENSMUSG00000003118 | Aff2       | protein_codi  | 69360294 | 69868037 | downstream   | 531298  | 23373  | shortestDistance |
| chrX | 70161059 | 70161346 | 288  | -1.51 | 0.000129 | 0.00138  | ENSMUSG00000010051 | 1700111N16 | antisense_RI  | 69929259 | 70143588 | upstream     | -17614  | 17471  | shortestDistance |
| chrX | 70184457 | 70184892 | 436  | -2.62 | 0.000489 | 0.00406  | ENSMUSG00000010051 | 1700111N16 | antisense_RI  | 69929259 | 70143588 | upstream     | -41086  | 40869  | shortestDistance |
| chrX | 70330407 | 70330837 | 431  | -1.29 | 0.00118  | 0.00811  | ENSMUSG00000003584 | ids        | protein_codi  | 70343069 | 70365084 | downstream   | 34462   | 12232  | shortestDistance |
| chrX | 70363493 | 70363821 | 329  | -1.2  | 0.00188  | 0.0117   | ENSMUSG00000003584 | ids        | protein_codi  | 70343069 | 70365084 | inside       | 1427    | 1263   | shortestDistance |
| chrX | 70570627 | 70570887 | 261  | 2.49  | 4.40E-06 | 8.25E-05 | ENSMUSG00000008208 | Gm14728    | unprocessed   | 70564118 | 70564609 | upstream     | -6148   | 6018   | shortestDistance |
| chrX | 70582408 | 70582660 | 253  | -1.13 | 0.00518  | 0.0256   | ENSMUSG00000008146 | Gm14732    | processed_p   | 70600263 | 70600807 | downstream   | 18273   | 17603  | shortestDistance |
| chrX | 70900384 | 70900663 | 280  | -1.26 | 0.00224  | 0.0134   | ENSMUSG00000008093 | Gm6062     | processed_p   | 70978281 | 70978911 | upstream     | -77757  | 77618  | shortestDistance |
| chrX | 70945404 | 70945777 | 374  | -1.34 | 0.000289 | 0.00266  | ENSMUSG00000008093 | Gm6062     | processed_p   | 70978281 | 70978911 | upstream     | -32691  | 32504  | shortestDistance |
| chrX | 71038995 | 71039692 | 698  | -1    |          |          |                    |            |               |          |          |              |         |        |                  |

|      |           |           |      |       |          |          |                               |              |           |           |              |         |        |                  |
|------|-----------|-----------|------|-------|----------|----------|-------------------------------|--------------|-----------|-----------|--------------|---------|--------|------------------|
| chrX | 77546506  | 77546900  | 395  | -1.71 | 1.70E-05 | 0.000259 | ENSMUSG0000002524Tb1x         | protein_codi | 77511013  | 77662983  | inside       | 35690   | 35493  | shortestDistance |
| chrX | 78482868  | 78483586  | 719  | 1.8   | 8.17E-06 | 0.000139 | ENSMUSG0000004799Prrp1        | protein_codi | 78449613  | 78583896  | inside       | 100669  | 33255  | shortestDistance |
| chrX | 78538528  | 78539273  | 746  | 1.15  | 0.00181  | 0.0114   | ENSMUSG0000004799Prrp1        | protein_codi | 78449613  | 78583896  | inside       | 44996   | 44623  | shortestDistance |
| chrX | 79516891  | 79517758  | 868  | -0.84 | 0.00689  | 0.0319   | ENSMUSG0000007307Gm7173       | protein_codi | 79265559  | 79517285  | overlapStart | -39     | 394    | shortestDistance |
| chrX | 81070326  | 81071317  | 992  | -1.52 | 0.00237  | 0.014    | ENSMUSG0000002566Tmem47       | protein_codi | 81070698  | 81097872  | overlapStart | 124     | 372    | shortestDistance |
| chrX | 83818085  | 83818376  | 292  | -2.13 | 7.26E-06 | 0.000126 | ENSMUSG0000000451C Dmd        | protein_codi | 82948870  | 85206141  | inside       | 869360  | 869215 | shortestDistance |
| chrX | 83867509  | 83867844  | 336  | -1.49 | 0.000196 | 0.00194  | ENSMUSG0000000451C Dmd        | protein_codi | 82948870  | 85206141  | inside       | 918806  | 918639 | shortestDistance |
| chrX | 84804831  | 84805178  | 348  | -1.33 | 0.0028   | 0.0159   | ENSMUSG0000000451C Dmd        | protein_codi | 82948870  | 85206141  | inside       | 1856134 | 400963 | shortestDistance |
| chrX | 85041443  | 85041994  | 552  | -1.5  | 0.000276 | 0.00256  | ENSMUSG0000000451C Dmd        | protein_codi | 82948870  | 85206141  | inside       | 2092848 | 164147 | shortestDistance |
| chrX | 85048054  | 85049061  | 1008 | -0.9  | 0.00548  | 0.0268   | ENSMUSG0000000451C Dmd        | protein_codi | 82948870  | 85206141  | inside       | 2099688 | 157080 | shortestDistance |
| chrX | 85079920  | 85080260  | 341  | -1.8  | 3.77E-05 | 5.00E-04 | ENSMUSG0000000451C Dmd        | protein_codi | 82948870  | 85206141  | inside       | 2131220 | 125881 | shortestDistance |
| chrX | 85226628  | 85227391  | 764  | -1.34 | 1.62E-05 | 0.000248 | ENSMUSG00000008137Gm14771     | processed_p  | 85236364  | 85236566  | downstream   | 9556    | 8973   | shortestDistance |
| chrX | 85289748  | 85290227  | 480  | -0.89 | 0.0103   | 0.0436   | ENSMUSG0000003549Fth17a       | protein_codi | 85249679  | 85270288  | downstream   | 40309   | 19460  | shortestDistance |
| chrX | 85304700  | 85305123  | 424  | -2.75 | 0.00276  | 0.0158   | ENSMUSG0000003549Fth17a       | protein_codi | 85249679  | 85270288  | downstream   | 55233   | 34412  | shortestDistance |
| chrX | 85436776  | 85437222  | 447  | -2.94 | 5.86E-08 | 2.12E-06 | ENSMUSG00000008383Gm14765     | processed_p  | 85431827  | 85432152  | downstream   | 5172    | 4624   | shortestDistance |
| chrX | 85797389  | 85798029  | 641  | 1.87  | 2.69E-07 | 7.73E-06 | ENSMUSG00000008121Gm6964      | processed_p  | 85793684  | 85794120  | upstream     | -3589   | 3269   | shortestDistance |
| chrX | 85827837  | 85828502  | 666  | 4.51  | 1.32E-15 | 7.73E-13 | ENSMUSG00000007831Gm14762     | lincRNA      | 85825892  | 85834831  | inside       | 2278    | 1945   | shortestDistance |
| chrX | 86949082  | 86949486  | 405  | -1.71 | 7.38E-07 | 1.82E-05 | ENSMUSG00000005237Ilrap1      | protein_codi | 86740870  | 88115645  | inside       | 1166361 | 208212 | shortestDistance |
| chrX | 87238256  | 87238510  | 255  | 1.67  | 6.22E-05 | 0.000758 | ENSMUSG00000005237Ilrap1      | protein_codi | 86740870  | 88115645  | inside       | 877262  | 497386 | shortestDistance |
| chrX | 88115821  | 88116141  | 321  | -3.6  | 2.73E-08 | 1.11E-06 | ENSMUSG00000005237Ilrap1      | protein_codi | 86740870  | 88115645  | upstream     | -336    | 176    | shortestDistance |
| chrX | 92346906  | 92347197  | 292  | -1.86 | 0.000257 | 0.00242  | ENSMUSG00000006764Mageb18     | protein_codi | 92118879  | 92599572  | inside       | 255220  | 228027 | shortestDistance |
| chrX | 92461759  | 92462137  | 379  | -1.53 | 2.51E-05 | 0.000356 | ENSMUSG00000006764Mageb18     | protein_codi | 92118879  | 92599572  | inside       | 137624  | 137435 | shortestDistance |
| chrX | 92464729  | 92465288  | 560  | -0.98 | 0.00235  | 0.0139   | ENSMUSG00000006764Mageb18     | protein_codi | 92118879  | 92599572  | inside       | 134564  | 134284 | shortestDistance |
| chrX | 92597363  | 92597660  | 298  | -1.07 | 0.00835  | 0.037    | ENSMUSG00000006764Mageb18     | protein_codi | 92118879  | 92599572  | inside       | 2060    | 1912   | shortestDistance |
| chrX | 92786709  | 92787169  | 461  | -1.52 | 0.00088  | 0.00644  | ENSMUSG00000008866Gm25332     | snRNA        | 92882451  | 92882555  | upstream     | -95512  | 95282  | shortestDistance |
| chrX | 93069624  | 93070191  | 568  | -1.1  | 0.00765  | 0.0346   | ENSMUSG00000009332Gm24973     | miRNA        | 92989095  | 92989195  | upstream     | -80713  | 80429  | shortestDistance |
| chrX | 93982719  | 93982975  | 257  | -2.52 | 1.31E-05 | 0.000208 | ENSMUSG00000008131Gm14790     | processed_p  | 93981069  | 93982469  | upstream     | -378    | 250    | shortestDistance |
| chrX | 94032971  | 94033280  | 310  | -1.07 | 0.00487  | 0.0244   | ENSMUSG00000008131Gm14798     | antisense_RI | 94028854  | 94099304  | inside       | 4272    | 4117   | shortestDistance |
| chrX | 94431754  | 94432312  | 559  | -1    | 0.00692  | 0.0321   | ENSMUSG00000008406Gm9003      | processed_p  | 94422678  | 94423295  | upstream     | -8738   | 8459   | shortestDistance |
| chrX | 94540325  | 94541167  | 843  | -1.25 | 8.46E-05 | 0.000968 | ENSMUSG00000002515Maged1      | protein_codi | 94535474  | 94542143  | inside       | 1397    | 976    | shortestDistance |
| chrX | 94548278  | 94548576  | 299  | 1.72  | 0.00025  | 0.00237  | ENSMUSG00000008179Gm9005      | processed_p  | 94546963  | 94547569  | upstream     | -858    | 709    | shortestDistance |
| chrX | 94624935  | 94625517  | 583  | -1.29 | 0.001008 | 0.00119  | ENSMUSG00000008097Gm9009      | processed_p  | 94615800  | 94616125  | downstream   | 9426    | 8810   | shortestDistance |
| chrX | 94689818  | 94689909  | 292  | -1.69 | 0.000317 | 0.00286  | ENSMUSG00000008343Gm5402      | processed_p  | 94671503  | 94673120  | upstream     | -16644  | 16498  | shortestDistance |
| chrX | 94990190  | 94991252  | 1063 | -0.89 | 0.00961  | 0.0412   | ENSMUSG00000008752Gm371       | processed_p  | 94997439  | 94998683  | downstream   | 7962    | 6187   | shortestDistance |
| chrX | 95076982  | 95077660  | 679  | 1.21  | 0.00173  | 0.011    | ENSMUSG00000002565Arhgef9     | protein_codi | 95048935  | 95196856  | inside       | 119535  | 28047  | shortestDistance |
| chrX | 95195382  | 95195737  | 356  | -1.72 | 1.75E-05 | 0.000265 | ENSMUSG00000002565Arhgef9     | protein_codi | 95048935  | 95196856  | inside       | 1296    | 1119   | shortestDistance |
| chrX | 95196334  | 95196947  | 614  | -1.5  | 2.05E-05 | 0.000356 | ENSMUSG00000002565Arhgef9     | protein_codi | 95048935  | 95196856  | overlapStart | 216     | 91     | shortestDistance |
| chrX | 95253663  | 95253930  | 368  | -1.16 | 0.0012   | 0.00826  | ENSMUSG00000008029Gm14807     | processed_p  | 95252916  | 95253898  | overlapStart | 152     | 32     | shortestDistance |
| chrX | 95359088  | 95359423  | 336  | -1.11 | 0.00255  | 0.0148   | ENSMUSG00000008029Gm14806     | processed_p  | 95380371  | 95382480  | downstream   | 23224   | 20948  | shortestDistance |
| chrX | 95441412  | 95441628  | 217  | -1.23 | 0.000479 | 0.00399  | ENSMUSG00000005033Amer1       | protein_codi | 95420318  | 95444872  | inside       | 3352    | 3244   | shortestDistance |
| chrX | 95658096  | 95659261  | 1166 | -0.84 | 0.00446  | 0.0228   | ENSMUSG00000005056Zc4h2       | protein_codi | 95639193  | 95658509  | overlapStart | -169    | 413    | shortestDistance |
| chrX | 95711473  | 95712358  | 886  | -0.93 | 0.0017   | 0.0109   | ENSMUSG0000003504Zc3h12b      | protein_codi | 95711678  | 95932637  | overlapStart | 238     | 205    | shortestDistance |
| chrX | 95963421  | 95963757  | 337  | -1.2  | 0.00249  | 0.0146   | ENSMUSG00000005742Las1l       | protein_codi | 95935335  | 95956962  | upstream     | -6627   | 6459   | shortestDistance |
| chrX | 96042079  | 96042575  | 497  | -1.07 | 0.00908  | 0.0394   | ENSMUSG00000003120Msn         | protein_codi | 96096042  | 96168552  | upstream     | -53715  | 53467  | shortestDistance |
| chrX | 96157909  | 96158297  | 389  | -1.08 | 0.00458  | 0.0233   | ENSMUSG00000003120Msn         | protein_codi | 96096042  | 96168552  | inside       | 62061   | 10255  | shortestDistance |
| chrX | 96184230  | 96184646  | 417  | -1.26 | 0.00539  | 0.0264   | ENSMUSG00000008184Gm14925     | processed_p  | 96194051  | 96194488  | upstream     | -9613   | 9405   | shortestDistance |
| chrX | 96244503  | 96245951  | 1449 | 2.24  | 2.97E-09 | 1.63E-07 | ENSMUSG00000007812F6300228010 | antisense_RI | 96239926  | 96243636  | downstream   | 5301    | 867    | shortestDistance |
| chrX | 96329822  | 96330106  | 285  | -1.03 | 0.00503  | 0.025    | ENSMUSG00000004580Hsf3        | protein_codi | 96306178  | 96456294  | inside       | 126330  | 23644  | shortestDistance |
| chrX | 96501352  | 96501855  | 504  | -1.34 | 0.00118  | 0.00815  | ENSMUSG00000003123Heph        | protein_codi | 96455359  | 96574485  | inside       | 46245   | 45993  | shortestDistance |
| chrX | 96712827  | 96713834  | 1008 | -1.57 | 1.36E-05 | 0.000214 | ENSMUSG00000003121Gpr165      | protein_codi | 96713441  | 96719388  | overlapStart | -111    | 393    | shortestDistance |
| chrX | 96878779  | 96879038  | 260  | -1.41 | 0.000909 | 0.00661  | ENSMUSG00000008273Gm16394     | processed_p  | 96885509  | 96887873  | downstream   | 8965    | 6471   | shortestDistance |
| chrX | 97156144  | 97156492  | 349  | -1.56 | 0.00245  | 0.0144   | ENSMUSG00000008143Gm14800     | processed_p  | 97161655  | 97162926  | downstream   | 6608    | 5163   | shortestDistance |
| chrX | 97376243  | 97376957  | 715  | -0.99 | 0.00207  | 0.0126   | ENSMUSG00000003454Eda2r       | protein_codi | 97333840  | 97377216  | inside       | 616     | 259    | shortestDistance |
| chrX | 98148438  | 98149273  | 836  | -1.33 | 4.52E-05 | 0.000581 | ENSMUSG00000004653Ar          | protein_codi | 98148769  | 98323215  | overlapStart | 87      | 331    | shortestDistance |
| chrX | 98149859  | 98150563  | 705  | -0.99 | 0.00632  | 0.0298   | ENSMUSG00000004653Ar          | protein_codi | 98148769  | 98323215  | inside       | 1442    | 1090   | shortestDistance |
| chrX | 98150812  | 98151121  | 310  | -2.16 | 5.26E-08 | 1.93E-06 | ENSMUSG00000004653Ar          | protein_codi | 98148769  | 98323215  | inside       | 2197    | 2043   | shortestDistance |
| chrX | 98252184  | 98252421  | 238  | -1.53 | 0.00421  | 0.0218   | ENSMUSG00000004653Ar          | protein_codi | 98148769  | 98323215  | inside       | 103533  | 70794  | shortestDistance |
| chrX | 98259612  | 98259970  | 359  | -1.04 | 0.0112   | 0.0462   | ENSMUSG00000004653Ar          | protein_codi | 98148769  | 98323215  | inside       | 110222  | 63245  | shortestDistance |
| chrX | 98291755  | 98292392  | 638  | -1.15 | 0.00021  | 0.00205  | ENSMUSG00000004653Ar          | protein_codi | 98148769  | 98323215  | inside       | 143305  | 30823  | shortestDistance |
| chrX | 98380000  | 98380864  | 865  | -1.68 | 1.34E-05 | 0.000212 | ENSMUSG00000004653Ar          | protein_codi | 98148769  | 98323215  | downstream   | 231663  | 56785  | shortestDistance |
| chrX | 98514328  | 98514916  | 589  | -1.09 | 0.000577 | 0.00463  | ENSMUSG00000008139Gm14815     | processed_p  | 98513900  | 98514387  | overlapStart | -235    | 59     | shortestDistance |
| chrX | 98618904  | 98619226  | 323  | -1.05 | 0.0101   | 0.0428   | ENSMUSG00000003121Ophn1       | protein_codi | 98554277  | 98891025  | inside       | 271960  | 64627  | shortestDistance |
| chrX | 98869797  | 98870111  | 315  | -1.1  | 0.00311  | 0.0173   | ENSMUSG00000003121Ophn1       | protein_codi | 98554277  | 98891025  | inside       | 21071   | 20914  | shortestDistance |
| chrX | 98904197  | 98904983  | 787  | -1.11 | 0.000394 | 0.00342  | ENSMUSG00000003121Ophn1       | protein_codi | 98554277  | 98891025  | upstream     | -13565  | 13172  | shortestDistance |
| chrX | 99316381  | 99316938  | 558  | -1.26 | 0.000733 | 0.00558  | ENSMUSG00000007305Gm14812     | lincRNA      | 99405331  | 99443797  | downstream   | 127137  | 88393  | shortestDistance |
| chrX | 99336257  | 99336497  | 241  | -1.43 | 0.000931 | 0.00674  | ENSMUSG00000007305Gm14812     | lincRNA      | 99405331  | 99443797  | downstream   | 107420  | 68834  | shortestDistance |
| chrX | 99535477  | 99535795  | 319  | -1.13 | 0.0117   | 0.0479   | ENSMUSG00000003440Pja1        | protein_codi | 99465734  | 99471273  | upstream     | -64363  | 64204  | shortestDistance |
| chrX | 99539735  | 99540301  | 567  | -1.98 | 1.23E-06 | 2.79E-05 | ENSMUSG00000003440Pja1        | protein_codi | 99465734  | 99471273  | upstream     | -68745  | 68462  | shortestDistance |
| chrX | 99550144  | 99550730  | 587  | -2.24 | 2.90E-08 | 1.17E-06 | ENSMUSG00000003440Pja1        | protein_codi | 99465734  | 99471273  | upstream     | -79164  | 78871  | shortestDistance |
| chrX | 99581692  | 99582494  | 803  | -1.56 | 9.62E-05 | 0.00108  | ENSMUSG00000008250Gm14816     | processed_p  | 99687481  | 99687774  | downstream   | 105681  | 104987 | shortestDistance |
| chrX | 99603648  | 99604178  | 531  | -1.17 | 0.00307  | 0.0171   | ENSMUSG00000008250Gm14816     | processed_p  | 99687481  | 99687774  | downstream   | 83861   | 83303  | shortestDistance |
| chrX | 100800549 | 100801106 | 558  | -1.09 | 0.00328  | 0.018    | ENSMUSG00000000888Dl3         | protein_codi | 100767722 | 100818410 | inside       | 33106   | 17304  | shortestDistance |
| chrX | 101132094 | 101132758 | 665  |       |          |          |                               |              |           |           |              |         |        |                  |

|      |           |           |      |       |          |          |                               |              |           |           |              |         |        |                  |
|------|-----------|-----------|------|-------|----------|----------|-------------------------------|--------------|-----------|-----------|--------------|---------|--------|------------------|
| chrX | 109160801 | 109161261 | 461  | -2.13 | 1.31E-05 | 0.000208 | ENSMUSG00000003124Sh3bgrl     | protein_codi | 109095365 | 109197873 | inside       | 65666   | 36612  | shortestDistance |
| chrX | 109174892 | 109175650 | 759  | -1.51 | 4.63E-05 | 0.000592 | ENSMUSG00000003124Sh3bgrl     | protein_codi | 109095365 | 109197873 | inside       | 79906   | 22223  | shortestDistance |
| chrX | 109184754 | 109185005 | 252  | 2.48  | 1.60E-05 | 0.000245 | ENSMUSG00000003124Sh3bgrl     | protein_codi | 109095365 | 109197873 | inside       | 89515   | 12868  | shortestDistance |
| chrX | 109185089 | 109185523 | 435  | 2.53  | 1.62E-08 | 7.10E-07 | ENSMUSG00000003124Sh3bgrl     | protein_codi | 109095365 | 109197873 | inside       | 89941   | 12350  | shortestDistance |
| chrX | 109621972 | 109622251 | 280  | -1.83 | 3.27E-05 | 0.000445 | ENSMUSG00000008218Gm4784      | processed_g  | 109388744 | 109392165 | upstream     | -229947 | 229807 | shortestDistance |
| chrX | 110814088 | 110814497 | 410  | -2.26 | 4.26E-07 | 1.14E-05 | ENSMUSG00000005685Pou3f4      | protein_codi | 110814280 | 110817207 | overlapStart | 12      | 192    | shortestDistance |
| chrX | 110814673 | 110815210 | 538  | -1.49 | 0.00433  | 0.0223   | ENSMUSG00000005685Pou3f4      | protein_codi | 110814280 | 110817207 | inside       | 662     | 393    | shortestDistance |
| chrX | 111462421 | 111463892 | 1472 | -1.03 | 0.0018   | 0.0113   | ENSMUSG00000002566Rps6k6a     | protein_codi | 111388192 | 111537959 | inside       | 74803   | 74067  | shortestDistance |
| chrX | 111464173 | 111464411 | 239  | -1.72 | 1.97E-05 | 0.000291 | ENSMUSG00000002566Rps6k6a     | protein_codi | 111388192 | 111537959 | inside       | 73667   | 73548  | shortestDistance |
| chrX | 111696332 | 111697419 | 1089 | -1.27 | 6.77E-05 | 0.000811 | ENSMUSG00000003455Hdx         | protein_codi | 111569931 | 111697079 | overlapStart | 203     | 340    | shortestDistance |
| chrX | 112524728 | 112525088 | 361  | -1.1  | 0.00227  | 0.0136   | ENSMUSG00000002552201010610   | protein_codi | 112495274 | 112558343 | inside       | 29634   | 29454  | shortestDistance |
| chrX | 112600437 | 112601912 | 1476 | -1.01 | 0.00213  | 0.0129   | ENSMUSG000000025522Zfp711     | protein_codi | 112600526 | 112635070 | overlapStart | 648     | 89     | shortestDistance |
| chrX | 112904134 | 112904366 | 233  | -1.35 | 0.0018   | 0.0113   | ENSMUSG00000008108Gm14937     | processed_g  | 112958619 | 112958826 | upstream     | -54369  | 54253  | shortestDistance |
| chrX | 112964099 | 112964468 | 370  | -1.14 | 0.00311  | 0.0173   | ENSMUSG00000008239Gm14938     | processed_g  | 112967089 | 112968031 | upstream     | -2805   | 2621   | shortestDistance |
| chrX | 112978597 | 112978920 | 324  | -2.16 | 2.58E-06 | 5.24E-05 | ENSMUSG00000008496Gm14936     | lincRNA      | 112980864 | 113009754 | downstream   | 30996   | 1944   | shortestDistance |
| chrX | 113003459 | 113003982 | 524  | -1.03 | 0.00265  | 0.0153   | ENSMUSG00000008496Gm14936     | lincRNA      | 112980864 | 113009754 | inside       | 6034    | 5772   | shortestDistance |
| chrX | 114463984 | 114464495 | 512  | -1.68 | 7.53E-05 | 0.000881 | ENSMUSG00000002559Klhl4       | protein_codi | 114474333 | 114560829 | upstream     | -10093  | 9838   | shortestDistance |
| chrX | 114473874 | 114474983 | 1110 | -1.81 | 2.17E-07 | 6.44E-06 | ENSMUSG00000002559Klhl4       | protein_codi | 114474333 | 114560829 | overlapStart | 95      | 459    | shortestDistance |
| chrX | 120292802 | 120293211 | 410  | -1.27 | 0.00389  | 0.0205   | ENSMUSG00000003475Pcdh11x     | protein_codi | 120290259 | 120910619 | inside       | 2747    | 2543   | shortestDistance |
| chrX | 122396671 | 122398057 | 1387 | -1.06 | 0.000401 | 0.00348  | ENSMUSG00000005573Nap11x      | protein_codi | 122394565 | 122397401 | overlapStart | 37      | 656    | shortestDistance |
| chrX | 128576204 | 128576513 | 310  | -1.07 | 0.00577  | 0.0278   | ENSMUSG00000008041Gm26475     | miRNA        | 128522689 | 128522809 | upstream     | -53549  | 53395  | shortestDistance |
| chrX | 129303994 | 129304417 | 424  | -1.58 | 1.42E-05 | 0.000222 | ENSMUSG00000008798Gm22225     | misc_RNA     | 129304796 | 129305073 | downstream   | 867     | 379    | shortestDistance |
| chrX | 129329497 | 129329809 | 313  | -1.24 | 0.00776  | 0.035    | ENSMUSG00000008798Gm22225     | misc_RNA     | 129304796 | 129305073 | upstream     | -24580  | 24424  | shortestDistance |
| chrX | 129494535 | 129495104 | 570  | -2.09 | 7.43E-06 | 0.000129 | ENSMUSG00000008433Gm14986     | processed_g  | 129517525 | 129518526 | downstream   | 23706   | 22421  | shortestDistance |
| chrX | 129682410 | 129682857 | 448  | -1.25 | 0.000591 | 0.00471  | ENSMUSG00000003448Diahp2      | protein_codi | 129749742 | 130465834 | upstream     | -67108  | 66885  | shortestDistance |
| chrX | 129690568 | 129691141 | 574  | -1.28 | 0.000231 | 0.00222  | ENSMUSG00000003448Diahp2      | protein_codi | 129749742 | 130465834 | upstream     | -58888  | 58601  | shortestDistance |
| chrX | 129737299 | 129737951 | 653  | -1.72 | 5.77E-06 | 0.000104 | ENSMUSG00000003448Diahp2      | protein_codi | 129749742 | 130465834 | upstream     | -12117  | 11791  | shortestDistance |
| chrX | 129742877 | 129743483 | 607  | -1.23 | 0.00118  | 0.00812  | ENSMUSG00000003448Diahp2      | protein_codi | 129749742 | 130465834 | upstream     | -6562   | 6259   | shortestDistance |
| chrX | 129770650 | 129771002 | 353  | -1.7  | 0.00431  | 0.0222   | ENSMUSG00000003448Diahp2      | protein_codi | 129749742 | 130465834 | inside       | 21084   | 20908  | shortestDistance |
| chrX | 129776784 | 129777089 | 306  | -0.93 | 0.00748  | 0.034    | ENSMUSG00000003448Diahp2      | protein_codi | 129749742 | 130465834 | inside       | 27194   | 27042  | shortestDistance |
| chrX | 129777281 | 129777986 | 706  | -0.96 | 0.00326  | 0.0179   | ENSMUSG00000003448Diahp2      | protein_codi | 129749742 | 130465834 | inside       | 27892   | 27539  | shortestDistance |
| chrX | 129974884 | 129975362 | 479  | -1.72 | 6.61E-06 | 0.000117 | ENSMUSG00000003448Diahp2      | protein_codi | 129749742 | 130465834 | inside       | 225381  | 225142 | shortestDistance |
| chrX | 130309684 | 130310022 | 339  | -3.07 | 4.57E-08 | 1.71E-06 | ENSMUSG00000003448Diahp2      | protein_codi | 129749742 | 130465834 | inside       | 560111  | 15812  | shortestDistance |
| chrX | 130423112 | 130423396 | 285  | -1.54 | 0.000736 | 0.0056   | ENSMUSG00000003448Diahp2      | protein_codi | 129749742 | 130465834 | inside       | 673512  | 42438  | shortestDistance |
| chrX | 130480173 | 130481215 | 243  | -1.36 | 0.00153  | 0.00996  | ENSMUSG00000003448Diahp2      | protein_codi | 129749742 | 130465834 | downstream   | 731352  | 15139  | shortestDistance |
| chrX | 130548969 | 130549903 | 935  | -1.07 | 0.000361 | 0.00318  | ENSMUSG00000008302Gm14982     | processed_g  | 130561456 | 130561897 | downstream   | 12461   | 11553  | shortestDistance |
| chrX | 130808569 | 130809307 | 739  | 1.36  | 0.000338 | 0.00302  | ENSMUSG00000007704Gm26209     | miRNA        | 130887669 | 130887778 | downstream   | 78840   | 78362  | shortestDistance |
| chrX | 133688455 | 133689368 | 824  | -1.14 | 0.000208 | 0.00203  | ENSMUSG00000005132Pcdh19      | protein_codi | 133582860 | 133688987 | overlapStart | 31      | 381    | shortestDistance |
| chrX | 133734823 | 133735324 | 820  | -0.9  | 0.0101   | 0.0429   | ENSMUSG00000009697Gm26851     | lincRNA      | 133687780 | 133707262 | downstream   | 47294   | 27561  | shortestDistance |
| chrX | 134296375 | 134296734 | 360  | -1.02 | 0.00893  | 0.0389   | ENSMUSG00000003357Tmem35a     | protein_codi | 134295225 | 134305969 | inside       | 1329    | 1150   | shortestDistance |
| chrX | 134564352 | 134564811 | 460  | 2.69  | 9.46E-09 | 4.46E-07 | ENSMUSG00000003126Gla         | protein_codi | 134542336 | 134583570 | inside       | 18988   | 18759  | shortestDistance |
| chrX | 134600184 | 134600547 | 364  | 0.9   | 0.0111   | 0.0458   | ENSMUSG00000003126Gla         | protein_codi | 134588149 | 134601125 | inside       | 759     | 578    | shortestDistance |
| chrX | 134651909 | 134652508 | 600  | 1.93  | 6.36E-05 | 0.000772 | ENSMUSG00000008522Gm7855      | processed_g  | 134625058 | 134625744 | upstream     | -26464  | 26165  | shortestDistance |
| chrX | 134718507 | 134718870 | 364  | 1.04  | 0.00534  | 0.0262   | ENSMUSG00000003346Armcx1      | protein_codi | 134717963 | 134721917 | inside       | 725     | 544    | shortestDistance |
| chrX | 135087037 | 135087716 | 680  | 0.97  | 0.0108   | 0.045    | ENSMUSG000000089753632454122F | processed_tr | 135022734 | 135060336 | upstream     | -27040  | 26701  | shortestDistance |
| chrX | 135242745 | 135243212 | 468  | -1.3  | 0.000569 | 0.00457  | ENSMUSG00000008170Gm15022     | processed_g  | 135240154 | 135240899 | downstream   | 2824    | 1846   | shortestDistance |
| chrX | 135738733 | 135739091 | 359  | -1.18 | 0.000673 | 0.00522  | ENSMUSG00000007296Armc5       | protein_codi | 135742733 | 135747322 | upstream     | -3821   | 3642   | shortestDistance |
| chrX | 135795570 | 135796793 | 1224 | -1.03 | 0.00143  | 0.00946  | ENSMUSG00000004338Grasp1      | protein_codi | 135742733 | 135803474 | inside       | 53449   | 6681   | shortestDistance |
| chrX | 136203587 | 136204196 | 610  | -1.09 | 0.00168  | 0.0107   | ENSMUSG00000005403Ctca15      | protein_codi | 136200948 | 136203876 | overlapStart | -16     | 289    | shortestDistance |
| chrX | 136615861 | 136616371 | 511  | -1.05 | 0.00452  | 0.0231   | ENSMUSG00000004455Tceal3      | protein_codi | 136590842 | 136668378 | inside       | 25274   | 25019  | shortestDistance |
| chrX | 136666299 | 136666873 | 575  | -1.53 | 0.000589 | 0.0047   | ENSMUSG00000004455Tceal3      | protein_codi | 136590842 | 136668378 | inside       | 75744   | 1505   | shortestDistance |
| chrX | 136707838 | 136708754 | 917  | -0.89 | 0.0061   | 0.029    | ENSMUSG00000004953Tceal1      | protein_codi | 136707982 | 136711478 | overlapStart | 314     | 144    | shortestDistance |
| chrX | 136809169 | 136809616 | 448  | -1.14 | 0.0035   | 0.0189   | ENSMUSG00000008736BC065397    | processed_tr | 136741824 | 136803364 | downstream   | 67568   | 5805   | shortestDistance |
| chrX | 136820273 | 136820651 | 379  | -0.99 | 0.00407  | 0.0212   | ENSMUSG00000003142Plp1        | protein_codi | 136822671 | 136839733 | upstream     | -2209   | 2020   | shortestDistance |
| chrX | 136867982 | 136868940 | 959  | -0.97 | 0.00368  | 0.0197   | ENSMUSG00000004346Rat9b9      | protein_codi | 136858147 | 136868755 | overlapStart | 294     | 185    | shortestDistance |
| chrX | 137569565 | 137570189 | 625  | -1.5  | 8.12E-05 | 0.000938 | ENSMUSG000000059201Irapl2     | protein_codi | 137570608 | 138846946 | upstream     | -731    | 419    | shortestDistance |
| chrX | 137570384 | 137571256 | 873  | -1.63 | 1.14E-05 | 0.000184 | ENSMUSG000000059201Irapl2     | protein_codi | 137570608 | 138846946 | overlapStart | 212     | 224    | shortestDistance |
| chrX | 137825553 | 137858360 | 808  | -2.11 | 1.60E-08 | 7.01E-07 | ENSMUSG000000059201Irapl2     | protein_codi | 137570608 | 138846946 | inside       | 12348   | 11945  | shortestDistance |
| chrX | 137820538 | 137821098 | 561  | -1.8  | 2.65E-06 | 5.35E-05 | ENSMUSG000000059201Irapl2     | protein_codi | 137570608 | 138846946 | inside       | 50210   | 49930  | shortestDistance |
| chrX | 137666819 | 137667351 | 533  | -1.33 | 0.000441 | 0.00374  | ENSMUSG000000059201Irapl2     | protein_codi | 137570608 | 138846946 | inside       | 96477   | 96211  | shortestDistance |
| chrX | 137687955 | 137688472 | 518  | -1.32 | 0.000261 | 0.00245  | ENSMUSG000000059201Irapl2     | protein_codi | 137570608 | 138846946 | inside       | 117606  | 117347 | shortestDistance |
| chrX | 138170029 | 138170500 | 472  | -1.29 | 0.000495 | 0.00409  | ENSMUSG000000059201Irapl2     | protein_codi | 137570608 | 138846946 | inside       | 599656  | 599421 | shortestDistance |
| chrX | 138620028 | 138620539 | 512  | -2.45 | 2.40E-07 | 7.04E-06 | ENSMUSG000000059201Irapl2     | protein_codi | 137570608 | 138846946 | inside       | 1049676 | 226407 | shortestDistance |
| chrX | 138913797 | 138915006 | 1210 | -1.48 | 1.30E-05 | 0.000206 | ENSMUSG00000005285Nrk         | protein_codi | 138914430 | 139010532 | overlapStart | -28     | 576    | shortestDistance |
| chrX | 139231191 | 139231482 | 292  | -1.14 | 0.00335  | 0.0183   | ENSMUSG00000004251Mum1f1      | protein_codi | 139210042 | 139238335 | inside       | 21294   | 6853   | shortestDistance |
| chrX | 139432459 | 139433138 | 680  | -1.12 | 0.000679 | 0.00526  | ENSMUSG00000004249D330045A20  | protein_codi | 139480367 | 139554582 | upstream     | -47569  | 47229  | shortestDistance |
| chrX | 139550480 | 139550938 | 459  | 1.81  | 3.39E-05 | 0.000459 | ENSMUSG00000004249D330045A20  | protein_codi | 139480367 | 139554582 | inside       | 70342   | 3644   | shortestDistance |
| chrX | 139552125 | 139552470 | 346  | 2.26  | 5.56E-07 | 1.43E-05 | ENSMUSG00000004249D330045A20  | protein_codi | 139480367 | 139554582 | inside       | 71931   | 2112   | shortestDistance |
| chrX | 139570046 | 139570506 | 461  | 1.17  | 0.00339  | 0.0184   | ENSMUSG00000003143Rnf128      | protein_codi | 139563316 | 139673145 | inside       | 6960    | 6730   | shortestDistance |
| chrX | 139774339 | 139775362 | 1024 | -1.12 | 0.00392  | 0.0206   | ENSMUSG00000007294Riply1      | protein_codi | 139779549 | 139782353 | downstream   | 7503    | 4187   | shortestDistance |
| chrX | 139785534 | 139786184 | 651  | -1.5  | 2.11     |          |                               |              |           |           |              |         |        |                  |

|      |           |           |      |       |          |          |                             |              |           |           |              |        |        |                  |
|------|-----------|-----------|------|-------|----------|----------|-----------------------------|--------------|-----------|-----------|--------------|--------|--------|------------------|
| chrX | 145057208 | 145057537 | 330  | -1.13 | 0.00241  | 0.0142   | ENSMUSG0000007167Rtl4       | protein_codi | 144688907 | 145122411 | inside       | 368465 | 64874  | shortestDistance |
| chrX | 145261277 | 145262168 | 442  | -1.26 | 0.00134  | 0.00898  | ENSMUSG0000008208Gm6441     | processed_p  | 145264831 | 145265526 | downstream   | 3578   | 2663   | shortestDistance |
| chrX | 145278793 | 145279577 | 785  | -1.54 | 3.32E-05 | 0.000451 | ENSMUSG00000004170Lhfp1     | protein_codi | 145290359 | 145349089 | downstream   | 69904  | 10782  | shortestDistance |
| chrX | 145307133 | 145307575 | 443  | -0.91 | 0.00777  | 0.035    | ENSMUSG0000004170Lhfp1      | protein_codi | 145290359 | 145349089 | inside       | 41735  | 16774  | shortestDistance |
| chrX | 145308439 | 145309013 | 575  | -1.45 | 0.00611  | 0.0291   | ENSMUSG00000004170Lhfp1     | protein_codi | 145290359 | 145349089 | inside       | 40363  | 18080  | shortestDistance |
| chrX | 145342106 | 145342793 | 688  | -1.17 | 0.000839 | 0.00622  | ENSMUSG00000004170Lhfp1     | protein_codi | 145290359 | 145349089 | inside       | 6639   | 6296   | shortestDistance |
| chrX | 145567574 | 145567924 | 351  | 2.68  | 4.90E-07 | 1.29E-05 | ENSMUSG000001001Gm5644      | processed_p  | 145601837 | 145602301 | downstream   | 34552  | 33913  | shortestDistance |
| chrX | 145639277 | 145639684 | 408  | -1.97 | 1.19E-06 | 2.71E-05 | ENSMUSG0000008164Gm15060    | processed_p  | 145646506 | 145647453 | upstream     | -7026  | 6822   | shortestDistance |
| chrX | 145657036 | 145657273 | 238  | -1.13 | 0.0072   | 0.033    | ENSMUSG0000008164Gm15060    | processed_p  | 145646506 | 145647453 | downstream   | 10648  | 9583   | shortestDistance |
| chrX | 145758211 | 145759004 | 794  | -1.43 | 0.00032  | 0.00289  | ENSMUSG0000008277Gm15058    | processed_p  | 145753499 | 145753956 | upstream     | -4652  | 4255   | shortestDistance |
| chrX | 145849068 | 145849963 | 896  | -1.99 | 6.34E-07 | 1.60E-05 | ENSMUSG0000008091Gm6446     | processed_p  | 145833317 | 145834134 | downstream   | 16199  | 14934  | shortestDistance |
| chrX | 146513321 | 146513618 | 298  | 1.14  | 0.00986  | 0.042    | ENSMUSG0000008119Gm15076    | processed_p  | 146519232 | 146519705 | upstream     | -5762  | 5614   | shortestDistance |
| chrX | 146627929 | 146628177 | 249  | -1.29 | 0.0022   | 0.0133   | ENSMUSG0000008414Gm15075    | processed_p  | 146652038 | 146652514 | downstream   | 24461  | 23861  | shortestDistance |
| chrX | 146960019 | 146960251 | 233  | -1.77 | 3.50E-05 | 0.00047  | ENSMUSG0000004138Htr2c      | protein_codi | 146962513 | 147197277 | upstream     | -2378  | 2262   | shortestDistance |
| chrX | 146962748 | 146963231 | 484  | -1.12 | 0.00182  | 0.0115   | ENSMUSG0000004138Htr2c      | protein_codi | 146962513 | 147197277 | inside       | 477    | 235    | shortestDistance |
| chrX | 147055788 | 147056095 | 308  | -1.12 | 0.00148  | 0.0097   | ENSMUSG0000004138Htr2c      | protein_codi | 146962513 | 147197277 | inside       | 93429  | 93275  | shortestDistance |
| chrX | 147119219 | 147119749 | 531  | -1.93 | 3.56E-07 | 9.84E-06 | ENSMUSG00000004138Htr2c     | protein_codi | 146962513 | 147197277 | inside       | 156971 | 77528  | shortestDistance |
| chrX | 147553240 | 147554331 | 1092 | -1.23 | 0.000263 | 0.00247  | ENSMUSG0000003129Lrch2      | protein_codi | 147470375 | 147554081 | overlapStart | 295    | 250    | shortestDistance |
| chrX | 147608719 | 147609035 | 317  | -1.1  | 0.00636  | 0.03     | ENSMUSG0000003129Lrch2      | protein_codi | 147470375 | 147554081 | upstream     | -54796 | 54638  | shortestDistance |
| chrX | 147674560 | 147674978 | 419  | -1.91 | 0.0013   | 0.0088   | ENSMUSG00000080628Gm16400   | unprocessed  | 147720978 | 147728892 | upstream     | -46209 | 46000  | shortestDistance |
| chrX | 150440597 | 150441449 | 853  | -1.15 | 0.000552 | 0.00446  | ENSMUSG00000004135Tmem29    | protein_codi | 150397773 | 150459154 | inside       | 18131  | 17705  | shortestDistance |
| chrX | 151107107 | 151107707 | 601  | 4.02  | 3.52E-14 | 1.16E-11 | ENSMUSG00000002526Tsr2      | protein_codi | 151087094 | 151096543 | upstream     | -10864 | 10564  | shortestDistance |
| chrX | 151168352 | 151168841 | 490  | -1.19 | 0.00503  | 0.025    | ENSMUSG0000008628Gm15138    | lincRNA      | 151169700 | 151171764 | upstream     | -1104  | 859    | shortestDistance |
| chrX | 151496545 | 151497017 | 473  | 2.01  | 5.09E-06 | 9.33E-05 | ENSMUSG0000008242Gm15148    | processed_p  | 151493114 | 151493269 | upstream     | -3512  | 3276   | shortestDistance |
| chrX | 151508330 | 151509078 | 749  | 2.2   | 2.33E-07 | 6.86E-06 | ENSMUSG0000004122Pfh8       | protein_codi | 151520672 | 151633859 | upstream     | -11968 | 11594  | shortestDistance |
| chrX | 152202719 | 152203214 | 496  | 1.79  | 2.12E-05 | 0.000311 | ENSMUSG00000004111Iqsc2     | protein_codi | 152144268 | 152225236 | inside       | 58698  | 22022  | shortestDistance |
| chrX | 152307996 | 152308238 | 243  | -1.61 | 0.00149  | 0.00977  | ENSMUSG0000008740Katr       | protein_codi | 152294828 | 152327495 | inside       | 19378  | 13168  | shortestDistance |
| chrX | 152322821 | 152323172 | 352  | 0.98  | 0.0116   | 0.0475   | ENSMUSG0000008740Katr       | protein_codi | 152294828 | 152327495 | inside       | 4499   | 4323   | shortestDistance |
| chrX | 152657439 | 152657890 | 452  | 3.02  | 9.73E-10 | 6.37E-08 | ENSMUSG00000004518Shroom2   | protein_codi | 152609509 | 152769465 | inside       | 111801 | 47930  | shortestDistance |
| chrX | 152781744 | 152782467 | 724  | -1.17 | 0.00133  | 0.00895  | ENSMUSG0000002533Gpr143     | protein_codi | 152781921 | 152808646 | overlapStart | 185    | 177    | shortestDistance |
| chrX | 153369855 | 153370101 | 247  | 1.56  | 0.000938 | 0.00678  | ENSMUSG00000004164Kf8       | protein_codi | 153237466 | 153396132 | inside       | 132512 | 26031  | shortestDistance |
| chrX | 153451988 | 153452283 | 296  | -1.68 | 2.71E-05 | 0.00038  | ENSMUSG00000005014Ublqnl    | protein_codi | 153498227 | 153501570 | upstream     | -46091 | 45944  | shortestDistance |
| chrX | 153454377 | 153454752 | 376  | -1.94 | 1.22E-05 | 0.000196 | ENSMUSG00000005014Ublqnl    | protein_codi | 153498227 | 153501570 | upstream     | -43663 | 43475  | shortestDistance |
| chrX | 153695850 | 153696495 | 646  | -1.52 | 3.81E-05 | 0.000505 | ENSMUSG00000004163Kctd12b   | protein_codi | 153685154 | 153696391 | overlapStart | 219    | 104    | shortestDistance |
| chrX | 153831946 | 153833081 | 1136 | -1.03 | 0.00101  | 0.00722  | ENSMUSG00000004655Spin2c    | protein_codi | 153832225 | 153834243 | overlapStart | 289    | 279    | shortestDistance |
| chrX | 153887105 | 153887682 | 578  | -1.64 | 2.00E-05 | 0.000295 | ENSMUSG00000006564Gm25895   | snRNA        | 153915116 | 153915215 | downstream   | 27821  | 27434  | shortestDistance |
| chrX | 153927990 | 153928506 | 517  | -2.07 | 1.06E-06 | 2.46E-05 | ENSMUSG00000006564Gm25895   | snRNA        | 153915116 | 153915215 | upstream     | -13033 | 12775  | shortestDistance |
| chrX | 153932494 | 153932959 | 466  | -1.07 | 0.00225  | 0.0146   | ENSMUSG00000006564Gm25895   | snRNA        | 153915116 | 153915215 | upstream     | -17511 | 17279  | shortestDistance |
| chrX | 153946386 | 153946831 | 446  | -1.57 | 3.66E-05 | 0.000489 | ENSMUSG00000006564Gm25895   | snRNA        | 153915116 | 153915215 | upstream     | -31393 | 31171  | shortestDistance |
| chrX | 154523691 | 154524248 | 558  | 1.37  | 0.00172  | 0.011    | ENSMUSG0000002505Samt4      | protein_codi | 154482002 | 154484682 | downstream   | 41968  | 39009  | shortestDistance |
| chrX | 155177178 | 155177815 | 638  | 1.01  | 0.00319  | 0.0176   | ENSMUSG0000008136Gm8595     | processed_p  | 155179281 | 155179910 | upstream     | -1785  | 1466   | shortestDistance |
| chrX | 155278530 | 155278812 | 283  | 1.76  | 1.38E-05 | 0.000217 | ENSMUSG0000002528Aco9       | protein_codi | 155262443 | 155297654 | inside       | 16228  | 16087  | shortestDistance |
| chrX | 155901676 | 155902167 | 492  | -2.01 | 1.86E-06 | 3.96E-05 | ENSMUSG00000005510Gm15155   | protein_codi | 155624741 | 156345887 | inside       | 277181 | 276935 | shortestDistance |
| chrX | 157006057 | 157006648 | 592  | -1.58 | 8.50E-05 | 0.000971 | ENSMUSG00000008571Gm15163   | processed_p  | 157016229 | 157017530 | downstream   | 11178  | 9581   | shortestDistance |
| chrX | 157089342 | 157089675 | 334  | -2.28 | 4.94E-06 | 9.10E-05 | ENSMUSG0000008934Gm22666    | snRNA        | 157053955 | 157054118 | downstream   | 35553  | 35224  | shortestDistance |
| chrX | 157428884 | 157483269 | 386  | 1.47  | 0.000443 | 0.00375  | ENSMUSG00000007170Sms       | protein_codi | 157443855 | 157492287 | inside       | 9211   | 9018   | shortestDistance |
| chrX | 157732445 | 157732886 | 442  | -1.47 | 0.000647 | 0.00506  | ENSMUSG00000004147Smpx      | protein_codi | 157698910 | 157752591 | inside       | 33756  | 19705  | shortestDistance |
| chrX | 157817573 | 157818654 | 1082 | -0.87 | 0.00914  | 0.0396   | ENSMUSG0000004748Khl34      | protein_codi | 157818435 | 157820369 | overlapStart | -321   | 219    | shortestDistance |
| chrX | 158209007 | 158209553 | 547  | 1.43  | 0.000168 | 0.00171  | ENSMUSG00000008313Gm15170   | processed_p  | 158174826 | 158177487 | downstream   | 34454  | 31520  | shortestDistance |
| chrX | 158233348 | 158233634 | 287  | -1.13 | 0.000389 | 0.00339  | ENSMUSG00000008179Gm8662    | processed_p  | 158248797 | 158249370 | upstream     | -15306 | 15163  | shortestDistance |
| chrX | 158236230 | 158236591 | 362  | -1.38 | 0.00087  | 0.00639  | ENSMUSG00000008179Gm8662    | processed_p  | 158248797 | 158249370 | upstream     | -12387 | 12206  | shortestDistance |
| chrX | 158923329 | 158923533 | 205  | -1.02 | 0.00992  | 0.0422   | ENSMUSG0000008202Gm5764     | processed_p  | 158833435 | 158834319 | downstream   | 89996  | 89010  | shortestDistance |
| chrX | 159145176 | 159145575 | 400  | 1.3   | 0.00126  | 0.00855  | ENSMUSG00000008312Gm15189   | processed_p  | 159105915 | 159108491 | downstream   | 39461  | 36685  | shortestDistance |
| chrX | 159155433 | 159156243 | 811  | -1.09 | 0.00261  | 0.0151   | ENSMUSG00000008312Gm15189   | processed_p  | 159105915 | 159108491 | downstream   | 49923  | 46942  | shortestDistance |
| chrX | 159638477 | 159639250 | 774  | 1.87  | 4.23E-08 | 1.60E-06 | ENSMUSG00000004099Sh3kbp1   | protein_codi | 159627272 | 159978069 | inside       | 11592  | 11205  | shortestDistance |
| chrX | 159685567 | 159685870 | 304  | 1.65  | 0.00075  | 0.00568  | ENSMUSG00000004099Sh3kbp1   | protein_codi | 159627272 | 159978069 | inside       | 58446  | 58295  | shortestDistance |
| chrX | 159778738 | 159779284 | 547  | 2.59  | 9.44E-08 | 3.17E-06 | ENSMUSG00000004099Sh3kbp1   | protein_codi | 159627272 | 159978069 | inside       | 151739 | 151466 | shortestDistance |
| chrX | 159909468 | 159909915 | 448  | 1.77  | 5.34E-07 | 1.38E-05 | ENSMUSG00000004099Sh3kbp1   | protein_codi | 159627272 | 159978069 | inside       | 282420 | 68154  | shortestDistance |
| chrX | 159910560 | 159911122 | 563  | 2.73  | 2.82E-09 | 1.56E-07 | ENSMUSG00000004099Sh3kbp1   | protein_codi | 159627272 | 159978069 | inside       | 283569 | 66947  | shortestDistance |
| chrX | 160390376 | 160391191 | 816  | -0.94 | 0.0058   | 0.0279   | ENSMUSG0000003129Adgrg2     | protein_codi | 160390690 | 160498070 | overlapStart | 94     | 314    | shortestDistance |
| chrX | 160750935 | 160751201 | 267  | 1.24  | 0.0115   | 0.0471   | ENSMUSG0000006216Ppf1       | protein_codi | 160623094 | 160735765 | upstream     | -15303 | 15170  | shortestDistance |
| chrX | 161162508 | 161163316 | 809  | -1.31 | 2.35E-05 | 0.000338 | ENSMUSG0000000003Scm12      | protein_codi | 161117193 | 161258213 | inside       | 45719  | 45315  | shortestDistance |
| chrX | 161514370 | 161514734 | 365  | -1.18 | 0.00339  | 0.0184   | ENSMUSG00000008184Prkac-ps1 | processed_p  | 161485567 | 161486485 | upstream     | -28067 | 27885  | shortestDistance |
| chrX | 161537306 | 161537685 | 380  | -1.01 | 0.00378  | 0.0201   | ENSMUSG00000008184Prkac-ps1 | processed_p  | 161485567 | 161486485 | upstream     | -51011 | 50821  | shortestDistance |
| chrX | 161726279 | 161726616 | 338  | -1.08 | 0.00384  | 0.0203   | ENSMUSG00000004351Ral2      | protein_codi | 161717069 | 161779496 | inside       | 9379   | 9210   | shortestDistance |
| chrX | 161907954 | 161908263 | 310  | -1.35 | 0.000775 | 0.00255  | ENSMUSG00000008757Gm15202   | antisense_R1 | 161908223 | 161908777 | overlapStart | -115   | 40     | shortestDistance |
| chrX | 161972755 | 161973041 | 287  | 2.22  | 6.95E-07 | 1.73E-05 | ENSMUSG00000005949Nhs       | protein_codi | 161833296 | 162159730 | inside       | 186832 | 139459 | shortestDistance |
| chrX | 162510232 | 162510904 | 673  | 1.48  | 3.63E-05 | 0.000486 | ENSMUSG00000004085Reps2     | protein_codi | 162411954 | 162643649 | inside       | 133081 | 98278  | shortestDistance |
| chrX | 162520389 | 162520708 | 320  | -1.06 | 0.0112   | 0.0463   | ENSMUSG00000004085Reps2     | protein_codi | 162411954 | 162643649 | inside       | 123101 | 108435 | shortestDistance |
| chrX | 162653514 | 162653989 | 476  | 2.81  | 4.38E-07 | 1.17E-05 | ENSMUSG00000004085Reps2     | protein_codi | 162411954 | 162643649 | upstream     | -10103 | 9865   | shortestDistance |
| chrX | 163151954 | 163152378 | 425  | -1.1  | 1.36E-05 | 0.000214 | EN                          |              |           |           |              |        |        |                  |

|      |           |           |      |       |          |          |                    |          |              |           |           |            |         |       |                  |
|------|-----------|-----------|------|-------|----------|----------|--------------------|----------|--------------|-----------|-----------|------------|---------|-------|------------------|
| chrX | 167353596 | 167354050 | 455  | 2.01  | 4.39E-07 | 1.17E-05 | ENSMUSG00000002574 | Prps2    | protein_codi | 167346322 | 167382749 | inside     | 28926   | 7274  | shortestDistance |
| chrX | 167356018 | 167356322 | 305  | -1    | 0.00374  | 0.0199   | ENSMUSG00000002574 | Prps2    | protein_codi | 167346322 | 167382749 | inside     | 26579   | 9696  | shortestDistance |
| chrX | 167434815 | 167435279 | 465  | 1.53  | 3.74E-05 | 0.000497 | ENSMUSG00000008121 | Gm6744   | processed_p  | 167445989 | 167446531 | downstream | 11484   | 10710 | shortestDistance |
| chrX | 167483669 | 167484230 | 562  | -0.98 | 0.00326  | 0.0179   | ENSMUSG00000004917 | Frmptd4  | protein_codi | 167471309 | 168577231 | inside     | 1093281 | 12360 | shortestDistance |
| chrX | 168527157 | 168527432 | 276  | -3.2  | 7.89E-09 | 3.80E-07 | ENSMUSG00000004917 | Frmptd4  | protein_codi | 167471309 | 168577231 | inside     | 49937   | 49799 | shortestDistance |
| chrX | 168804668 | 168805104 | 437  | -1.14 | 0.00135  | 0.00905  | ENSMUSG00000003135 | Arhgap6  | protein_codi | 168795099 | 169304435 | inside     | 9787    | 9569  | shortestDistance |
| chrX | 168810550 | 168811403 | 854  | 1.8   | 1.30E-06 | 2.91E-05 | ENSMUSG00000003135 | Arhgap6  | protein_codi | 168795099 | 169304435 | inside     | 15877   | 15451 | shortestDistance |
| chrX | 168832348 | 168832714 | 367  | -1.91 | 2.29E-06 | 4.73E-05 | ENSMUSG00000003135 | Arhgap6  | protein_codi | 168795099 | 169304435 | inside     | 37432   | 37249 | shortestDistance |
| chrX | 168836424 | 168836641 | 218  | -1.08 | 0.00683  | 0.0317   | ENSMUSG00000003135 | Arhgap6  | protein_codi | 168795099 | 169304435 | inside     | 41433   | 41325 | shortestDistance |
| chrX | 169062598 | 169063051 | 454  | -1    | 0.00792  | 0.0355   | ENSMUSG00000008720 | Gm15261  | antisense_RI | 169037674 | 169106536 | inside     | 43712   | 24924 | shortestDistance |
| chrX | 169095580 | 169095957 | 378  | 1.42  | 0.00328  | 0.018    | ENSMUSG00000008720 | Gm15261  | antisense_RI | 169037674 | 169106536 | inside     | 10768   | 10579 | shortestDistance |
| chrX | 169213110 | 169214157 | 1048 | 0.88  | 0.00986  | 0.042    | ENSMUSG00000003135 | Arhgap6  | protein_codi | 168795099 | 169304435 | inside     | 418535  | 90278 | shortestDistance |
| chrX | 169433909 | 169434324 | 416  | 4.66  | 2.23E-12 | 3.59E-10 | ENSMUSG00000008758 | Gm15245  | lincRNA      | 169447830 | 169475913 | upstream   | -13714  | 13506 | shortestDistance |
| chrX | 169676485 | 169676782 | 298  | -1.27 | 0.00625  | 0.0296   | ENSMUSG00000003529 | Mid1     | protein_codi | 169685199 | 170005736 | upstream   | -8565   | 8417  | shortestDistance |
| chrX | 170675960 | 170676572 | 613  | 1.02  | 0.00894  | 0.039    | ENSMUSG00000009380 | Asmt     | protein_codi | 170672644 | 170678054 | inside     | 3622    | 1482  | shortestDistance |
| chrY | 90744328  | 90744821  | 494  | 1.52  | 0.00484  | 0.0243   | ENSMUSG00000009513 | Mid1-ps1 | unprocessed  | 90753057  | 90763485  | upstream   | -8483   | 8236  | shortestDistance |
