# Supplementary material
Source: PubMed Central journal article supplement (PMC7376385)

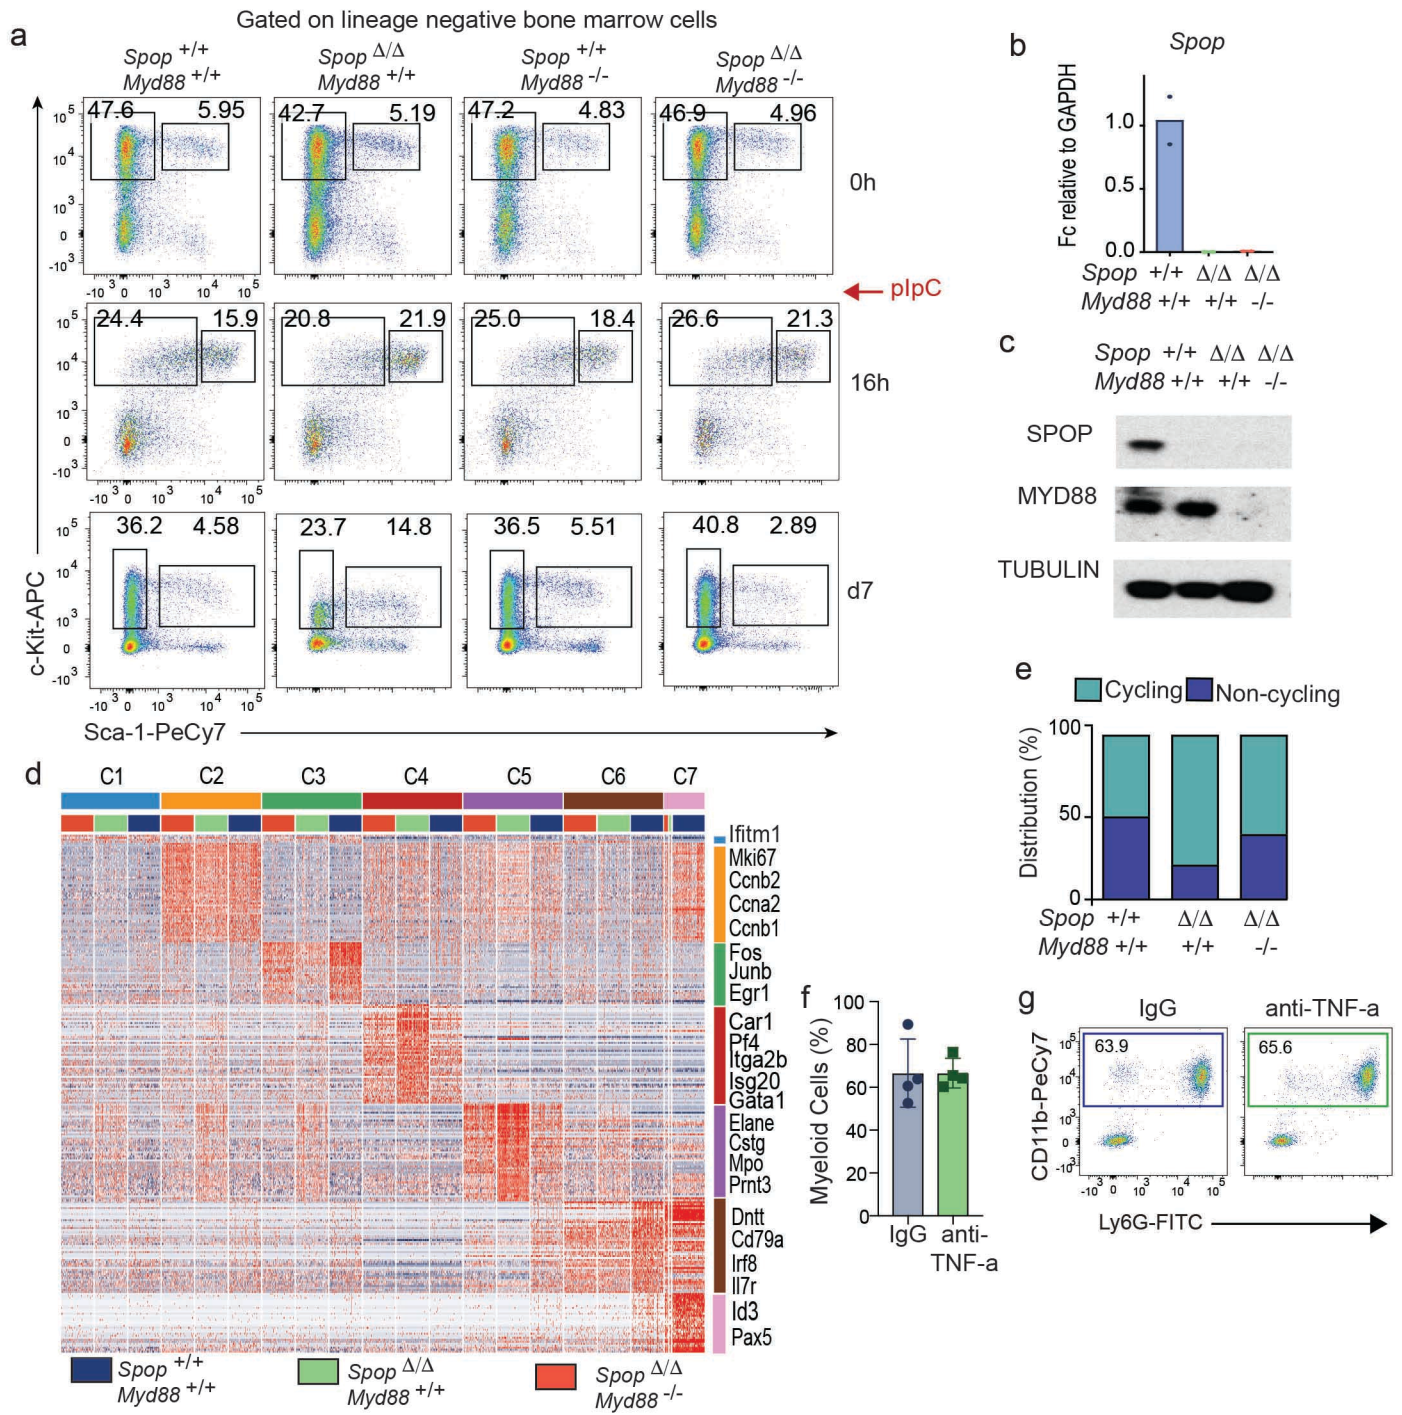

Supplement: NIHMS1580322-supplement-SUPL__Figure_9.pdf [file NIHMS1580322-supplement-SUPL__Figure_9.pdf]
